# Supplementary material for: AITF (4-acetamidophenyl triflimide) mediated synthesis of amides, peptides and esters
Source: Royal Society of Chemistry journal article supplement (doi:10.1039/d3ob01351k), 2023-01-01
Supplement: d3ob01351k1.pdf [file d3ob01351k1.pdf]

## **AITF (4-acetamidophenyl triflimide) mediated synthesis of amides, peptides and esters**

Eti Chetankumar, Swetha Bharamawadeyar, Chinthaginjala Srinivasulu and Vommina V Sureshababu\*

Peptide Research Laboratory, Department of Chemistry, Jnana Bharathi, Bangalore University, Bengaluru  
560 056, India.

E-mail: [hariccb@gmail.com](mailto:hariccb@gmail.com), [sureshababuvommina@rediffmail.com](mailto:sureshababuvommina@rediffmail.com).

### **Contents**

|                                                                                   |             |
|-----------------------------------------------------------------------------------|-------------|
| <b>1. General Experimental information</b>                                        | <b>S2</b>   |
| <b>2. General procedure for the synthesis of coupling reagents</b>                | <b>S3</b>   |
| <b>3. General procedure for the synthesis of amides peptides and esters</b>       | <b>S5</b>   |
| <b>4. Characterization data of compounds</b>                                      | <b>S6</b>   |
| <b>5. HRMS, <sup>1</sup>H and <sup>13</sup>C NMR spectra of compounds</b>         | <b>S32</b>  |
| <b>6. RP-HPLC Chromatograms of compounds</b>                                      | <b>S210</b> |
| <b>7. Single crystal X-ray diffraction analysis</b>                               | <b>S253</b> |
| <b>8. Differential scanning calorimetry (DSC) analysis of triflate surrogates</b> | <b>S266</b> |

## General Experimental Information

All commercially available reagents were used as received without further purification. The solvents were purified and dried by standard procedures prior to use. Reaction progress was monitored by MERCK thin layer chromatography (TLC) performed on aluminium plates coated with silica gel 60 F254. Chromatograms were visualized by UV light at 254 nm or by staining using KMnO<sub>4</sub>, Iodine. High resolution mass spectra were recorded on a Micromass Q-TOF micromass spectrometer using electron spray ionization mode. <sup>1</sup>H NMR and <sup>13</sup>C NMR spectra were recorded on a Bruker AMX 400 MHz and 100 MHz spectrometer, respectively in DMSO-*d*<sub>6</sub> using TMS as internal standard. Chemical shifts ( $\delta$ ) for <sup>1</sup>H and <sup>13</sup>C are given in ppm and coupling constants (J) quoted in Hz. <sup>1</sup>H NMR splitting patterns were designated as s, singlet; d, doublet; t, triplet; q, quartet; m, multiplet; br, broad signal. The RP-HPLC analysis of isomers was carried out by using an Agilent instrument at  $\lambda = 254$  nm; column: Phenomenex Lux Cellulose-1, pore size-5  $\mu$ m, diameter  $\times$  length = 4.6  $\times$  250 mm. For purification of products, column chromatography was performed on silica gel (100-200 mesh) using ethyl acetate and hexane mixture as eluent. Evaporation of solvents was performed under reduced pressure with a Büchi rotary evaporator. Melting points were determined in an open capillary using VEEGO, model: VMP-DS. Differential scanning calorimetry (DSC) was recorded on a Perkin Elmer Differential scanning calorimeter 8000.

## Experimental section:

### Procedure for synthesis of coupling reagents:

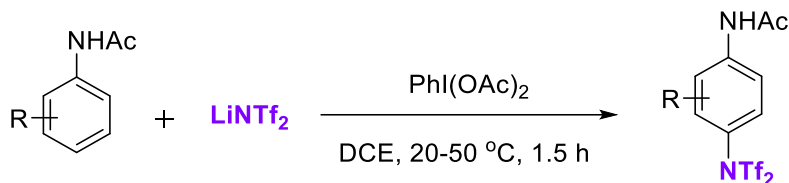

To a solution of acetanilide (0.5 mmol, 1.0 equiv) and LiNTf<sub>2</sub> (0.6 mmol, 1.2 equiv) in DCE (8 mL, 0.06 M) in a Schlenk flask under argon was added (diacetoxyiodo)benzene (DIB) (0.6 mmol, 1.2 equiv). The resulting mixture was stirred for 1.5 hours at 50 °C then filtered through a short plug of celite and concentrated under reduced pressure. The crude product was purified by silica gel chromatography.

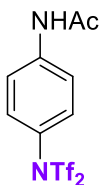

N-(4-((1,1,1-trifluoro-N-((trifluoromethyl)sulfonyl)methyl)sulfonamido)phenyl)acetamide (**III**)  
White solid; Yield 78 %; M.p.154-162 °C; <sup>1</sup>H NMR (400 MHz, DMSO-*d*<sub>6</sub>) δ 10.40 (s, 1H), 7.80 (d, *J* = 9.0 Hz, 2H), 7.61 (d, *J* = 8.8 Hz, 2H), 2.10 (s, 3H); <sup>13</sup>C NMR (101 MHz, DMSO-*d*<sub>6</sub>) δ 169.0, 142.8, 131.8, 128.6, 124.4, 120.4, 119.7, 118.9, 117.1, 24.0. HRMS (ESI-TOF) *m/z*: [M+H]<sup>+</sup> Calcd for C<sub>10</sub>H<sub>8</sub>F<sub>6</sub>N<sub>2</sub>O<sub>5</sub>S<sub>2</sub> 414.9857, found 414.9845.

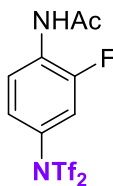

N-(2-fluoro-4-((1,1,1-trifluoro-N-((trifluoromethyl)sulfonyl)methyl)sulfonamido)phenyl)acetamide (**IV**)

White solid; Yield 59 %; M.p.136-137 °C;  $^1\text{H}$  NMR (400 MHz,  $\text{DMSO-}d_6$ )  $\delta$  10.14 (s, 1H), 8.28 (t,  $J = 8.7$  Hz, 1H), 7.95 – 7.88 (m, 1H), 7.54 (d,  $J = 8.9$  Hz, 1H), 2.15 (s, 3H).  $^{13}\text{C}$  NMR (101 MHz,  $\text{DMSO-}d_6$ )  $\delta$  169.2, 154.8, 152.4, 131.5, 131.4, 131.3, 131.2, 128.42 (2), 125.4, 125.2, 123.6, 123.5, 119.45 (2), 111.1, 110.9, 23.8.

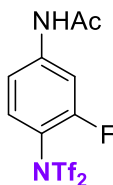

N-(3-fluoro-4-((1,1,1-trifluoro-N-((trifluoromethyl)sulfonyl)methyl)sulfonamido)phenyl)acetamide (**V**)

White solid; Yield 50 %; M.p.137-138 °C;  $^1\text{H}$  NMR (400 MHz,  $\text{DMSO-}d_6$ )  $\delta$  10.14 (s, 1H), 8.27 (t,  $J = 8.7$  Hz, 1H), 7.92 (d,  $J = 10.8$  Hz, 1H), 7.54 (d,  $J = 8.9$  Hz, 1H), 2.15 (s, 3H).  $^{13}\text{C}$  NMR (101 MHz,  $\text{DMSO-}d_6$ )  $\delta$  169.2, 154.8, 152.4, 131.5, 131.4, 131.3, 131.2, 128.4, 125.4, 125.2 (2), 121.7, 119.4 (2), 118.5, 111.1, 110.9, 23.8.

### Procedure for synthesis of peptides:

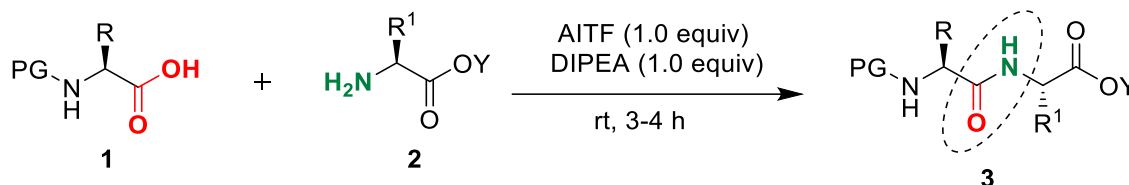

AITF (1.0 equiv) was added to a stirred solution of *N*<sup>α</sup>-protected amino acid **1** (1.0 equiv) and DIPEA (1.0 equiv) in CH<sub>3</sub>CN (3 mL) at room temperature. Then the reaction mixture was stirred for 20 min and amino acid ester (1.2 equiv) was added and the reaction mixture was stirred for 2.5 h at room temperature. The progress of the reaction was monitored by TLC. Thereafter, the reaction mixture was concentrated using rotary evaporator and then diluted with 15 mL of ethyl acetate and washed with 5% HCl (10 mL x 2) 5% Na<sub>2</sub>CO<sub>3</sub> (10 mL x 2), saturated NaCl solution and dried over anhydrous Na<sub>2</sub>SO<sub>4</sub>. The solvent was removed in vacuo, and the resulting crude product was purified by silica gel column chromatography using the mixture of hexane and ethyl acetate as eluents to afford **3**.

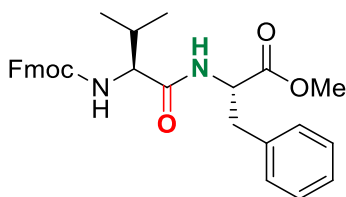

(*S*)-methyl 2-(((*S*)-2-(((9*H*-fluoren-9-yl)methoxy)carbonyl)amino)-3-methylbutanamido)-3-phenylpropanoate (**3a**)

White solid; Yield 93 %; M.p. 168-172 °C; [ $\alpha$ ]<sub>D</sub><sup>25</sup> = -11.00 (c 1.0, CH<sub>3</sub>OH); <sup>1</sup>H NMR (400 MHz, DMSO-*d*<sub>6</sub>)  $\delta$  8.34 (d, *J* = 8Hz, 1H), 7.89 (d, *J* = 8Hz, 2H), 7.73 (dd, *J* = 8Hz, *J* = 4Hz, 2H), 7.42 (t, *J* = 8Hz, 2H), 7.31 (dd, *J* = 16Hz, *J* = 4Hz, 3H), 7.23-7.16 (m, 5H), 4.48 (dd, *J* = 12Hz, *J* = 8Hz, 1H), 4.30-4.21 (m, 3H), 3.87 (t, *J* = 8Hz, 1H), 3.55 (s, 3H), 3.02 (dd, *J* = 12Hz, *J* = 8Hz, 1H), 2.92 (dd, *J* = 12Hz, *J* = 8Hz, 1H), 1.99 (dd, *J* = 12Hz, *J* = 8Hz, 1H), 0.82 (d, *J* = 4Hz, 6H); <sup>13</sup>C NMR (101 MHz, DMSO-*d*<sub>6</sub>)  $\delta$  171.7, 171.2, 155.9, 143.9, 143.7, 140.6, 137.0, 128.9, 128.1,

127.6, 127.0, 125.3, 120.0, 65.6, 59.8, 53.4, 51.6, 46.6, 36.5, 30.4, 19.0, 18.1; IR (cm<sup>-1</sup>): 3290, 2960, 1741, 1696, 1645, 1529, 1444, 1291, 1245, 1212, 1103, 1027, 757, 697; HRMS (ESI-TOF) m/z : [M+H]<sup>+</sup> Calcd for C<sub>30</sub>H<sub>33</sub>N<sub>2</sub>O<sub>5</sub> 501.2389, found 501.2384.

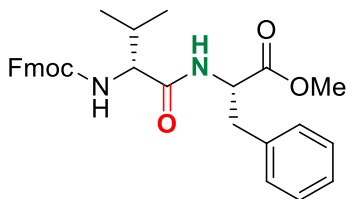

(S)-methyl 2-((R)-2-(((9H-fluoren-9-yl)methoxy)carbonyl)amino)-3-methylbutanamido)-3-phenylpropanoate (**3a\***)

White solid; Yield 90 %; M.p. 193-197 °C; [ $\alpha$ ]<sub>D</sub><sup>25</sup> = +29.52 (c 1.0, CH<sub>3</sub>OH); <sup>1</sup>H NMR (400 MHz, DMSO-*d*<sub>6</sub>)  $\delta$  8.38 (d, *J* = 8.0 Hz, 1H), 7.89 (d, *J* = 8.0 Hz, 2H), 7.75 (d, *J* = 8.0 Hz, 2H), 7.42 (dd, *J* = 8.0, 8.0 Hz, 2H), 7.34 – 7.16 (m, 8H), 4.54-4.48 (m, 1H), 4.32 – 4.17 (m, 3H), 3.89 (dd, *J* = 8.0, 8.0 Hz, 1H), 3.61 (s, 3H), 3.06 (dd, *J* = 16, 8 Hz, 1H), 2.87 (dd, *J* = 12, 12 Hz, 1H), 1.87-1.78 (m, 1H), 0.66 (dd, *J* = 8.0, 8.0 Hz, 6H); <sup>13</sup>C NMR (101 MHz, DMSO-*d*<sub>6</sub>)  $\delta$  171.9, 171.1, 156.0, 143.8, 143.7, 140.6 (2), 137.1, 129.0, 128.1, 127.6, 127.0, 126.4, 125.4, 125.3, 120.0, 65.7, 59.7, 53.4, 51.8, 46.6, 36.7, 30.4, 19.0, 17.6; HRMS (ESI-TOF) m/z : [M+H]<sup>+</sup> Calcd for C<sub>30</sub>H<sub>33</sub>N<sub>2</sub>O<sub>5</sub> 501.2389, found 501.2386.

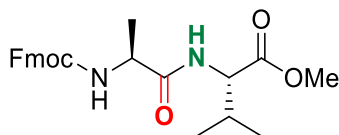

(S)-methyl 2-((S)-2-(((9H-fluoren-9-yl)methoxy)carbonyl)amino)propanamido)-3-methylbutanoate (**3b**)

White solid; Yield 91%; M.p. 149-153 °C; [ $\alpha$ ]<sub>D</sub><sup>25</sup> = +207.70 (c 1.0, CH<sub>3</sub>OH); <sup>1</sup>H NMR (400 MHz, DMSO-*d*<sub>6</sub>)  $\delta$  8.08 (d, *J* = 12Hz, 1H), 7.89 (d, *J* = 8Hz, 2H), 7.72 (t, *J* = 8Hz, 2H), 7.53 (d, *J* = 8Hz, 1H), 7.41 (t, *J* = 8Hz, 2H), 7.32 (t, *J* = 8Hz, 2H), 4.27-4.15 (m, 5H), 3.62 (s, 3H), 2.05-1.99 (m, 1H), 1.21 (d, *J* = 8Hz, 3H), 0.87 (t, *J* = 4Hz, 6H); <sup>13</sup>C NMR (101 MHz, DMSO-*d*<sub>6</sub>)  $\delta$  172.9, 171.9, 155.5, 143.8, 143.7, 140.6, 127.6, 127.0, 125.2 (2), 120.0, 65.5, 57.2, 51.6, 49.5, 46.5, 29.9, 18.8, 18.1 (2); IR (cm<sup>-1</sup>): 3304, 2927, 1733, 1686, 1650, 1549, 1447, 1255, 1208,

1016, 794, 664; HRMS (ESI-TOF)  $m/z$ :  $[M+Na]^+$  Calcd for  $C_{24}H_{28}N_2NaO_5$  447.1896, found 447.1873.

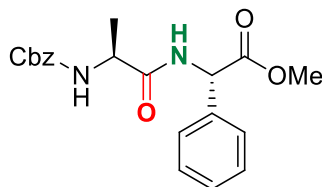

methyl (S)-2-((S)-2-((benzyloxy)carbonyl)amino)propanamido)-2-phenylacetate (**3c**)

White solid; Yield 92%; M.p. 122-125 °C;  $[\alpha]_D^{25} = +226.46$  (c 1.0,  $CH_3OH$ );  $^1H$  NMR (400 MHz,  $DMSO-d_6$ )  $\delta$  8.66 (d,  $J = 4Hz$ , 1H), 7.45 (d,  $J = 8Hz$ , 1H), 7.39-7.27 (m, 10H), 5.41 (d,  $J = 4Hz$ , 1H), 5.00 (s, 2H), 4.24-4.17 (m, 1H), 3.62 (s, 3H), 1.24 (d,  $J = 4Hz$ , 3H);  $^{13}C$  NMR (101 MHz,  $DMSO-d_6$ )  $\delta$  172.6, 170.9, 155.5, 137.0, 135.9, 128.6, 128.3, 127.7, 127.6, 65.3, 56.1, 52.2, 49.5, 18.1; IR ( $cm^{-1}$ ): 3304, 2952, 1735, 1693, 1650, 1527, 1496, 1210, 1122, 1060, 731, 694; HRMS (ESI-TOF)  $m/z$ :  $[M+Na]^+$  Calcd for  $C_{20}H_{22}N_2NaO_5$  393.1426, found 393.1424.

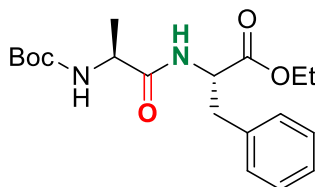

(S)-ethyl 2-((S)-2-((tert-butoxycarbonyl)amino)propanamido)-3-phenylpropanoate (**3d**)

White solid; Yield 86%; M.p. 100.5-102 °C;  $[\alpha]_D^{25} = -98.97$  (c 1.0,  $CH_3OH$ );  $^1H$  NMR (400 MHz,  $DMSO-d_6$ )  $\delta$  8.13 (d,  $J = 8Hz$ , 1H), 7.29-7.20 (m, 5H), 6.86 (d,  $J = 8Hz$ , 1H), 4.42 (dd,  $J = 16Hz$ ,  $J = 8Hz$ , 1H), 4.04-3.95 (m, 3H), 3.01-2.94 (m, 2H), 1.36 (s, 9H), 1.13-1.06 (m, 6H);  $^{13}C$  NMR (101 MHz,  $DMSO-d_6$ )  $\delta$  172.8, 171.3, 154.8, 137.0, 129.1, 128.1, 126.5, 77.9, 60.4, 53.4, 49.4, 36.6, 28.1, 18.1, 13.8; HRMS (ESI-TOF)  $m/z$ :  $[M+Na]^+$  Calcd for  $C_{19}H_{28}N_2NaO_5$  387.1896, found 387.1857.

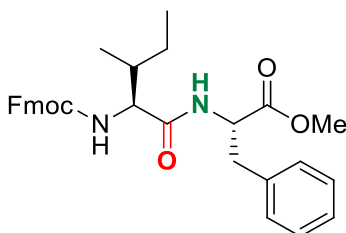

(S)-methyl 2-((2S,3R)-2-((((9H-fluoren-9-yl)methoxy)carbonyl)amino)-3-methylpentanamido)-3-phenylpropanoate(**3e**)

White solid; Yield 89%; M.p. 175-178 °C;  $[\alpha]_D^{25} = -139.96$  (c 1.0, CH<sub>3</sub>OH); <sup>1</sup>H NMR (400 MHz, DMSO-*d*<sub>6</sub>) δ 8.41 (d, *J* = 7.4 Hz, 1H), 7.91 (d, *J* = 7.5 Hz, 2H), 7.75 (d, *J* = 6.5 Hz, 2H), 7.43 (t, *J* = 7.4 Hz, 2H), 7.37 – 7.31 (m, 3H), 7.24 – 7.17 (m, 5H), 4.52 – 4.46 (m, 1H), 4.32 – 4.22 (m, 3H), 3.91 (t, *J* = 8.7 Hz, 1H), 3.56 (s, 3H), 3.03 (dd, *J* = 13.8, 6.0 Hz, 1H), 2.94 (dd, *J* = 13.8, 8.8 Hz, 1H), 1.72-1.66 (m, 1H), 1.13 – 1.05 (m, 2H), 0.83 – 0.78 (m, 6H); <sup>13</sup>C NMR (101 MHz, DMSO-*d*<sub>6</sub>) δ 171.7, 171.3, 155.8, 143.9, 143.7, 140.6, 137.0, 128.9, 128.1, 127.6, 127.0, 126.4, 125.3, 120.0, 65.5, 58.7, 53.4, 51.6, 46.6, 36.5, 36.3, 24.2, 15.0, 10.7; IR (cm<sup>-1</sup>): 2964, 1751, 1691, 1649, 1536, 1449, 1289, 1206, 1121, 1031, 757; HRMS (ESI-TOF) *m/z*: [M+Na]<sup>+</sup> Calcd for C<sub>31</sub>H<sub>34</sub>N<sub>2</sub>NaO<sub>5</sub> 537.2365, found 537.2351.

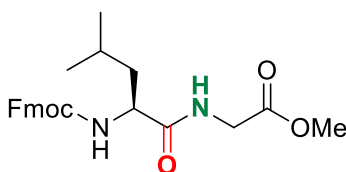

(S)-methyl 2-(2-((((9H-fluoren-9-yl)methoxy)carbonyl)amino)-4-methylpentanamido)acetate (**3f**)

White solid; Yield 91%; M.p. 125-128 °C;  $[\alpha]_D^{25} = -268.94$  (c 1.0, CH<sub>3</sub>OH); <sup>1</sup>H NMR (400 MHz, DMSO-*d*<sub>6</sub>) δ 8.35 (t, *J* = 5.8 Hz, 1H), 7.90 (d, *J* = 7.5 Hz, 2H), 7.74 (dd, *J* = 7.3, 3.4 Hz, 2H), 7.55 (d, *J* = 8.4 Hz, 1H), 7.42 (t, *J* = 7.4 Hz, 2H), 7.33 (td, *J* = 7.2, 3.5 Hz, 2H), 4.33 – 4.20 (m, 3H), 4.11 – 4.05 (m, 1H), 3.84 (qd, *J* = 17.4, 5.9 Hz, 2H), 3.62 (s, 3H), 1.69 – 1.60 (m, 1H), 1.55 – 1.41 (m, 2H), 0.88 (dd, *J* = 15.3, 6.6 Hz, 6H). <sup>13</sup>C NMR (101 MHz, DMSO-*d*<sub>6</sub>) δ 173.4, 170.7, 156.3, 144.3 (2), 141.1, 128.1, 127.5, 125.8, 120.5, 66.0, 53.2, 52.1, 47.1, 41.1, 40.9, 24.5, 23.4, 21.8; HRMS (ESI-TOF) *m/z*: [M+H]<sup>+</sup> Calcd for C<sub>31</sub>H<sub>34</sub>N<sub>2</sub>NaO<sub>5</sub> 425.2076, found 425.2075.

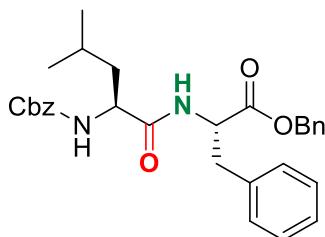



(S)-benzyl 2-((S)-2-(((benzyloxy)carbonyl)amino)-4-methylpentanamido)-3-phenylpropanoate  
**(3g)**

White solid; Yield 90%; M.p. 96-102 °C;  $[\alpha]_D^{25} = -312.26$  (c 1.0, CH<sub>3</sub>OH); <sup>1</sup>H NMR (400 MHz, DMSO-*d*<sub>6</sub>) δ 8.42 (d, *J* = 7.3 Hz, 1H), 7.40 – 7.10 (m, 15H), 5.11 – 4.97 (m, 4H), 4.60 – 4.47 (m, 1H), 4.10 – 4.04 (m, 1H), 3.08 – 2.96 (m, 2H), 1.67 – 1.45 (m, 2H), 1.41 – 1.33 (m, 1H), 0.85 – 0.78 (m, 6H). <sup>13</sup>C NMR (101 MHz, DMSO-*d*<sub>6</sub>) δ 172.9, 171.7, 156.2, 137.5, 136.1, 129.5, 128.8, 128.6, 128.4, 128.3, 128.2, 128.1, 128.0, 127.8, 126.9, 66.4, 65.7, 54.0, 53.2, 41.1, 36.9, 24.5, 23.4, 21.8; HRMS (ESI-TOF) *m/z*: [M+Na]<sup>+</sup> Calcd for C<sub>30</sub>H<sub>34</sub>N<sub>2</sub>NaO<sub>5</sub> 525.2365, found 525.2369.

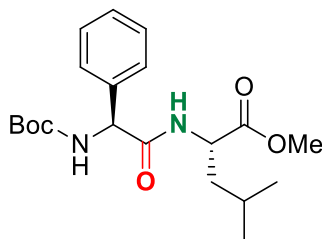

(S)-methyl 2-((S)-2-((tert-butoxycarbonyl)amino)-2-phenylacetamido)-4-methylpentanoate **(3h)**

White solid; Yield 92%; M.p. 81-82 °C;  $[\alpha]_D^{25} = -69.86$  (c 1.0, CH<sub>3</sub>OH); <sup>1</sup>H NMR (400 MHz, DMSO-*d*<sub>6</sub>): δ 8.52 (d, *J* = 8Hz, 1H), 7.39 (t, *J* = 8Hz, 2H), 7.34-7.27 (m, 4H), 5.23 (d, *J* = 8Hz, 1H), 4.33-4.27 (m, 1H), 3.53 (s, 3H), 1.60-1.53 (m, 3H), 1.38 (s, 9H), 0.85 (dd, *J* = 20Hz, *J* = 8Hz, 6H); <sup>13</sup>C NMR (101 MHz, DMSO-*d*<sub>6</sub>) δ 172.5, 170.0, 154.8, 138.3, 128.0, 127.4, 127.1, 78.3, 57.3, 51.7, 50.2, 40.1, 28.1, 24.0, 22.7, 21.2; IR (cm<sup>-1</sup>): 2964, 2888, 1725, 1670, 1522, 1377, 1152, 700; HRMS (ESI-TOF) *m/z*: [M+H]<sup>+</sup> Calcd for C<sub>20</sub>H<sub>31</sub>N<sub>2</sub>O<sub>5</sub> 379.2233, found 379.2223.

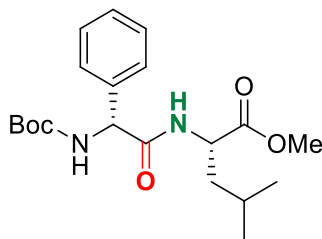

(S)-methyl 2-((R)-2-((tert-butoxycarbonyl)amino)-2-phenylacetamido)-4-methylpentanoate  
**(3h\*)**

White solid; Yield 89 %; M.p. 110-114 °C;  $[\alpha]_D^{25} = -162.88$  (c 1.0, CH<sub>3</sub>OH); <sup>1</sup>H NMR (400 MHz, DMSO-*d*<sub>6</sub>) δ 8.54 (d, *J* = 8.0 Hz, 1H), 7.42 (t, *J* = 8.0 Hz, 2H), 7.33 – 7.26 (m, 3H), 7.19 (d, *J* = 12 Hz, 1H), 5.24 (d, *J* = 8.0 Hz, 1H), 4.25-4.19 (m, 1H), 3.62 (s, 3H), 1.58-1.42 (m, 3H), 1.38 (s, 9H), 0.71 (dd, *J* = 44.4, 6.3 Hz, 6H); <sup>13</sup>C NMR (101 MHz, DMSO-*d*<sub>6</sub>) δ 172.7, 170.1, 154.7, 138.8, 128.1, 127.4, 127.0, 78.4, 57.5, 51.8, 50.2, 40.2, 28.0, 24.0, 22.6, 20.9; HRMS (ESI-TOF) *m/z*: [M+Na]<sup>+</sup> Calcd for C<sub>20</sub>H<sub>30</sub>N<sub>2</sub>NaO<sub>5</sub> 401.2052, found 401.2052.

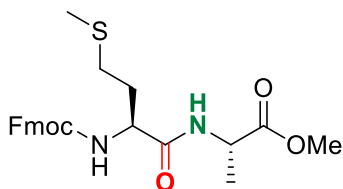

(S)-methyl 2-((S)-2-(((9H-fluoren-9-yl)methoxy)carbonyl)amino(methylthio)butanamido)propanoate (**3i**)

White solid; Yield 88 %; M.p. 155-158 °C;  $[\alpha]_D^{25} = +46.31$  (c 1.0, CH<sub>3</sub>OH); <sup>1</sup>H NMR (400 MHz, DMSO-*d*<sub>6</sub>) δ 8.39 (d, *J* = 8Hz, 1H), 7.89 (d, *J* = 8Hz, 2H), 7.73 (t, *J* = 4Hz, 2H), 7.58 (d, *J* = 8Hz, 1H), 7.44-7.31 (m, 4H), 4.28-4.19 (m, 4H), 4.14-4.09 (m, 1H), 3.61 (s, 3H), 2.47 (d, *J* = 8Hz, 2H), 2.05 (s, 3H), 1.92-1.78 (m, 2H), 1.28 (d, *J* = 8Hz, 3H); <sup>13</sup>C NMR (101 MHz, DMSO-*d*<sub>6</sub>) δ 172.9, 171.4, 155.8, 143.8, 143.7, 140.6, 127.6, 127.0, 125.3, 120.1, 65.5, 53.4, 51.8, 47.5, 46.6, 31.7, 29.4, 16.7, 14.6; HRMS (ESI-TOF) *m/z*: [M+H]<sup>+</sup> Calcd for C<sub>24</sub>H<sub>29</sub>N<sub>2</sub>O<sub>5</sub>S 457.1719, found 457.1789.

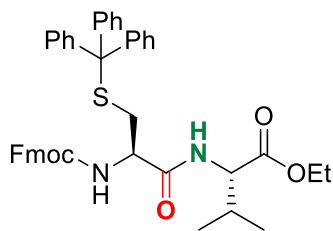

(S)-ethyl 2-((R)-2-(((9H-fluoren-9-yl)methoxy)carbonyl)amino)-3-(tritylthio)propanamido)-3-methylbutanoate (**3j**)

White solid; Yield 88 %; M.p. 110-132 °C;  $[\alpha]_D^{25} = +219.28$  (c 1.0, CH<sub>3</sub>OH); <sup>1</sup>H NMR (400 MHz, DMSO-*d*<sub>6</sub>) δ 7.99 (d, *J* = 8Hz, 1H), 7.89 (d, *J* = 4Hz, 2H), 7.72 (t, *J* = 8Hz, 2H), 7.42-7.22 (m, 20H), 4.30-4.17 (m, 4H), 4.08-3.95 (m, 3H), 2.41-2.33 (m, 2H), 2.03-1.95 (m, 1H), 1.05 (t, *J* = 8Hz, 3H), 0.82 (t, *J* = 8Hz, 6H); <sup>13</sup>C NMR (101 MHz, DMSO-*d*<sub>6</sub>) δ 170.8, 170.2, 155.6, 144.2,

143.7, 143.6, 140.6, 129.0, 128.0, 127.6, 127.0, 126.7, 125.3, 120.0, 65.7, 60.2, 57.4, 53.3, 46.5, 33.9, 29.8, 18.7, 18.0, 13.9; HRMS (ESI-TOF)  $m/z$ :  $[M+Na]^+$  Calcd for  $C_{44}H_{44}N_2NaO_5S$  735.2869, found 735.2848.

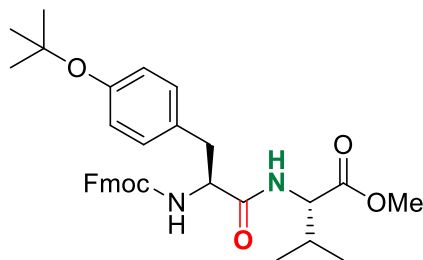

(S)-methyl 2-(((S)-2-(((9H-fluoren-9-yl)methoxy)carbonyl)amino)-3-(4-(tert-butoxy)phenyl)propanamido)-3-methylbutanoate (**3k**)

White solid; Yield 90%; M.p. 80.2-82.5 °C;  $[\alpha]_D^{25} = +13.77$  (c 1.0,  $CH_3OH$ );  $^1H$  NMR (400 MHz,  $DMSO-d_6$ )  $\delta$  8.24 (d,  $J = 8Hz$ , 1H), 7.87 (d,  $J = 8Hz$ , 2H), 7.66-7.61 (m, 3H), 7.40 (t,  $J = 8Hz$ , 2H), 7.32-7.21 (m, 4H), 6.82 (d,  $J = 8Hz$ , 2H), 4.39-4.34 (m, 1H), 4.22-4.08 (m, 4H), 3.63 (s, 3H), 2.92 (dd,  $J = 12Hz$ ,  $J = 4Hz$ , 1H), 2.72 (dd,  $J = 12Hz$ ,  $J = 12Hz$ , 1H), 2.09-2.01 (m, 1H), 1.19 (s, 9H), 0.89 (dd,  $J = 12Hz$ ,  $J = 4Hz$ , 6H);  $^{13}C$  NMR (101 MHz,  $DMSO-d_6$ )  $\delta$  172.0, 171.8, 155.7, 153.3, 143.7, 140.6 (2), 132.5, 129.7, 127.5, 127.0, 125.3, 125.2, 123.2, 120.0, 77.5, 65.6, 57.3, 55.7, 51.6, 46.5, 36.7, 29.9, 28.4, 18.9, 18.2; HRMS (ESI-TOF)  $m/z$ :  $[M+H]^+$  Calcd for  $C_{34}H_{41}N_2O_6$  573.2965, found 573.2932.

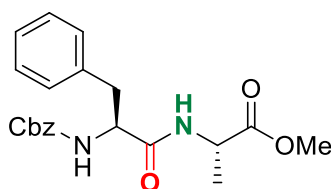

(S)-methyl 2-(((S)-2-(((benzyloxy)carbonyl)amino)-3-phenylpropanamido)propanoate (**3l**)

White solid; Yield 93%; M.p. 126-128 °C;  $[\alpha]_D^{25} = -47.79$  (c 1.0,  $CH_3OH$ );  $^1H$  NMR (400 MHz,  $DMSO-d_6$ )  $\delta$  8.52 (d,  $J = 8Hz$ , 1H), 7.51 (d,  $J = 8Hz$ , 1H), 7.34-7.20 (m, 10H), 4.92 (s, 2H), 4.33-4.25 (m, 2H), 3.62 (s, 3H), 3.00 (dd,  $J = 8Hz$ ,  $J = 4Hz$ , 1H), 2.71 (dd,  $J = 12Hz$ ,  $J = 12Hz$ , 1H), 1.31 (d,  $J = 8Hz$ , 3H);  $^{13}C$  NMR (101 MHz,  $DMSO-d_6$ )  $\delta$  172.9, 171.6, 155.8, 138.0, 136.9, 129.1, 128.2, 128.0, 127.6, 127.4, 126.2, 65.1, 55.7, 51.8, 47.5, 37.3, 16.8; IR ( $cm^{-1}$ ): 2950, 1742,

1650, 1536, 1257, 745, 696; HRMS (ESI-TOF)  $m/z$ :  $[M+H]^+$  Calcd for  $C_{21}H_{25}N_2O_5$  385.1763, found 385.1760.

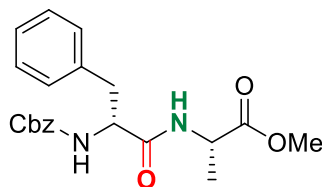

(S)-methyl 2-((R)-2-(((benzyloxy)carbonyl)amino)-3-phenylpropanamido)propanoate (**31\***)

White solid; Yield 92%; M.p. 132-135 °C;  $[\alpha]_D^{25} = +60.22$  (c 1.0,  $CH_3OH$ );  $^1H$  NMR (400 MHz,  $DMSO-d_6$ )  $\delta$  8.42 (d,  $J = 8Hz$ , 1H), 7.45 (d,  $J = 12Hz$ , 1H), 7.34-7.18 (m, 10H), 4.95 (d,  $J = 4Hz$ , 2H), 4.34-4.24 (m, 2H), 3.63 (s, 3H), 2.95 (dd,  $J = 12Hz$ ,  $J = 4Hz$ , 1H), 2.76 (t,  $J = 12Hz$ , 1H), 1.23 (d,  $J = 8Hz$ , 3H);  $^{13}C$  NMR (101 MHz,  $DMSO-d_6$ )  $\delta$  172.8, 171.2, 155.6, 137.8, 137.0, 129.2, 128.2, 127.9, 127.6, 127.3, 126.2, 66.1, 55.8, 51.8, 47.5, 37.8, 17.1; HRMS (ESI-TOF)  $m/z$ :  $[M+H]^+$  Calcd for  $C_{21}H_{25}N_2O_5$  385.1763, found 385.1759.

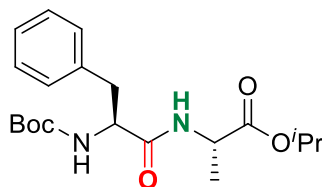

(S)-isopropyl 2-((S)-2-((tert-butoxycarbonyl)amino)-3-phenylpropanamido)propanoate (**3m**)

White solid; Yield %; M.p. 98-102 °C;  $[\alpha]_D^{25} = -224.80$  (c 1.0,  $CH_3OH$ );  $^1H$  NMR (400 MHz,  $DMSO-d_6$ ):  $\delta$  8.32 (d,  $J = 4Hz$ , 1H), 7.28-7.17 (m, 5H), 6.85 (d,  $J = 8Hz$ , 1H), 4.92-4.85 (m, 1H), 4.25-4.16 (m, 2H), 2.98 (dd,  $J = 12Hz$ ,  $J = 4Hz$ , 1H), 2.71 (dd,  $J = 16Hz$ ,  $J = 8Hz$ , 1H), 1.28 (s, 9H), 1.19 (dd,  $J = 12Hz$ ,  $J = 8Hz$ , 9H);  $^{13}C$  NMR (101 MHz,  $DMSO-d_6$ ): 171.9, 171.7, 155.2, 138.3, 129.1, 127.9, 126.1, 77.8, 67.7, 55.3, 47.8, 37.3, 28.1, 21.4 (2), 16.8; HRMS (ESI-TOF)  $m/z$ :  $[M+Na]^+$  Calcd for  $C_{20}H_{30}N_2NaO_5$  401.2052, found 401.2042.

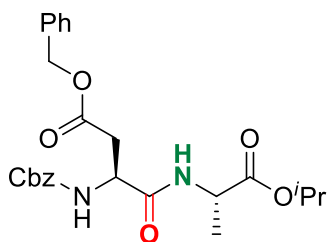

(S)-benzyl 3-(((benzyloxy)carbonyl)amino)-4-(((S)-1-isopropoxy-1-oxopropan-2-yl)amino)-4-oxobutanoate (**3n**)

White solid; Yield 90%; M.p. 98-105 °C;  $[\alpha]_D^{25} = -60.77$  (c 1.0, CH<sub>3</sub>OH); <sup>1</sup>H NMR (400 MHz, DMSO-*d*<sub>6</sub>) δ 8.33 (d, *J* = 4Hz, 1H), 7.58 (d, *J* = 8Hz, 1H), 7.38-7.29 (m, 10H), 5.10 (d, *J* = 4Hz, 2H), 5.02 (s, 2H), 4.89-4.83 (m, 1H), 4.51-4.45 (m, 1H), 4.20-4.13 (m, 1H), 2.78 (dd, *J* = 16Hz, *J* = 4Hz, 1H), 2.62 (dd, *J* = 20Hz, *J* = 8Hz, 1H), 1.25 (d, *J* = 8Hz, 3H), 1.16 (t, *J* = 4Hz, 6H); <sup>13</sup>C NMR (101 MHz, DMSO-*d*<sub>6</sub>) δ 171.8, 170.5, 169.8, 155.7, 136.8, 136.0, 128.3, 128.3, 127.9, 127.7, 127.6, 67.8, 65.6, 65.4, 50.9, 47.9, 36.3, 21.4, 21.3, 16.6; HRMS (ESI-TOF) *m/z*: [M+H]<sup>+</sup> Calcd for C<sub>25</sub>H<sub>31</sub>N<sub>2</sub>O<sub>7</sub> 471.2131, found 471.2118.

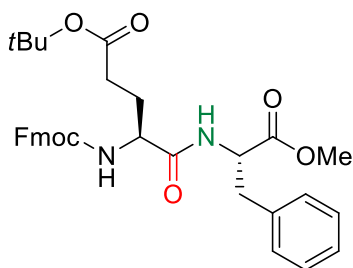

(S)-tert-butyl 4-(((9H-fluoren-9-yl)methoxy)carbonyl)amino)-5-(((S)-1-methoxy-1-oxophenylpropan-2-yl)amino)-5-oxopentanoate (**3o**)

White solid; Yield 83%; M.p. 85-109 °C;  $[\alpha]_D^{25} = -153.60$  (c 1.0, CH<sub>3</sub>OH); <sup>1</sup>H NMR (400 MHz, DMSO-*d*<sub>6</sub>) δ 8.33 (d, *J* = 8Hz, 1H), 7.89 (d, *J* = 8Hz, 2H), 7.72 (t, *J* = 8Hz, 2H), 7.49-7.40 (m, 3H), 7.34-7.18 (m, 7H), 4.47 (dd, *J* = 12Hz, *J* = 8Hz, 1H), 4.30-4.18 (m, 3H), 4.04 (dd, *J* = 16Hz, *J* = 8Hz, 1H), 3.58 (s, 3H), 3.02 (dd, *J* = 16Hz, *J* = 4Hz, 1H), 2.94 (dd, *J* = 16Hz, *J* = 8Hz, 1H), 2.19 (t, *J* = 8Hz, 2H), 1.87-1.78 (m, 1H), 1.75-1.65 (m, 1H), 1.39 (s, 9H); <sup>13</sup>C NMR (101 MHz, DMSO-*d*<sub>6</sub>) δ 171.7, 171.6, 171.4, 155.7, 143.8, 143.7, 140.6, 136.9, 129.0, 128.1, 127.6, 127.0, 126.5, 125.2, 120.0, 79.6, 65.6, 53.5, 51.8, 46.6, 40.1, 36.4, 31.1, 27.7, 27.3; IR (cm<sup>-1</sup>):

2977, 1730, 1693, 1645, 1530, 1204, 1153, 1083, 737, 697; HRMS (ESI-TOF)  $m/z$ :  $[M+Na]^+$   
 Calcd for  $C_{34}H_{38}N_2NaO_7$  609.2577, found 609.2508.

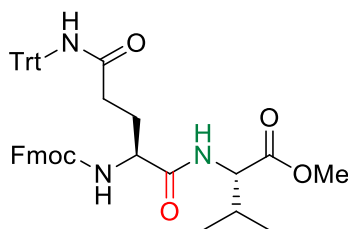

(S)-methyl 2-(((S)-2-((((9H-fluoren-9-yl)methoxy)carbonyl)amino)-5-oxo-5-(tritylamino)pentanamido)-3-methylbutanoate (**3p**)

White solid; Yield 87%; M.p. 102-106 °C;  $[\alpha]_D^{25} = +224.60$  (c 1.0,  $CH_3OH$ );  $^1H$  NMR (400 MHz,  $DMSO-d_6$ )  $\delta$  8.58 (s, 1H), 8.05 (d,  $J = 8.2$  Hz, 1H), 7.90 (d,  $J = 7.5$  Hz, 2H), 7.73 (d,  $J = 7.4$  Hz, 2H), 7.48 – 7.38 (m, 3H), 7.35 – 7.16 (m, 18H), 4.31 – 4.15 (m, 4H), 4.10 - 4.04 (m, 1H), 3.60 (s, 3H), 2.46 – 2.35 (m, 1H), 2.34 – 2.25 (m, 1H), 2.08 – 1.98 (m, 1H), 1.86 – 1.79 (m, 1H), 1.72 – 1.64 (m, 1H), 0.85 (dd,  $J = 6.7, 4.4$  Hz, 7H).  $^{13}C$  NMR (101 MHz,  $DMSO-d_6$ )  $\delta$  172.5, 172.4, 171.9, 156.3, 145.3, 144.2 (2), 141.1, 128.9, 128.1, 127.9, 127.5, 126.8, 125.7, 120.6, 69.6, 66.0, 57.7, 54.4, 52.1, 47.1, 33.3, 30.3, 28.4, 19.3, 18.5; HRMS (ESI-TOF)  $m/z$ :  $[M+H]^+$   
 Calcd for  $C_{45}H_{46}N_3O_6$  724.3387, found 724.3328.

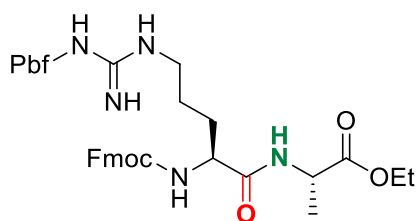

(S)-ethyl 2-(((S)-2-((((9H-fluoren-9-yl)methoxy)carbonyl)amino)-5-(3-((2,2,4,6,7-pentamethyl-2,3-dihydrobenzofuran-5-yl)sulfonyl)guanidino)pentanamido)propanoate (**3q**)

White solid; Yield 81%; M.p. 84-96 °C;  $[\alpha]_D^{25} = -25.48$  (c 1.0,  $CH_3OH$ );  $^1H$  NMR (400 MHz,  $DMSO-d_6$ )  $\delta$  9.37 (s, 1H), 7.90 (d,  $J = 7.5$  Hz, 1H), 7.69 (dd,  $J = 23.1, 7.5$  Hz, 4H), 7.44 – 7.32 (m, 5H), 4.44 – 4.16 (m, 6H), 4.07 – 3.94 (m, 2H), 3.62 – 3.55 (m, 1H), 3.00 (s, 3H), 2.55 (s, 1H), 2.48 (s, 3H), 2.44 (s, 3H), 2.03 (s, 6H), 1.93 – 1.65 (m, 5H), 1.42 (s, 6H), 1.29 – 1.12 (m,

3H).  $^{13}\text{C}$  NMR (101 MHz,  $\text{DMSO-}d_6$ )  $\delta$  176.1, 158.7, 156.5, 154.4, 144.2 (2), 141.2, 138.4, 132.5, 128.1, 127.5, 125.6, 125.2, 120.6, 117.2, 87.2, 66.1, 60.2, 52.8, 47.0, 43.7, 42.7, 28.7, 25.2, 20.2, 19.3, 18.1, 12.7; HRMS (ESI-TOF)  $m/z$ :  $[\text{M}+\text{H}]^+$  Calcd for  $\text{C}_{39}\text{H}_{50}\text{N}_5\text{O}_8\text{S}$  748.3380, found 748.3332.

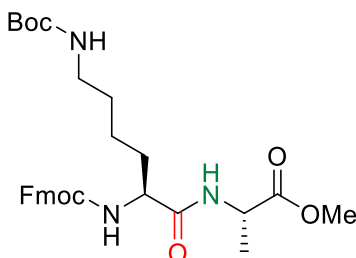

(S)-methyl 2-((S)-2-(((9H-fluoren-9-yl)methoxy)carbonyl)amino)-6-((tert-butoxycarbonyl)amino)hexanamido)propanoate (**3r**)

White solid; Yield 88%; M.p. 103-110 °C;  $[\alpha]_D^{25} = -52.60$  (c 1.0,  $\text{CH}_3\text{OH}$ );  $^1\text{H}$  NMR (400 MHz,  $\text{DMSO-}d_6$ )  $\delta$  8.34 (d,  $J = 8\text{Hz}$ , 1H), 7.89 (d,  $J = 8\text{Hz}$ , 2H), 7.73 (dd,  $J = 8\text{Hz}$ , 2H), 7.47-7.30 (m, 6H), 4.28-4.20 (m, 4H), 4.03-3.97 (m, 1H), 3.61 (s, 3H), 2.91-2.85 (m, 2H), 1.64-1.51 (m, 4H), 1.36 (s, 9H), 1.28 (d,  $J = 8\text{Hz}$ , 3H), 1.22-1.10 (m, 2H);  $^{13}\text{C}$  NMR (101 MHz,  $\text{DMSO-}d_6$ )  $\delta$  172.9, 171.9, 155.8, 155.5, 143.8, 143.7, 140.6, 127.6, 127.0, 125.3, 120.0, 77.3, 65.5, 54.1, 51.7, 47.4, 46.6, 31.6, 29.2, 28.2, 22.7, 16.8; HRMS (ESI-TOF)  $m/z$ :  $[\text{M}+\text{H}]^+$  Calcd for  $\text{C}_{30}\text{H}_{40}\text{N}_3\text{O}_7$  554.2866, found 554.2823.

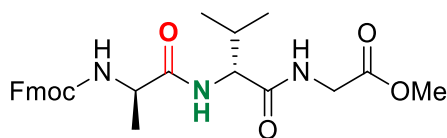

(5R,8R)-methyl 1-(9H-fluoren-9-yl)-8-isopropyl-5-methyl-3,6,9-trioxo-2-oxa-4,7,10-triazadodecan-12-oate (**6a**)

White solid; Yield 92%; M.p. 188-192 °C;  $[\alpha]_D^{25} = -187.96$  (c 1.0,  $\text{CH}_3\text{OH}$ );  $^1\text{H}$  NMR (400 MHz,  $\text{DMSO-}d_6$ )  $\delta$  8.45 (s, 1H), 7.87 (dd,  $J = 18.5, 7.5\text{ Hz}$ , 3H), 7.72 (t,  $J = 6.9\text{ Hz}$ , 2H), 7.58 (d,  $J = 7.8\text{ Hz}$ , 1H), 7.42 (t,  $J = 7.2\text{ Hz}$ , 2H), 7.36 (dd,  $J = 10.8, 4.3\text{ Hz}$ , 2H), 4.28 – 4.12 (m, 5H), 3.88 – 3.82 (m, 2H), 3.61 (s, 3H), 2.00 – 1.95 (m, 1H), 1.21 (d,  $J = 7.1\text{ Hz}$ , 3H), 0.88 – 0.83 (m, 6H).  $^{13}\text{C}$  NMR (101 MHz,  $\text{DMSO-}d_6$ )  $\delta$  175.9, 171.8, 170.6, 143.0, 141.1, 139.8, 129.4, 127.7,

121.8, 120.5, 110.2, 66.0, 57.7, 52.0, 50.7, 47.0, 31.3, 19.5, 18.3; IR (cm<sup>-1</sup>): 3294, 1734, 1692, 1634, 1538, 736, 552; HRMS (ESI-TOF): m/z [M+H]<sup>+</sup> Calcd for C<sub>26</sub>H<sub>32</sub>N<sub>3</sub>O<sub>6</sub> 482.2291, found 482.2322.

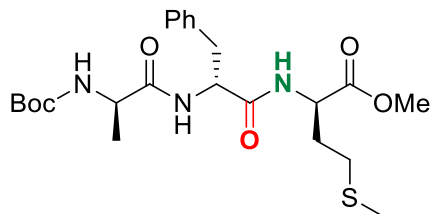

(6R,9R,12R)-methyl 9-benzyl-2,2,6-trimethyl-12-(2-(methylthio)ethyl)-4,7,10-trioxo-3-oxa-5,8,11-triazatridecan-13-oate (**6b**)

White solid; Yield 88%; M.p. 99-103 °C; [ $\alpha$ ]<sub>D</sub><sup>25</sup> = -29.06 (c 1.0, CH<sub>3</sub>OH); <sup>1</sup>H NMR (400 MHz, DMSO-*d*<sub>6</sub>)  $\delta$  8.41 (d, *J* = 4Hz, 1H), 7.79 (d, *J* = 8Hz, 1H), 7.26–7.17 (m, 5H), 6.91 (d, *J* = 8Hz, 1H), 4.58–4.50 (m, 1H), 4.42-4.36 (m, 1H), 3.88 (dd, *J* = 16Hz, *J* = 4Hz, 1H), 3.62 (s, 3H), 3.00 (dd, *J* = 16Hz, *J* = 8Hz, 1H), 2.81 (dd, *J* = 16Hz, *J* = 8Hz, 1H), 2.47–2.38 (m, 2H), 2.03 (s, 3H), 1.98 – 1.86 (m, 2H), 1.36 (s, 9H), 1.07 (d, *J* = 8Hz, 3H); <sup>13</sup>C NMR (101 MHz, DMSO-*d*<sub>6</sub>)  $\delta$  172.3, 171.9, 171.0, 154.9, 137.4, 129.2, 127.9, 126.2, 78.0, 53.2, 51.9, 50.8, 49.8, 37.4, 30.5, 29.3, 28.1, 18.0, 14.5; HRMS (ESI-TOF): m/z [M+H]<sup>+</sup> Calcd for C<sub>23</sub>H<sub>36</sub>N<sub>3</sub>O<sub>6</sub>S 482.2325, found 482.2322.

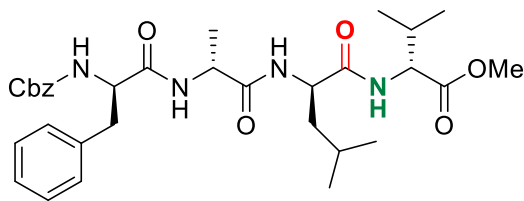

(5R,8R,11R,14S)-methyl 5-benzyl-11-isobutyl-14-isopropyl-8-methyl-3,6,9,12-tetraoxo-1-phenyl-2-oxa-4,7,10,13-tetraazapentadecan-15-oate (**6c**)

White solid; Yield 90%; M.p. 182-194 °C; [ $\alpha$ ]<sub>D</sub><sup>25</sup> = -113.72 (c 1.0, CH<sub>3</sub>OH); <sup>1</sup>H NMR (400 MHz, DMSO-*d*<sub>6</sub>)  $\delta$  8.20 (d, *J* = 7.3 Hz, 1H), 8.07 (d, *J* = 8.1 Hz, 1H), 7.95 (d, *J* = 8.1 Hz, 1H), 7.52 (d, *J* = 8.6 Hz, 1H), 7.40 – 7.12 (m, 10H), 4.93 (s, 1H), 4.44 – 4.24 (m, 3H), 4.20 - 4.13 (m, 2H), 3.62 (s, 1H), 3.00 (dd, *J* = 13.9, 3.3 Hz, 1H), 2.74 – 2.67 (m, 1H), 2.06 – 2.01 (m, 1H), 1.66 – 1.58 (m, 1H), 1.44 (dd, *J* = 14.6, 7.4 Hz, 1H), 1.22 (d, *J* = 7.0 Hz, 3H), 0.89 – 0.85 (m, 12H).



$^{13}\text{C}$  NMR (101 MHz,  $\text{DMSO-}d_6$ )  $\delta$  172.7, 172.3, 171.7, 156.3, 138.6, 137.4, 129.8, 129.6, 128.7, 128.4, 128.4, 128.1, 127.8, 126.6, 65.6, 57.7, 56.4, 52.1, 51.2, 48.4, 41.2, 30.3, 24.5, 23.5, 22.6, 22.2, 19.3, 18.6, 18.5; IR ( $\text{cm}^{-1}$ ): 3285, 2962, 1742, 1697, 1634, 1537, 696, 454; HRMS (ESI-TOF):  $m/z$   $[\text{M}+\text{H}]^+$  Calcd for  $\text{C}_{32}\text{H}_{45}\text{N}_4\text{O}_7$  597.3288, found 597.3283.

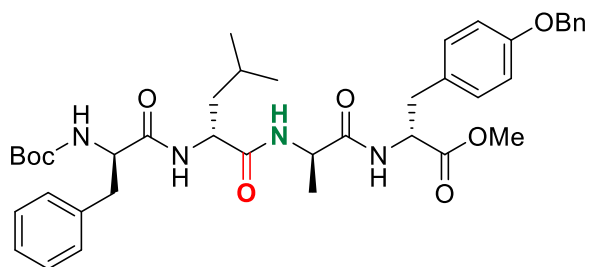

(6R,9R,12R,15R)-methyl 6-benzyl-15-(4-(benzyloxy)benzyl)-9-isobutyl-2,2,12-trimethyl-4,7,10,13-tetraoxo-3-oxa-5,8,11,14-tetraazahexadecan-16-oate (**6d**)

White solid; Yield 84%; M.p. 189-196 °C;  $[\alpha]_D^{25} = + 25.31$  (c 1.0,  $\text{CH}_3\text{OH}$ );  $^1\text{H}$  NMR (400 MHz,  $\text{DMSO-}d_6$ )  $\delta$  8.29 (d,  $J = 8\text{Hz}$ , 1H), 8.07 (d,  $J = 8\text{Hz}$ , 1H), 7.99 (d,  $J = 8\text{Hz}$ , 1H), 7.43–7.11 (m, 12H), 6.92 (dd,  $J = 16\text{Hz}$ ,  $J = 8\text{Hz}$ , 3H), 5.04 (s, 2H), 4.40–4.24 (m, 3H), 4.18–4.12 (m, 1H), 3.54 (s, 3H), 2.98–2.84 (m, 3H), 2.71 (dd,  $J = 12\text{Hz}$ ,  $J = 12\text{Hz}$ , 1H), 1.64–1.57 (m, 1H), 1.44 (d,  $J = 4\text{Hz}$ , 2H), 1.28 (s, 9H), 1.18 (d,  $J = 4\text{Hz}$ , 3H), 0.84 (dd,  $J = 12\text{Hz}$ ,  $J = 8\text{Hz}$ , 6H);  $^{13}\text{C}$  NMR (101 MHz,  $\text{DMSO-}d_6$ )  $\delta$  172.1, 171.7, 171.4 (2), 157.0, 155.2, 138.2, 137.1, 130.1, 129.1, 129.0, 128.3, 127.9, 127.7, 127.6, 126.0, 114.5, 78.0, 69.0, 55.7, 53.8, 51.7, 50.7, 47.8, 40.9, 37.1, 35.7, 28.0, 23.9, 23.1, 21.5, 18.1; HRMS (ESI-TOF):  $m/z$   $[\text{M}+\text{Na}]^+$  Calcd for  $\text{C}_{40}\text{H}_{52}\text{N}_4\text{NaO}_8$  739.3683, found 739.3678.

### Procedure for synthesis of amides:

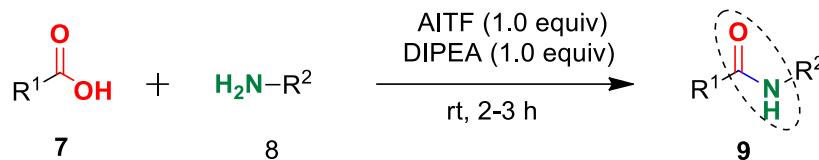

AITF (1.0 equiv) was added to a stirred solution of carboxylic acid/*N*<sup>α</sup>-protected amino acid **7** (1.0 equiv) and DIPEA (1.0 equiv) in CH<sub>3</sub>CN (3 mL) at room temperature. Then the reaction mixture was stirred for 20 min and amine (1.2 equiv) was added and the reaction mixture was stirred for 2.0 h at room temperature. The progress of the reaction was monitored by TLC. Thereafter, the reaction mixture was concentrated using rotary evaporator and then diluted with 15 mL of ethyl acetate and washed with 5% HCl (10 mL x 2) 5% Na<sub>2</sub>CO<sub>3</sub> (10 mL x 2), saturated NaCl solution and dried over anhydrous Na<sub>2</sub>SO<sub>4</sub>. The solvent was removed in vacuo, and the resulting crude product was purified by silica gel column chromatography using the mixture of hexane and ethyl acetate as eluents to afford **9**.

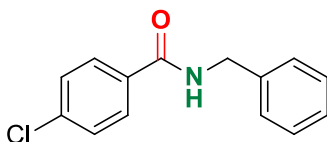

#### N-benzyl-4-chlorobenzamide (**9a**)

White solid; Yield 95%; M.p. 38-46 °C; <sup>1</sup>H NMR (400 MHz, DMSO-*d*<sub>6</sub>) δ 9.14 (t, *J* = 8Hz, 1H), 7.93-7.90 (m, 2H), 7.57-7.54 (m, 2H), 7.35-7.22 (m, 5H), 4.48 (d, *J* = 4Hz, 2H); <sup>13</sup>C NMR (101 MHz, DMSO-*d*<sub>6</sub>) δ 165.1, 139.4, 136.0, 133.0, 129.1, 128.3, 128.2, 127.2, 126.7, 42.6; IR (cm<sup>-1</sup>) 3311, 3029, 1637, 1549, 761, 523; HRMS (ESI-TOF): *m/z* [M+H]<sup>+</sup> Calcd for C<sub>14</sub>H<sub>13</sub>ClNO 246.0686, found 246.0677.

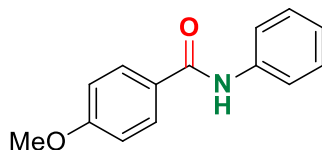

4-methoxy-N-phenylbenzamide (**9b**)

White solid; Yield 90%; M.p. 170-172 °C; <sup>1</sup>H NMR (400 MHz, DMSO-*d*<sub>6</sub>) δ 10.10 (s, 1H), 7.98-7.95 (m, 2H), 7.77 (d, *J* = 8Hz, 2H), 7.34 (dd, *J* = 8Hz, *J* = 8Hz, 2H), 7.10-7.04 (m, 3H), 3.84 (s, 3H); <sup>13</sup>C NMR (101 MHz, DMSO-*d*<sub>6</sub>) δ 164.8, 161.8, 139.3, 129.5, 128.5, 126.9, 123.3, 120.3, 113.5, 55.3; IR (cm<sup>-1</sup>) 3335, 3015, 1653, 1594, 750, 578; HRMS (ESI-TOF): *m/z* [M+Na]<sup>+</sup> Calcd for C<sub>14</sub>H<sub>13</sub>NNaO<sub>2</sub> 250.0844, found 250.0823.

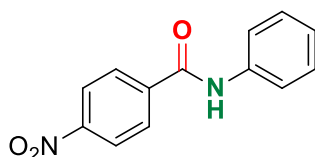

4-nitro-N-phenylbenzamide (**9c**)

Yellow solid; Yield 84%; M.p. 207-210 °C; <sup>1</sup>H NMR (400 MHz, DMSO-*d*<sub>6</sub>) δ 10.57 (s, 1H), 8.37 (t, *J* = 8Hz, 2H), 8.18 (d, *J* = 8Hz, 2H), 7.78 (d, *J* = 8Hz, 2H), 7.38 (t, *J* = 8Hz, 2H), 7.14 (t, *J* = 8Hz, 1H); <sup>13</sup>C NMR (101 MHz, DMSO-*d*<sub>6</sub>) δ 163.8, 149.1, 140.6, 138.6, 129.1, 128.7, 124.1, 123.5, 120.4; IR (cm<sup>-1</sup>) 3320, 3083, 1650, 1515, 757, 585; HRMS (ESI-TOF): *m/z* [M+H]<sup>+</sup> Calcd for C<sub>13</sub>H<sub>11</sub>N<sub>2</sub>O<sub>3</sub> 243.0770, found 243.0770.

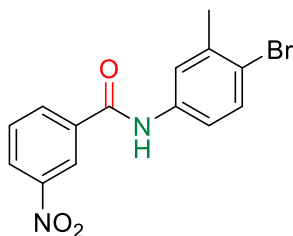

N-(4-bromo-3-methylphenyl)-3-nitrobenzamide (**9d**)

Pale Yellow solid; Yield 86%; M.p. 177-181 °C; <sup>1</sup>H NMR (400 MHz, DMSO-*d*<sub>6</sub>) δ 10.53–10.45 (m, 1H), 8.81 (d, *J* = 1.8 Hz, 1H), 8.37 (d, *J* = 7.7 Hz, 2H), 7.80–7.70 (m, 2H), 7.54–7.41 (m, 2H), 2.34 (s, 3H); <sup>13</sup>C NMR (101 MHz, DMSO-*d*<sub>6</sub>) δ 163.6, 148.1, 138.5, 137.7, 136.4, 134.4,

132.4, 130.3, 126.4, 123.2, 122.8, 120.2, 118.9, 23.1; HRMS (ESI-TOF):  $m/z$   $[M+H]^+$  Calcd for  $C_{14}H_{12}BrN_2O_3$  335.0031, found 335.0026.

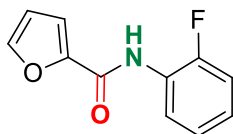

N-(2-fluorophenyl)furan-2-carboxamide (**9e**)

White solid; Yield 92%; M.p. 76-79 °C;  $^1H$  NMR (400 MHz,  $DMSO-d_6$ )  $\delta$  9.95 (s, 1H), 7.94 (dd,  $J = 4Hz$ , 1H), 7.62-7.58 (m, 1H), 7.34-7.19 (m, 4H), 6.70 (dd,  $J = 4Hz$ ,  $J = 4Hz$ , 1H);  $^{13}C$  NMR (101 MHz,  $DMSO-d_6$ )  $\delta$  156.8, 156.2, 154.4, 147.1, 145.8, 126.9 (4), 124.9, 124.8, 124.3, 124.2, 115.8, 115.6, 114.9, 112.1; IR ( $cm^{-1}$ ) 3425, 3142, 1672, 1535, 769, 581; HRMS (ESI-TOF):  $m/z$   $[M+H]^+$  Calcd for  $C_{11}H_9FNO_2$  206.0617, found 206.0612.

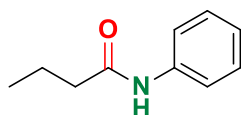

N-phenylbutyramide (**9f**)

White solid; Yield 91%; M.p. 93-95 °C;  $^1H$  NMR (400 MHz,  $DMSO-d_6$ )  $\delta$  9.85 (s, 1H), 7.59 (t,  $J = 8Hz$ , 2H), 7.29-7.25 (m, 2H), 7.03-6.99 (m, 1H), 2.27 (t,  $J = 8Hz$ , 2H), 1.65-1.56 (m, 2H), 0.91 (t,  $J = 8Hz$ , 3H);  $^{13}C$  NMR (101 MHz,  $DMSO-d_6$ )  $\delta$  171.0, 139.3, 128.6, 122.8, 118.9, 38.2, 18.5, 13.6; HRMS (ESI-TOF):  $m/z$   $[M+H]^+$  Calcd for  $C_{10}H_{14}NO$  164.1075, found 164.1062.

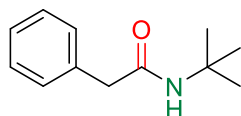

N-(tert-butyl)-2-phenylacetamide (**9g**)

White solid; Yield 92%; M.p. 106-109 °C;  $^1H$  NMR (400 MHz,  $DMSO-d_6$ )  $\delta$  7.65 (s, 1H), 7.32 – 7.19 (m, 5H), 3.36 (s, 2H), 1.26 (s, 9H);  $^{13}C$  NMR (101 MHz,  $DMSO-d_6$ )  $\delta$  169.5, 136.9, 128.8,



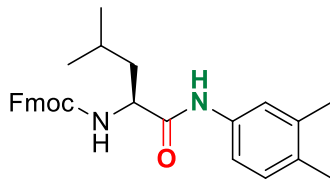

(9H-fluoren-9-yl)methyl (S)-1-((3,4-dimethylphenyl)amino)-4-methyl-1-oxopentan-2-yl)carbamate (**9j**)

White solid; Yield 87%; M.p. 150-154 °C;  $[\alpha]_D^{25} = -79.73$  (c 1.0, CH<sub>3</sub>OH); <sup>1</sup>H NMR (400 MHz, DMSO-*d*<sub>6</sub>) δ 9.81 (s, 1H), 7.89 (d, *J* = 8Hz, 2H), 7.73 (d, *J* = 4Hz, 2H), 7.58 (d, *J* = 8Hz, 1H), 7.41-7.32 (m, 6H), 7.04 (d, *J* = 8Hz, 1H), 4.30-4.20 (m, 4H), 2.17 (d, *J* = 8Hz, 6H), 1.68-1.55 (m, 2H), 1.49-1.42 (m, 1H), 0.90 (t, *J* = 4Hz, 6H) <sup>13</sup>C NMR (101 MHz, DMSO-*d*<sub>6</sub>) δ 171.1, 155.9, 143.8, 143.7, 140.7, 136.6, 136.1, 130.9, 129.4, 127.6, 127.0, 125.2, 120.5, 120.0, 116.8, 65.5, 53.7, 46.6, 40.6, 24.2, 22.9, 21.4, 19.5, 18.7; IR (cm<sup>-1</sup>) 3292, 3065, 2956, 1684, 1284, 737, 680; HRMS (ESI-TOF): *m/z* [M+H]<sup>+</sup> Calcd for C<sub>29</sub>H<sub>33</sub>N<sub>2</sub>O<sub>3</sub> 457.2491, found 457.2487.

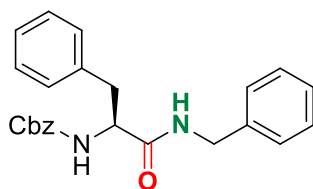

(S)-benzyl (1-(benzylamino)-1-oxo-3-phenylpropan-2-yl)carbamate (**9k**)

White solid; Yield 90%; M.p. 146-150 °C;  $[\alpha]_D^{25} = +2.38$  (c 1.0, CH<sub>3</sub>OH); <sup>1</sup>H NMR (400 MHz, DMSO-*d*<sub>6</sub>) δ 8.43 (t, *J* = 8Hz, 1H), 7.52 (d, *J* = 8Hz, 1H), 7.34-7.17 (m, 15H), 4.95 (s, 2H), 7.31-7.25 (m, 3H), 3.00 (dd, *J* = 12Hz, *J* = 4Hz, 1H), 2.79 (dd, *J* = 12Hz, *J* = 12Hz, 1H); <sup>13</sup>C NMR (101 MHz, CDCl<sub>3</sub>) δ 171.3, 155.8, 139.1, 138.0, 137.0, 129.1, 128.2 (2), 128.0, 127.6, 127.4, 127.0, 126.6, 126.2, 65.2, 56.3, 42.0, 37.6; HRMS (ESI-TOF): *m/z* [M+Na]<sup>+</sup> Calcd for C<sub>24</sub>H<sub>24</sub>N<sub>2</sub>NaO<sub>3</sub> 411.1685, found 411.1692.

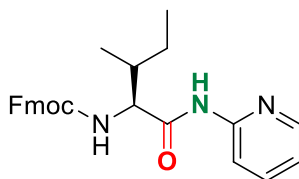

(9H-fluoren-9-yl)methyl ((2S,3R)-3-methyl-1-oxo-1-(pyridin-2-ylamino)pentan-2-yl)carbamate  
**(9l)**

White solid; Yield 87 %; M.p. 150-153 °C;  $[\alpha]_D^{25} = -30.81$  (c 1.0, CH<sub>3</sub>OH); <sup>1</sup>H NMR (400 MHz, DMSO-*d*<sub>6</sub>)  $\delta$  10.44 (s, 1H), 8.32 (d, *J* = 4Hz, 1H), 8.09 (d, *J* = 8Hz, 1H), 7.88 (d, *J* = 8Hz, 2H), 7.80-7.72 (m, 3H), 7.60 (d, *J* = 12Hz, 1H), 7.40 (dd, *J* = 8Hz, *J* = 8Hz, 2H), 7.30 (dd, *J* = 16Hz, *J* = 4Hz, 2H), 7.11 (t, *J* = 8Hz, 1H), 4.30-4.19 (m, 4H), 1.86-1.80 (m, 1H), 1.53-1.46 (m, 1H), 1.24-1.15 (m, 1H), 0.89-0.82 (m, 6H); <sup>13</sup>C NMR (101 MHz, DMSO-*d*<sub>6</sub>)  $\delta$  171.5, 156.1, 151.6, 147.9, 143.7, 140.6, 138.1, 127.6, 127.0, 125.2, 120.0, 119.5, 113.5, 65.6, 59.7, 46.6, 36.1, 24.4, 15.2, 10.7; IR (cm<sup>-1</sup>) 3253, 3206, 2964, 1725, 1298, 780, 534; HRMS (ESI-TOF): *m/z* [M+H]<sup>+</sup> Calcd for C<sub>26</sub>H<sub>28</sub>N<sub>3</sub>O<sub>3</sub> 430.2131, found 430.2126.

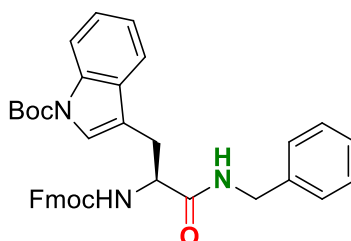

(S)-tert-butyl 3-(2-((((9H-fluoren-9-yl)methoxy)carbonyl)amino)-3-(benzylamino)-3-oxopropyl)-1H-indole-1-carboxylate **(9m)**

White solid; Yield 90%; M.p. 153-155 °C;  $[\alpha]_D^{25} = -84.04$  (c 1.0, CH<sub>3</sub>OH); <sup>1</sup>H NMR (400 MHz, DMSO-*d*<sub>6</sub>)  $\delta$  8.64 (t, *J* = 4Hz, 1H), 8.04 (d, *J* = 8Hz, 1H), 7.87-7.76 (m, 4H), 7.62 (dd, *J* = 12Hz, *J* = 4Hz, 2H), 7.39-7.17 (m, 12H), 4.45-4.38 (m, 1H), 4.31 (brs, 2H), 4.23-4.10 (m, 3H), 3.13 (dd, *J* = 16Hz, *J* = 4Hz, 1H), 3.00 (dd, *J* = 12Hz, *J* = 12Hz, 1H), 1.56 (s, 9H); <sup>13</sup>C NMR (101 MHz, DMSO-*d*<sub>6</sub>)  $\delta$  171.3, 155.8, 149.0, 143.7, 143.6, 140.6 (2), 139.1, 134.6, 130.2, 128.1, 127.5, 127.0, 126.6, 125.3, 125.2, 124.2, 124.1, 122.4, 120.0, 119.5, 116.7, 114.6, 83.4, 65.7, 54.6, 46.5, 42.1, 27.6, 27.4; HRMS (ESI-TOF): *m/z* [M+H]<sup>+</sup> Calcd for C<sub>38</sub>H<sub>38</sub>N<sub>3</sub>O<sub>5</sub> 616.2811, found 616.2769.

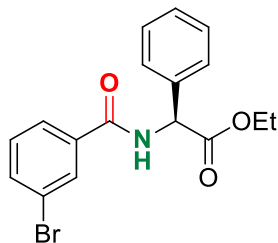

(S)-ethyl 2-(3-bromobenzamido)-2-phenylacetate (**9n**)

White solid; Yield 86%; M.p. 98-102 °C;  $[\alpha]_{\text{D}}^{25} = +47.50$  (c 1.0, CH<sub>3</sub>OH); <sup>1</sup>H NMR (400 MHz, DMSO-*d*<sub>6</sub>) δ 9.29 (d, *J* = 4Hz, 1H), 8.12 (s, 1H), 7.91 (d, *J* = 8Hz, 1H), 7.77-7.74 (m, 1H), 7.48-7.37 (m, 6H), 5.62 (d, *J* = 8Hz, 1H), 4.18-4.10 (m, 2H), 1.16-1.17 (m, 3H); <sup>13</sup>C NMR (101 MHz, DMSO-*d*<sub>6</sub>) δ 170.3, 165.0, 135.9, 135.6, 134.2, 130.5, 130.2, 128.5, 128.4, 128.2, 127.7, 126.9, 121.5, 60.9, 57.1, 13.9; HRMS (ESI-TOF): *m/z* [M+Na]<sup>+</sup> Calcd for C<sub>17</sub>H<sub>16</sub>BrNNaO<sub>3</sub> 384.0211, found 384.0206.

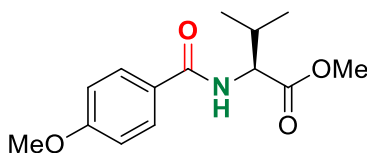

(S)-methyl 2-(4-methoxybenzamido)-3-methylbutanoate (**9o**)

White solid; Yield 86%; M.p. 100.7-101.1 °C;  $[\alpha]_{\text{D}}^{25} = -2.49$  (c 1.0, CH<sub>3</sub>OH); <sup>1</sup>H NMR (400 MHz, CDCl<sub>3</sub>) δ 7.78-7.75 (m, 2H), 6.94-6.90 (m, 2H), 6.52 (d, *J* = 8Hz, 1H), 4.76 (dd, *J* = 8Hz, *J* = 4Hz, 1H), 3.84 (s, 3H), 3.76 (s, 3H), 2.29-2.21 (m, 1H), 0.98 (dd, *J* = 8Hz, *J* = 8Hz, 6H); <sup>13</sup>C NMR (101 MHz, CDCl<sub>3</sub>) δ 172.9, 166.8, 162.4, 128.9, 126.4, 113.8, 57.4, 55.5, 52.3, 31.7, 19.0, 18.0; HRMS (ESI-TOF): *m/z* [M+Na]<sup>+</sup> Calcd for C<sub>14</sub>H<sub>19</sub>NNaO<sub>4</sub> 288.1212, found 288.1200.

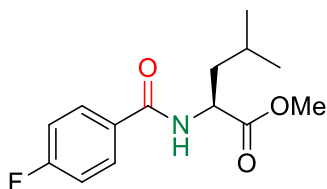

(S)-methyl 2-(4-fluorobenzamido)-4-methylpentanoate (**9p**)



White solid; M.p. 97-100°C;  $[\alpha]_{\text{D}}^{25} = -18.57$  (c 1.0, CH<sub>3</sub>OH); <sup>1</sup>H NMR (400 MHz, DMSO-*d*<sub>6</sub>)  $\delta$  8.76 (d, *J* = 7.6 Hz, 1H), 7.97 (dd, *J* = 8.2, 5.8 Hz, 2H), 7.31 (t, *J* = 8.5 Hz, 2H), 4.53-4.48 (m, 1H), 3.65 (s, 3H), 1.82-1.75 (m, 1H), 1.72-1.66 (m, 1H), 1.61-1.54 (m, 1H), 0.90 (dd, *J* = 18.2, 6.5 Hz, 6H); <sup>13</sup>C NMR (101 MHz, DMSO-*d*<sub>6</sub>)  $\delta$  173.5, 166.0, 165.7, 163.2, 130.6, 130.5, 115.7, 115.5, 52.3, 51.4, 39.6, 24.9, 23.2, 21.5; IR (cm<sup>-1</sup>) 3276, 3076, 2957, 1745, 1273, 766, 503; HRMS (ESI-TOF): *m/z* [M+H]<sup>+</sup> Calcd for C<sub>14</sub>H<sub>19</sub>FNO<sub>3</sub> 268.1349, found 268.1345.

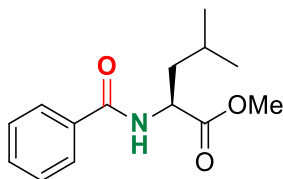

(S)-methyl 2-benzamido-4-methylpentanoate (**9q**)

White solid; Yield 89%; M.p. 102-104 °C;  $[\alpha]_{\text{D}}^{25} = -18.08$  (c 1.0, CH<sub>3</sub>OH); <sup>1</sup>H NMR (400 MHz, DMSO-*d*<sub>6</sub>)  $\delta$  8.70 (d, *J* = 8Hz, 1H), 7.89-7.87 (m, 2H), 7.57-7.46 (m, 3H), 4.53-4.48 (m, 1H), 3.64 (s, 3H), 1.83-1.76 (m, 1H), 1.73-1.66 (m, 1H), 1.61-1.54 (m, 1H), 0.90 (dd, *J* = 16Hz, *J* = 8Hz, 6H); <sup>13</sup>C NMR (101 MHz, DMSO-*d*<sub>6</sub>)  $\delta$  173.0, 166.5, 133.7, 131.4, 128.2, 127.4, 51.8, 50.9, 39.2, 24.4, 22.8, 21.1; HRMS (ESI-TOF): *m/z* [M+H]<sup>+</sup> Calcd for C<sub>14</sub>H<sub>20</sub>NO<sub>3</sub> 250.1443, found 250.1429.

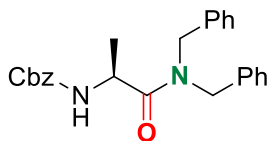

(S)-benzyl (1-(dibenzylamino)-1-oxopropan-2-yl)carbamate (**11a**)

White solid; Yield 88%; M.p. 82-88 °C;  $[\alpha]_{\text{D}}^{25} = -69.44$  (c 1.0, CH<sub>3</sub>OH); <sup>1</sup>H NMR (400 MHz, DMSO-*d*<sub>6</sub>)  $\delta$  7.72 (d, *J* = 8Hz, 1H), 7.39-7.15 (m, 15H), 5.03 (s, 2H), 4.65-4.48 (m, 4H), 4.29 (d, *J* = 16Hz, 1H), 1.20 (d, *J* = 4Hz, 3H); <sup>13</sup>C NMR (101 MHz, DMSO-*d*<sub>6</sub>)  $\delta$  173.0, 155.8, 137.3, 137.0, 136.9, 128.6, 128.4, 128.3, 128.0, 127.7, 127.6, 127.3 (2), 126.9, 65.3, 49.4, 47.7, 46.7, 17.5; IR (cm<sup>-1</sup>) 3290, 2982, 1716, 1645, 729, 578; HRMS (ESI-TOF): *m/z* [M+H]<sup>+</sup> Calcd for C<sub>25</sub>H<sub>27</sub>N<sub>2</sub>O<sub>3</sub> 403.2022, found 403.2027.

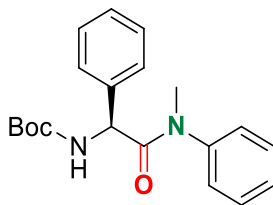

(S)-tert-butyl (2-(methyl(phenyl)amino)-2-oxo-1-phenylethyl)carbamate (**11b**)

Gel; Yield 86%;  $[\alpha]_D^{25} = +164.13$  (c 1.0, CH<sub>3</sub>OH); <sup>1</sup>H NMR (400 MHz, DMSO-*d*<sub>6</sub>) δ 7.38 (d, *J* = 4Hz, 2H), 7.21 (dd, *J* = 28Hz, *J* = 52Hz, 7H), 6.88 (d, *J* = 4Hz, 2H), 5.21 (d, *J* = 8Hz, 1H), 3.15 (s, 3H), 1.35 (s, 9H); <sup>13</sup>C NMR (101 MHz, DMSO-*d*<sub>6</sub>) δ 169.7, 154.7, 142.4, 137.2, 129.4, 128.1, 127.8, 127.6, 78.2, 55.1, 37.4, 28.1; HRMS (ESI-TOF): *m/z* [M+Na]<sup>+</sup> Calcd for C<sub>20</sub>H<sub>24</sub>N<sub>2</sub>NaO<sub>3</sub> 363.1685, found 363.1654.

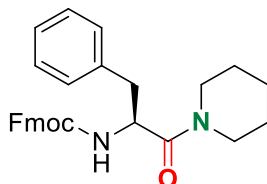

(S)-(9H-fluoren-9-yl)methyl (1-oxo-3-phenyl-1-(piperidin-1-yl)propan-2-yl)carbamate (**11c**)

White solid; Yield 81%; M.p. 99-105°C;  $[\alpha]_D^{25} = -137.64$  (c 1.0, CH<sub>3</sub>OH); <sup>1</sup>H NMR (400 MHz, DMSO-*d*<sub>6</sub>) δ 7.89 (d, *J* = 8Hz, 1H), 7.68 (dd, *J* = 8Hz, *J* = 4Hz, 2H), 7.41 (t, *J* = 8Hz, 2H), 7.34-7.19 (m, 9H), 4.63 (dd, *J* = 12Hz, *J* = 8Hz, 1H), 4.19-4.13 (m, 3H), 2.90 (dd, *J* = 12Hz, *J* = 8Hz, 1H), 2.82 (dd, *J* = 16Hz, *J* = 8Hz, 1H), 1.50-1.33 (m, 6H), 1.26-1.10 (m, 4H); <sup>13</sup>C NMR (101 MHz, DMSO-*d*<sub>6</sub>) δ 169.1, 155.6, 143.7, 140.6, 137.7, 129.3, 128.0, 127.6, 127.0, 126.3, 125.3, 120.0, 65.6, 51.7, 46.5, 45.8, 42.4, 37.5, 25.7, 25.2, 23.9; IR (cm<sup>-1</sup>) 3259, 2932, 1713, 1623, 757, 540; HRMS (ESI-TOF): *m/z* [M+Na]<sup>+</sup> Calcd for C<sub>29</sub>H<sub>30</sub>N<sub>2</sub>NaO<sub>3</sub> 477.2154, found 477.2078.

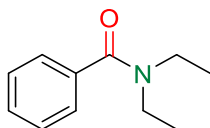

N,N-diethylbenzamide (**11d**)

Colorless oil; Yield 91%; <sup>1</sup>H NMR (400 MHz, DMSO-*d*<sub>6</sub>) δ 7.45-7.33 (m, 5H), 3.46 (s, 2H), 3.17 (s, 2H), 1.08 (d, *J* = 41.7 Hz, 6H); <sup>13</sup>C NMR (101 MHz, DMSO-*d*<sub>6</sub>) δ 170.4, 137.7, 129.3,

128.7, 126.4, 43.2, 39.1, 14.4, 13.2; HRMS (ESI-TOF):  $m/z$   $[M+H]^+$  Calcd for  $C_{11}H_{16}NO$  178.1232, found 178.1238.

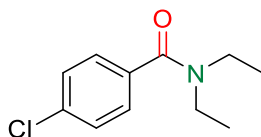

4-chloro-N,N-diethylbenzamide (**11e**)

Colourless oil; Yield 90%;  $^1H$  NMR (400 MHz,  $DMSO-d_6$ )  $\delta$  7.48-7.45 (m, 1H), 7.38-7.36 (m, 1H), 3.41 (s, 2H), 3.16 (s, 2H), 1.08 (d,  $J = 21.0$  Hz, 3H);  $^{13}C$  NMR (101 MHz,  $DMSO-d_6$ )  $\delta$  168.8, 136.0, 133.6, 128.3, 128.0, 42.7, 38.7, 13.8, 12.7; HRMS (ESI-TOF):  $m/z$   $[M+Na]^+$  Calcd for  $C_{11}H_{14}ClNNaO$  234.0662, found 234.0657.

#### Procedure for synthesis of esters:

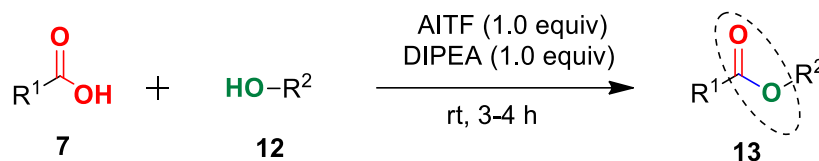

AITF (1.0 equiv) was added to a stirred solution of carboxylic acid/ $N^\alpha$ -protected amino acid **7** (1.0 equiv) and DIPEA (1.0 equiv) in  $CH_3CN$  (3 mL) at room temperature. Then the reaction mixture was stirred for 20 min and alcohol (1.2 equiv) was added and the reaction mixture was stirred for 3.0 h at room temperature. The progress of the reaction was monitored by TLC at room temperature. Thereafter, the reaction mixture was concentrated using rotary evaporator and then diluted with 15 mL of ethyl acetate and washed with 5% HCl (10 mL x 2) 5%  $Na_2CO_3$  (10 mL x 2), saturated NaCl solution and dried over anhydrous  $Na_2SO_4$ . The solvent was removed in vacuo, and the resulting crude product was purified by silica gel column chromatography using the mixture of hexane and ethyl acetate as eluents to afford **13**.

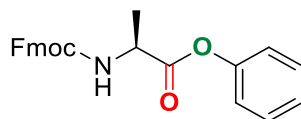

(S)-phenyl 2-(((9H-fluoren-9-yl)methoxy)carbonyl)amino)propanoate (**13a**)

White solid; Yield 87%; M.p. 135-139 °C;  $[\alpha]_D^{25} = + 61.04$  (c 1.0, CH<sub>3</sub>OH); <sup>1</sup>H NMR (400 MHz, DMSO-*d*<sub>6</sub>) δ 8.02 (d, *J* = 4Hz, 1H), 7.89 (d, *J* = 8Hz, 2H), 7.72 (dd, *J* = 8Hz, *J* = 4Hz, 2H), 7.44-7.25 (m, 8H), 7.09 (d, *J* = 8Hz, 1H), 4.41-4.23 (m, 4H), 1.44 (d, *J* = 8Hz, 3H); <sup>13</sup>C NMR (101 MHz, DMSO-*d*<sub>6</sub>) δ 171.8, 155.9, 150.4, 143.7 (2), 140.7, 129.5, 127.6, 127.0, 125.9, 125.1 (2), 121.5, 120.1, 65.6, 49.5, 46.5, 16.7; IR (cm<sup>-1</sup>) 2928, 1762, 1531, 1450, 1302, 1260, 1161, 1064, 757, 690; HRMS (ESI-TOF): *m/z* [M+Na]<sup>+</sup> Calcd for C<sub>24</sub>H<sub>21</sub>NNaO<sub>4</sub> 410.1368, found 410.1384.

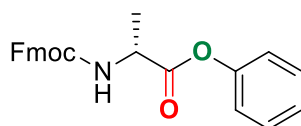

(R)-phenyl 2-(((9H-fluoren-9-yl)methoxy)carbonyl)amino)propanoate (**13a\***)

White solid; Yield 85%; M.p. 134-137.  $[\alpha]_D^{25} = + 486.20$  (c 1.0, CH<sub>3</sub>OH); <sup>1</sup>H NMR (400 MHz, DMSO-*d*<sub>6</sub>) δ 7.99 (d, *J* = 6.8 Hz, 1H), 7.89 (d, *J* = 7.5 Hz, 2H), 7.72 (t, *J* = 8.0 Hz, 2H), 7.44-7.25 (m, 7H), 7.09 (d, *J* = 7.9 Hz, 2H), 4.41-4.23 (m, 4H), 1.45 (d, *J* = 7.2 Hz, 3H); <sup>13</sup>C NMR (101 MHz, DMSO-*d*<sub>6</sub>) δ 171.7, 155.9, 150.4, 143.7 (2), 140.7, 129.5, 127.6, 127.0, 125.9, 125.1 (2), 121.4, 120.1, 65.6, 49.5, 46.6, 16.7; HRMS (ESI-TOF): *m/z* [M+H]<sup>+</sup> Calcd for C<sub>24</sub>H<sub>22</sub>NO<sub>4</sub> 388.1549, found 388.1558.

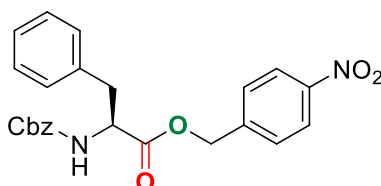

(S)-benzyl (1-((4-nitrobenzyl)amino)-1-oxo-3-phenylpropan-2-yl)carbamate (**13b**)

White solid; Yield 78%; M.p. 102-110 °C;  $[\alpha]_D^{25} = - 8.60$  (c 1.0, CH<sub>3</sub>OH); <sup>1</sup>H NMR (400 MHz, DMSO-*d*<sub>6</sub>) δ 8.19 (d, *J* = 8Hz, 2H), 7.96 (d, *J* = 8Hz, 1H), 7.53 (d, *J* = 8Hz, 2H), 7.33-7.22 (m, 10H), 5.26 (s, 2H), 5.00 (d, *J* = 8Hz, 2H), 4.42-4.36 (m, 1H), 3.09 (dd, *J* = 16Hz, *J* = 4Hz, 1H), 2.94 (dd, *J* = 12Hz, *J* = 12Hz, 1H); <sup>13</sup>C NMR (101 MHz, DMSO-*d*<sub>6</sub>) δ 171.6, 156.0, 147.0,

143.5, 137.2, 136.8, 129.1, 128.2 (2), 127.7, 127.5, 126.5, 123.4, 65.4, 64.7, 55.6, 36.3; IR (cm<sup>-1</sup>) 2921, 1707, 1511, 1450, 1347, 1285, 1035, 1011, 752, 661; HRMS (ESI-TOF): m/z [M+Na]<sup>+</sup> Calcd for C<sub>24</sub>H<sub>22</sub>N<sub>2</sub>NaO<sub>6</sub> 457.1376, found 457.1333.

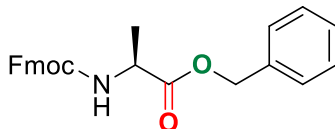

(S)-benzyl 2-(((9H-fluoren-9-yl)methoxy)carbonyl)amino)propanoate (**13c**)

White solid; Yield 84%; M.p. 69-102 °C; [ $\alpha$ ]<sub>D</sub><sup>25</sup> = + 2.08 (c 1.0, CH<sub>3</sub>OH); <sup>1</sup>H NMR (400 MHz, DMSO-*d*<sub>6</sub>)  $\delta$  7.88 (dd, *J* = 12Hz, *J* = 8Hz, 3H), 7.71 (dd, *J* = 4Hz, *J* = 4Hz, 2H), 7.43-7.30 (m, 9H), 5.12 (s, 2H), 4.32-4.14 (m, 4H), 1.31 (d, *J* = 8Hz, 3H); <sup>13</sup>C NMR (101 MHz, DMSO-*d*<sub>6</sub>)  $\delta$  172.7, 155.8, 143.8, 143.7, 140.7, 135.9, 128.3, 127.9, 127.6, 127.0, 125.1 (2), 120.1, 65.8, 65.6, 49.4, 46.5, 16.8; HRMS (ESI-TOF): m/z [M+Na]<sup>+</sup> Calcd for C<sub>25</sub>H<sub>23</sub>NNaO<sub>4</sub> 424.1525, found 424.1490.

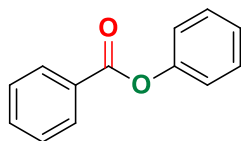

phenyl benzoate (**13d**)

White solid; Yield 89%; M.p. 62-68 °C; <sup>1</sup>H NMR (400 MHz, DMSO-*d*<sub>6</sub>)  $\delta$  8.14 (t, *J* = 8Hz, 2H), 7.35 (t, *J* = 8Hz, 1H), 7.61 (t, *J* = 8Hz, 2H), 7.50-7.45 (m, 2H), 7.31 (dd, *J* = 16Hz, *J* = 8Hz, 3H); <sup>13</sup>C NMR (101 MHz, DMSO-*d*<sub>6</sub>)  $\delta$  164.5, 150.6, 134.0, 129.7, 129.5, 128.9, 126.0, 121.9; IR (cm<sup>-1</sup>) 2982, 1734, 1593, 1471, 1262, 1192, 1062, 811, 747, 689; HRMS (ESI-TOF): m/z [M+Na]<sup>+</sup> Calcd for C<sub>13</sub>H<sub>10</sub>NaO<sub>2</sub> 221.0578, found 221.0576.

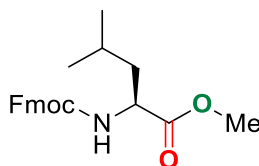

(S)-methyl 2-(((9H-fluoren-9-yl)methoxy)carbonyl)amino)-4-methylpentanoate (**13e**)

White solid; Yield 91%; M.p. 59-64 °C;  $[\alpha]_{\text{D}}^{25} = -29.04$  (c 1.0, CH<sub>3</sub>OH); <sup>1</sup>H NMR (400 MHz, DMSO-*d*<sub>6</sub>) δ 7.89 (d, *J* = 4Hz, 2H), 7.75 (dd, *J* = 28Hz, *J* = 8Hz, 3H), 7.44-7.31 (m, 4H), 4.32-4.21 (m, 3H), 4.08-4.03 (m, 1H), 3.62 (s, 3H), 1.66-1.55 (m, 2H), 1.48-1.42 (m, 1H), 0.86 (dd, *J* = 16Hz, *J* = 8Hz, 6H); <sup>13</sup>C NMR (101 MHz, DMSO-*d*<sub>6</sub>) δ 173.2, 156.0, 143.8, 143.7, 140.7, 127.6, 127.0, 125.2, 120.1, 65.5, 52.1, 51.8, 46.6, 39.4, 24.1, 22.7, 21.0; IR (cm<sup>-1</sup>): 2955, 1751, 1534, 1447, 1263, 1120, 1081, 756, 538; HRMS (ESI-TOF): *m/z* [M+Na]<sup>+</sup> Calcd for C<sub>22</sub>H<sub>25</sub>NNaO<sub>4</sub> 390.1681, found 390.1646.

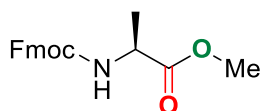

(S)-methyl 2-((((9H-fluoren-9-yl)methoxy)carbonyl)amino)propanoate (**13f**)

White solid; Yield 86%; M.p. 112-114 °C;  $[\alpha]_{\text{D}}^{25} = -390.20$  (c 1.0, CH<sub>3</sub>OH); <sup>1</sup>H NMR (400 MHz, DMSO-*d*<sub>6</sub>) δ 7.89 (d, *J* = 8Hz, 2H), 7.80-7.70 (m, 3H), 7.44-7.32 (m, 4H), 4.35-4.21 (m, 3H), 4.14-4.07 (m, 1H), 3.63 (s, 3H), 1.29 (d, *J* = 8Hz, 3H); <sup>13</sup>C NMR (101 MHz, DMSO-*d*<sub>6</sub>) δ 173.3, 155.8, 143.8, 143.7, 140.7, 127.6, 127.0, 125.1, 120.0, 65.5, 51.8, 49.2, 46.6, 16.9; HRMS (ESI-TOF): *m/z* [M+Na]<sup>+</sup> Calcd for C<sub>19</sub>H<sub>19</sub>NNaO<sub>4</sub> 348.1212, found 348.1232.

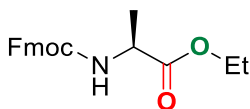

(S)-ethyl 2-((((9H-fluoren-9-yl)methoxy)carbonyl)amino)propanoate (**13g**)

White solid; Yield 89%; M.p. 103-105 °C;  $[\alpha]_{\text{D}}^{25} = -181.08$  (1.0, CH<sub>3</sub>OH); <sup>1</sup>H NMR (400 MHz, DMSO-*d*<sub>6</sub>): δ 7.89 (d, *J* = 8Hz, 2H), 7.77-7.70 (m, 3H), 7.44-7.32 (m, 4H), 4.36-4.21 (m, 3H), 4.11-4.03 (m, 3H), 1.28 (d, *J* = 8Hz, 3H), 1.17 (t, *J* = 4Hz, 3H); <sup>13</sup>C NMR (101 MHz, DMSO-*d*<sub>6</sub>) δ 172.8, 155.8, 143.8, 143.7, 140.7, 127.6, 127.0, 125.2, 125.1, 120.0, 65.5, 60.4, 49.3, 46.6, 16.8, 14.0; IR (cm<sup>-1</sup>) 2982, 1748, 1527, 1449, 1298, 1255, 1179, 1029, 758, 583; HRMS (ESI-TOF): *m/z* [M+Na]<sup>+</sup> Calcd for C<sub>20</sub>H<sub>21</sub>NNaO<sub>4</sub> 362.1368, found 362.1370.

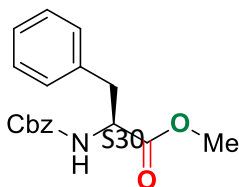

(S)-methyl 2-(((benzyloxy)carbonyl)amino)-3-phenylpropanoate (**13h**)

Colorless oil; Yield 84%;  $[\alpha]_D^{25} = +143.90$  (c 1.0, CH<sub>3</sub>OH); <sup>1</sup>H NMR (400 MHz, DMSO-*d*<sub>6</sub>) δ 7.86 (d, *J* = 8Hz, 1H), 7.37-7.22 (m, 10H), 5.02 (s, 2H), 4.38-4.32 (m, 1H), 3.64 (s, 3H), 3.10 (dd, *J* = 12Hz, *J* = 8Hz, 1H), 2.94 (dd, *J* = 16Hz, *J* = 8Hz, 1H); <sup>13</sup>C NMR (101 MHz, DMSO-*d*<sub>6</sub>) δ 172.3, 155.9, 137.4, 136.9, 129.0, 128.2 (2), 127.7, 127.5, 126.4, 65.4, 55.5, 51.8, 36.5; IR (cm<sup>-1</sup>) 2952, 1707, 1585, 1497, 1349, 1207, 1049, 1027, 742, 696; HRMS (ESI-TOF): *m/z* [M+Na]<sup>+</sup> Calcd for C<sub>18</sub>H<sub>19</sub>NNaO<sub>4</sub> 336.1212, found 336.1185.

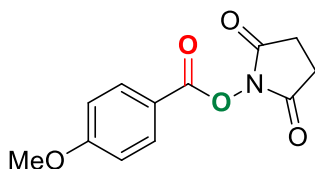

2,5-dioxopyrrolidin-1-yl 4-methoxybenzoate (**13i**)

White solid; Yield 84%; M.p. 138-141 °C; <sup>1</sup>H NMR (400 MHz, DMSO-*d*<sub>6</sub>) δ 8.05 (d, *J* = 8Hz, 2H), 7.17 (d, *J* = 8Hz, 2H), 3.89 (s, 3H), 2.88 (s, 4H); <sup>13</sup>C NMR (101 MHz, DMSO-*d*<sub>6</sub>) δ 170.4, 164.7, 161.2, 132.3, 116.2, 114.8, 55.8, 25.4; IR (cm<sup>-1</sup>) 2981, 1790, 1513, 1426, 1375, 1210, 1071, 1020, 756, 689; HRMS (ESI-TOF): *m/z* [M+Na]<sup>+</sup> Calcd for C<sub>12</sub>H<sub>11</sub>NNaO<sub>5</sub> 272.0535, found 272.0535.

AITF 1H NMR

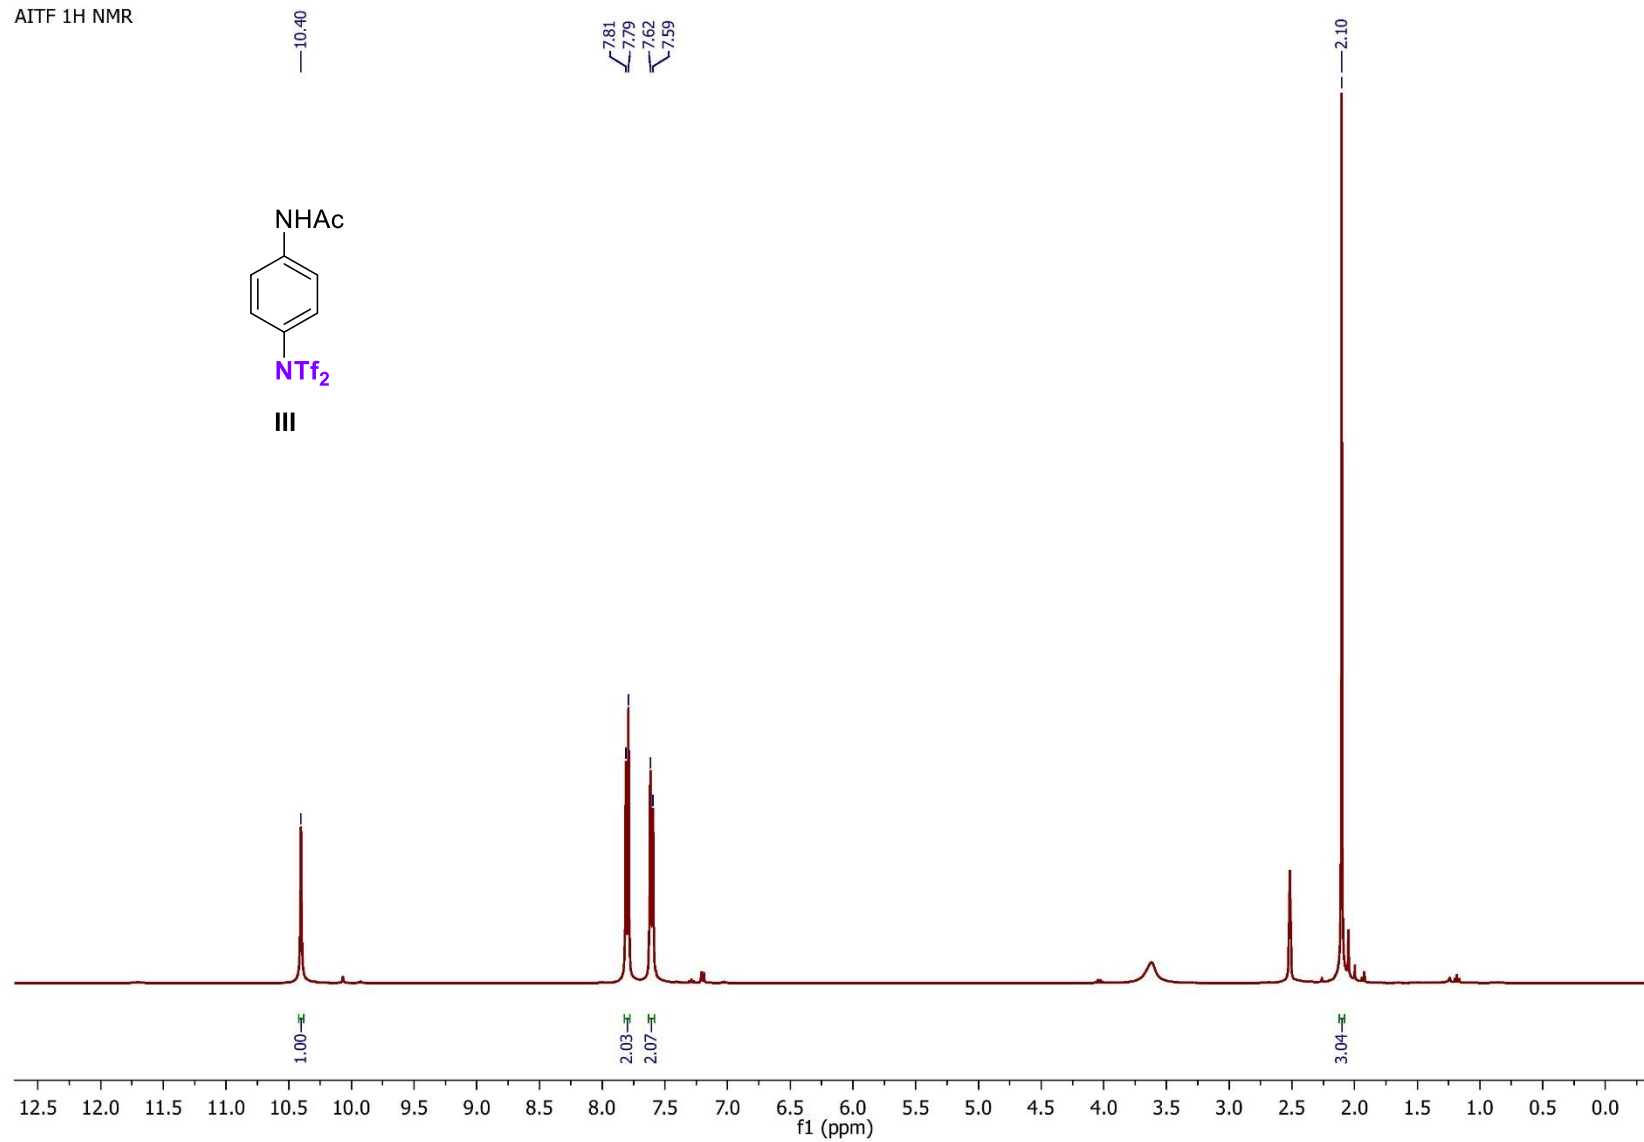

Figure S1. <sup>1</sup>H NMR Spectrum of III (400MHz, DMSO-d<sub>6</sub>)



AITF 13C NMR

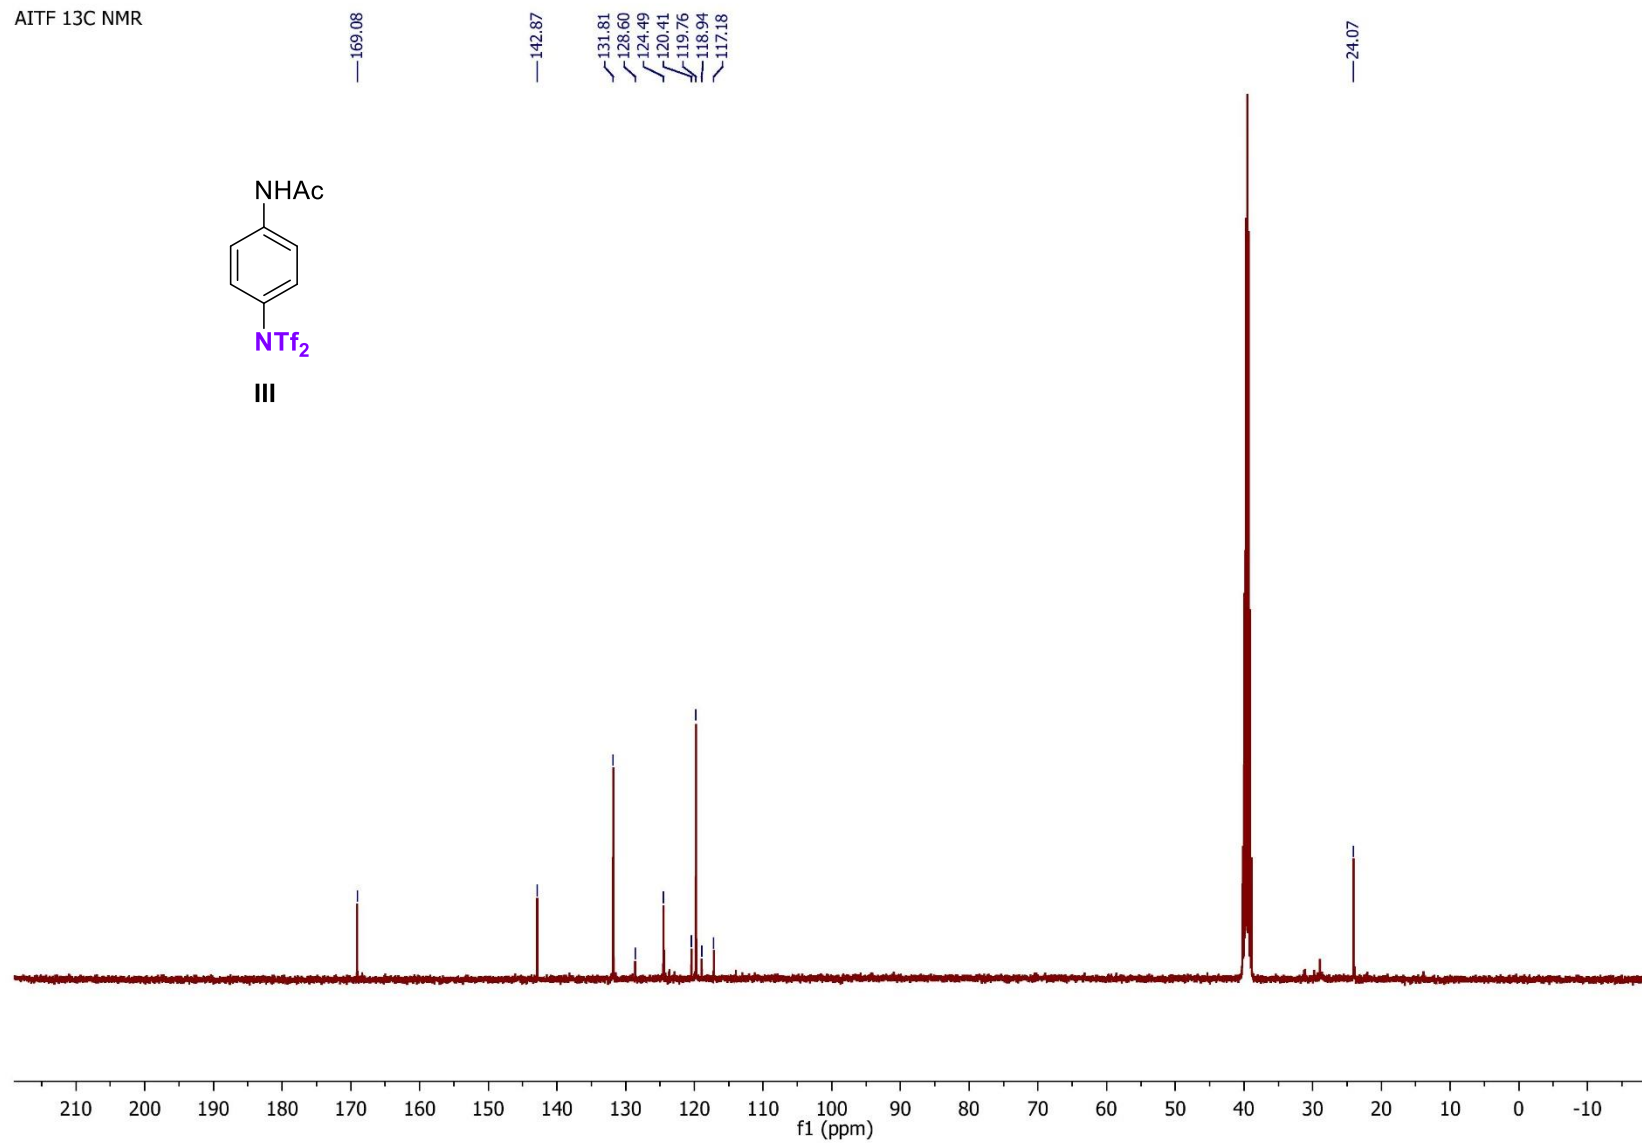

**Figure S2.**  $^{13}\text{C}$  NMR Spectrum of **III** (400MHz, DMSO- $\text{d}_6$ )

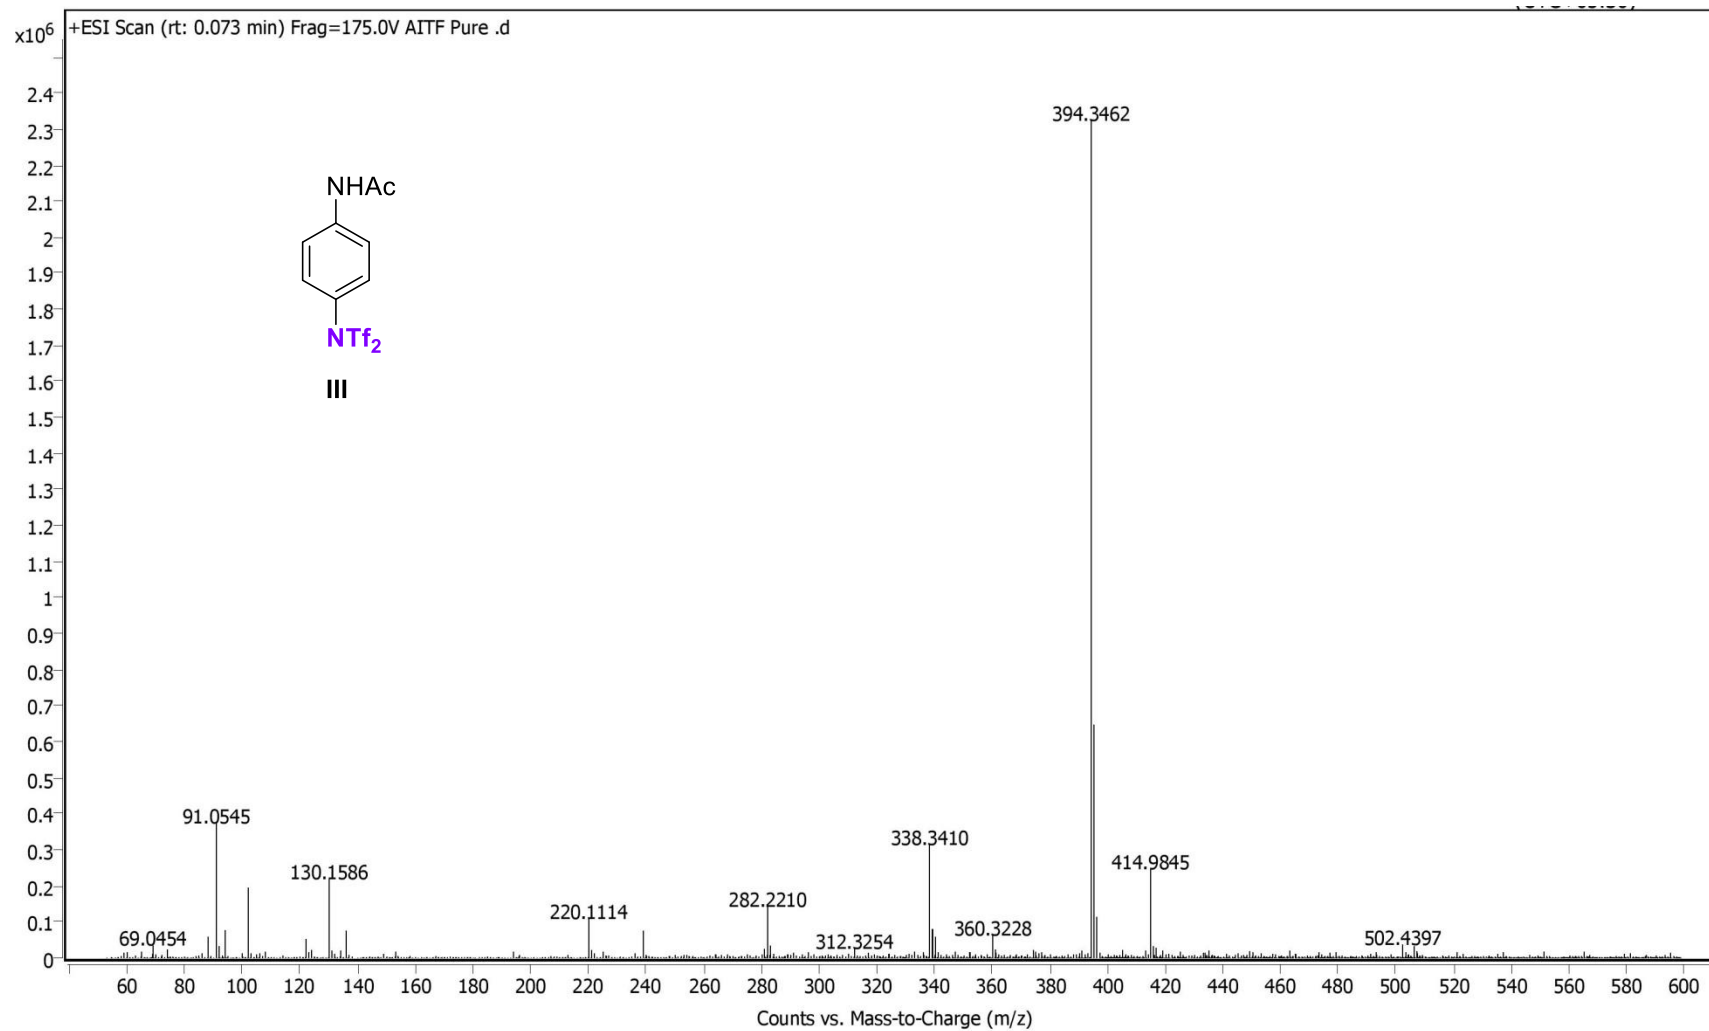

**Figure S3.** HRMS Spectrum of **III** (AITF)

IV

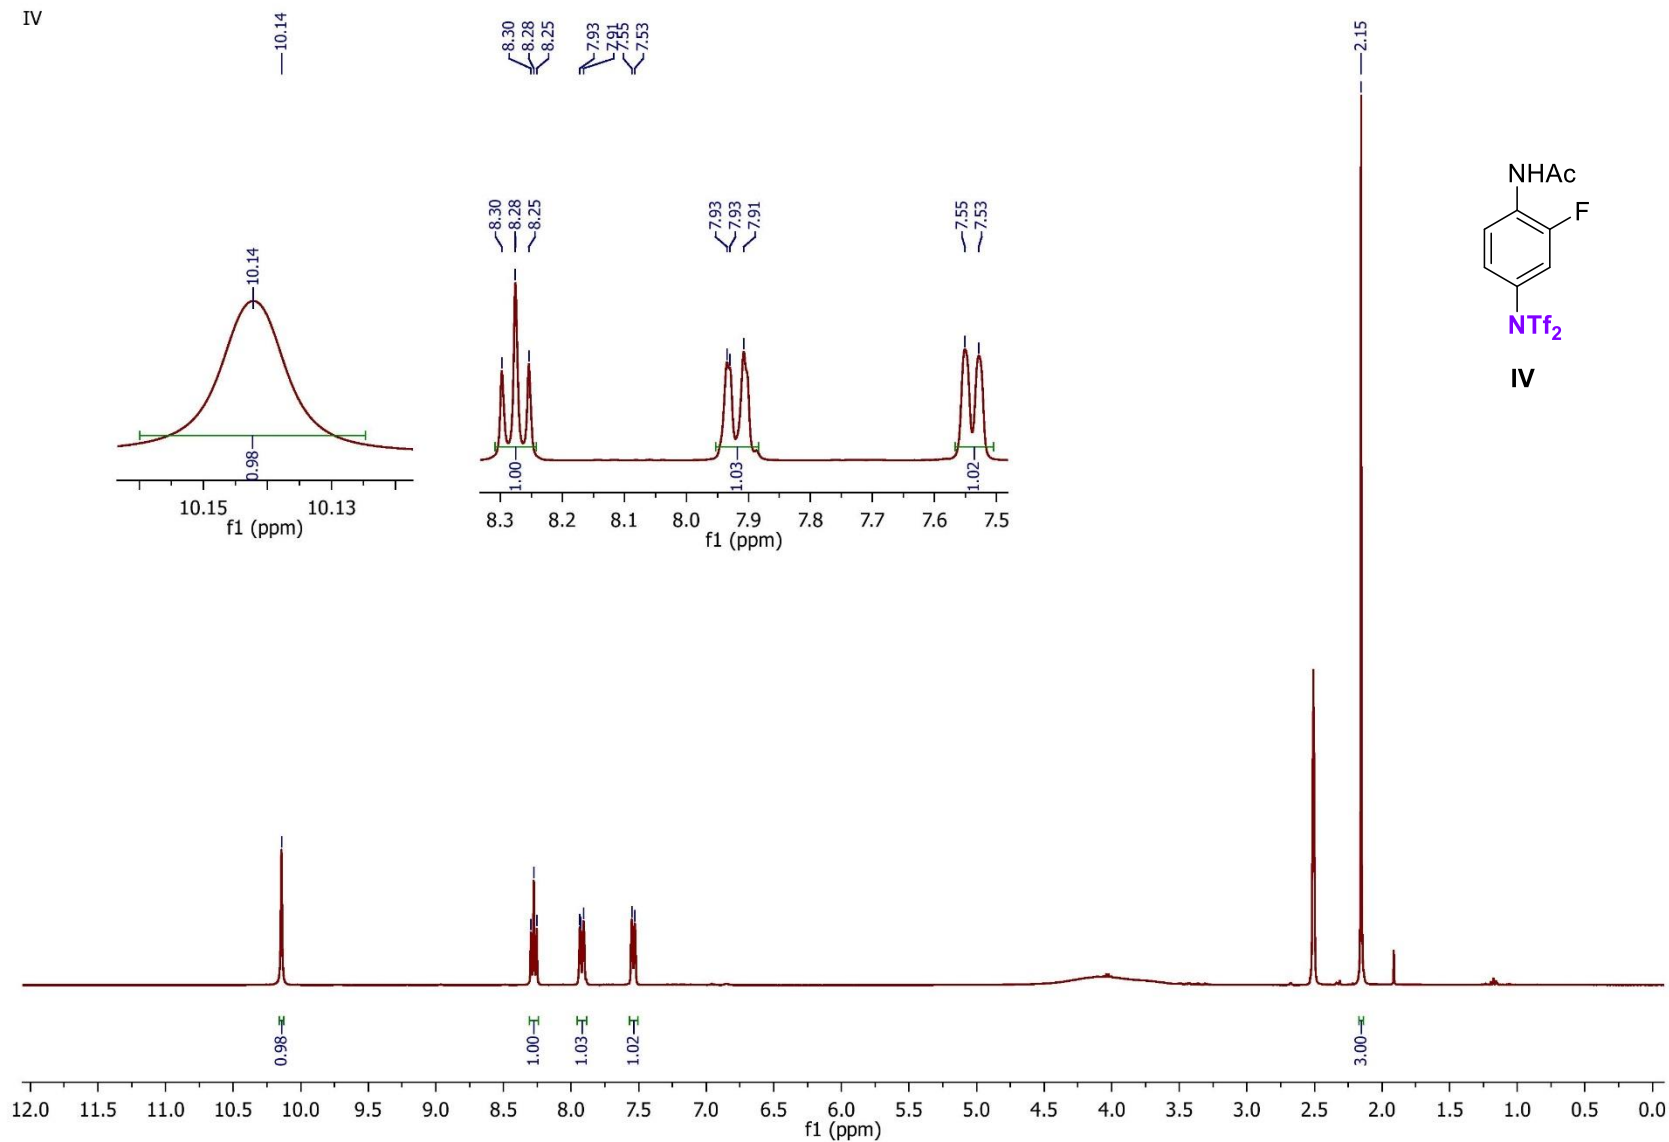

Figure S4.  $^1\text{H}$  NMR Spectrum of IV (400MHz,  $\text{DMSO-d}_6$ )

IV

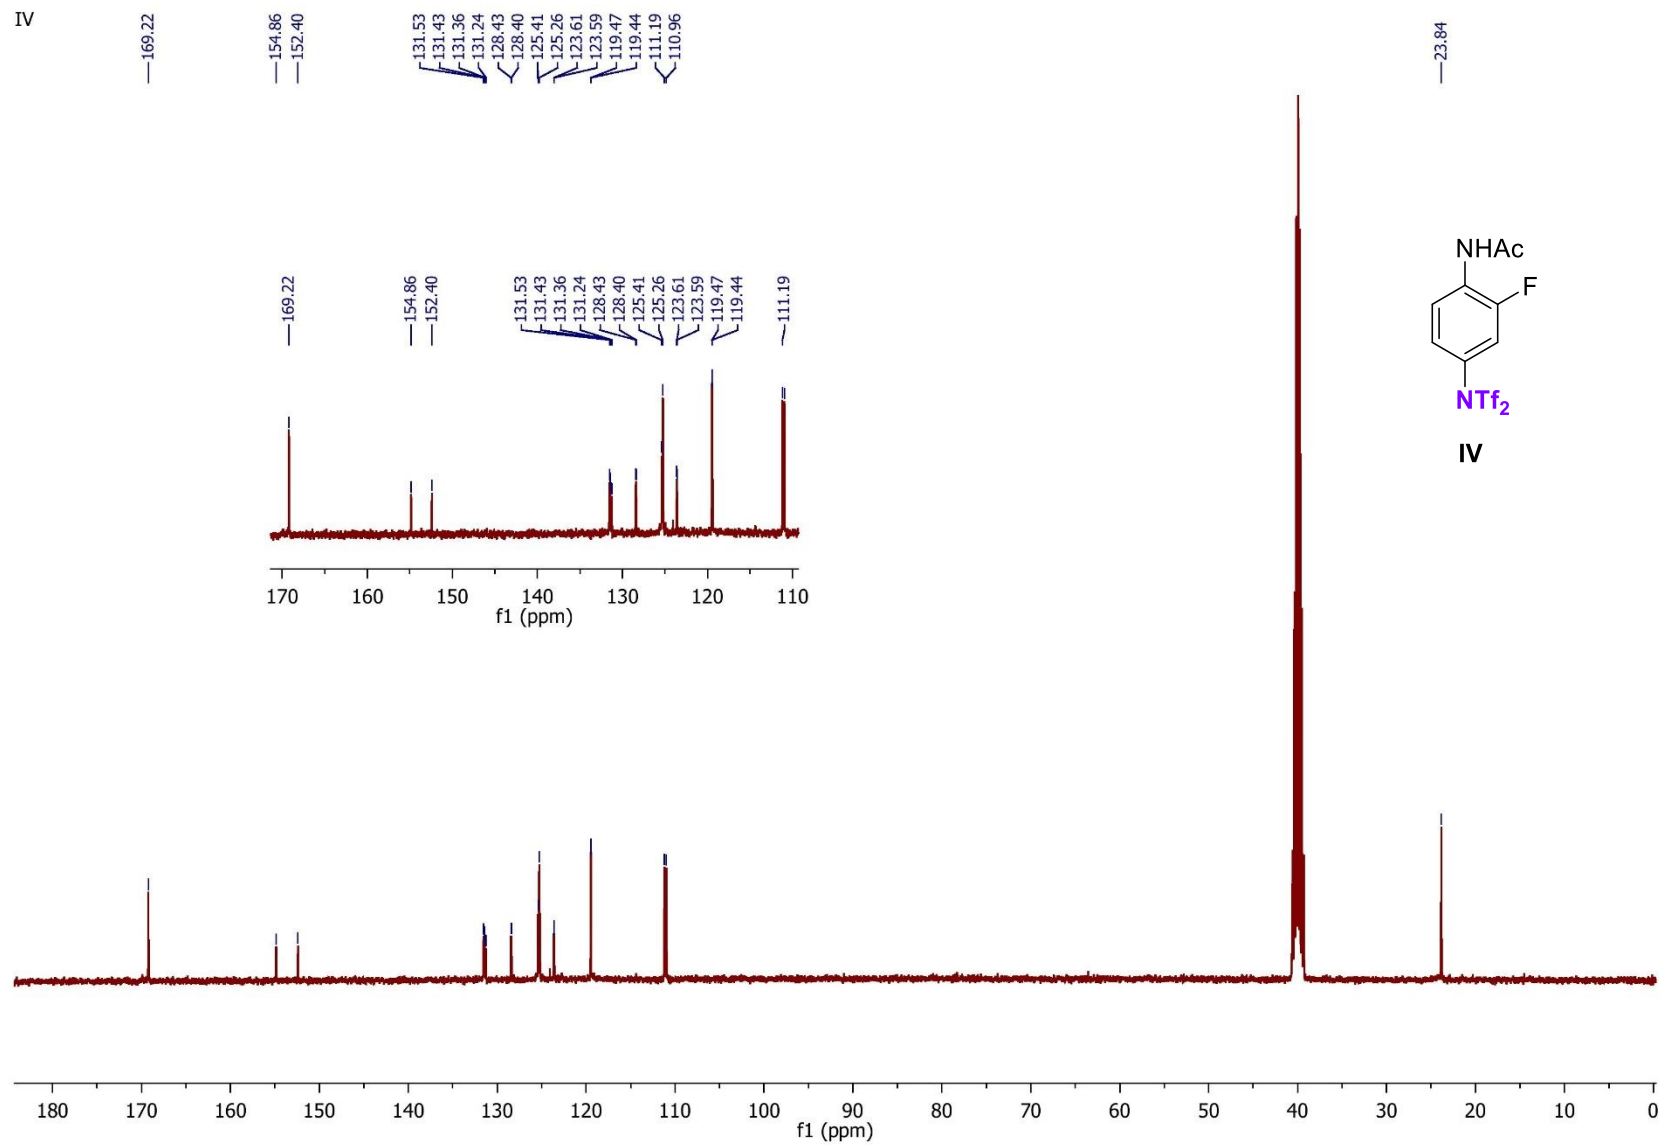

Figure S5.  $^{13}\text{C}$  NMR Spectrum of IV (400MHz, DMSO- $\text{d}_6$ )

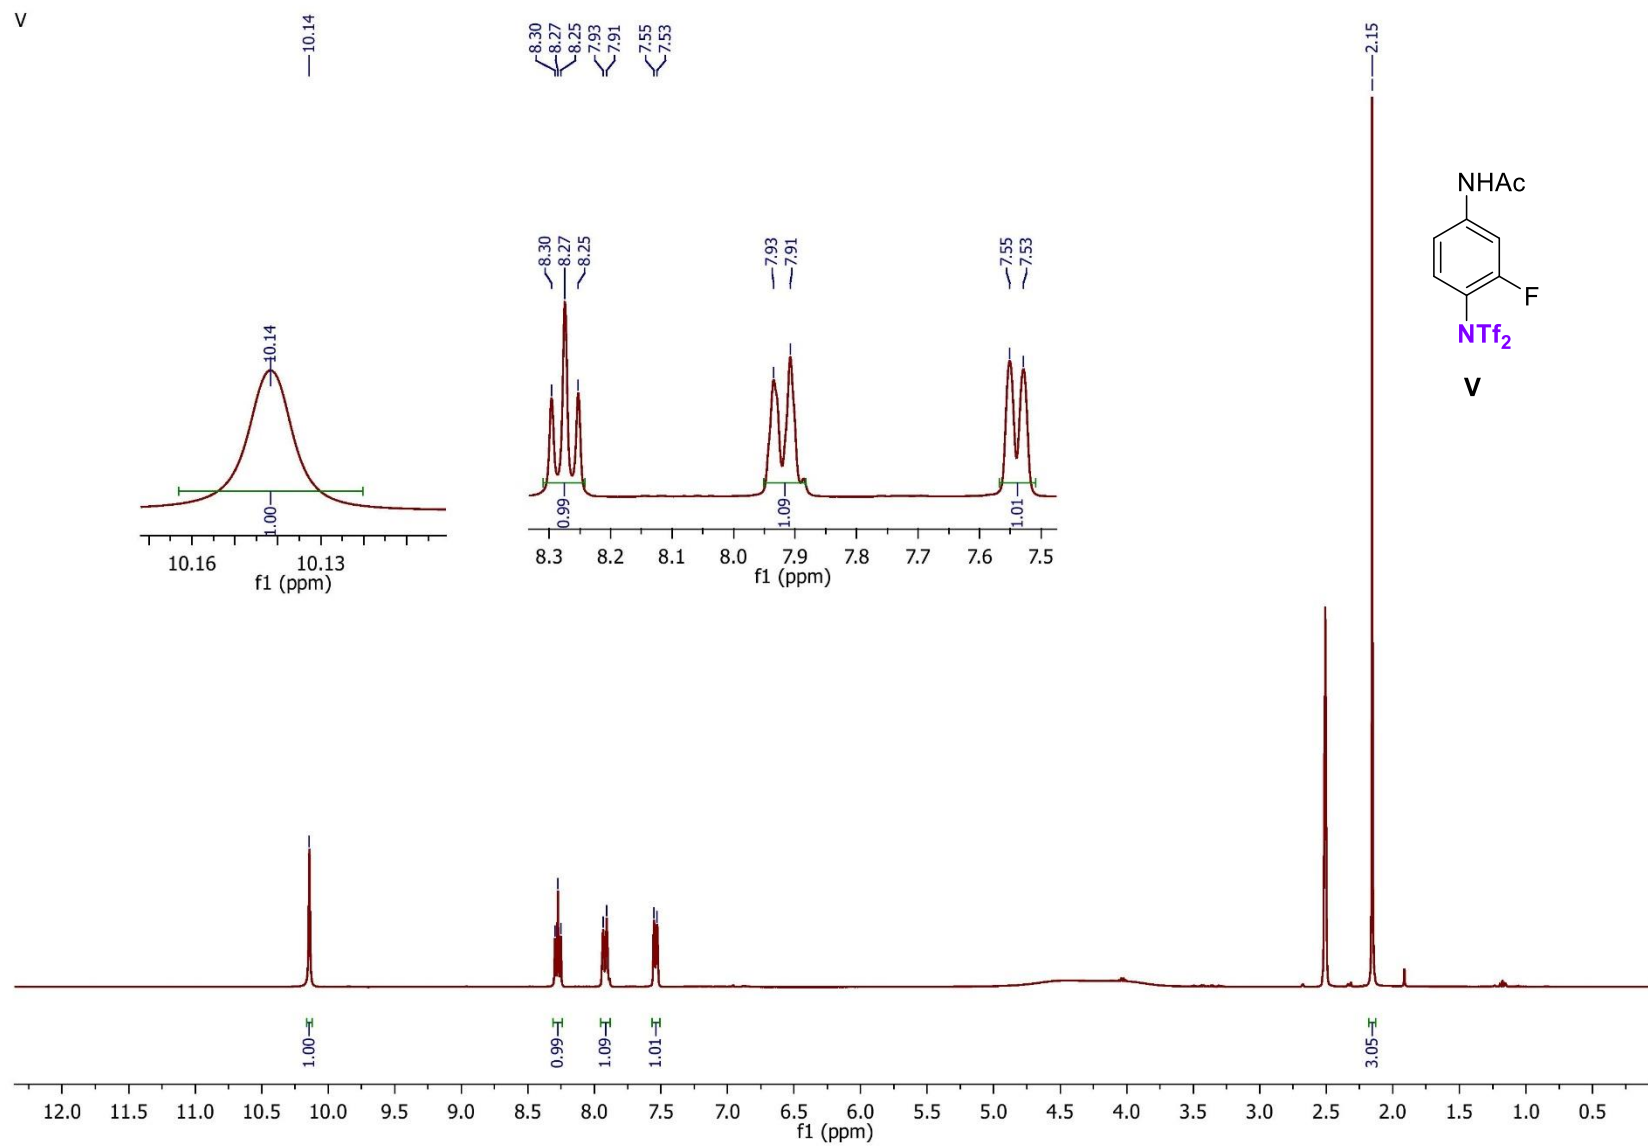

Figure S6.  $^1\text{H}$  NMR Spectrum of V (400MHz, DMSO- $\text{d}_6$ )

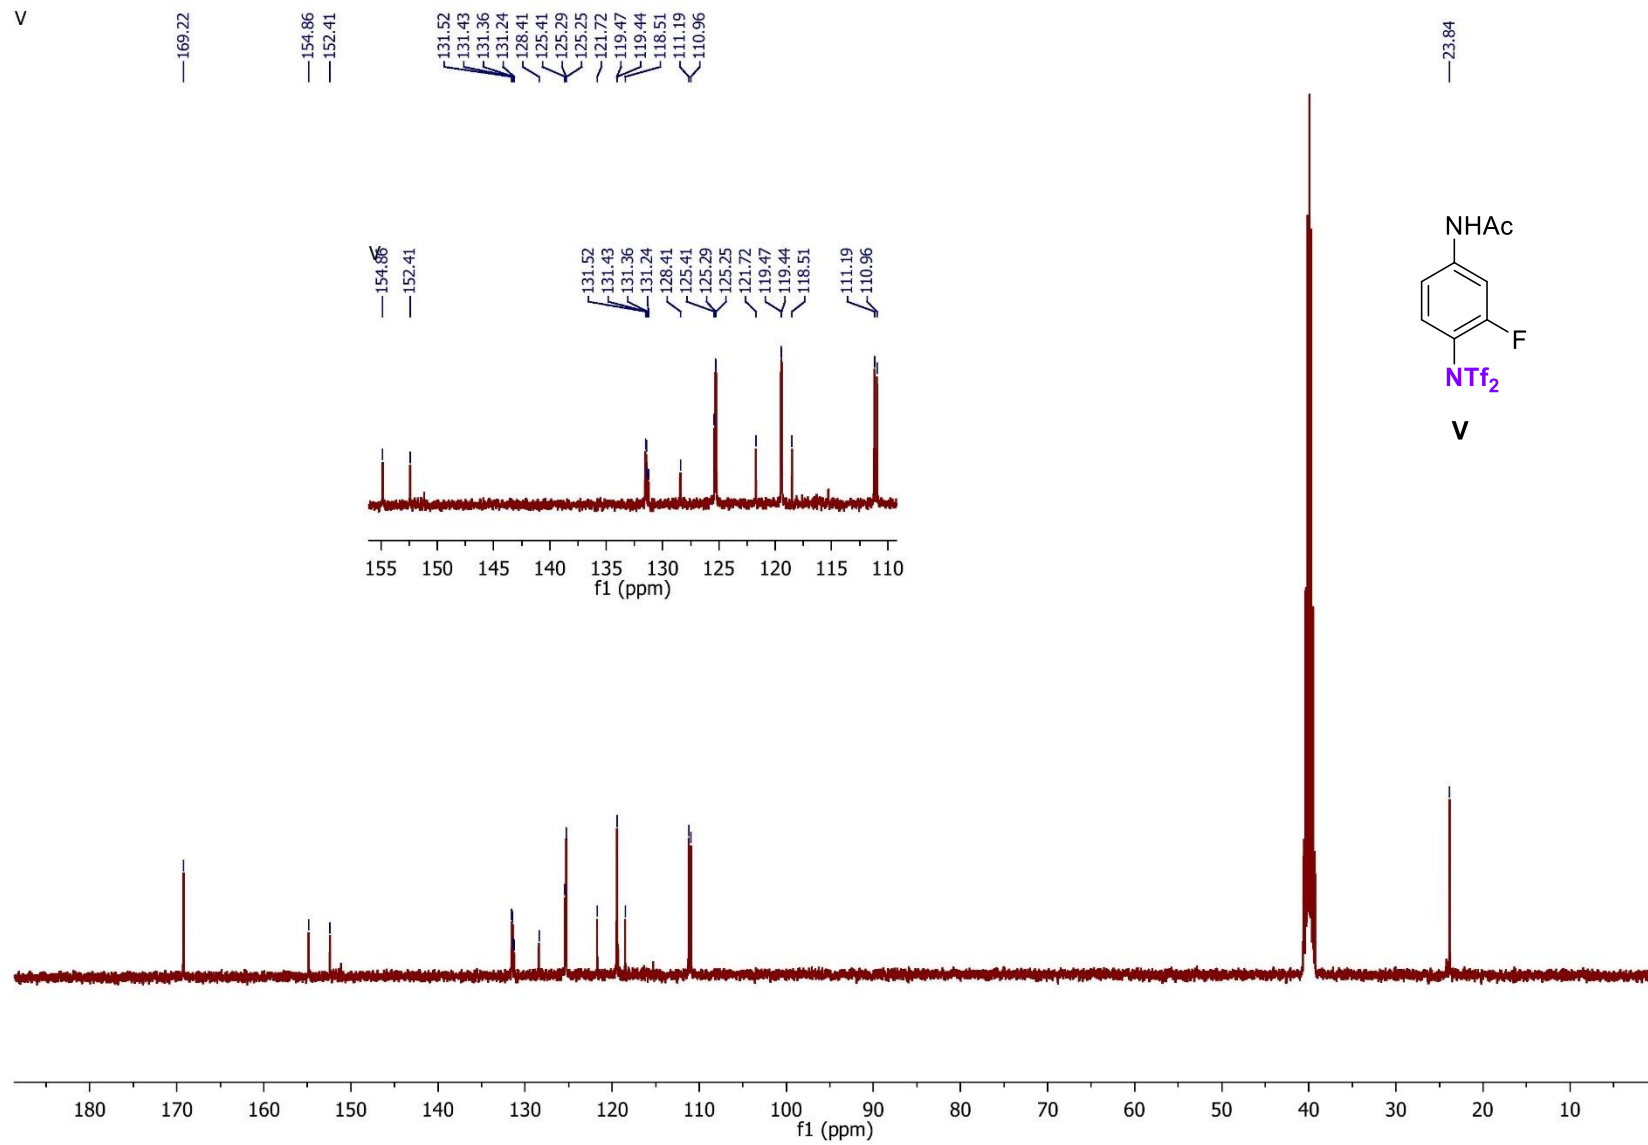

**Figure S7.** <sup>13</sup>C NMR Spectrum of V (400MHz, DMSO-d<sub>6</sub>)

CP-1 1H NMR

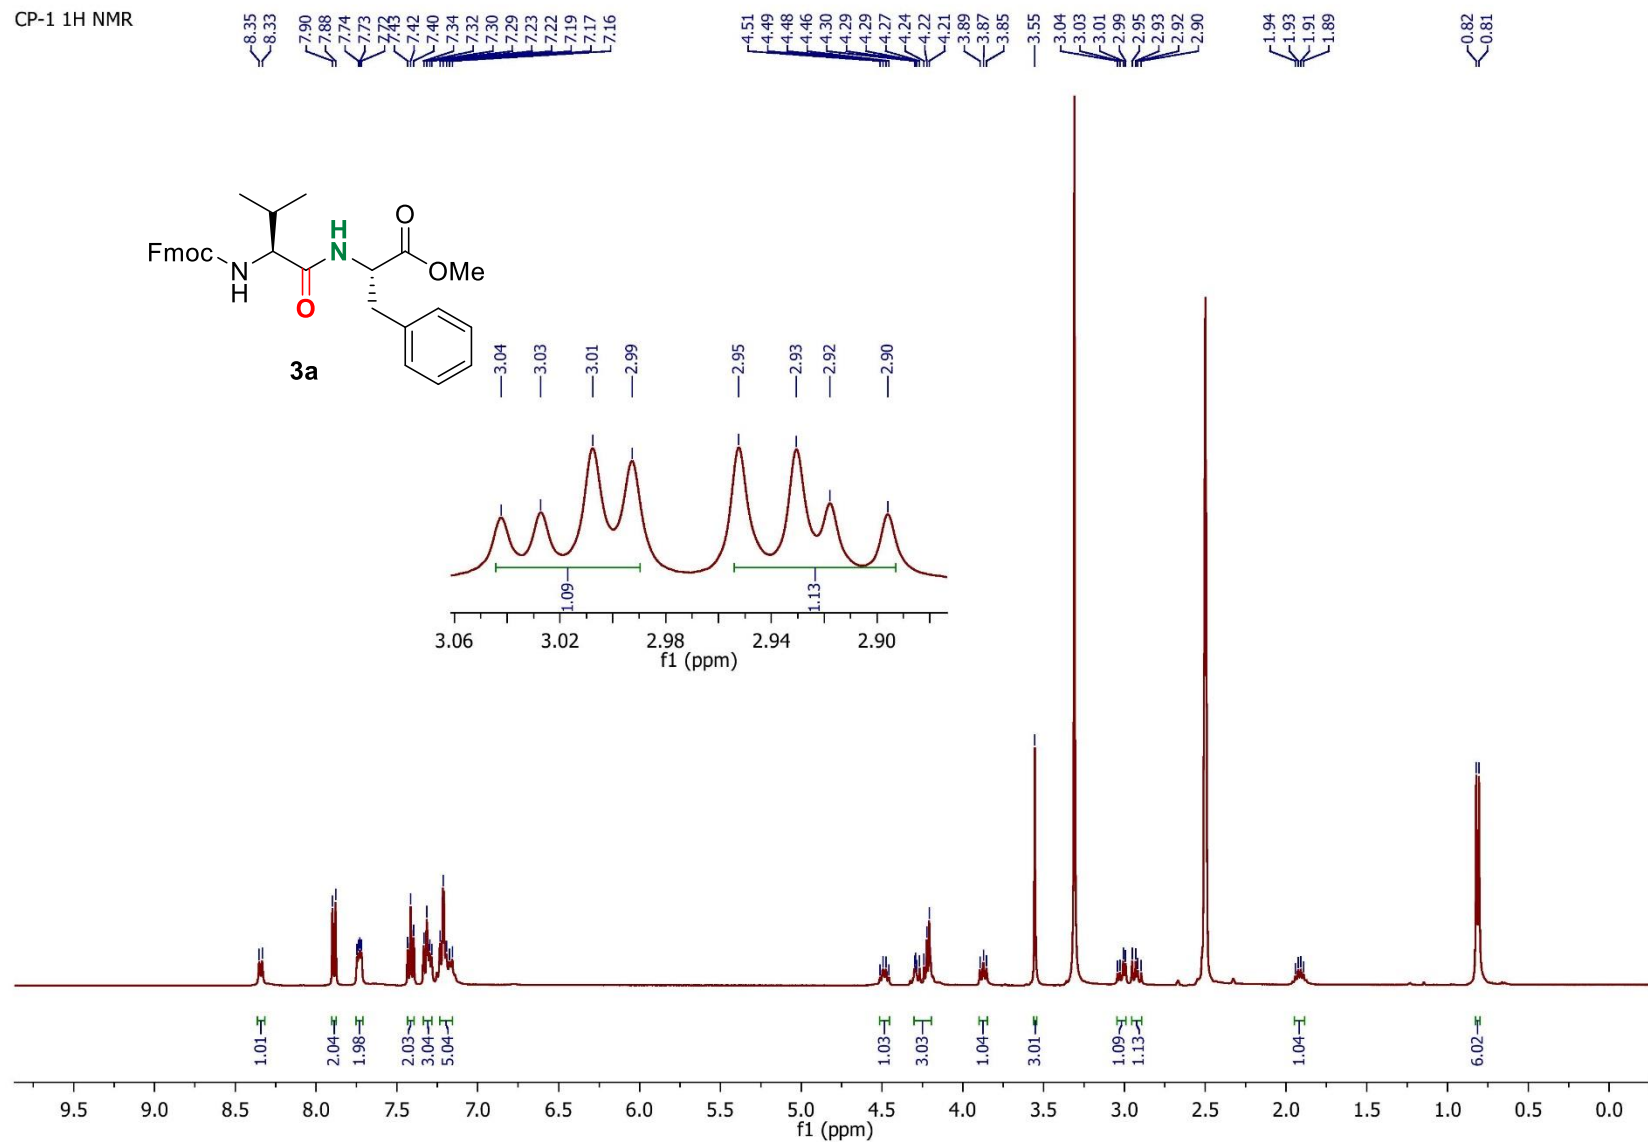

Figure S8. <sup>1</sup>H NMR Spectrum of **3a** (400MHz, DMSO-d<sub>6</sub>)

CP-1 <sup>13</sup>C NMR

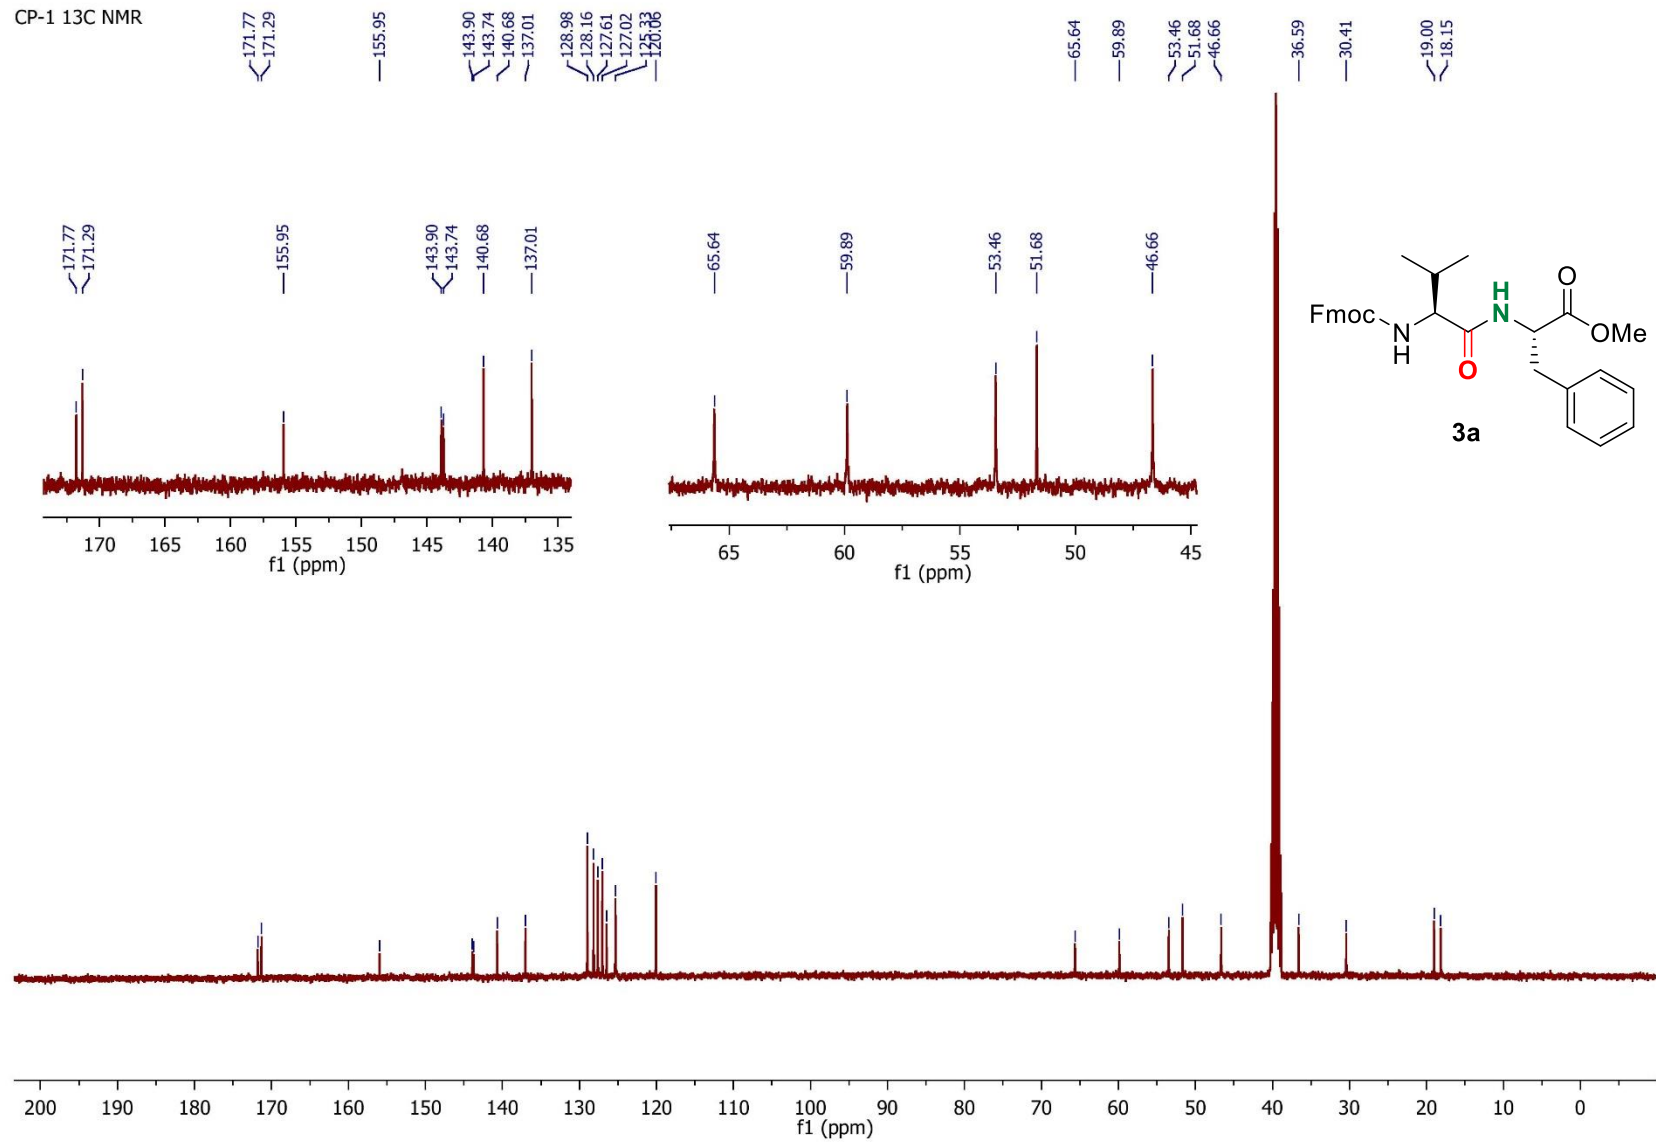

Figure S9. <sup>13</sup>C NMR Spectrum of 3a (101MHz, DMSO-d<sub>6</sub>)



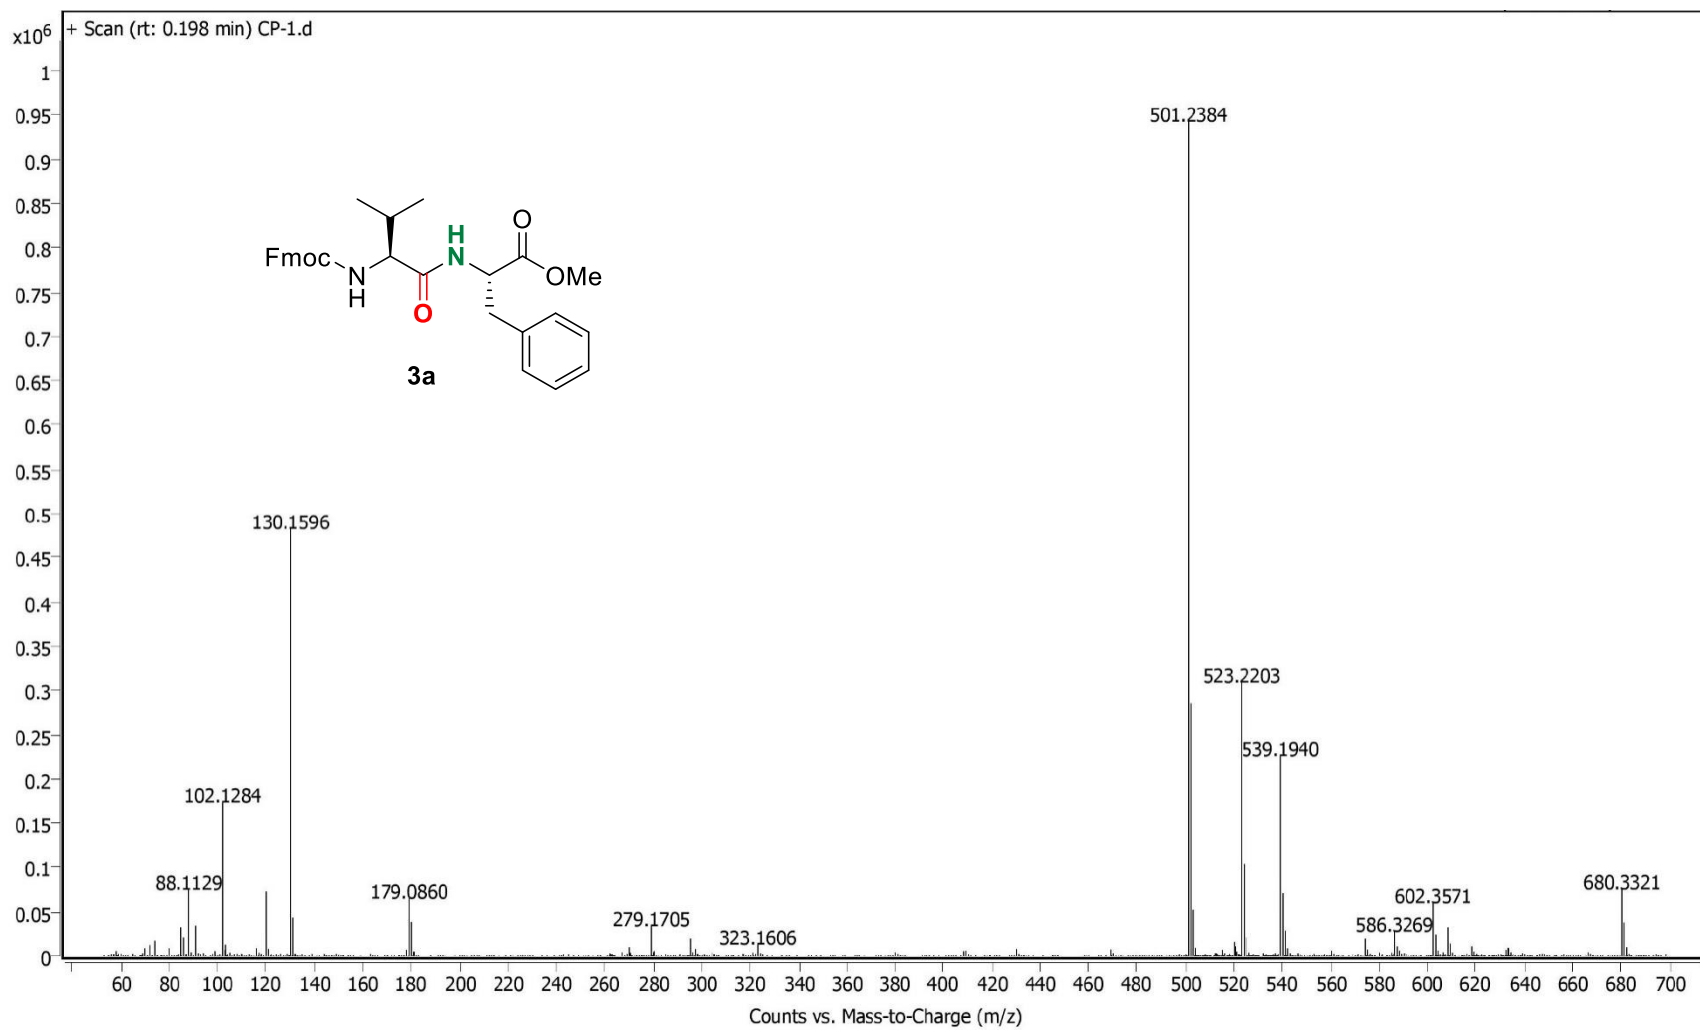

**Figure S10.** HRMS Spectrum of **3a**

CP-1 (D) 1H NMR

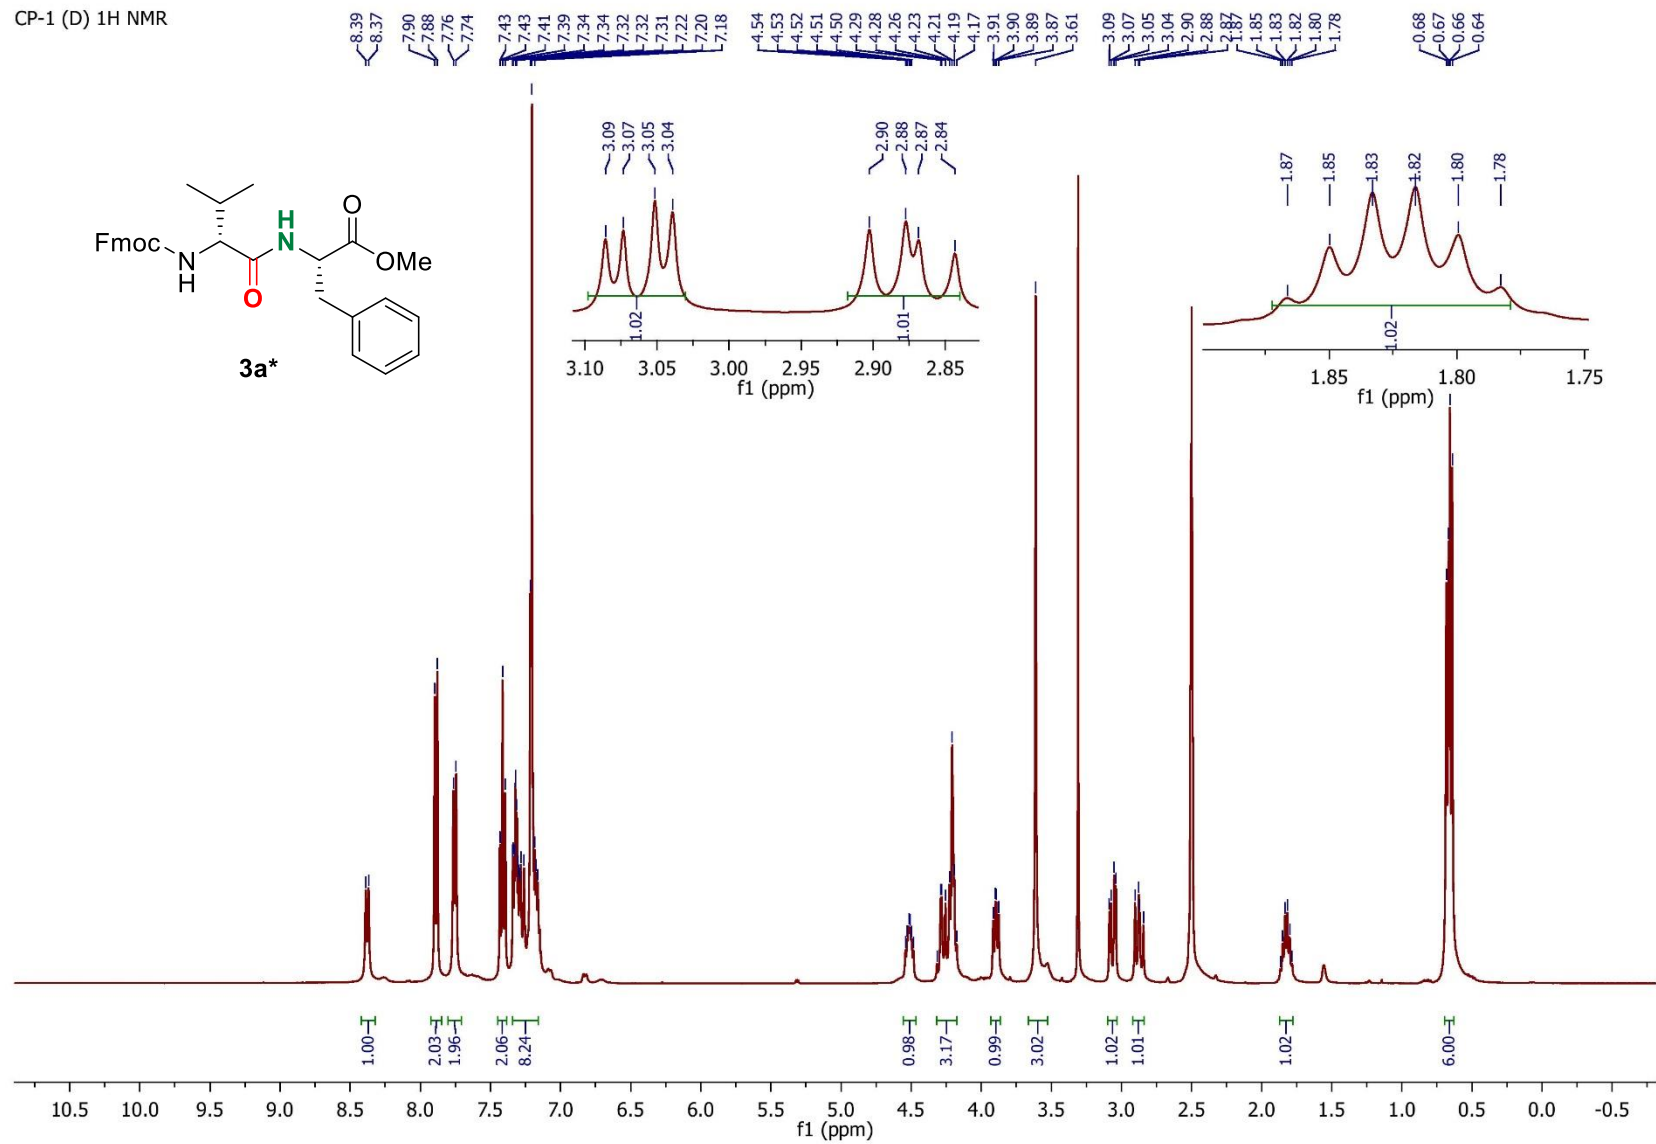

Figure S11. <sup>1</sup>H NMR Spectrum of **3a\*** (400MHz, DMSO-d<sub>6</sub>)

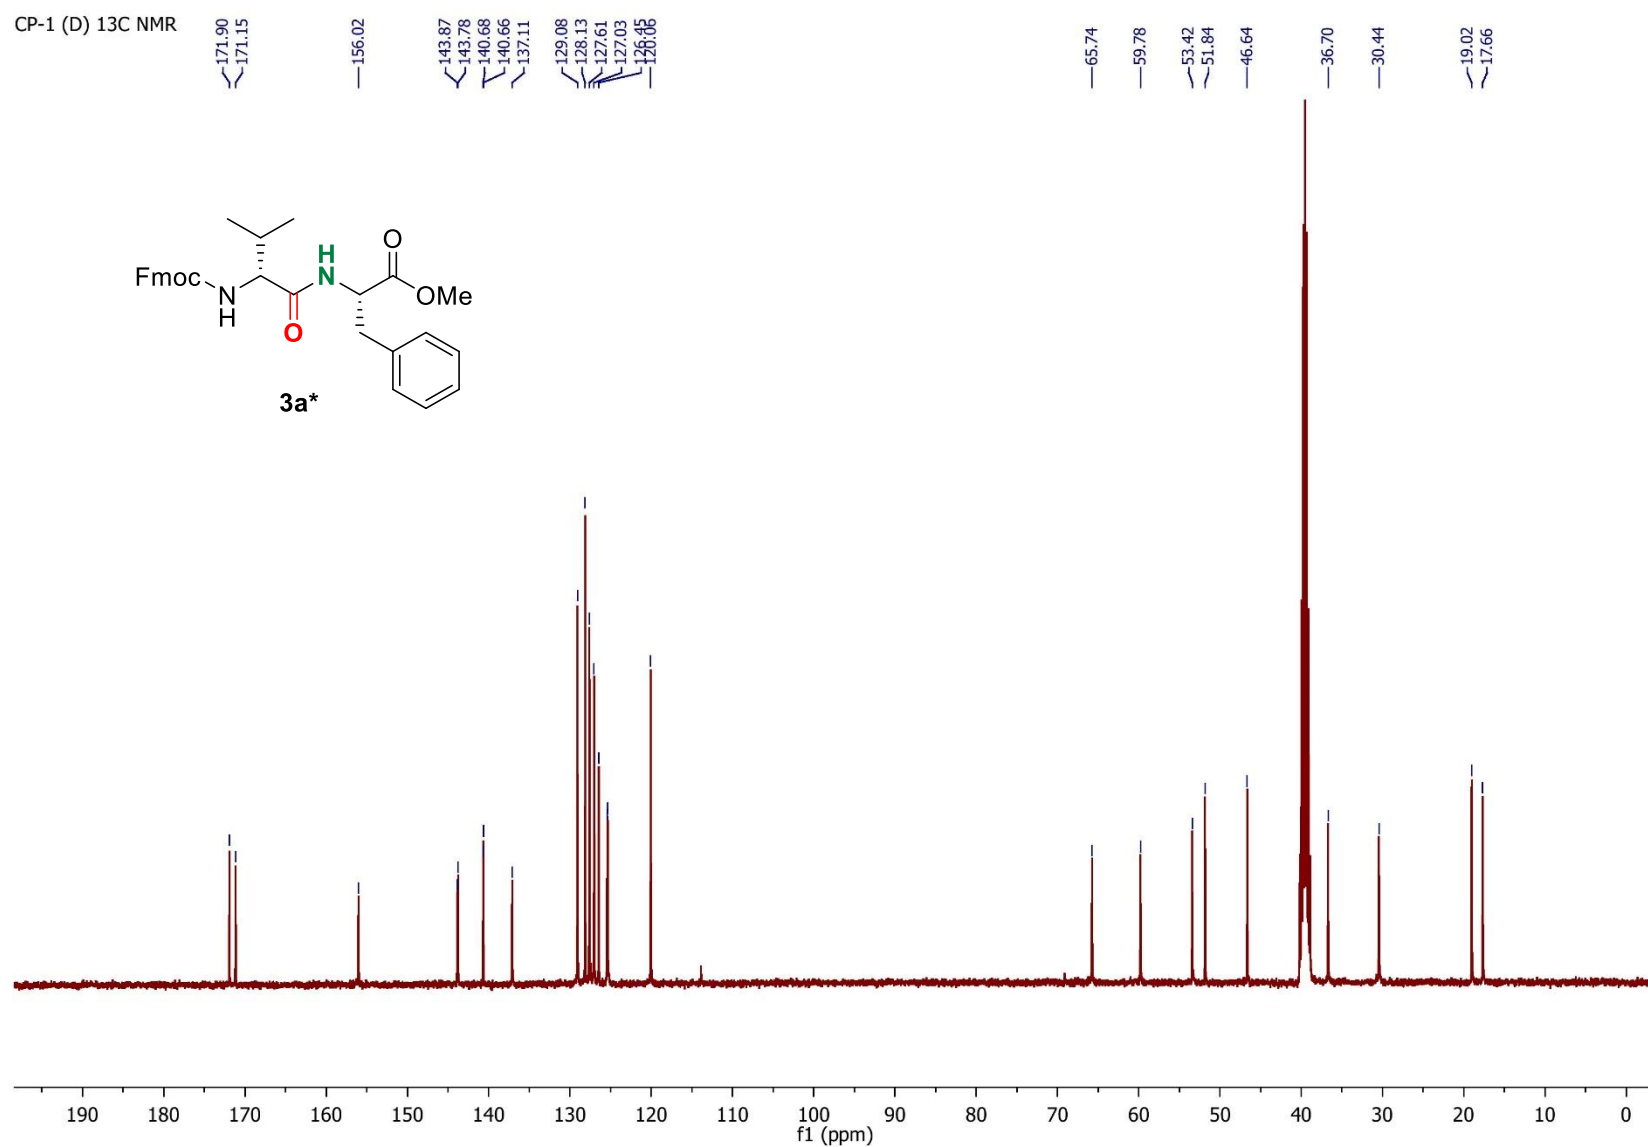

Figure S12.  $^{13}\text{C}$  NMR Spectrum of 3a\* (101MHz, DMSO- $\text{d}_6$ )

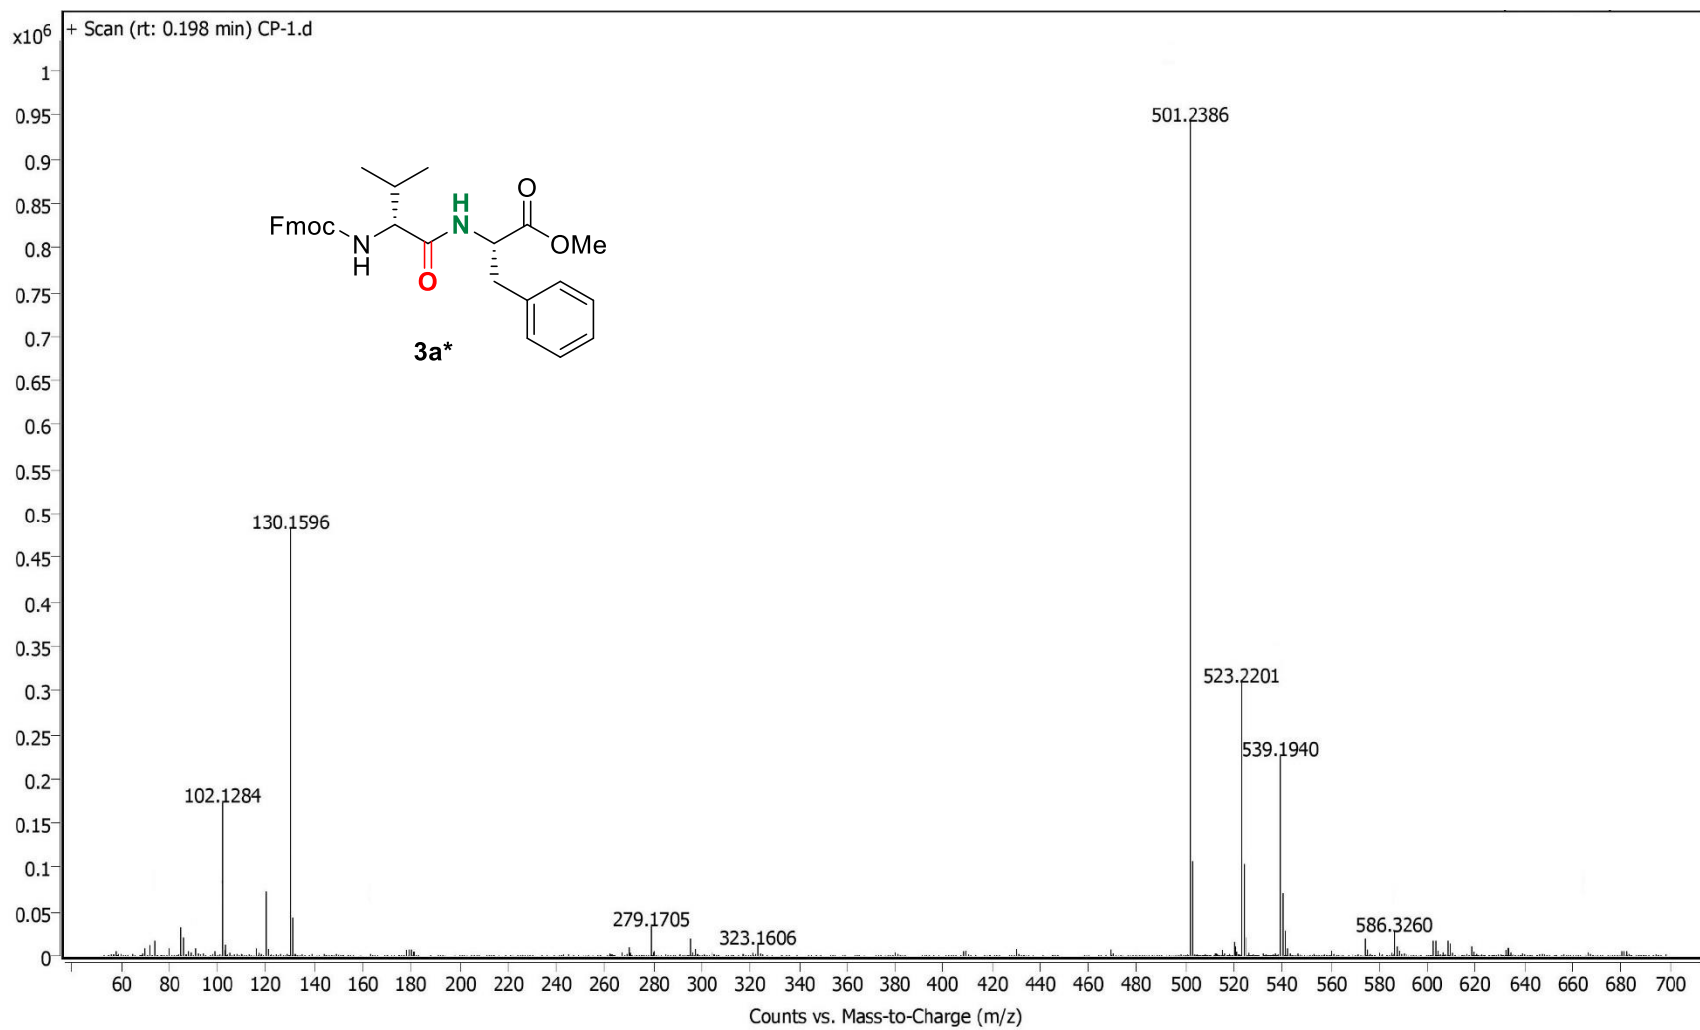

**Figure S13.** HRMS Spectrum of **3a\***

CP-2 1H NMR

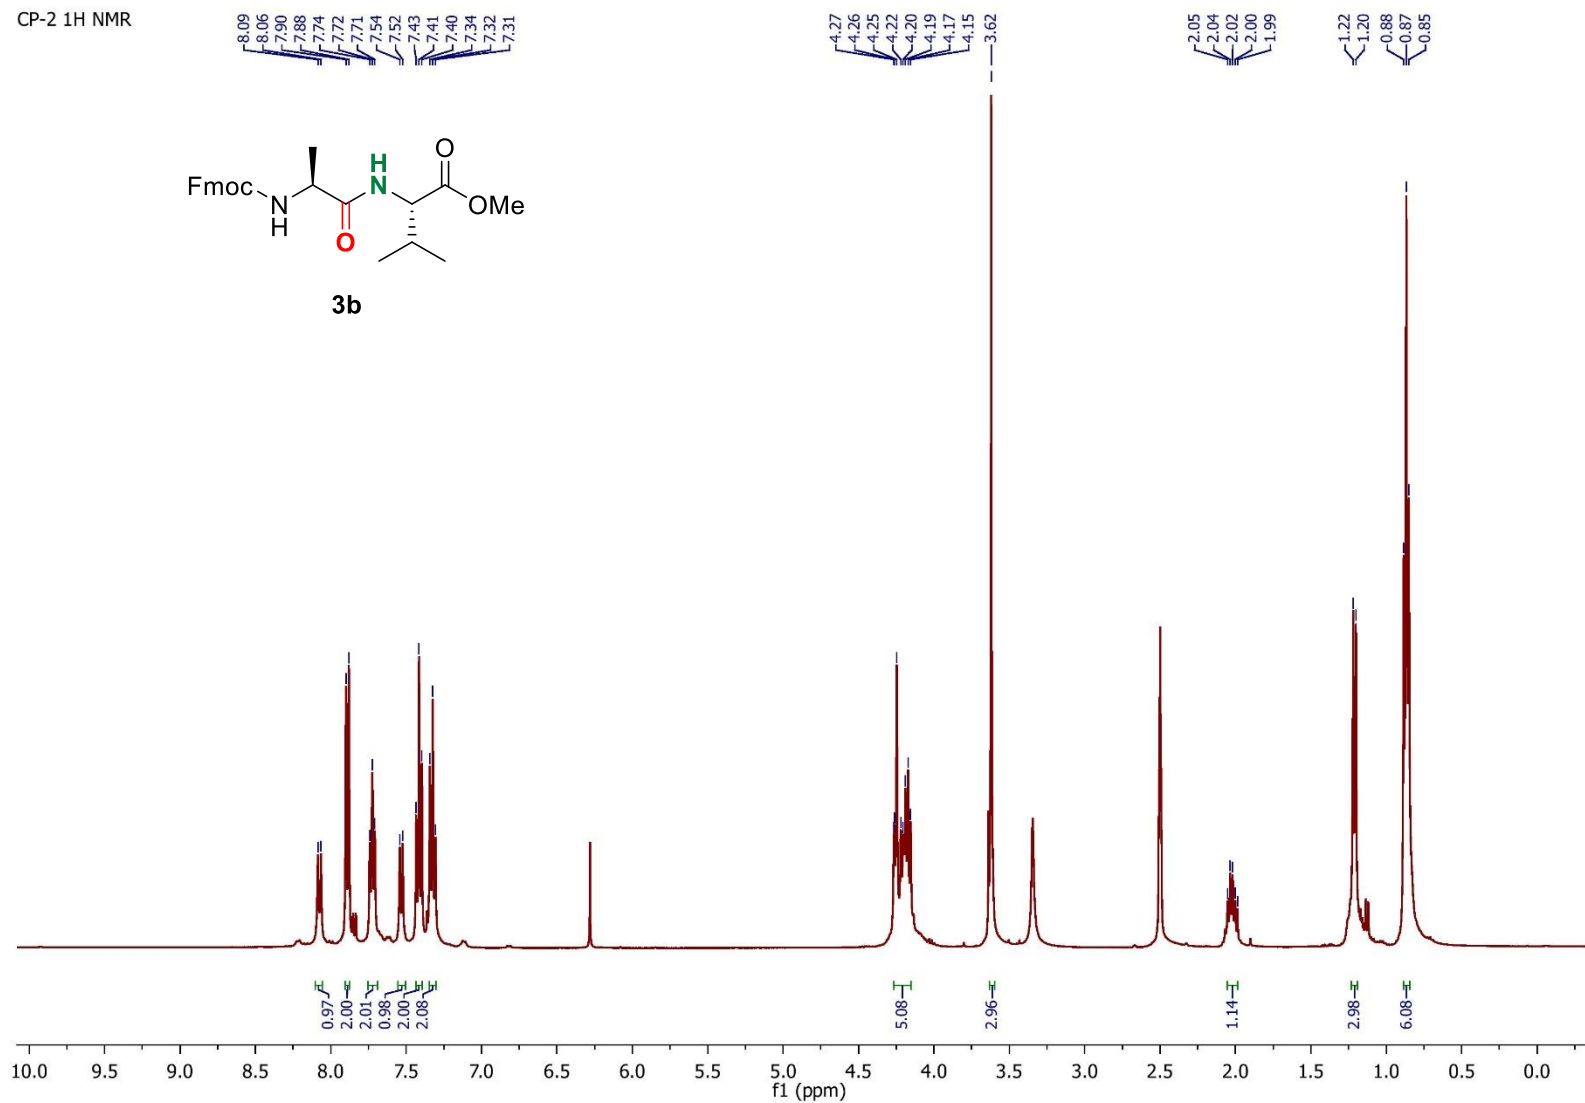

Figure S14.  $^1\text{H}$  NMR Spectrum of **3b** (400MHz,  $\text{DMSO-d}_6$ )

CP-2 13C NMR

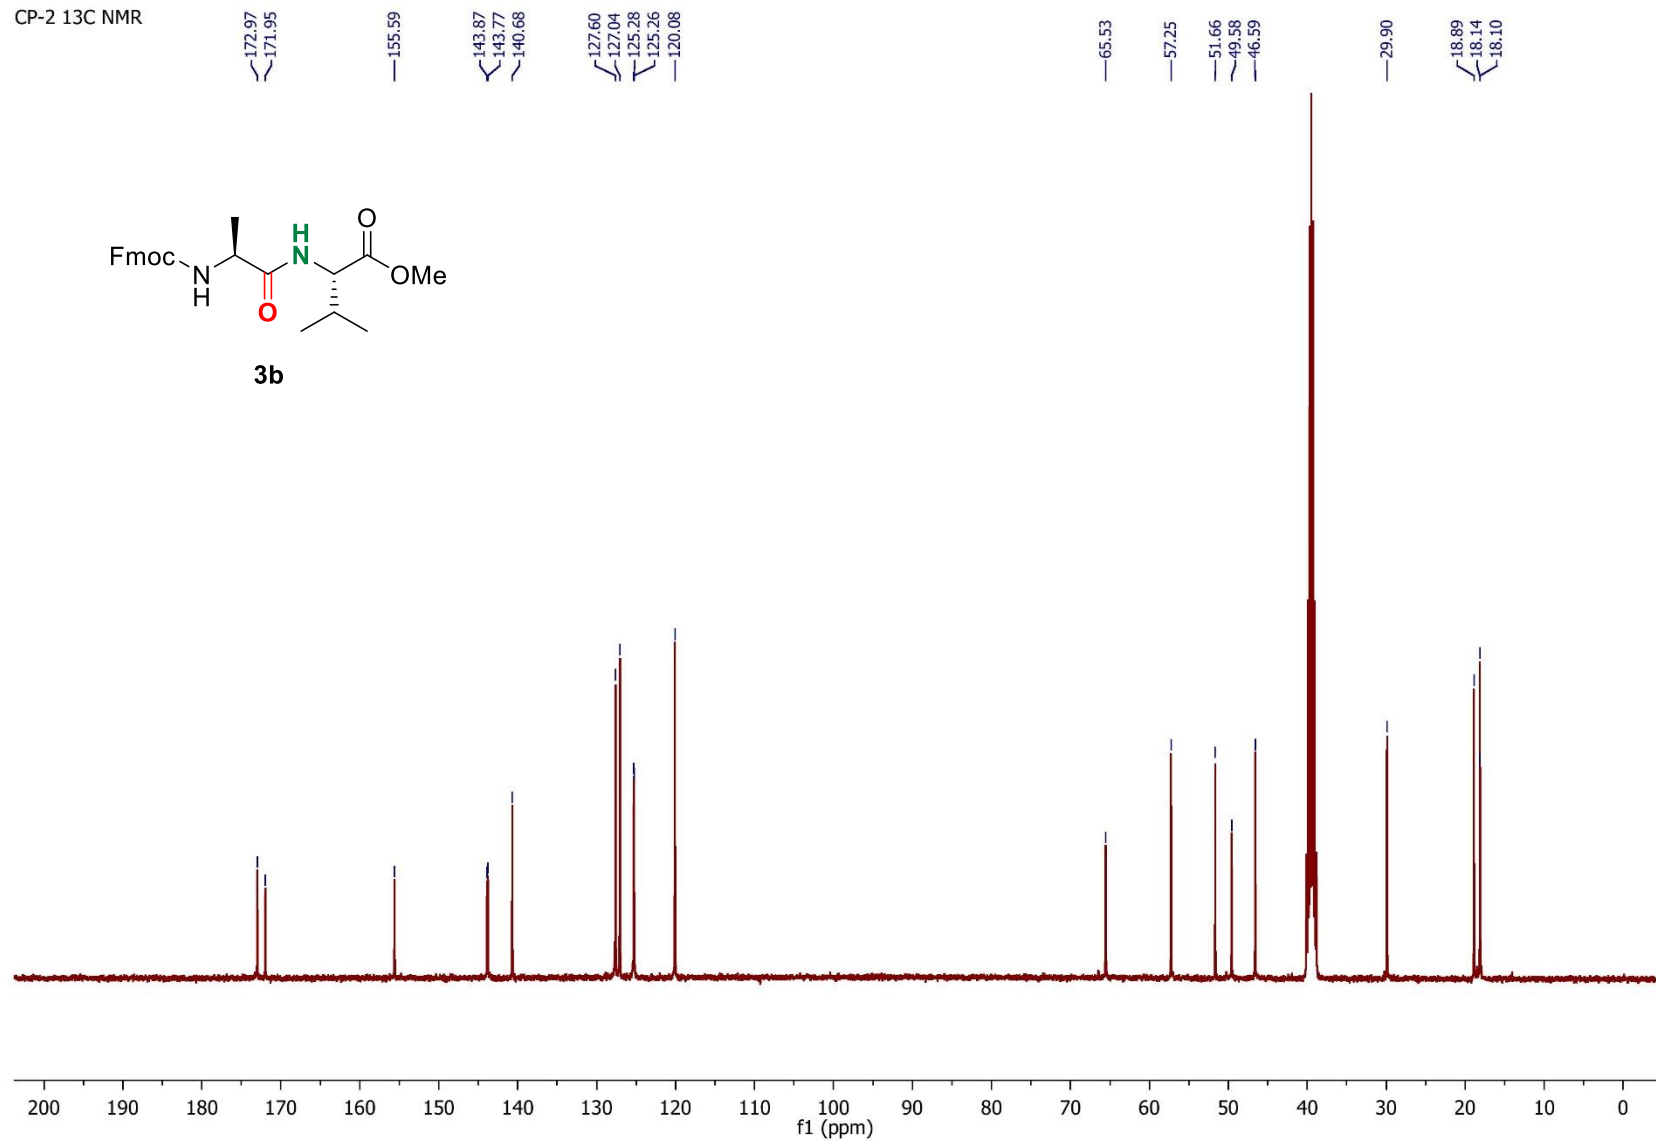

**Figure S15.** <sup>13</sup>C NMR Spectrum of **3b** (101MHz, DMSO-d<sub>6</sub>)

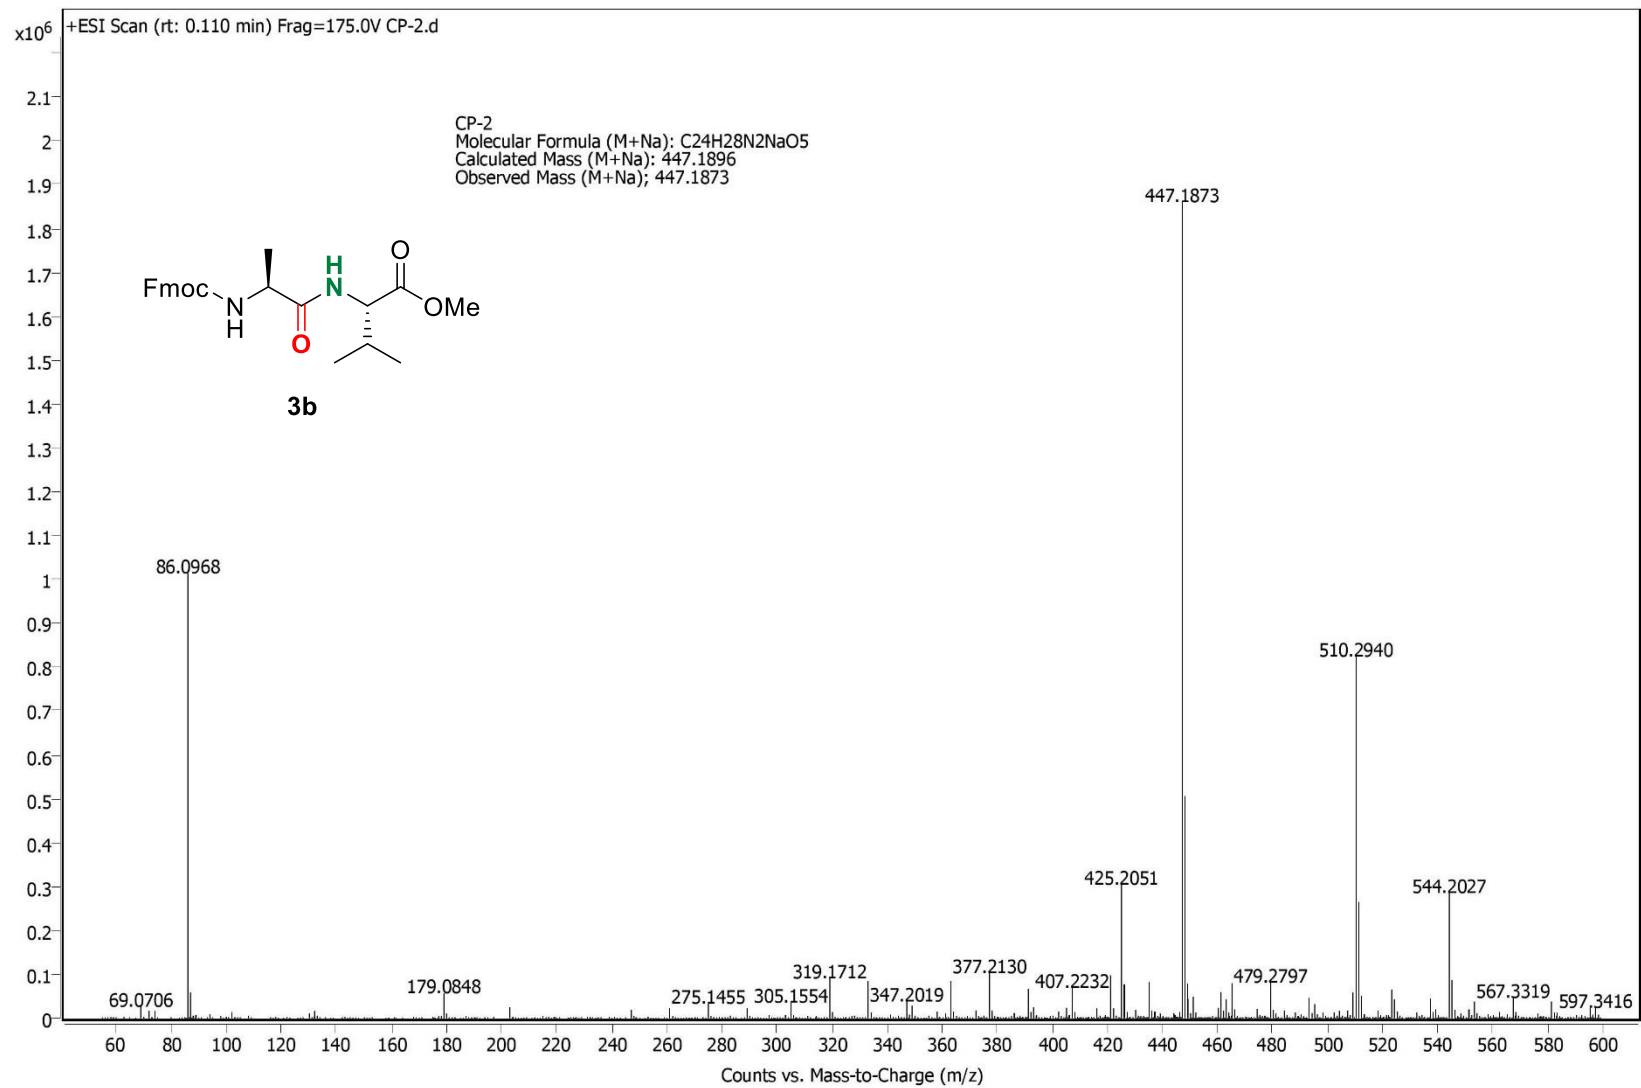

**Figure S16.** HRMS Spectrum of **3b**

CP-19 1H NMR

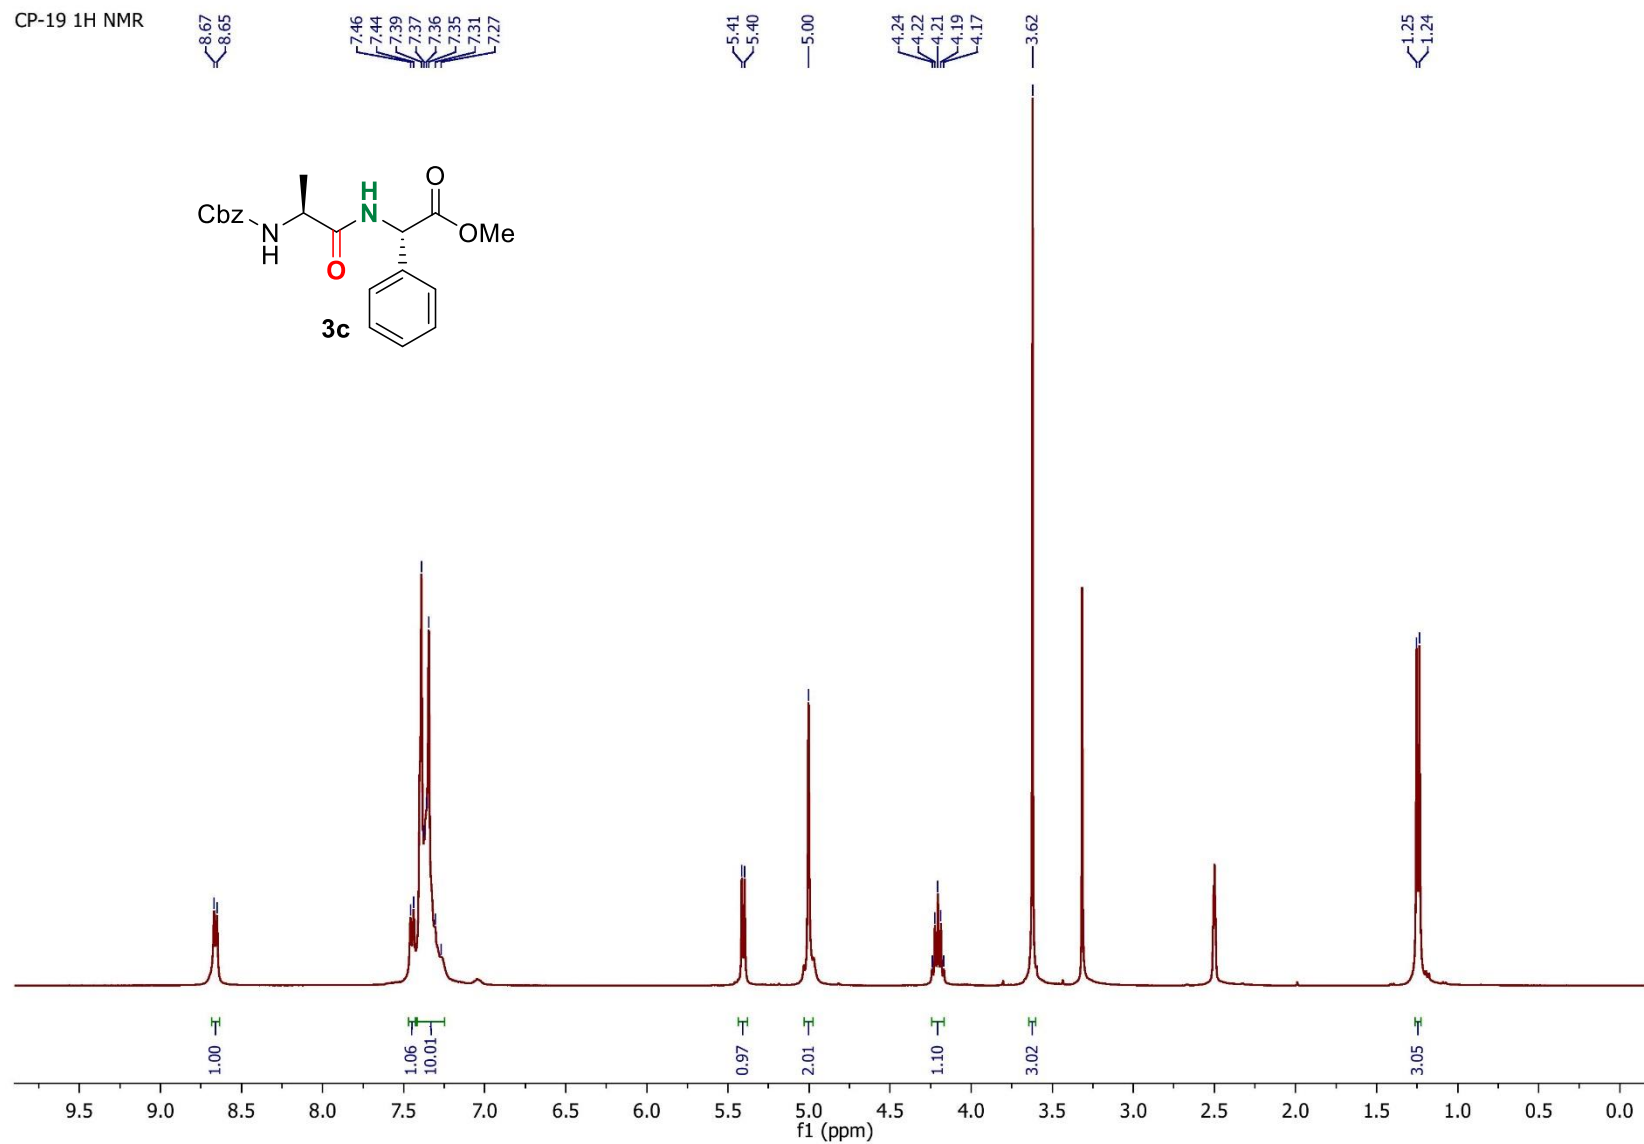

Figure S17. <sup>1</sup>H NMR Spectrum of 3c (400MHz, DMSO-d<sub>6</sub>)



CP-19 <sup>13</sup>C NMR

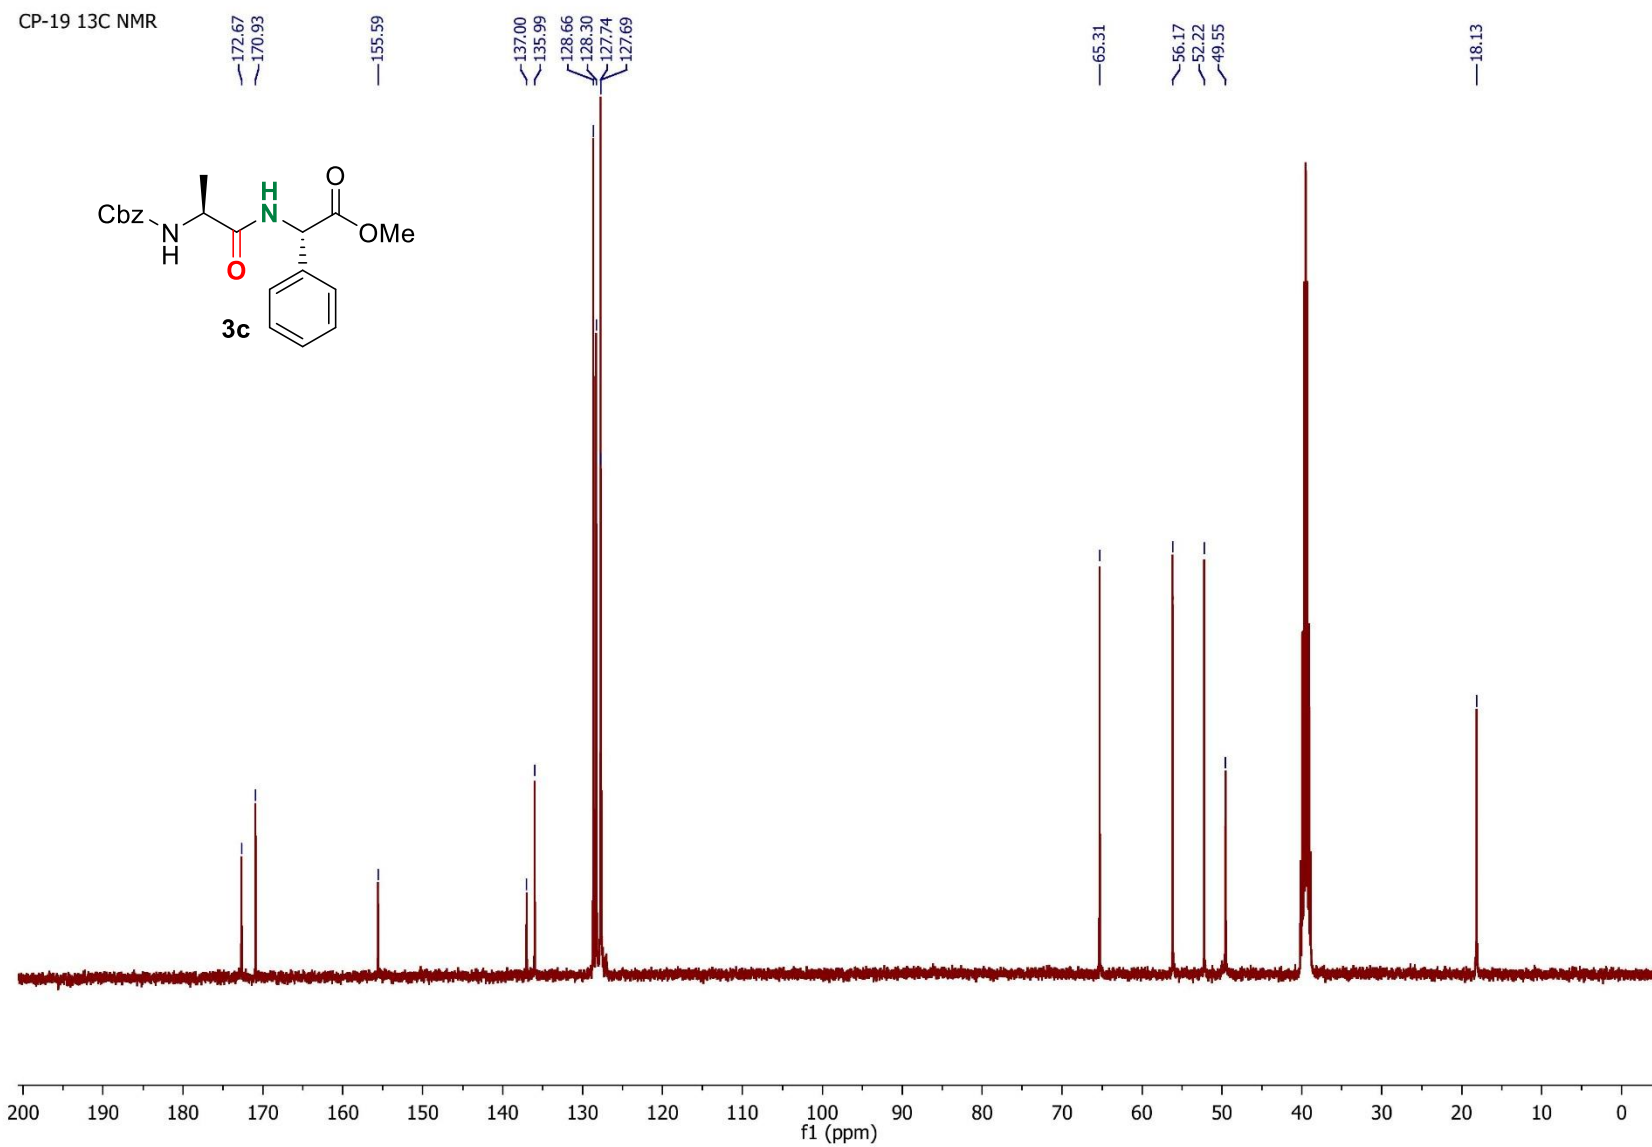

**Figure S18.** <sup>13</sup>C NMR Spectrum of **3c** (101MHz, DMSO-d<sub>6</sub>)

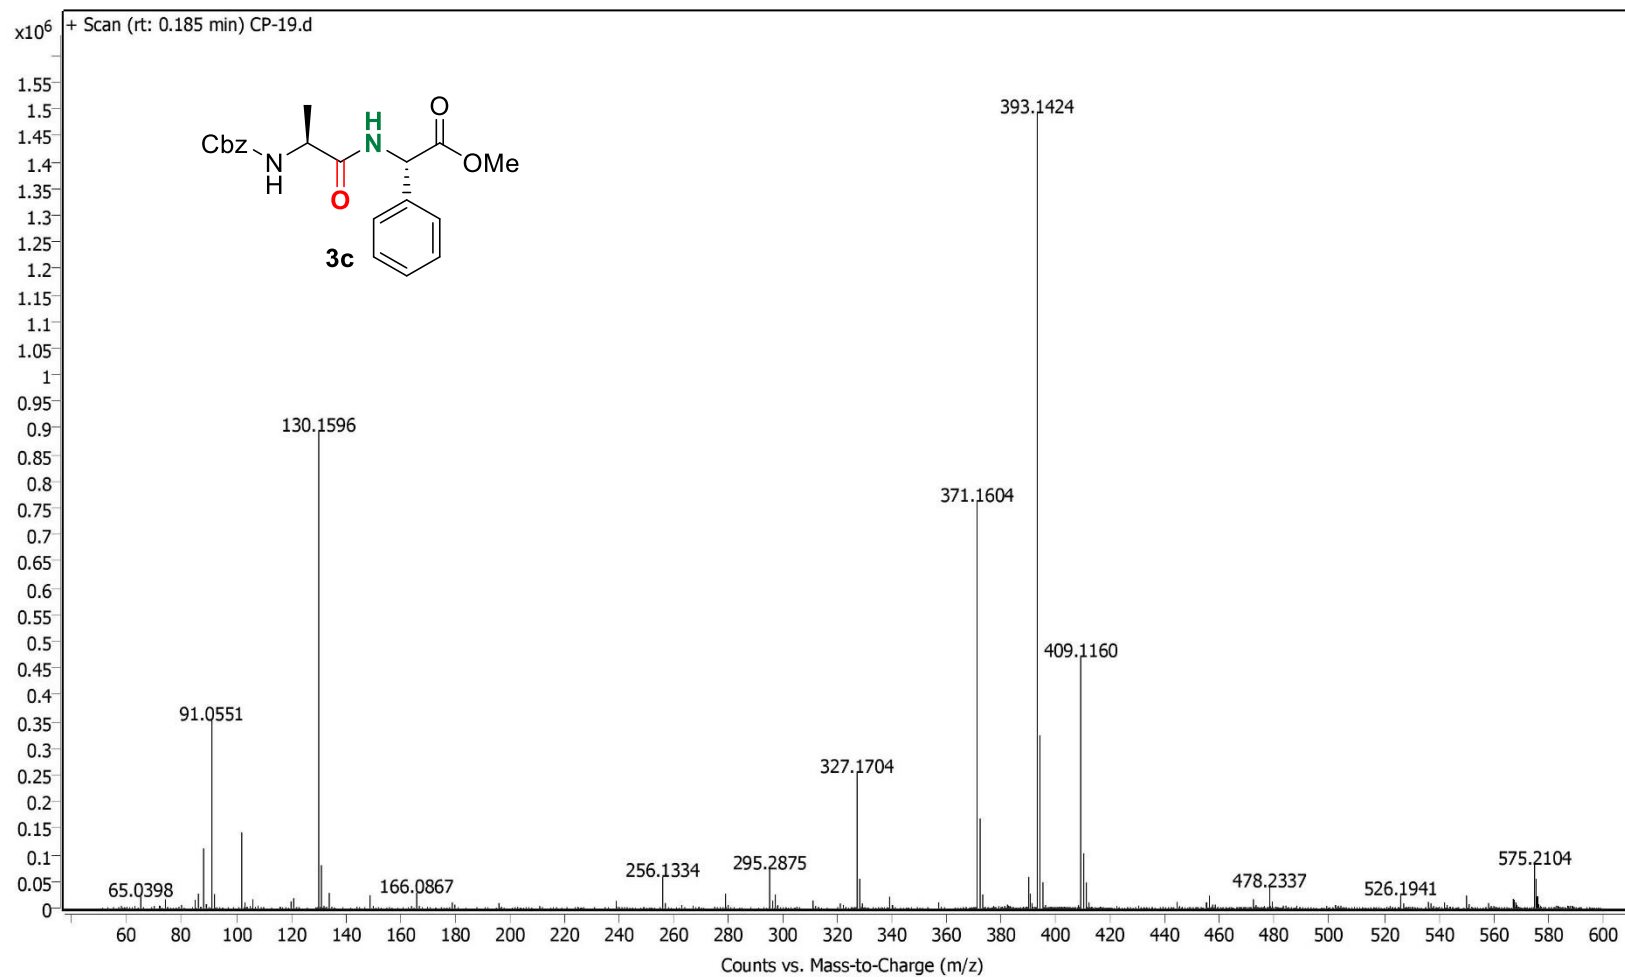

**Figure S19.** HRMS Spectrum of **3c**

CP-9 1H NMR

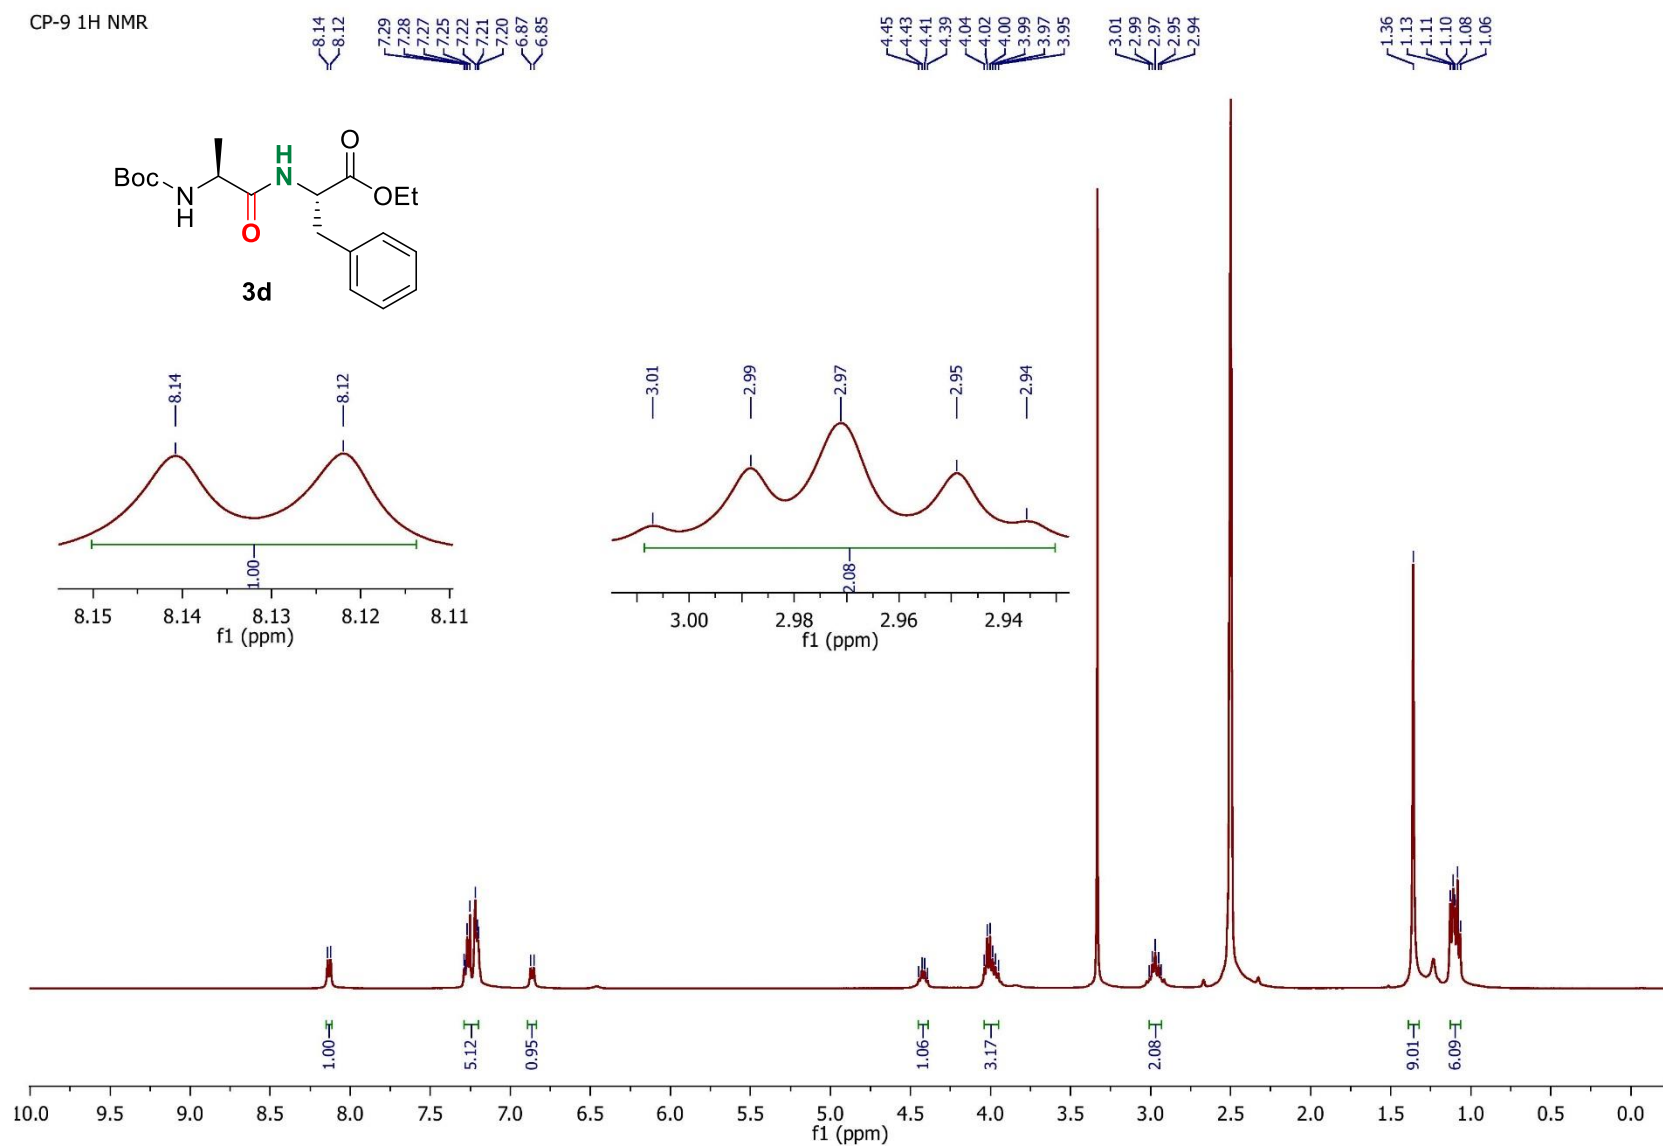

Figure S20. <sup>1</sup>H NMR Spectrum of **3d** (400MHz, DMSO-d<sub>6</sub>)

CP-9 13C NMR

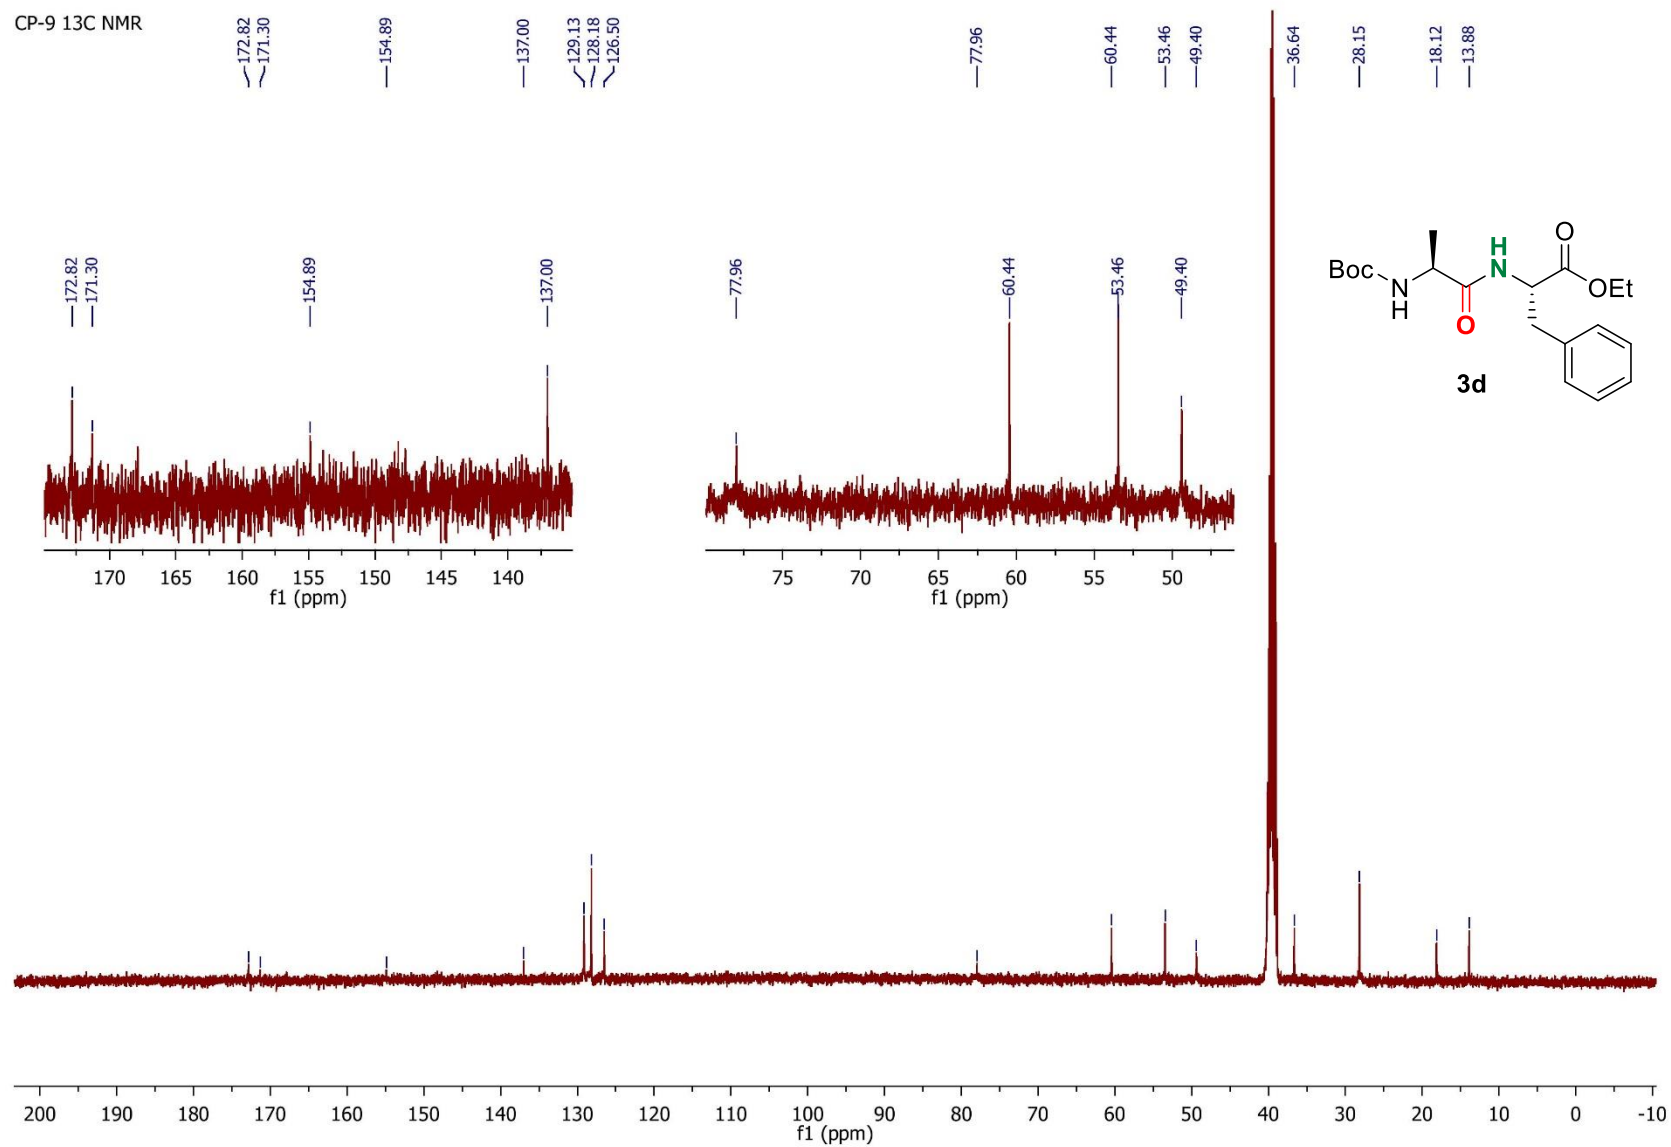

**Figure S21.** <sup>13</sup>C NMR Spectrum of 3d (101MHz, DMSO-d<sub>6</sub>)

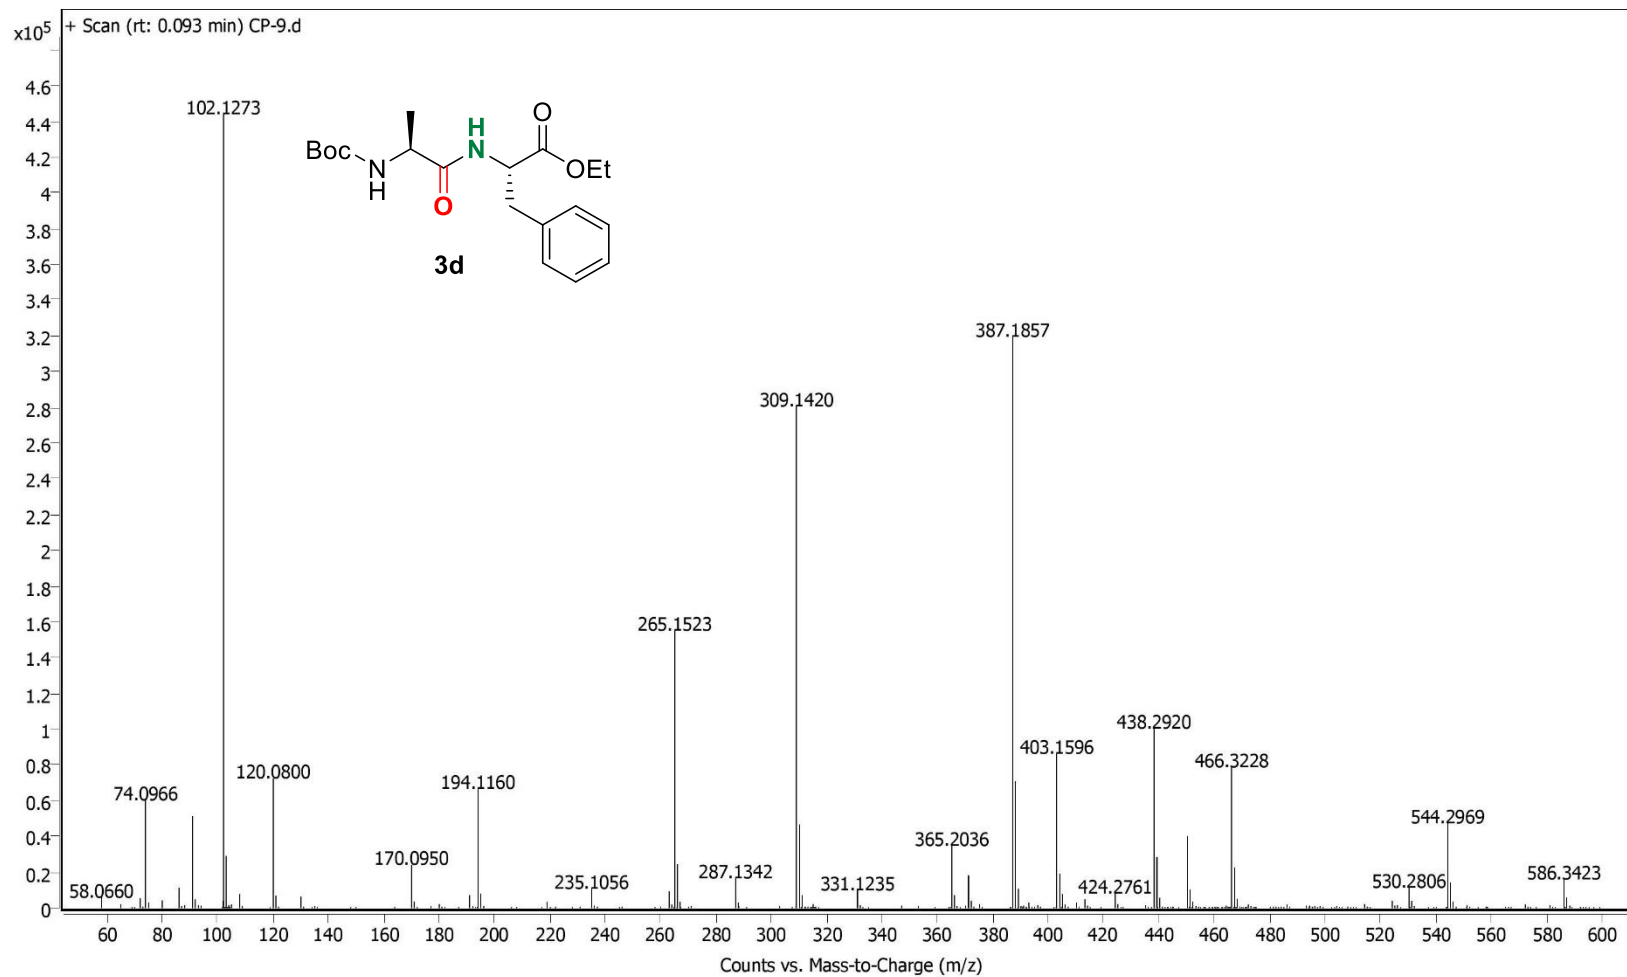

**Figure S22.** HRMS Spectrum of **3d**

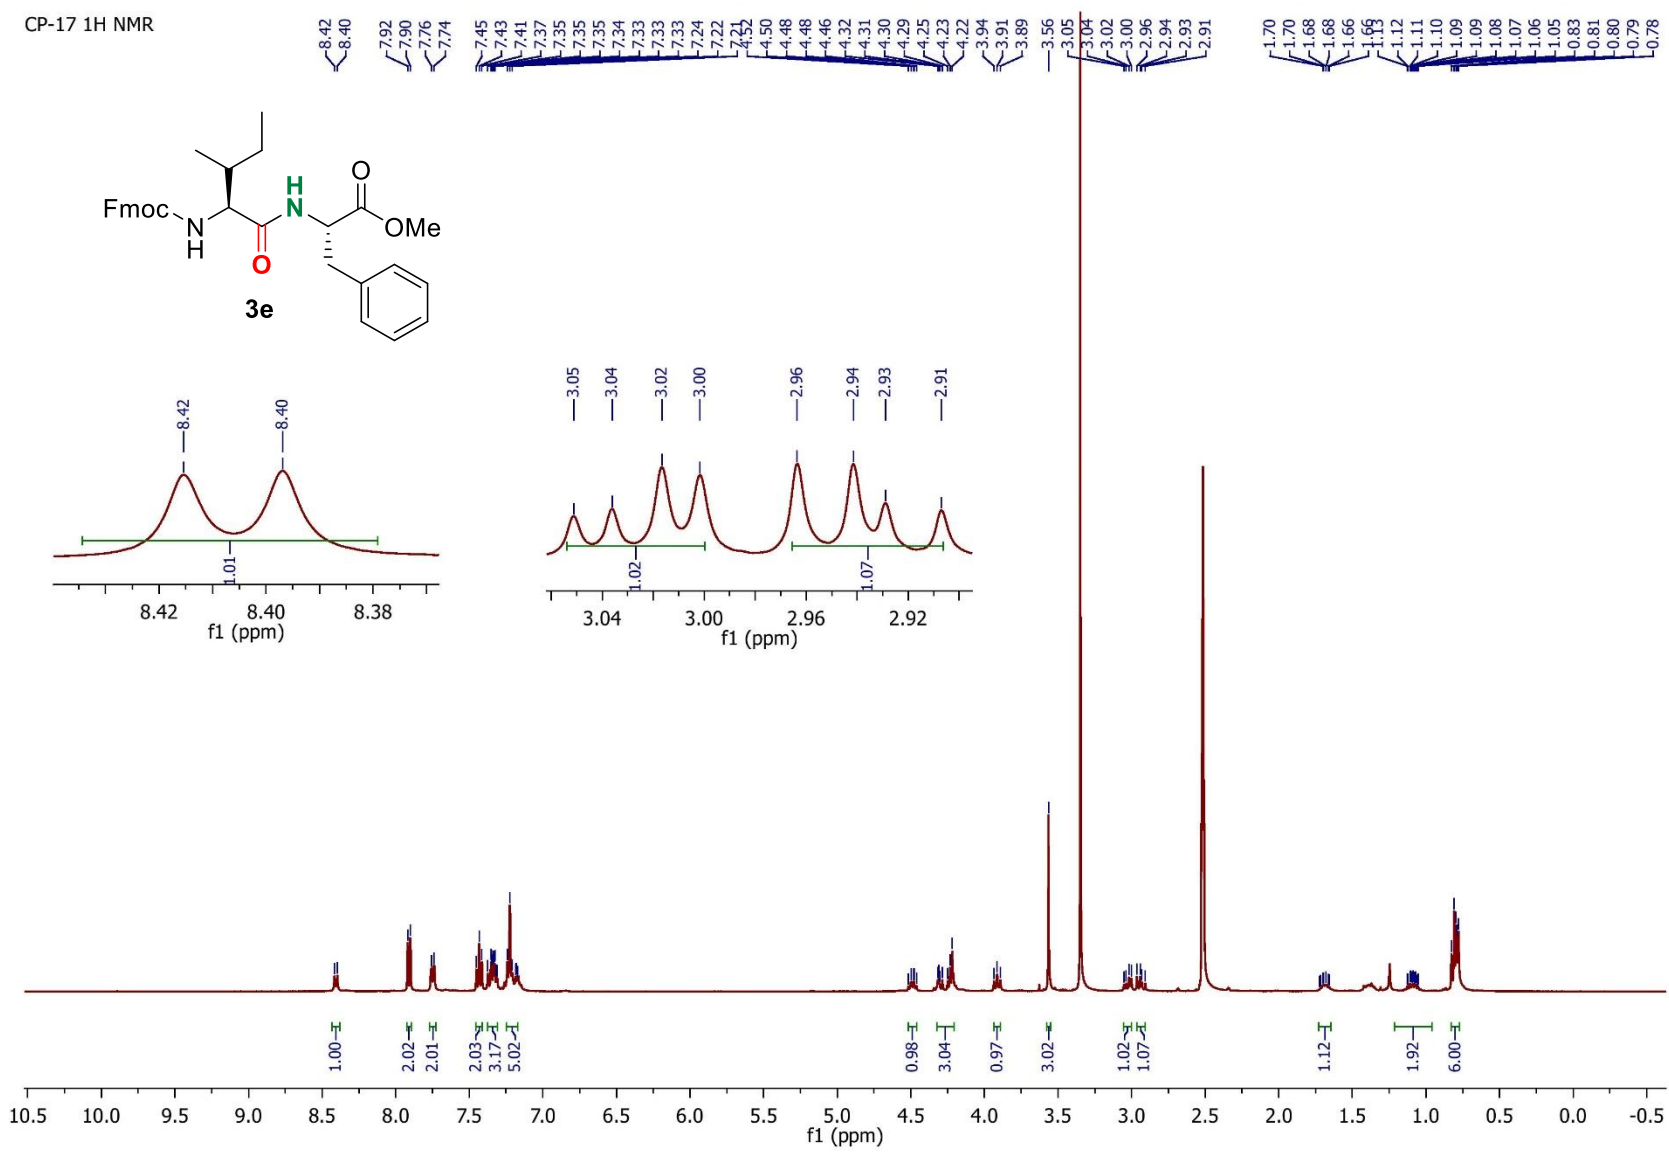

**Figure S23.** <sup>1</sup>H NMR Spectrum of **3e** (400MHz, DMSO-d<sub>6</sub>)

CP-17 <sup>13</sup>C NMR

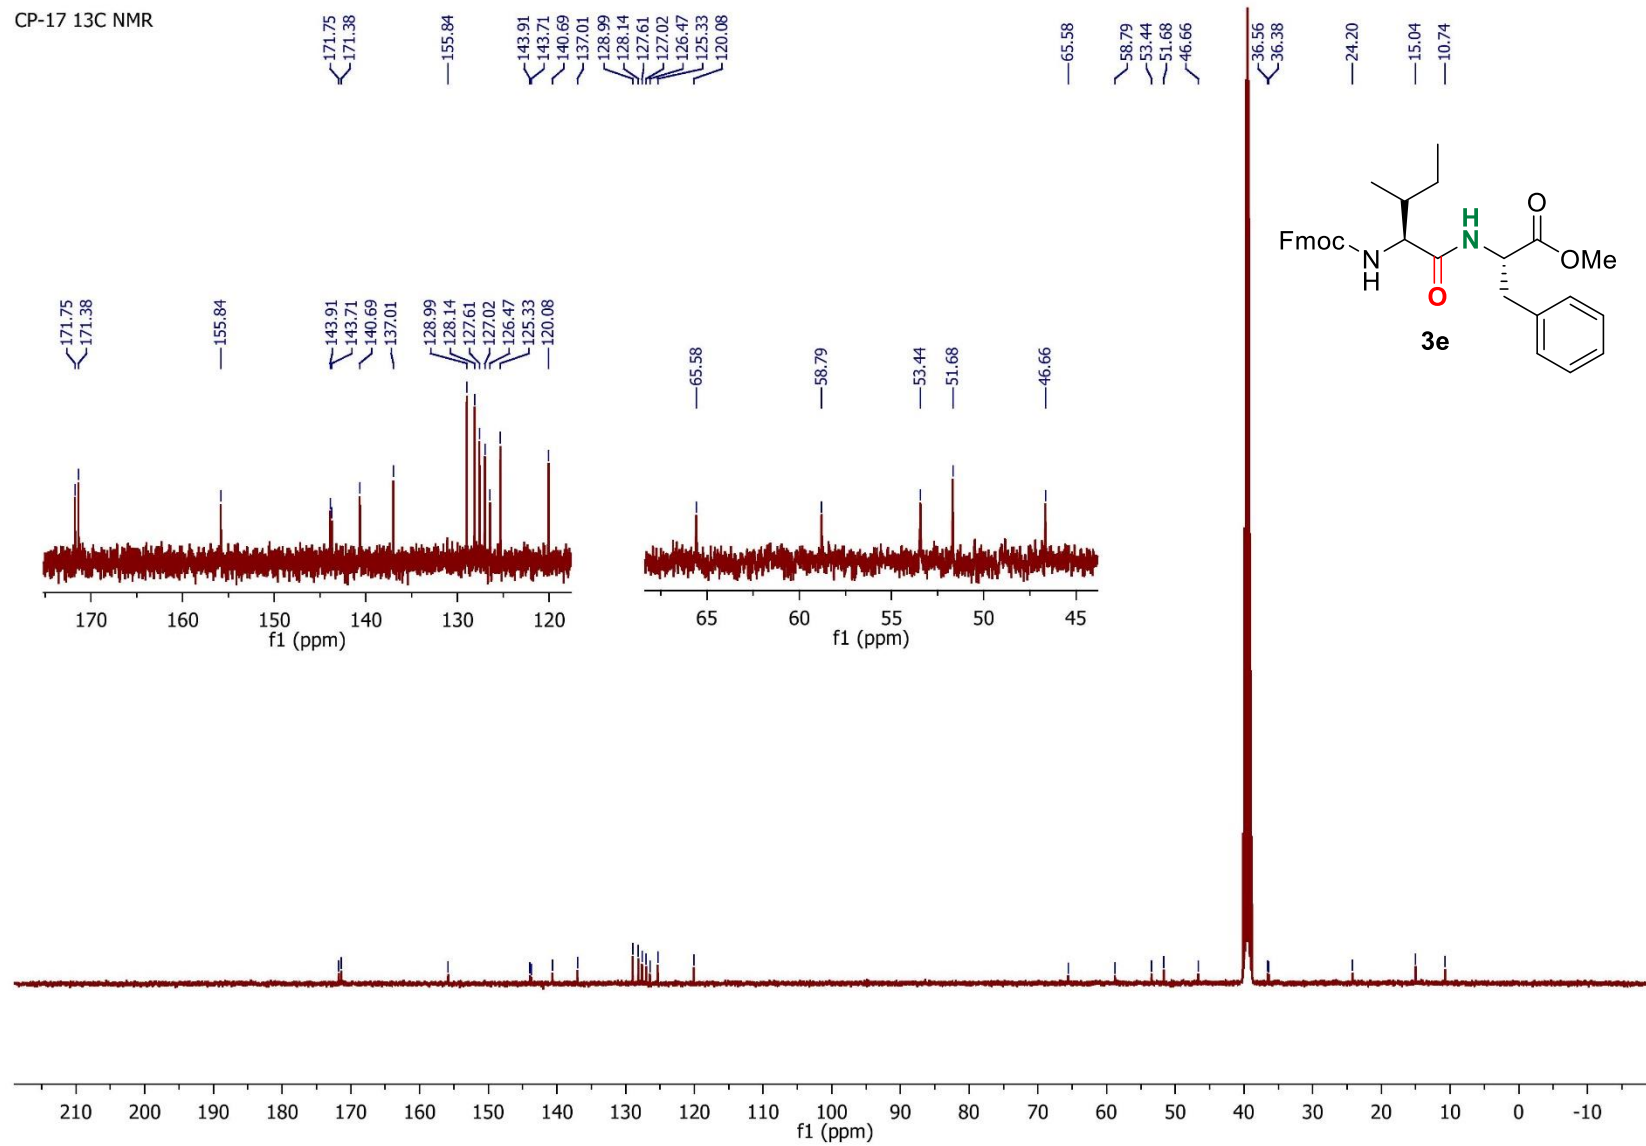

Figure S24. <sup>13</sup>C NMR Spectrum of 3e (101MHz, DMSO-d<sub>6</sub>)

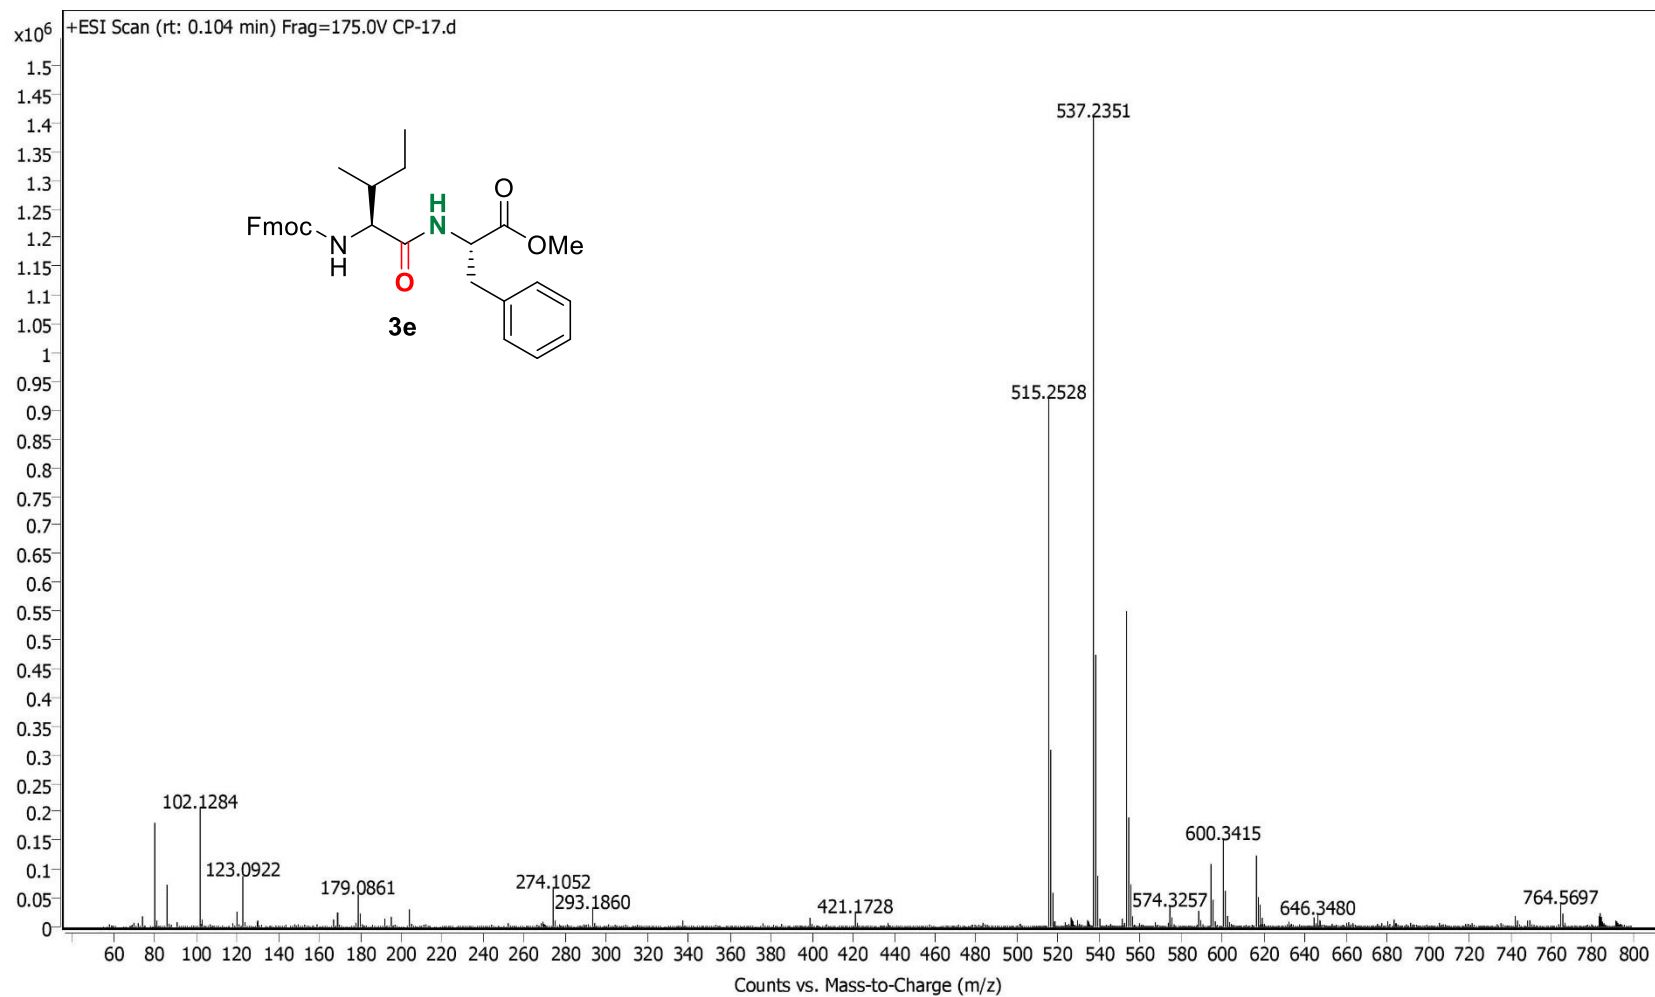

**Figure S25.** HRMS Spectrum of **3e**



CP-20 1H NMR

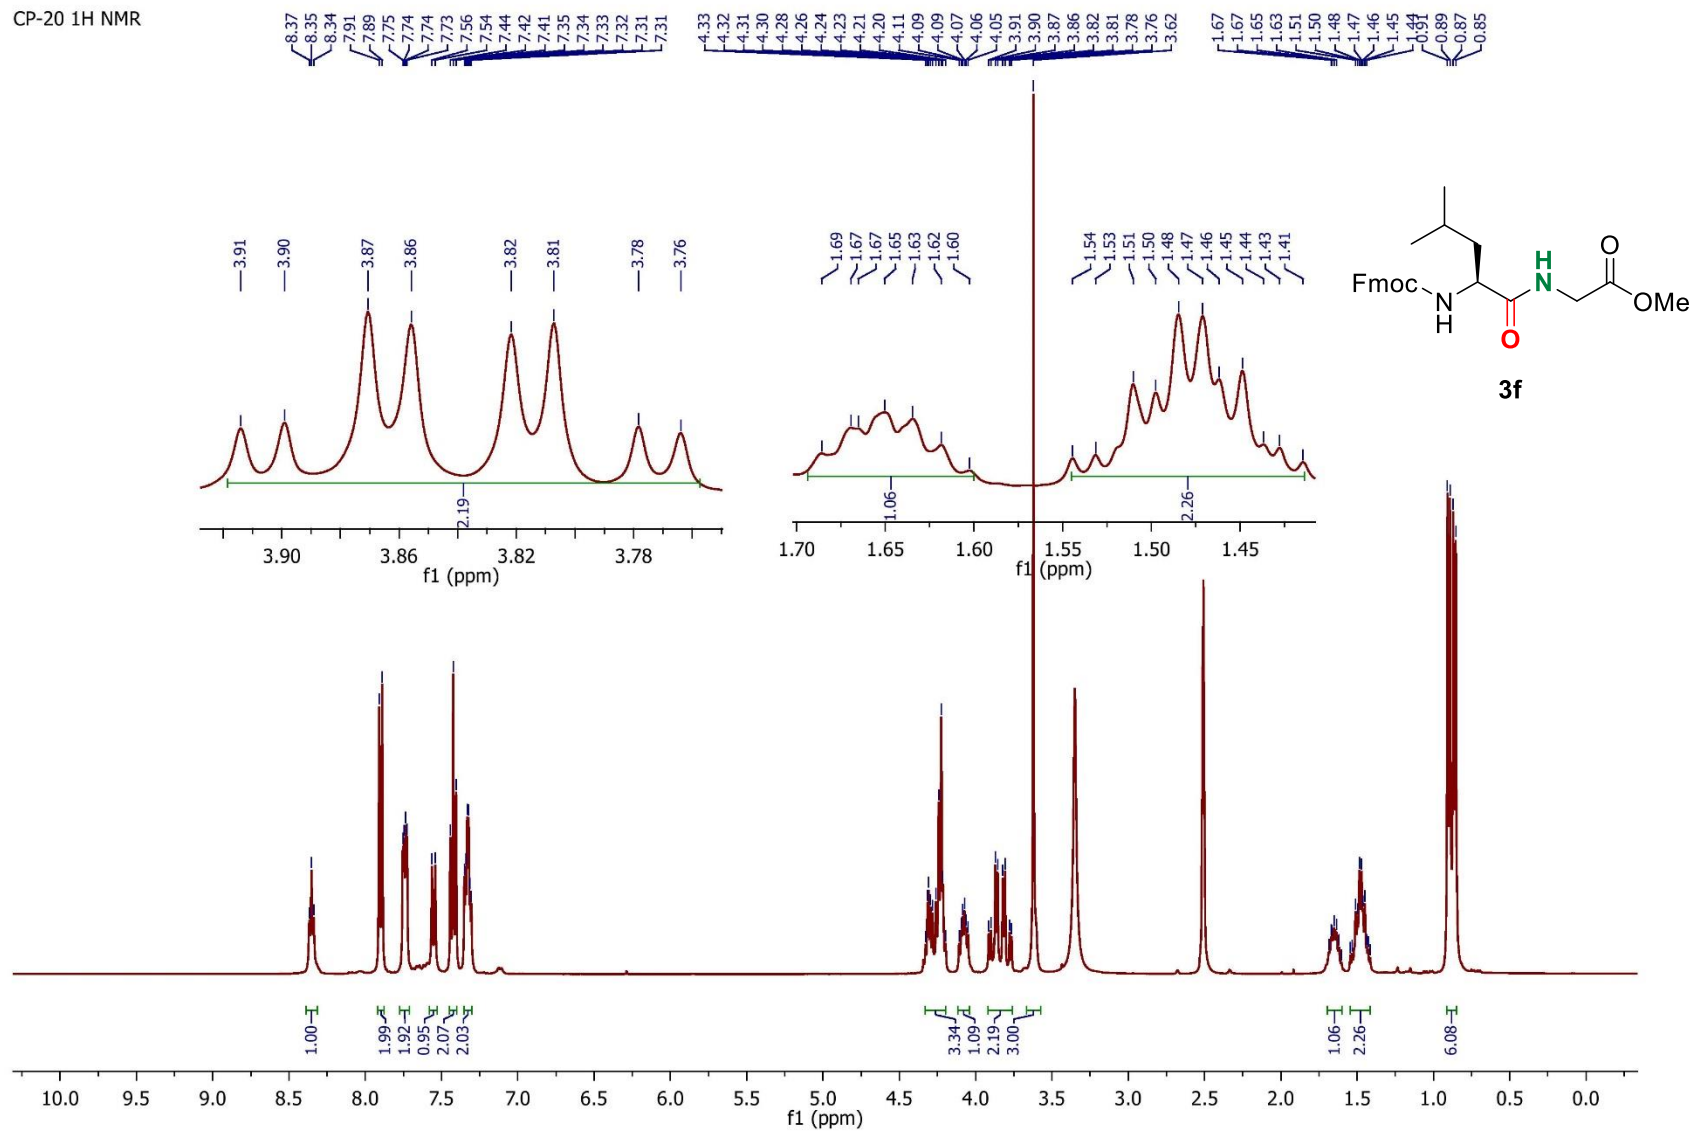

Figure S26. <sup>1</sup>H NMR Spectrum of **3f** (400MHz, DMSO-d<sub>6</sub>)

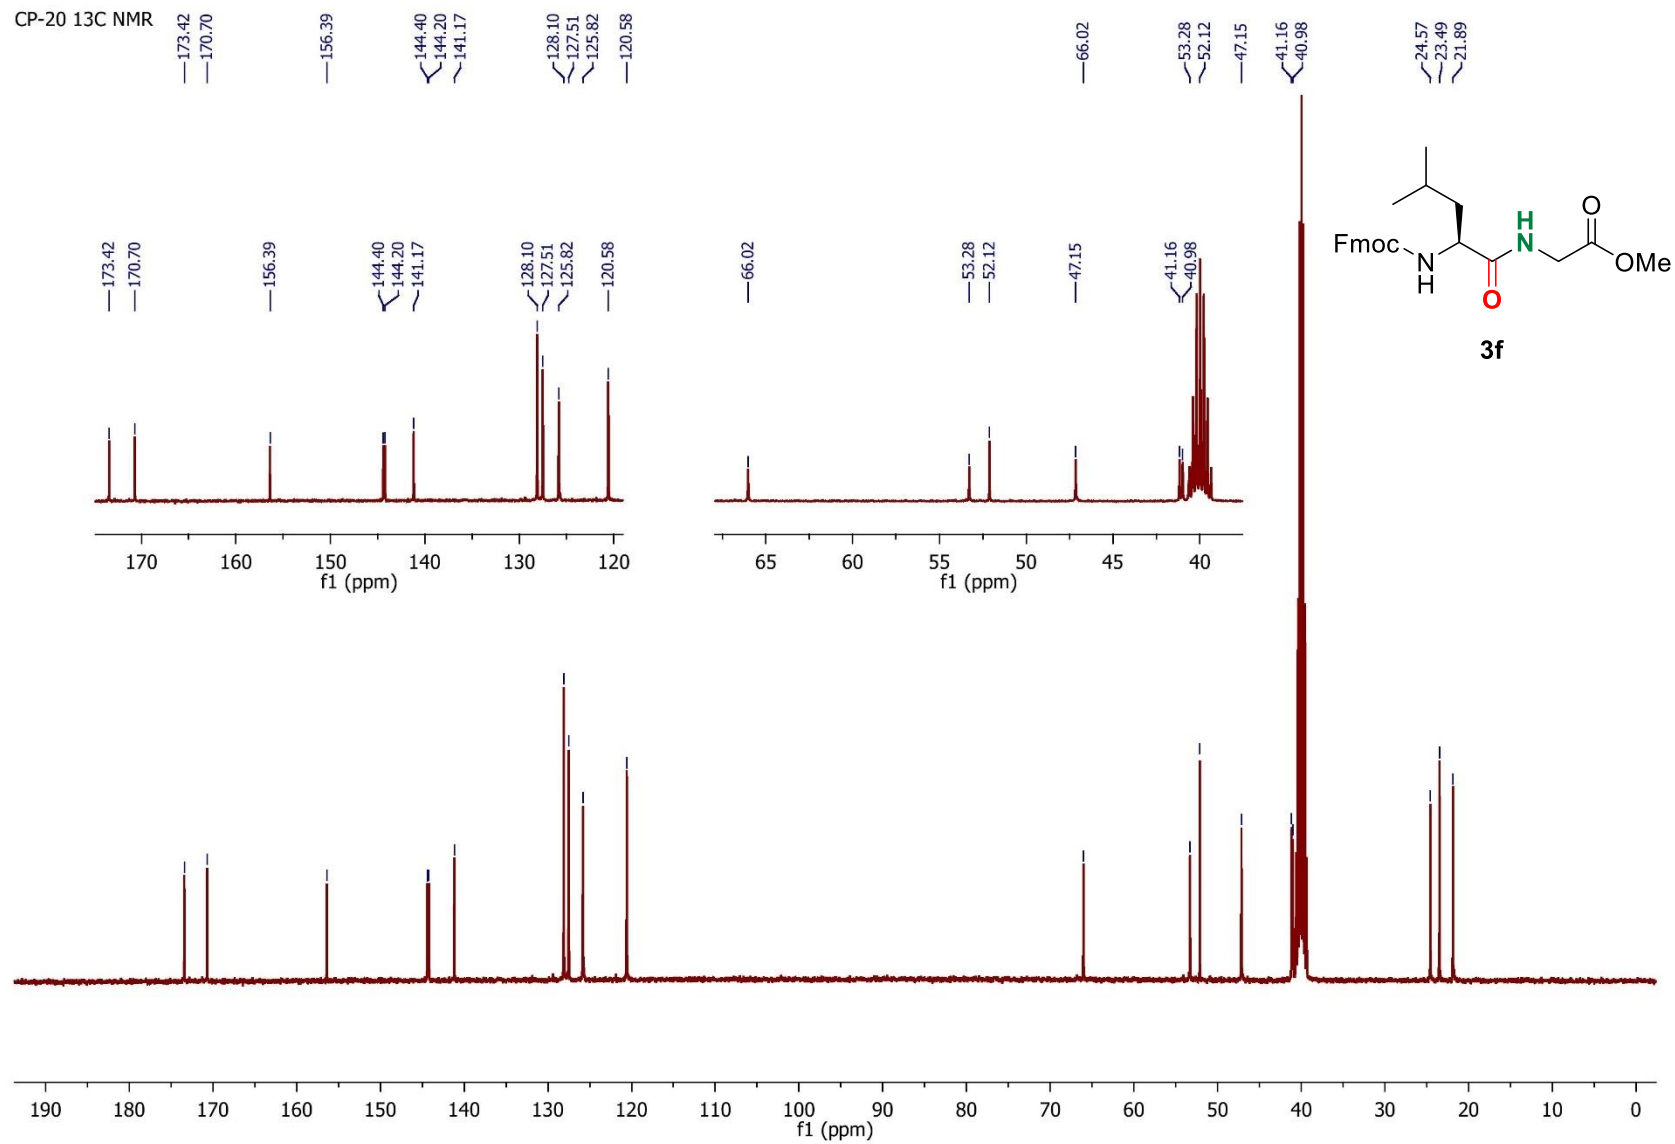

**Figure S27.**  $^{13}\text{C}$  NMR Spectrum of **3f** (101MHz, DMSO- $d_6$ )

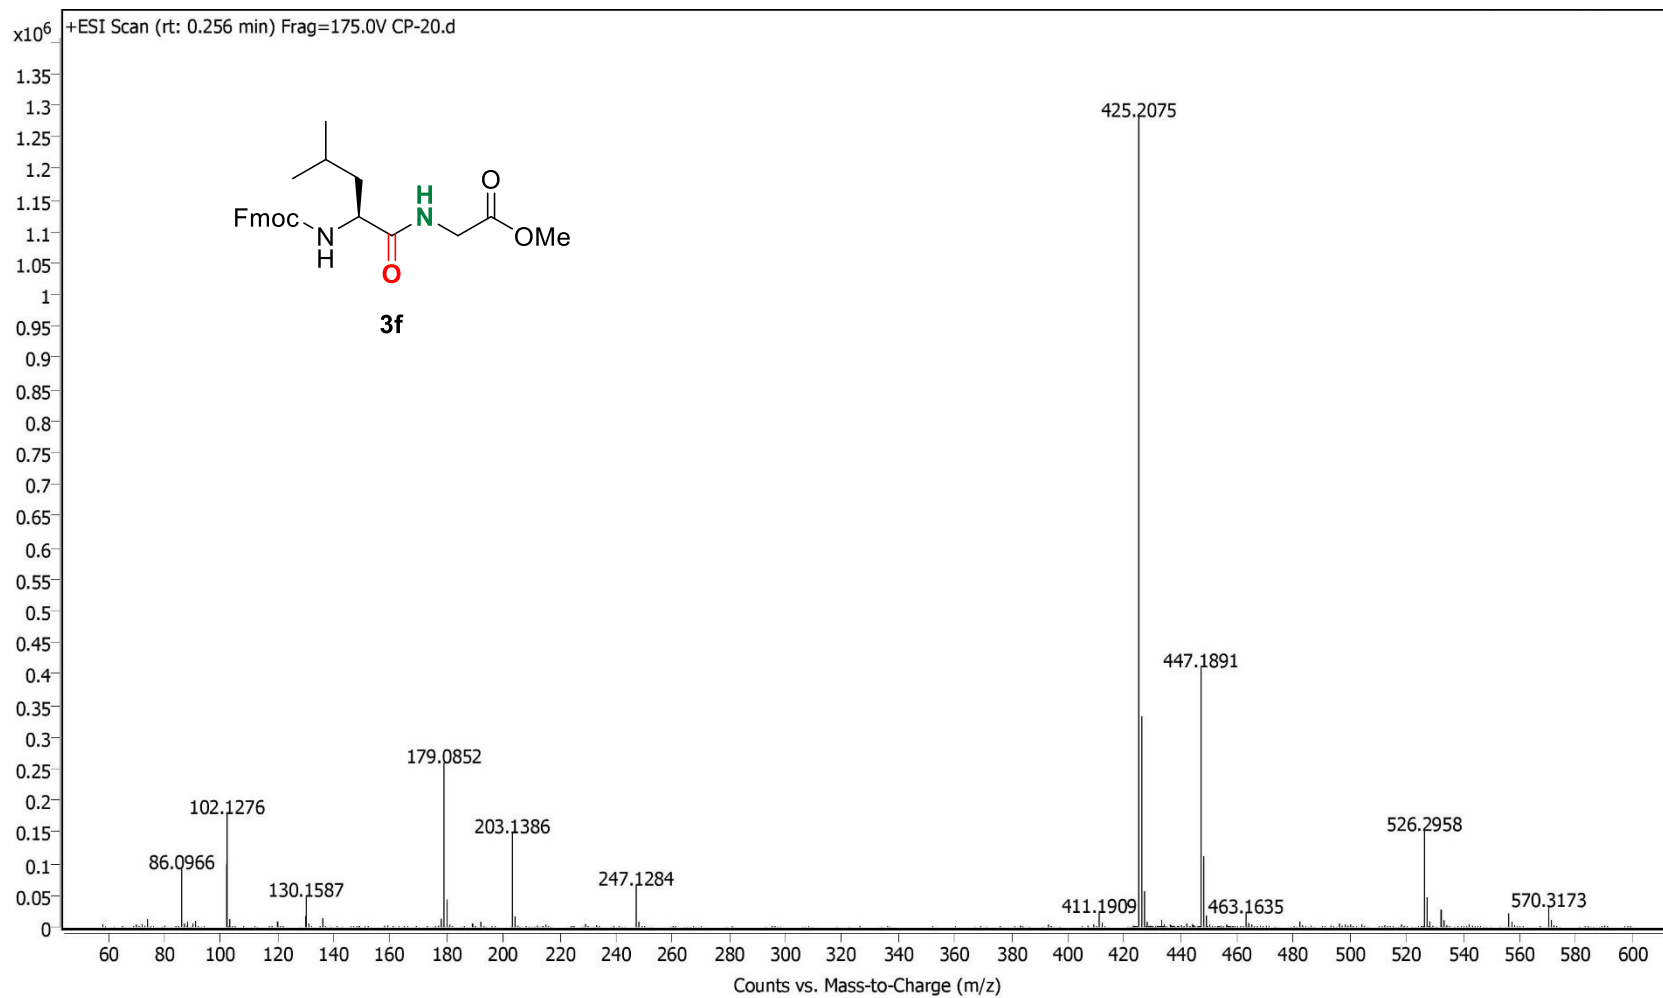

**Figure S28.** HRMS Spectrum of **3f**

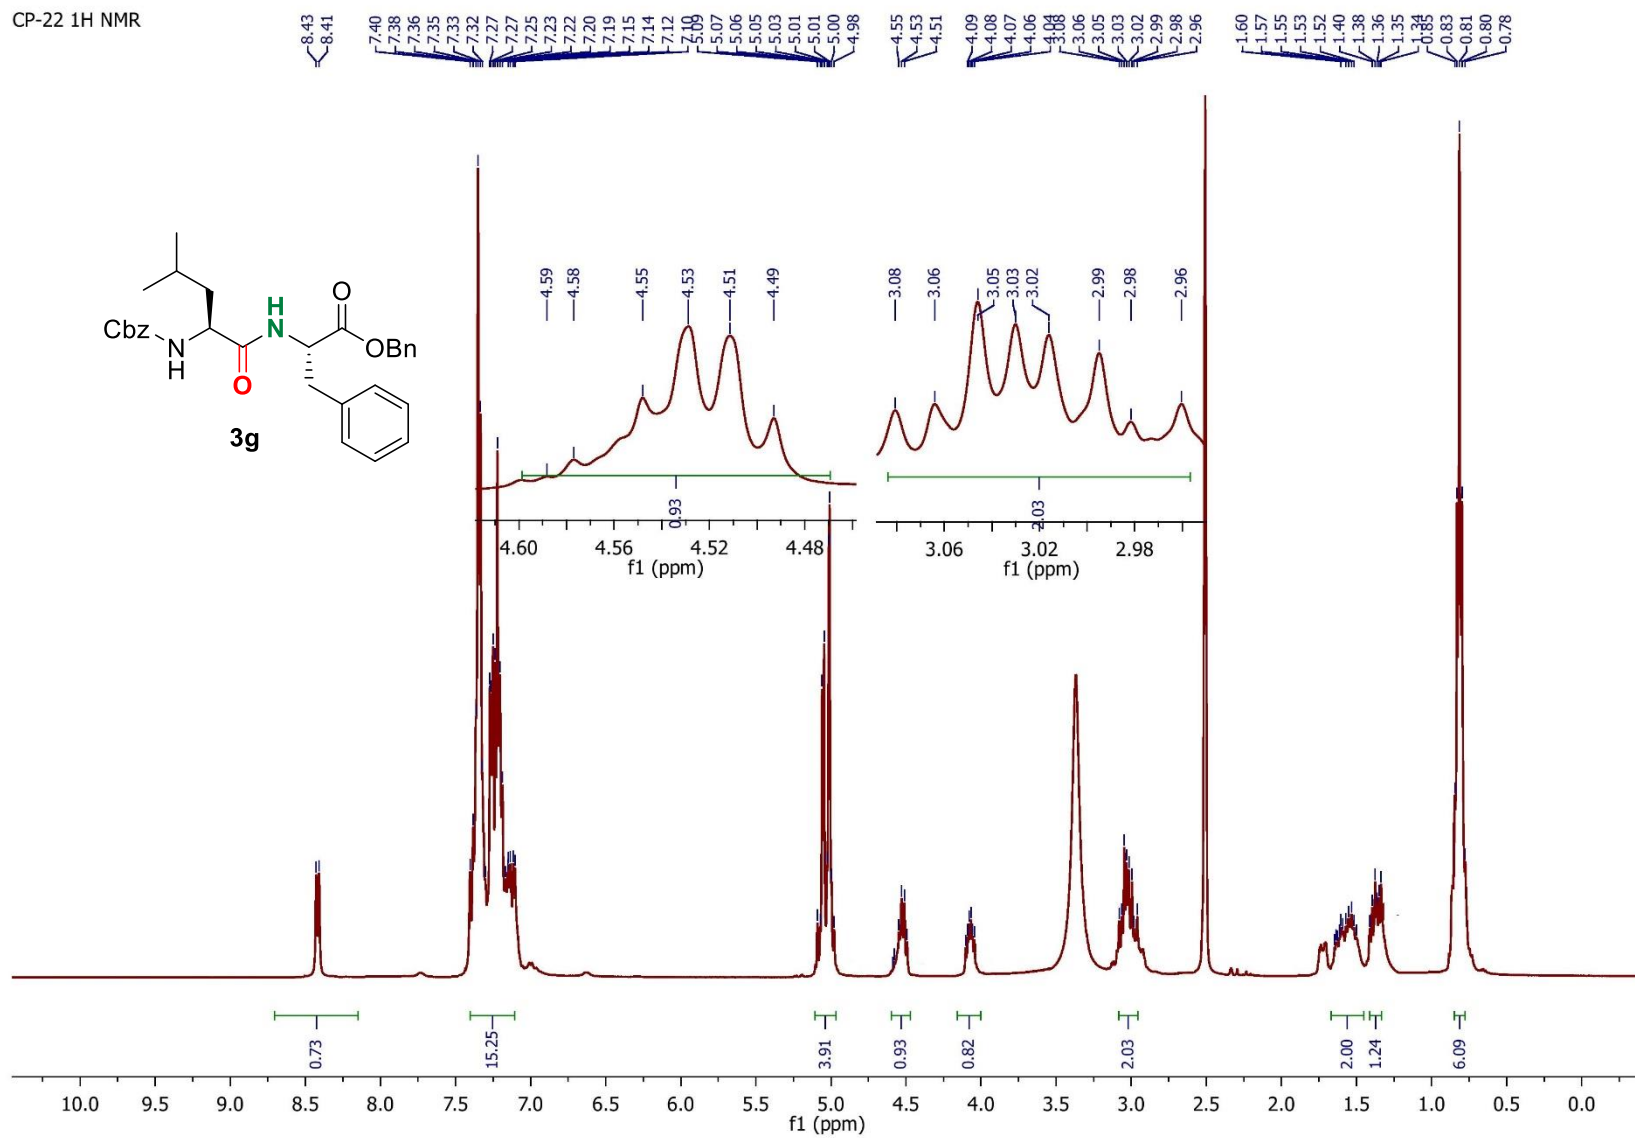

Figure S29.  $^1\text{H}$  NMR Spectrum of **3g** (400MHz,  $\text{DMSO-d}_6$ )

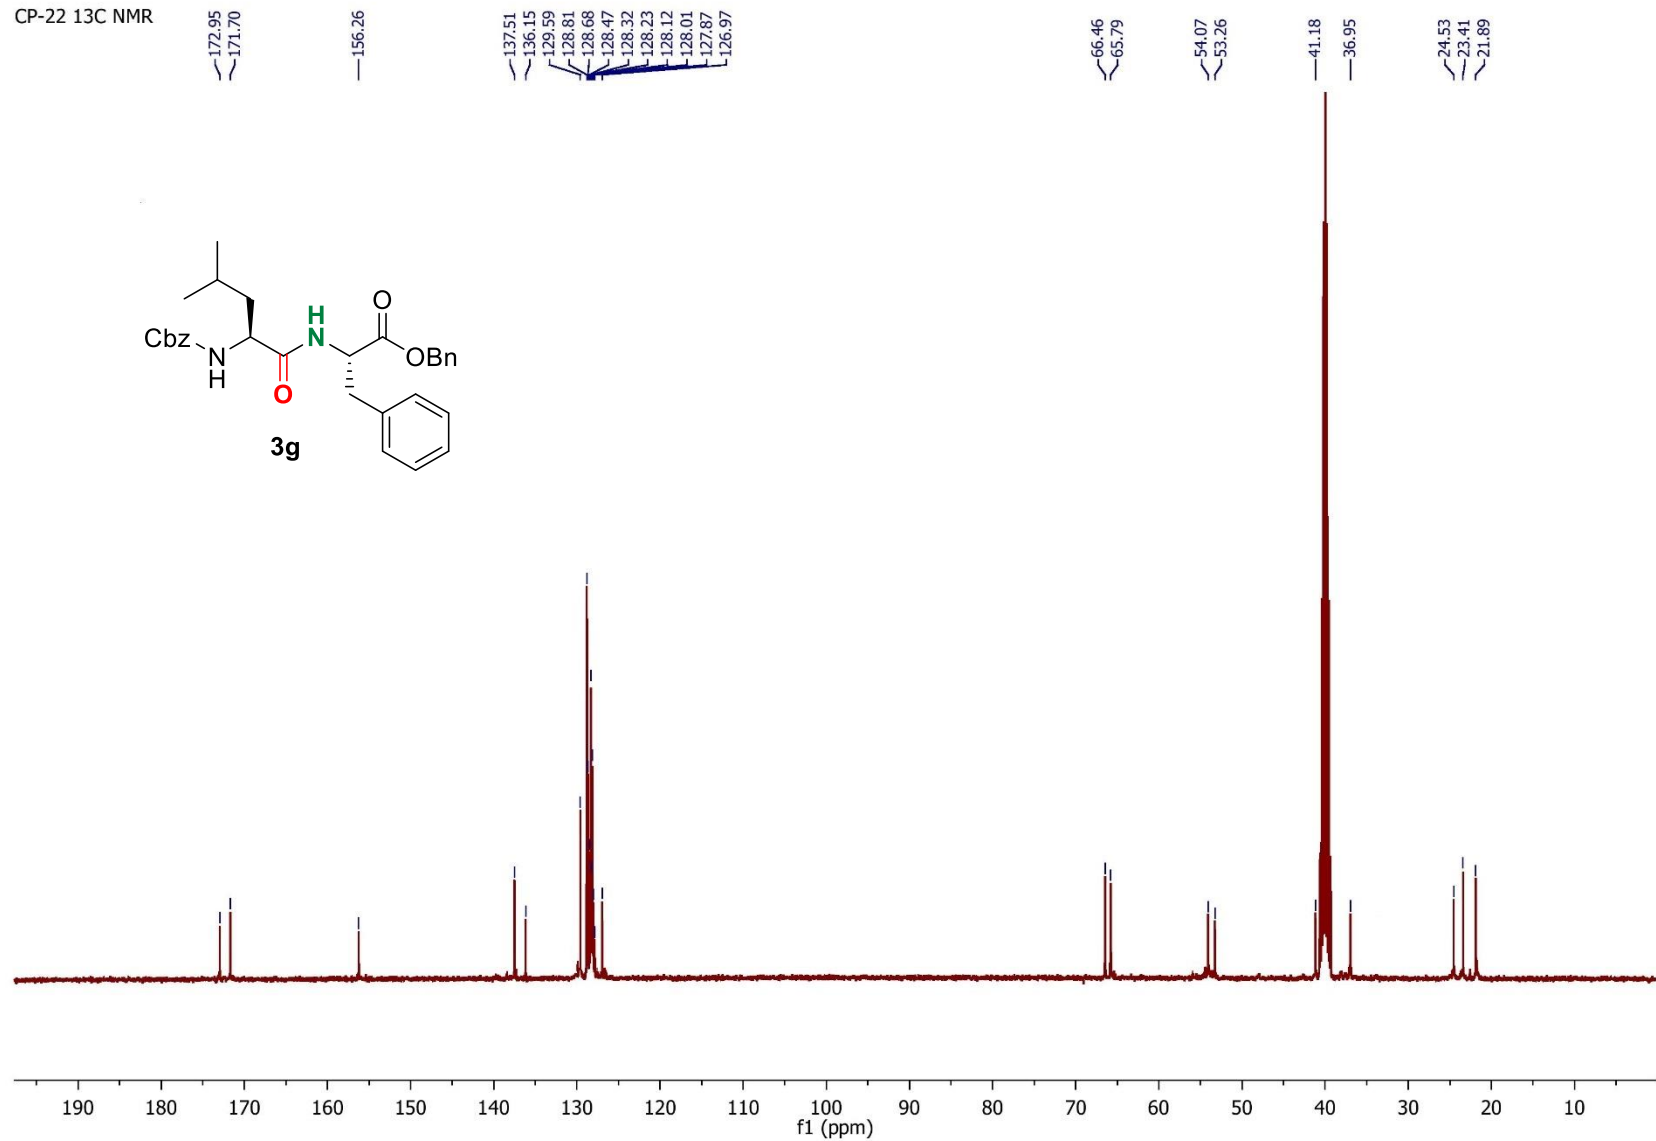

Figure S30. <sup>13</sup>C NMR Spectrum of 3g (101MHz, DMSO-d<sub>6</sub>)

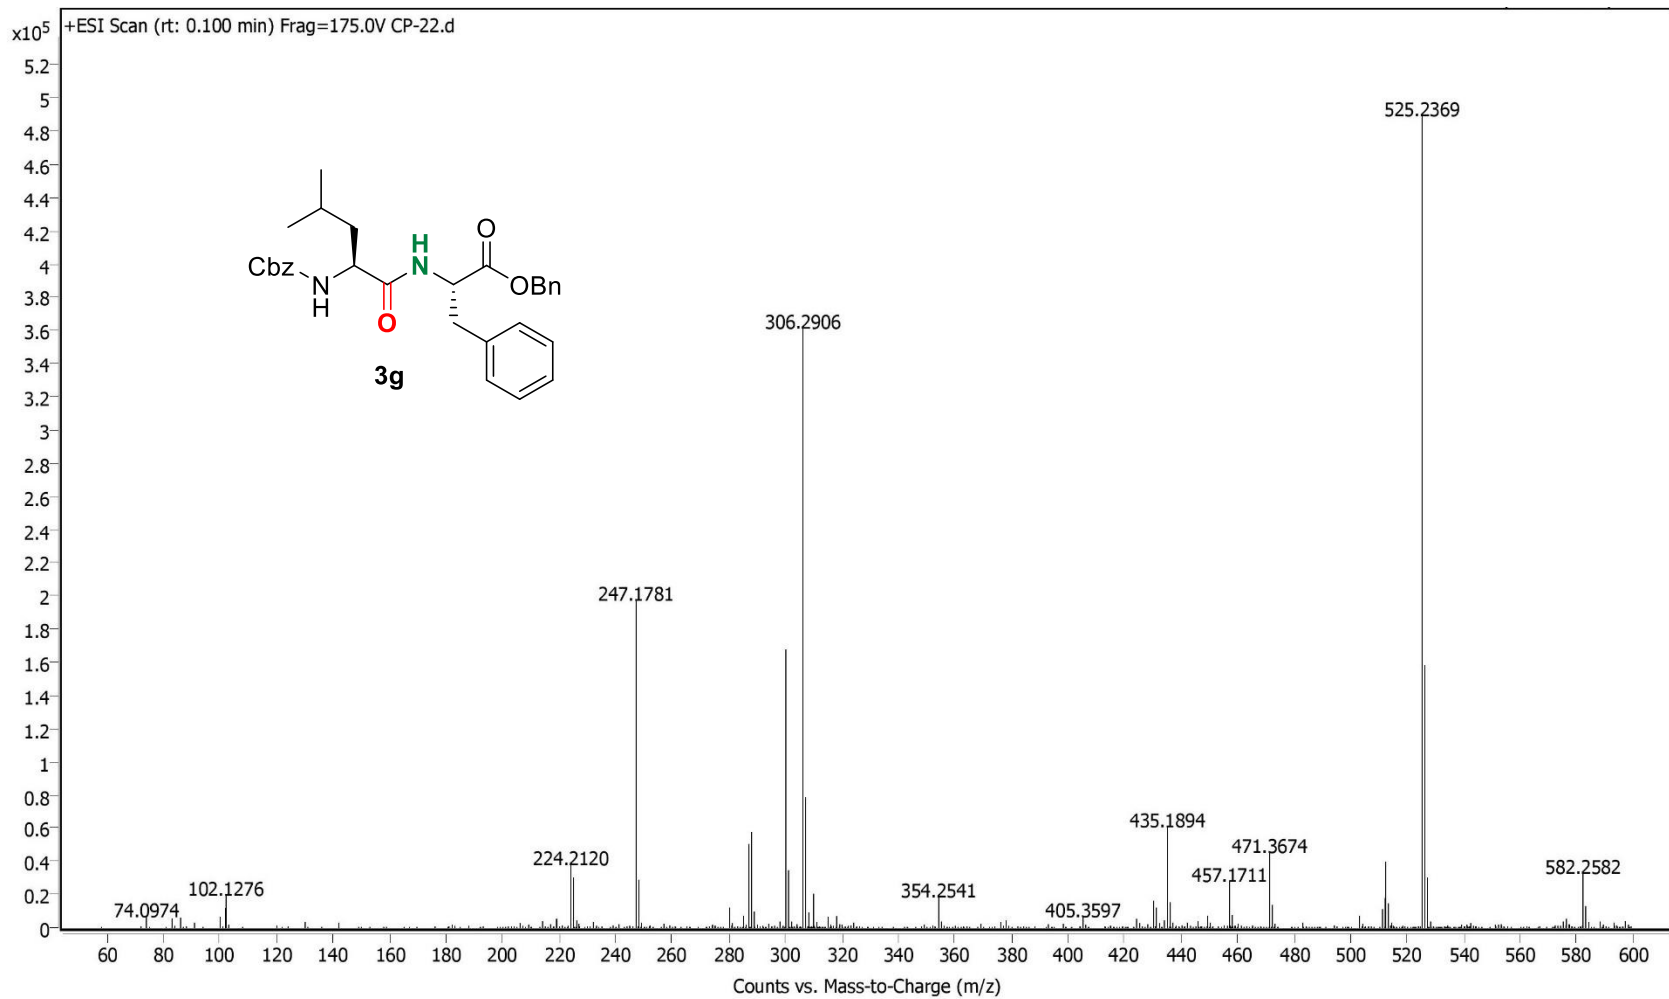

**Figure S31.** HRMS Spectrum of **3g**

CP-10 1H NMR

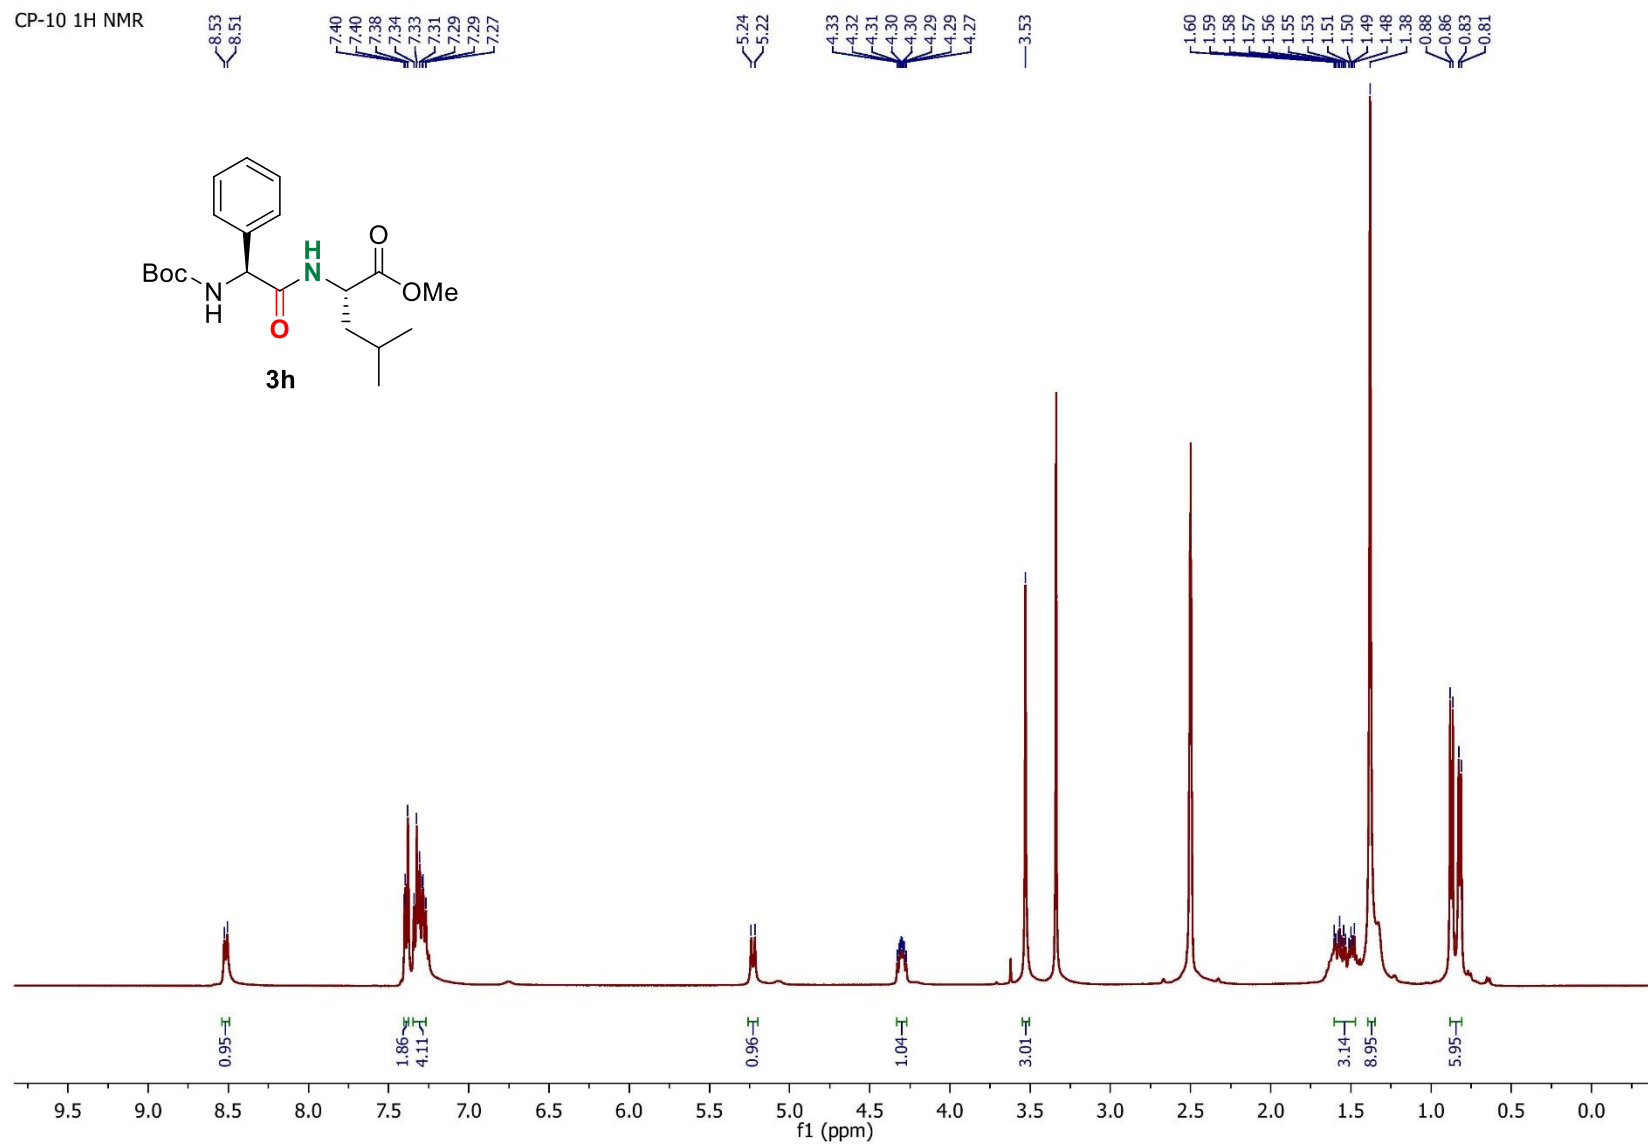

Figure S32. <sup>1</sup>H NMR Spectrum of **3h** (400MHz, DMSO-d<sub>6</sub>)

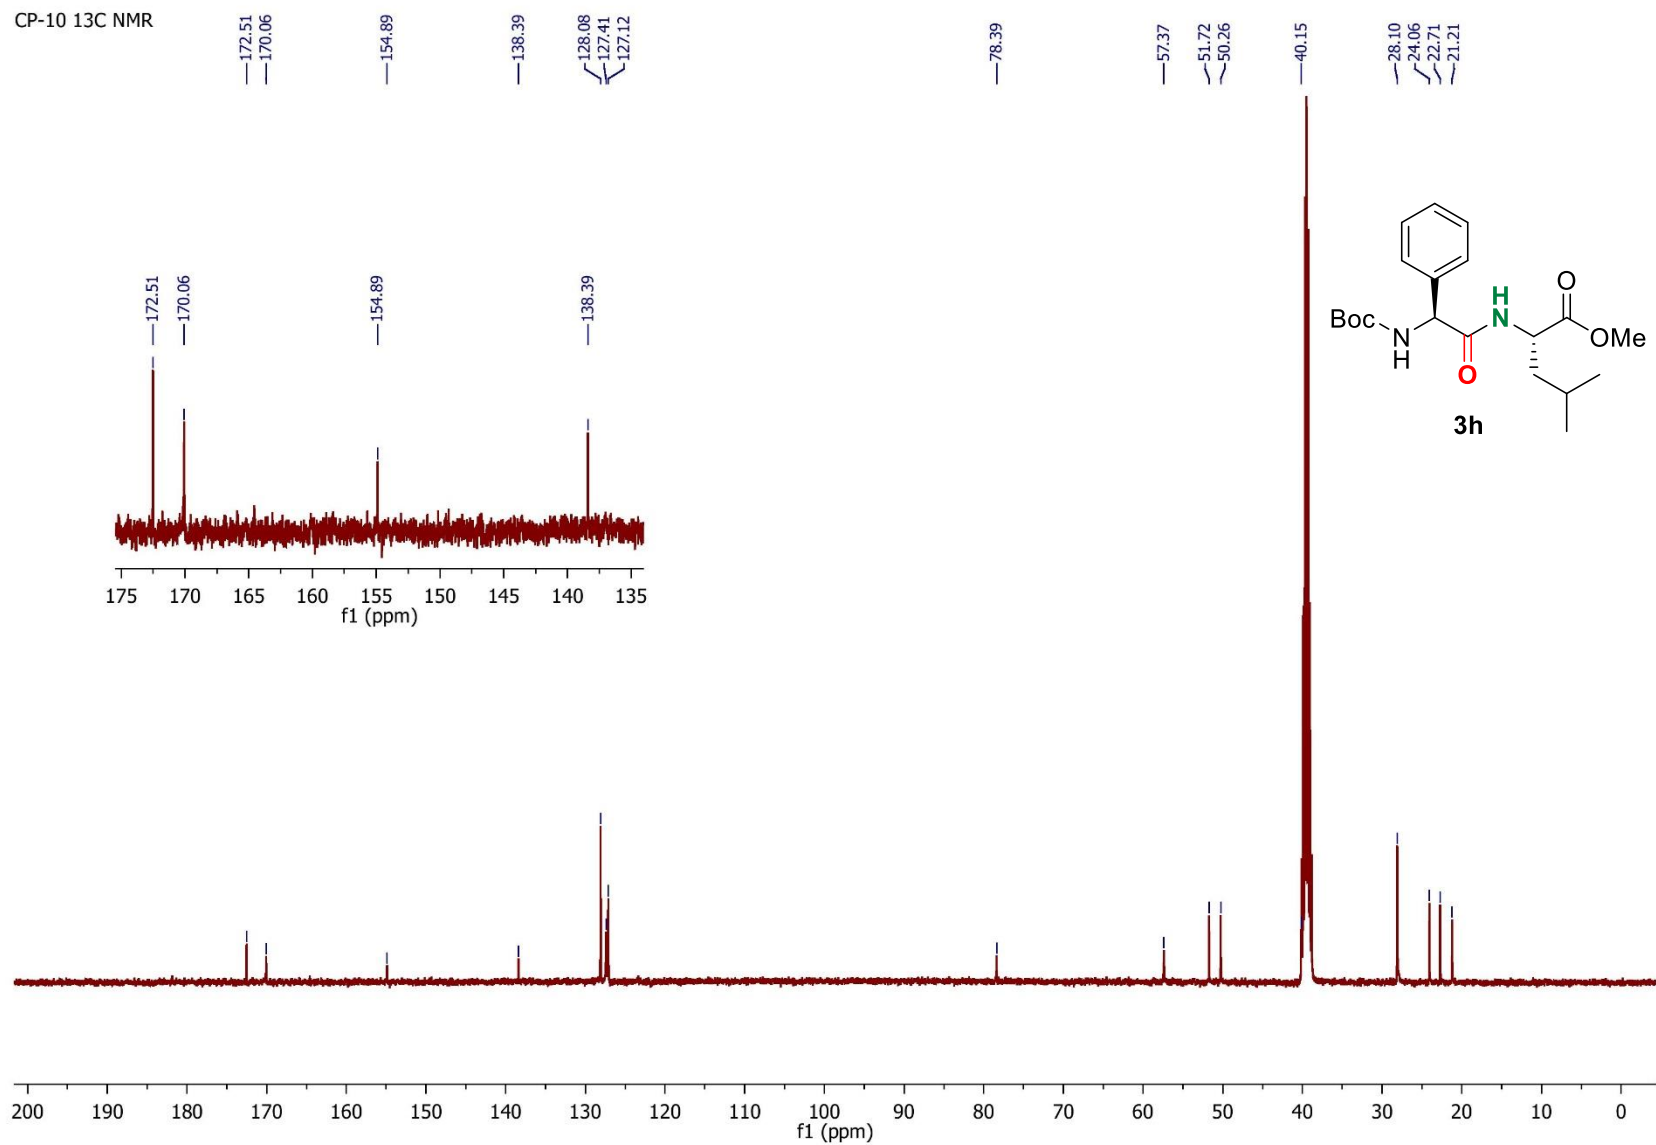

**Figure S33.**  $^{13}\text{C}$  NMR Spectrum of **3h** (101MHz,  $\text{DMSO-d}_6$ )



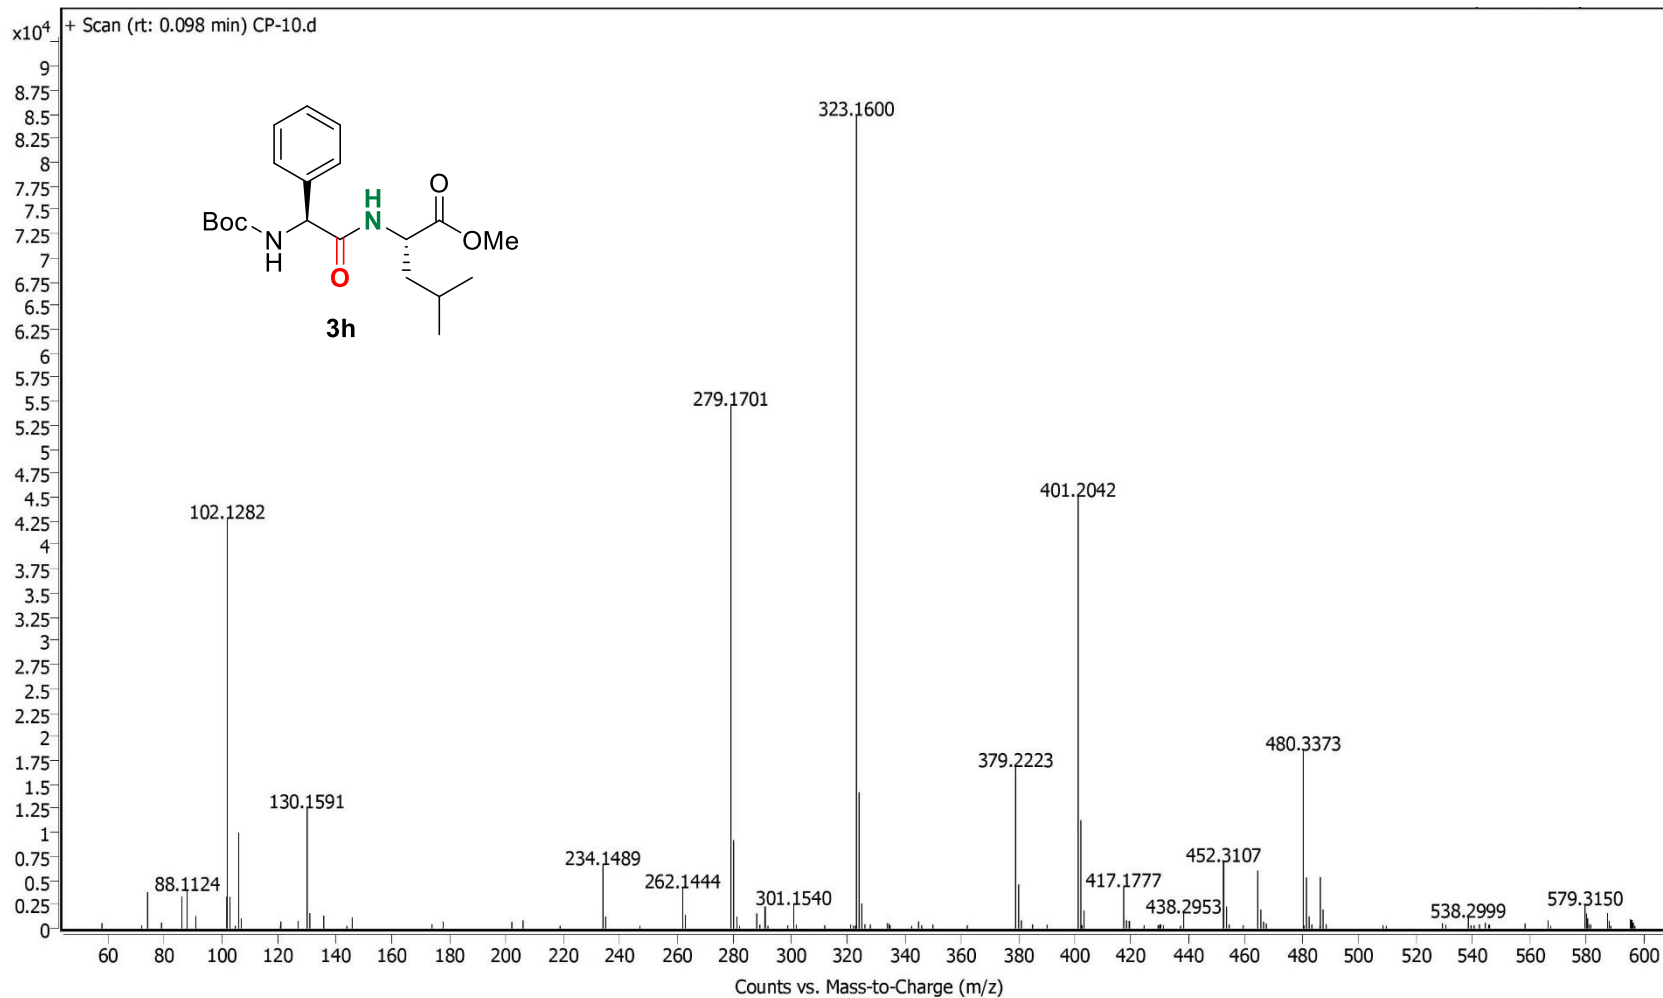

**Figure S34.** HRMS Spectrum of **3h**

CP-10 (D) 1H NMR

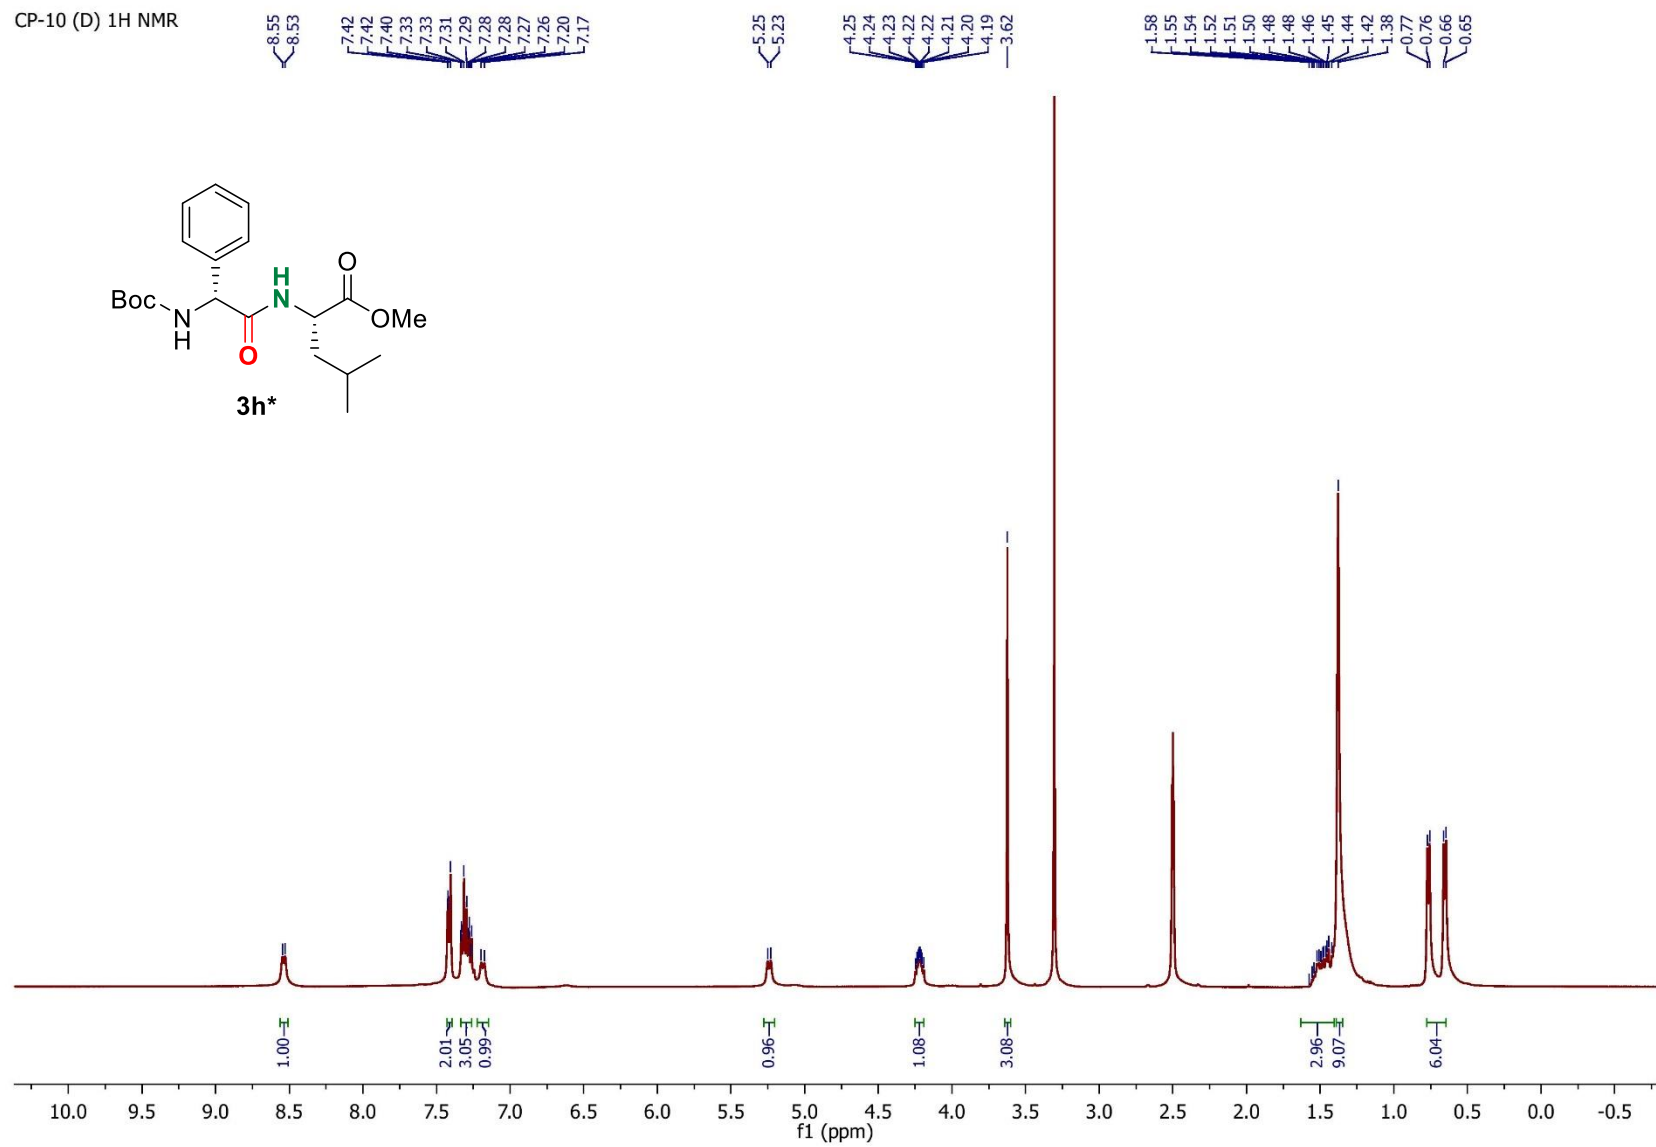

Figure S35. <sup>1</sup>H NMR Spectrum of **3h\*** (400MHz, DMSO-d<sub>6</sub>)

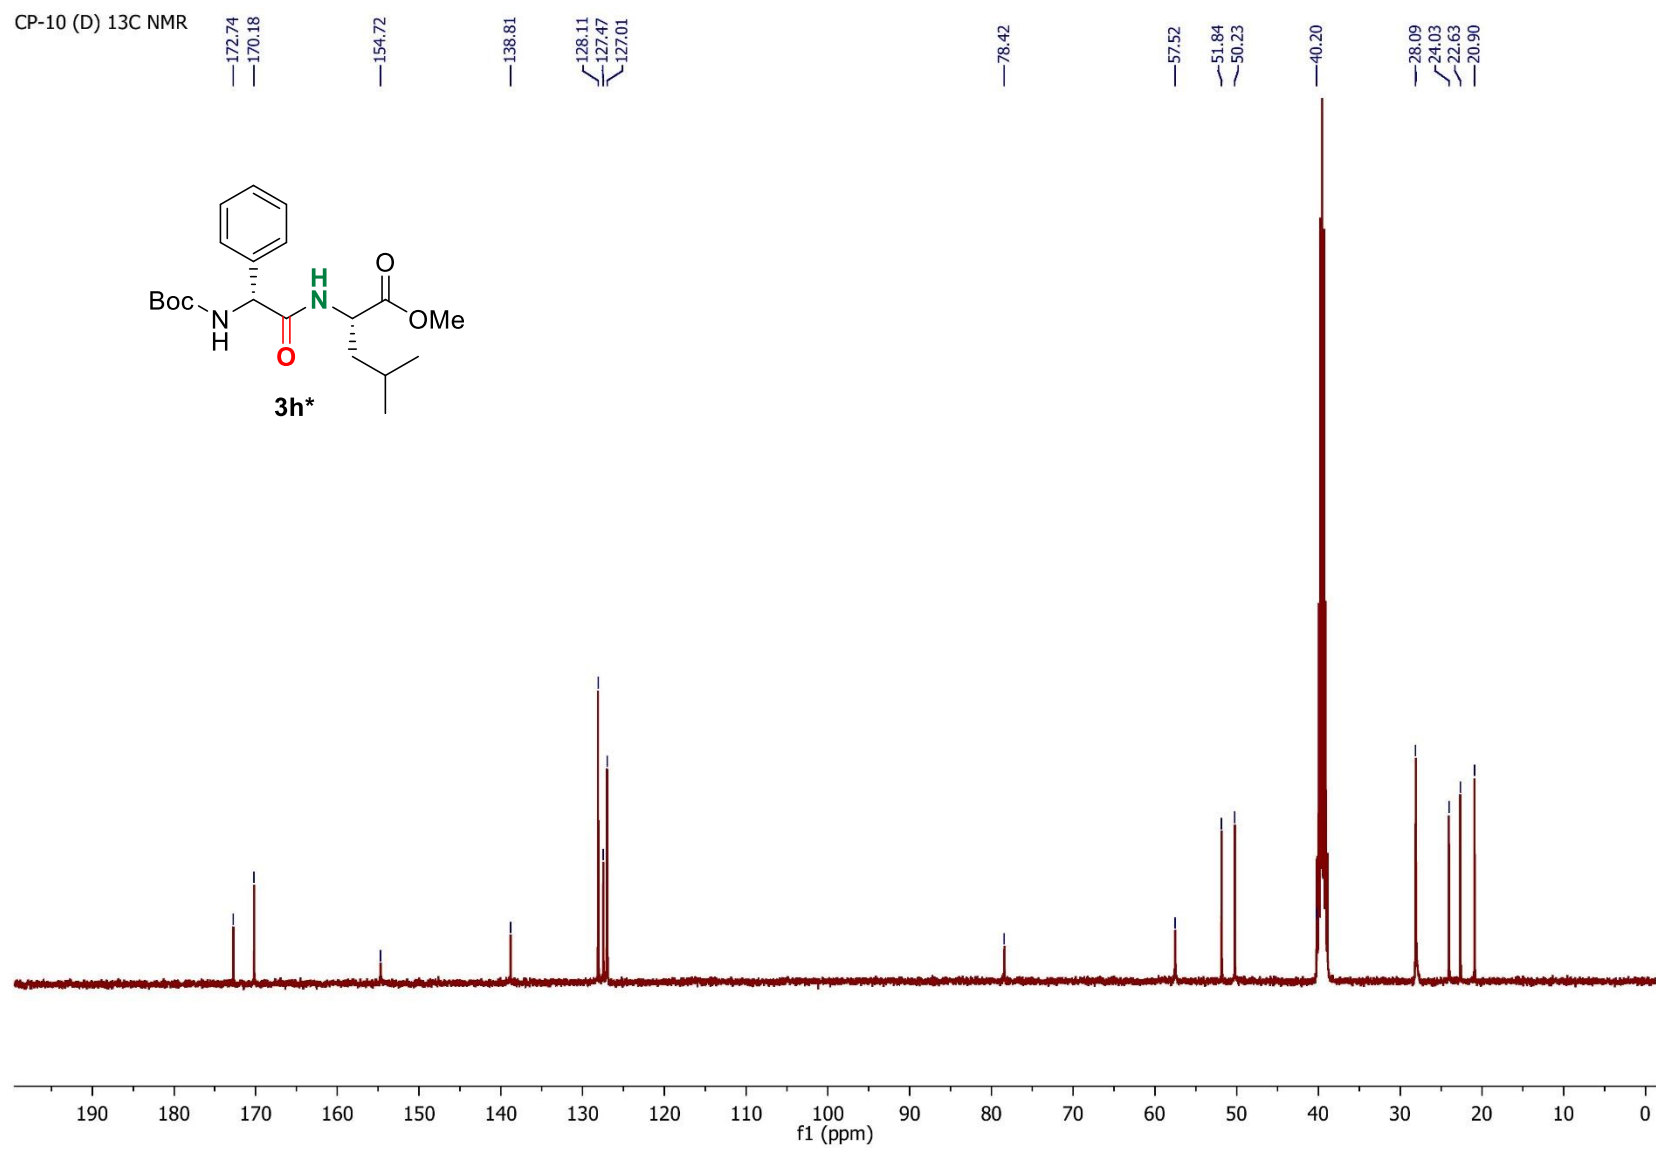

**Figure S36.**  $^{13}\text{C}$  NMR Spectrum of **3h\*** (101MHz, DMSO- $\text{d}_6$ )

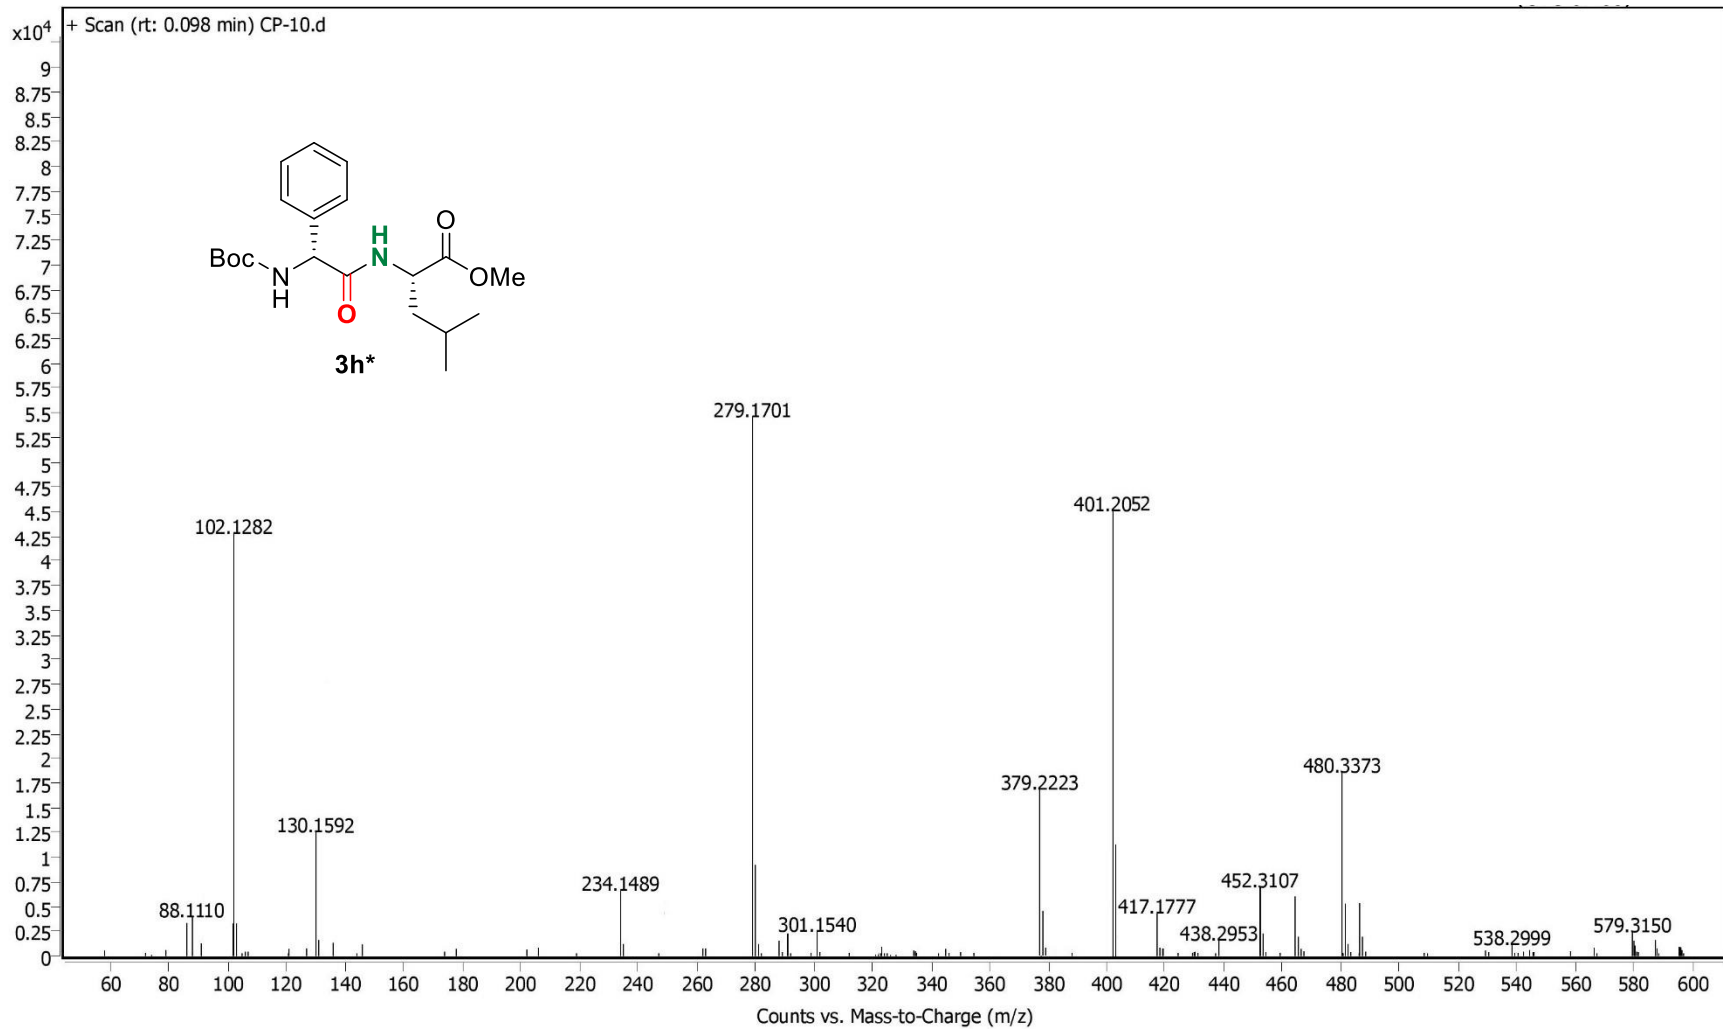

**Figure S37.** HRMS Spectrum of **3h\***

CP-5 1H NMR

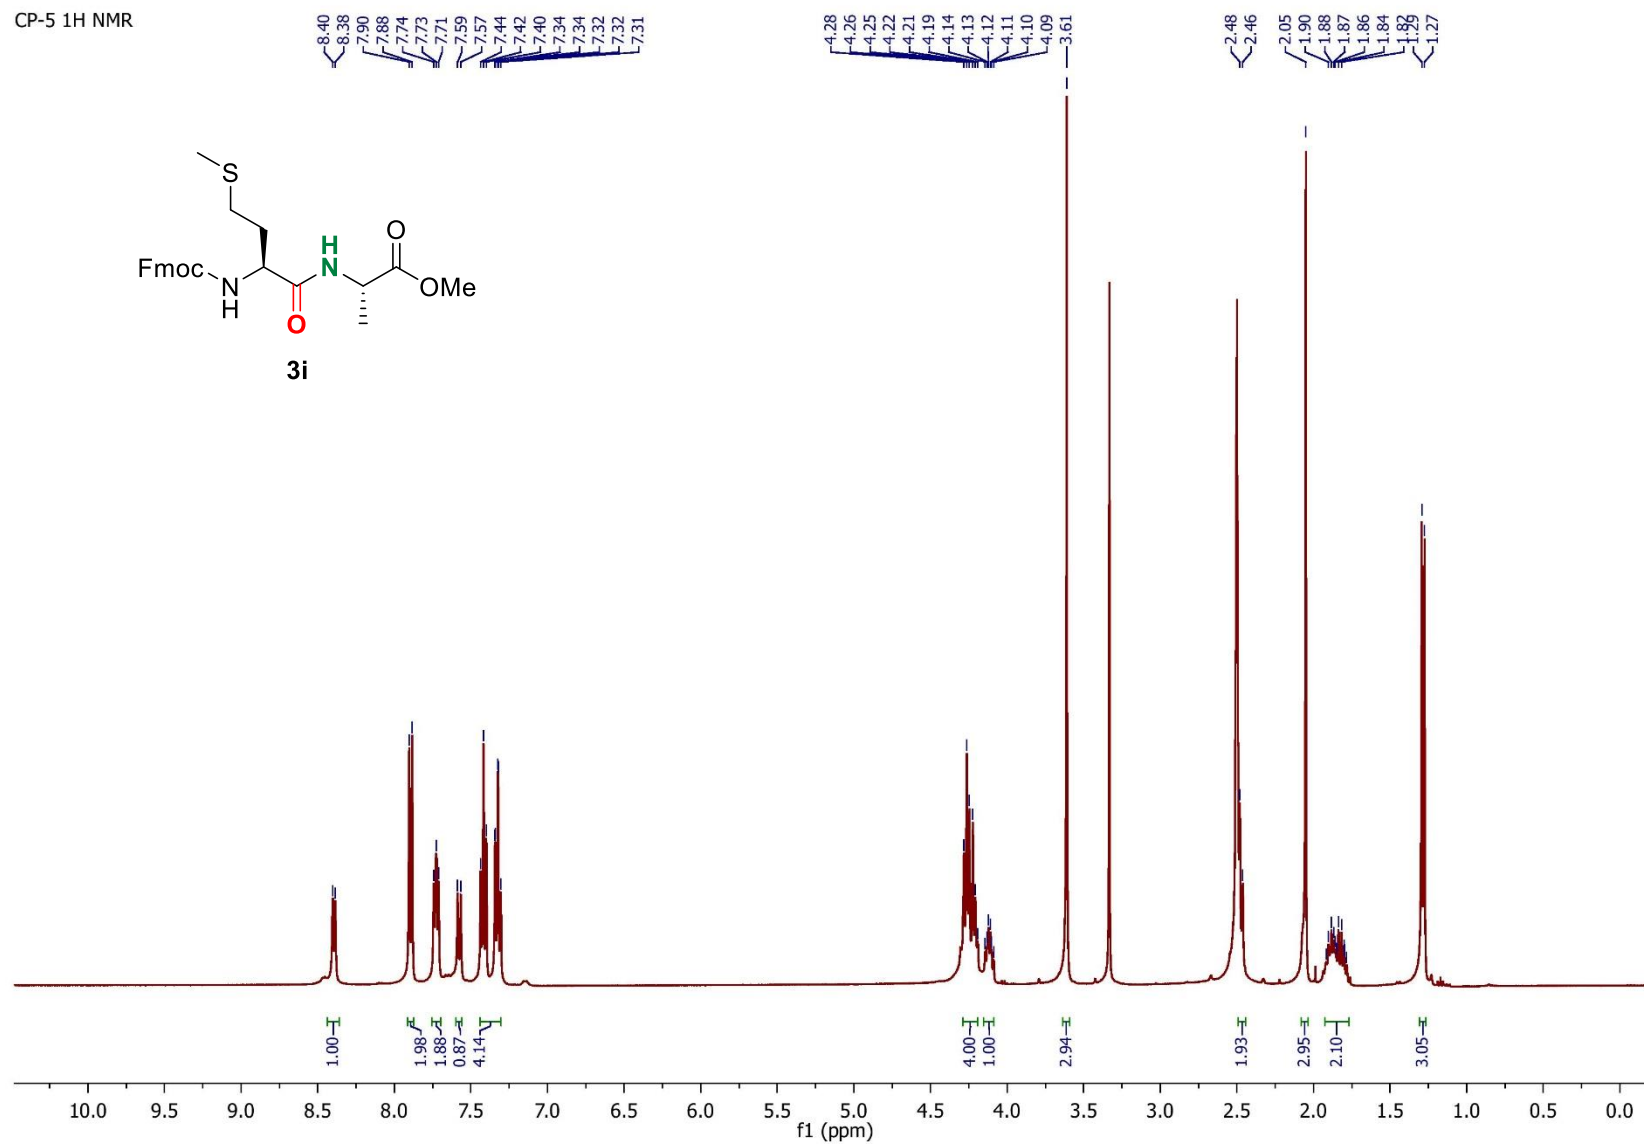

Figure S38. <sup>1</sup>H NMR Spectrum of **3i** (400MHz, DMSO-d<sub>6</sub>)

CP-5 13C NMR

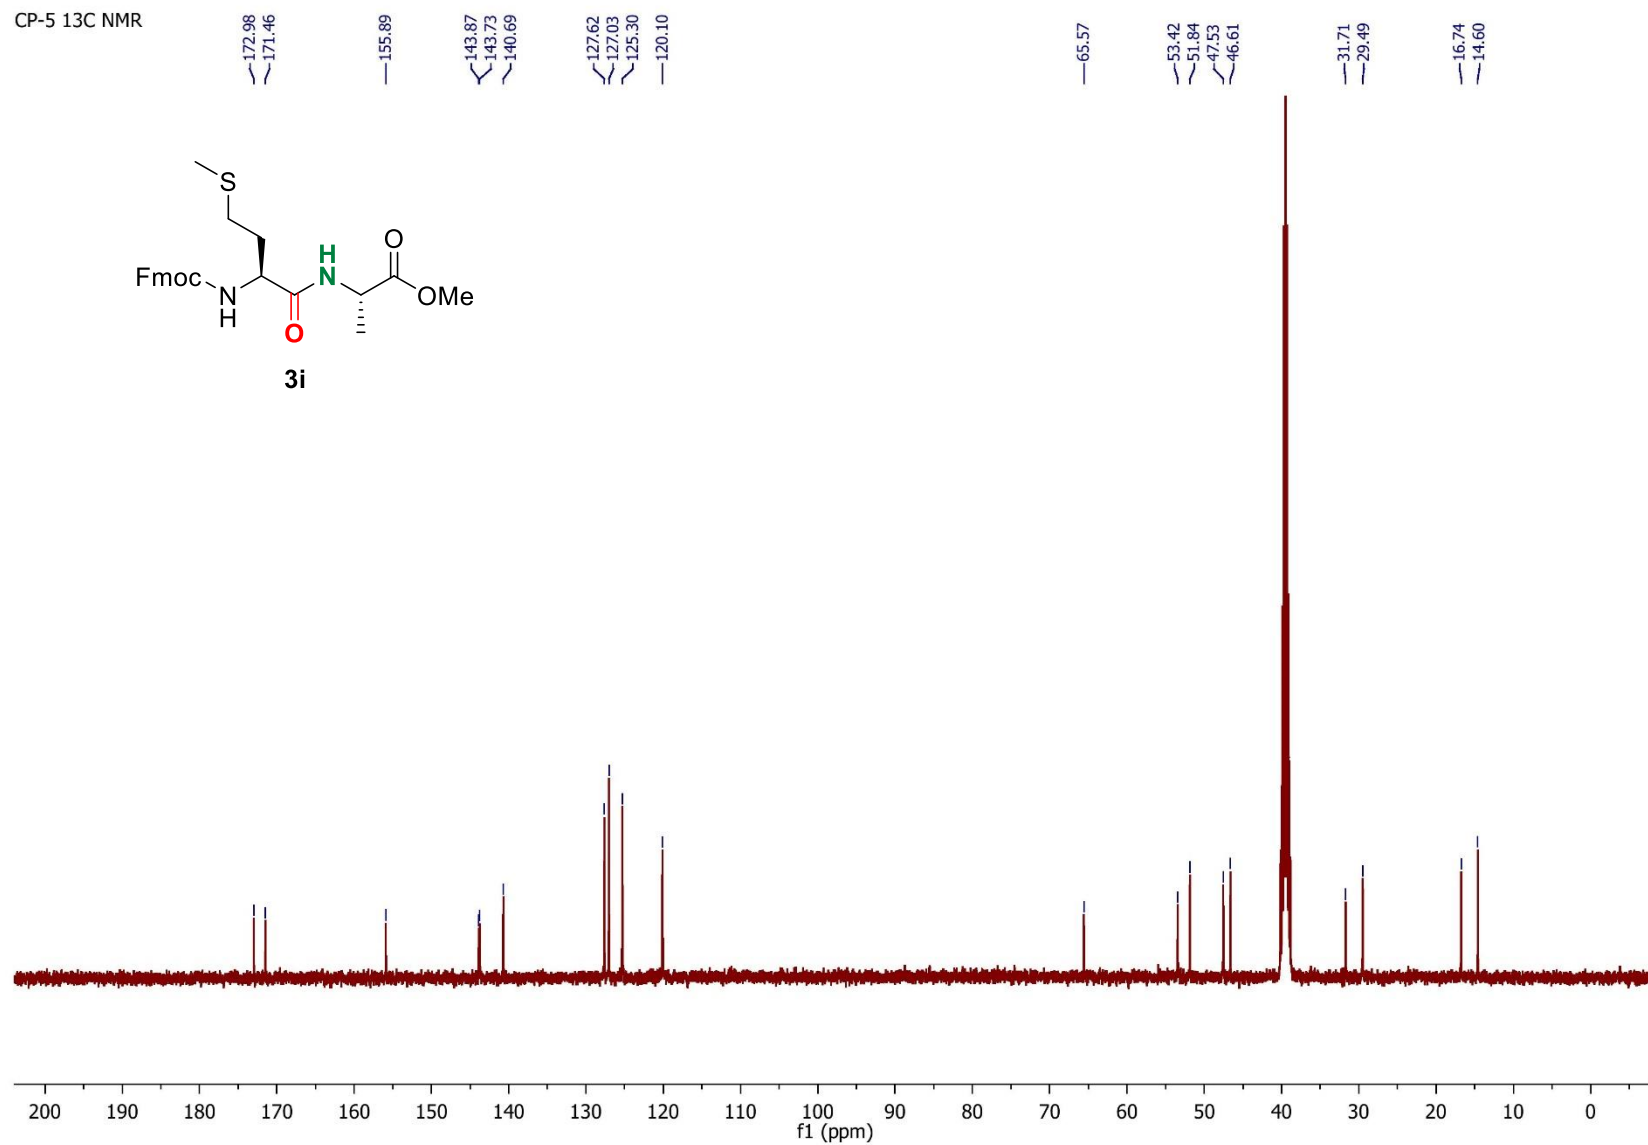

Figure S39. <sup>13</sup>C NMR Spectrum of **3i** (101MHz, DMSO-d<sub>6</sub>)

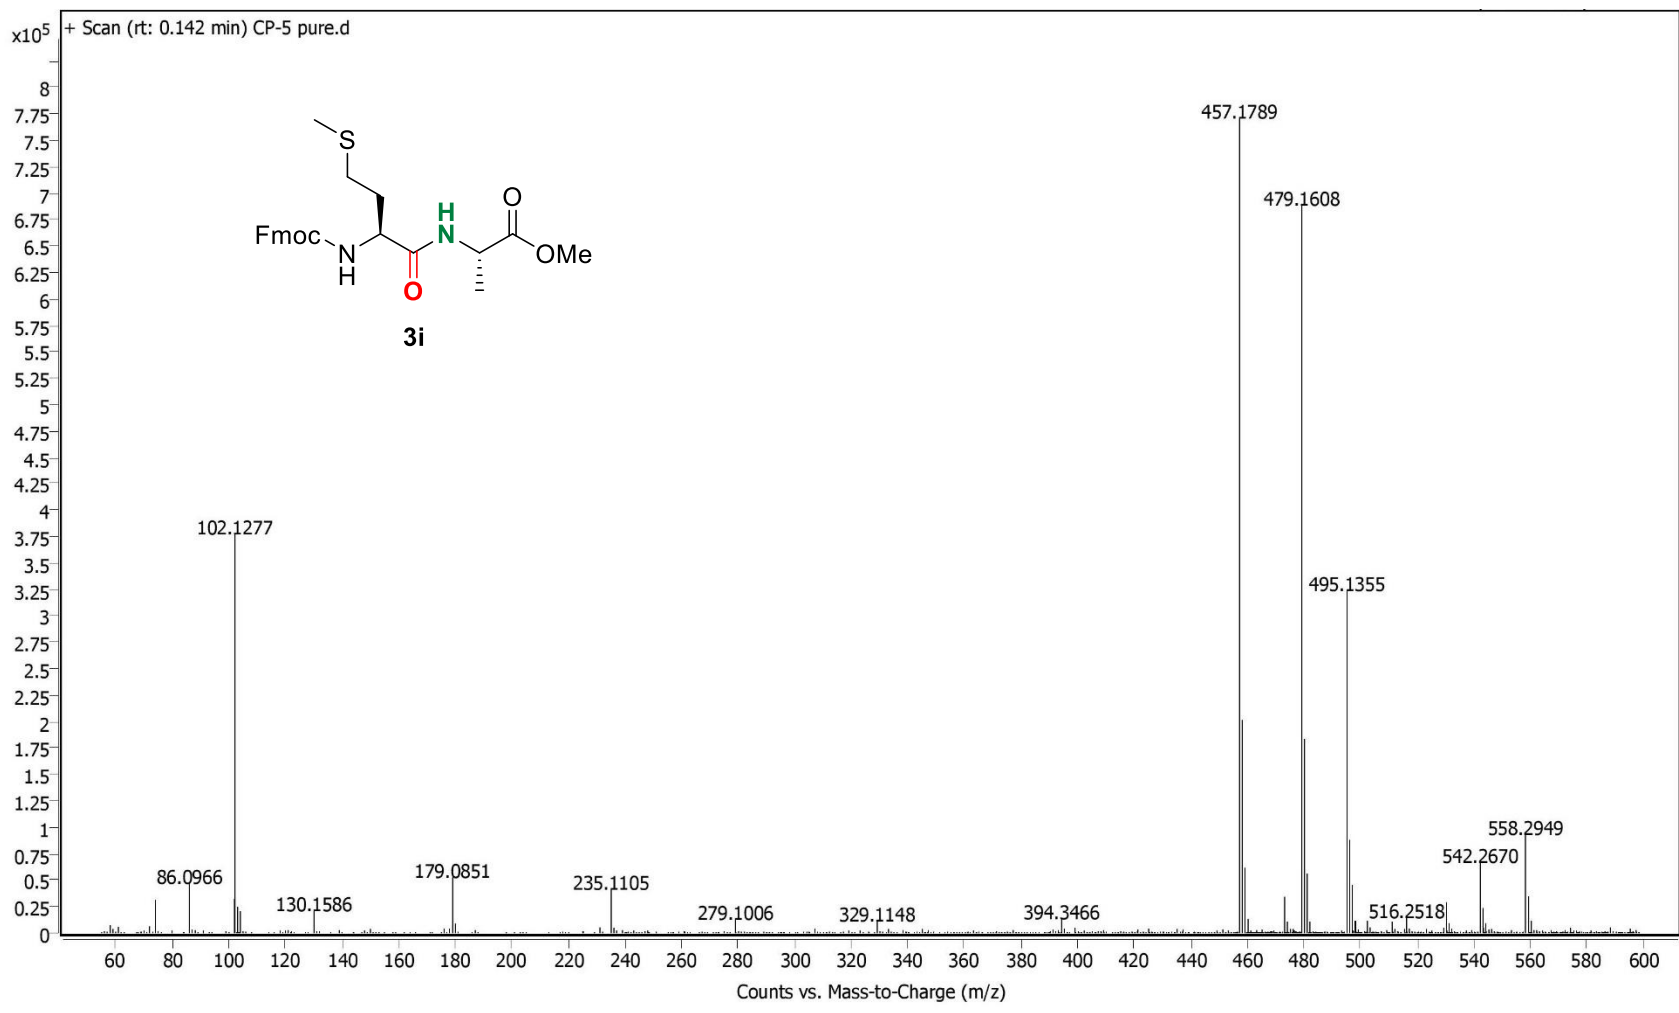

**Figure S40.** HRMS Spectrum of **3i**

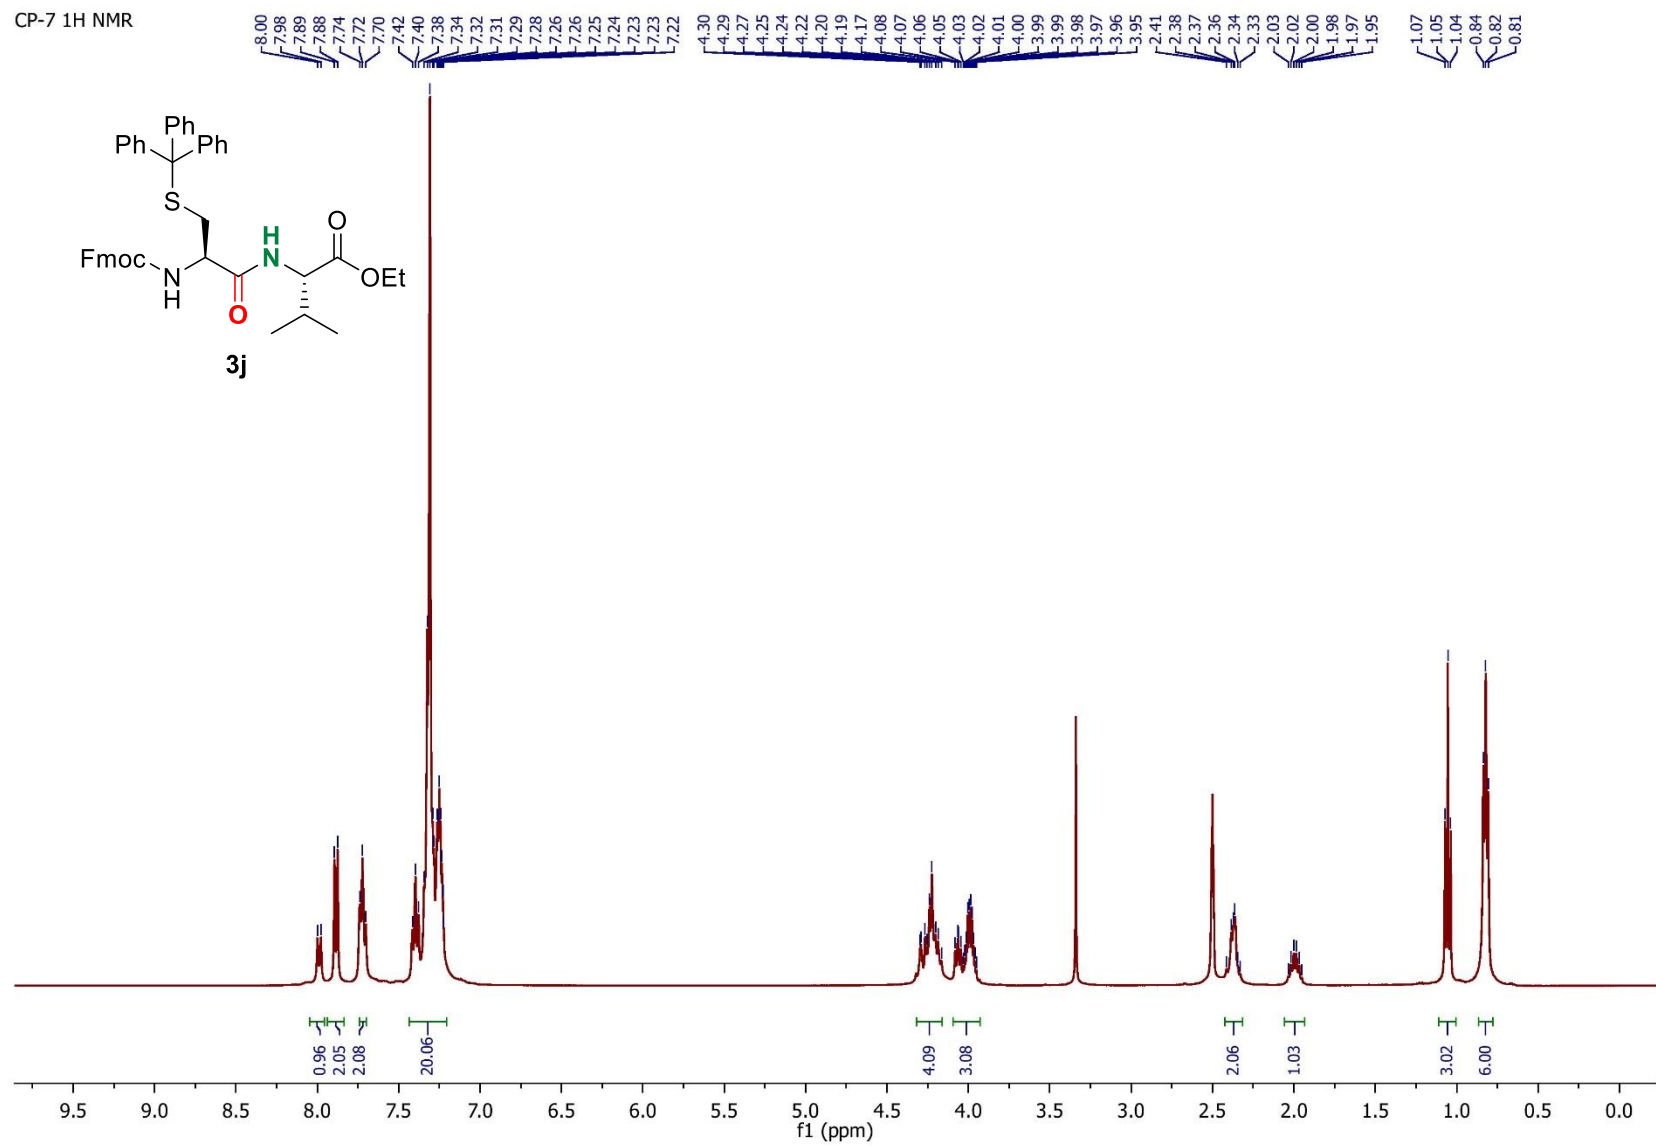

Figure S41. <sup>1</sup>H NMR Spectrum of **3j** (400MHz, DMSO-d<sub>6</sub>)



CP-7 13C NMR

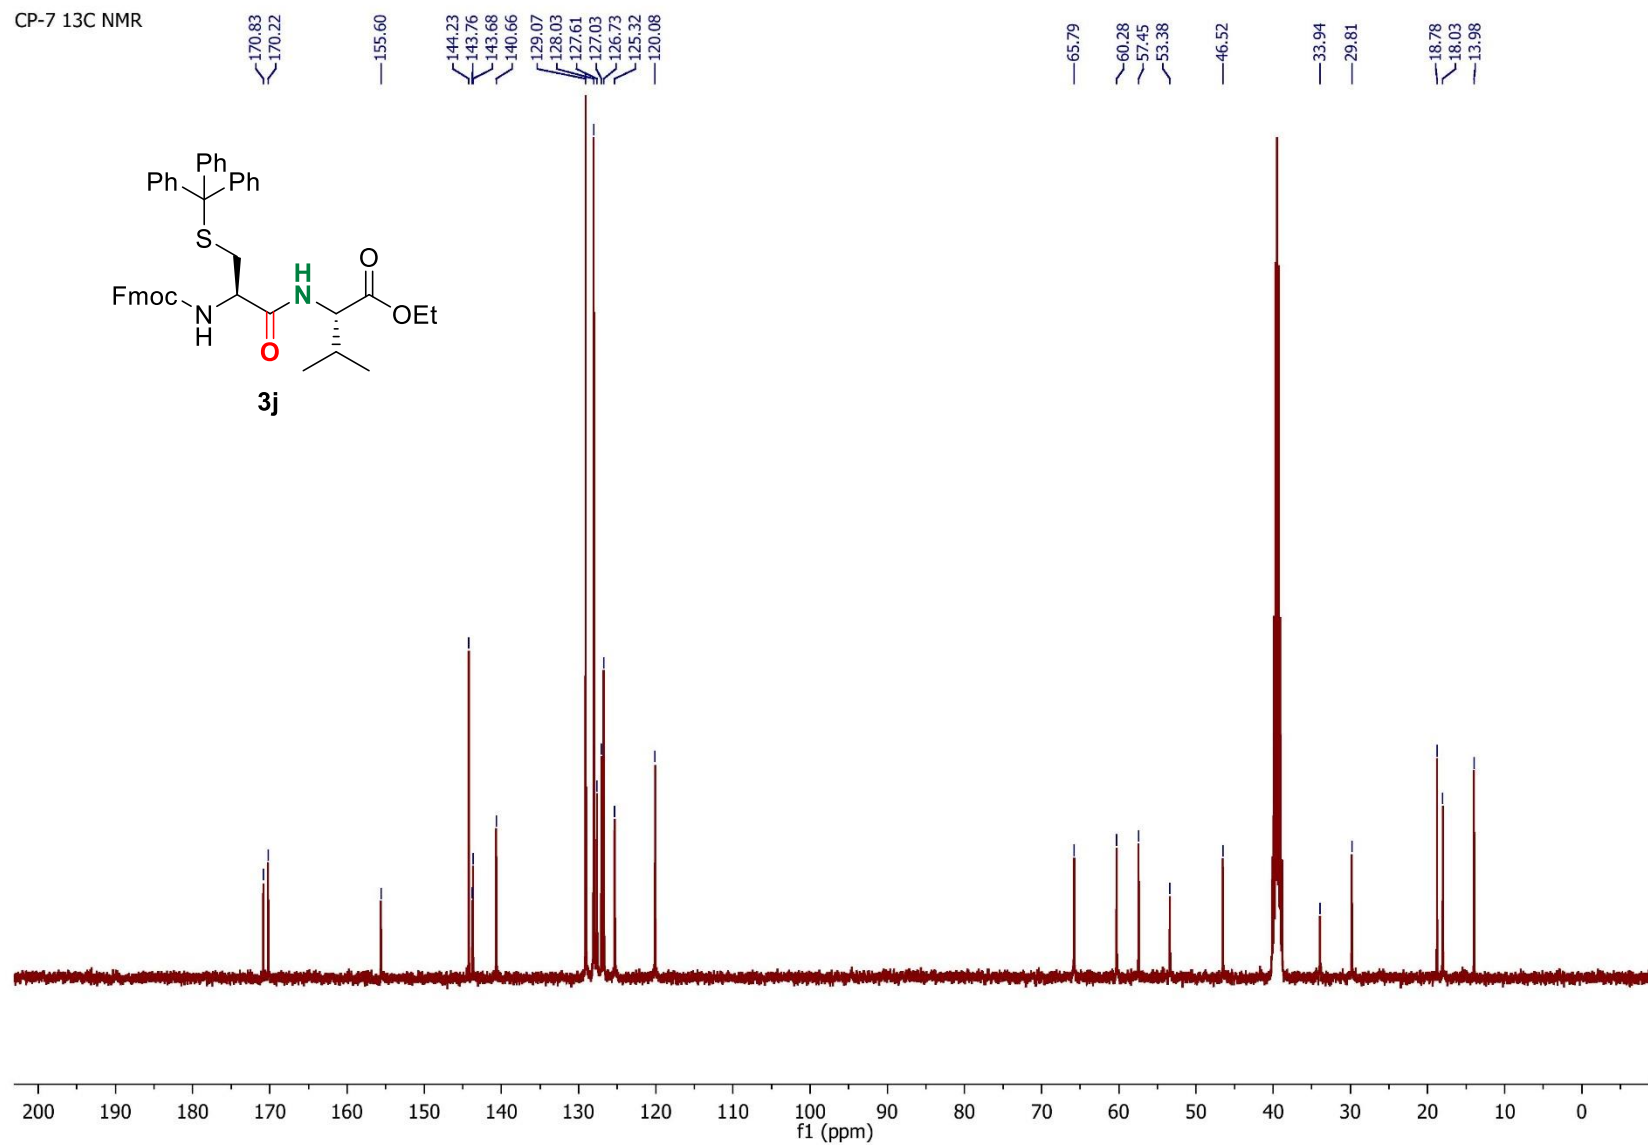

Figure S42.  $^{13}\text{C}$  NMR Spectrum of **3j** (101MHz, DMSO- $d_6$ )

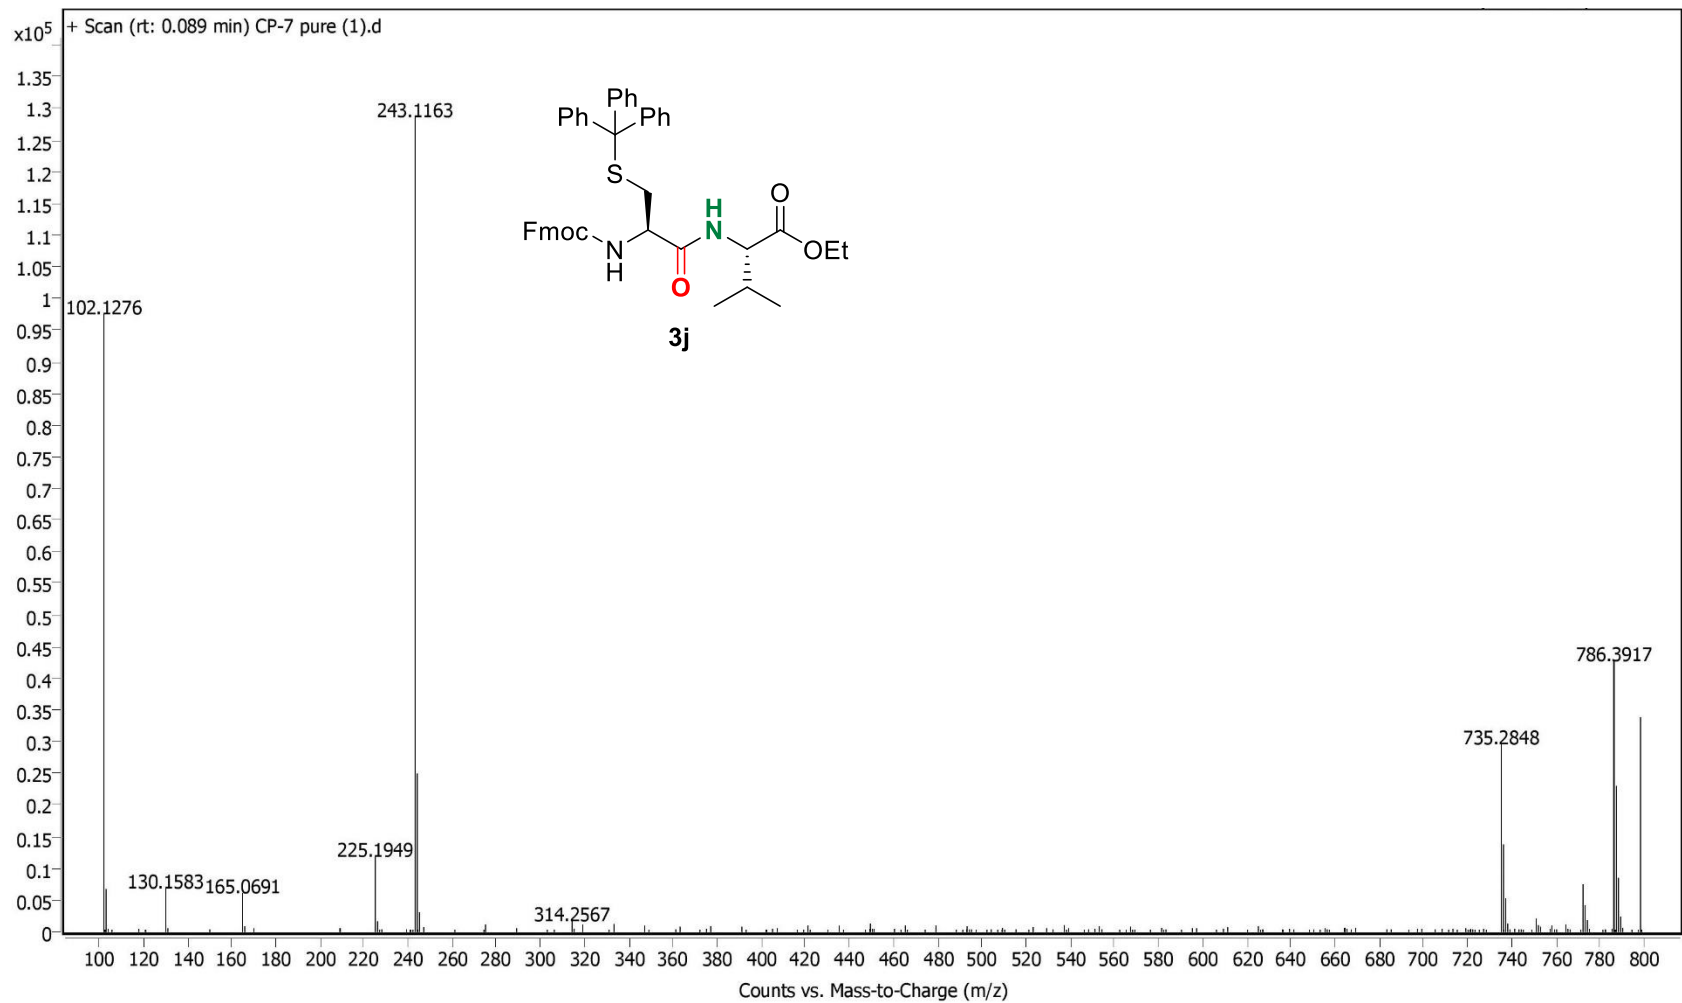

**Figure S43.** HRMS Spectrum of **3j**

DP-1 1H NMR

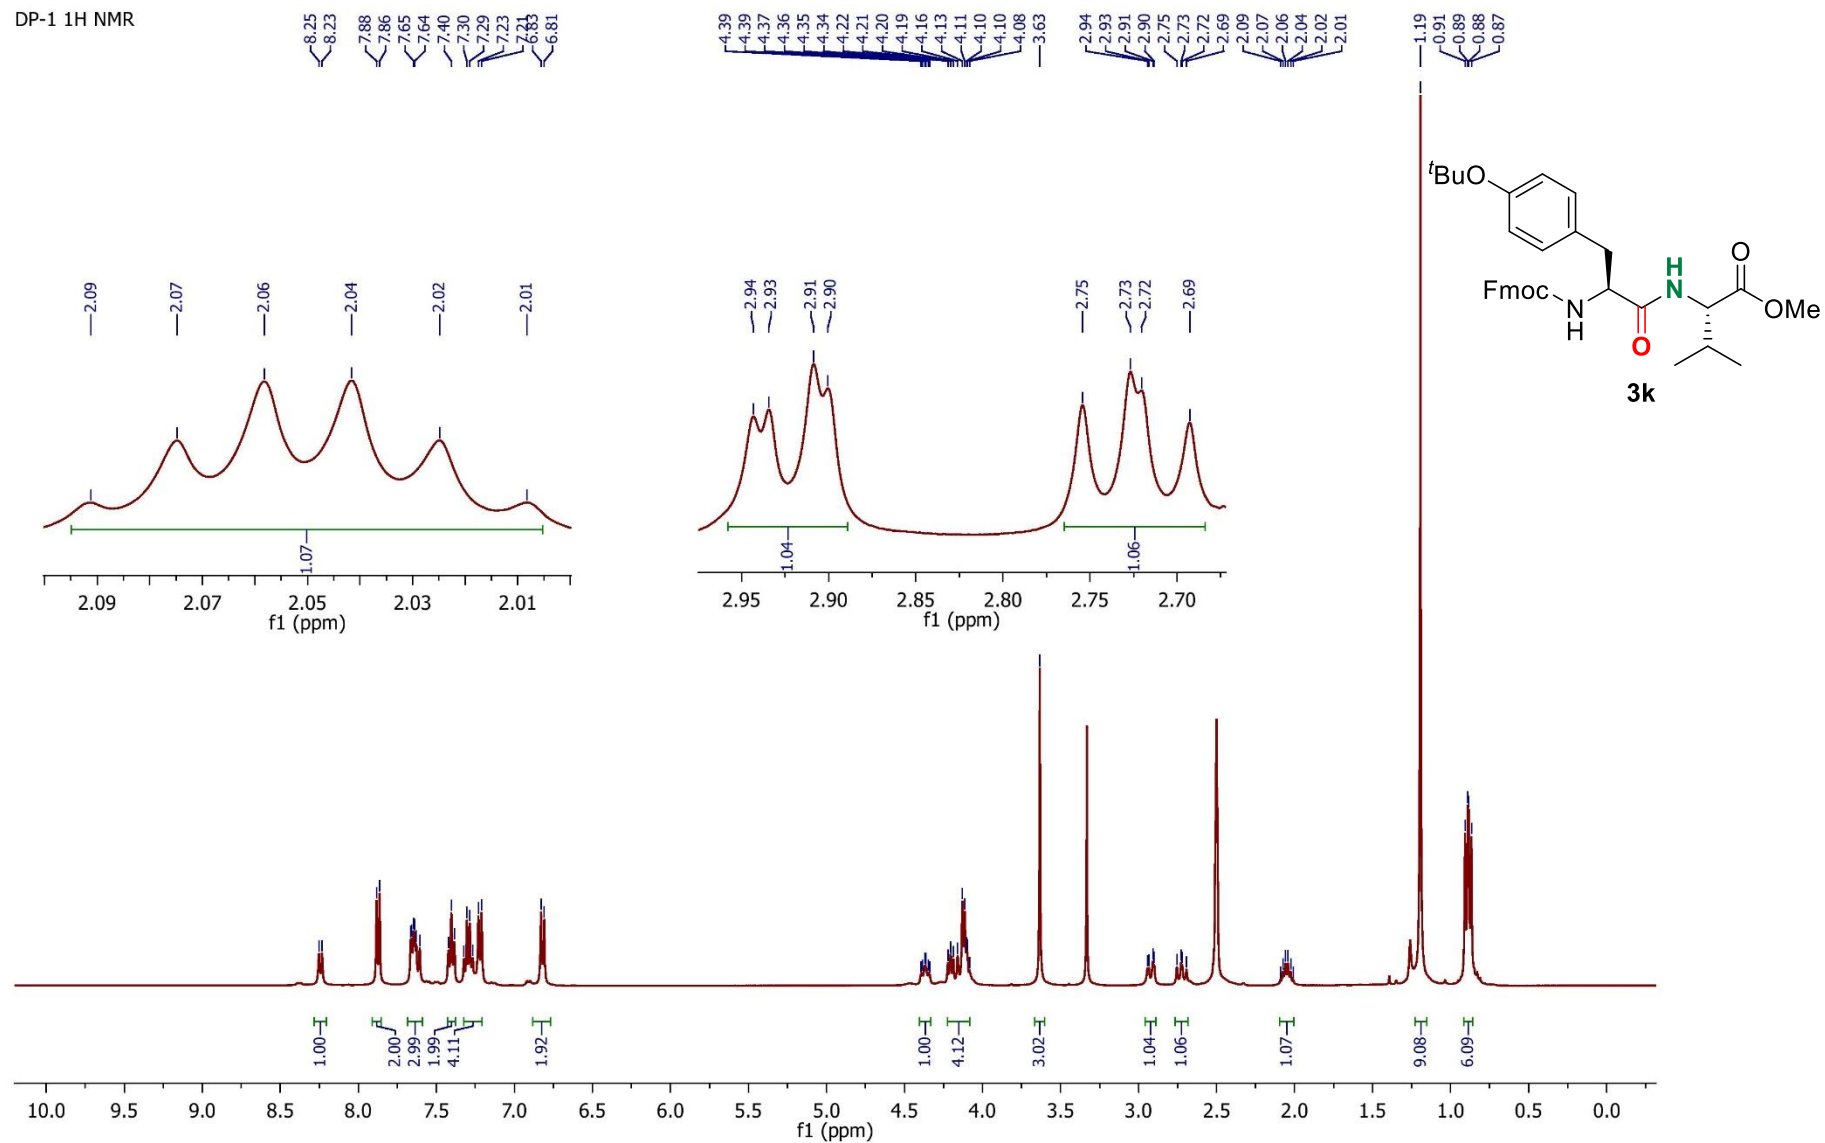

Figure S44. <sup>1</sup>H NMR Spectrum of 3k (400MHz, DMSO-d<sub>6</sub>)

DP-1 13C NMR

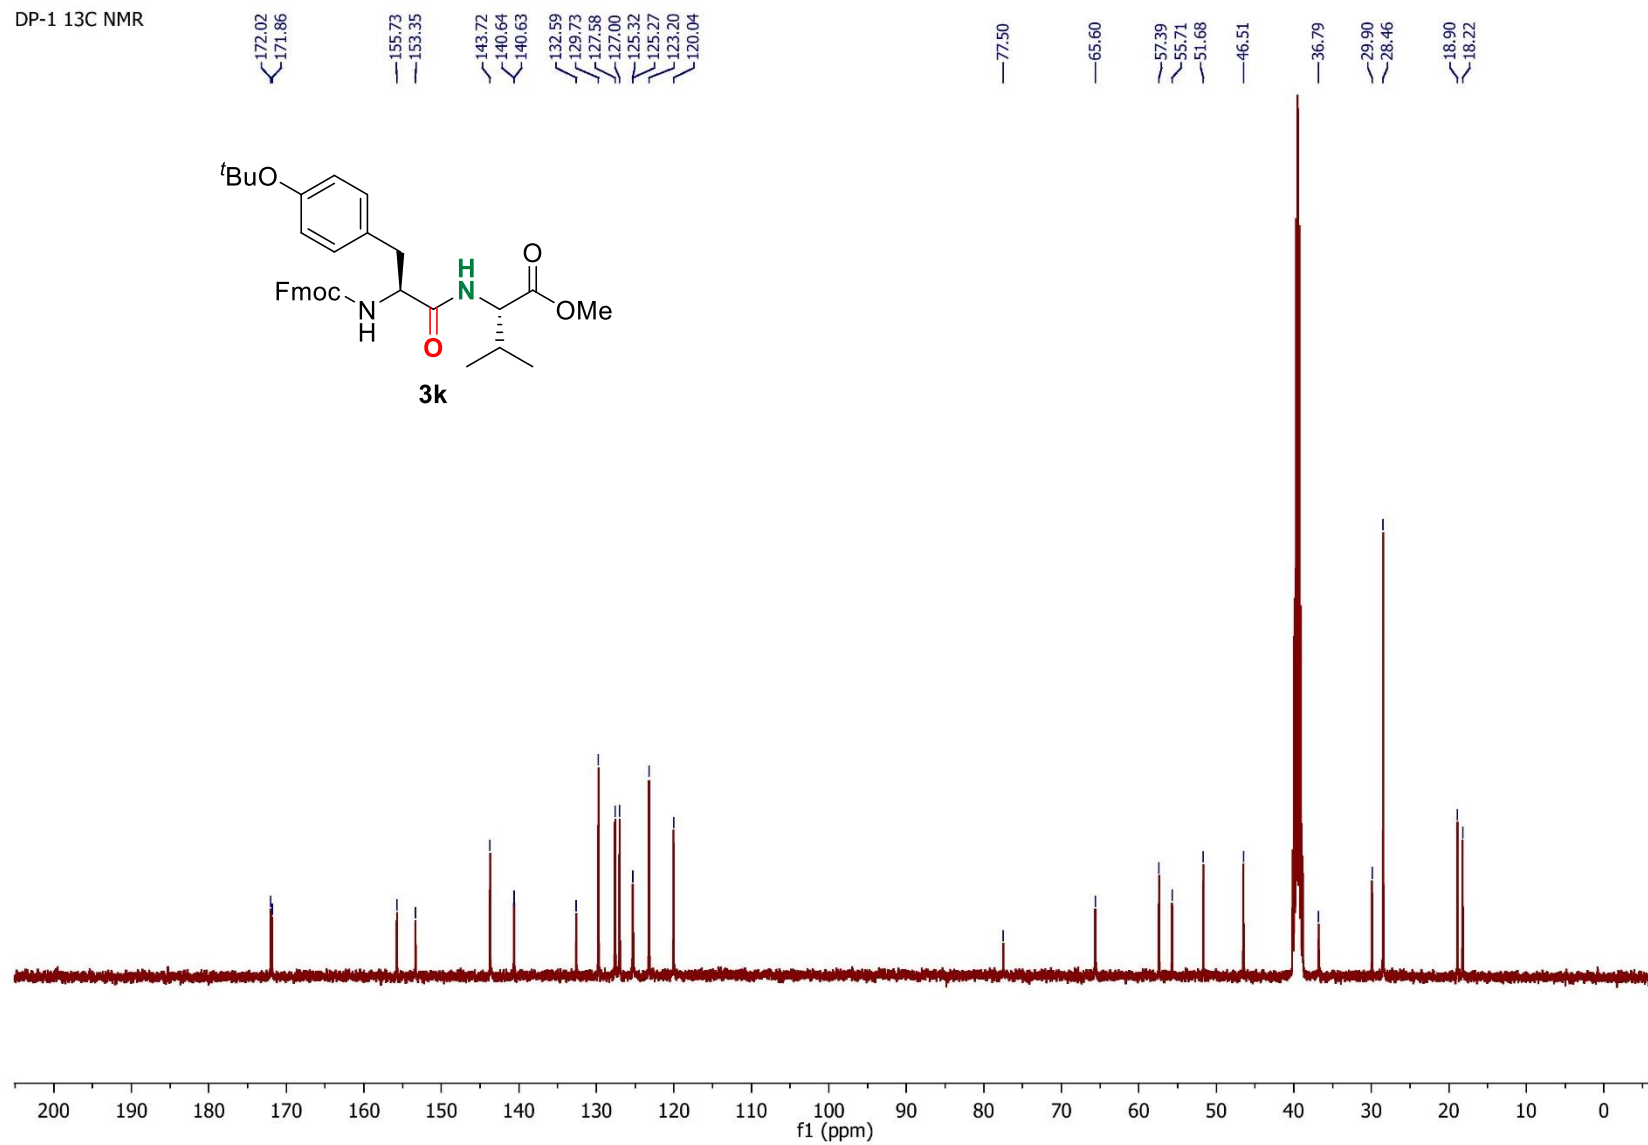

Figure S45.  $^{13}\text{C}$  NMR Spectrum of 3k (101MHz,  $\text{DMSO-d}_6$ )

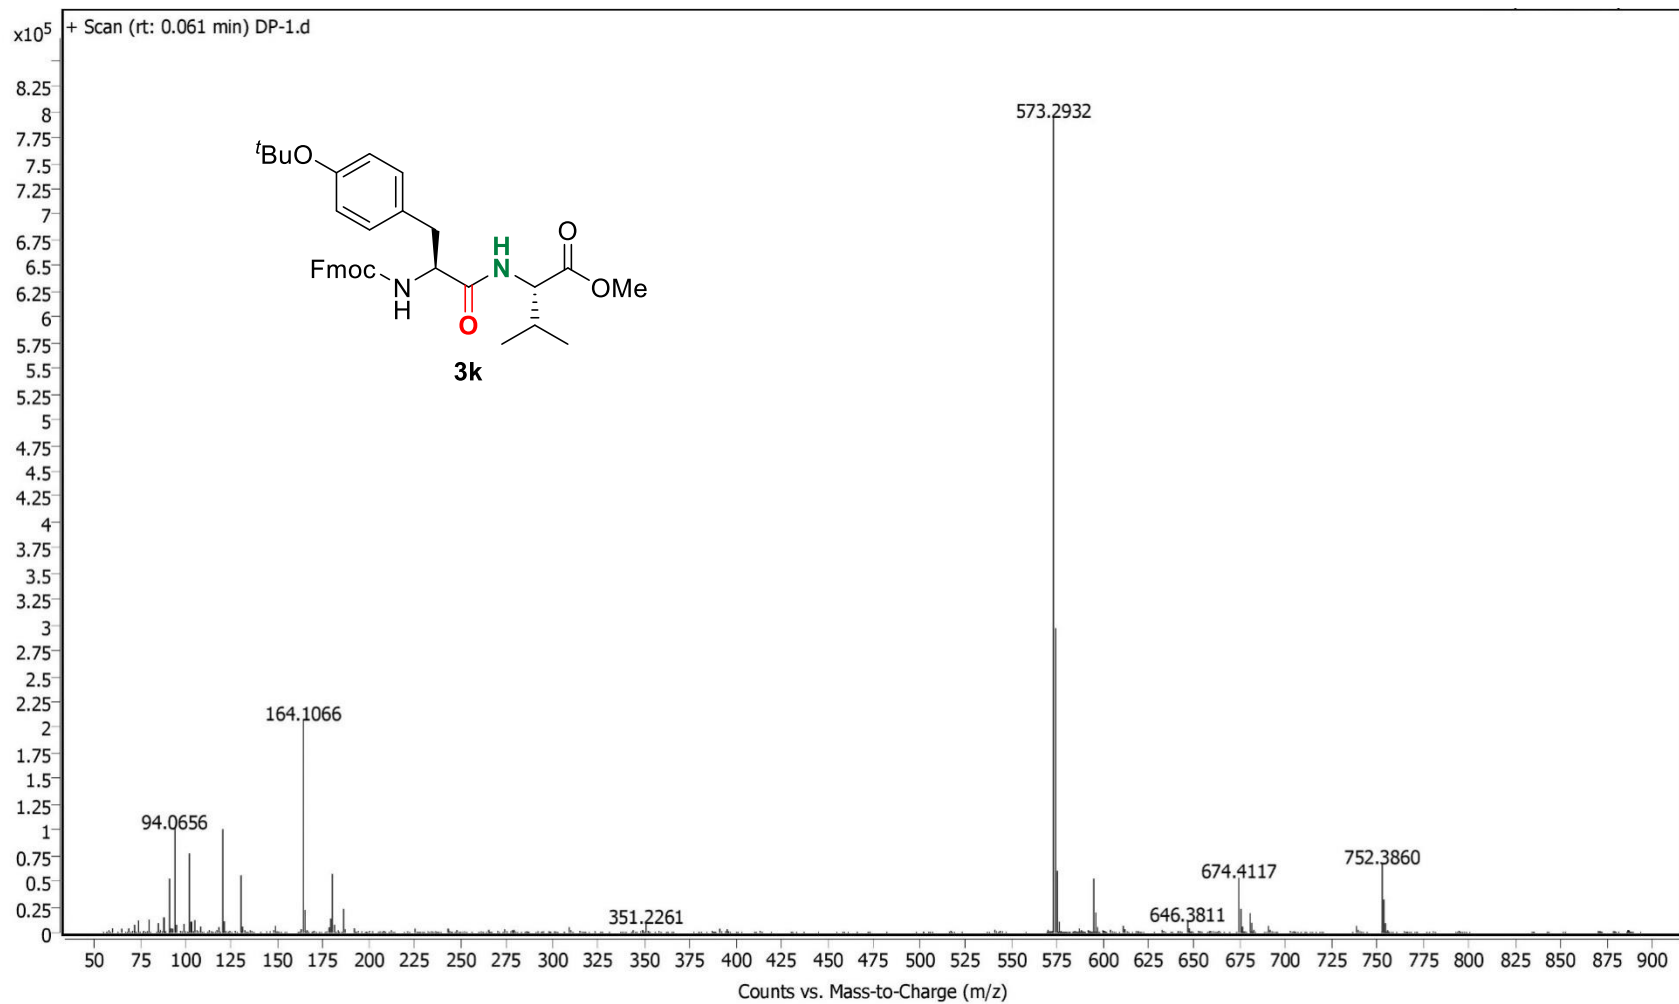

**Figure S46.** HRMS Spectrum of **3k**

CP-4 <sup>1</sup>H NMR

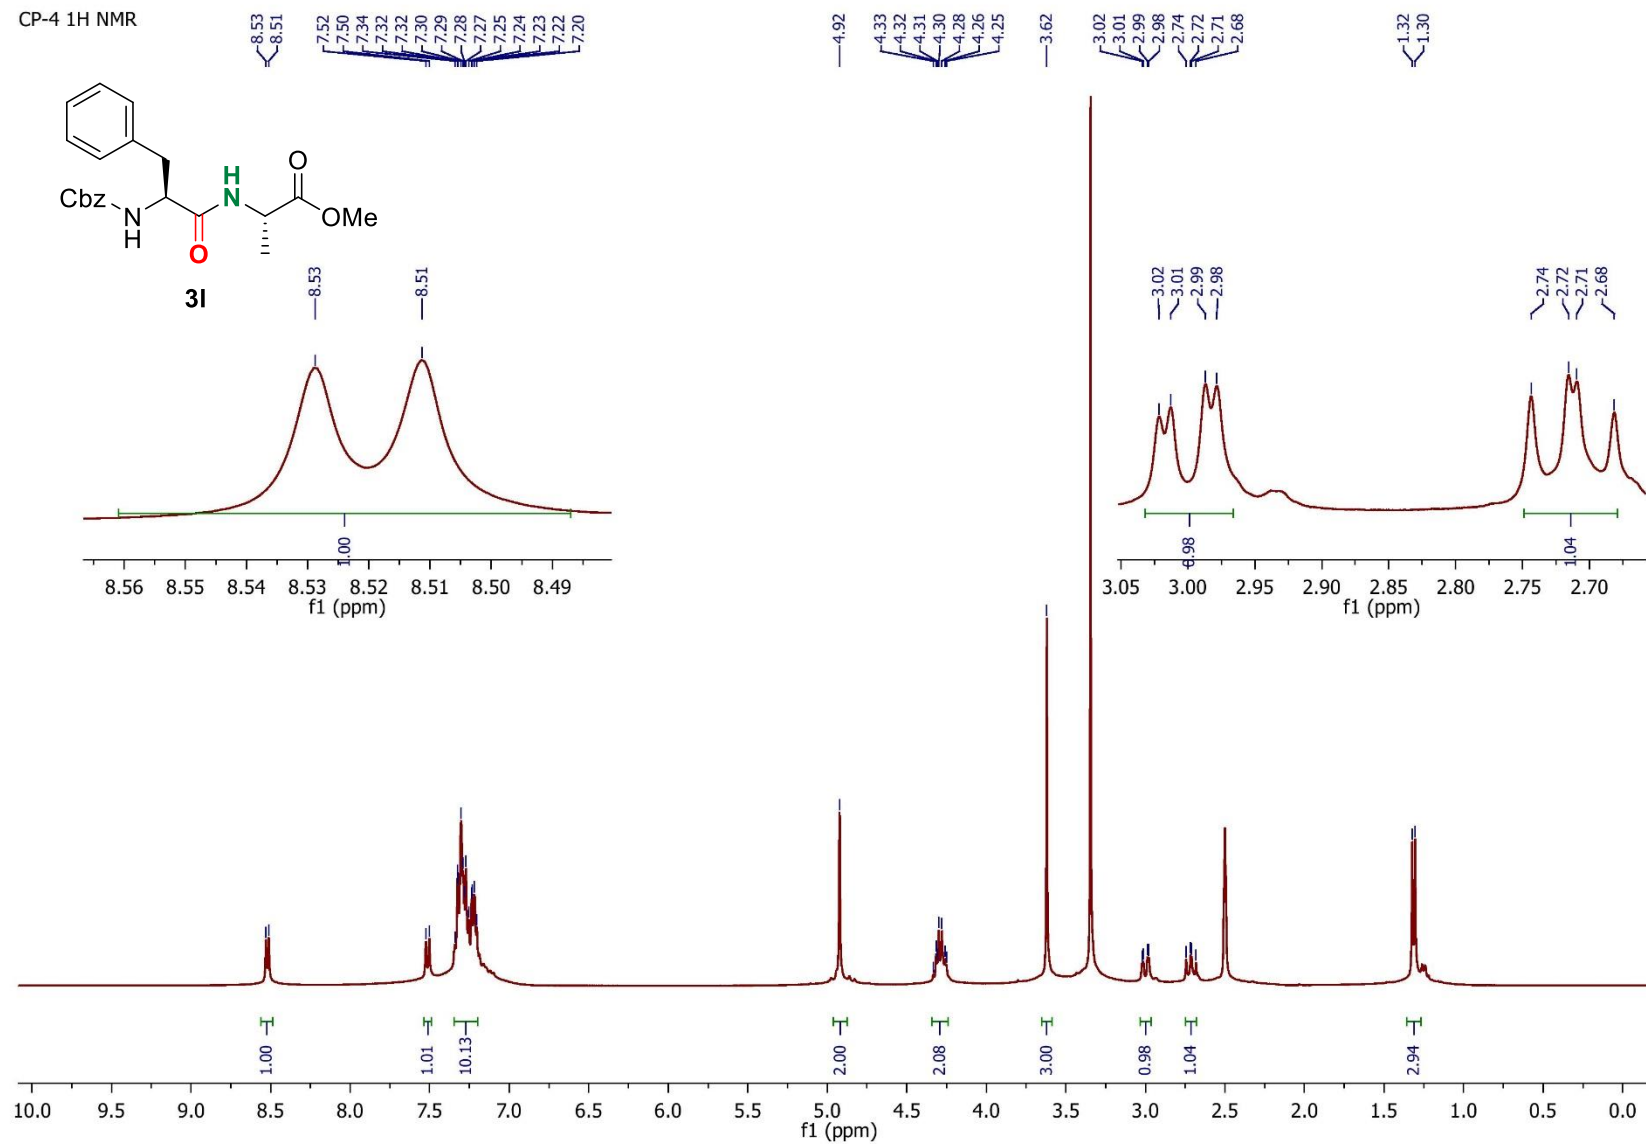

**Figure S47.** <sup>1</sup>H NMR Spectrum of **3l** (400MHz, DMSO-d<sub>6</sub>)

CP-4 <sup>13</sup>C NMR

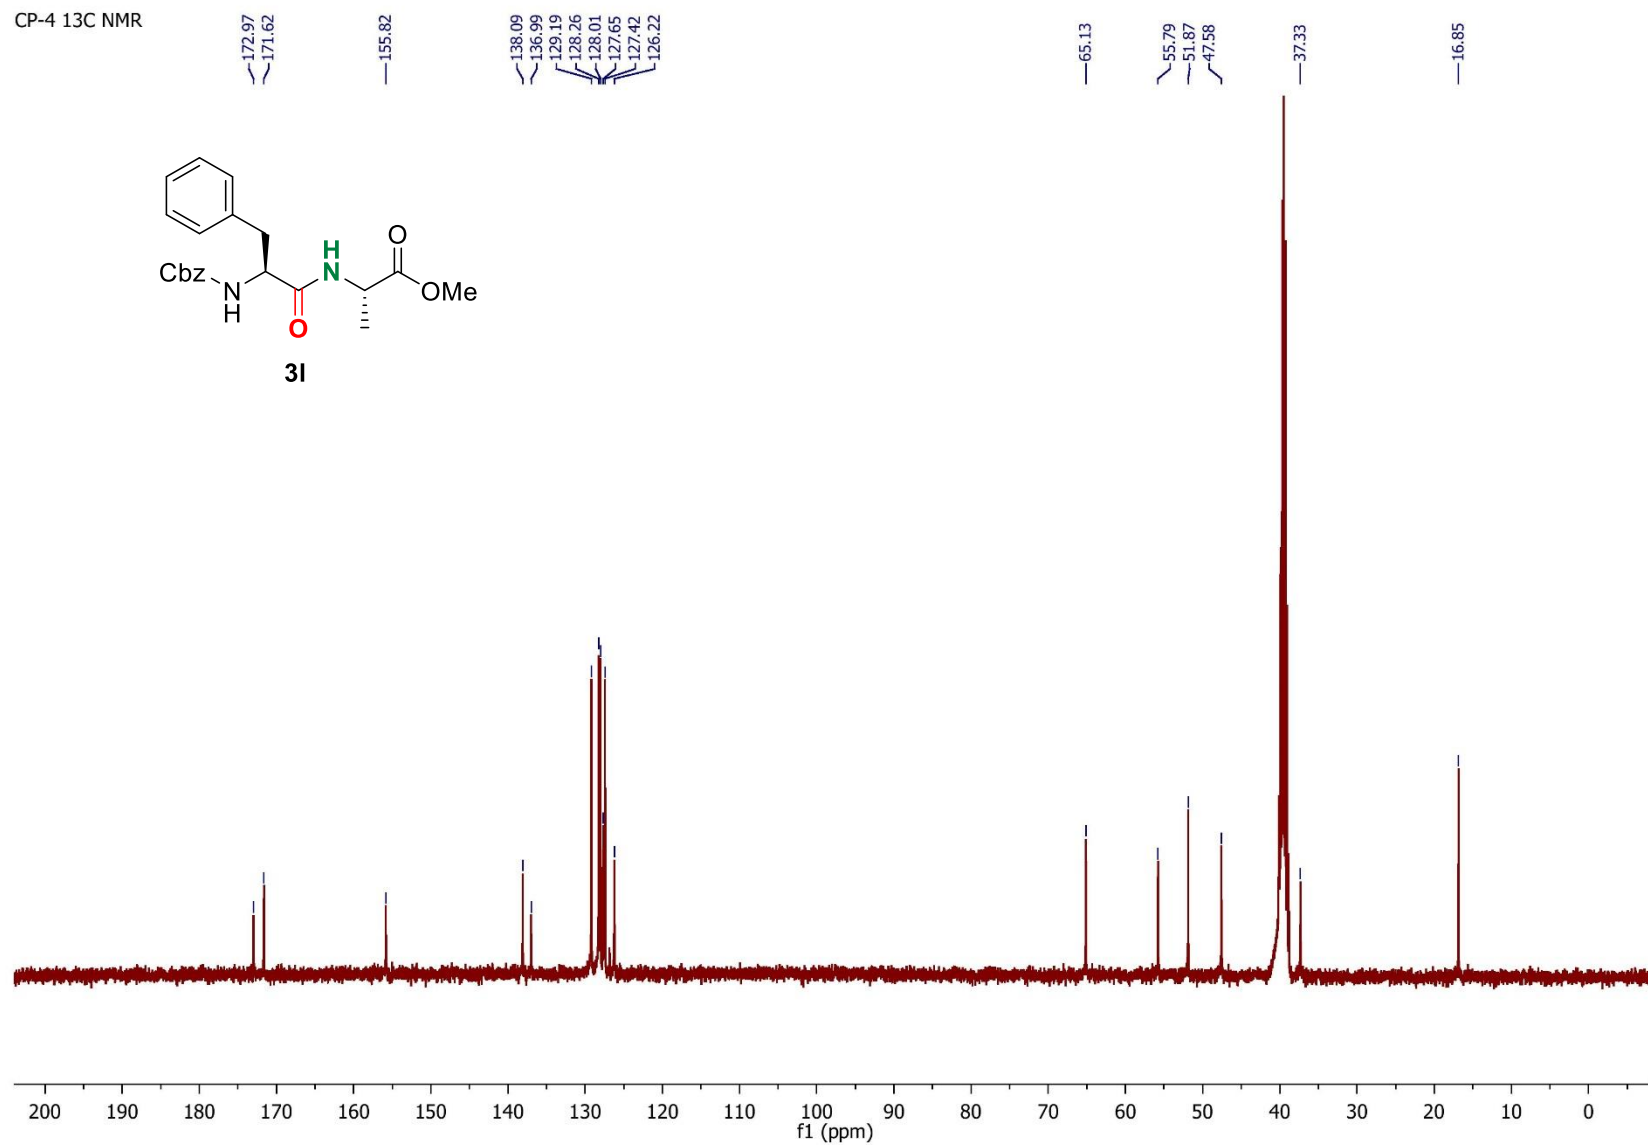

Figure S48. <sup>13</sup>C NMR Spectrum of 3I (101MHz, DMSO-d<sub>6</sub>)

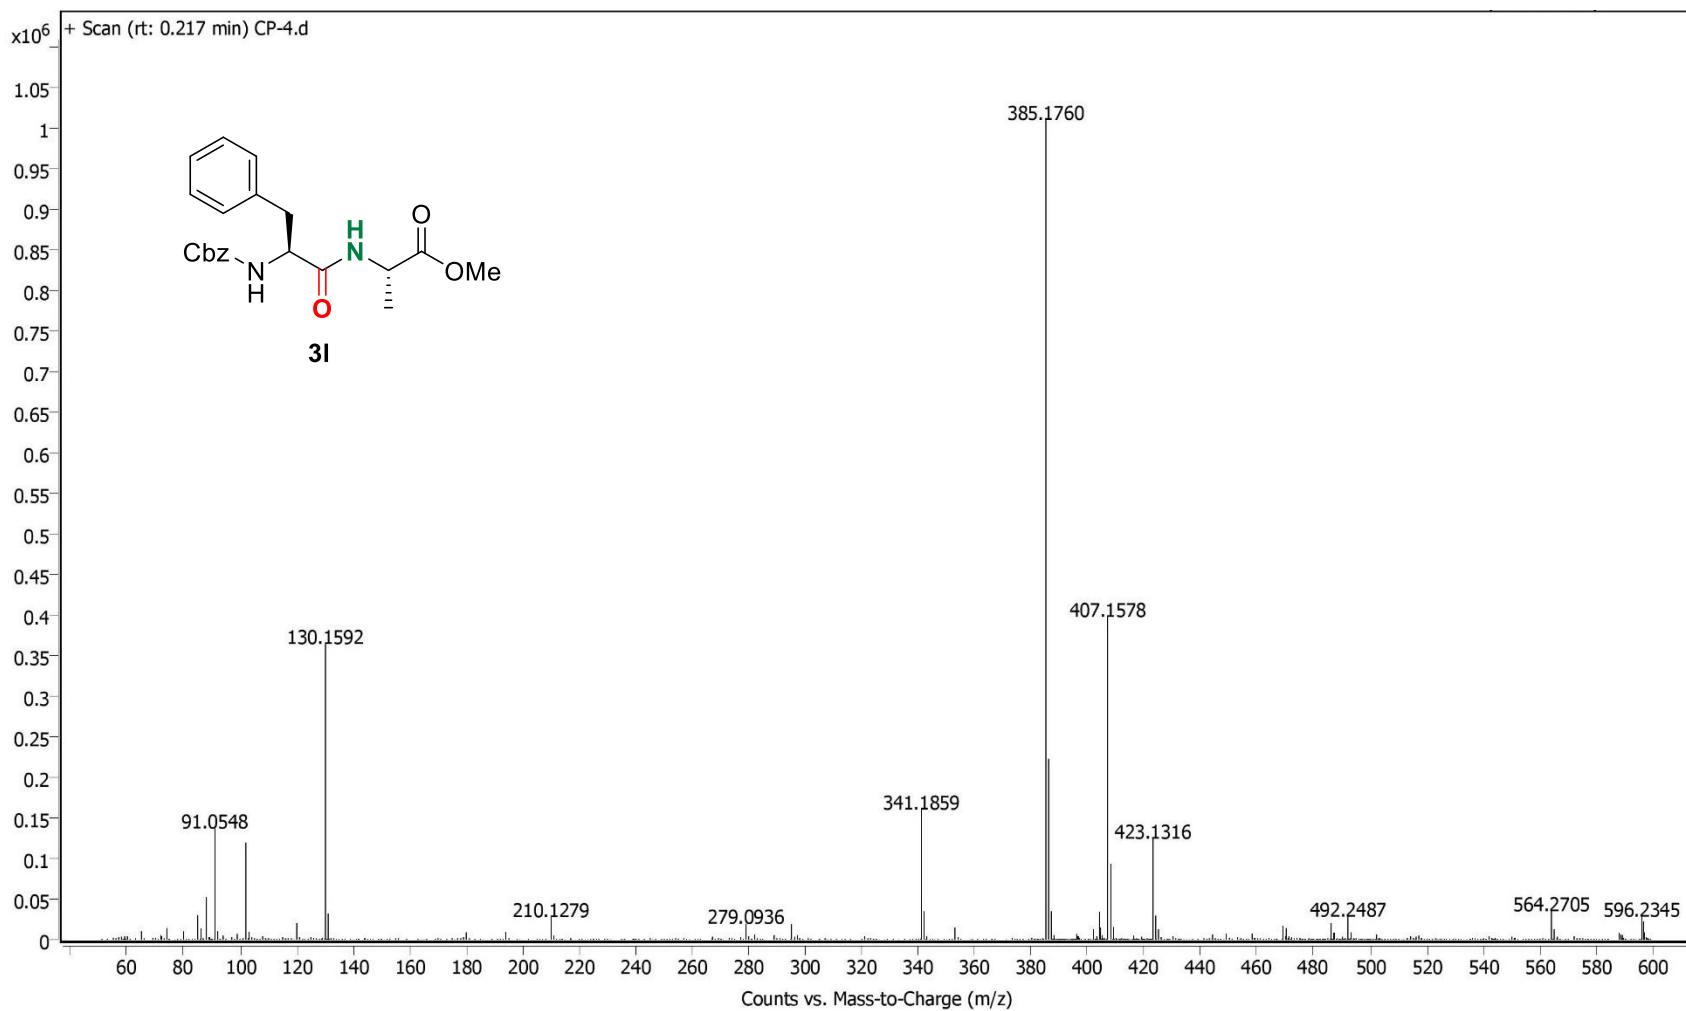

**Figure S49.** HRMS Spectrum of **31**



CP-4 1H NMR

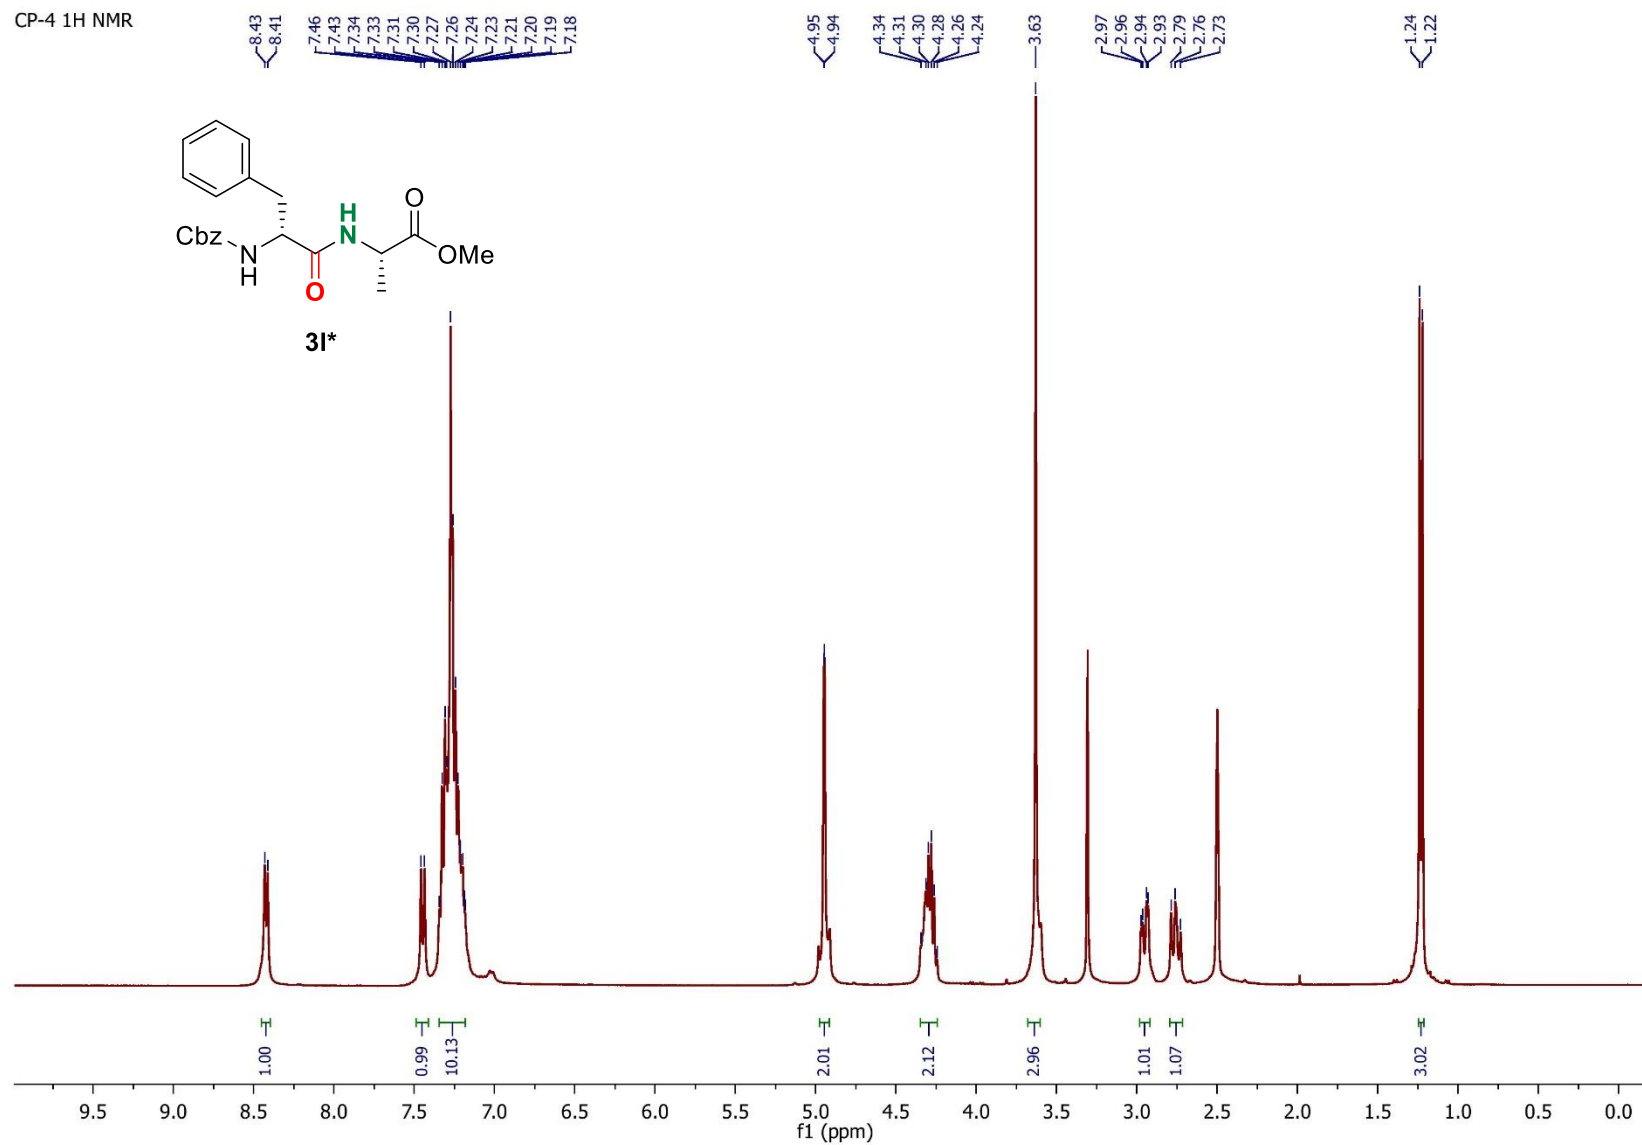

Figure S50.  $^1\text{H}$  NMR Spectrum of **31\*** (400MHz,  $\text{DMSO-d}_6$ )

CP-4 13C NMR

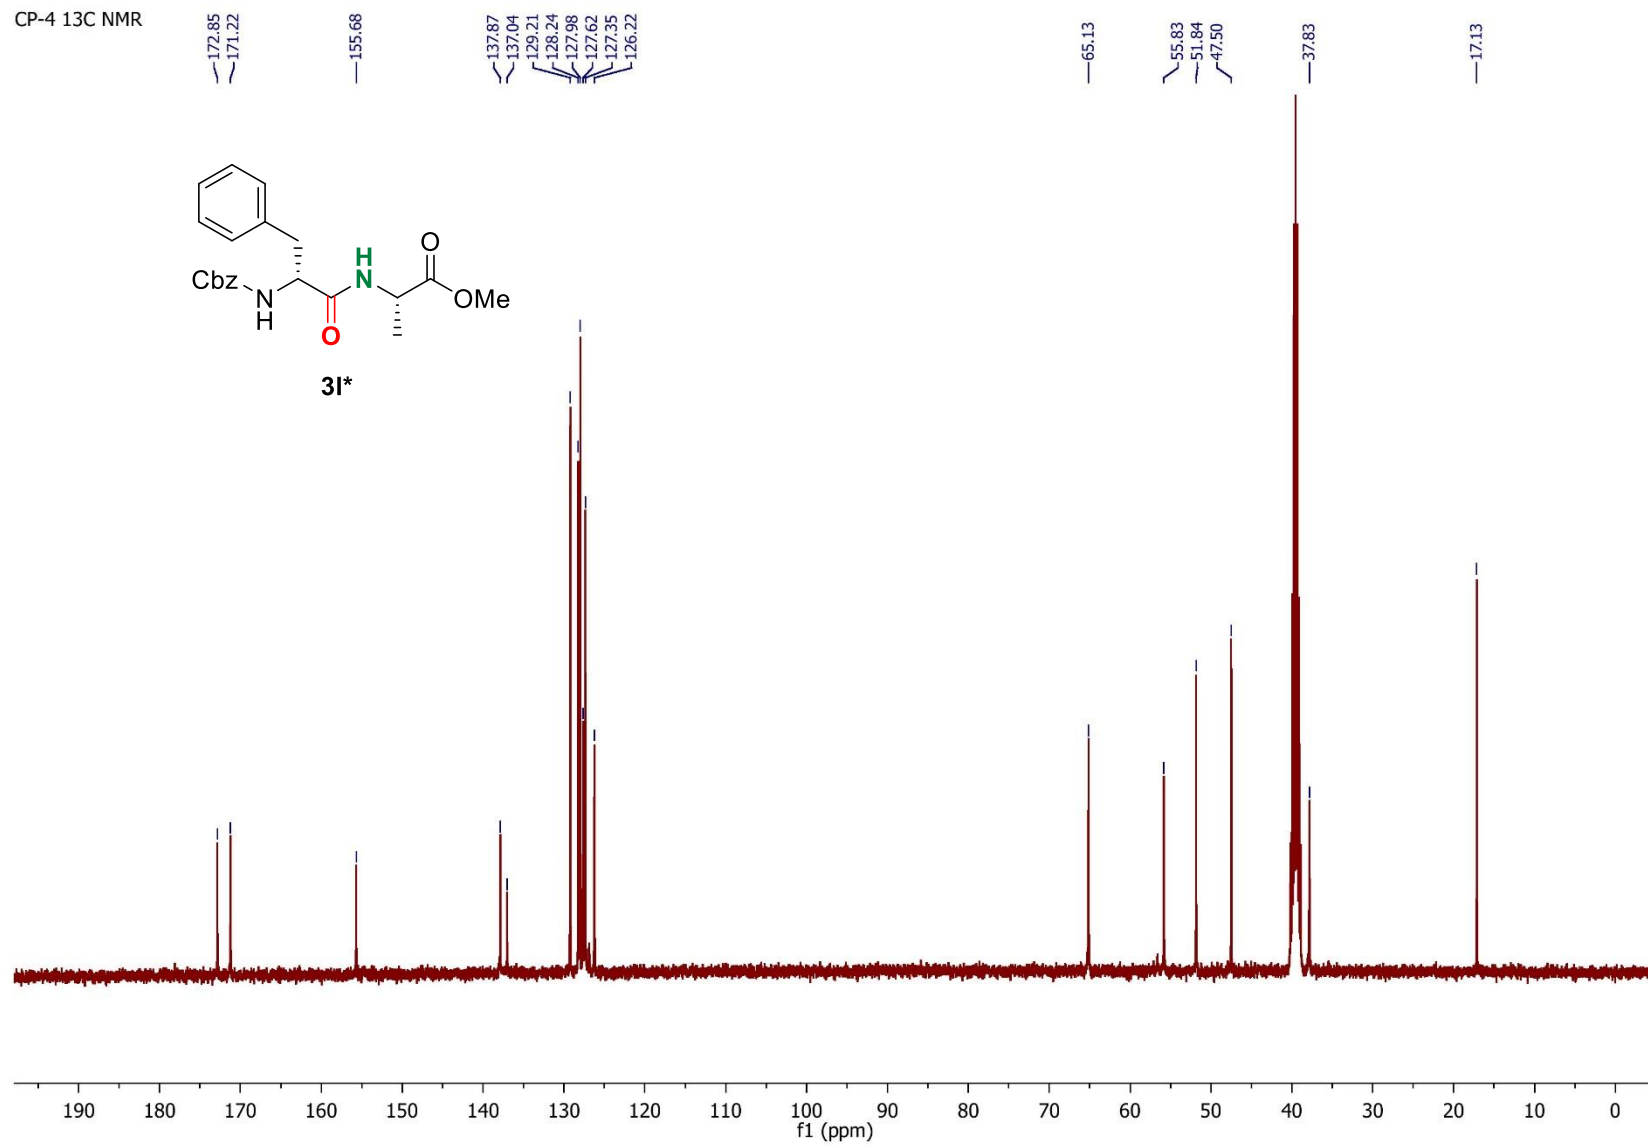

Figure S51. <sup>13</sup>C NMR Spectrum of **31\*** (101MHz, DMSO-d<sub>6</sub>)

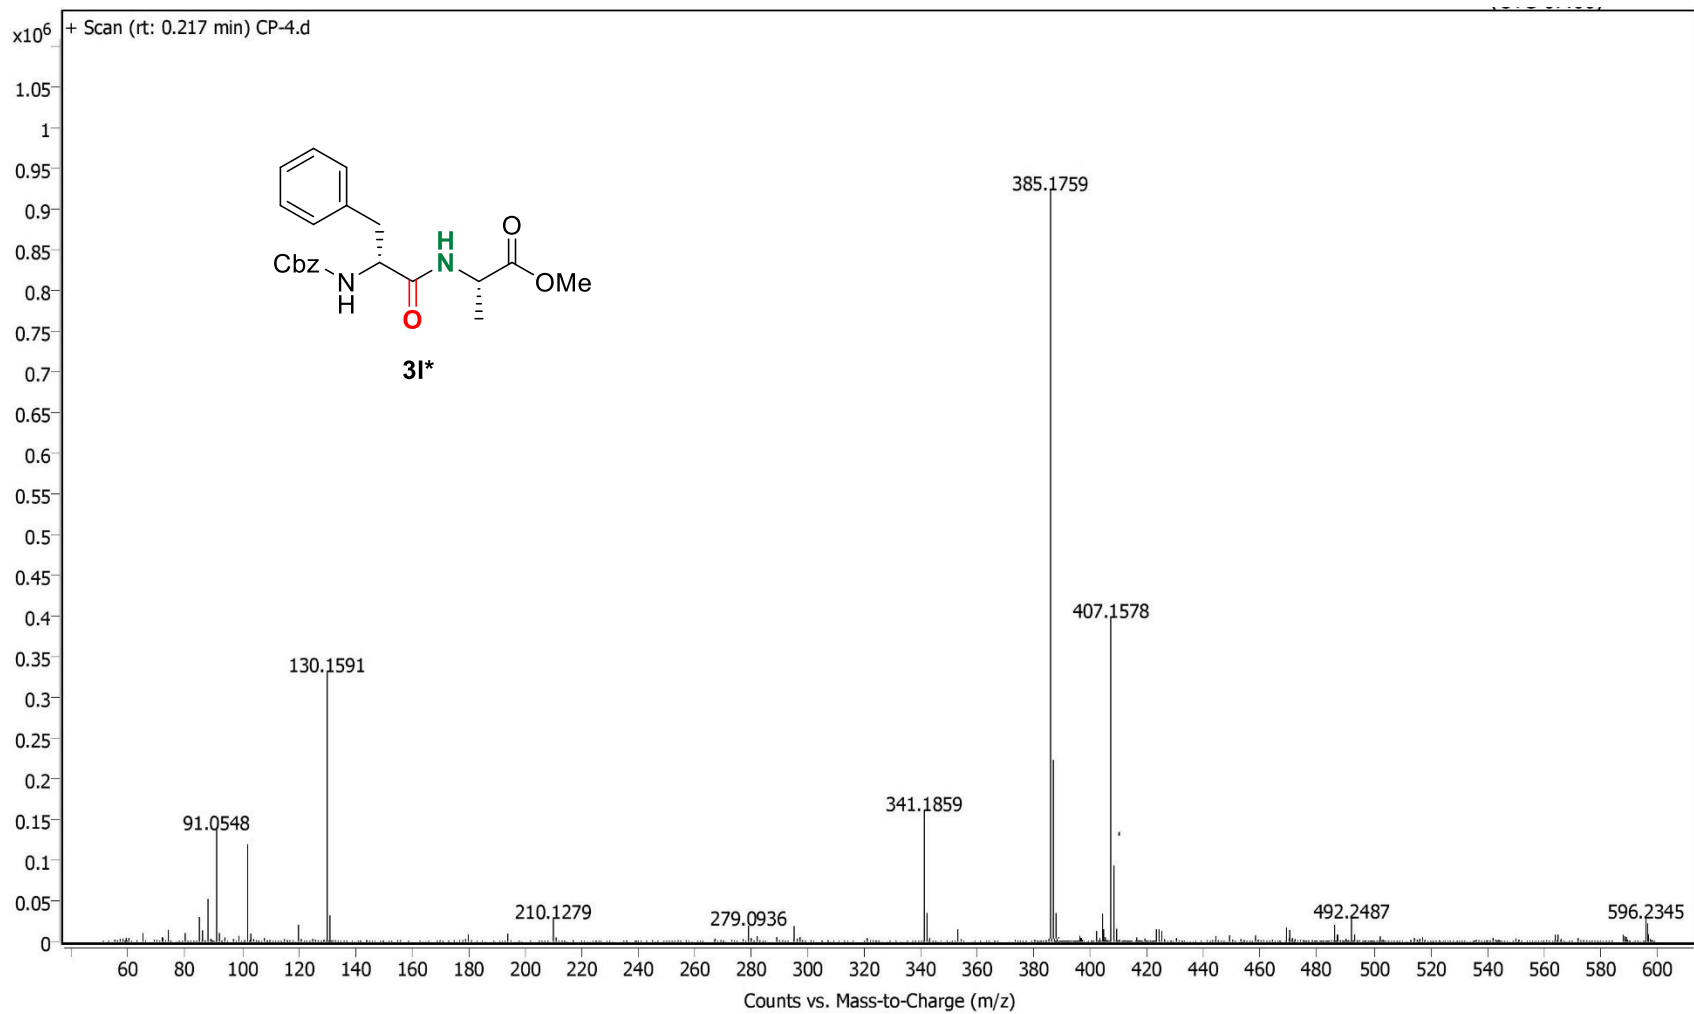

**Figure S52.** HRMS Spectrum of **3I\***

CP-18 1H NMR

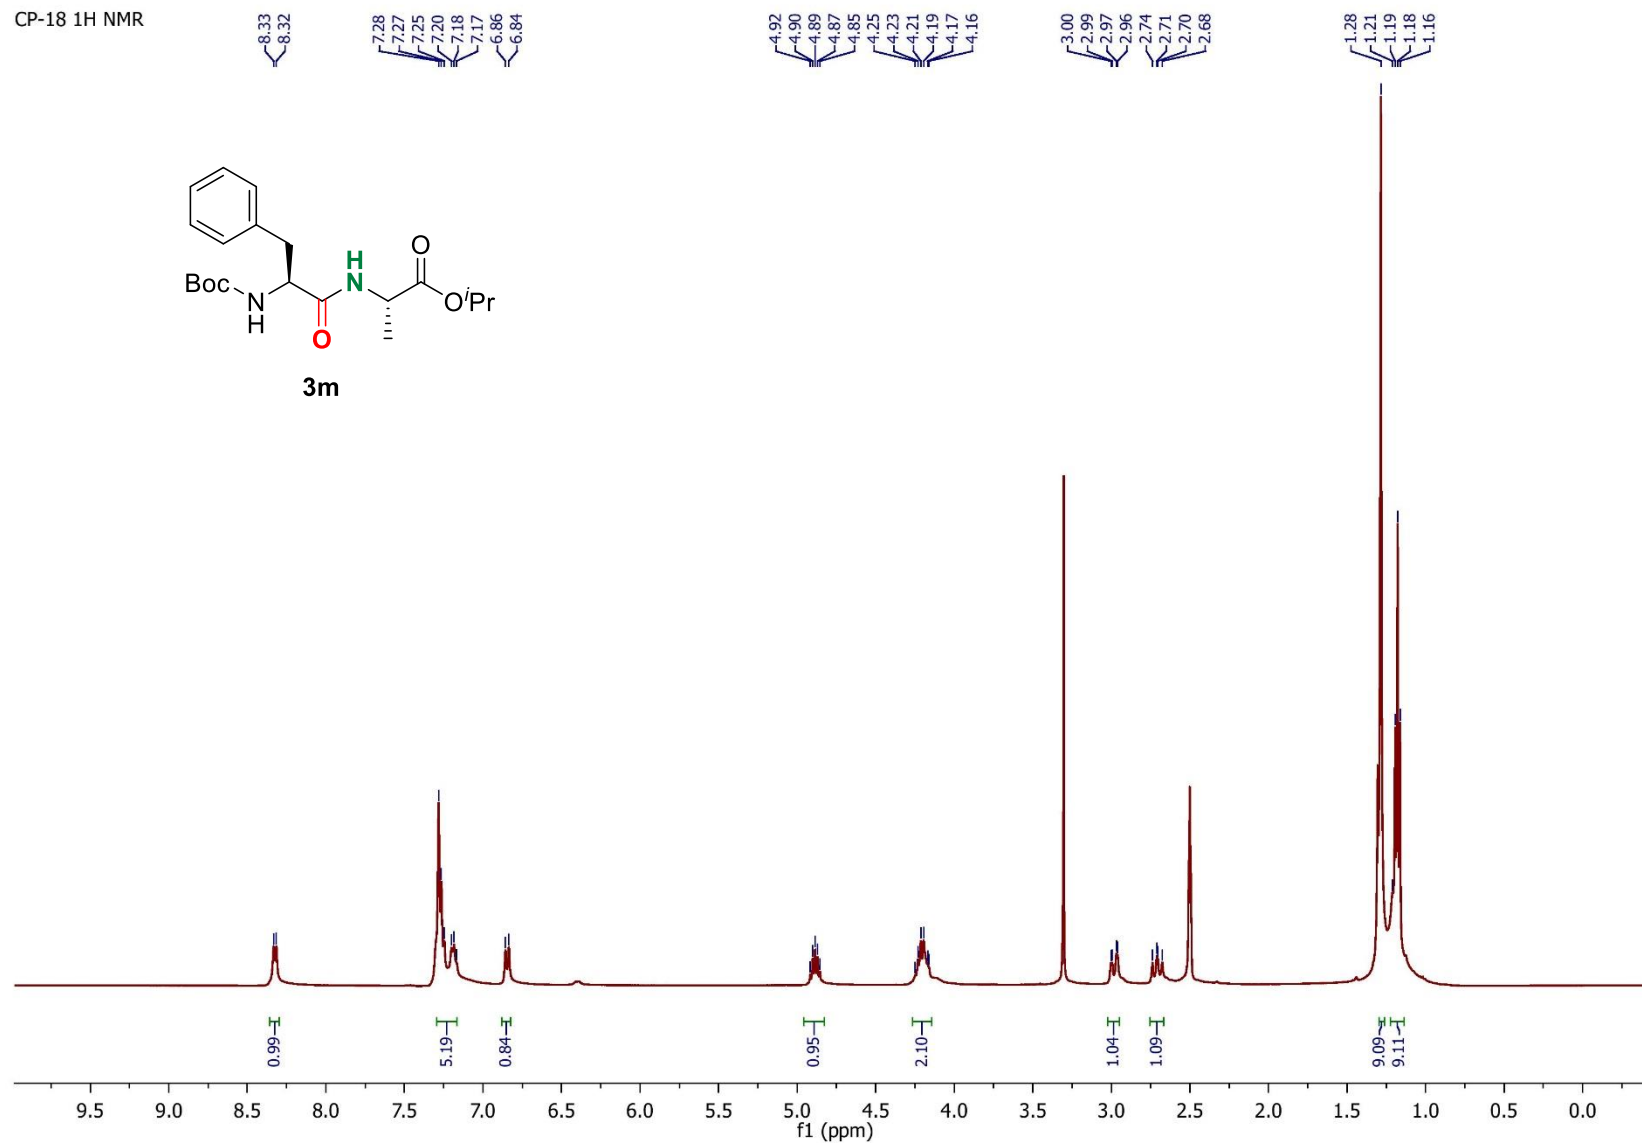

Figure S53. <sup>1</sup>H NMR Spectrum of **3m** (400MHz, DMSO-d<sub>6</sub>)

CP-18 <sup>13</sup>C NMR

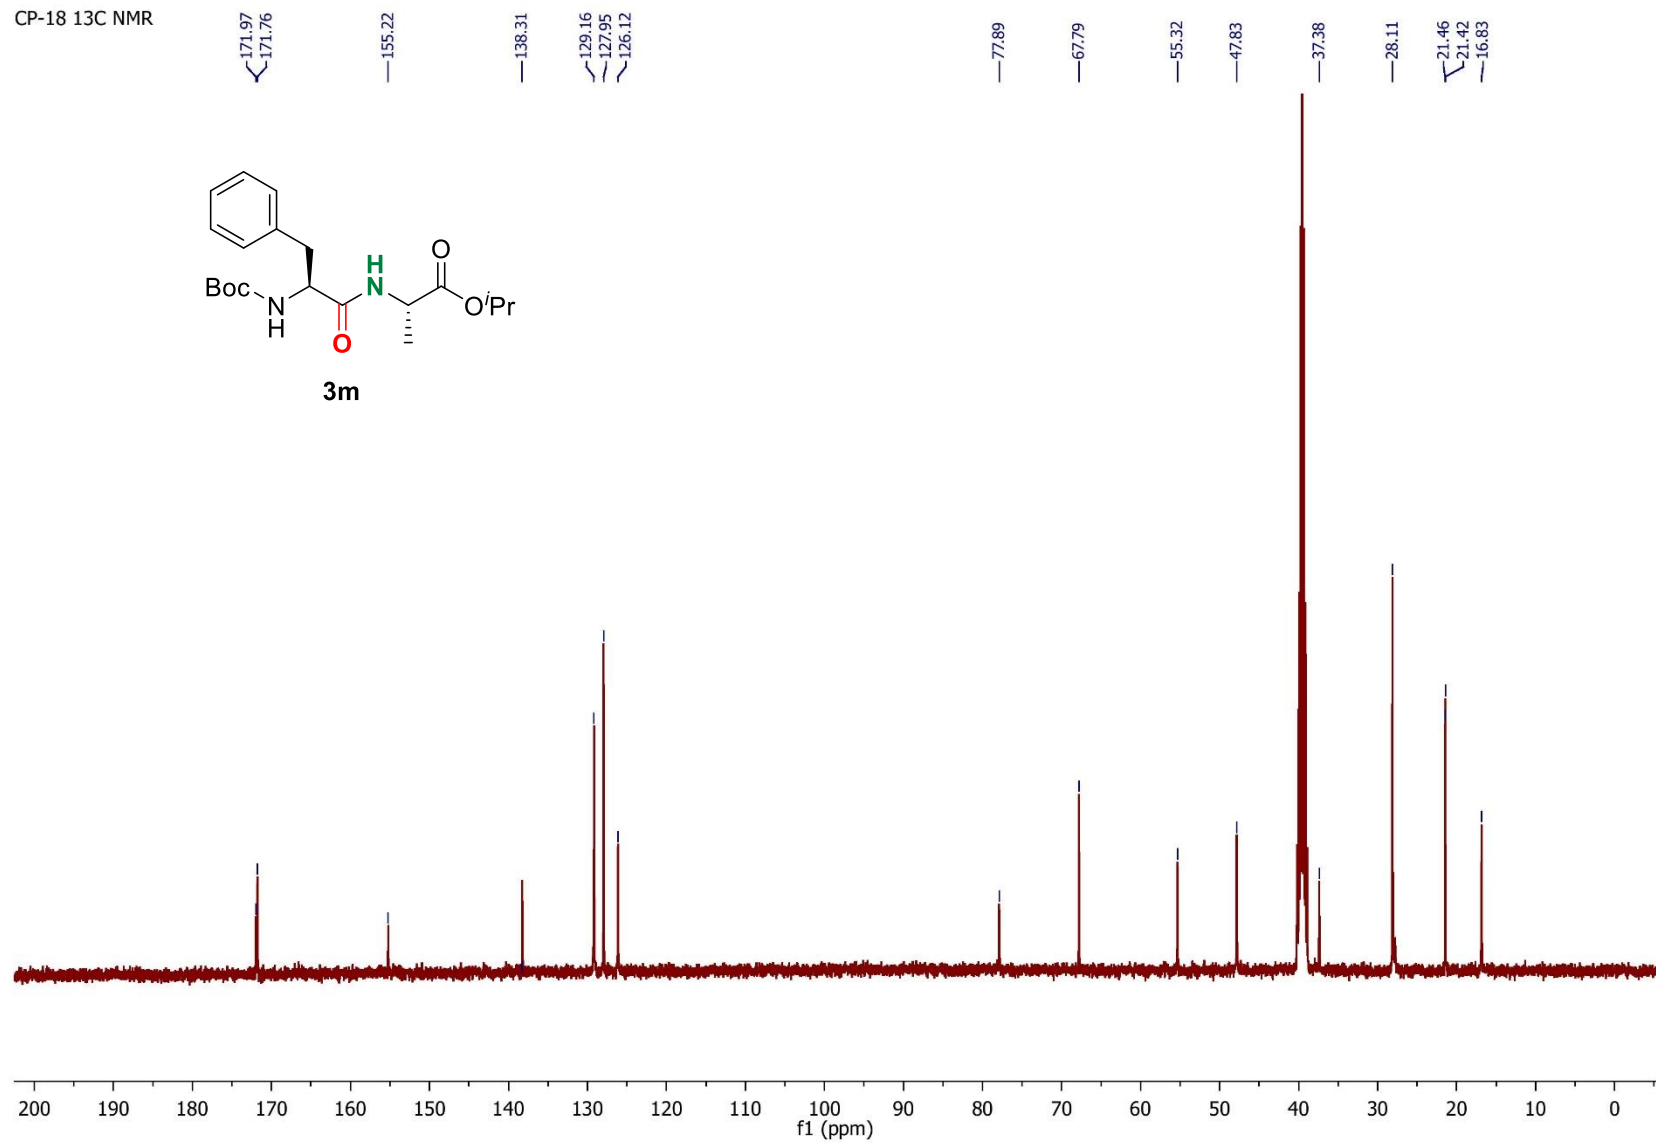

Figure S54. <sup>13</sup>C NMR Spectrum of **3m** (101MHz, DMSO-d<sub>6</sub>)

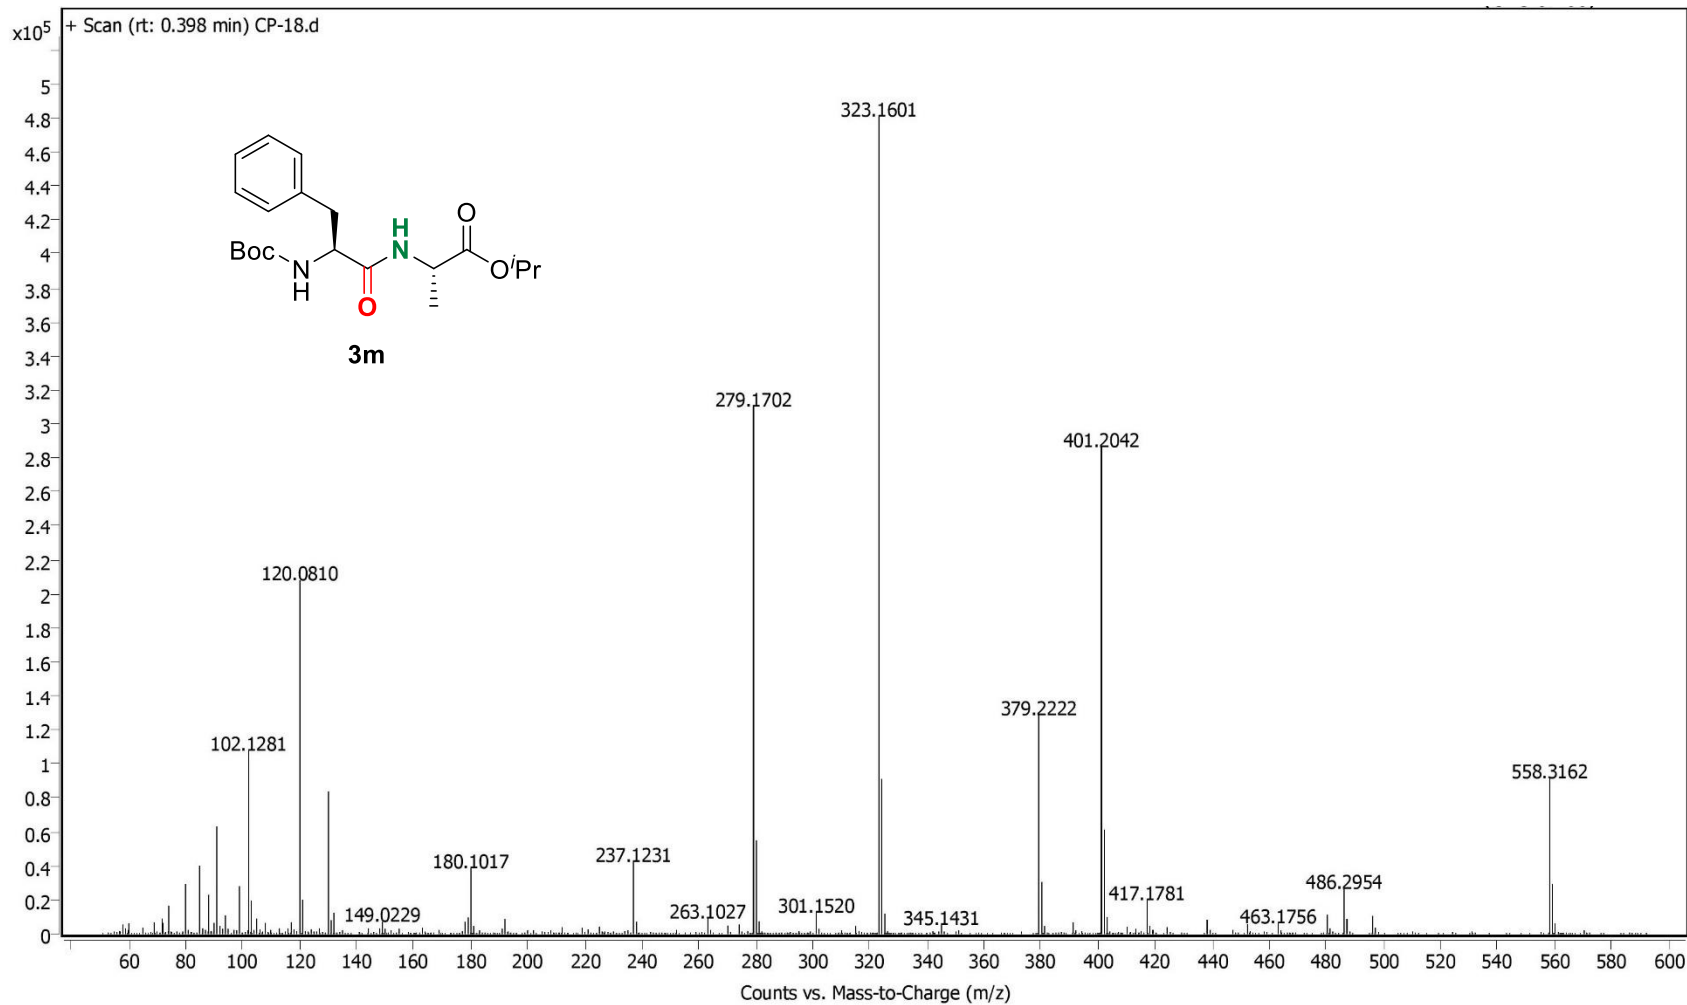

**Figure S55.** HRMS Spectrum of **3m**

CP-6 <sup>1</sup>H NMR

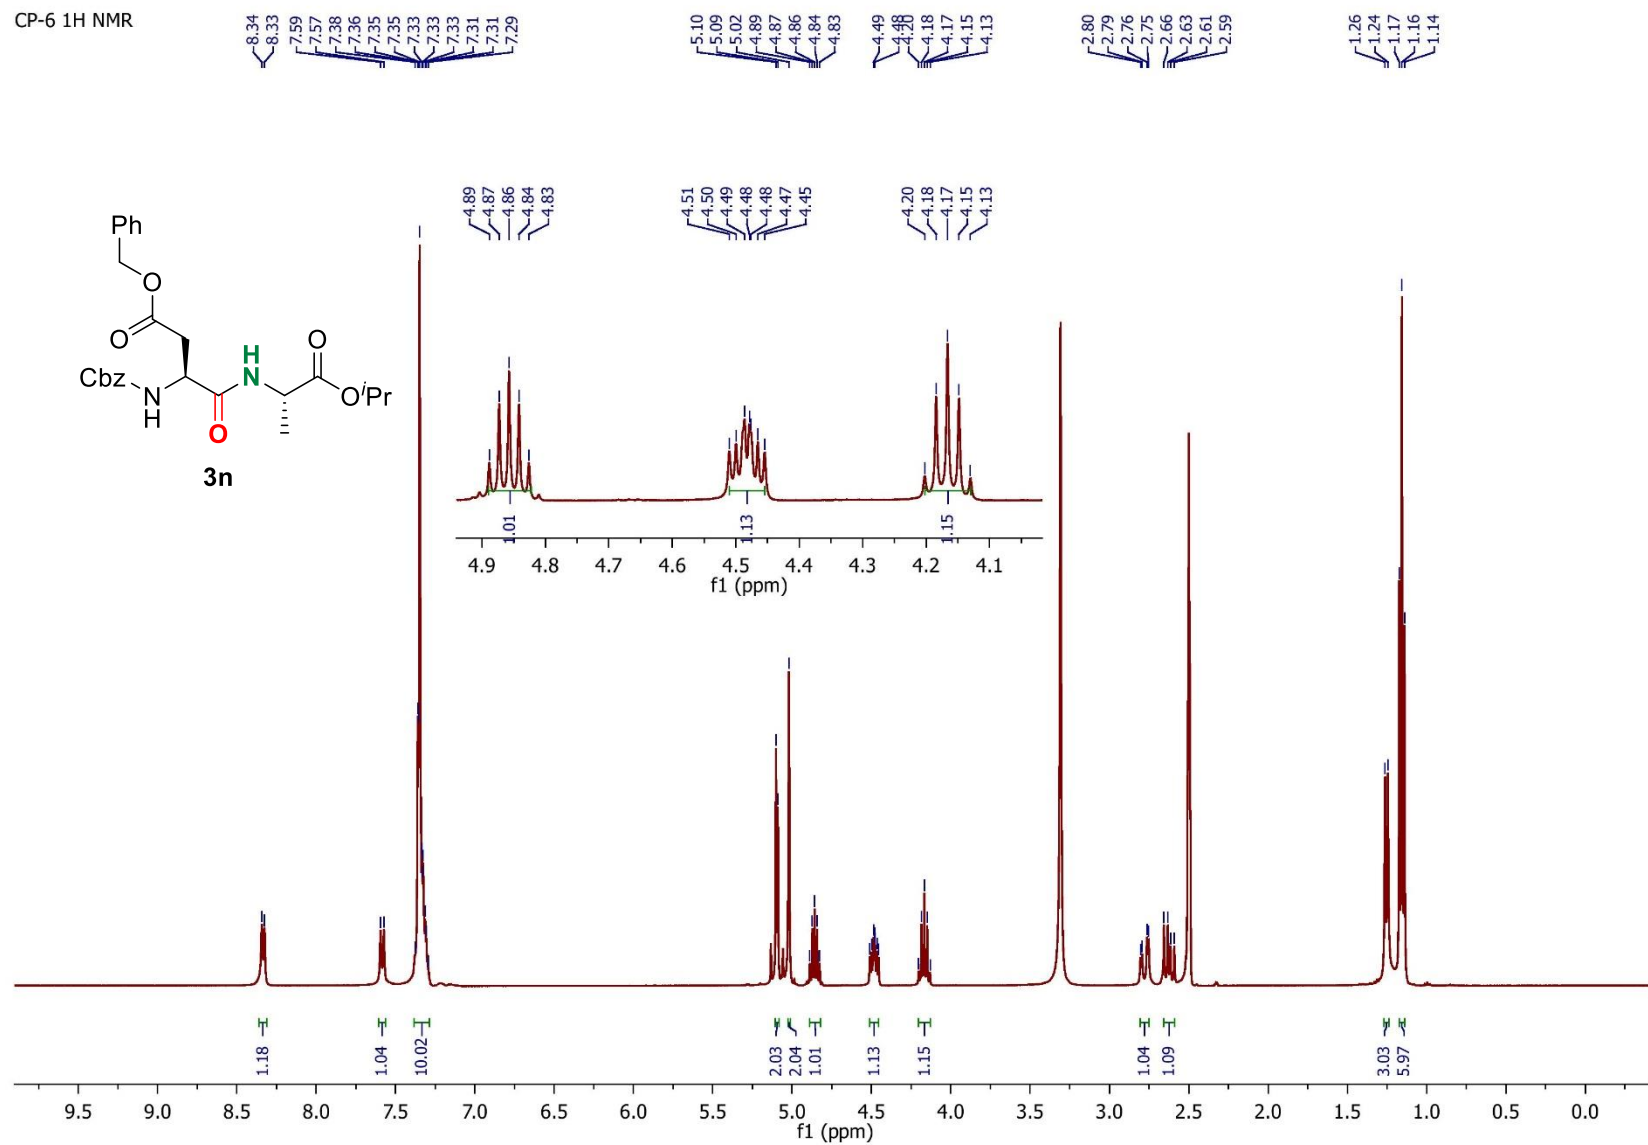

Figure S56. <sup>1</sup>H NMR Spectrum of 3n (400MHz, DMSO-d<sub>6</sub>)

CP-6 <sup>13</sup>C NMR

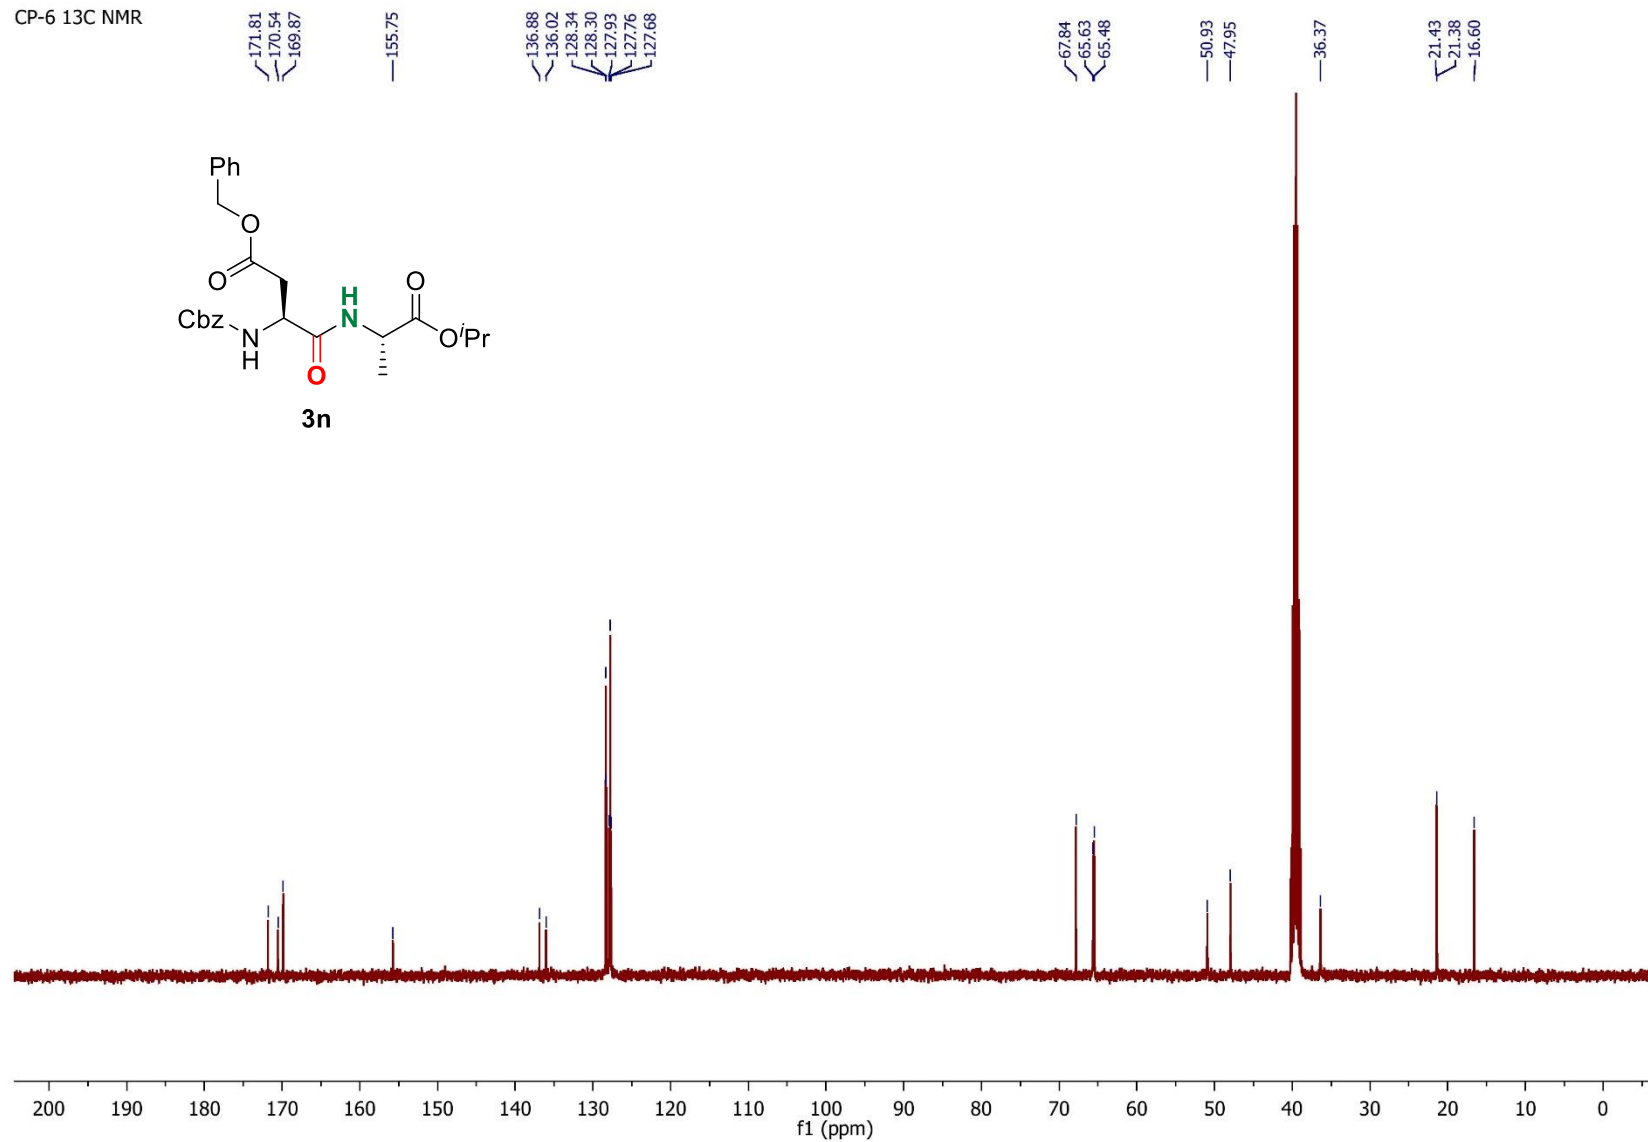

Figure S57. <sup>13</sup>C NMR Spectrum of **3n** (101MHz, DMSO-d<sub>6</sub>)



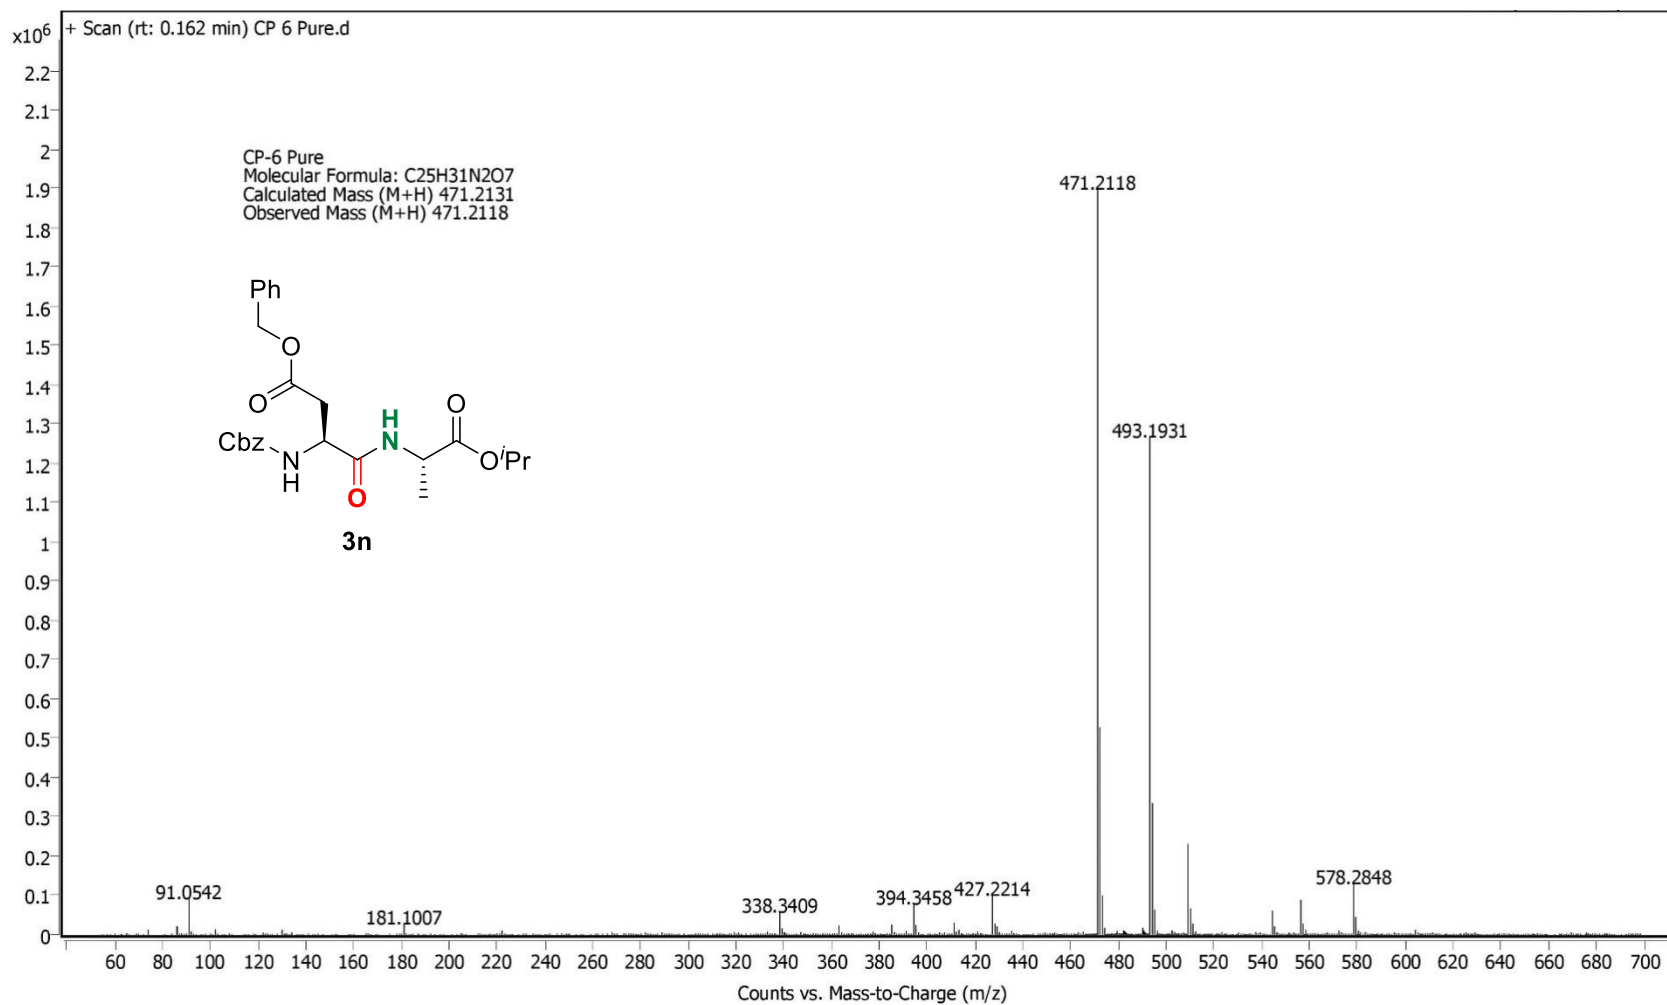

Figure S58. HRMS Spectrum of **3n**

CP-12 1H NMR

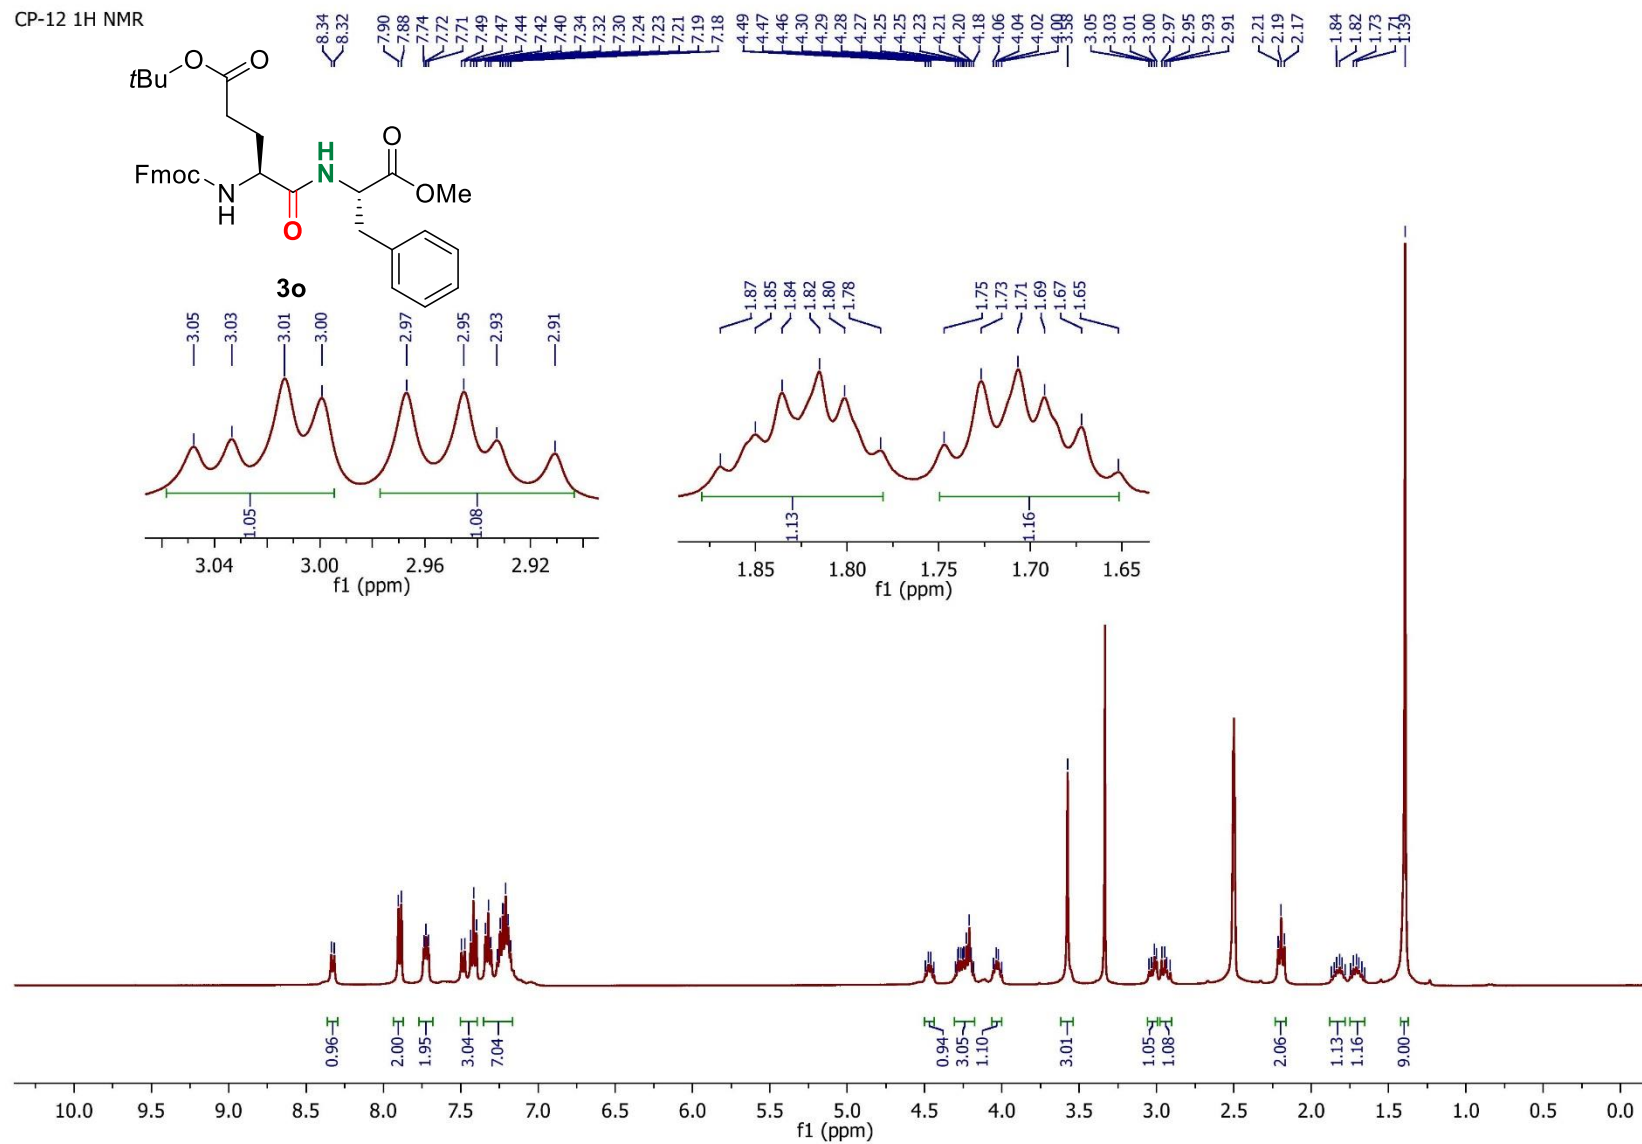

Figure S59.  $^1\text{H}$  NMR Spectrum of **3o** (400MHz, DMSO- $d_6$ )

CP- 12 13C NMR

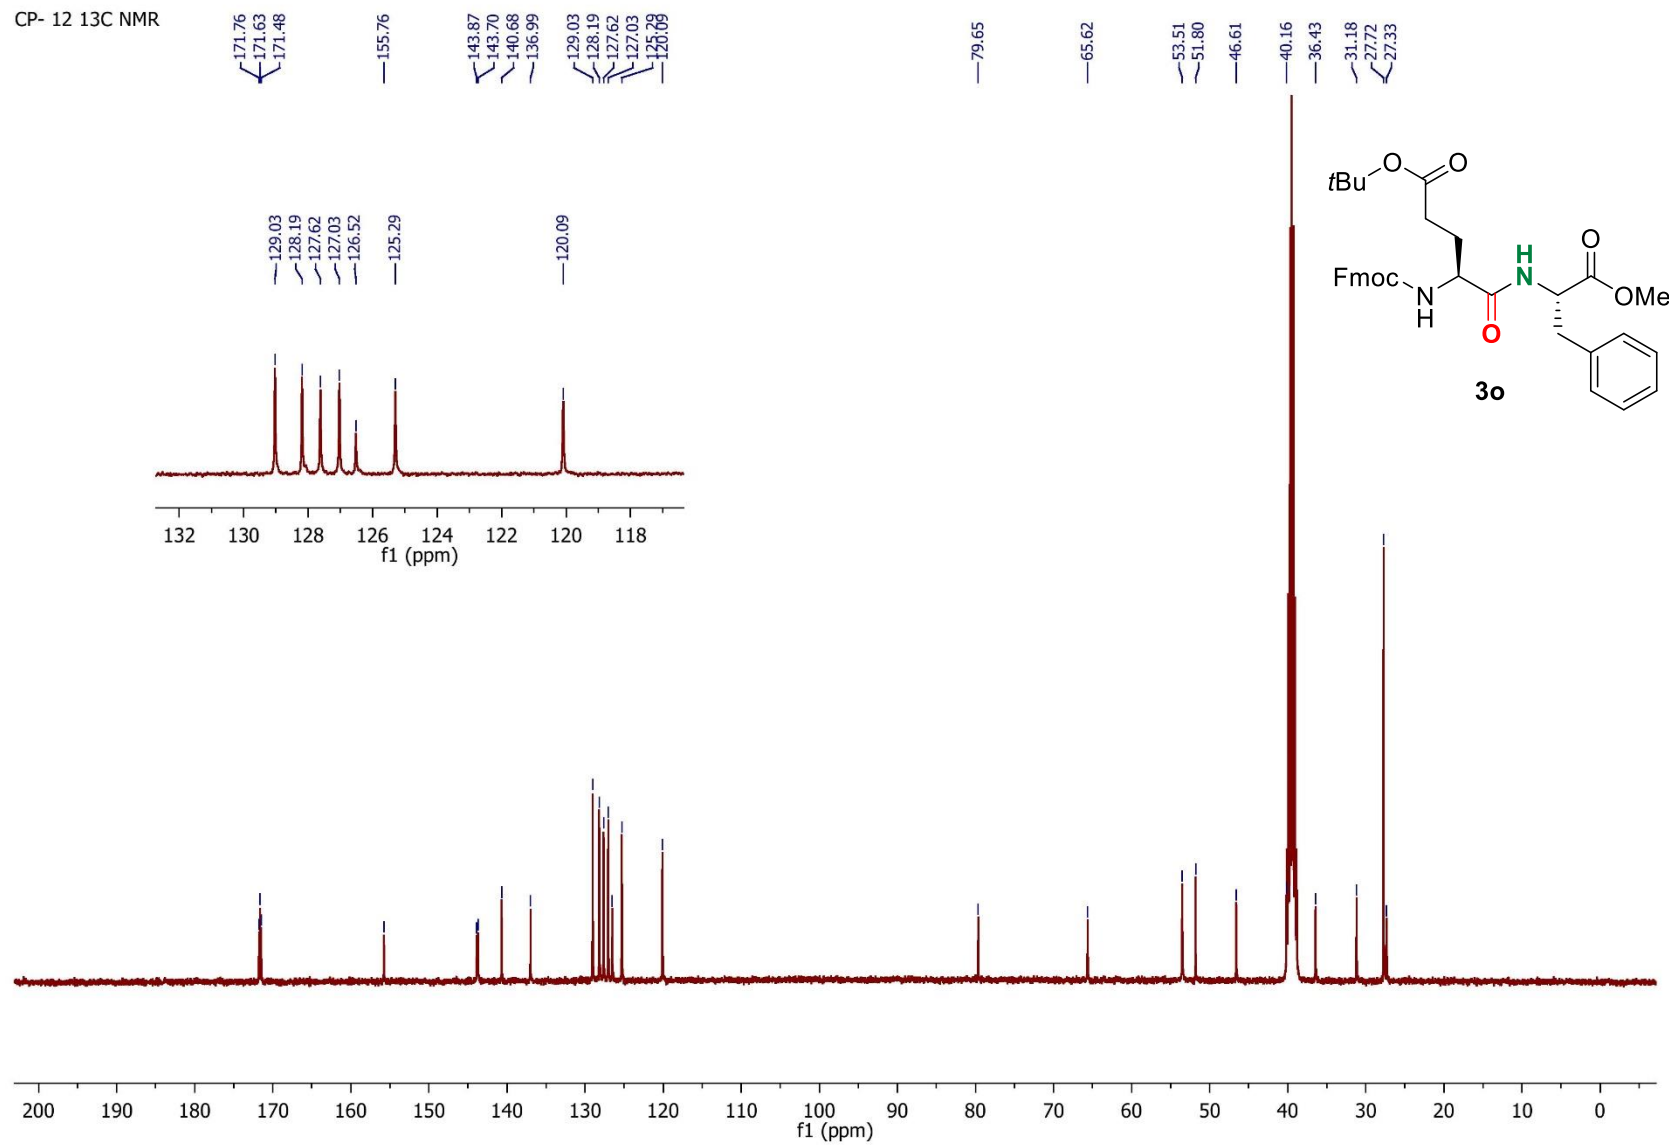

Figure S60. <sup>13</sup>C NMR Spectrum of **3o** (101MHz, DMSO-d<sub>6</sub>)

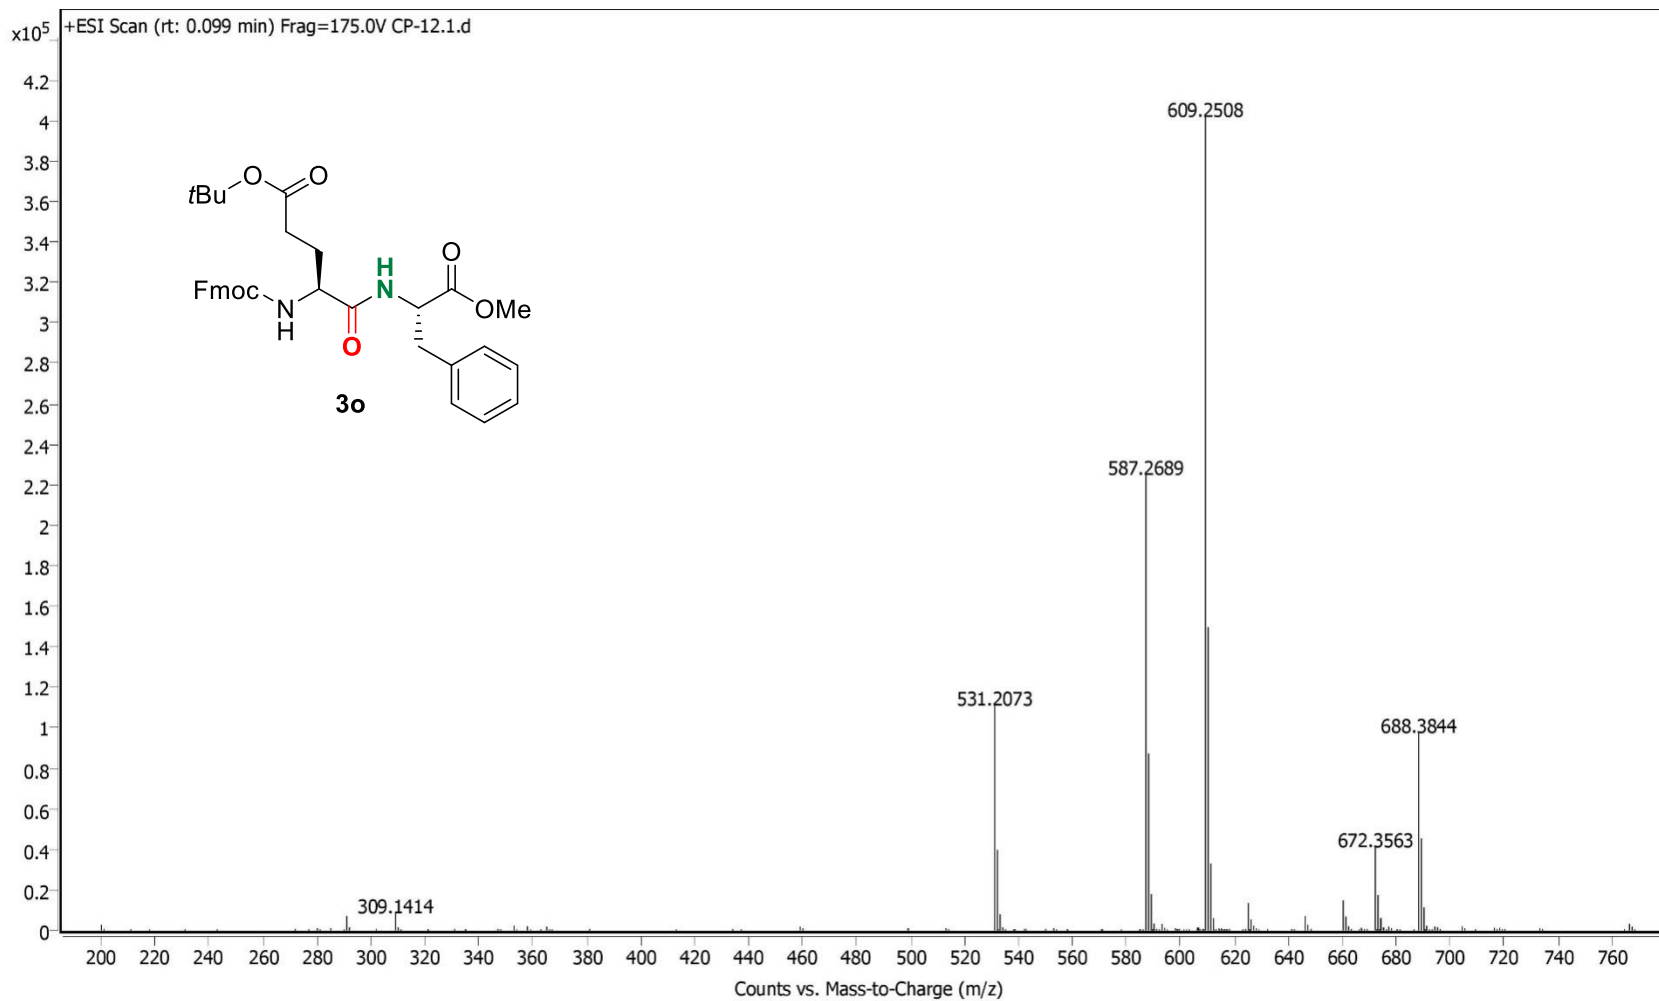

**Figure S61.** HRMS Spectrum of **3o**

CP-13 1H NMR

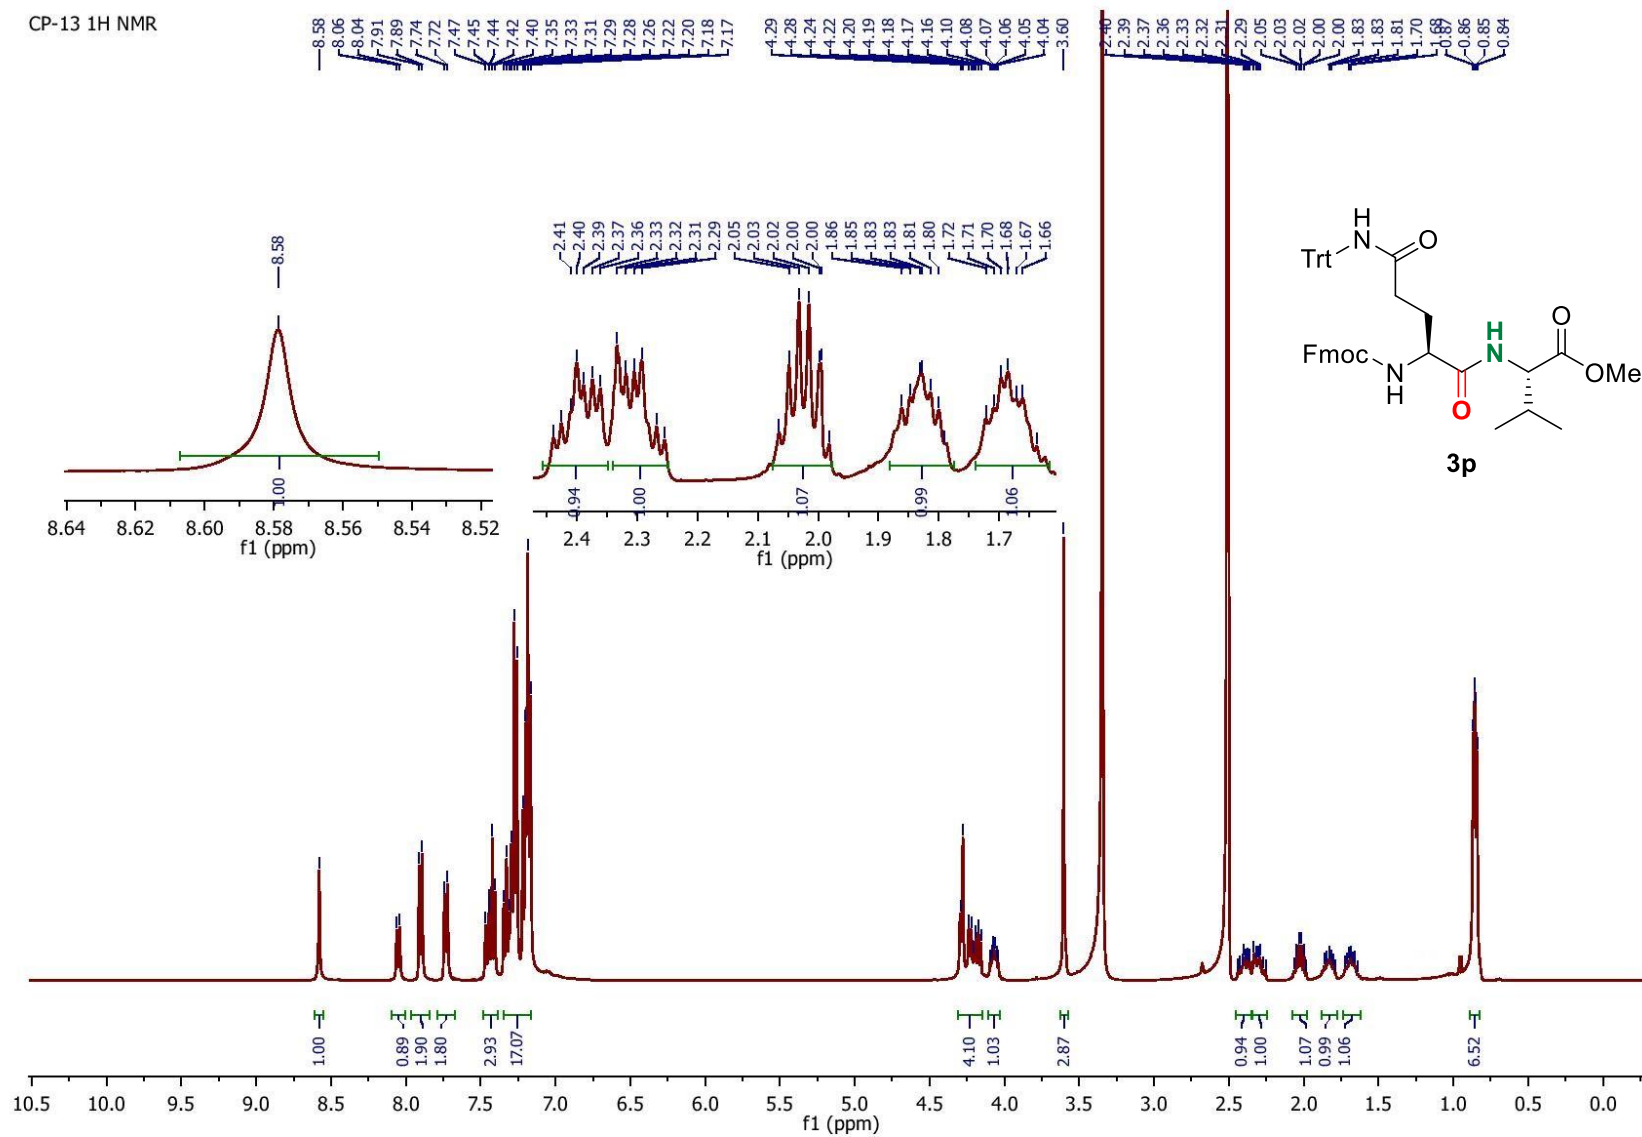

Figure S62. <sup>1</sup>H NMR Spectrum of 3p (400MHz, DMSO-d<sub>6</sub>)

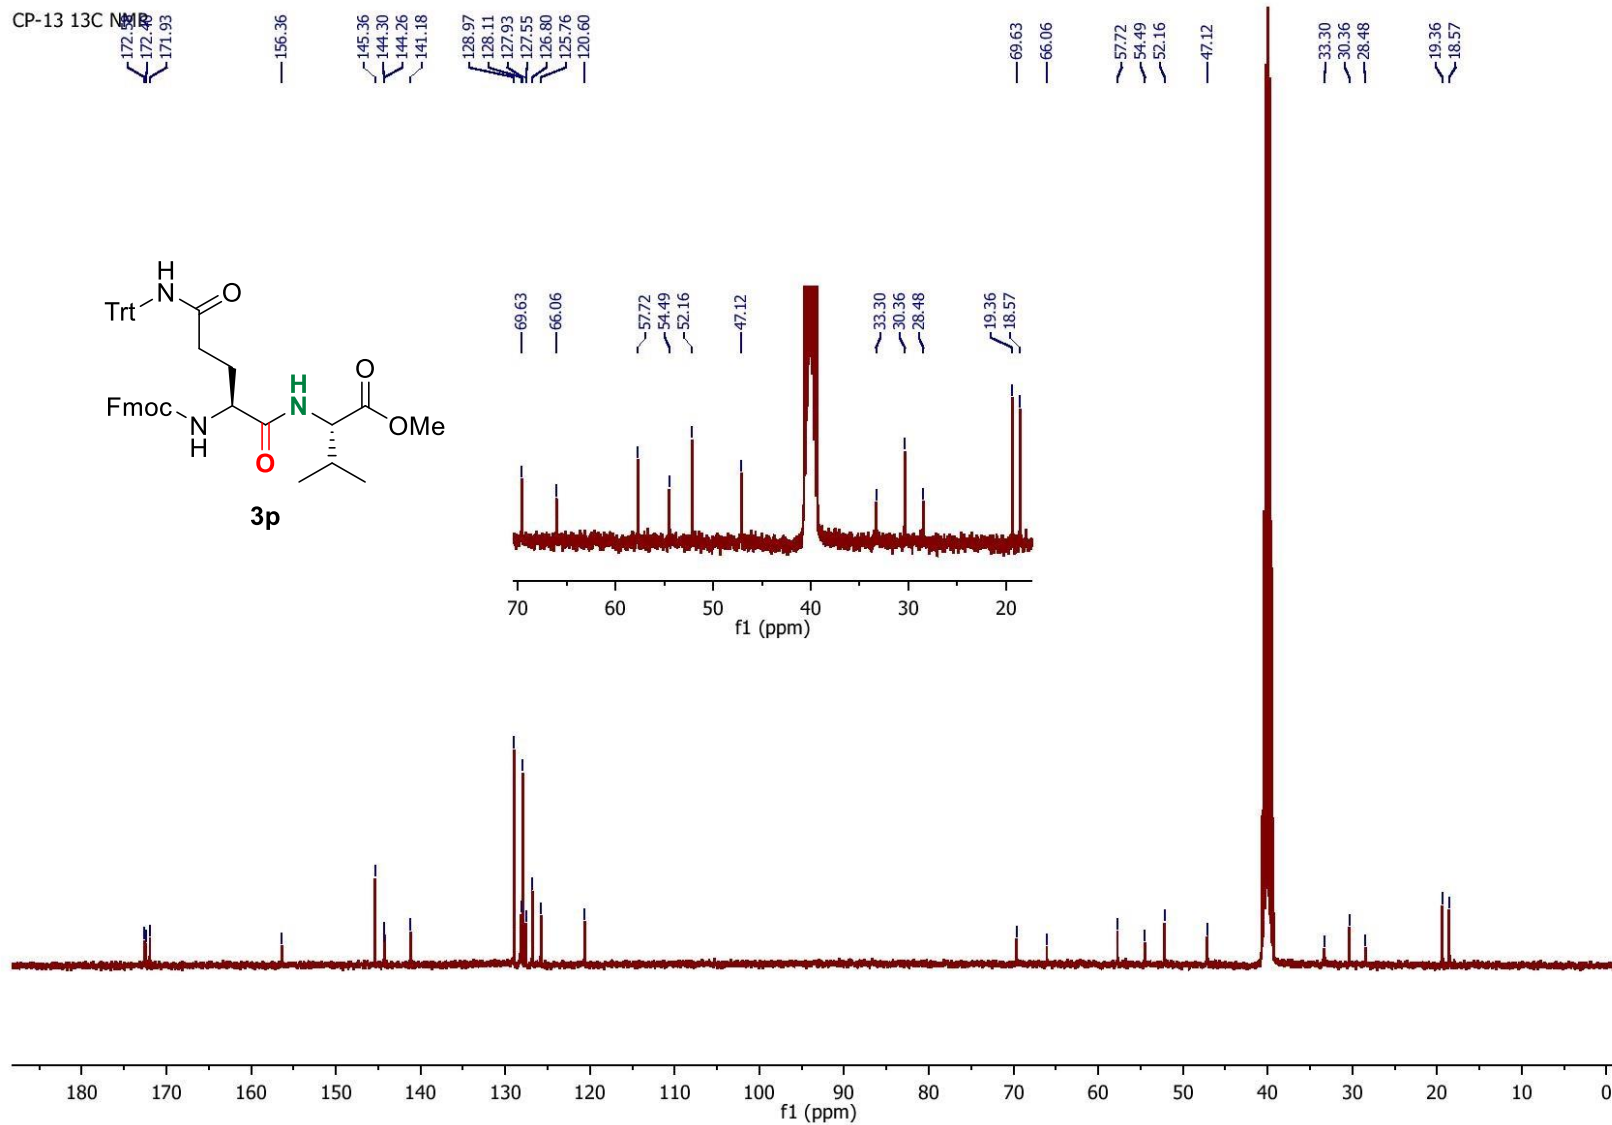

Figure S63.  $^{13}\text{C}$  NMR Spectrum of **3p** (101MHz,  $\text{DMSO-d}_6$ )

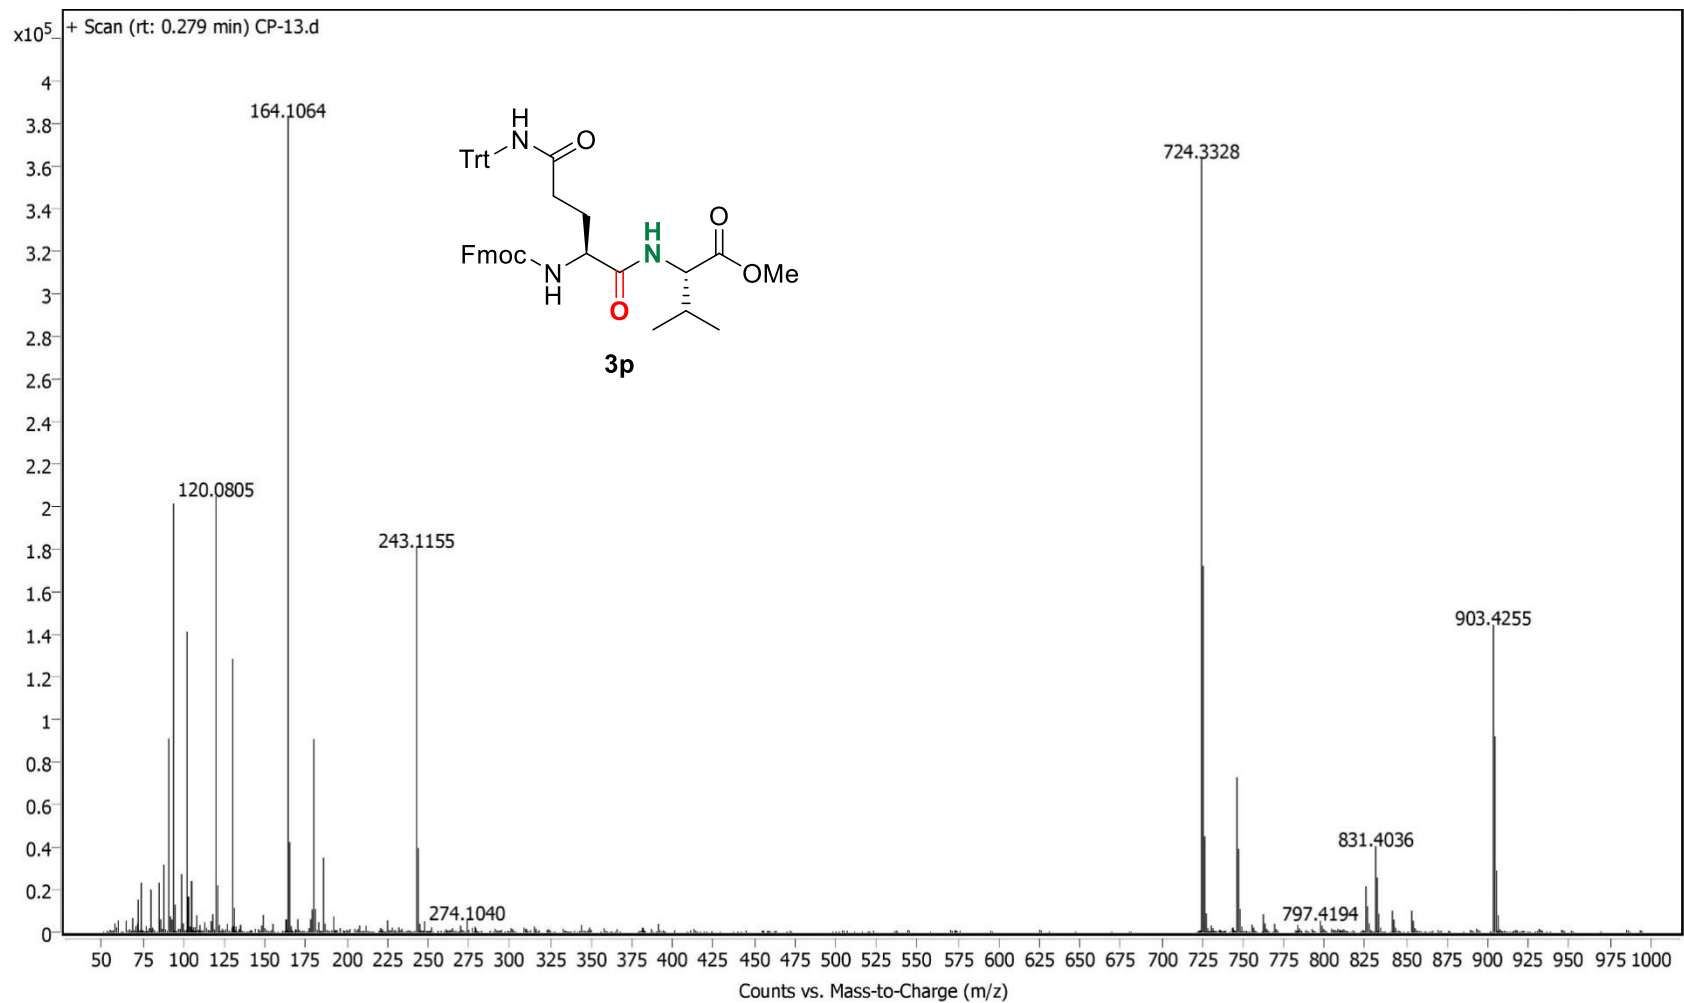

**Figure S64.** HRMS Spectrum of **3p**

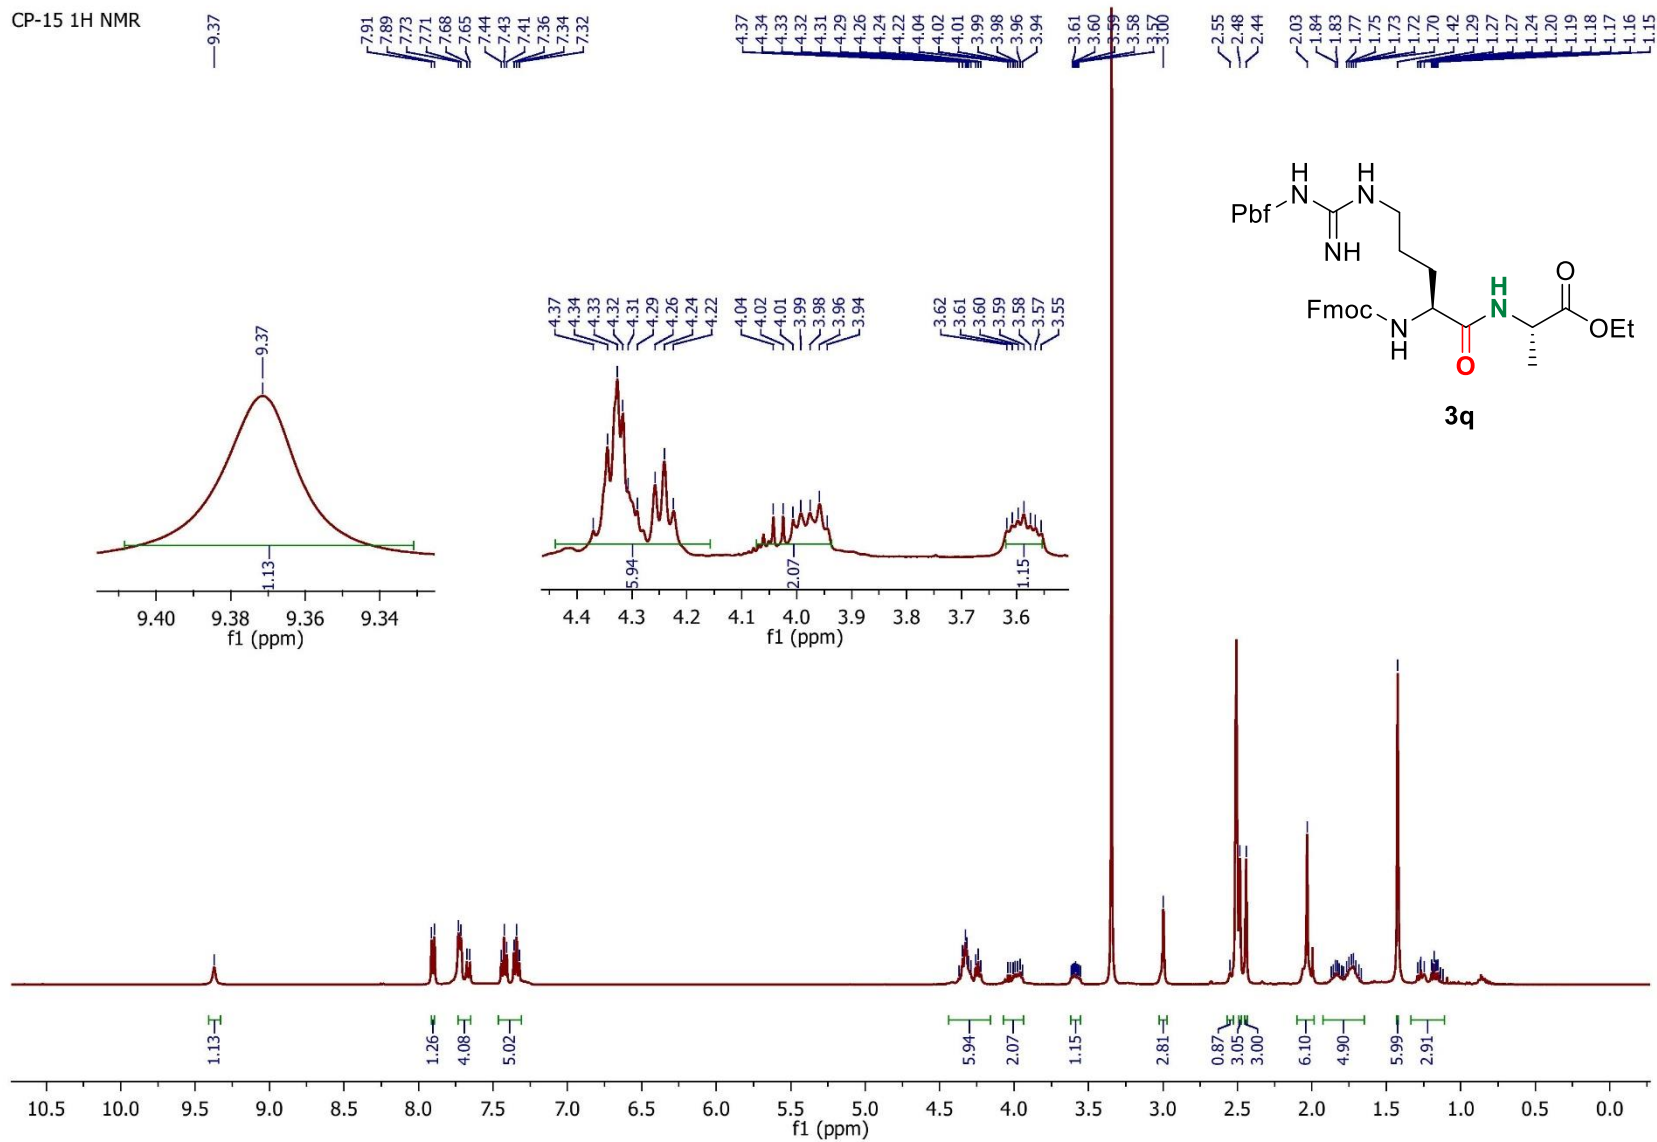

Figure S65. <sup>1</sup>H NMR Spectrum of **3q** (400MHz, DMSO-d<sub>6</sub>)



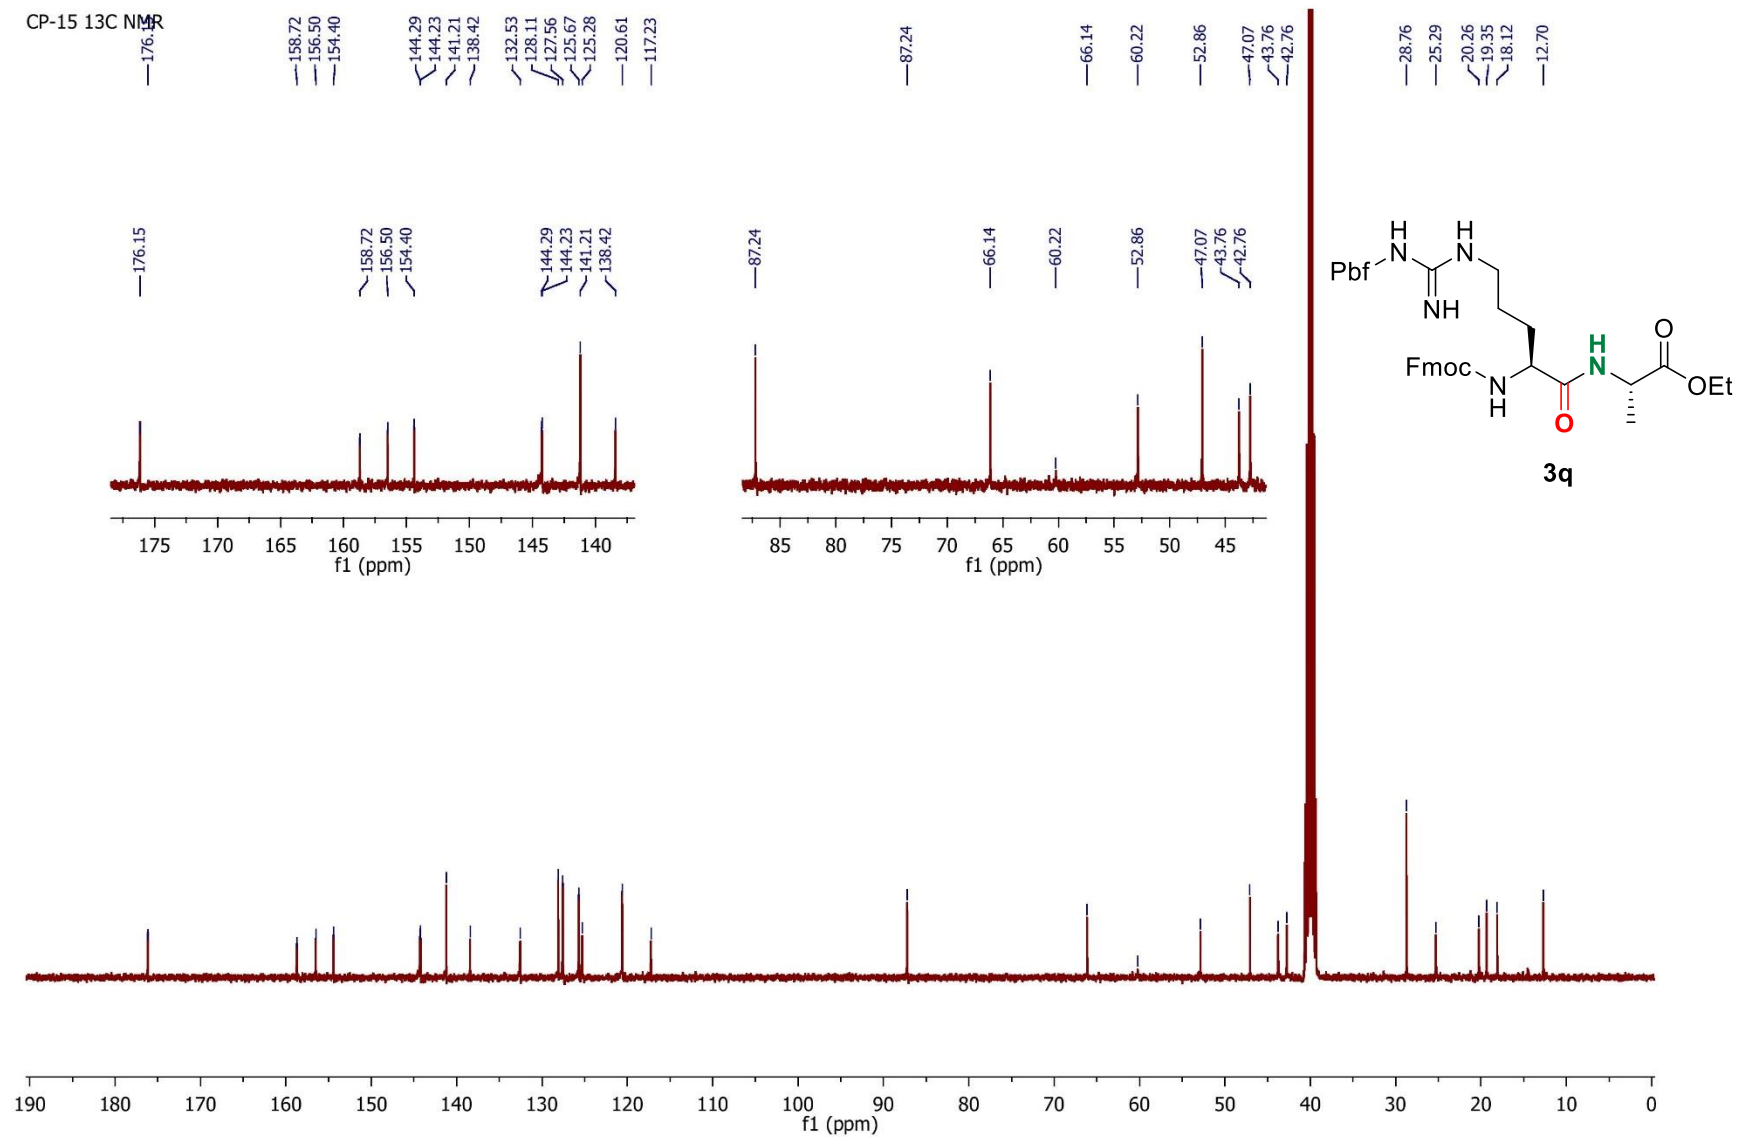

**Figure S66.**  $^{13}\text{C}$  NMR Spectrum of **3q** (101MHz,  $\text{DMSO-d}_6$ )

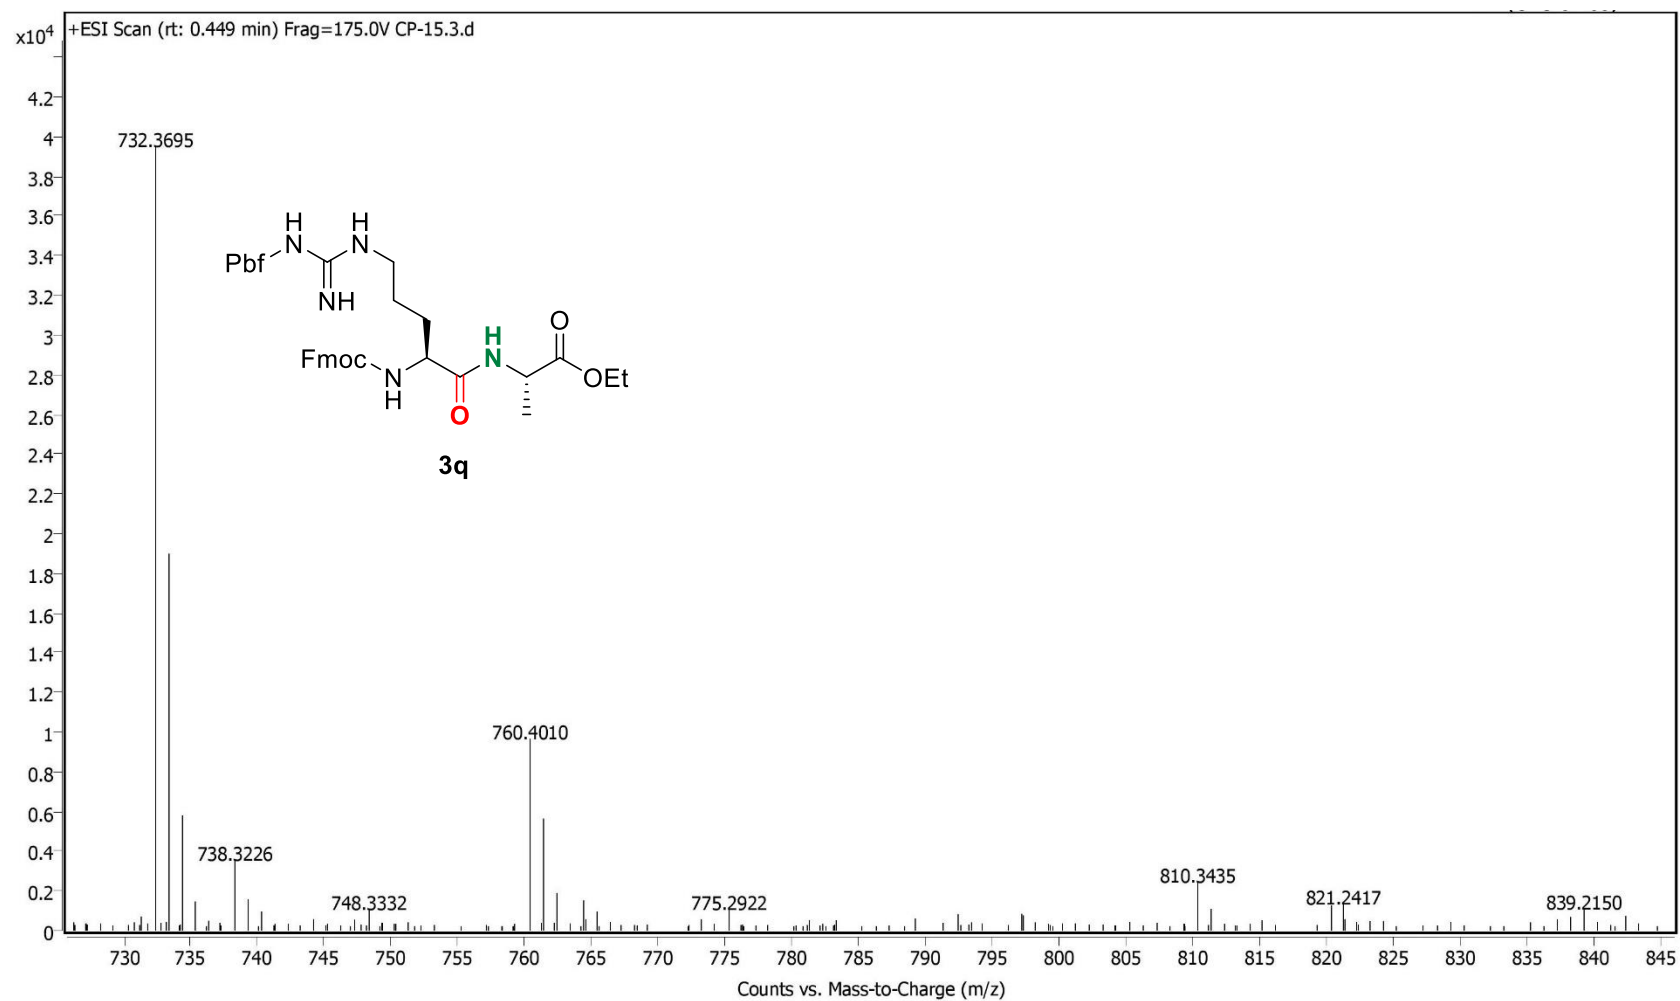

**Figure S67.** HRMS Spectrum of **3q**

CP11 1H NMR

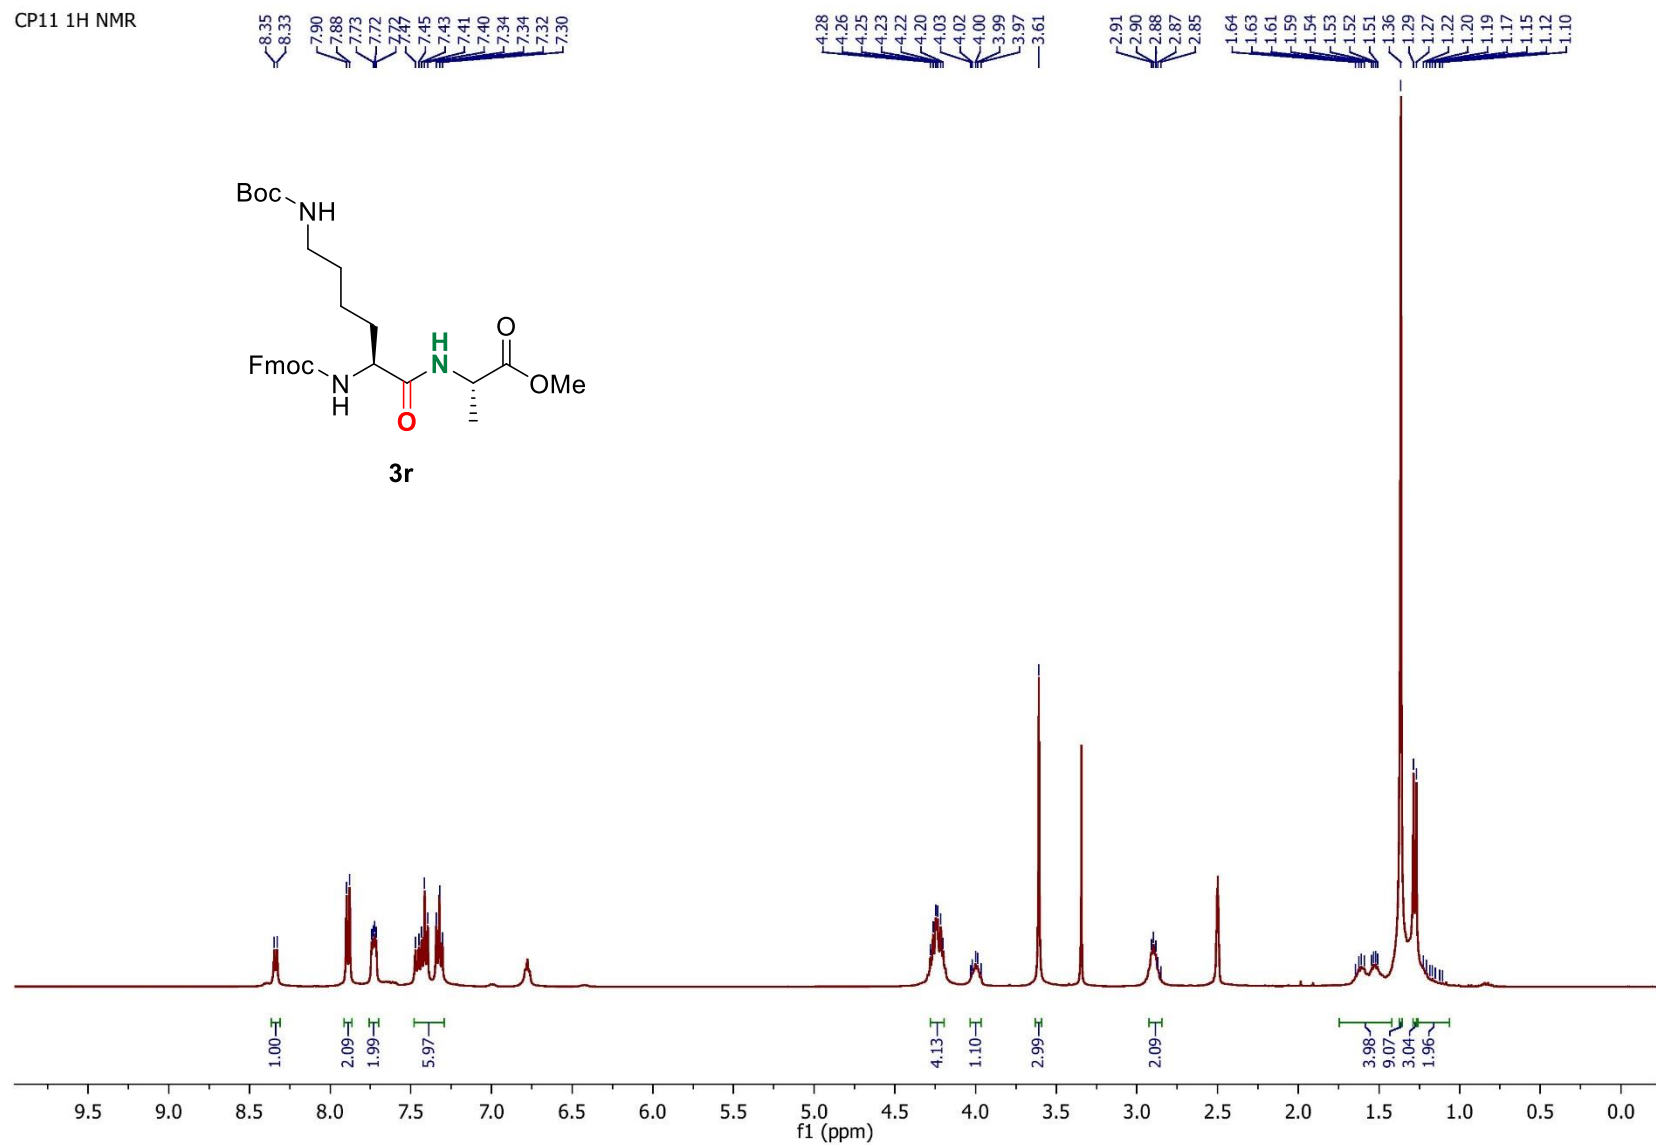

Figure S68. <sup>1</sup>H NMR Spectrum of **3r** (400MHz, DMSO-d<sub>6</sub>)

CP-11 <sup>13</sup>C NMR

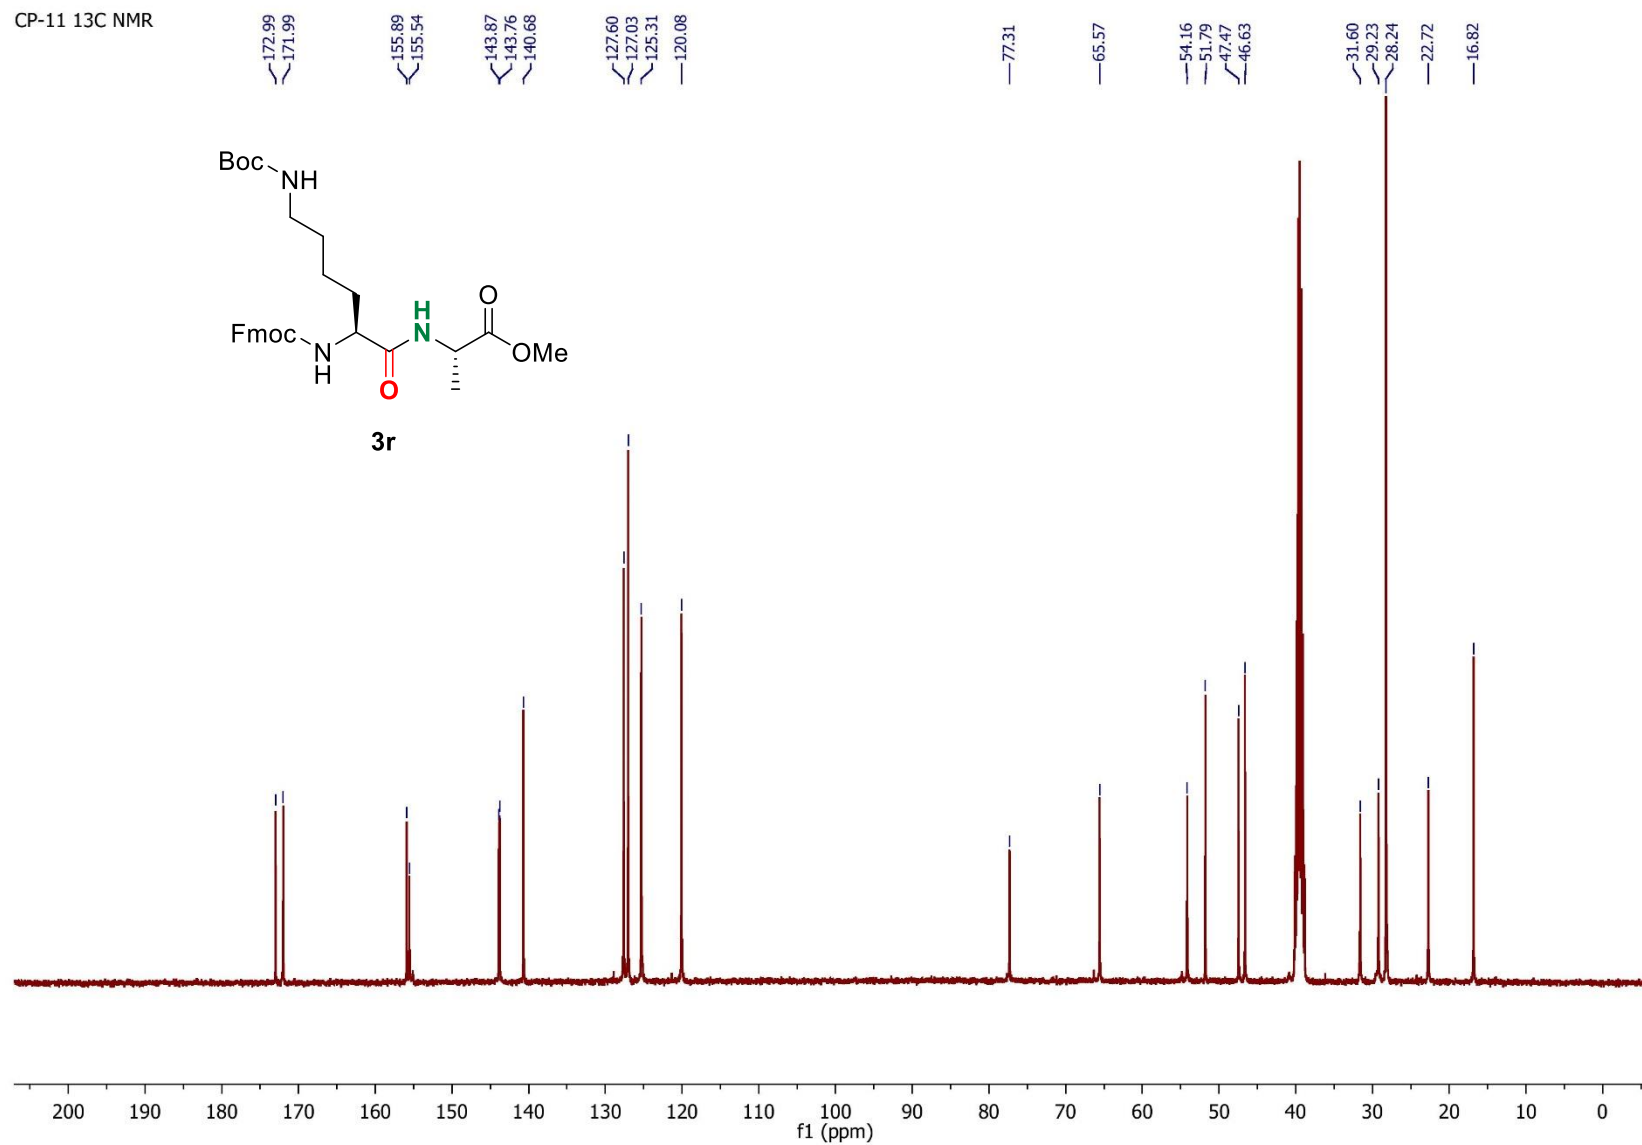

**Figure S69.** <sup>13</sup>C NMR Spectrum of 3r (101MHz, DMSO-d<sub>6</sub>)

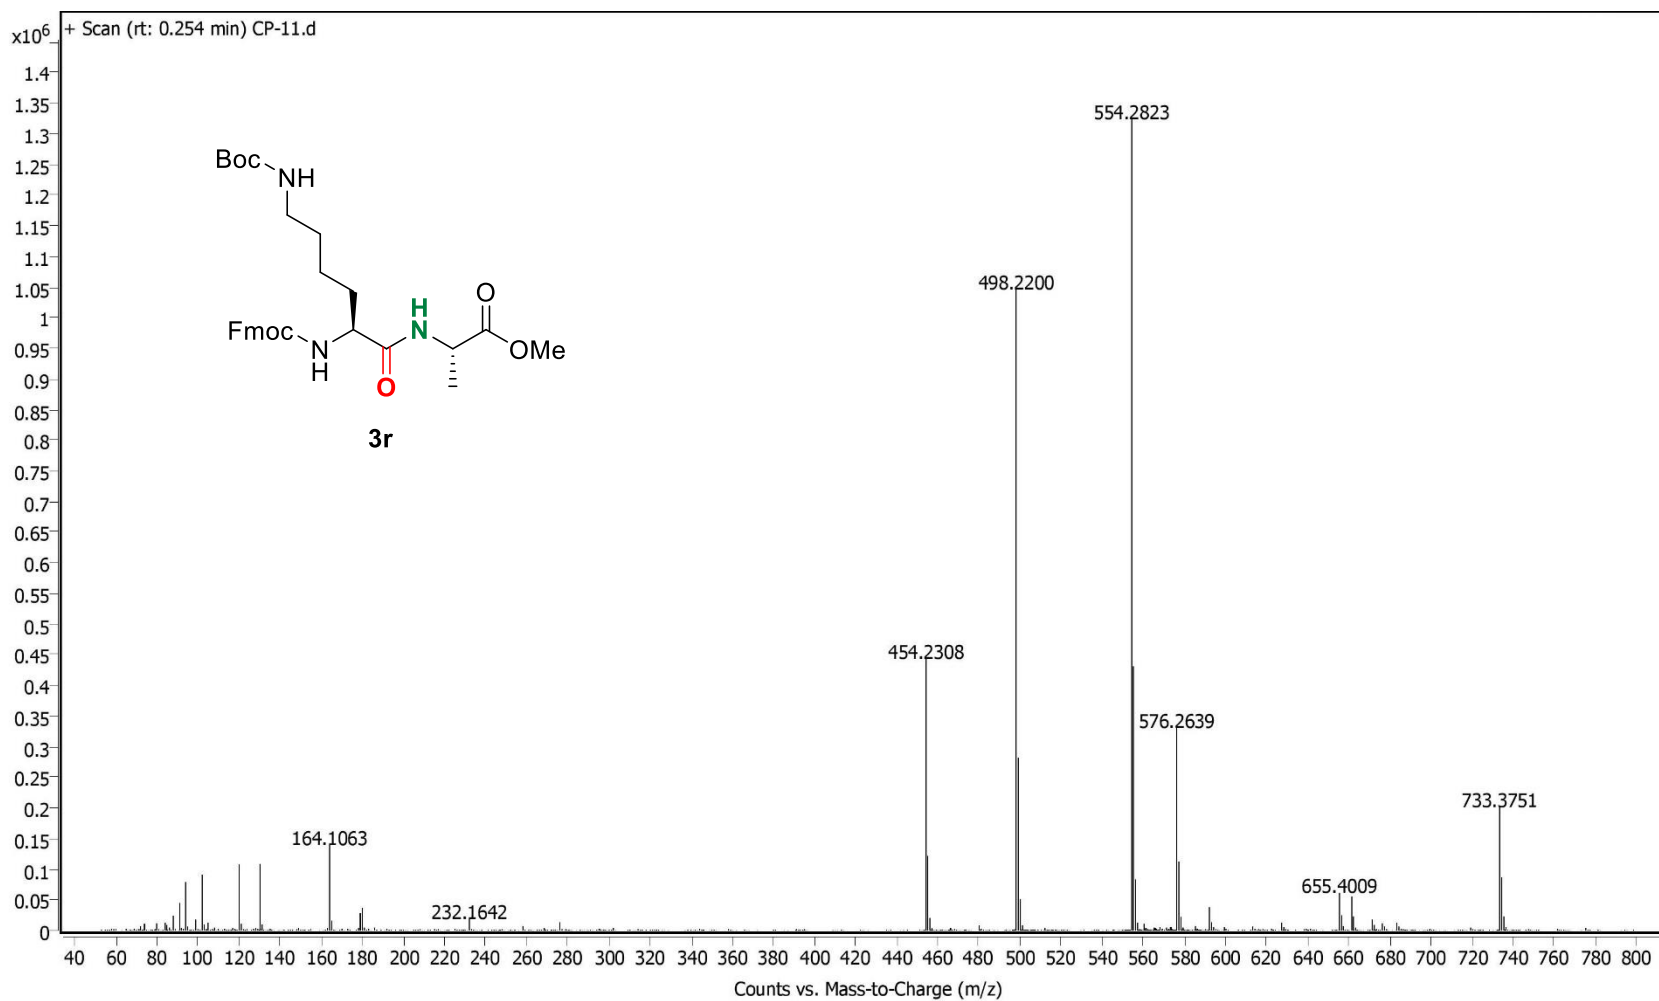

**Figure S70.** HRMS Spectrum of **3r**

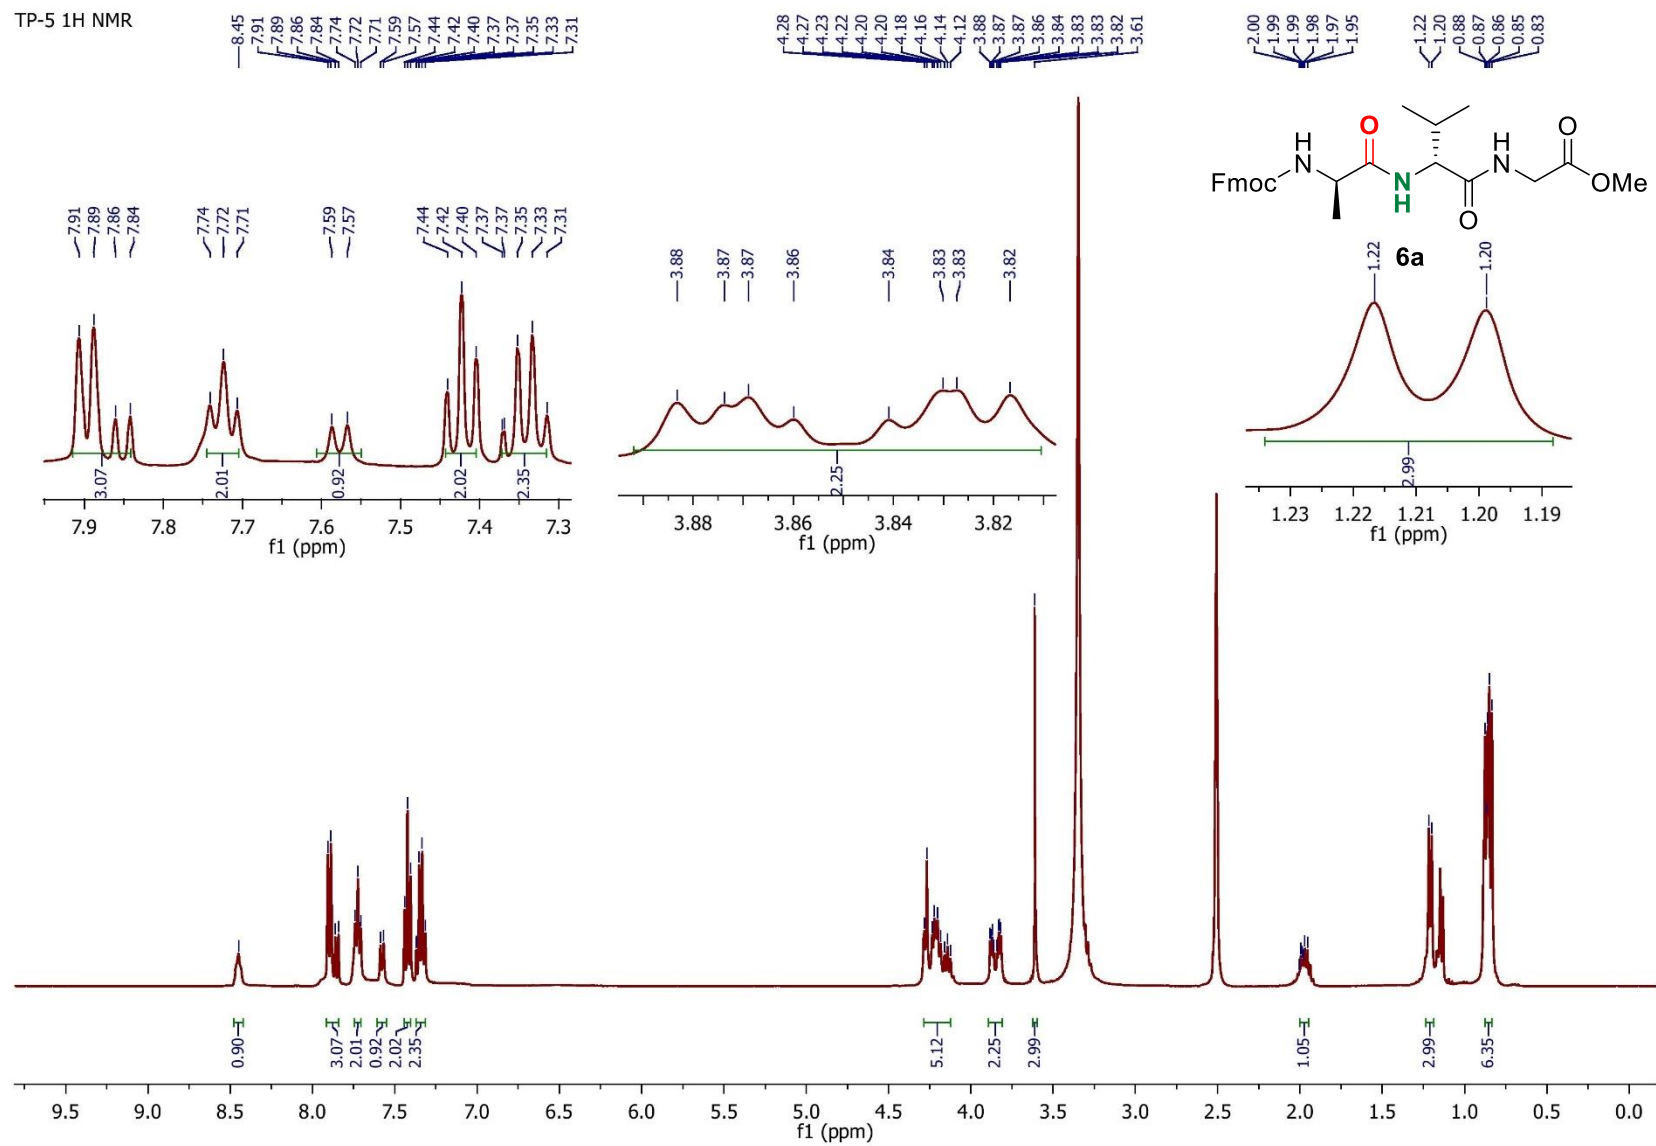

Figure S71.  $^1\text{H}$  NMR Spectrum of **6a** (400MHz,  $\text{DMSO-d}_6$ )

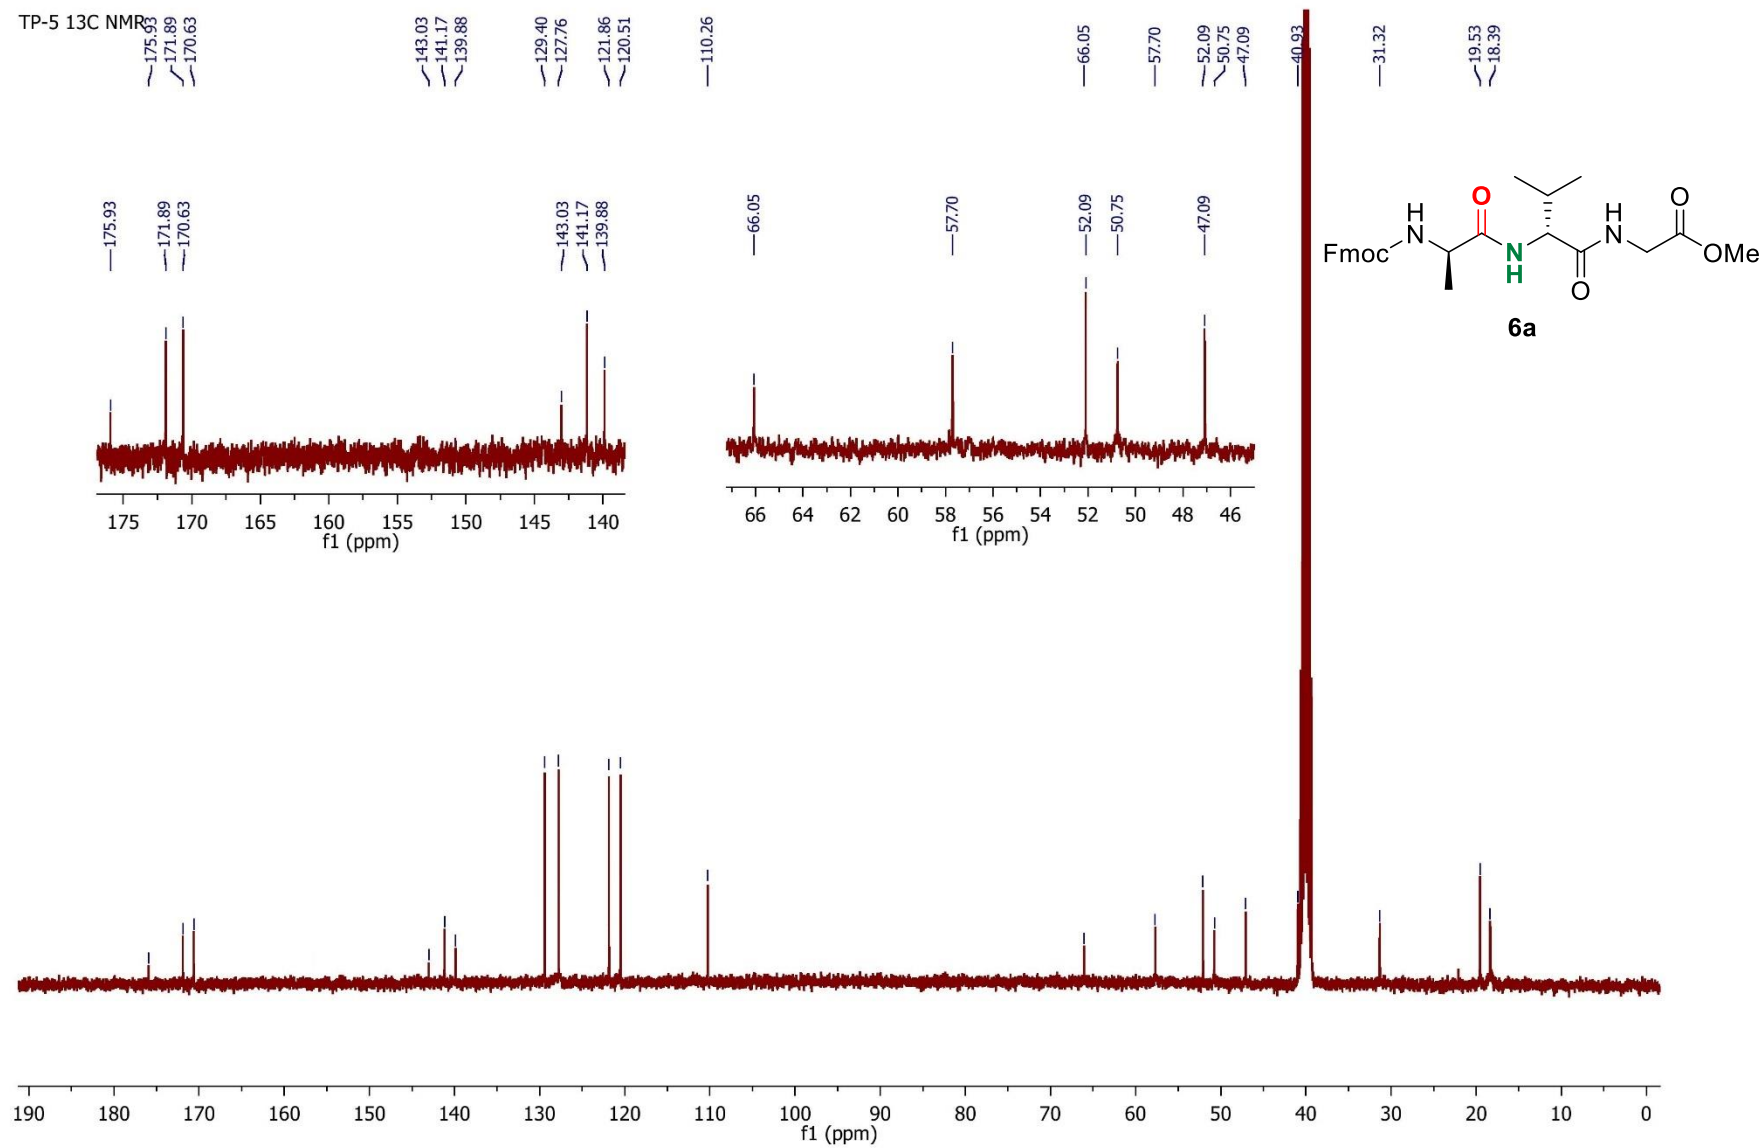

**Figure S72.** <sup>13</sup>C NMR Spectrum of (101MHz, DMSO-d<sub>6</sub>)

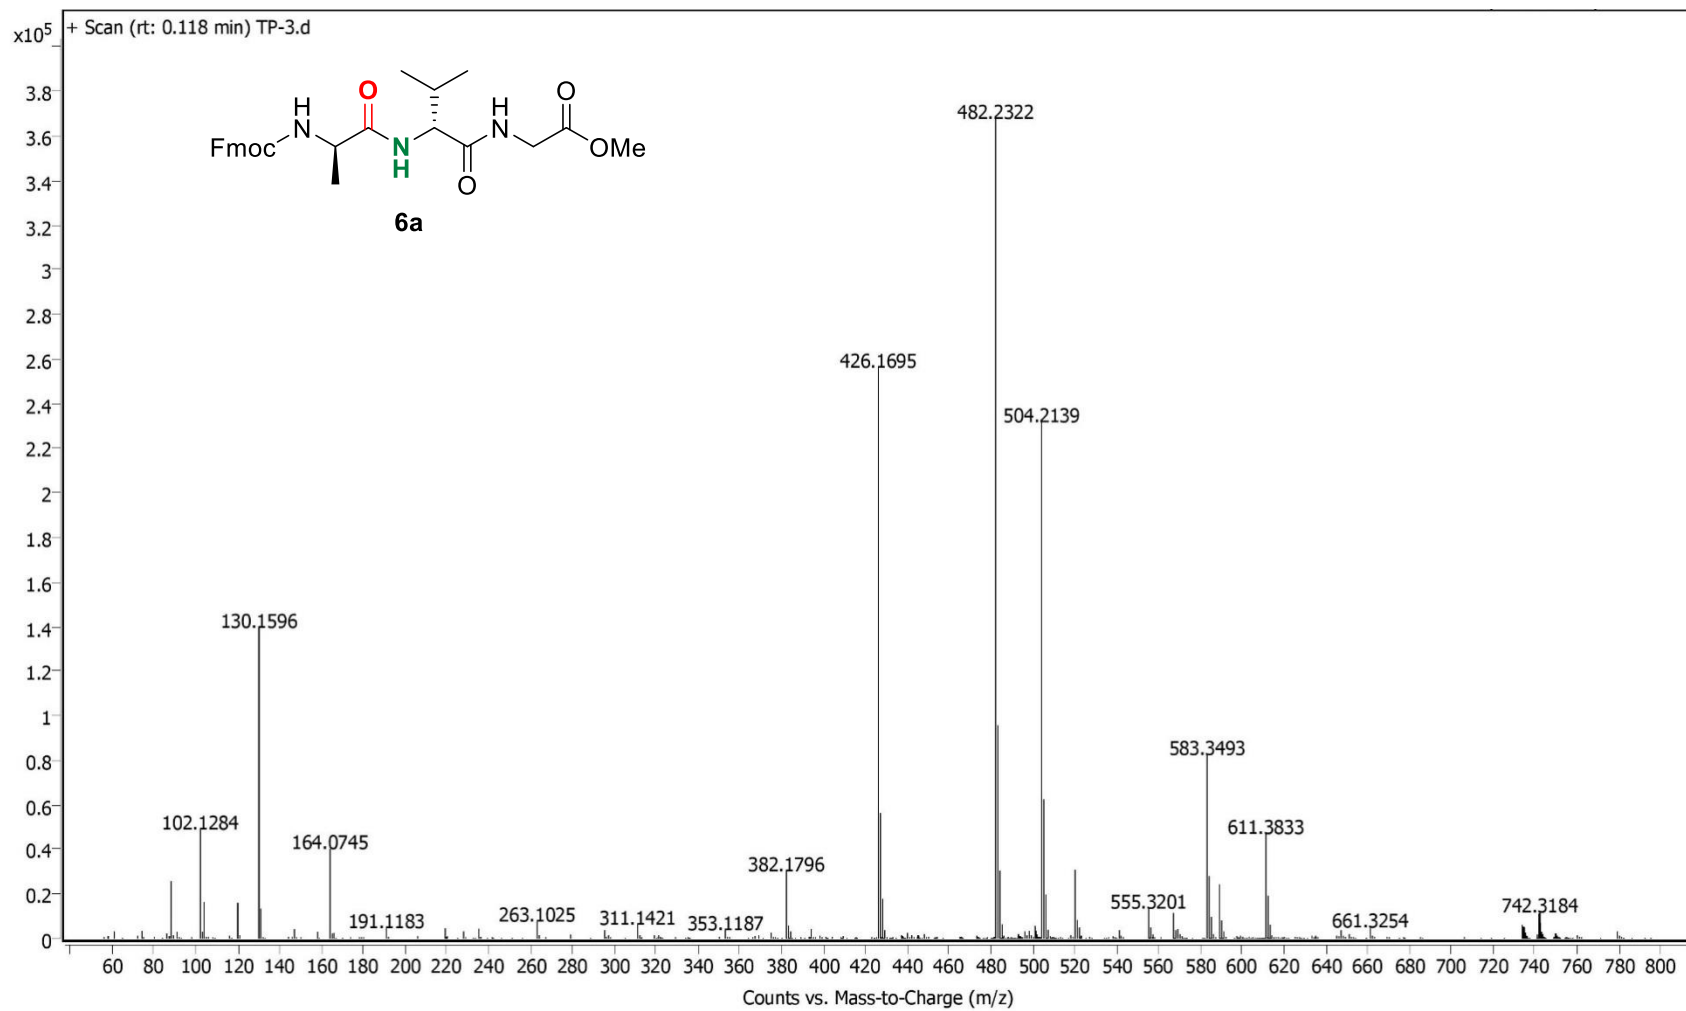

**Figure S73.** HRMS Spectrum of **6a**



TP-3 1H NMR

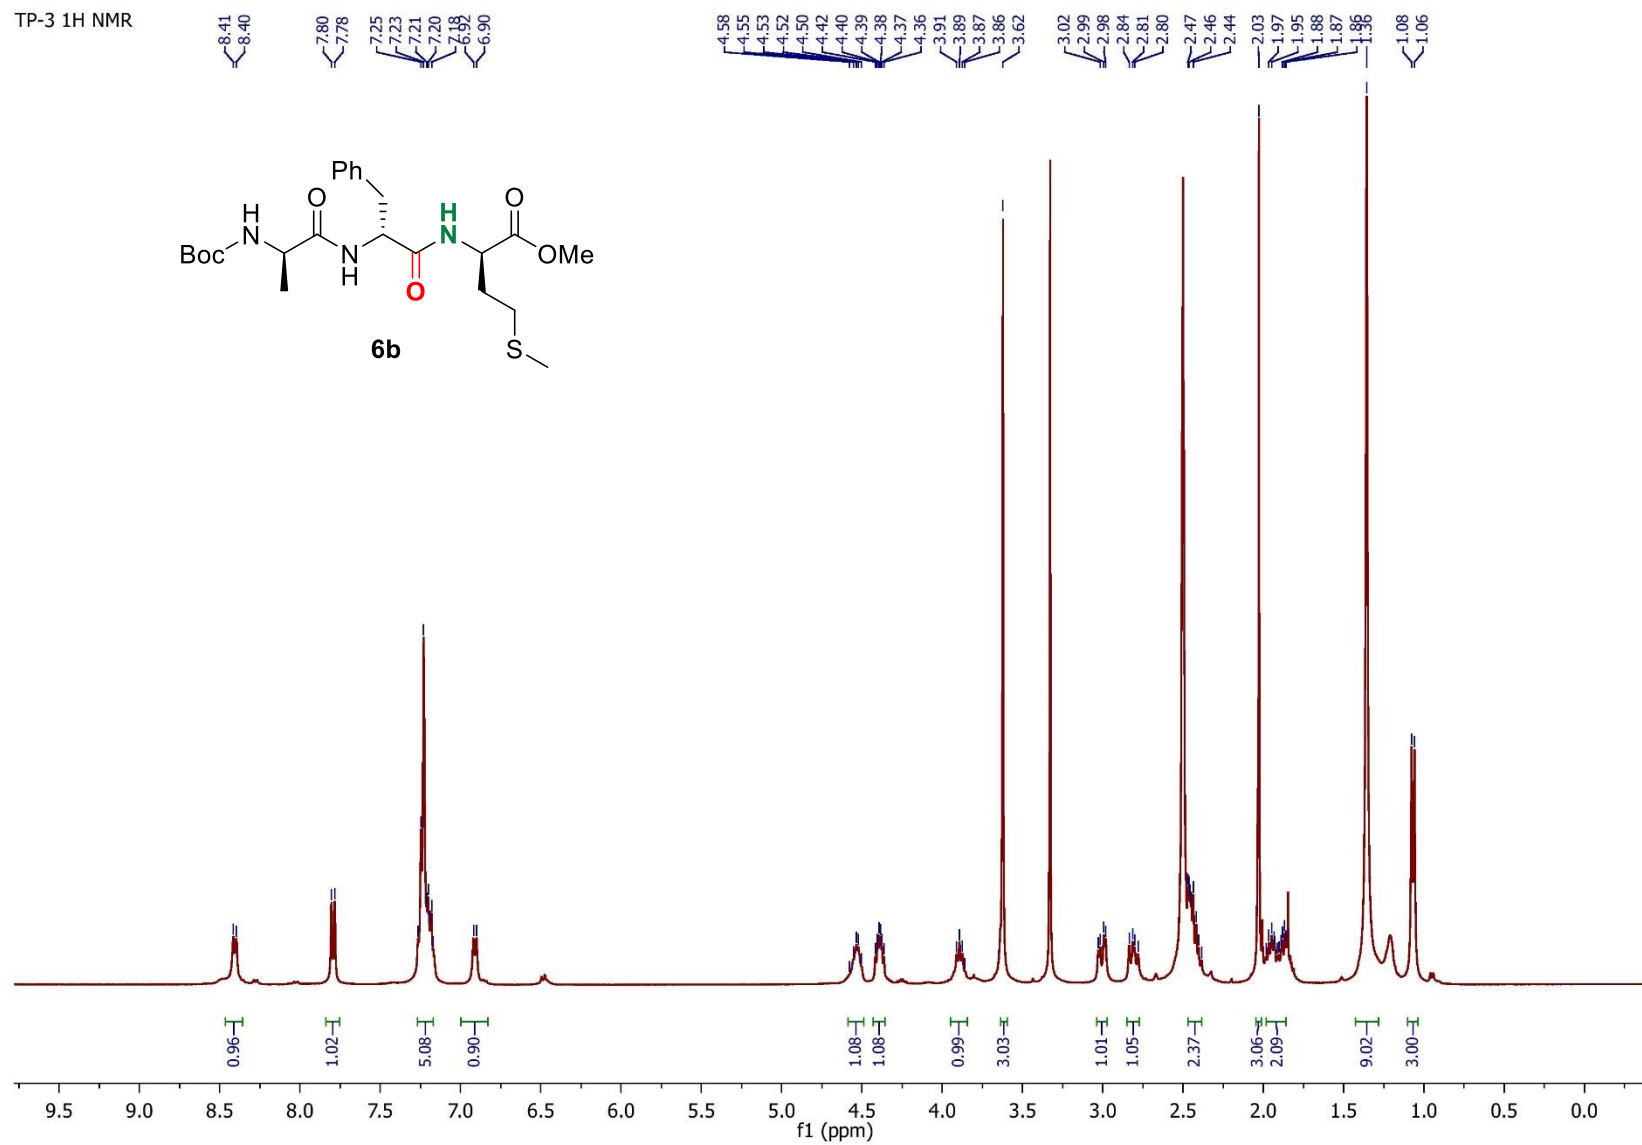

Figure S74. <sup>1</sup>H NMR Spectrum of **6b** (400MHz, DMSO-d<sub>6</sub>)

TP-3 13C NMR

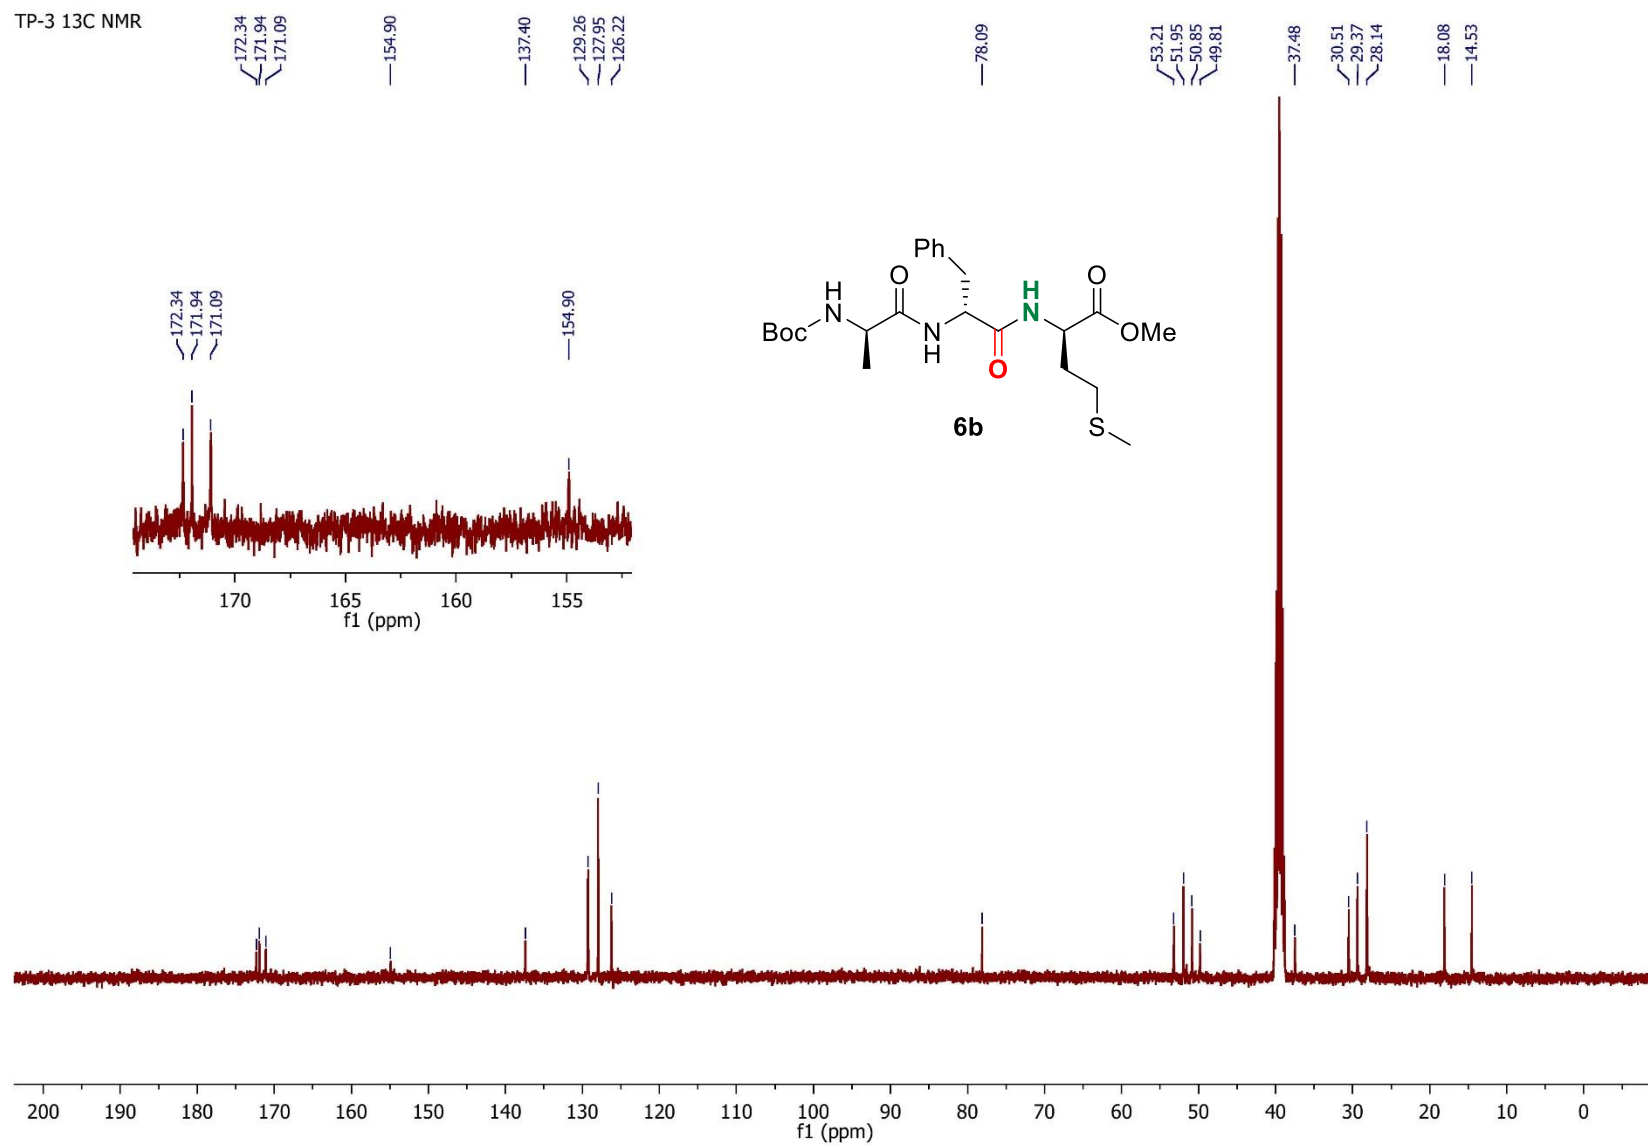

Figure S75. <sup>13</sup>C NMR Spectrum of **6b**(101MHz, DMSO-d<sub>6</sub>)

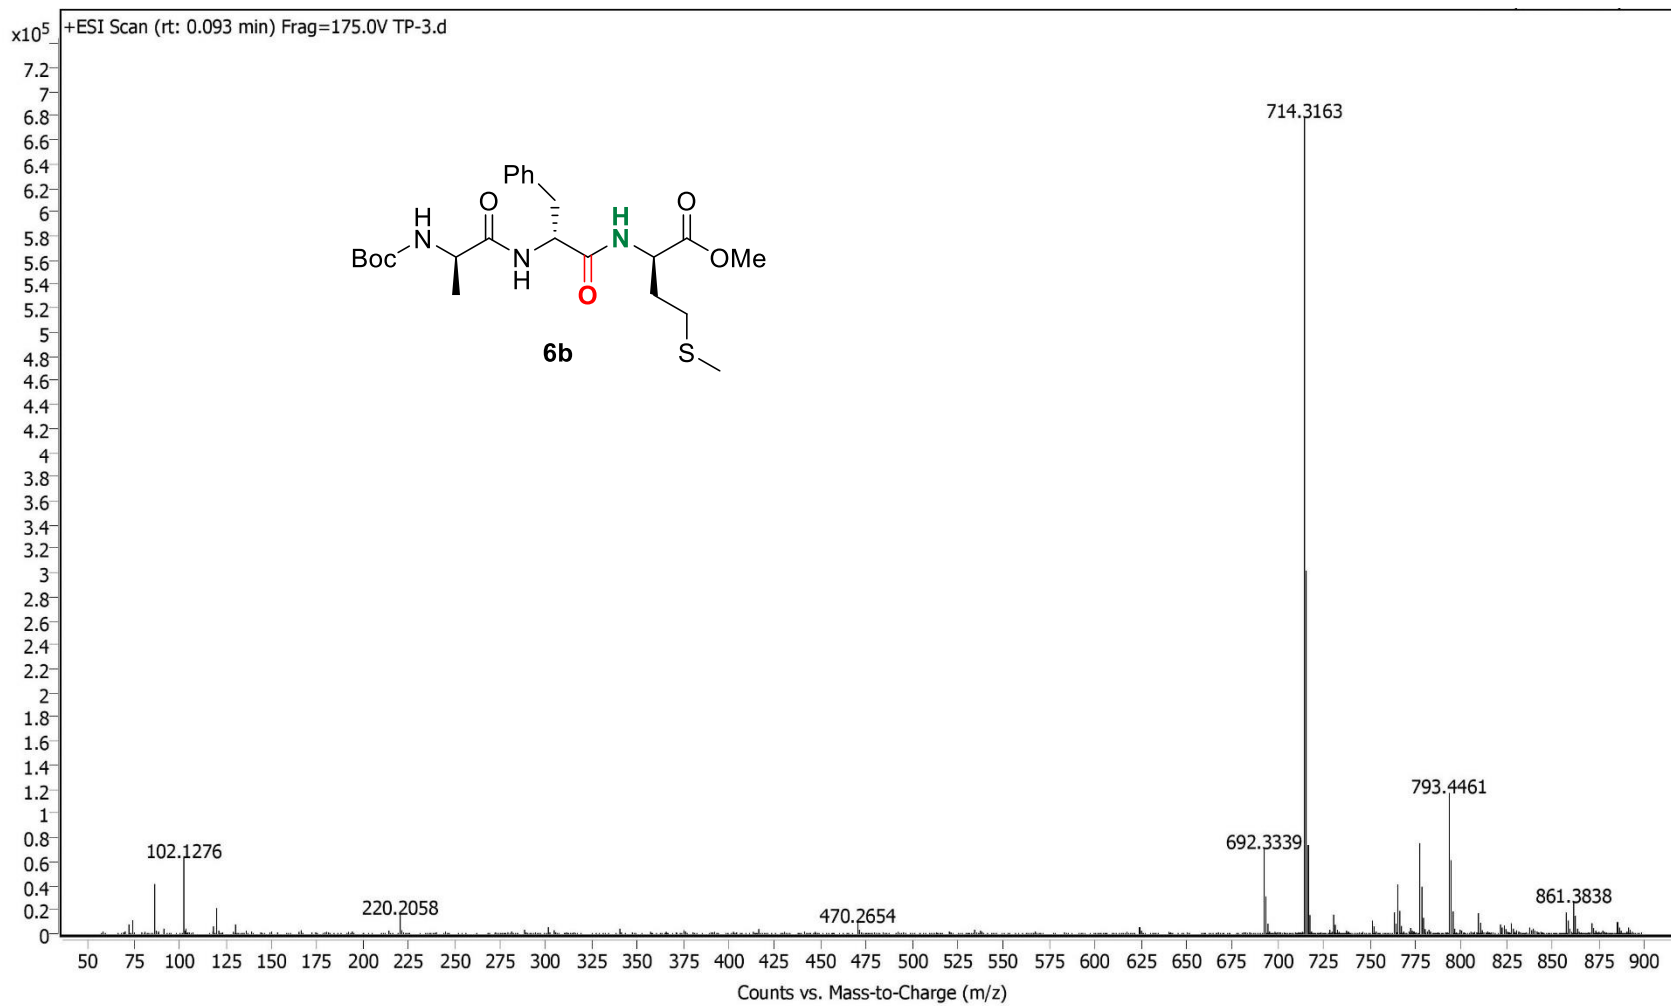

**Figure S76.** HRMS Spectrum of **6b**

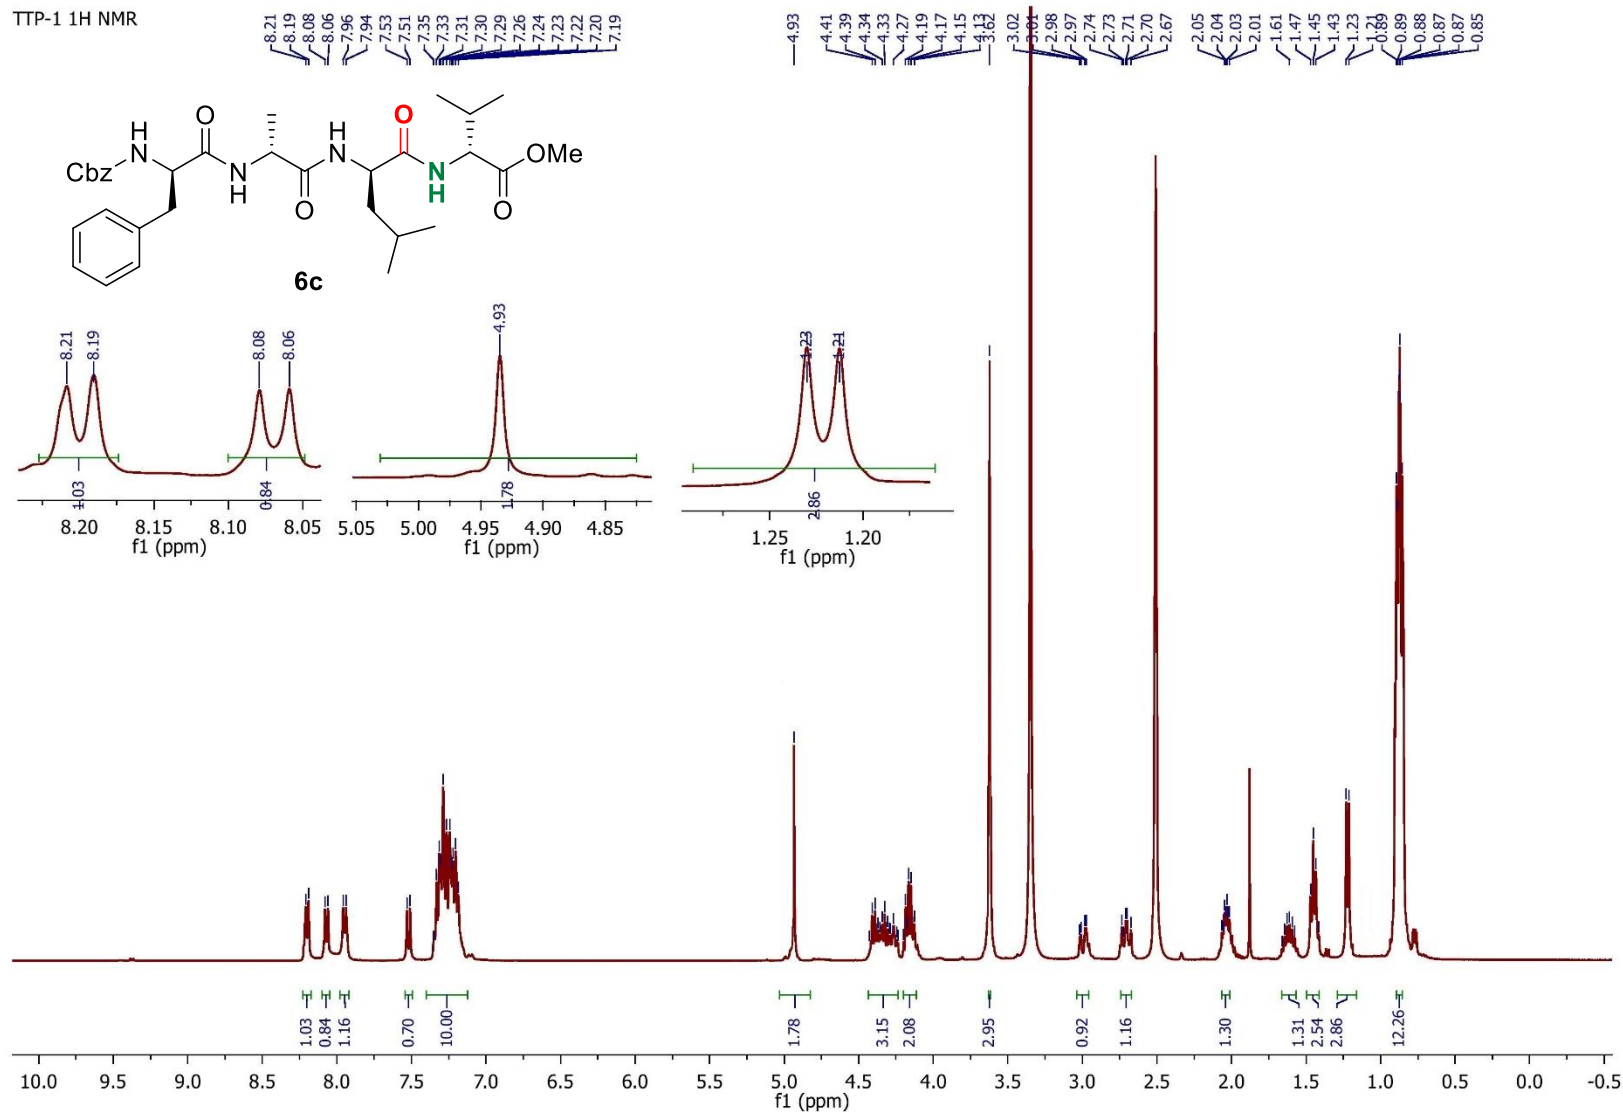

Figure S77. <sup>1</sup>H NMR Spectrum of **6c** (400MHz, DMSO-d<sub>6</sub>)

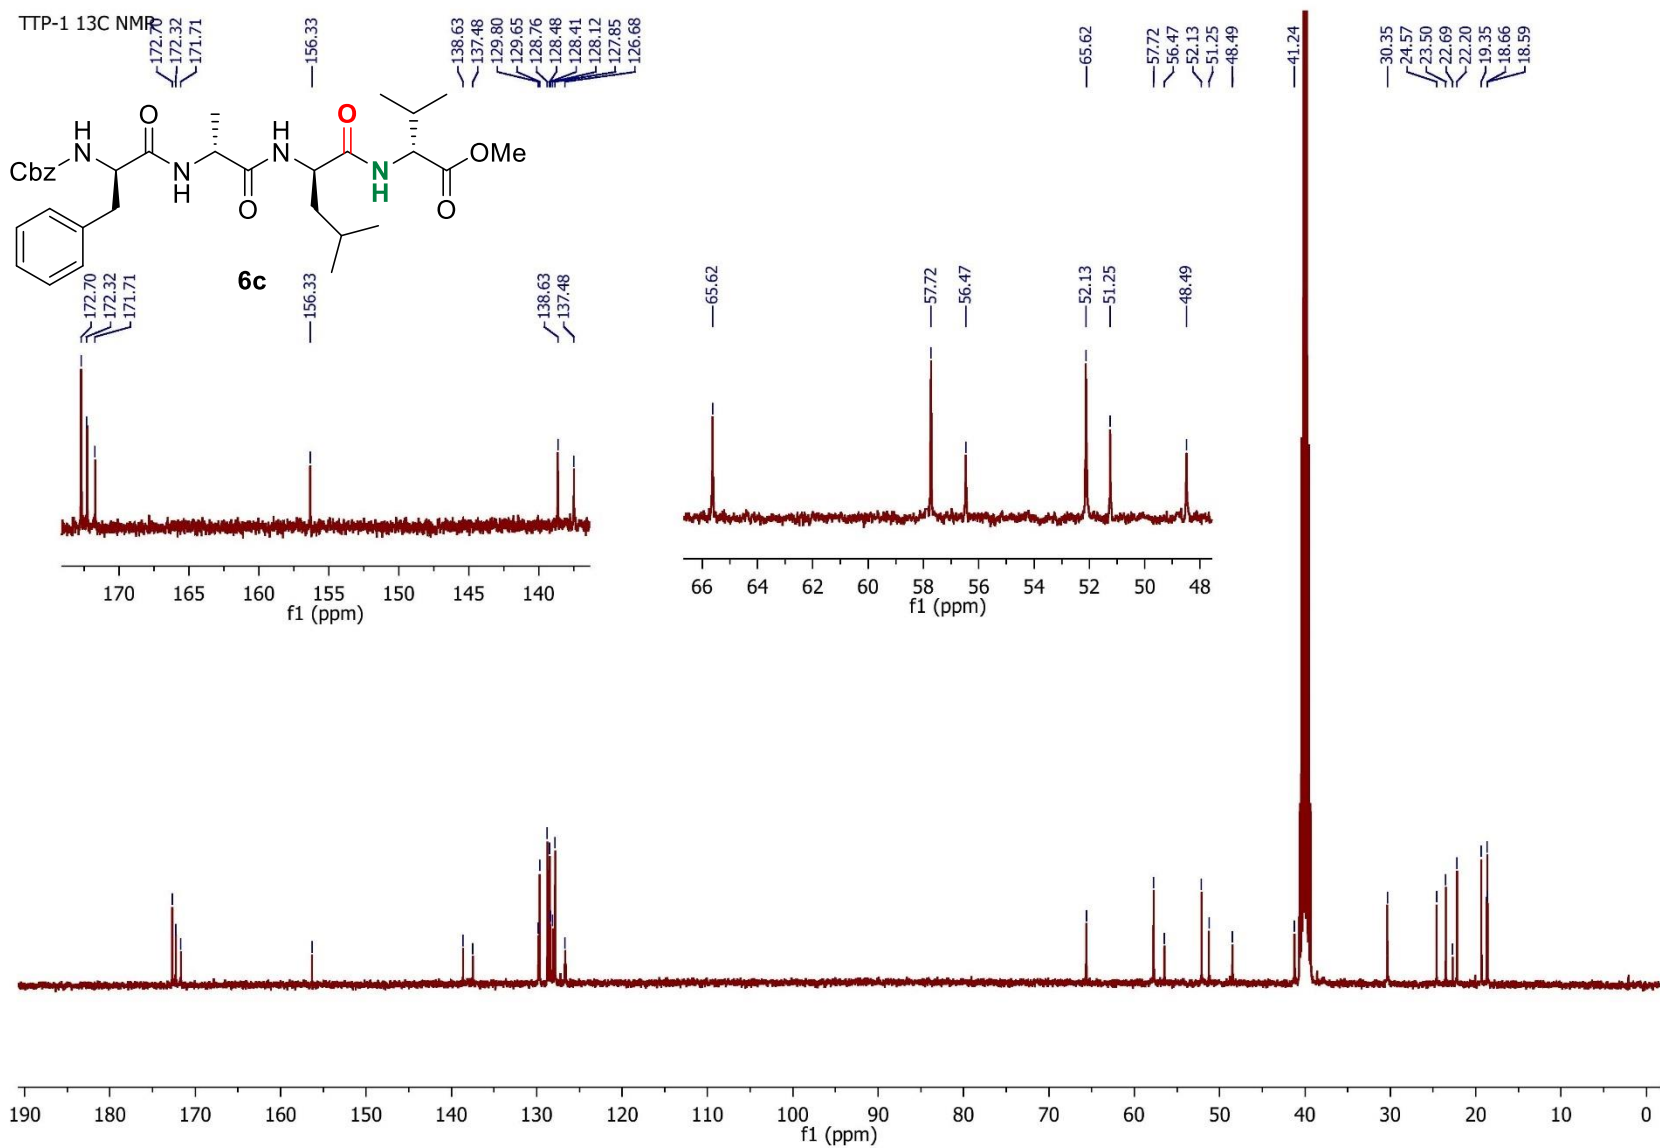

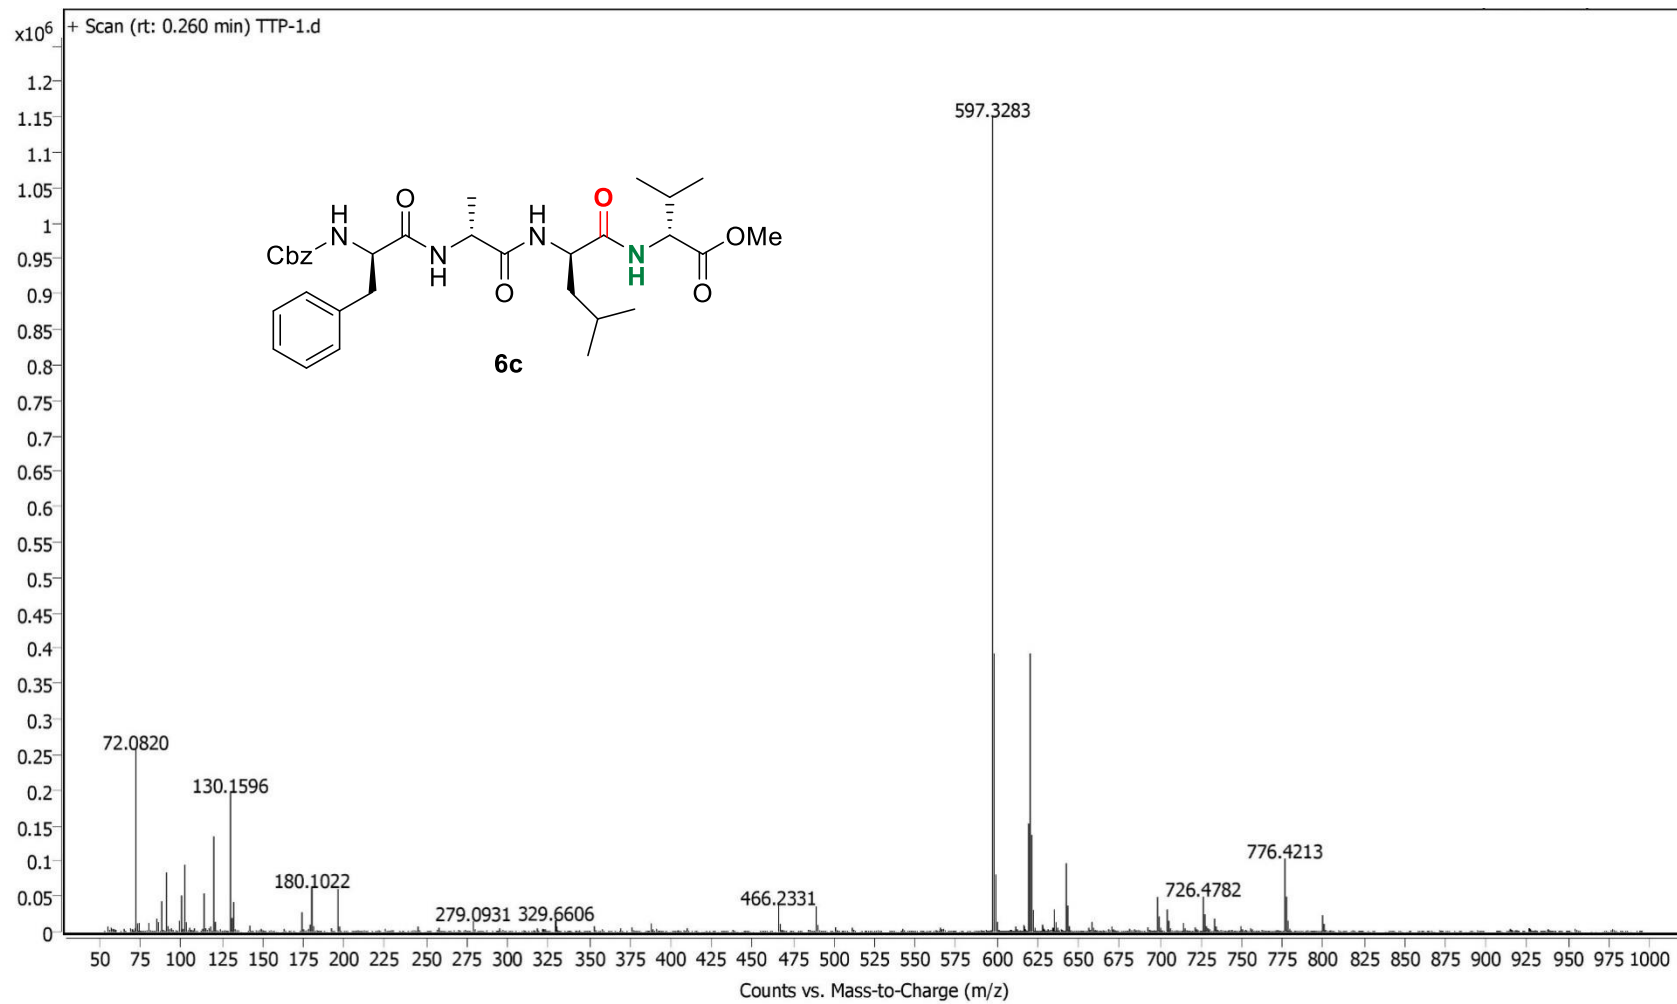

**Figure S79.** HRMS Spectrum of **6c**

TTP-2 1H NMR

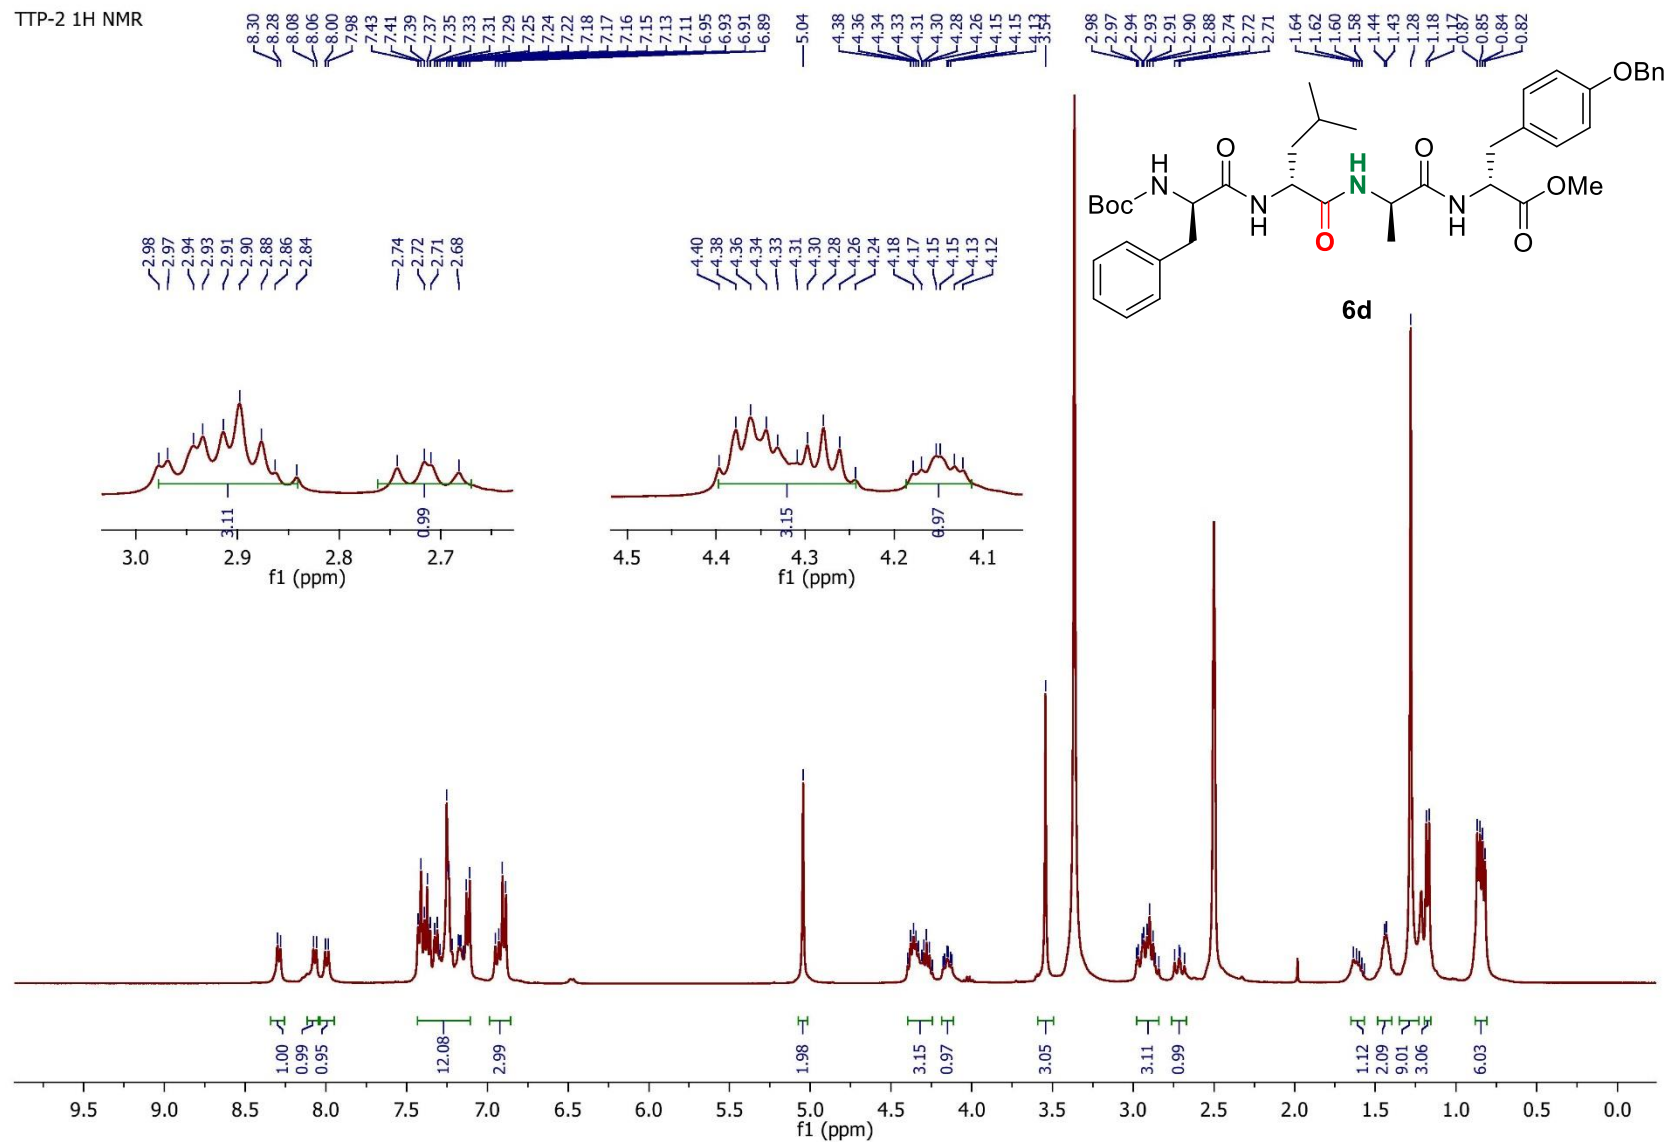

Figure S80. <sup>1</sup>H NMR Spectrum of **6d** (400MHz, DMSO-d<sub>6</sub>)

TTP-2 13C NMR

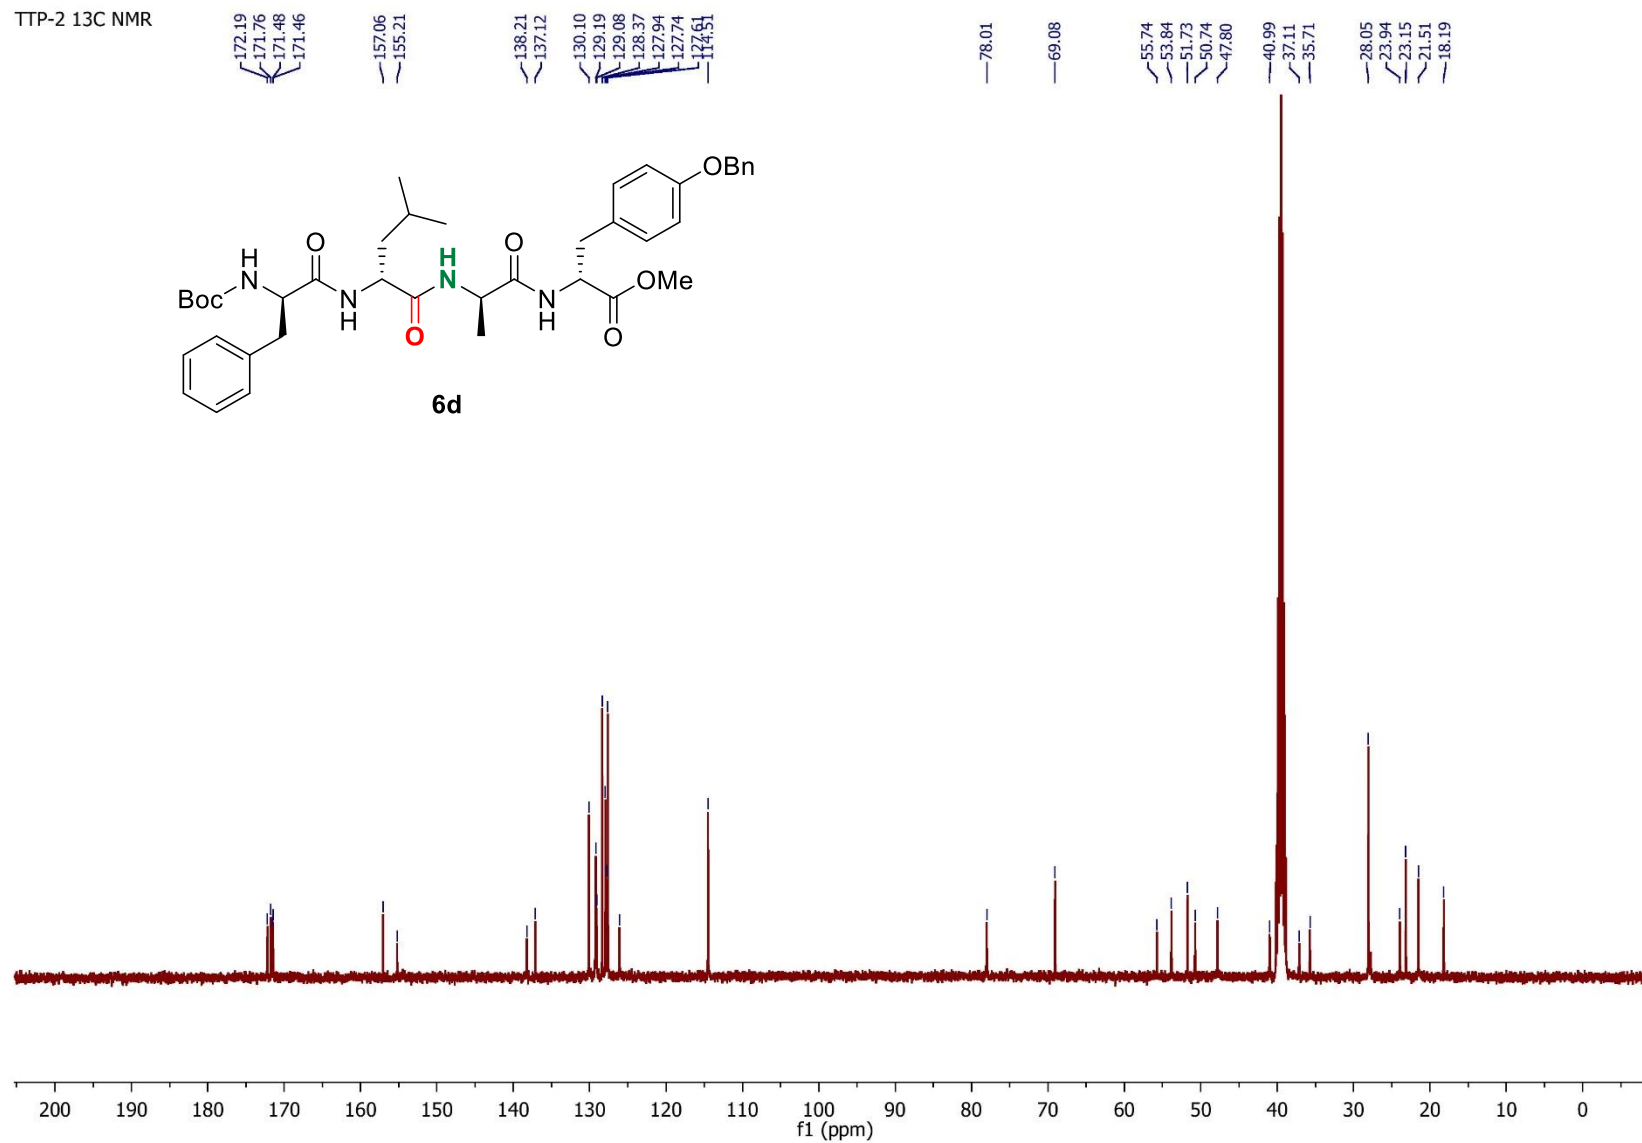

**Figure S81.**  $^{13}\text{C}$  NMR Spectrum of **6d** (101MHz, DMSO- $d_6$ )



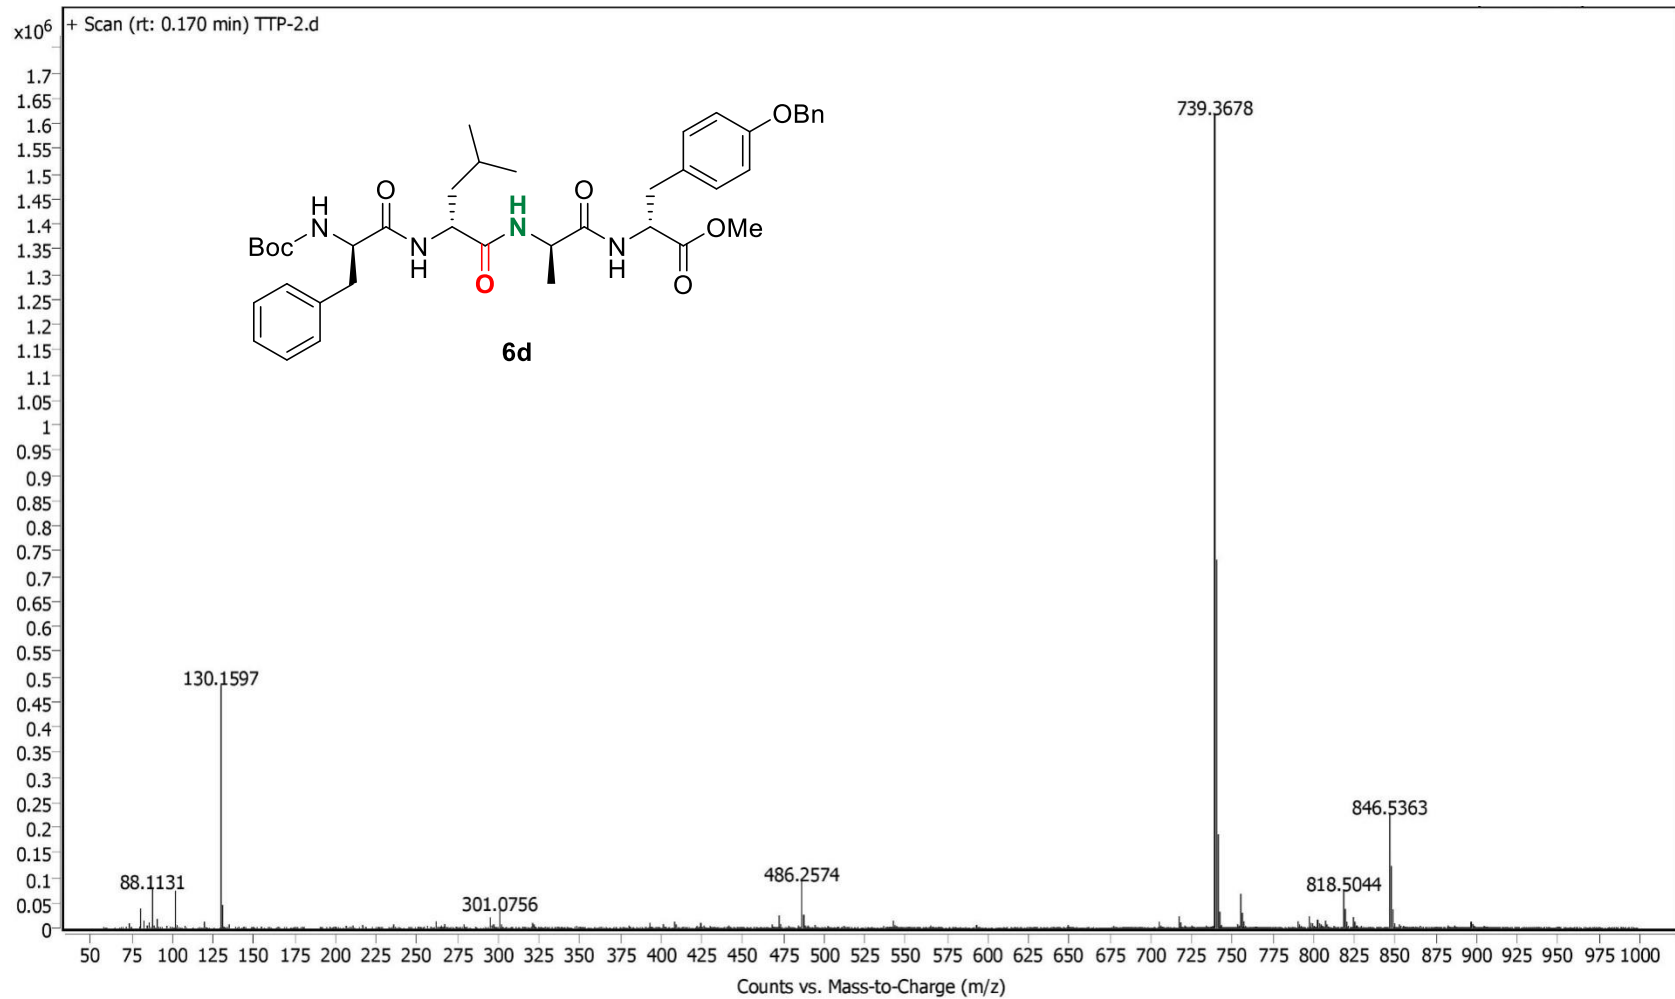

**Figure S82.** HRMS Spectrum of **6d**

OC-5 1H NMR

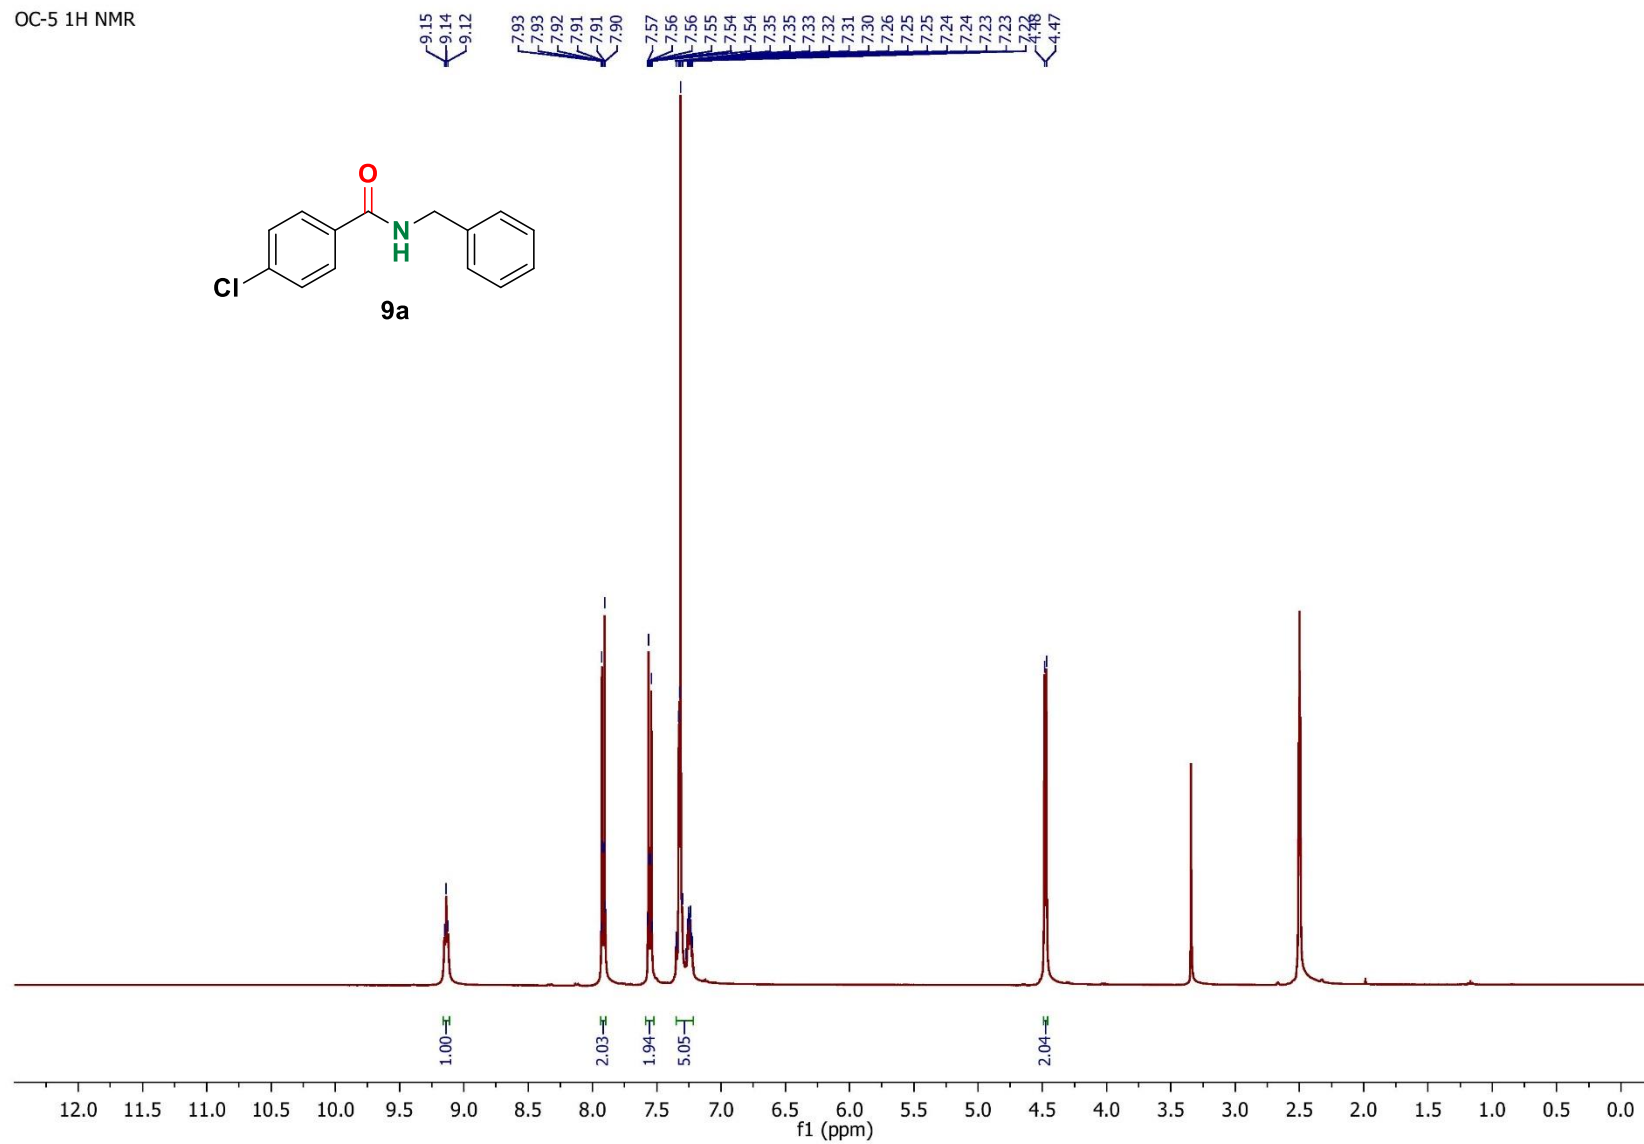

Figure S83. <sup>1</sup>H NMR Spectrum of 9a (400MHz, DMSO-d<sub>6</sub>)

OC-5 13C NMR

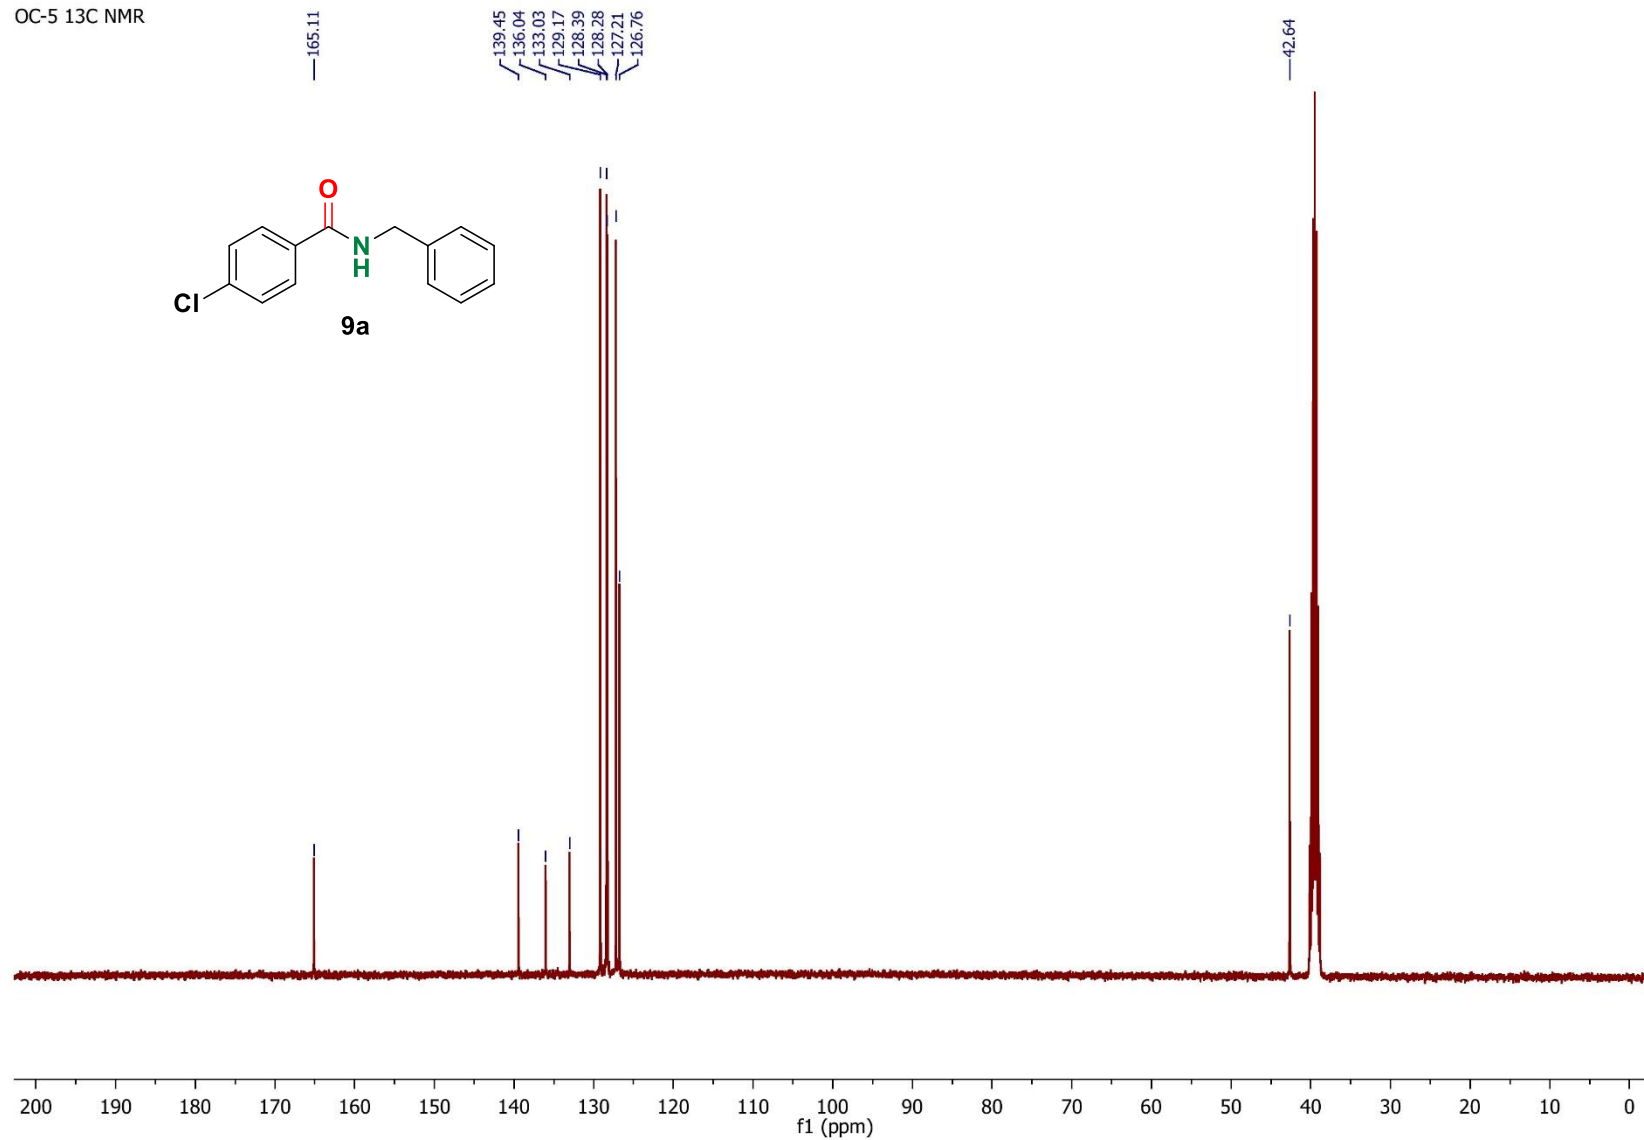

Figure S84. <sup>13</sup>C NMR Spectrum of **9a** (101MHz, DMSO-d<sub>6</sub>)

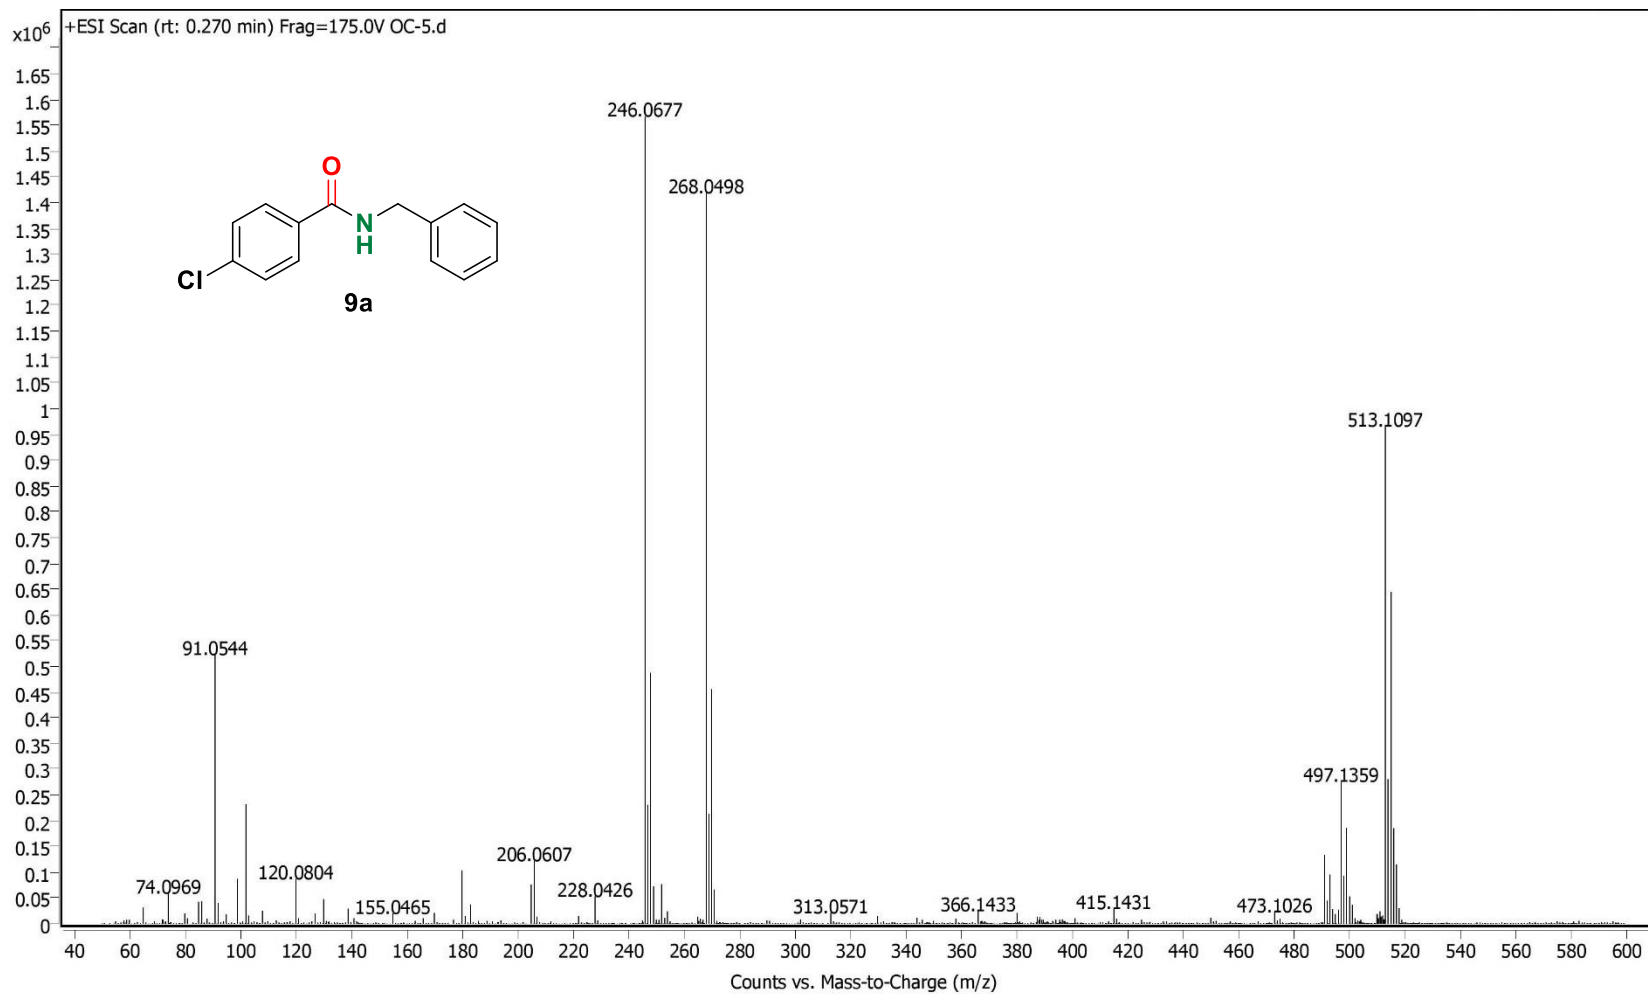

**Figure S85.** HRMS Spectrum of **9a**

OC-6 1H NMR

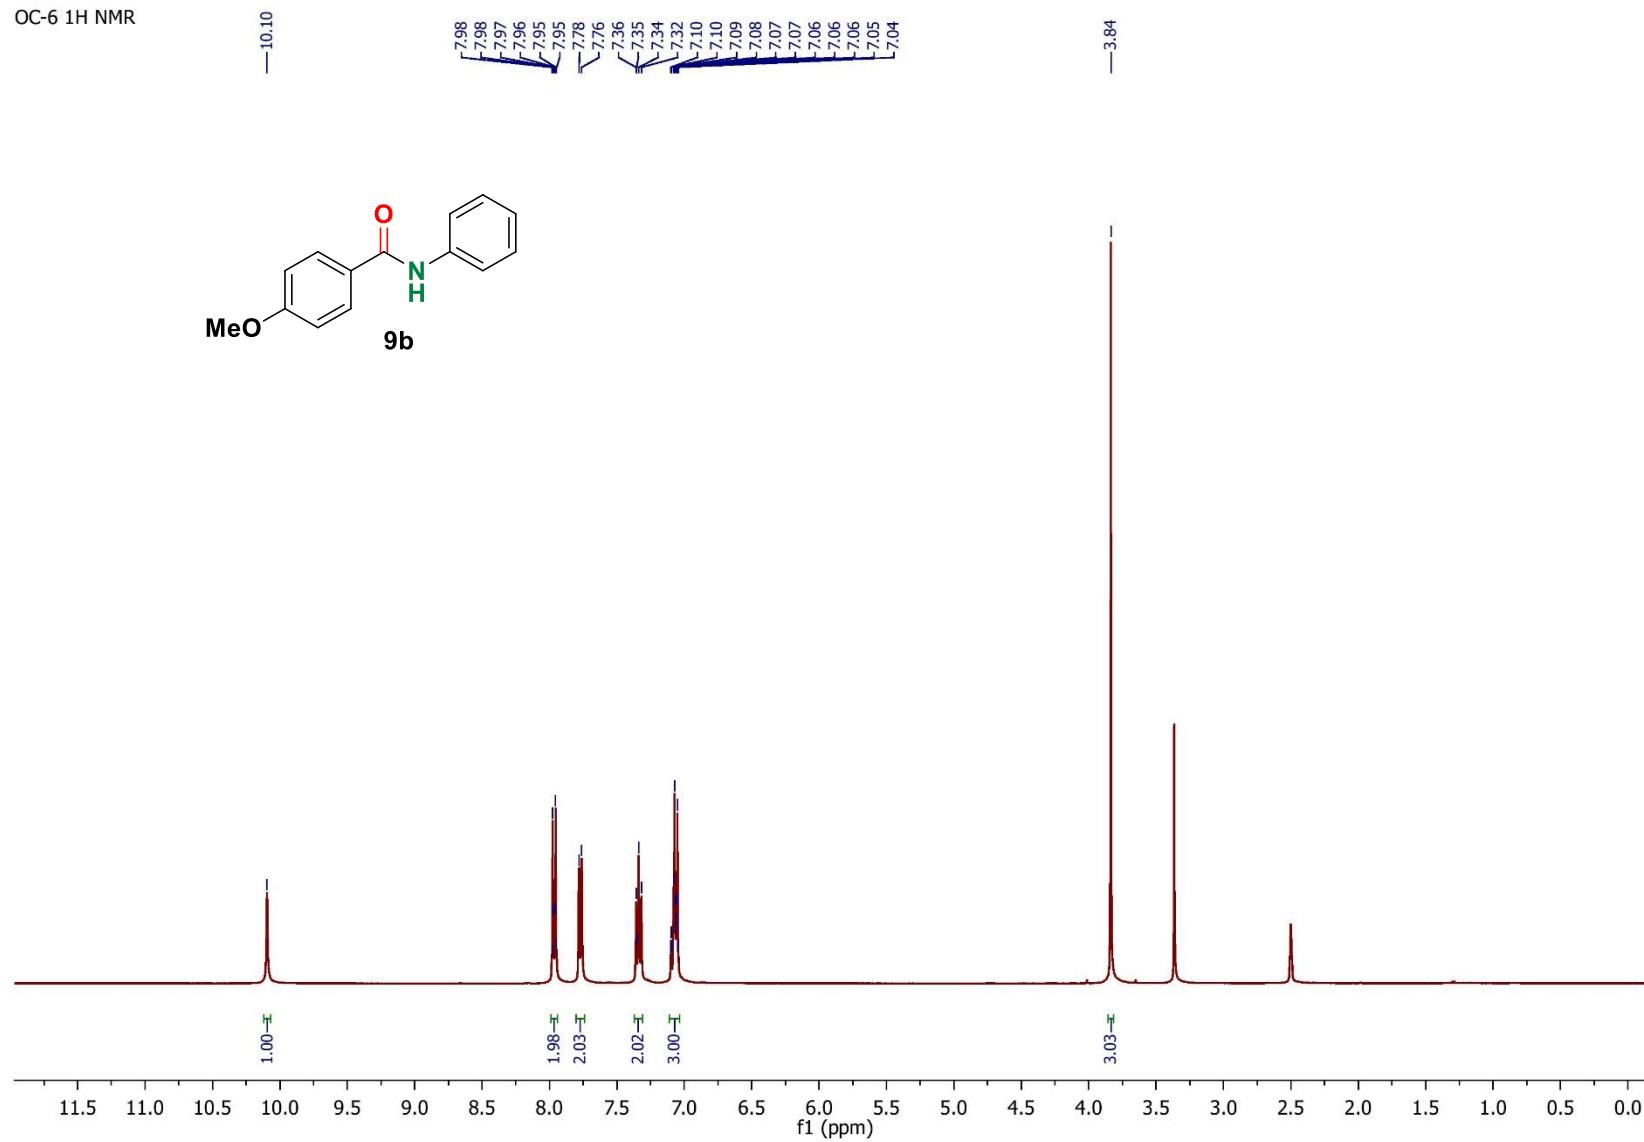

Figure S86. <sup>1</sup>H NMR Spectrum of **9b** (400MHz, DMSO-d<sub>6</sub>)

OC-6 13C NMR

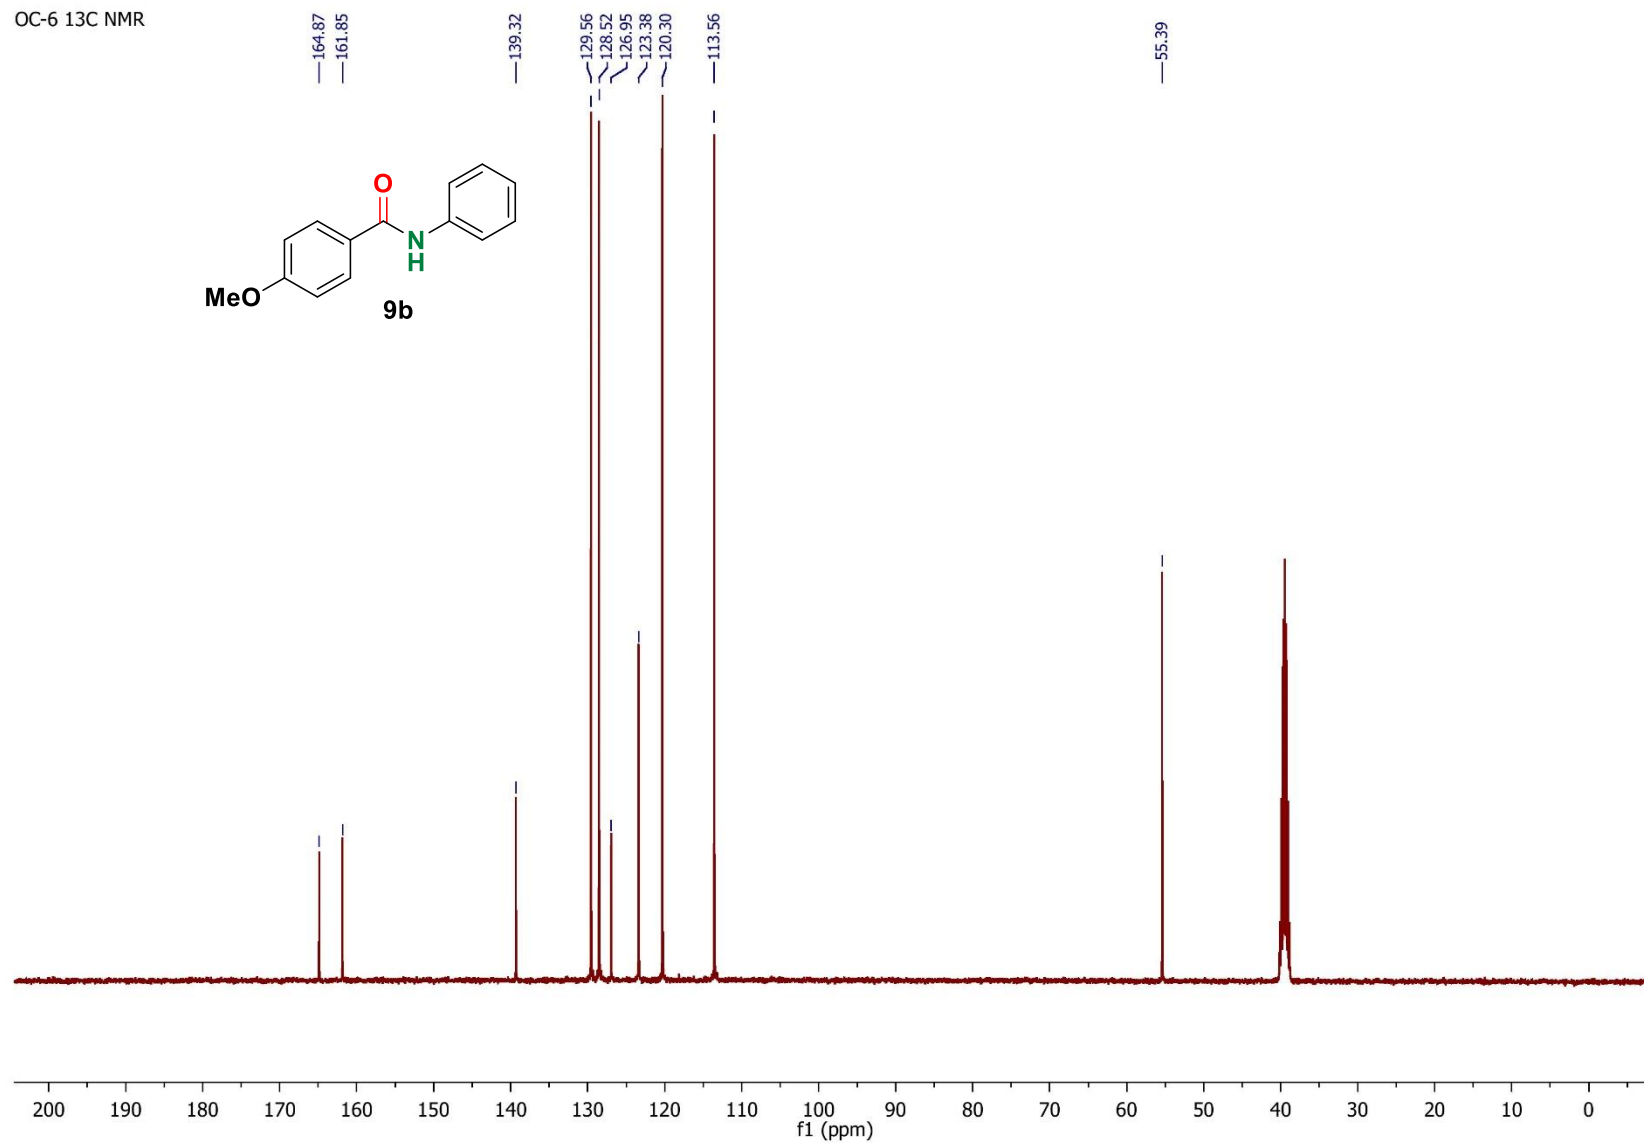

Figure S87. <sup>13</sup>C NMR Spectrum of **9b** (101MHz, DMSO-d<sub>6</sub>)

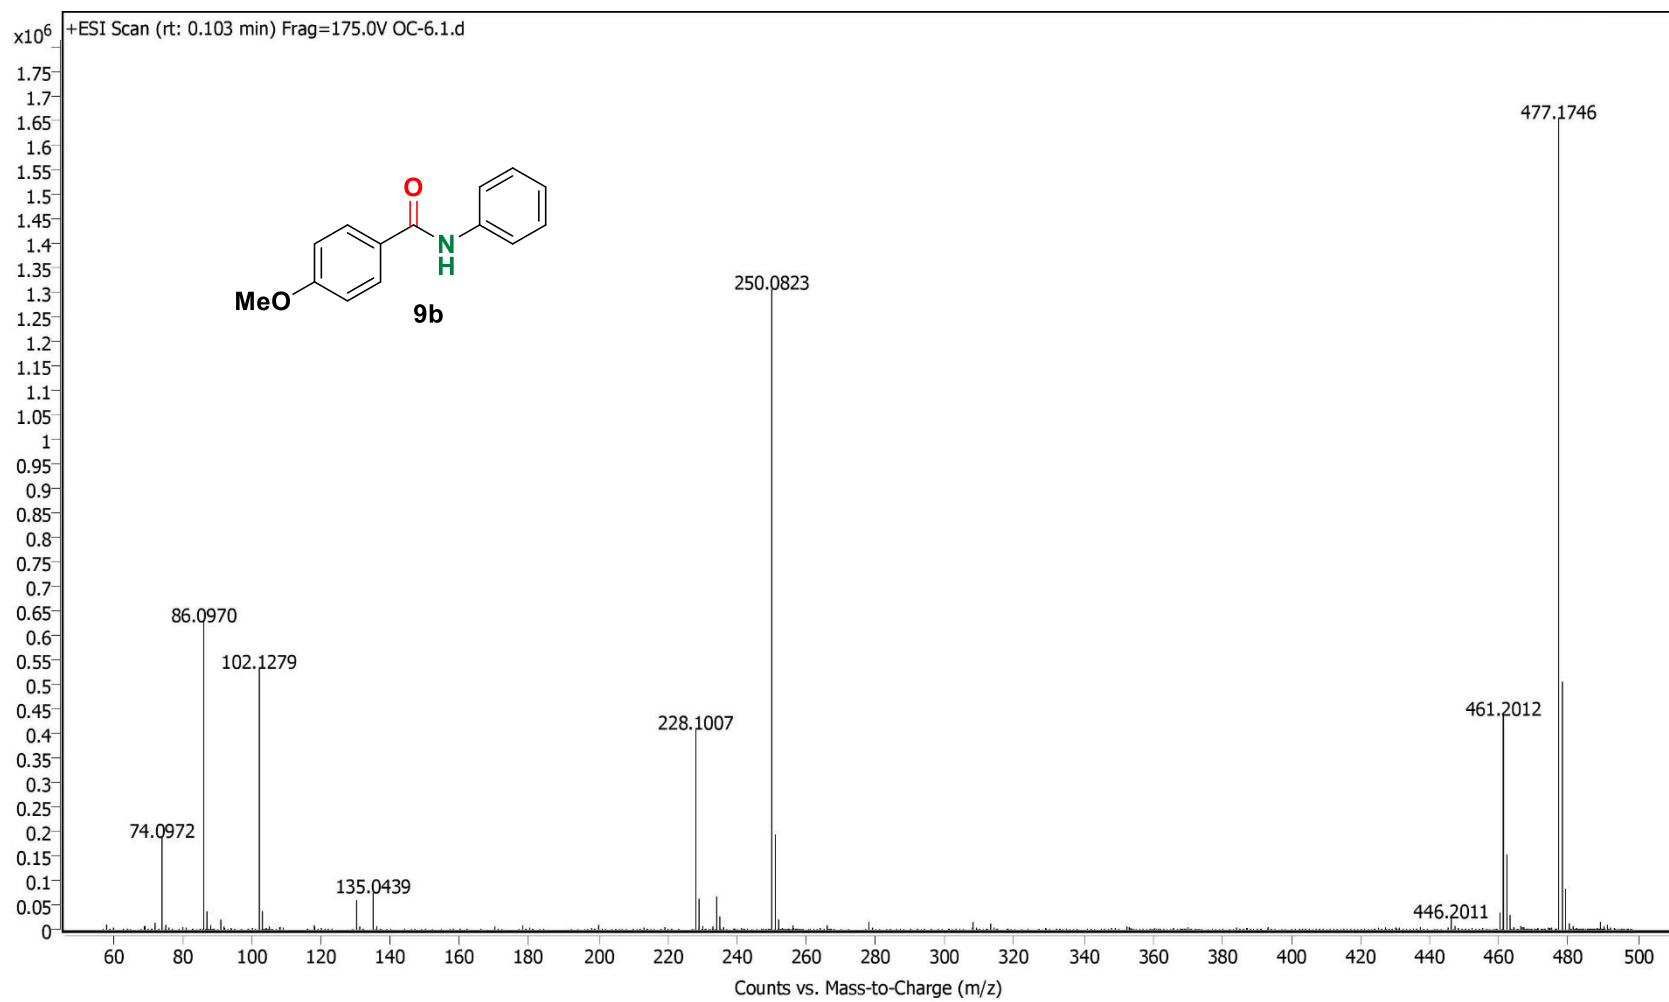

**Figure S88.** HRMS Spectrum of **9b**

OC-7 1H NMR

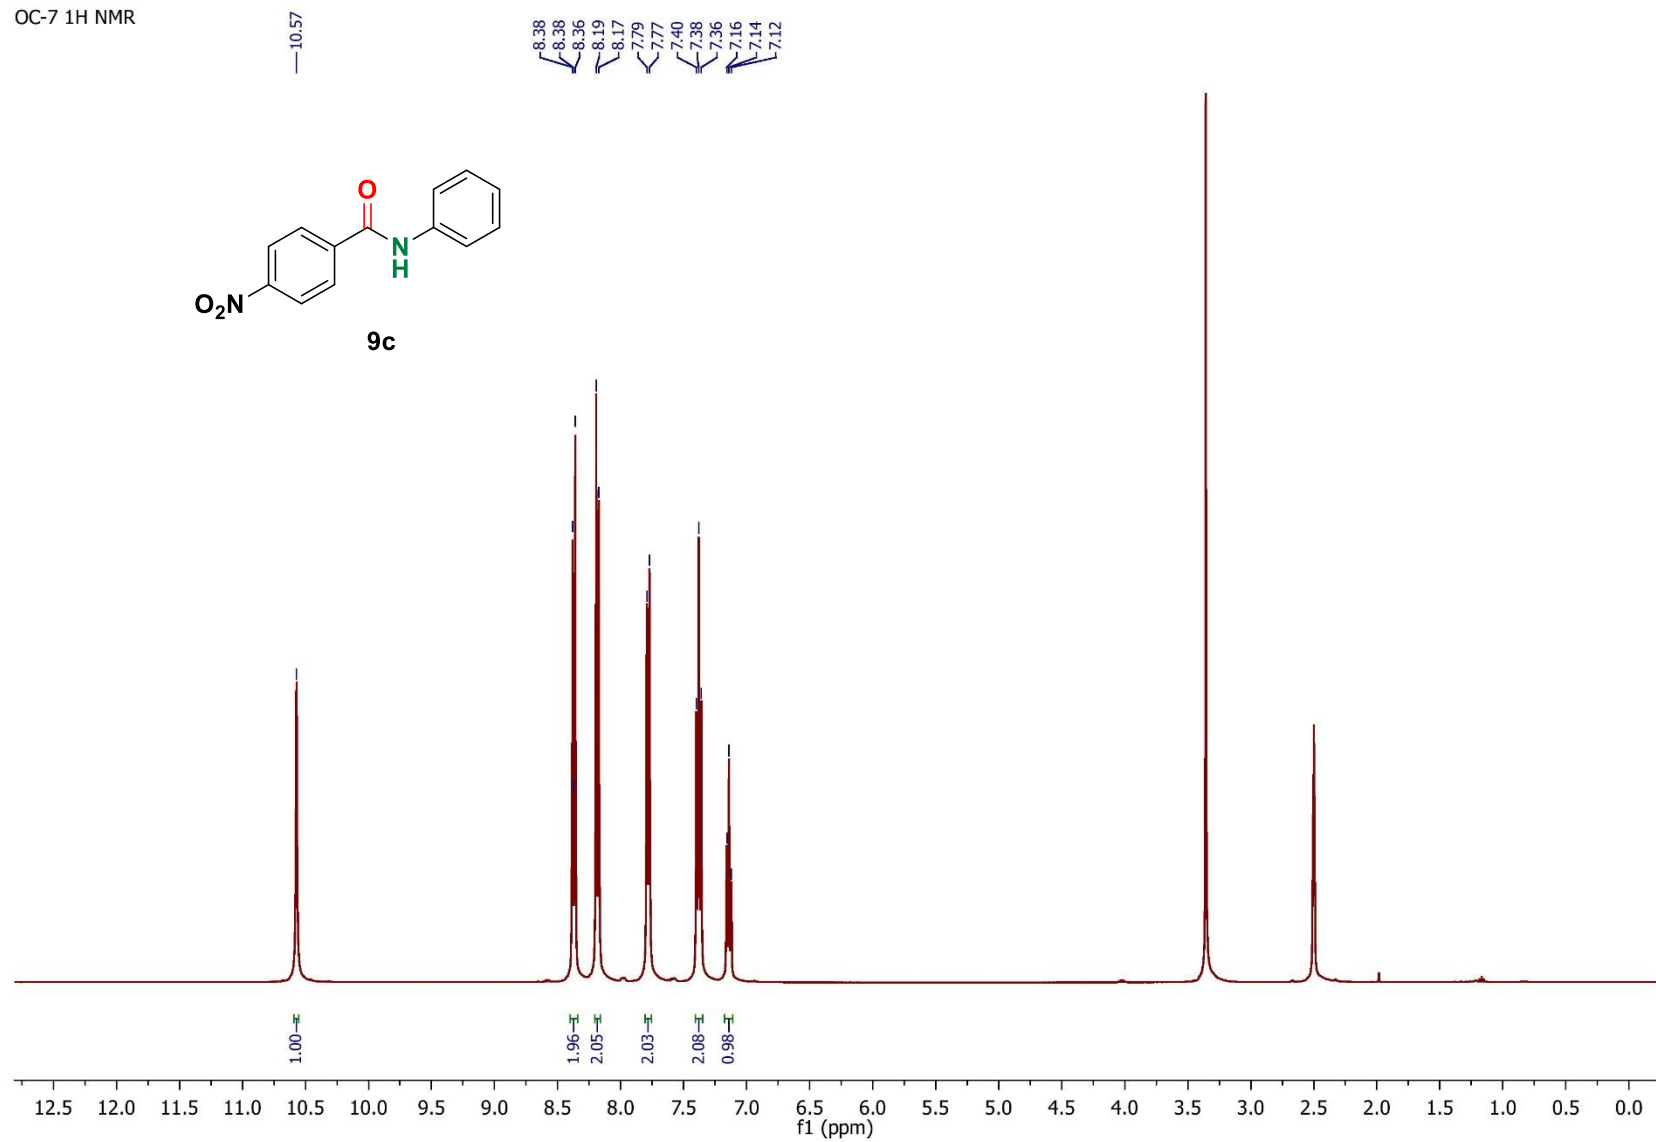

**Figure S89.** <sup>1</sup>H NMR Spectrum of **9c** (400MHz, DMSO-d<sub>6</sub>)



OC-7 13C NMR

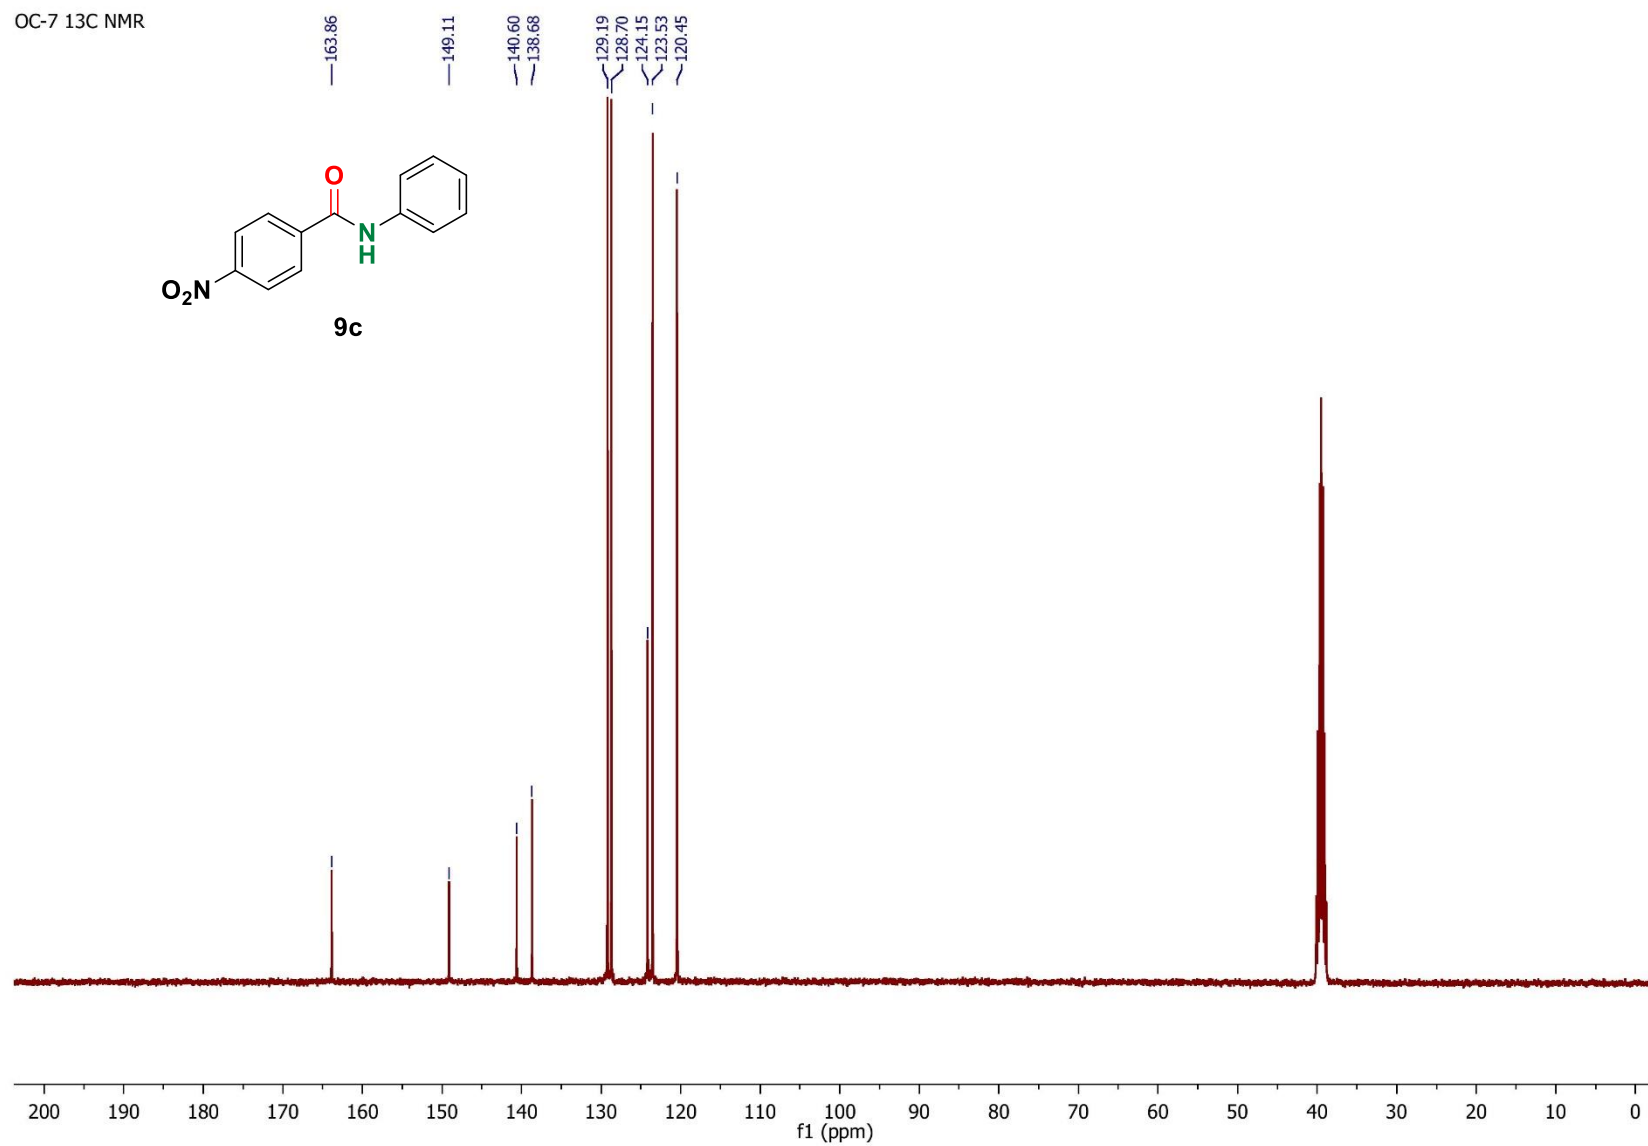

**Figure S90.** <sup>13</sup>C NMR Spectrum of 9c (101MHz, DMSO-d<sub>6</sub>)

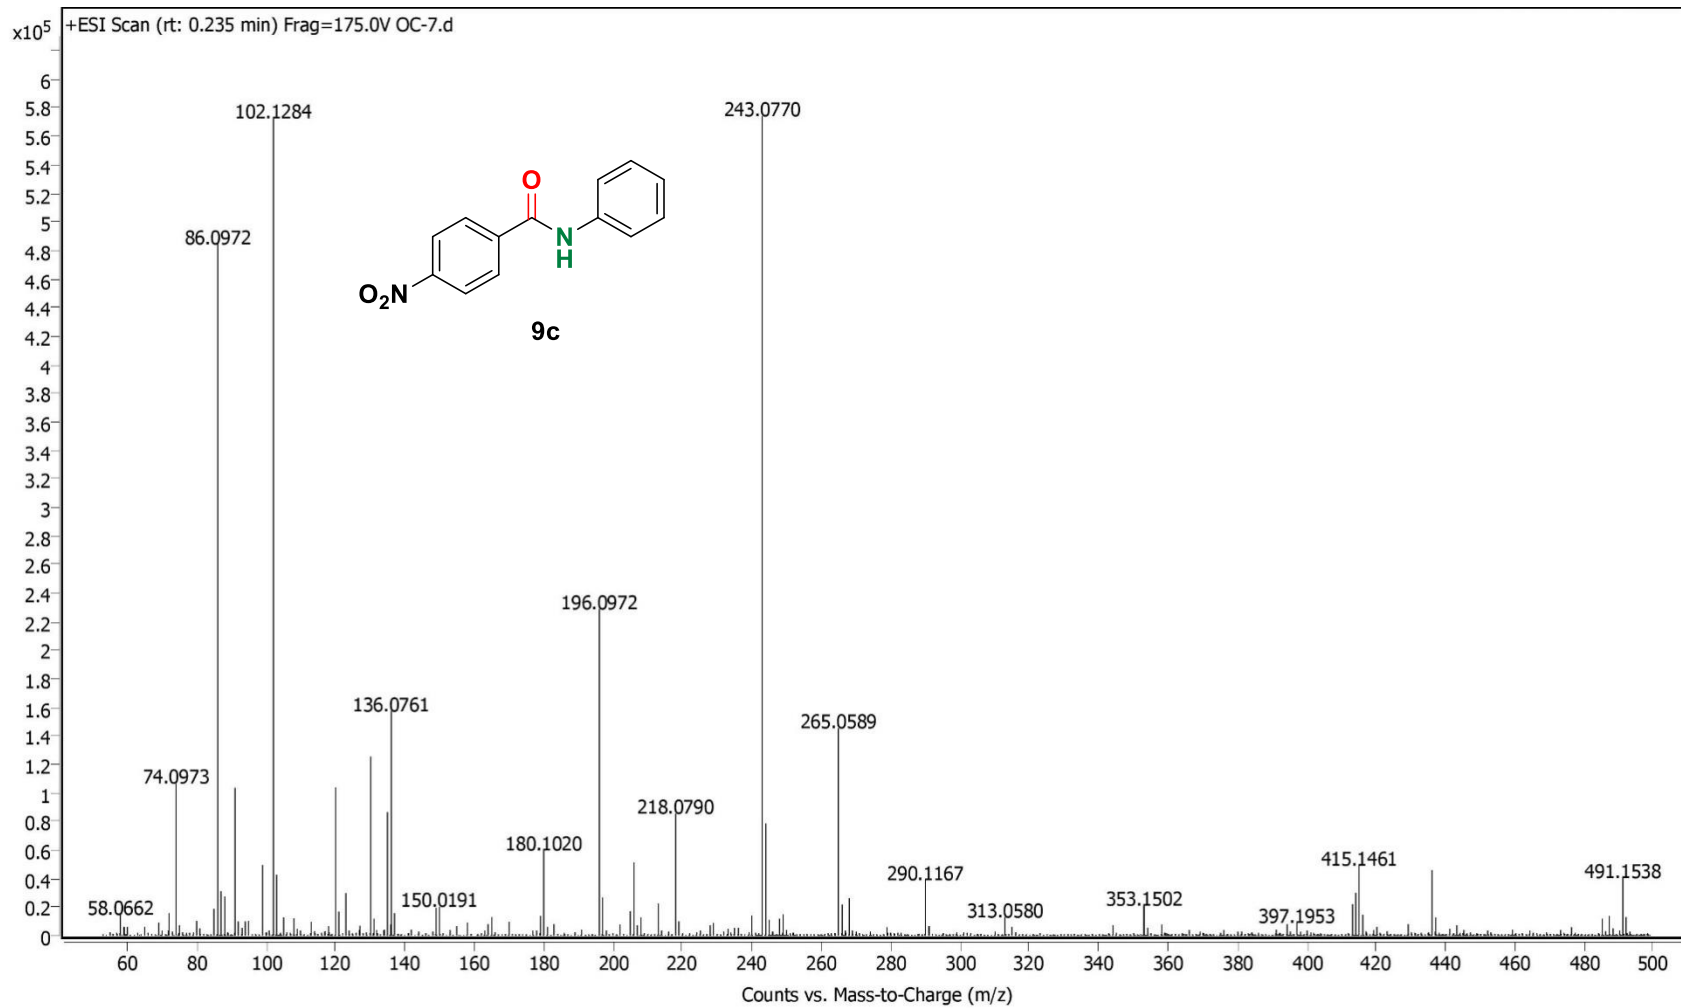

Figure S91. HRMS Spectrum of 9c

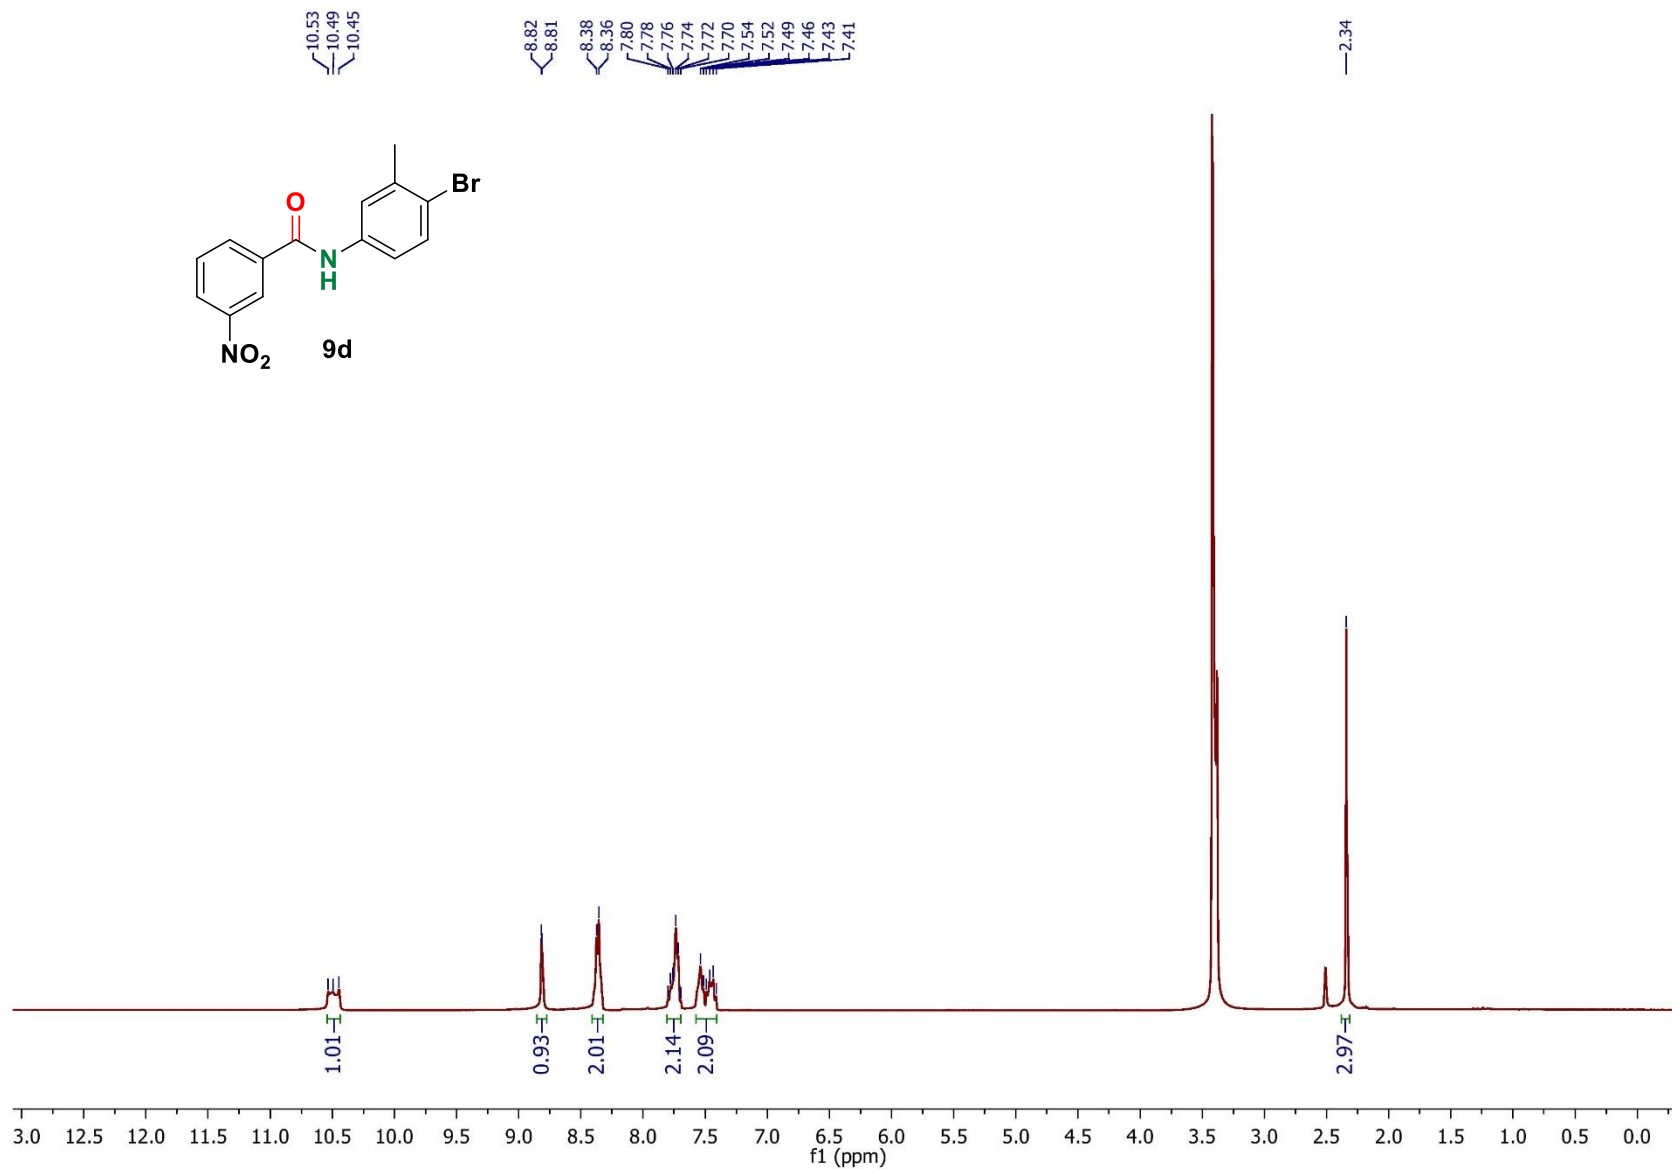

**Figure S92.** <sup>1</sup>H NMR Spectrum of **9d** (400MHz, DMSO-d<sub>6</sub>)

OC-1 13C NMR

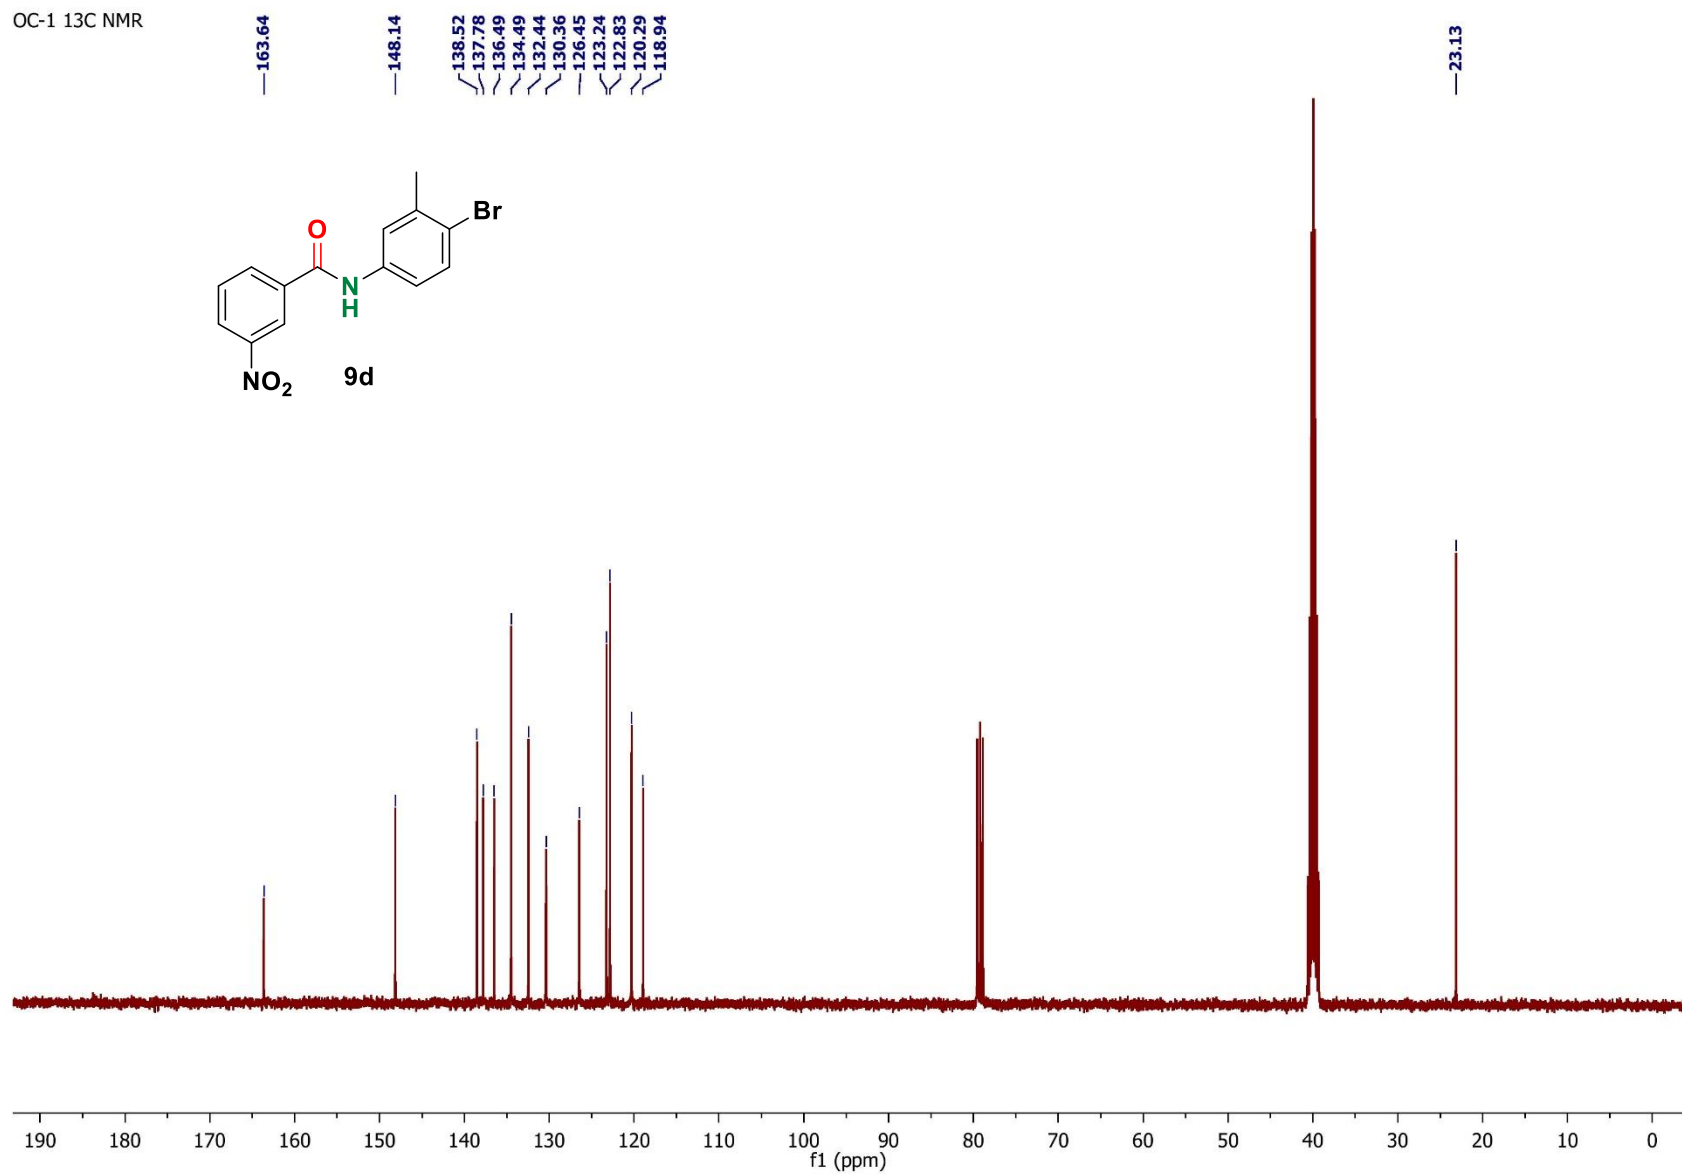

Figure S93.  $^{13}\text{C}$  NMR Spectrum of 9d (101MHz, DMSO- $d_6$ )

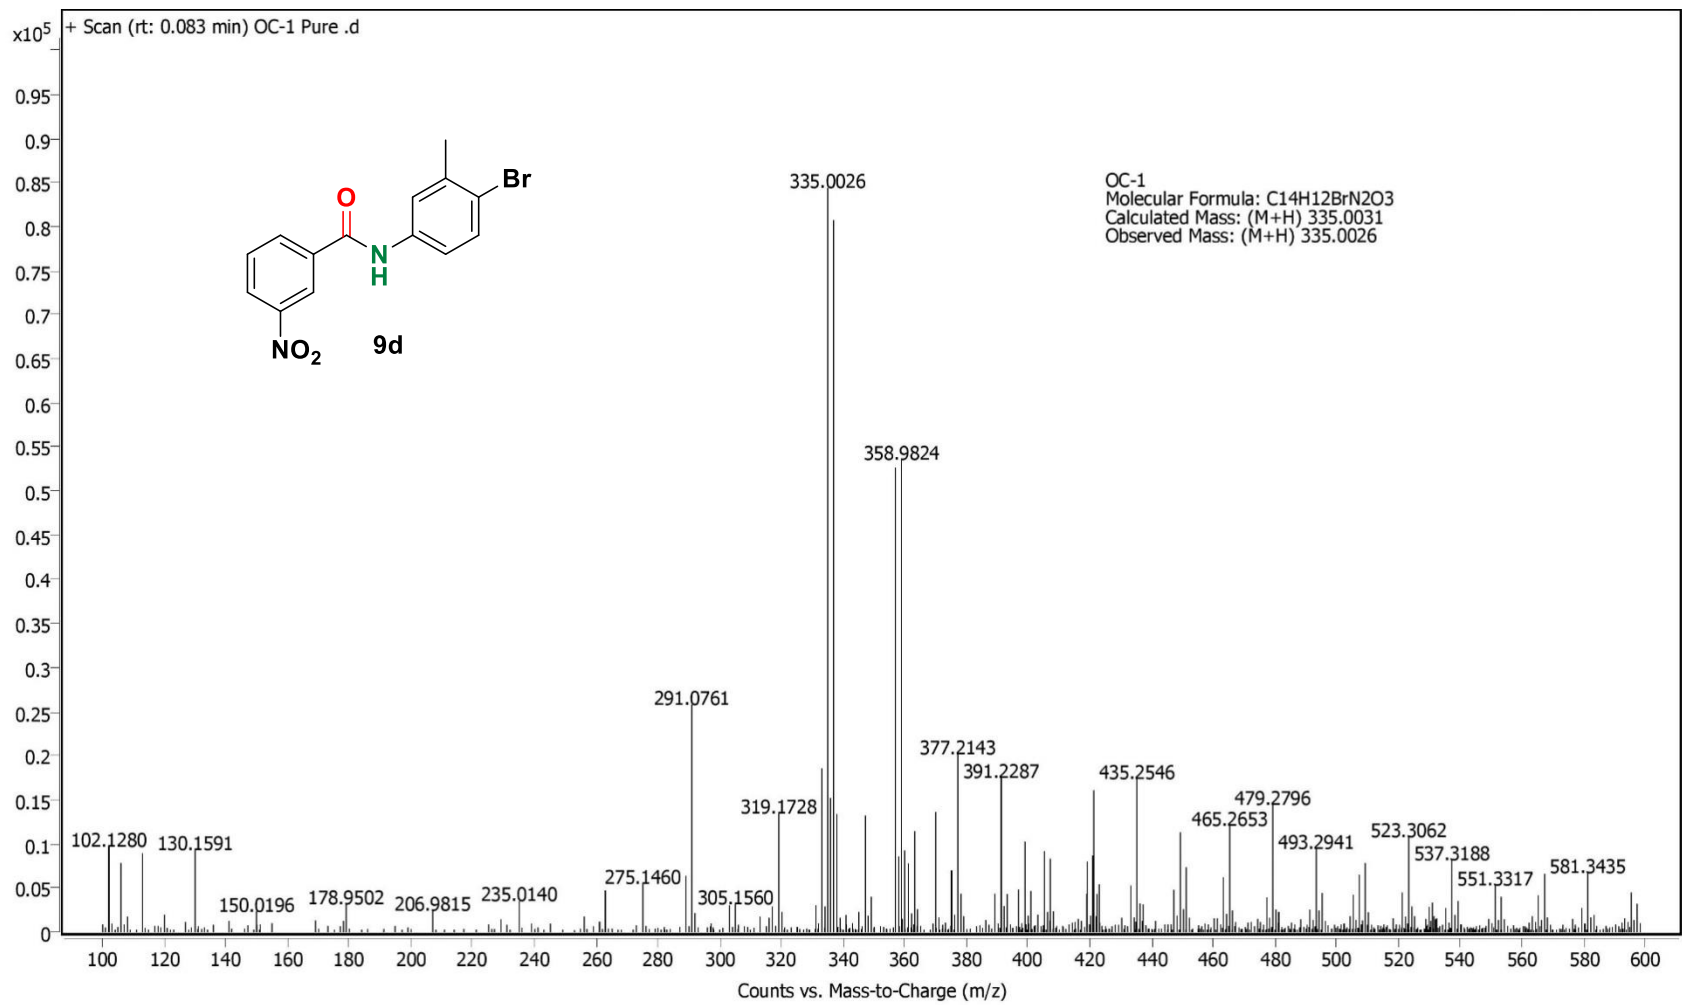

**Figure S94.** HRMS Spectrum of **9d**

OC-2 1H NMR

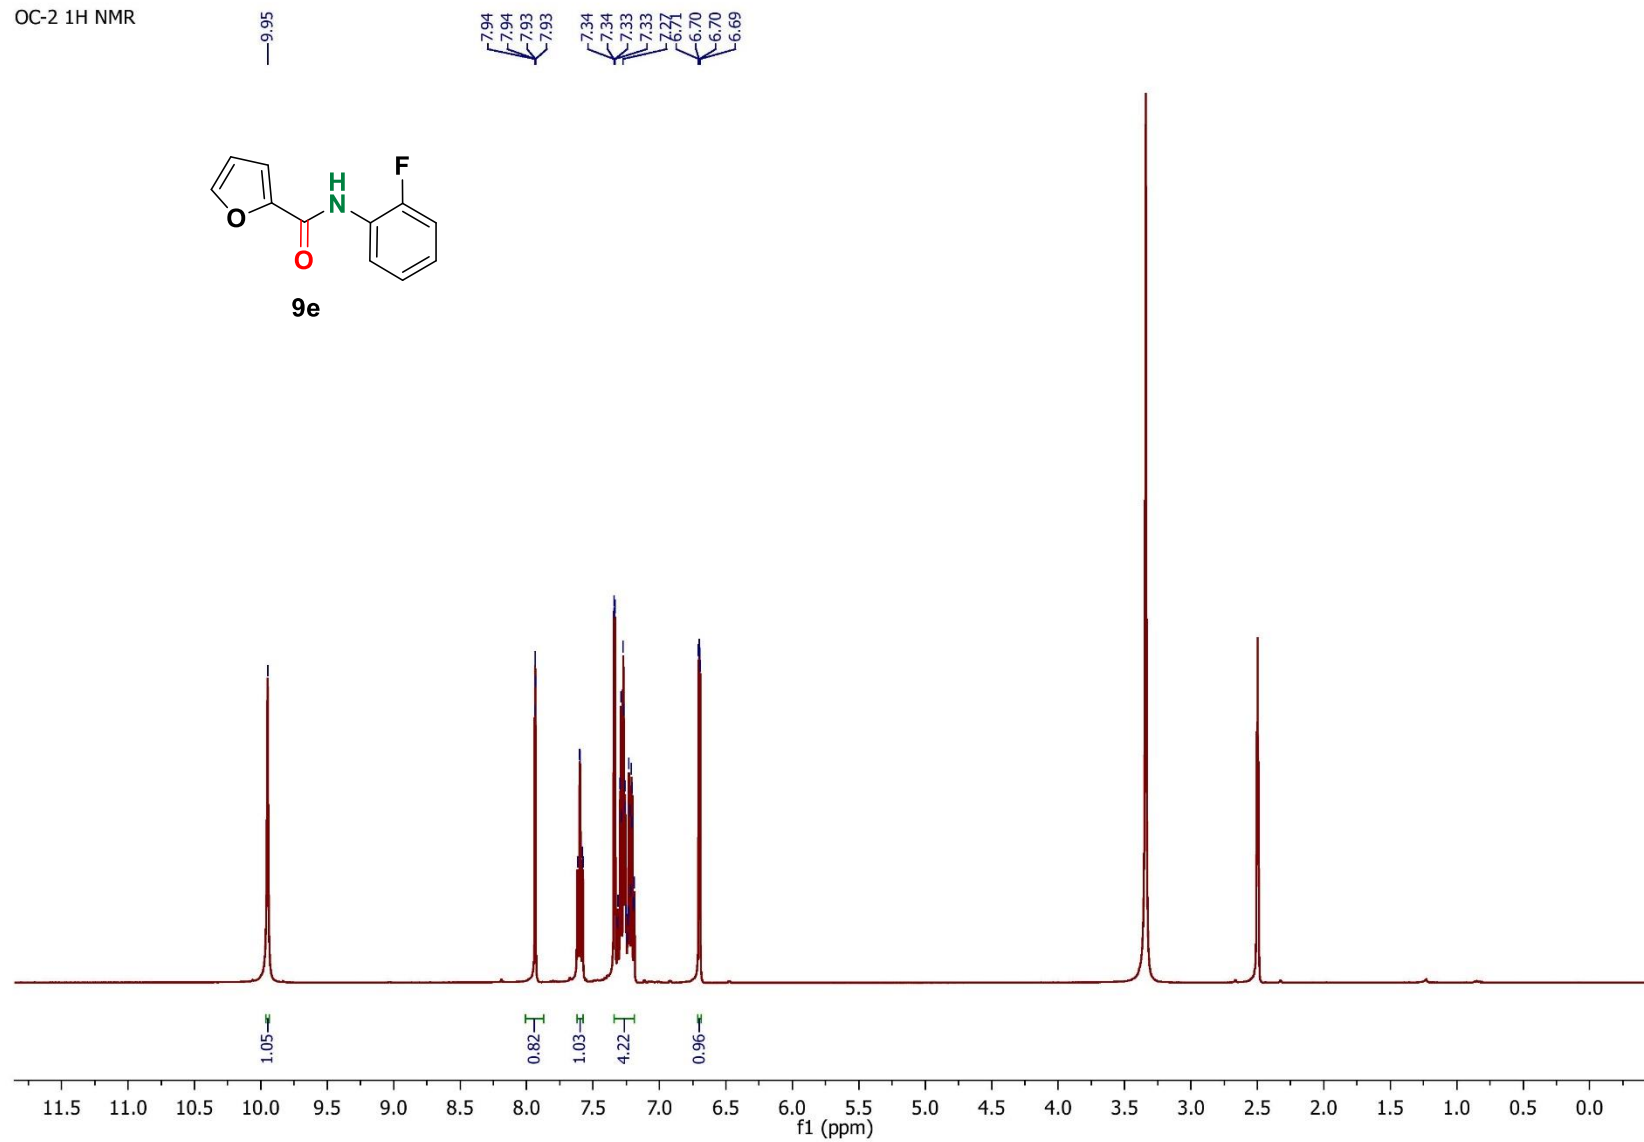

Figure S95. <sup>1</sup>H NMR Spectrum of 9e (400MHz, DMSO-d<sub>6</sub>)

OC-2 13C NMR

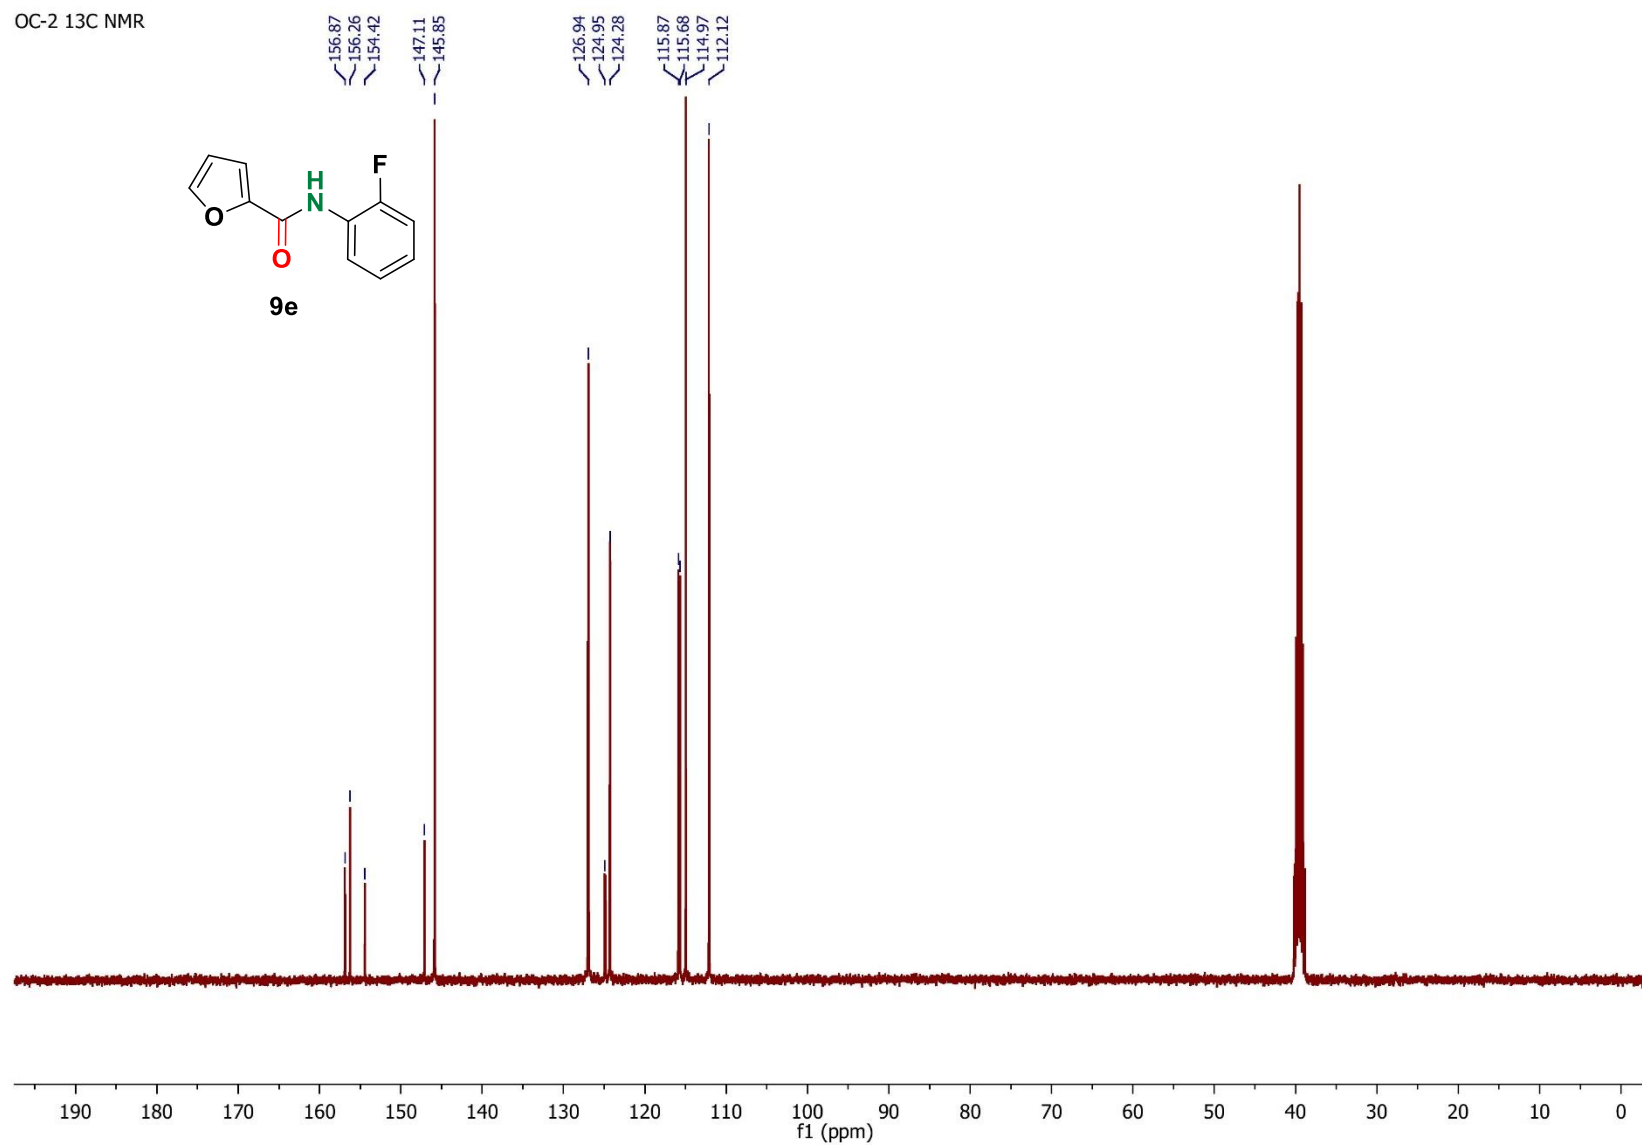

Figure S96.  $^{13}\text{C}$  NMR Spectrum of **9e** (101MHz, DMSO- $d_6$ )

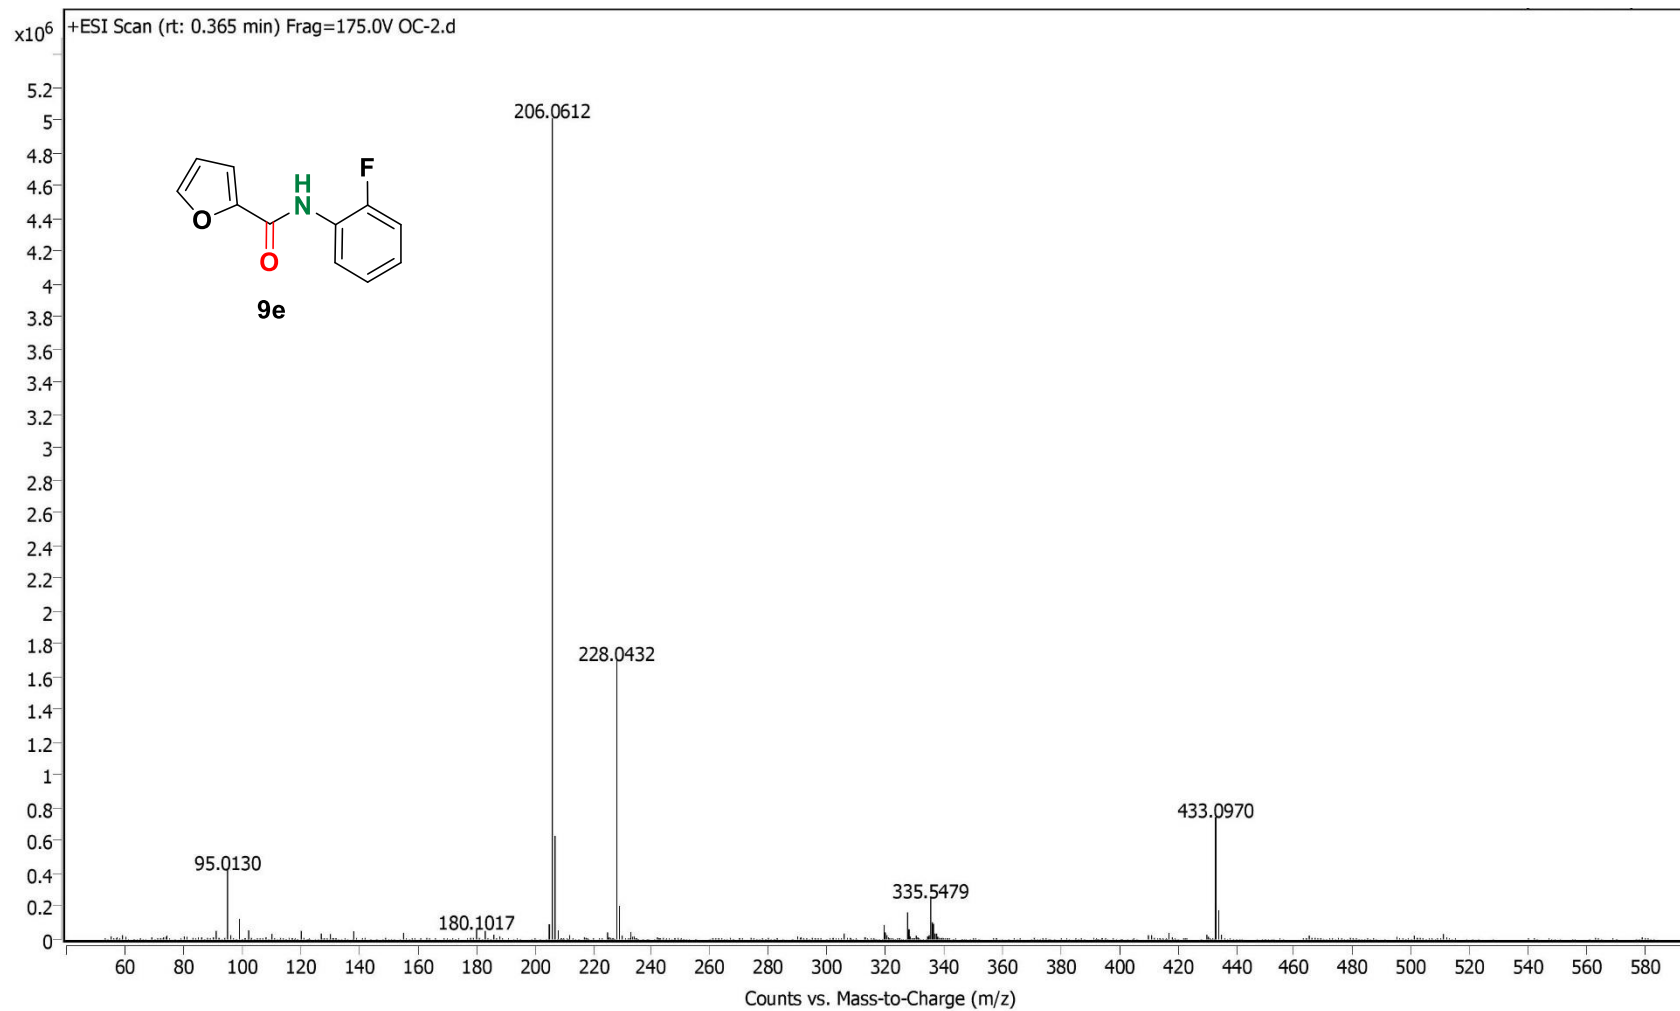

**Figure S97.** HRMS Spectrum of **9e**



OC-8 1H NMR

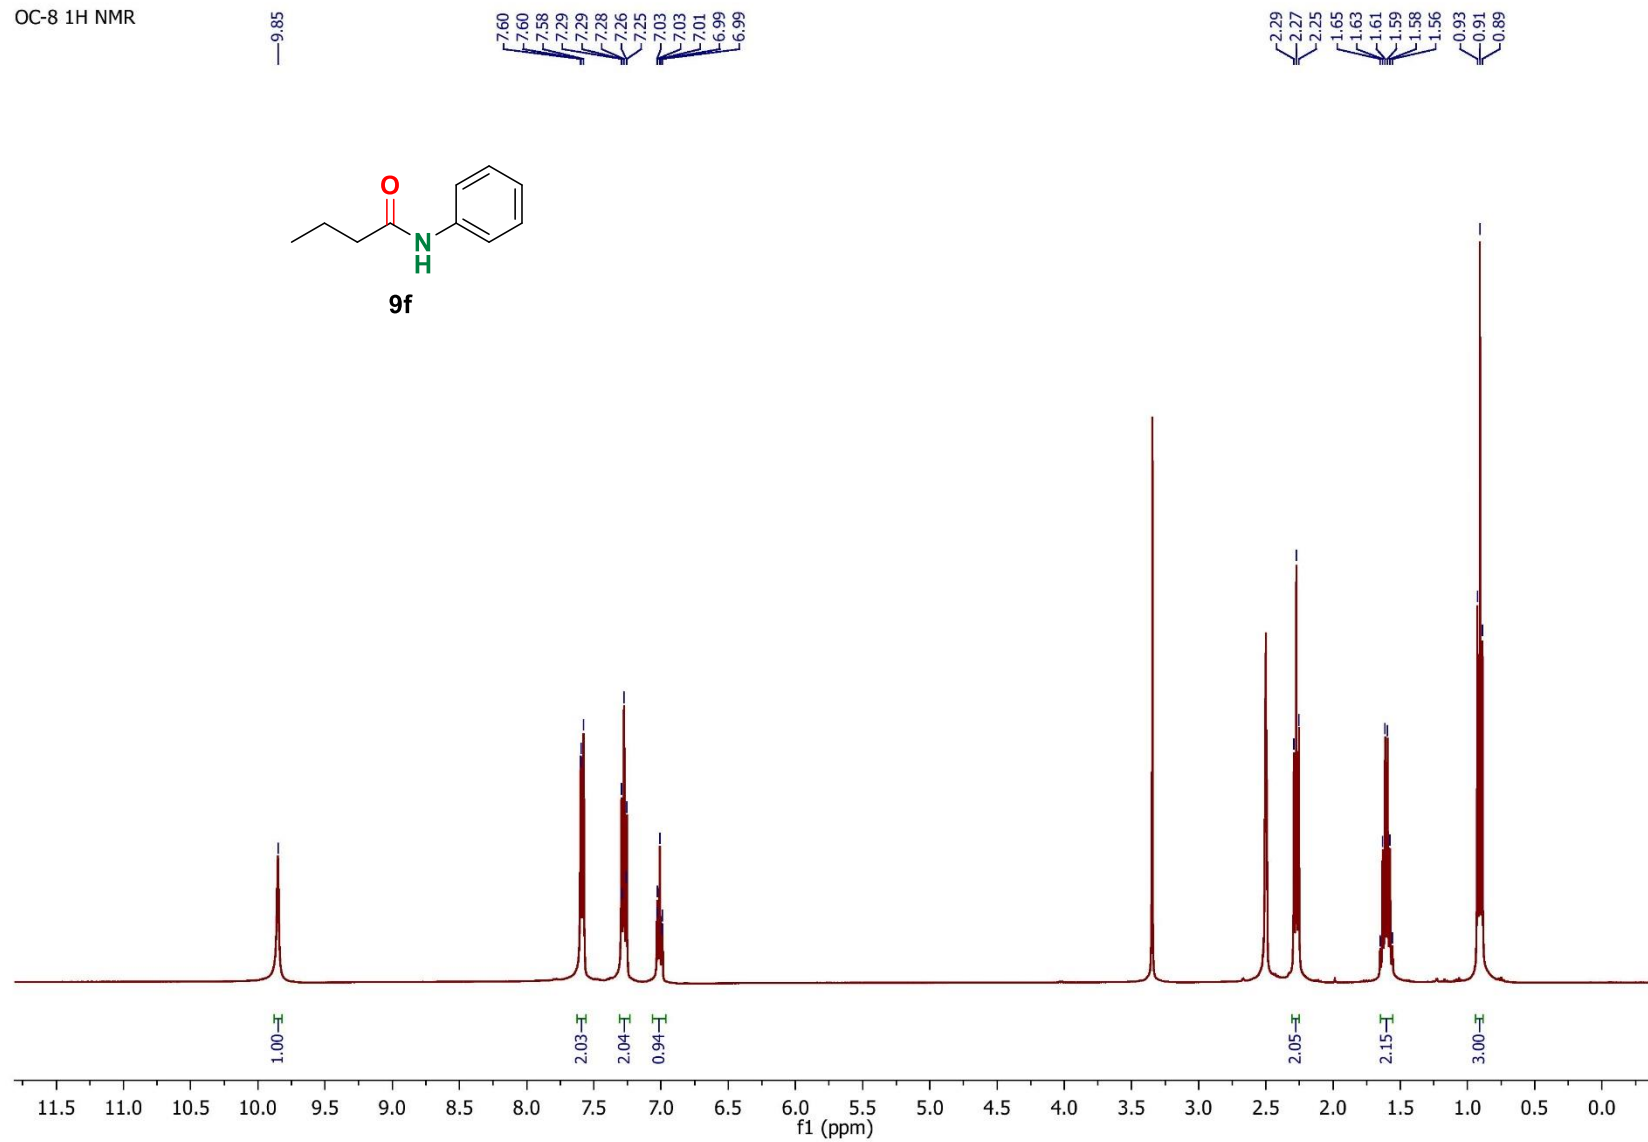

Figure S98. <sup>1</sup>H NMR Spectrum of **9f** (400MHz, DMSO-d<sub>6</sub>)

OC-8 13C NMR

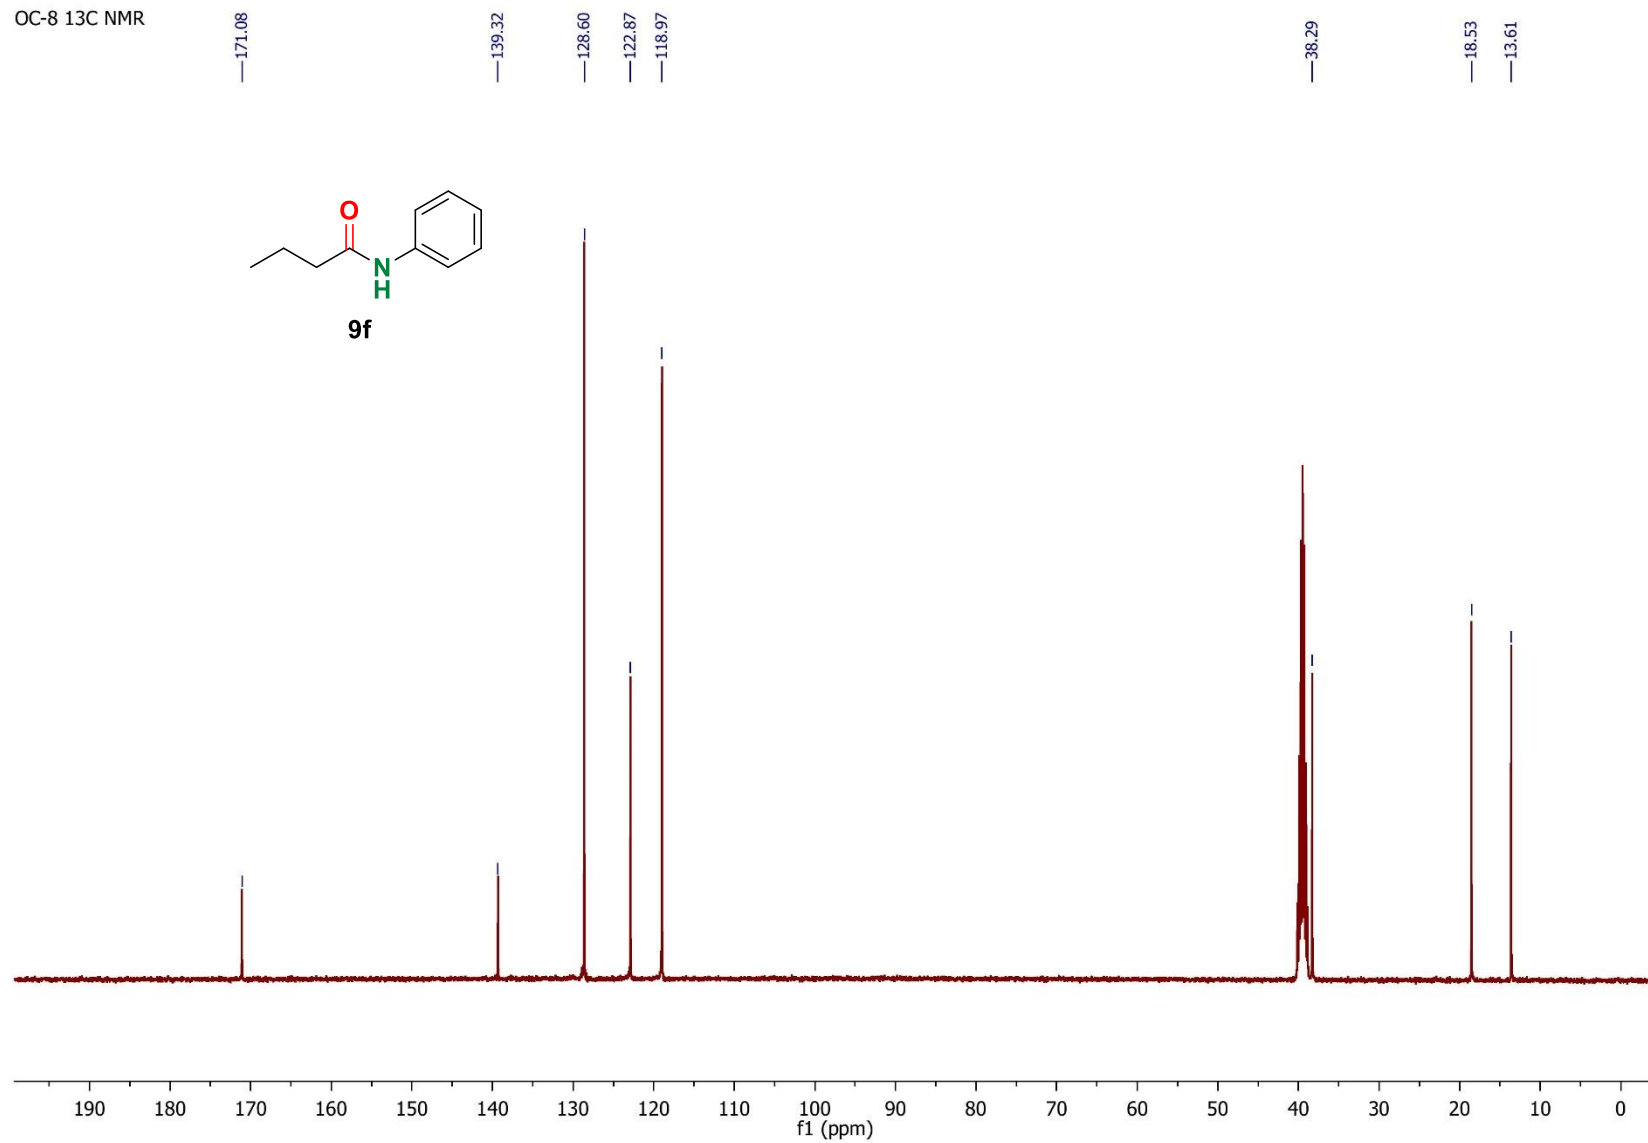

Figure S99. <sup>13</sup>C NMR Spectrum of 9f (101MHz, DMSO-d<sub>6</sub>)

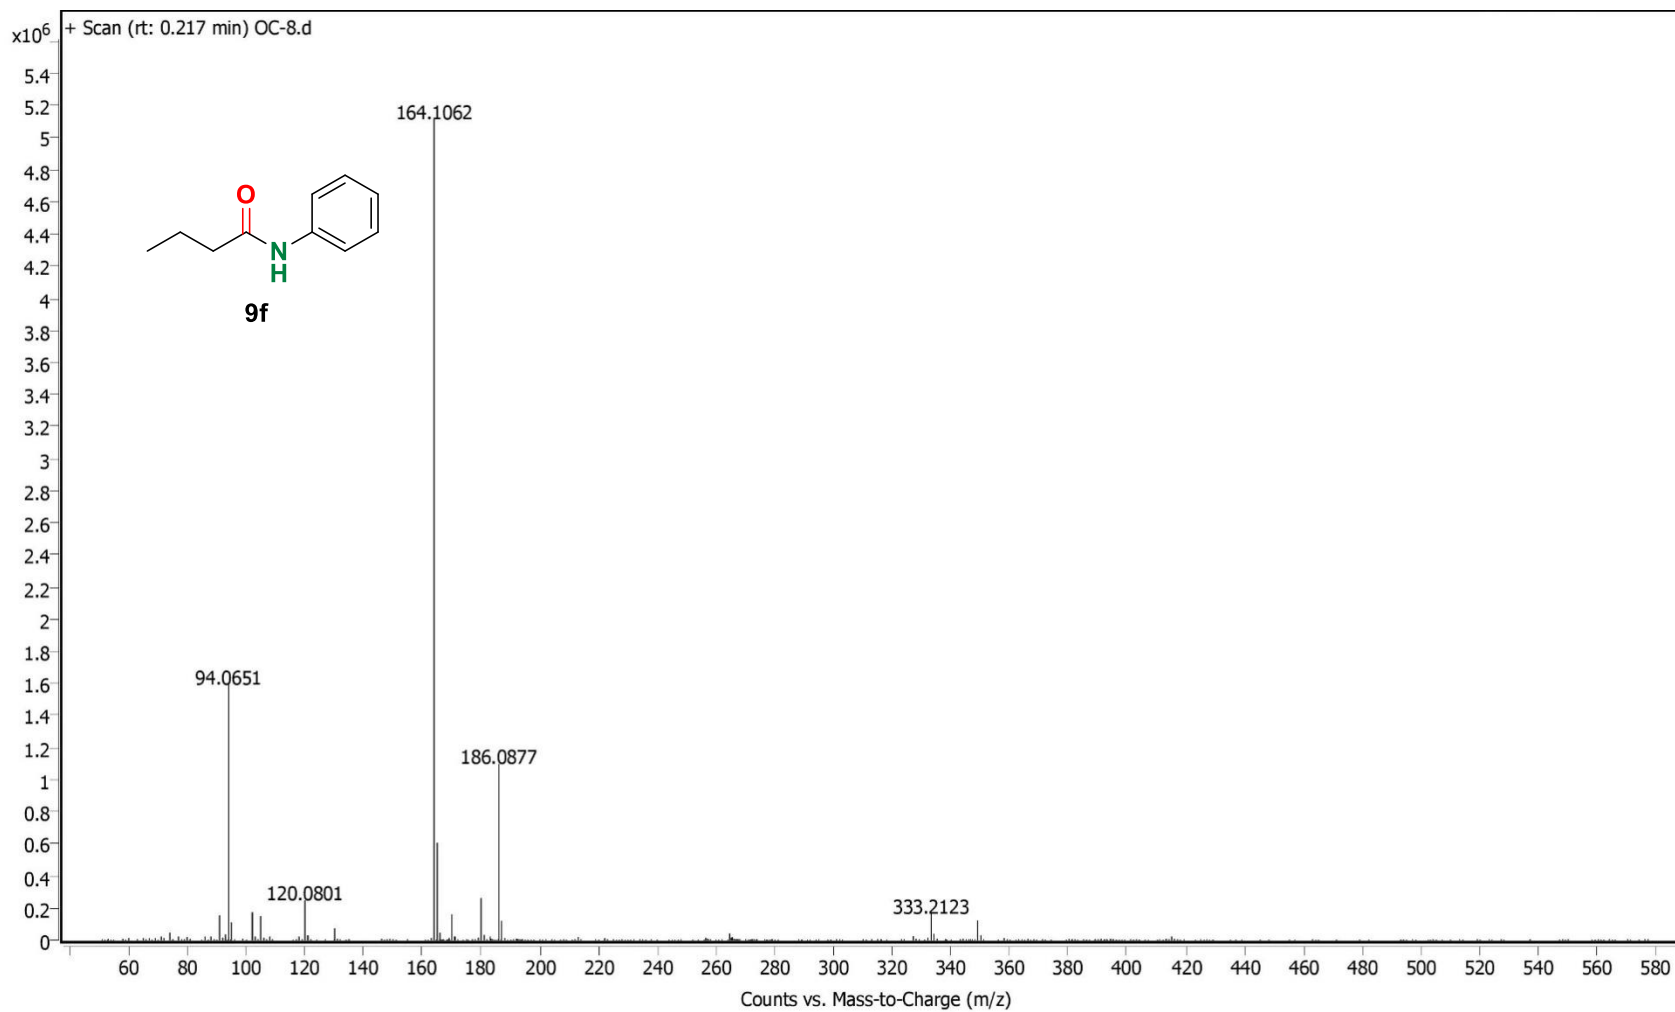

**Figure S100.** HRMS Spectrum of **9f**

OC-11 1H NMR

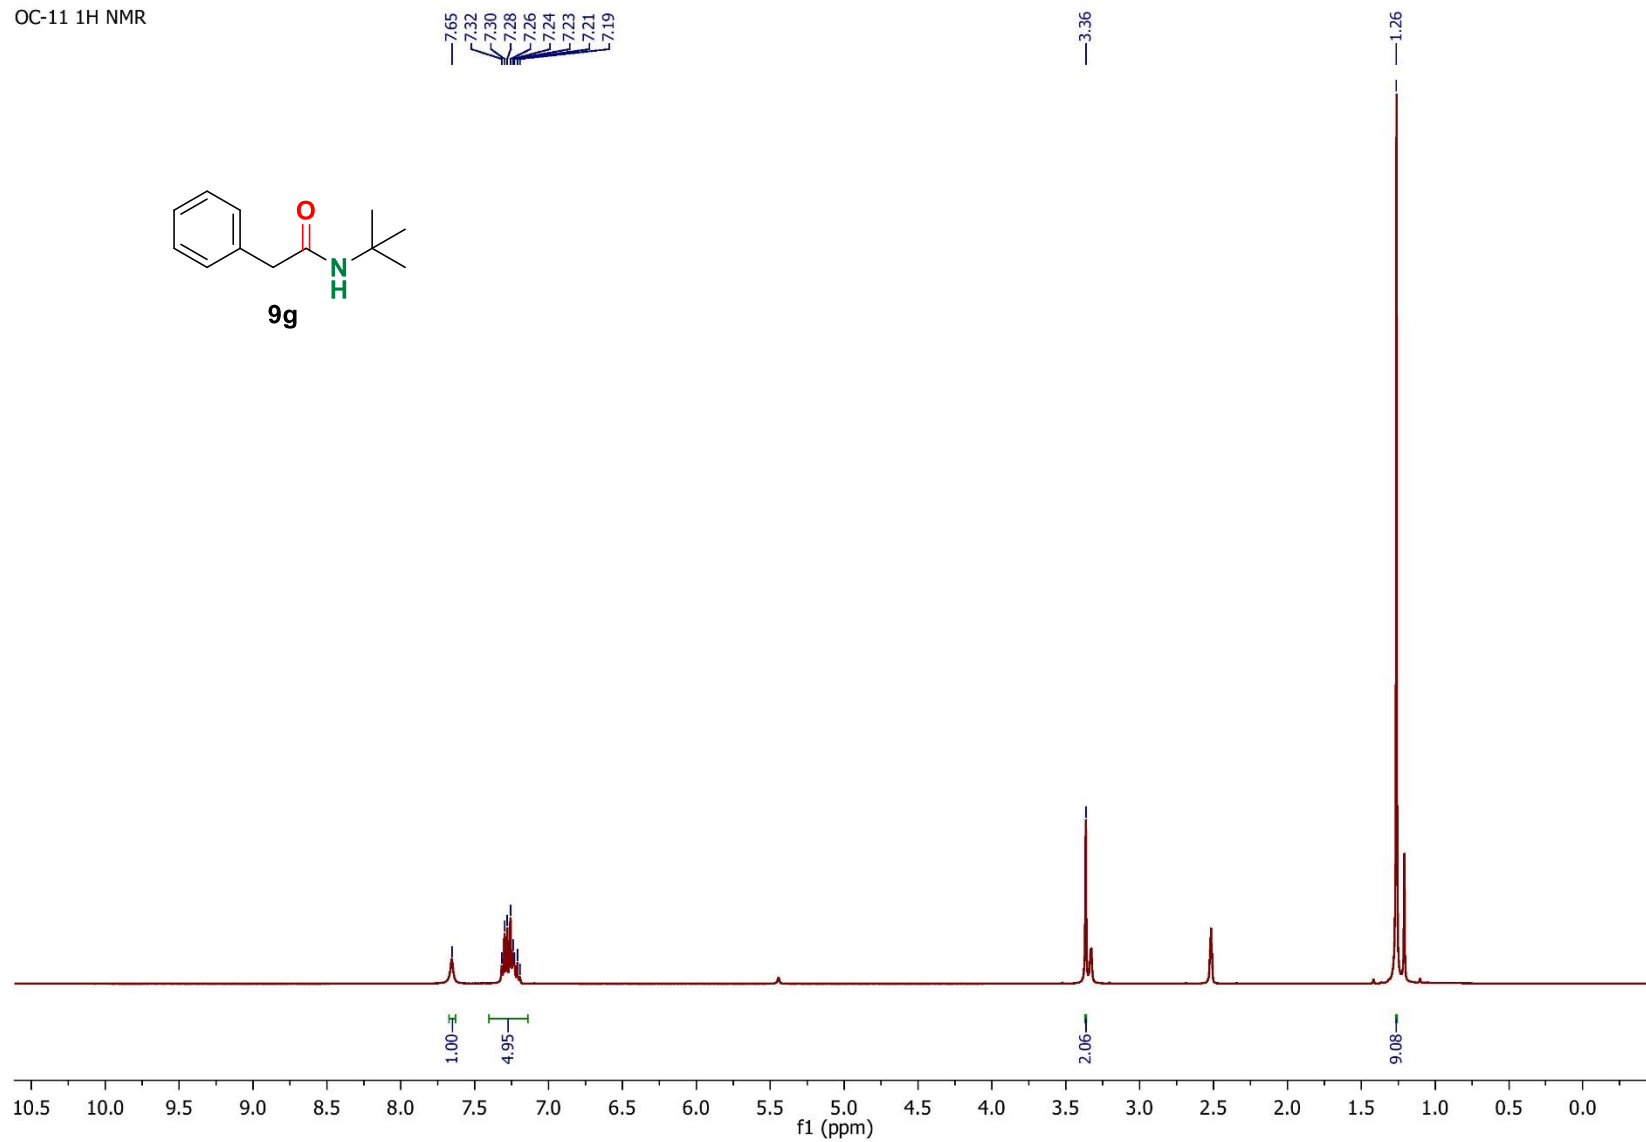

Figure S101. <sup>1</sup>H NMR Spectrum of **9g** (400MHz, DMSO-d<sub>6</sub>)

OC-11 13C NMR

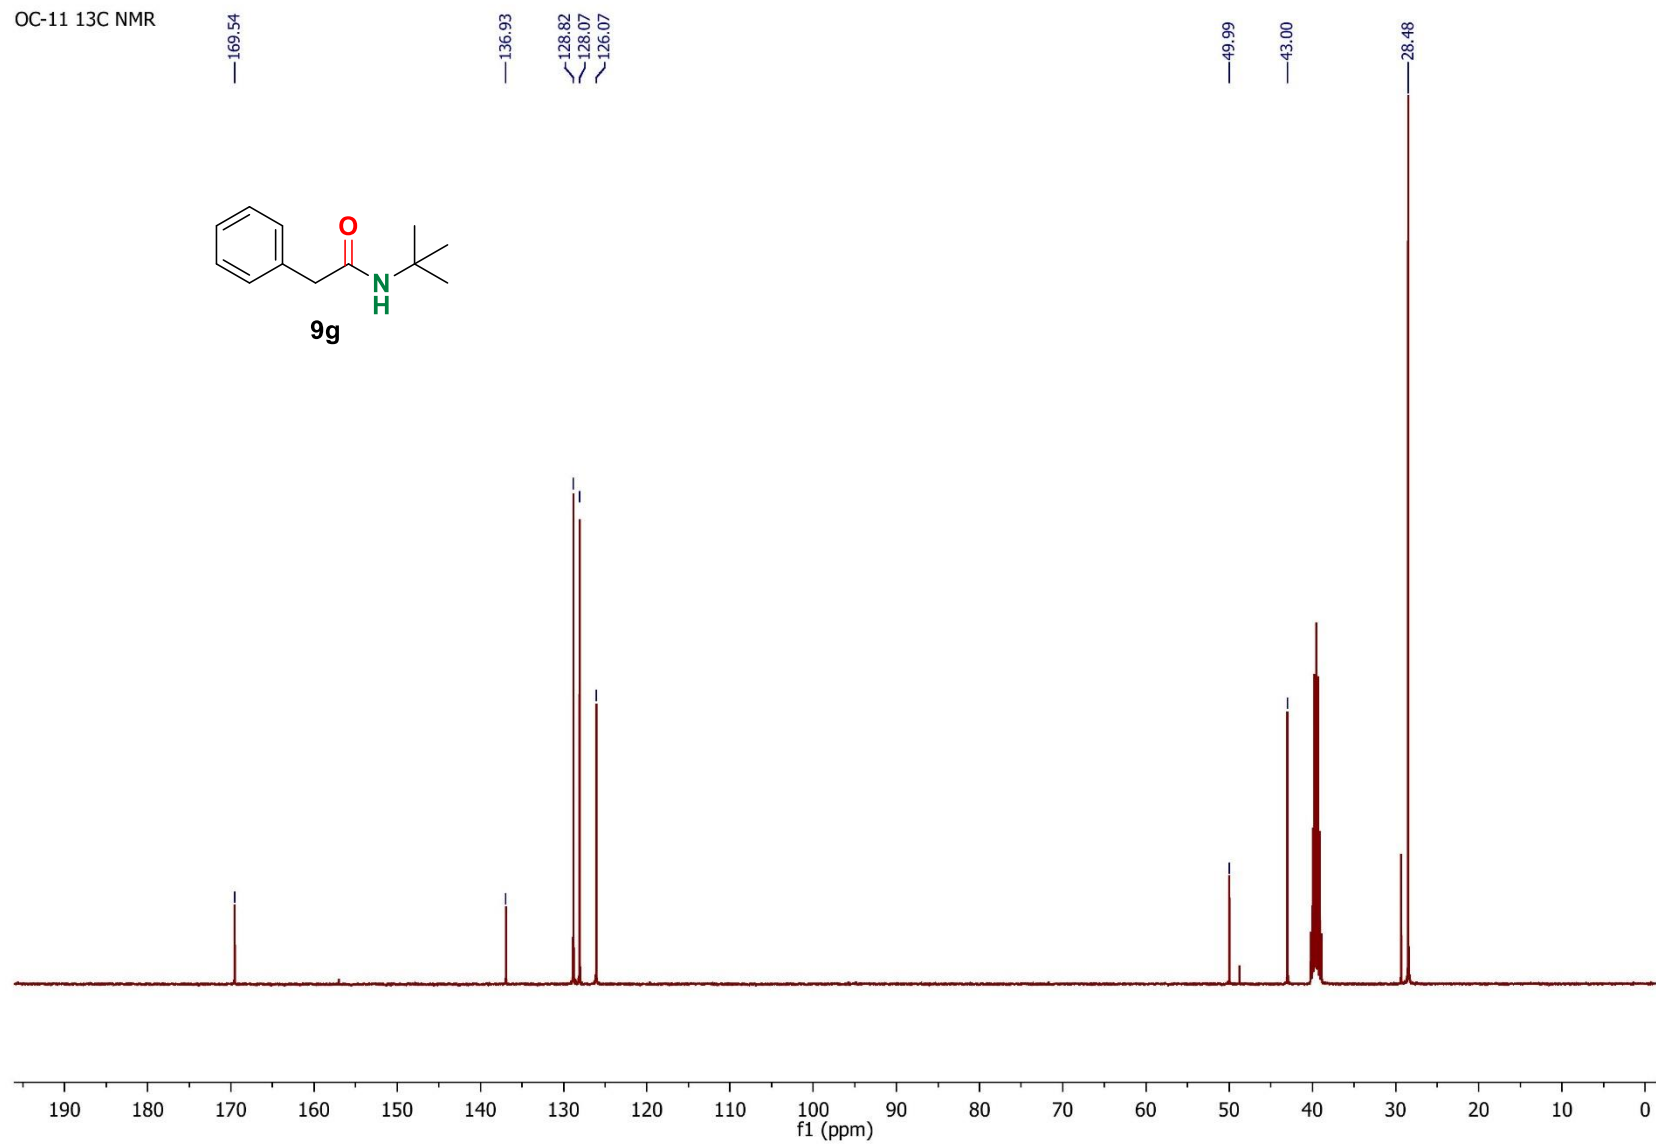

Figure S102. <sup>13</sup>C NMR Spectrum of **9g** (101MHz, DMSO-d<sub>6</sub>)

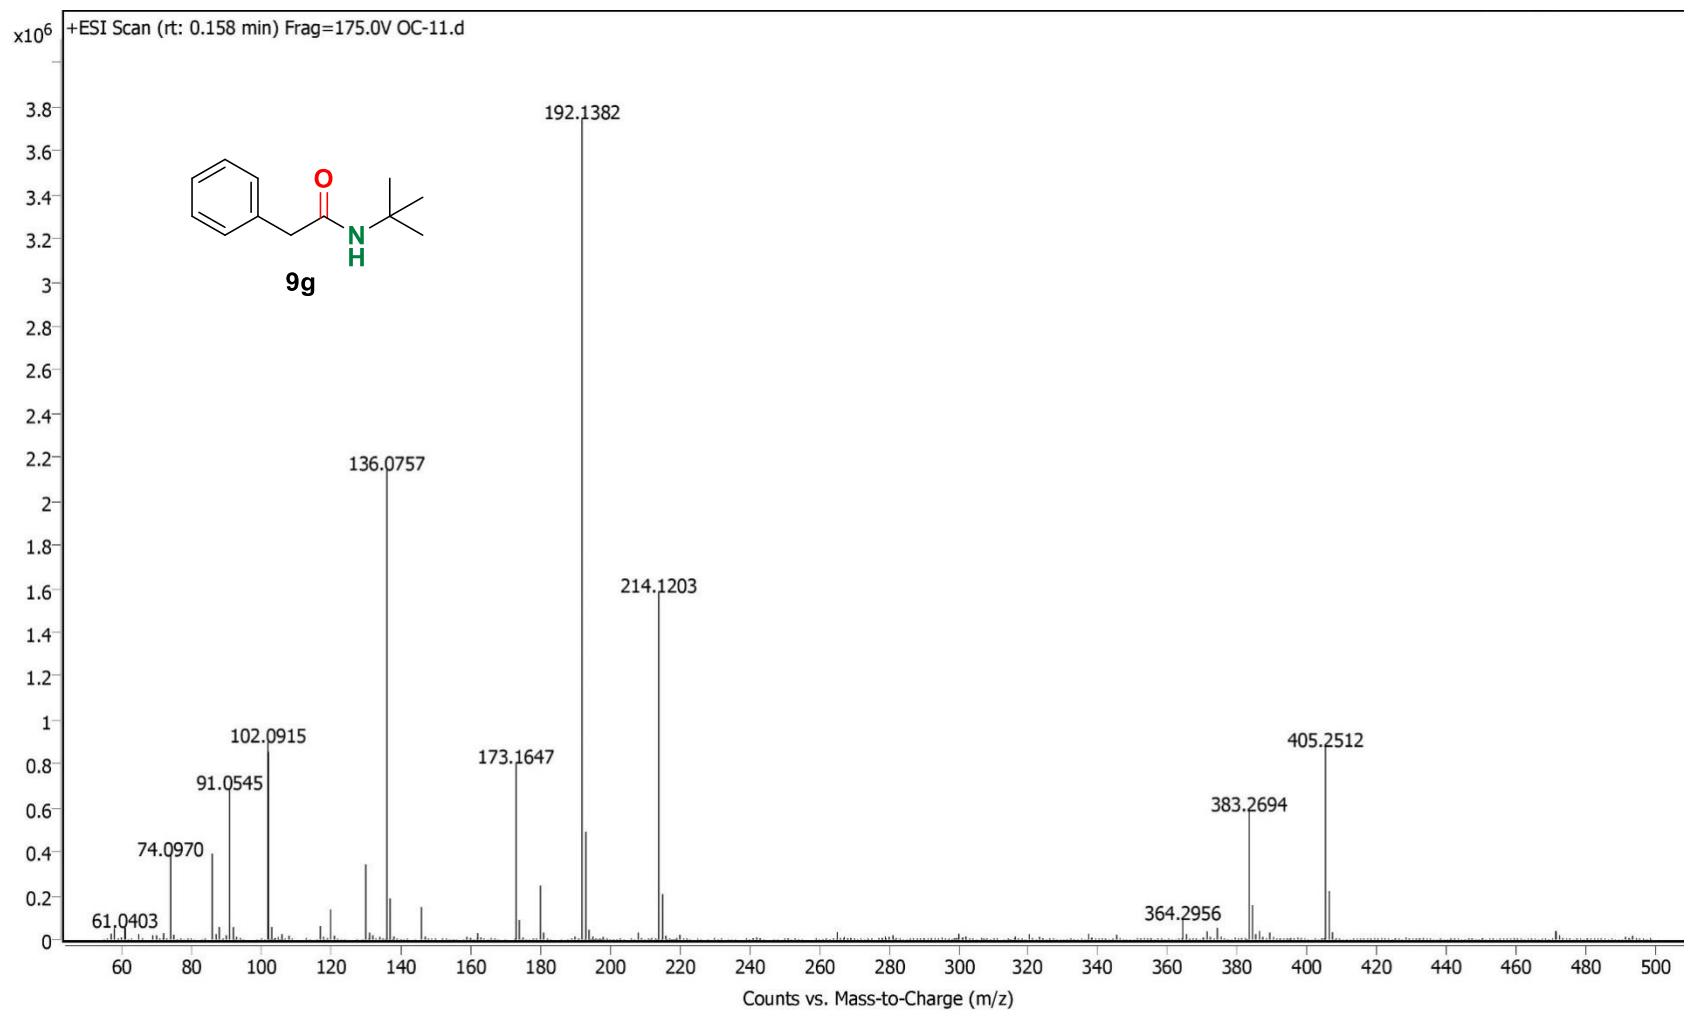

**Figure S103.** HRMS Spectrum of **9g**

OC-4 1H NMR

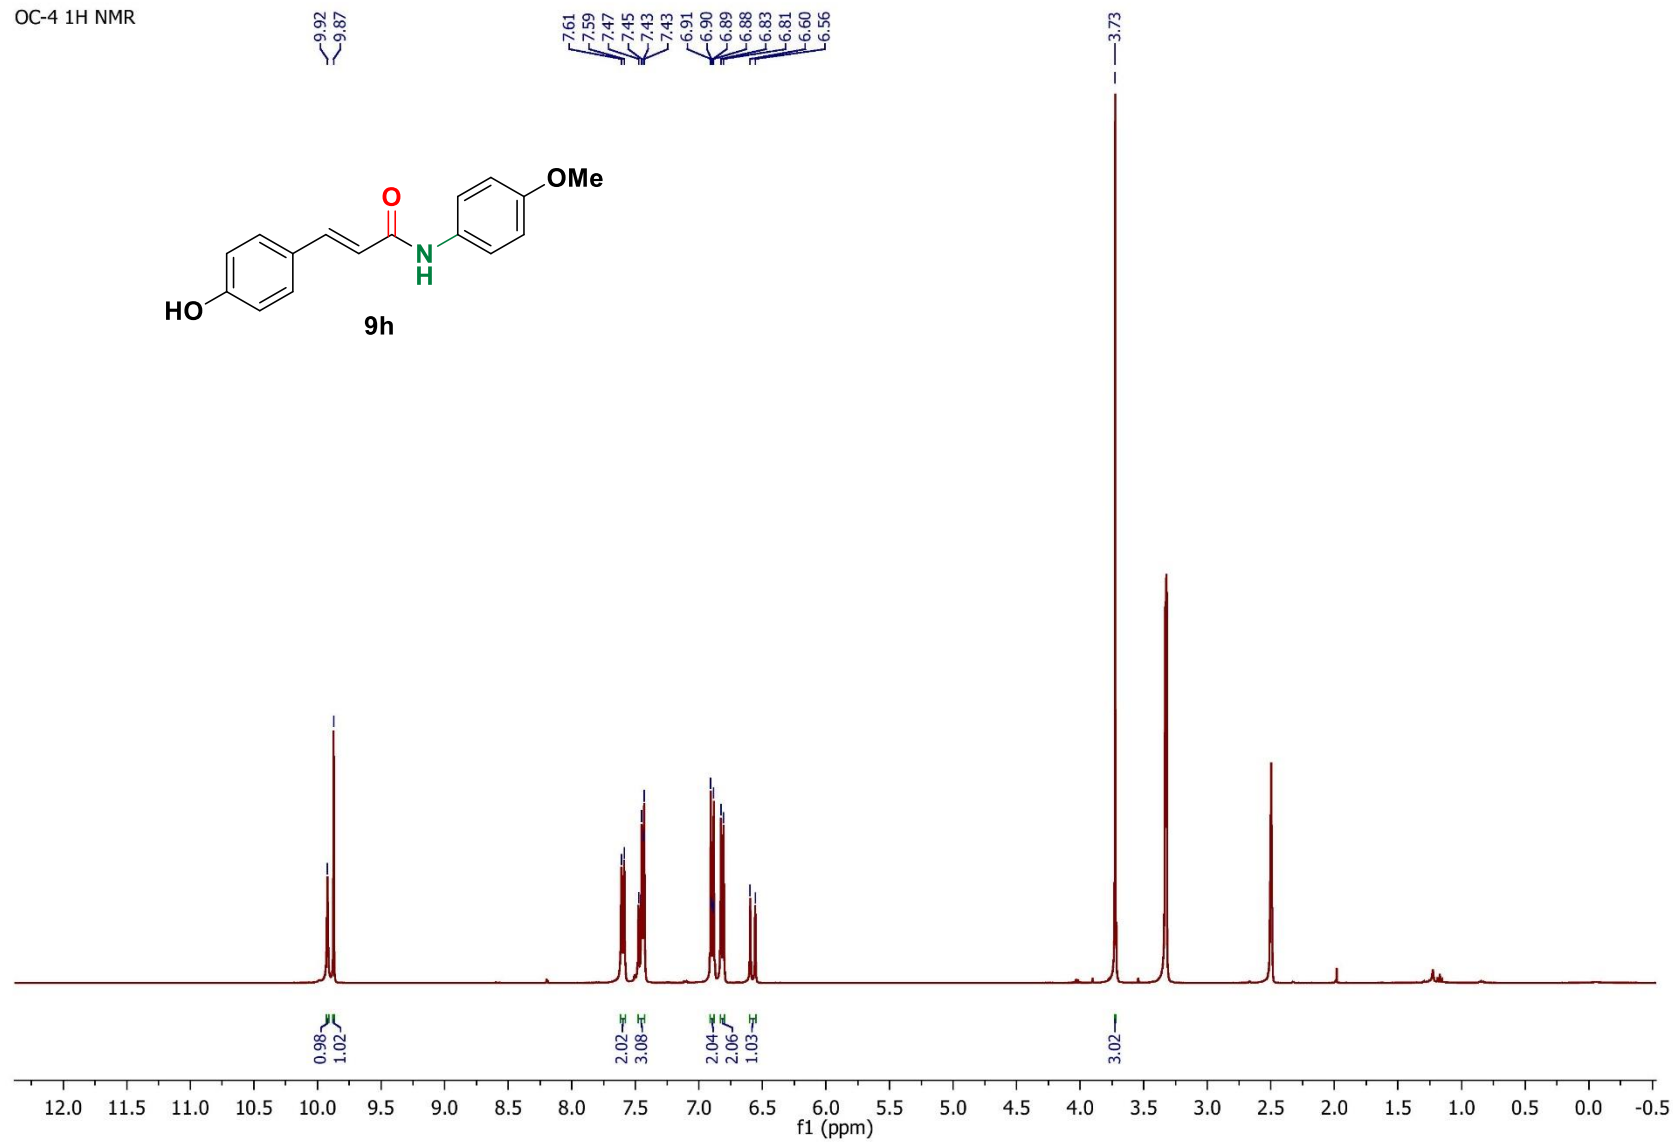

Figure S104. <sup>1</sup>H NMR Spectrum of **9h** (400MHz, DMSO-d<sub>6</sub>)

OC-4 13C NMR

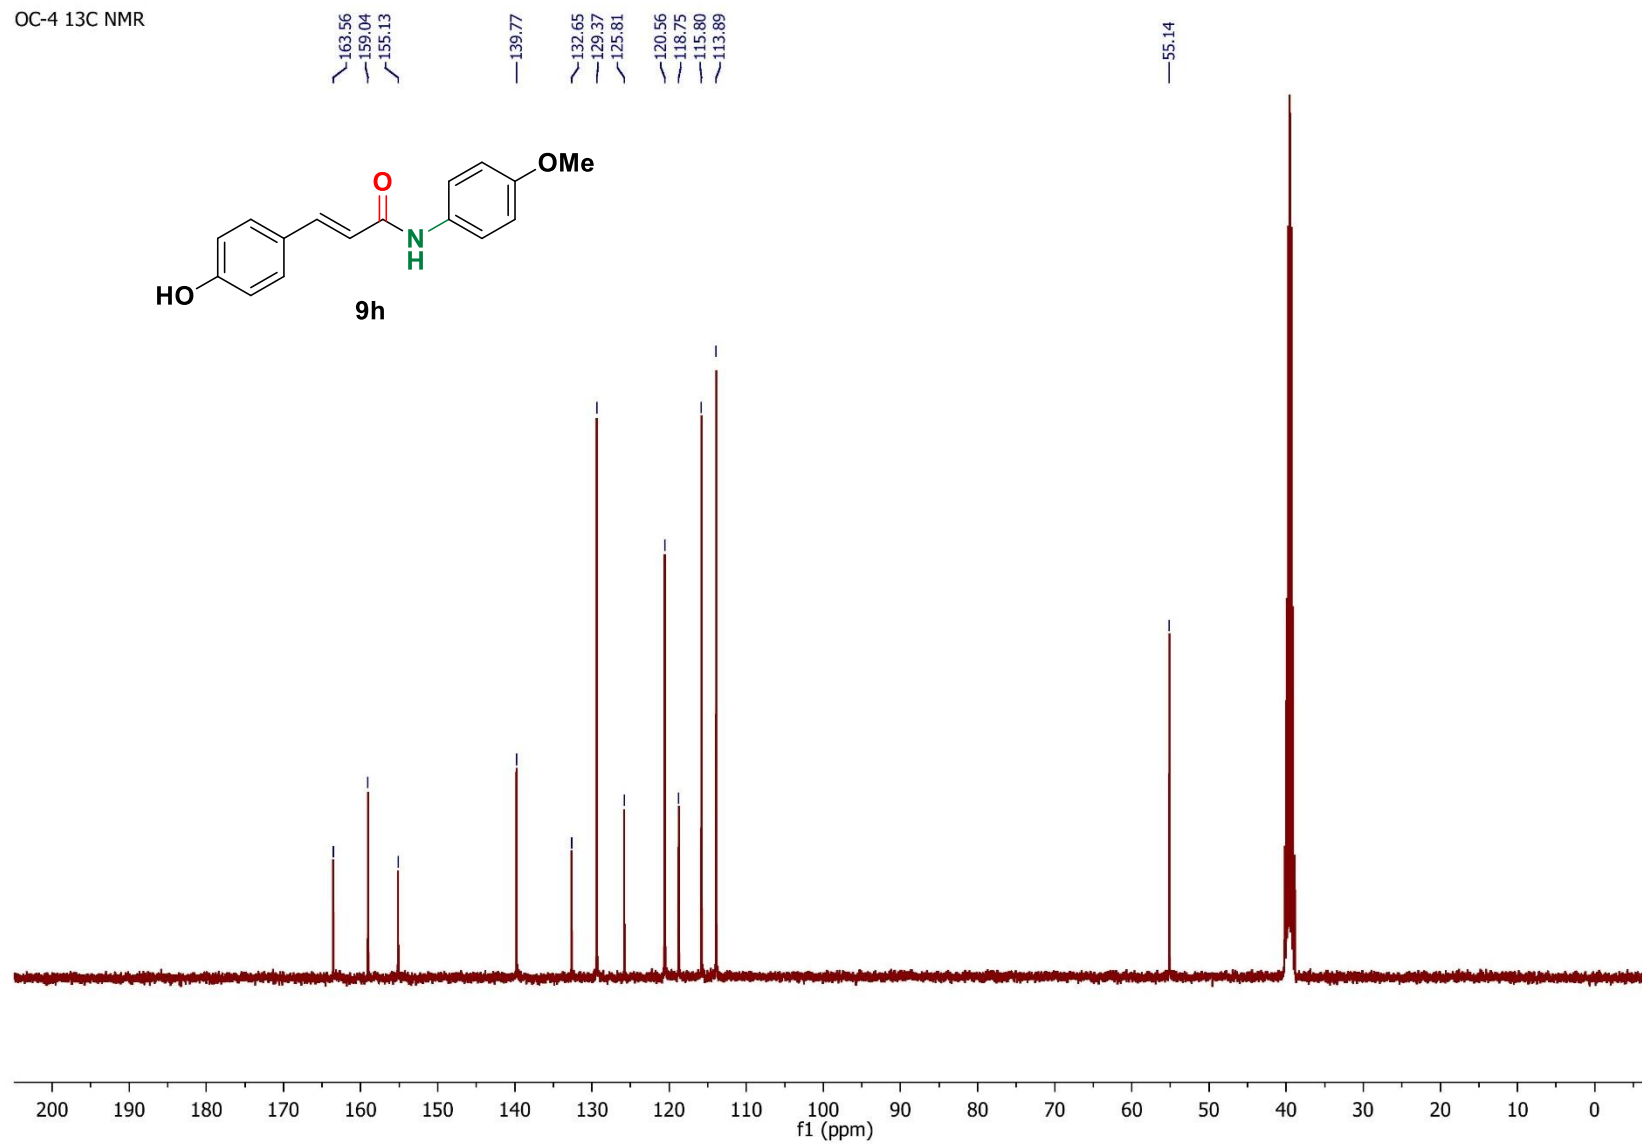

Figure S105.  $^{13}\text{C}$  NMR Spectrum of 9h (101MHz, DMSO- $d_6$ )



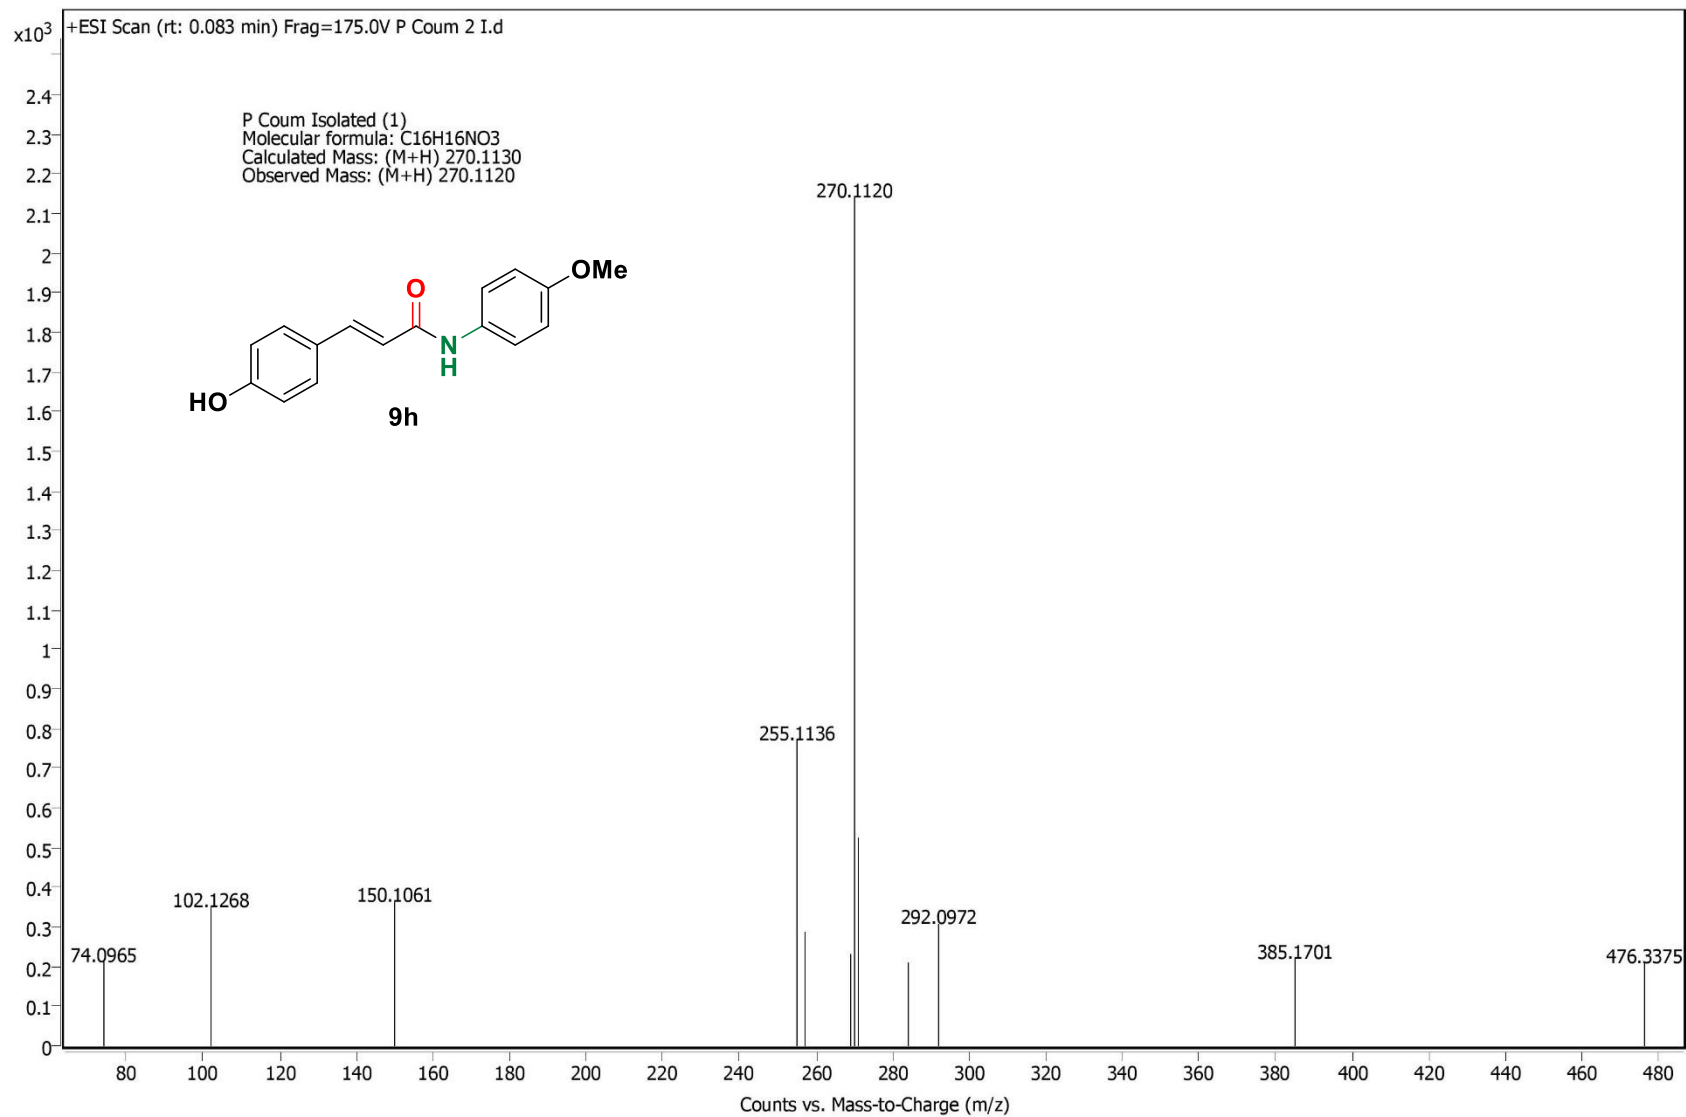

**Figure S106.** HRMS Spectrum of **9h**

AC-1 1H NMR

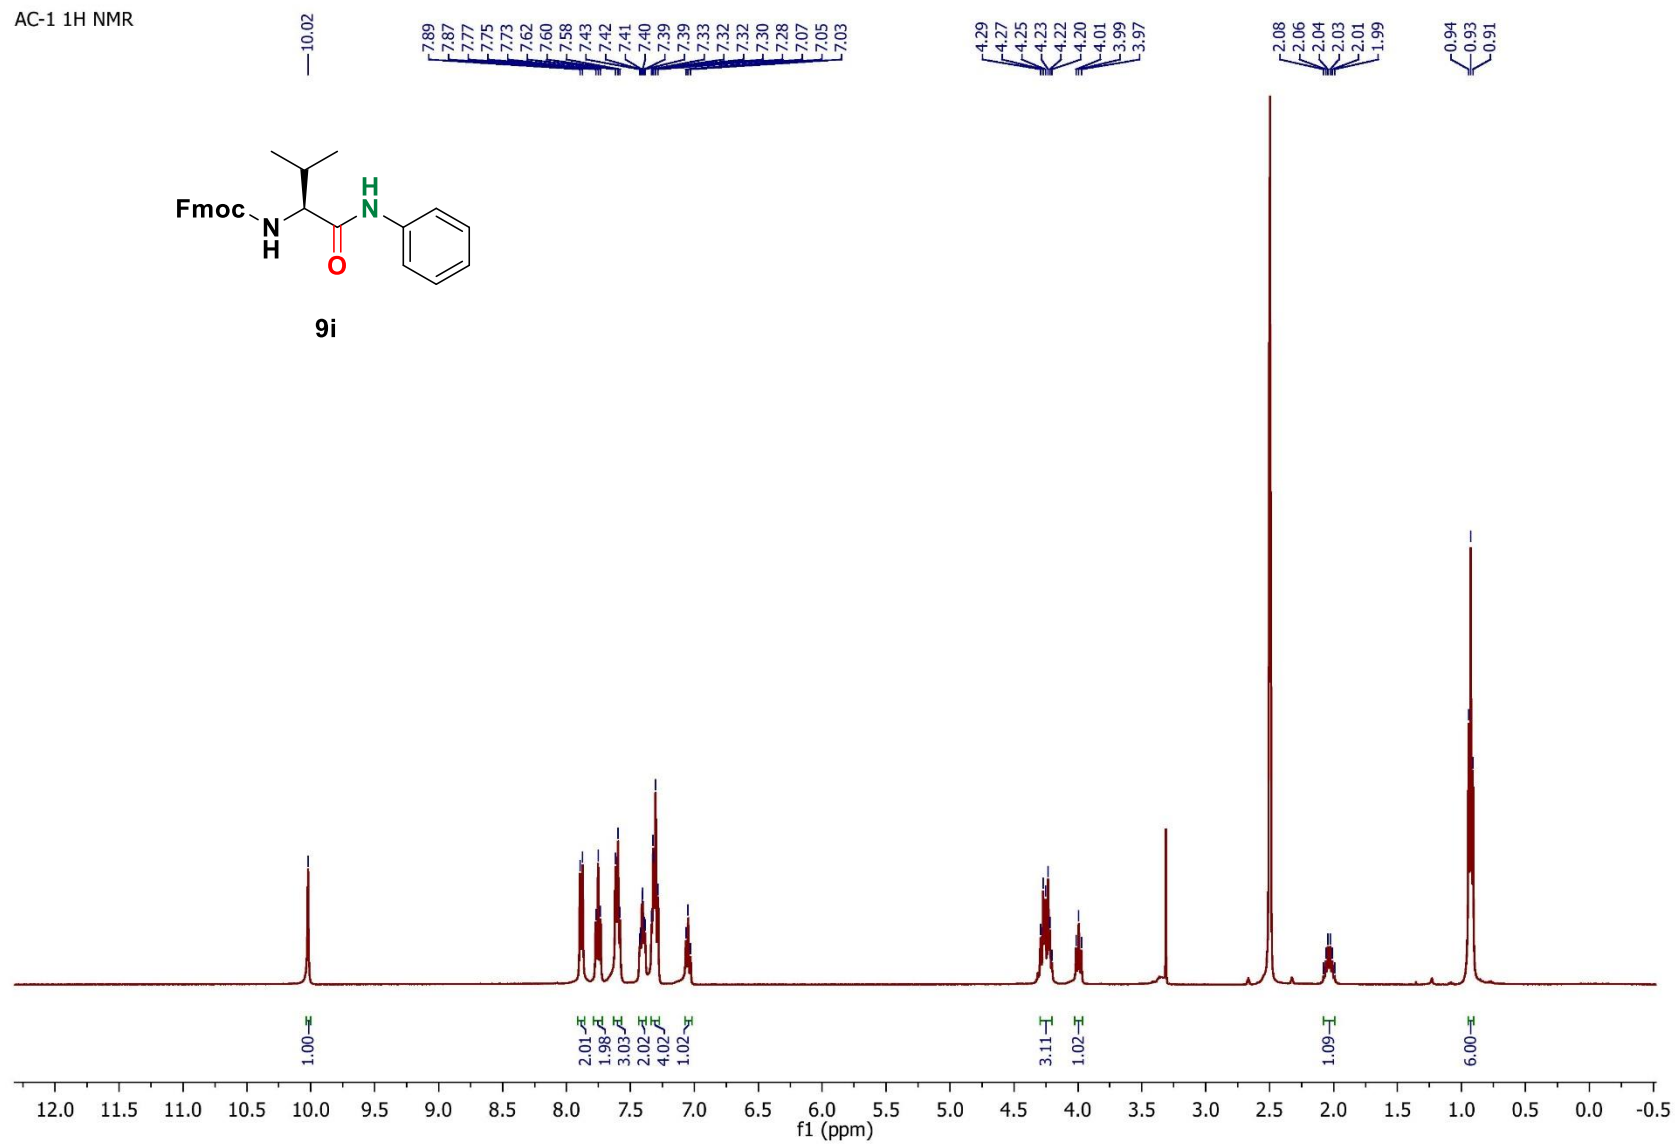

Figure S107. <sup>1</sup>H NMR Spectrum of **9i** (400MHz, DMSO-d<sub>6</sub>)

AC-1 <sup>13</sup>C NMR

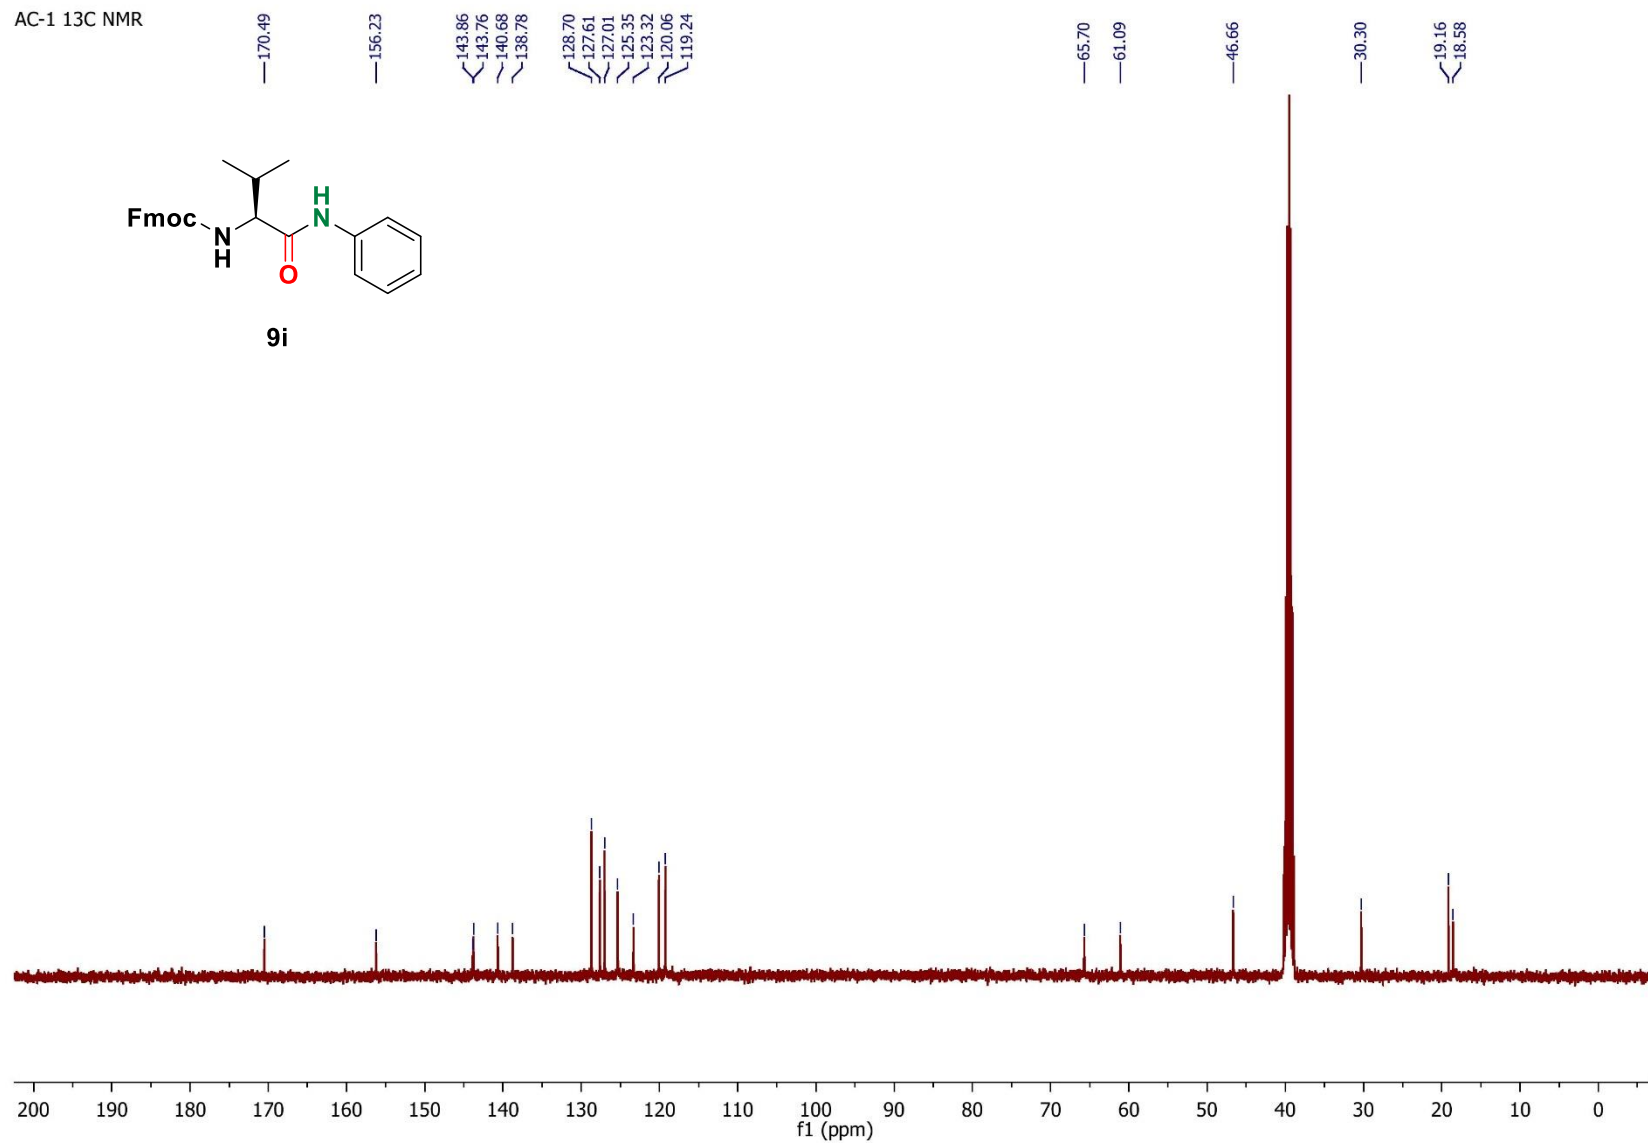

**Figure S108.** <sup>13</sup>C NMR Spectrum of **9i** (101MHz, DMSO-d<sub>6</sub>)

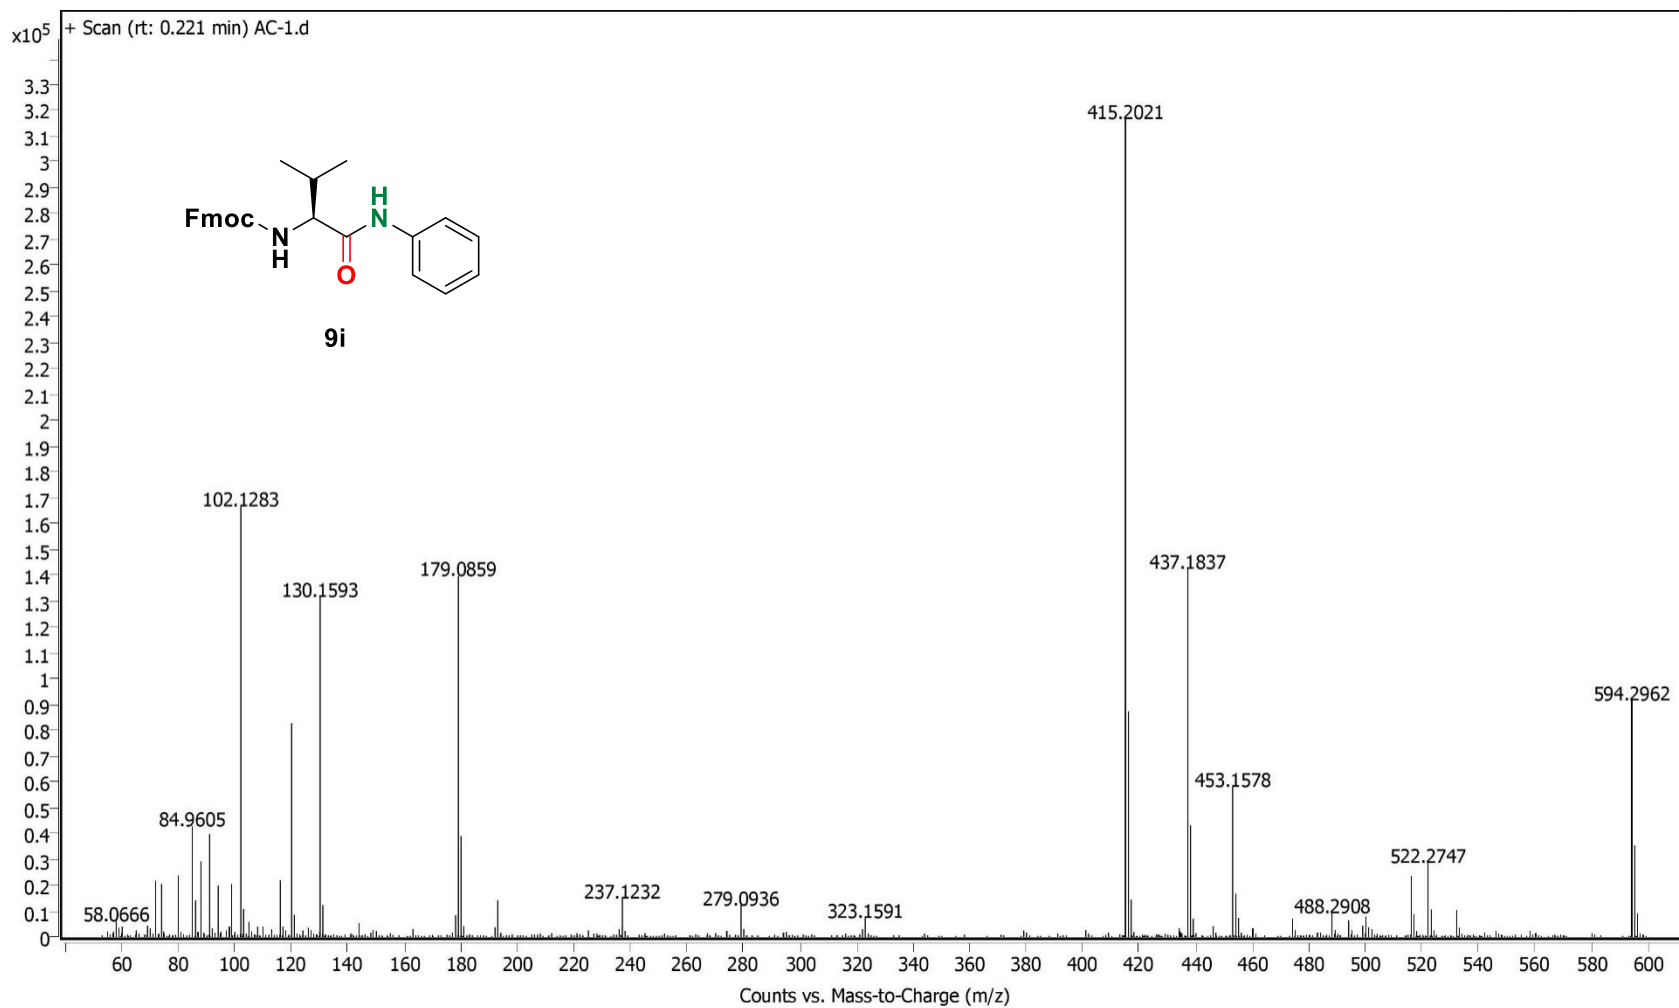

**Figure S109.** HRMS Spectrum of **9i**

AC-2 1H NMR

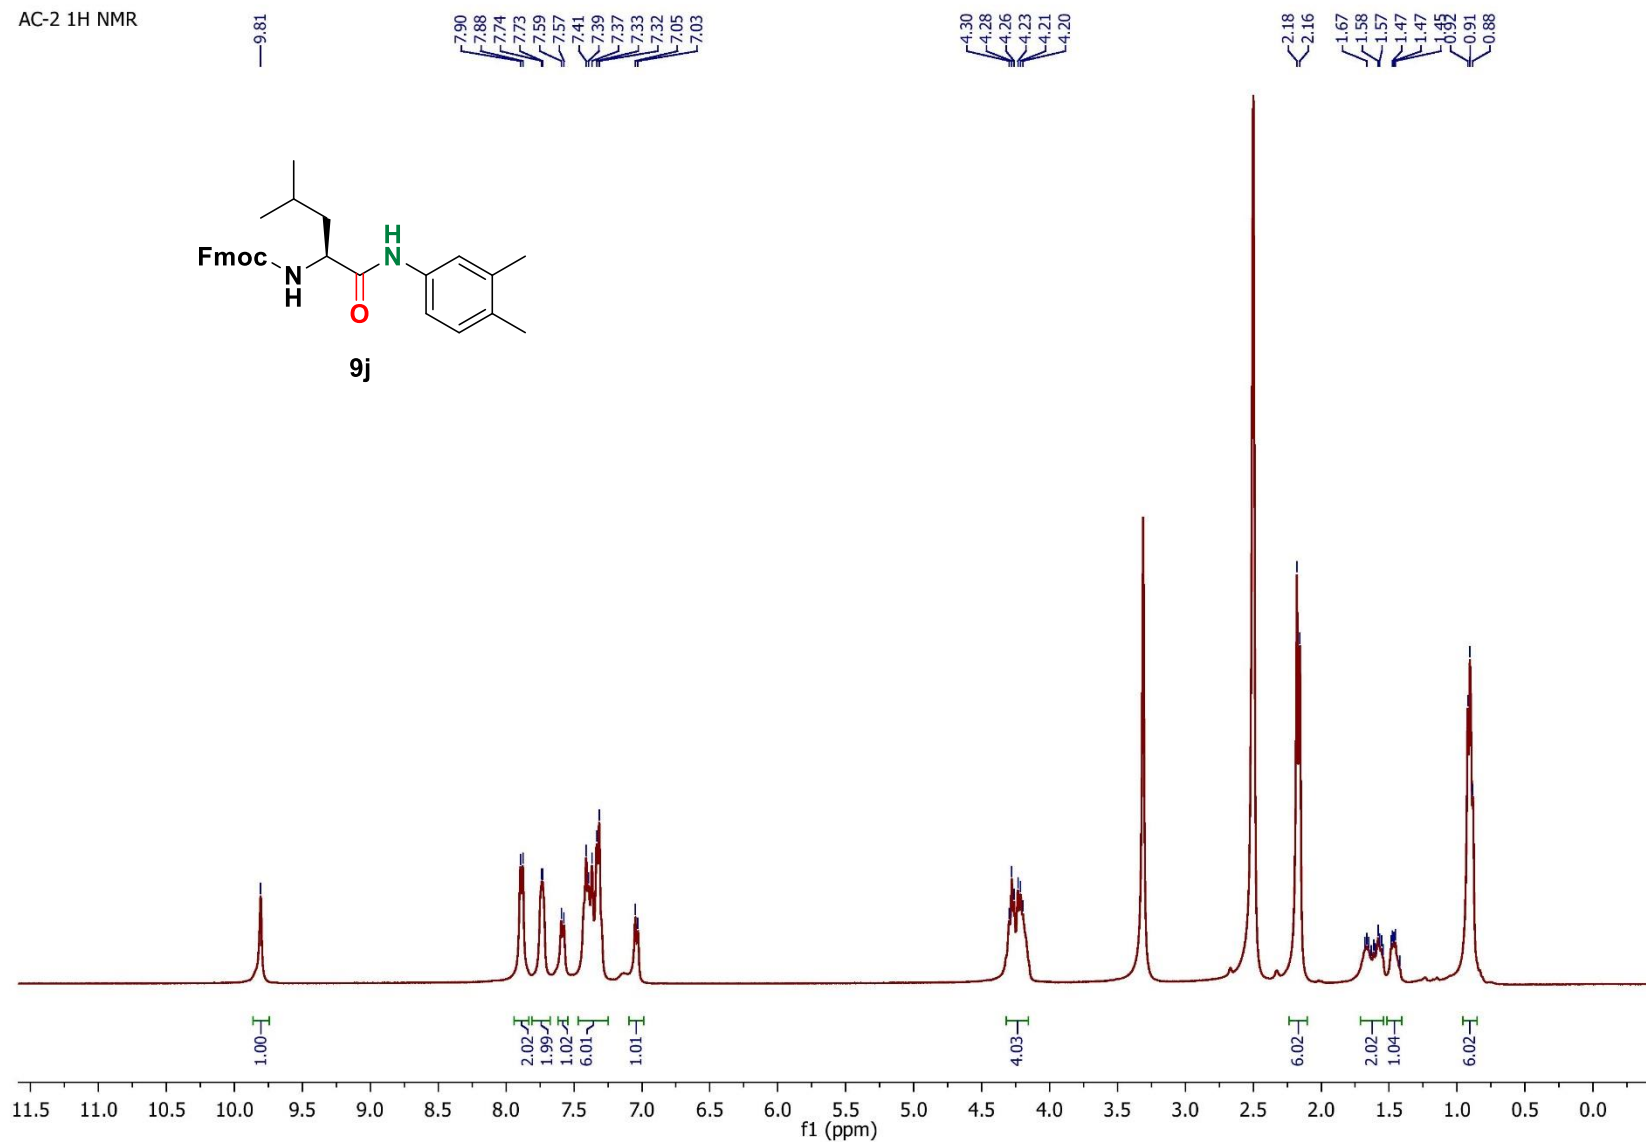

Figure S110. <sup>1</sup>H NMR Spectrum of 9j (400MHz, DMSO-d<sub>6</sub>)

AC-2 13C NMR

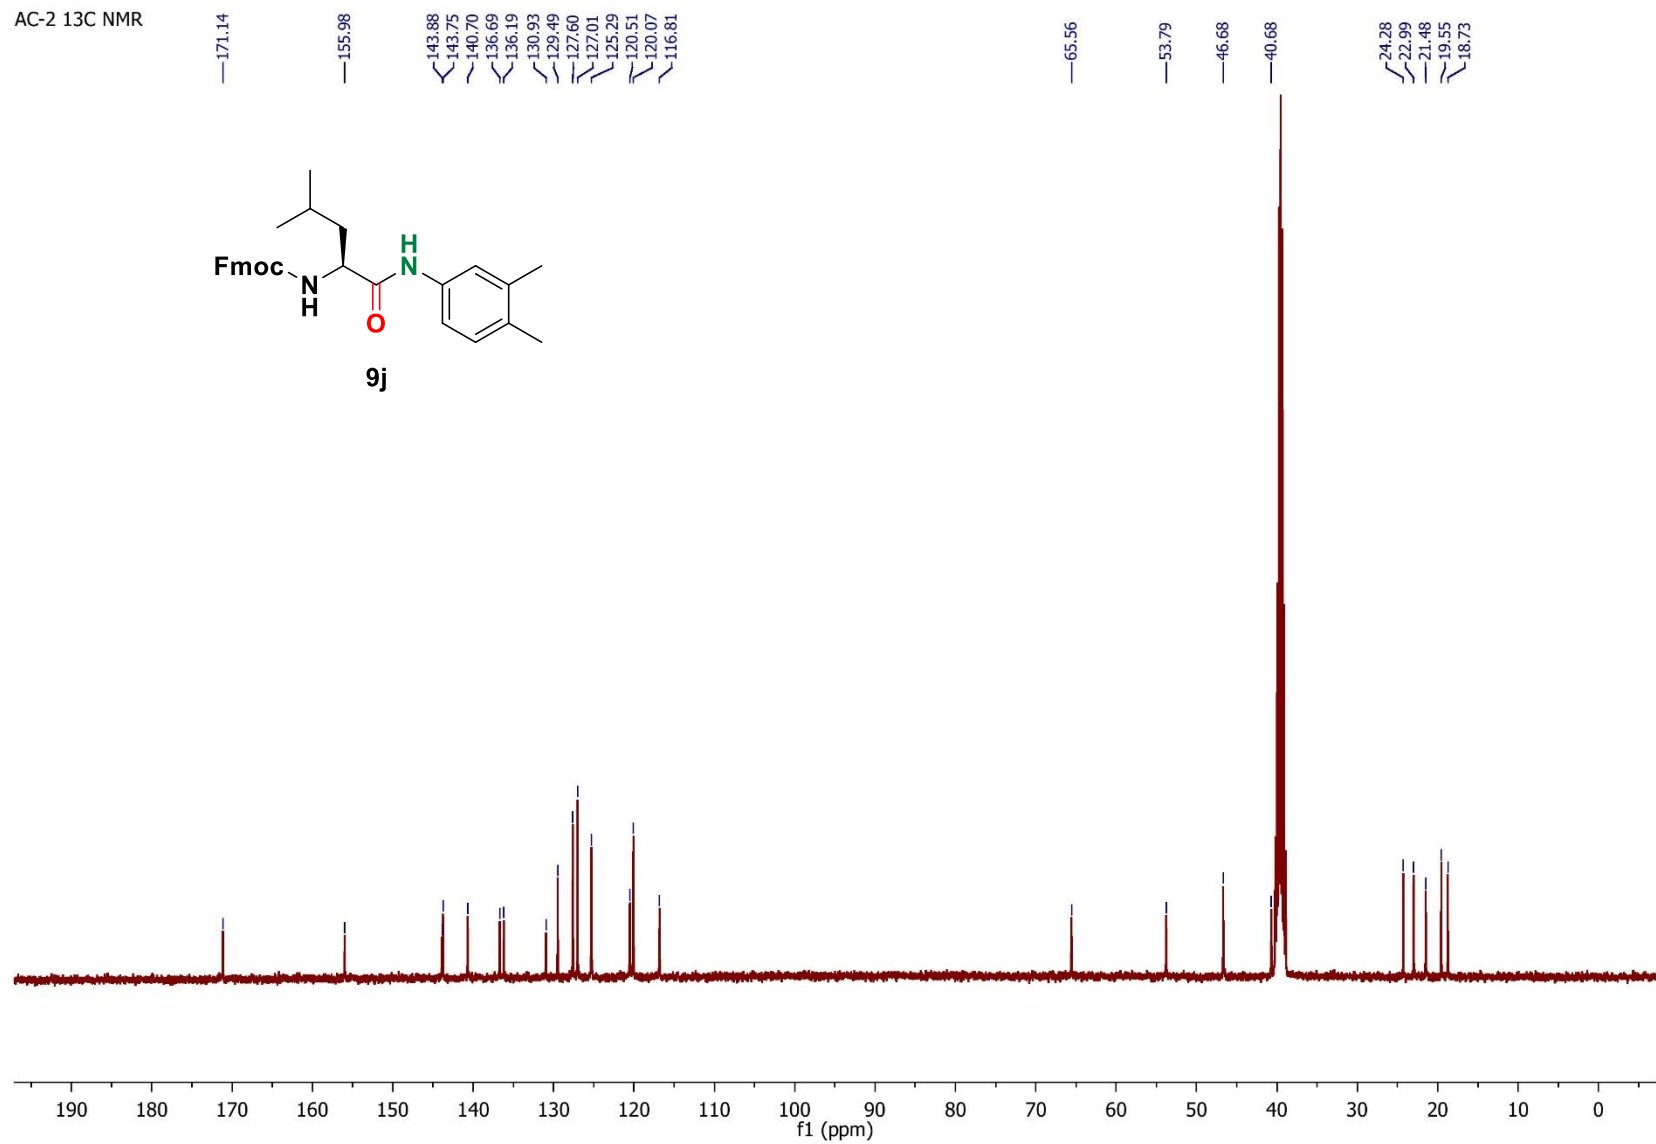

Figure S111.  $^{13}\text{C}$  NMR Spectrum of **9j** (101MHz,  $\text{DMSO-d}_6$ )

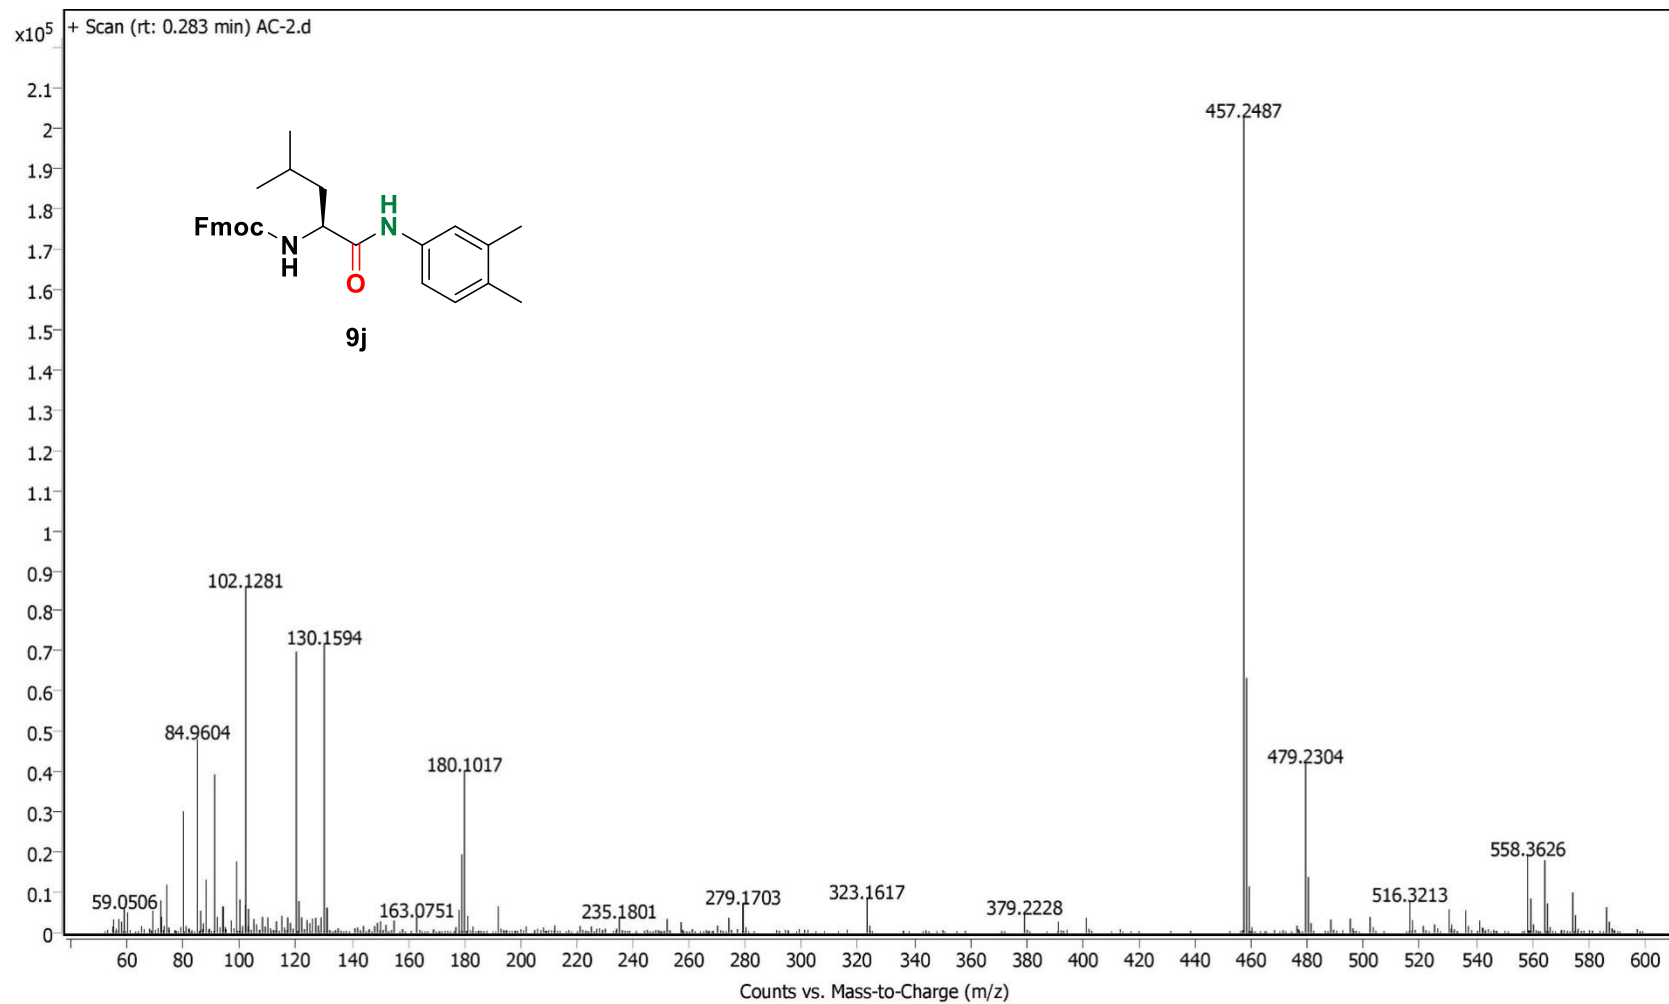

**Figure S112.** HRMS Spectrum of **9j**

PAN-2 1H

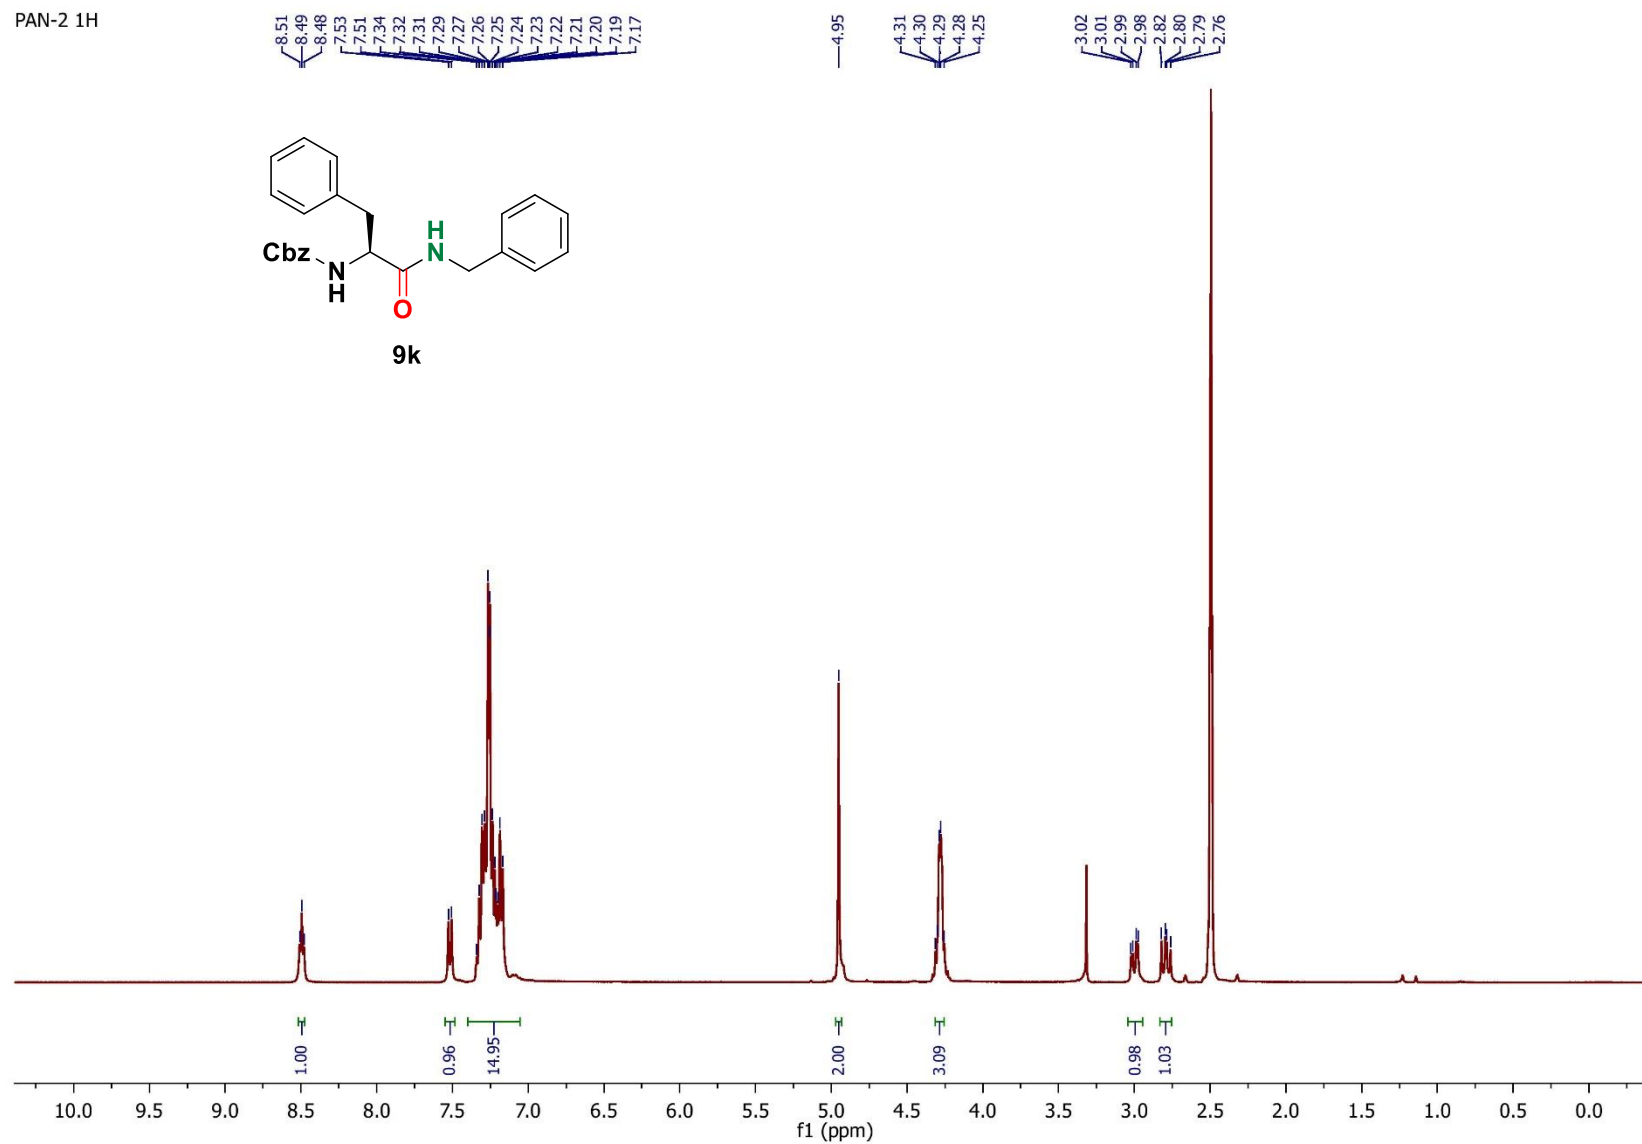

Figure S113. <sup>1</sup>H NMR Spectrum of **9k**(400MHz, DMSO-d<sub>6</sub>)



PAN-2 13C

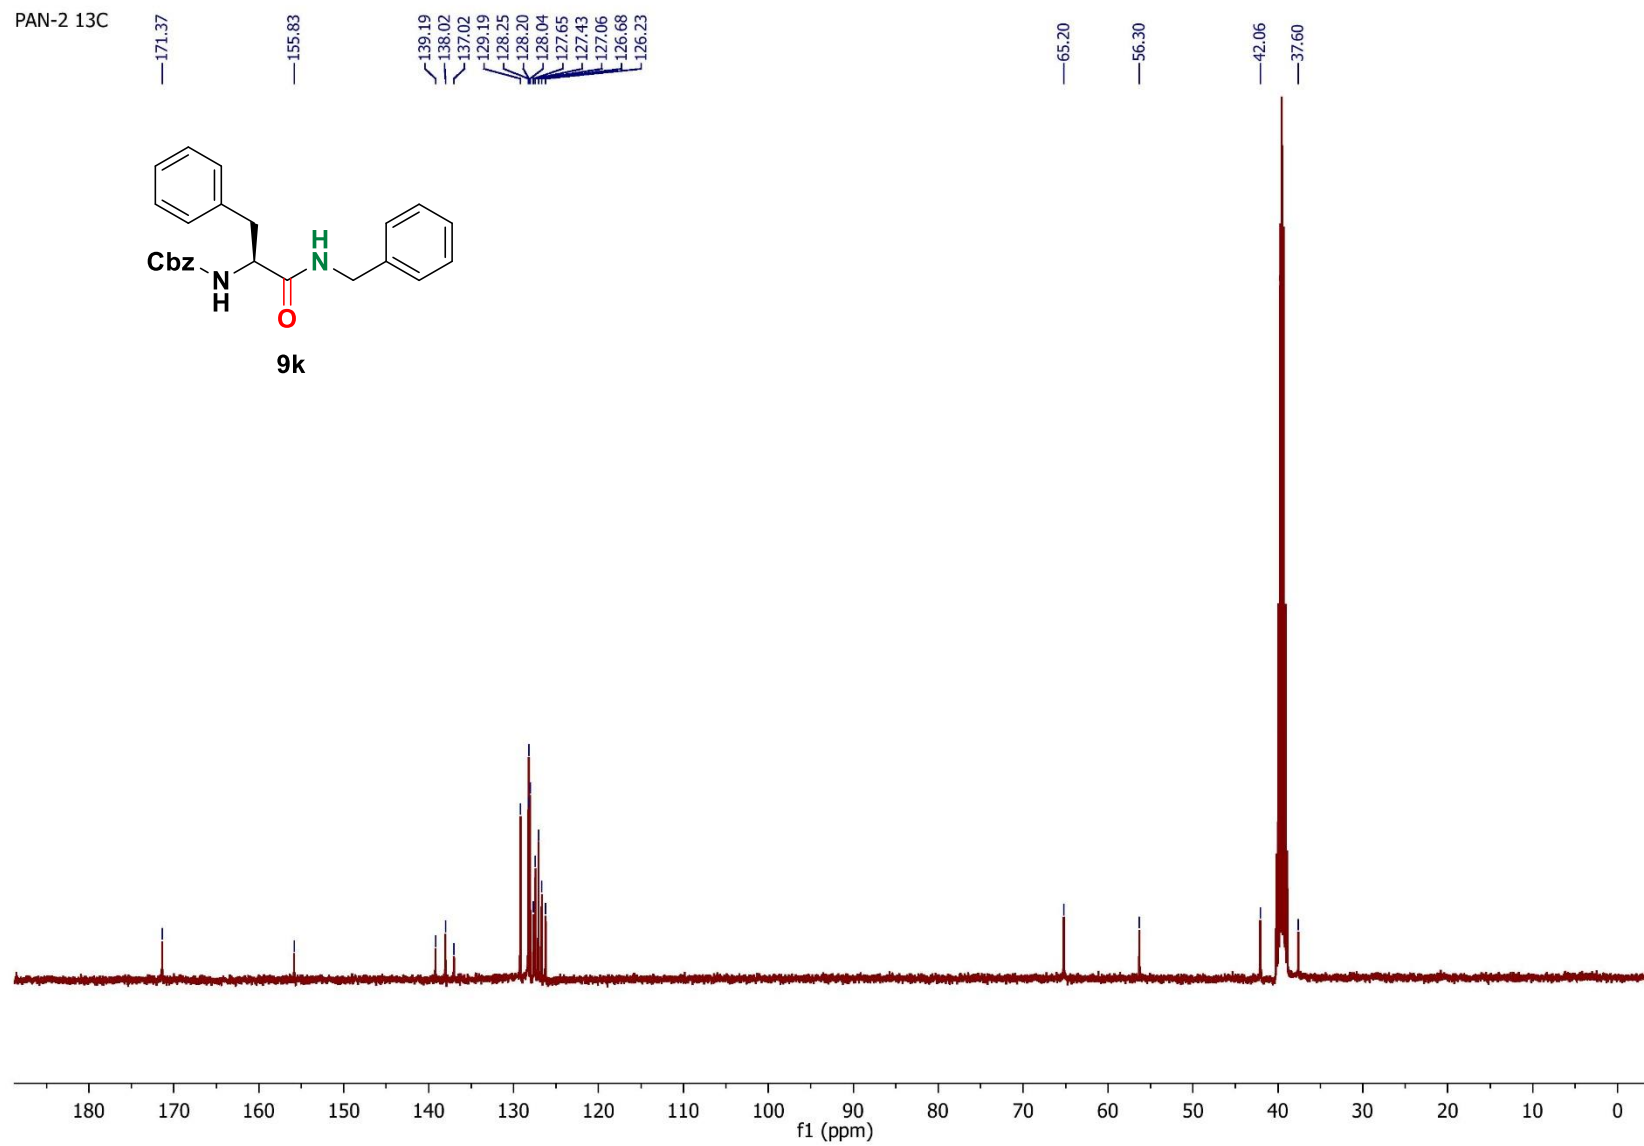

**Figure S114.**  $^{13}\text{C}$  NMR Spectrum of **9k** (101MHz, DMSO- $d_6$ )

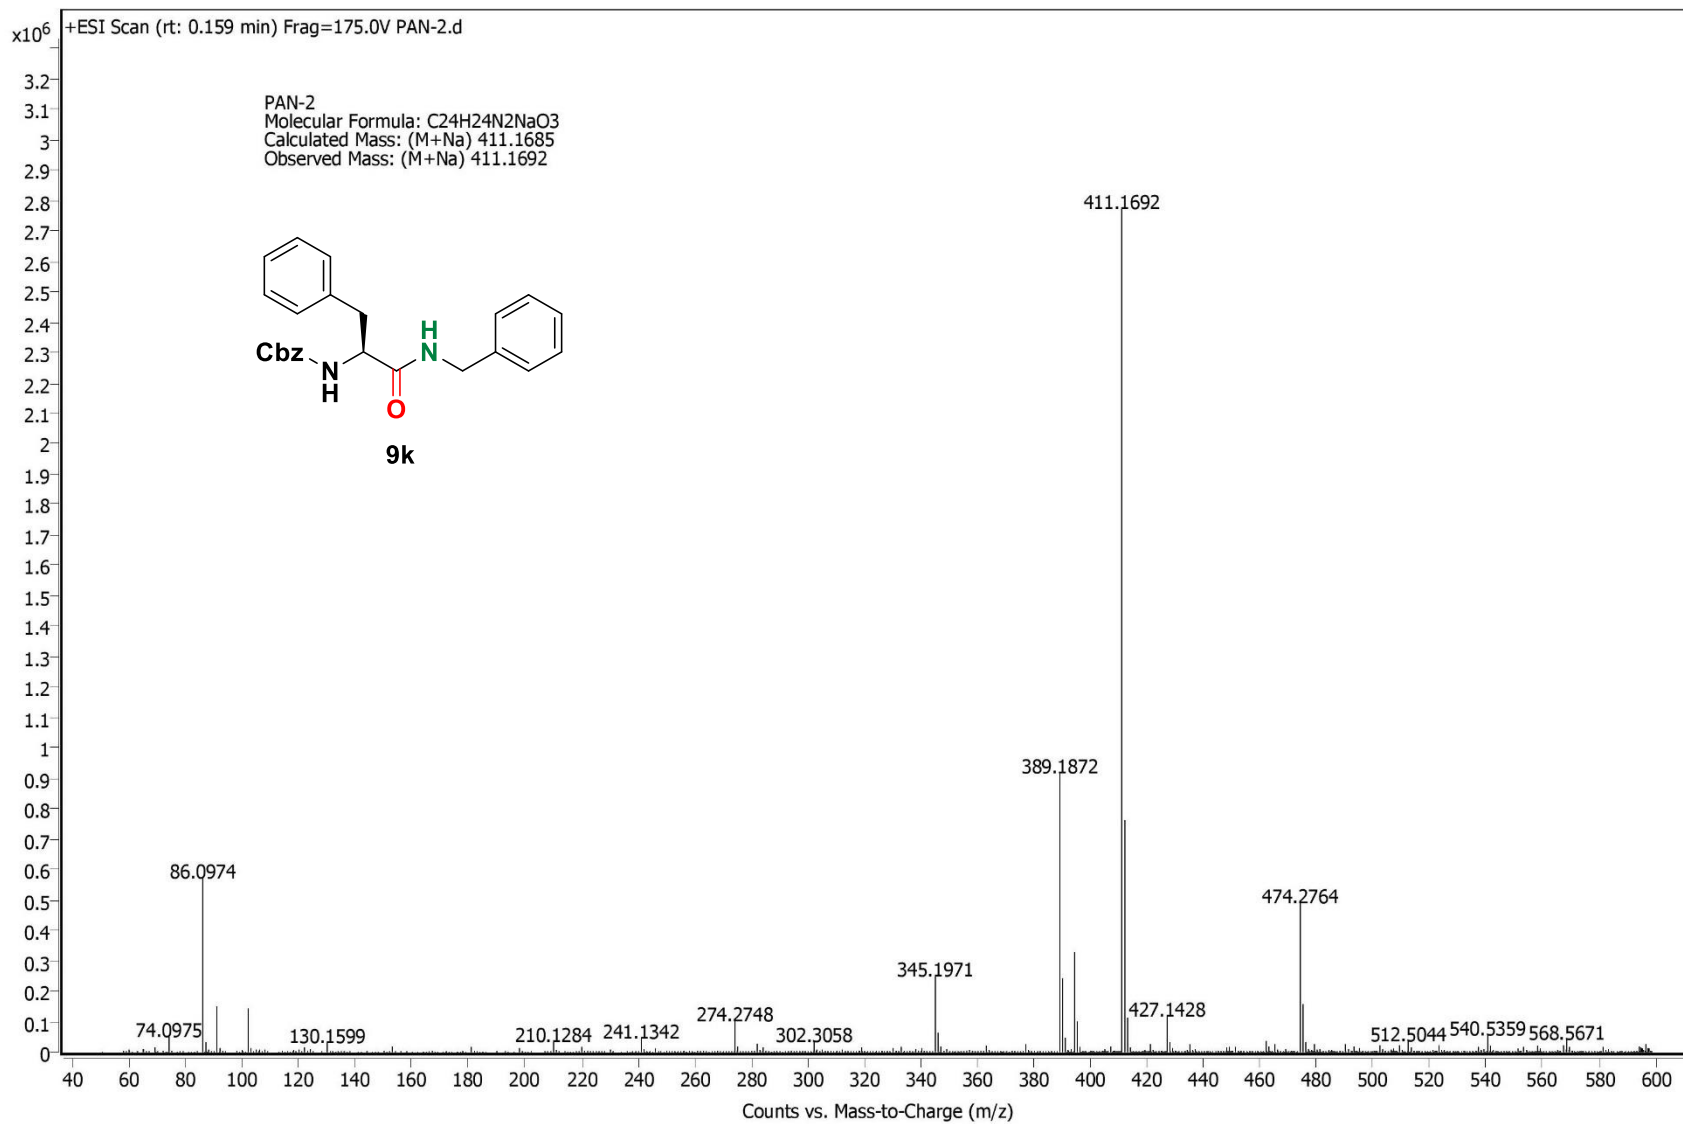

**Figure S115.** HRMS Spectrum of **9k**

AC-3 1H NMR

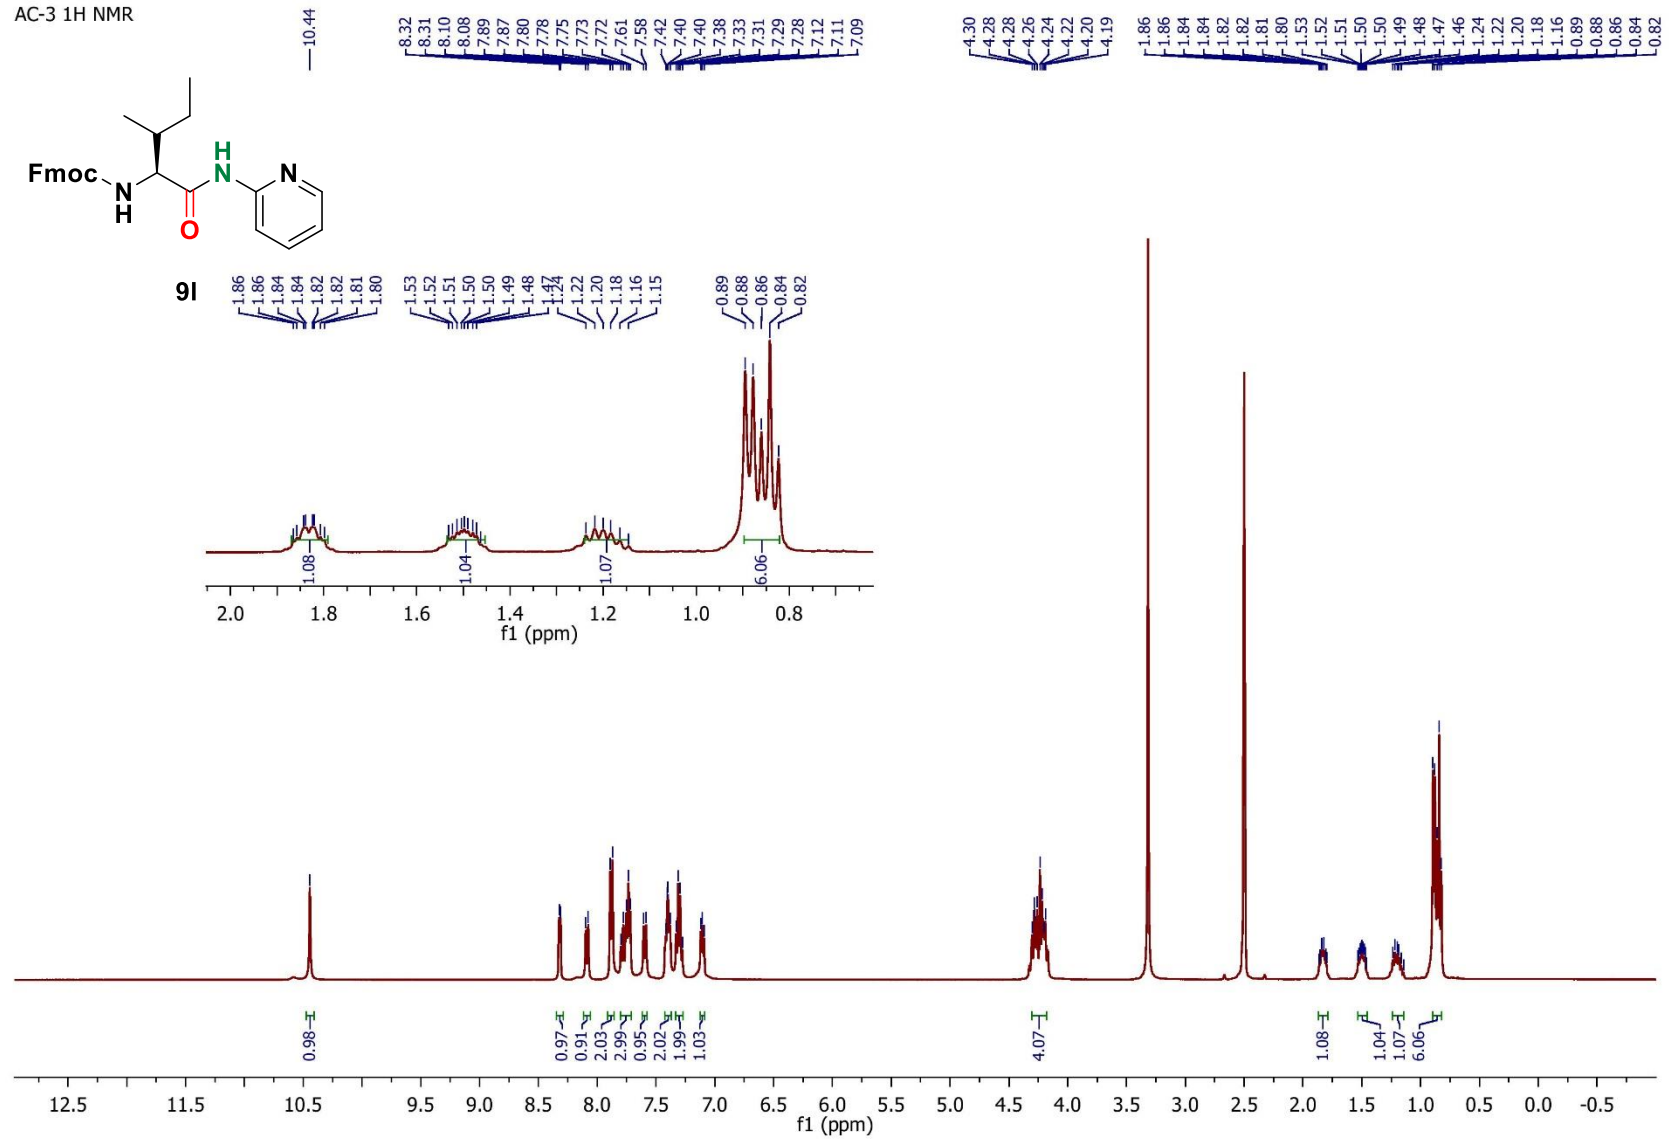

Figure S116. <sup>1</sup>H NMR Spectrum of 9l(400MHz, DMSO-d<sub>6</sub>)

AC-3 13C NMR

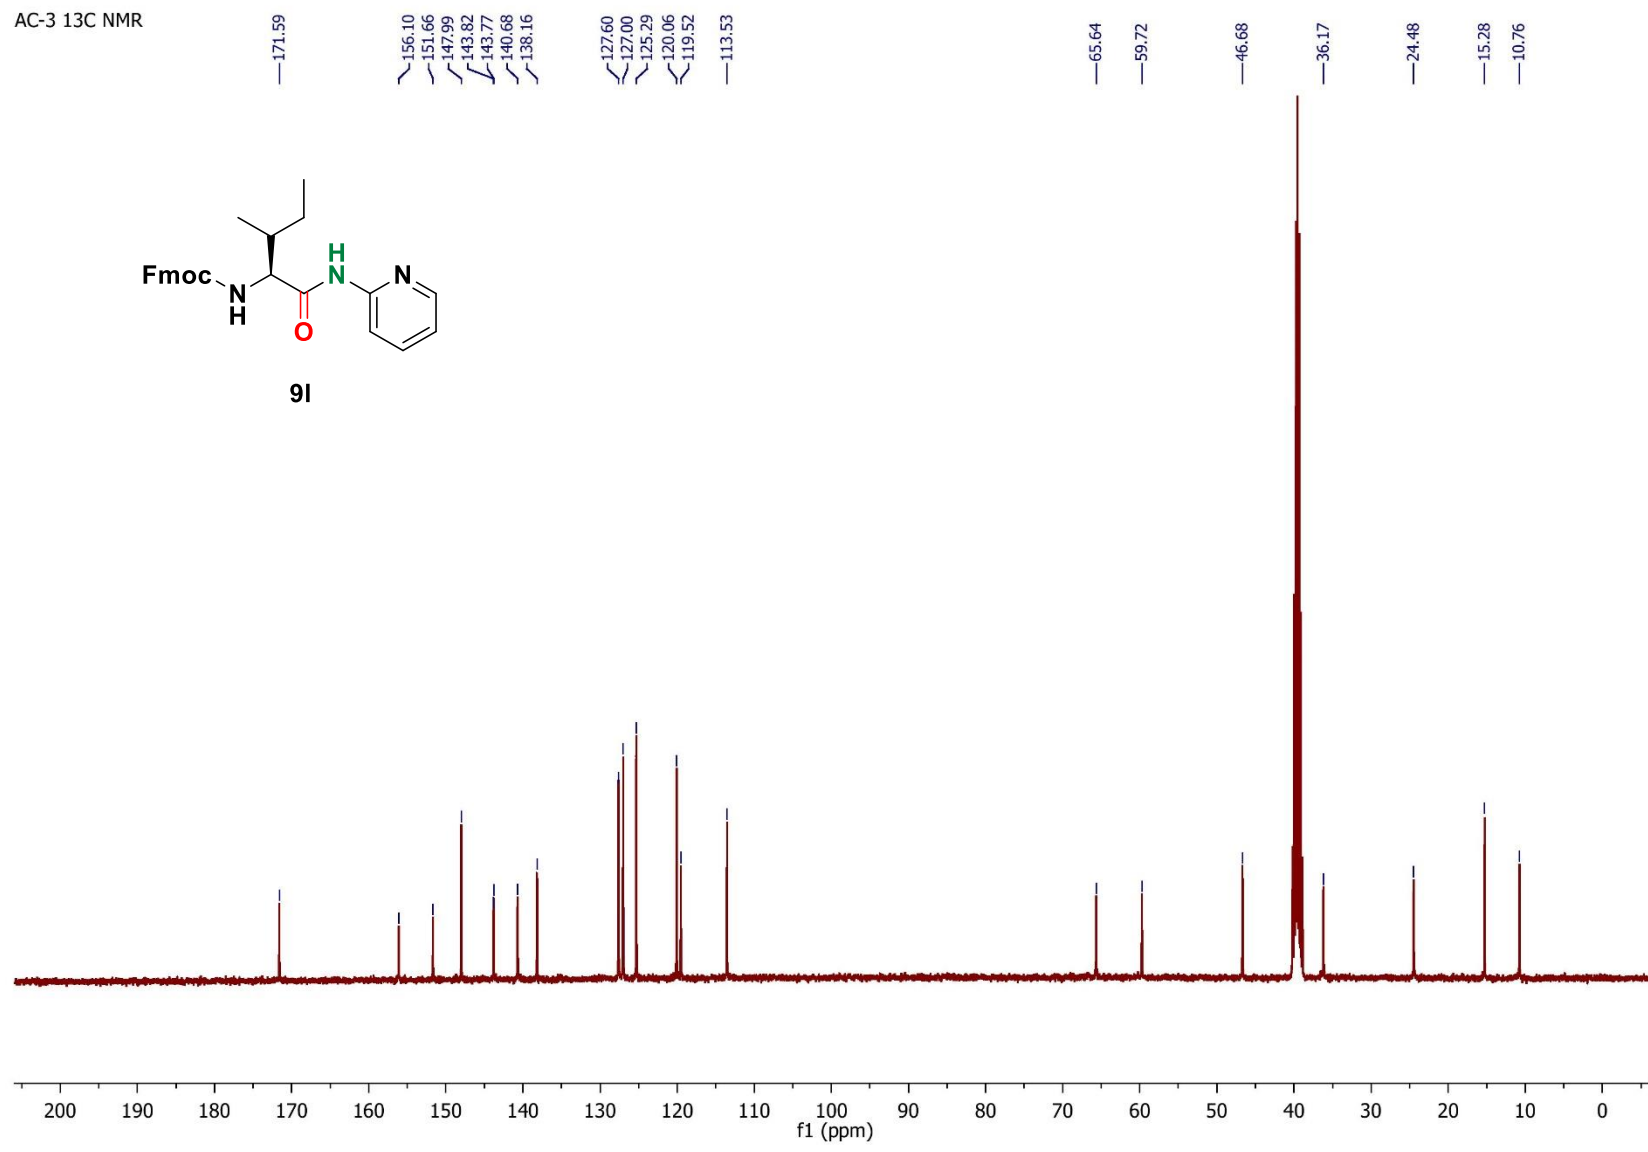

Figure S117. <sup>13</sup>C NMR Spectrum of **9l** (101MHz, DMSO-d<sub>6</sub>)

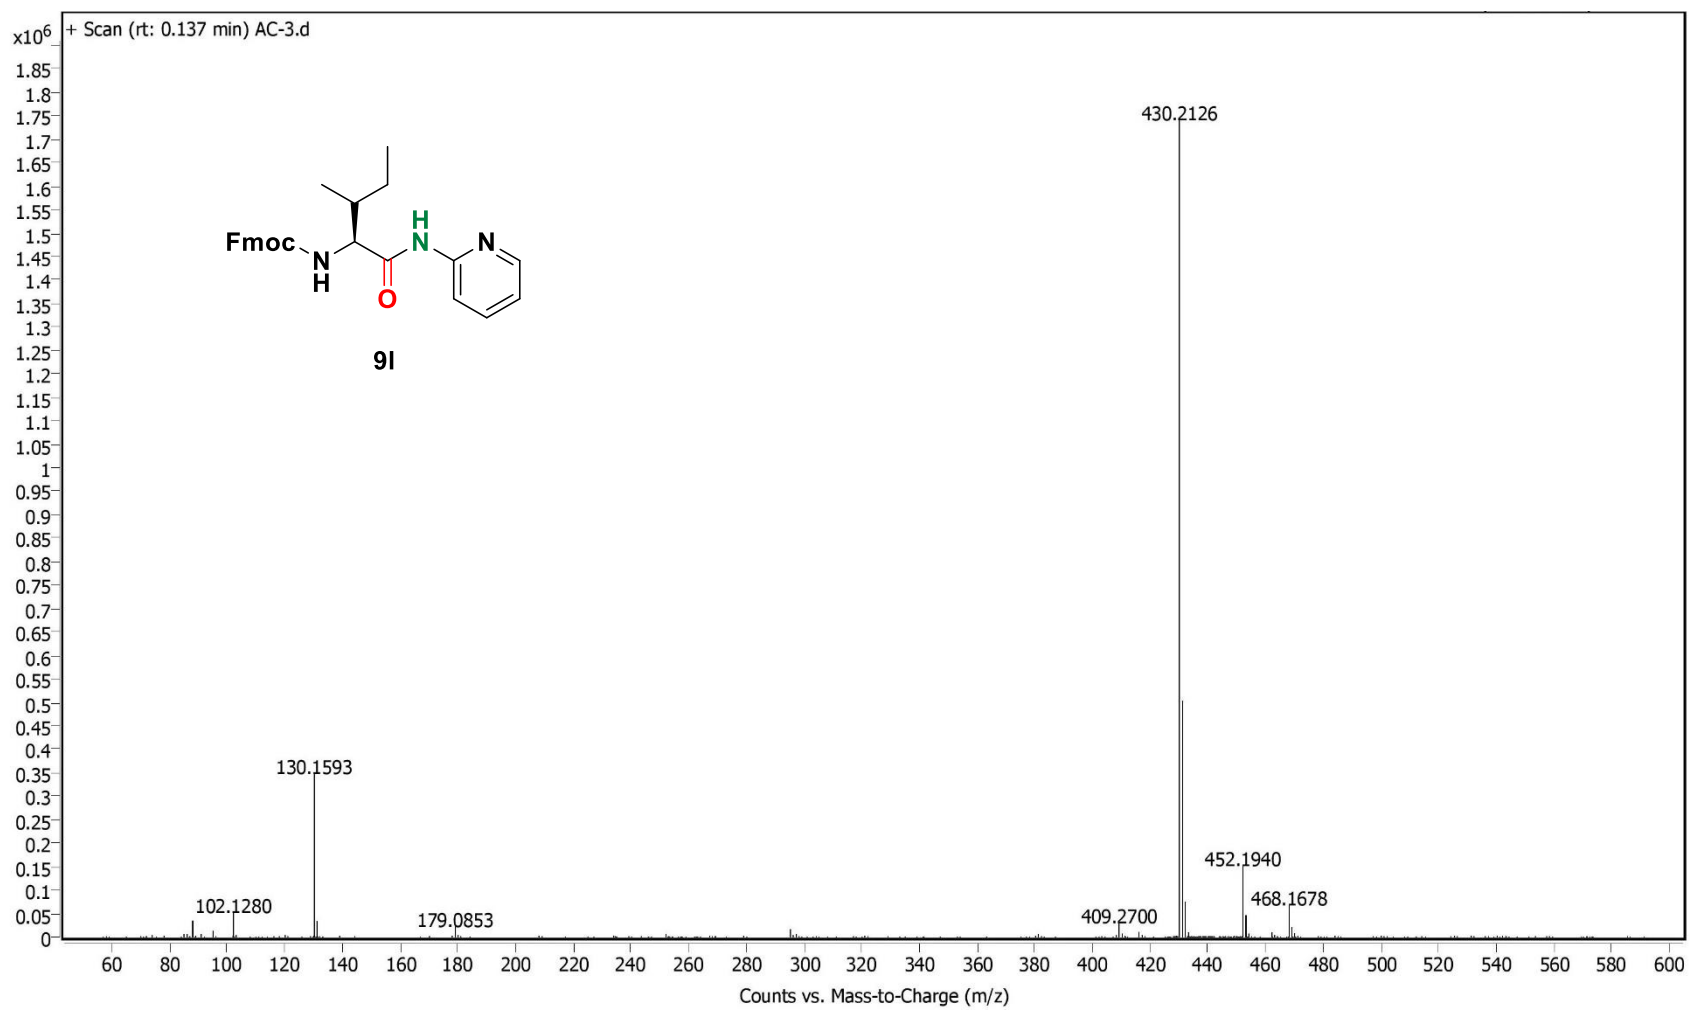

**Figure S118.** HRMS Spectrum of **9l**

AC-5 1H NMR

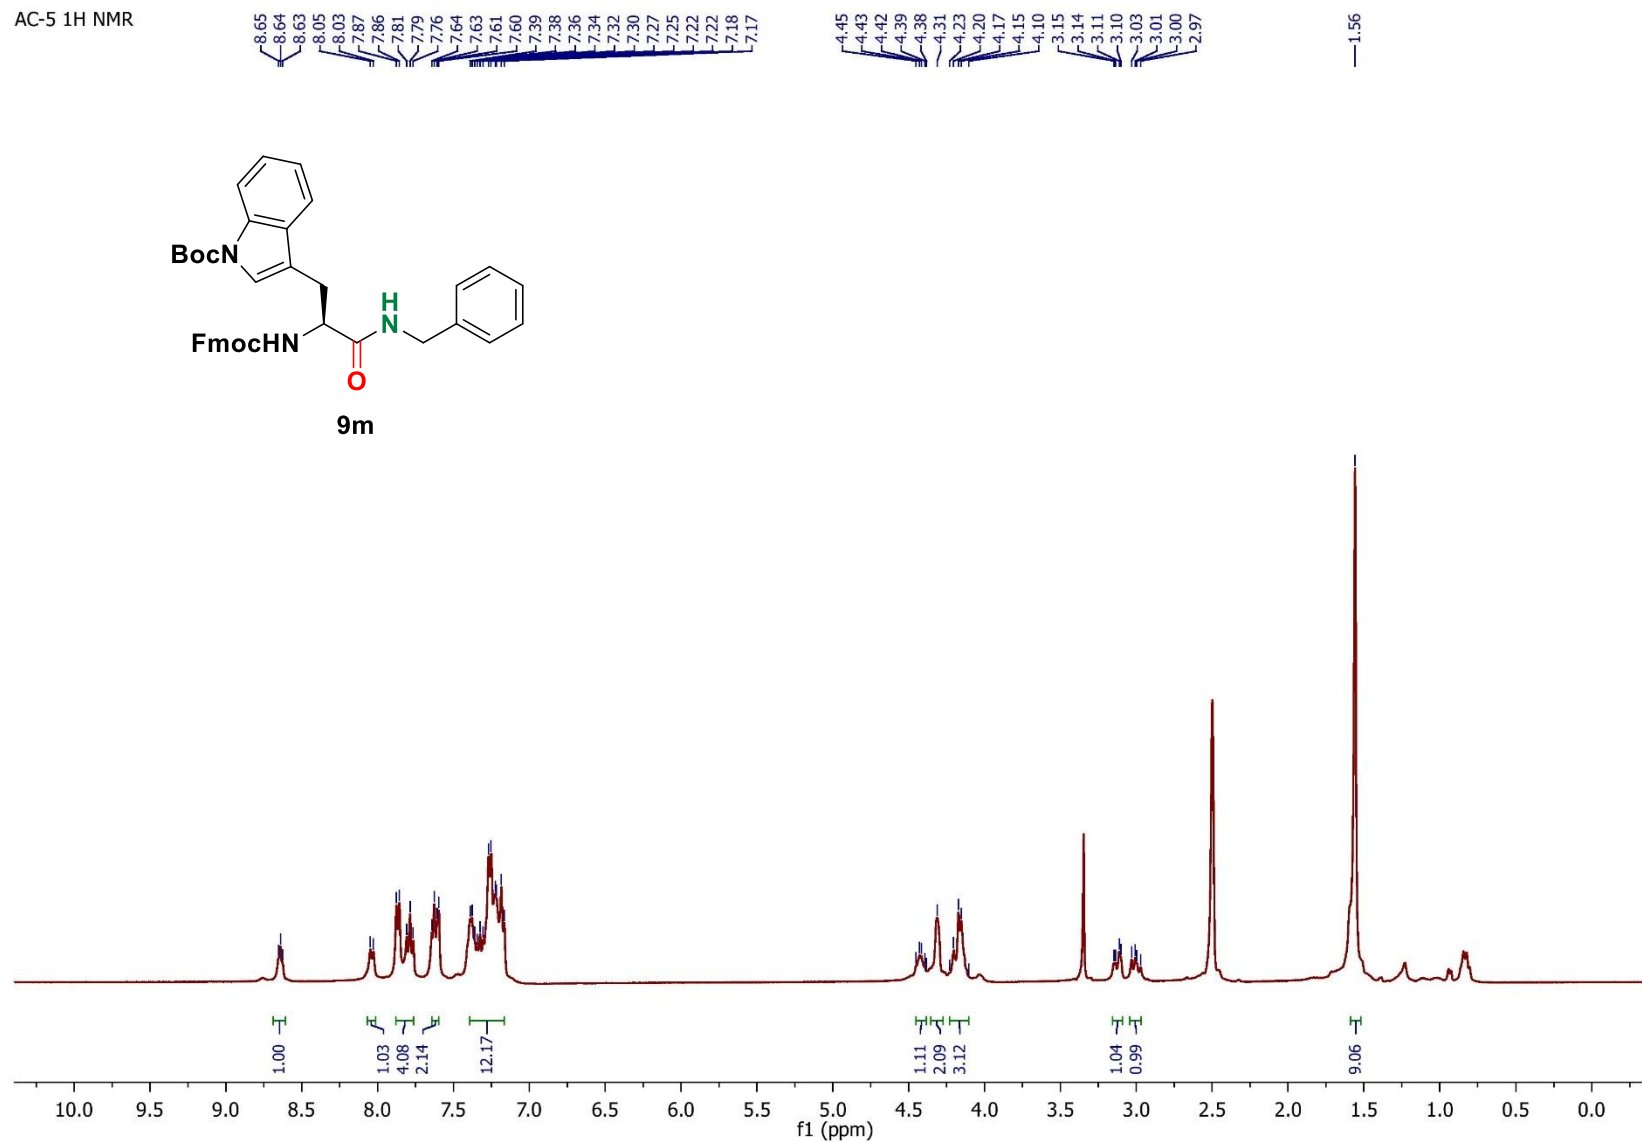

Figure S119. <sup>1</sup>H NMR Spectrum of **9m** (400MHz, DMSO-d<sub>6</sub>)

AC-5 13C NMR

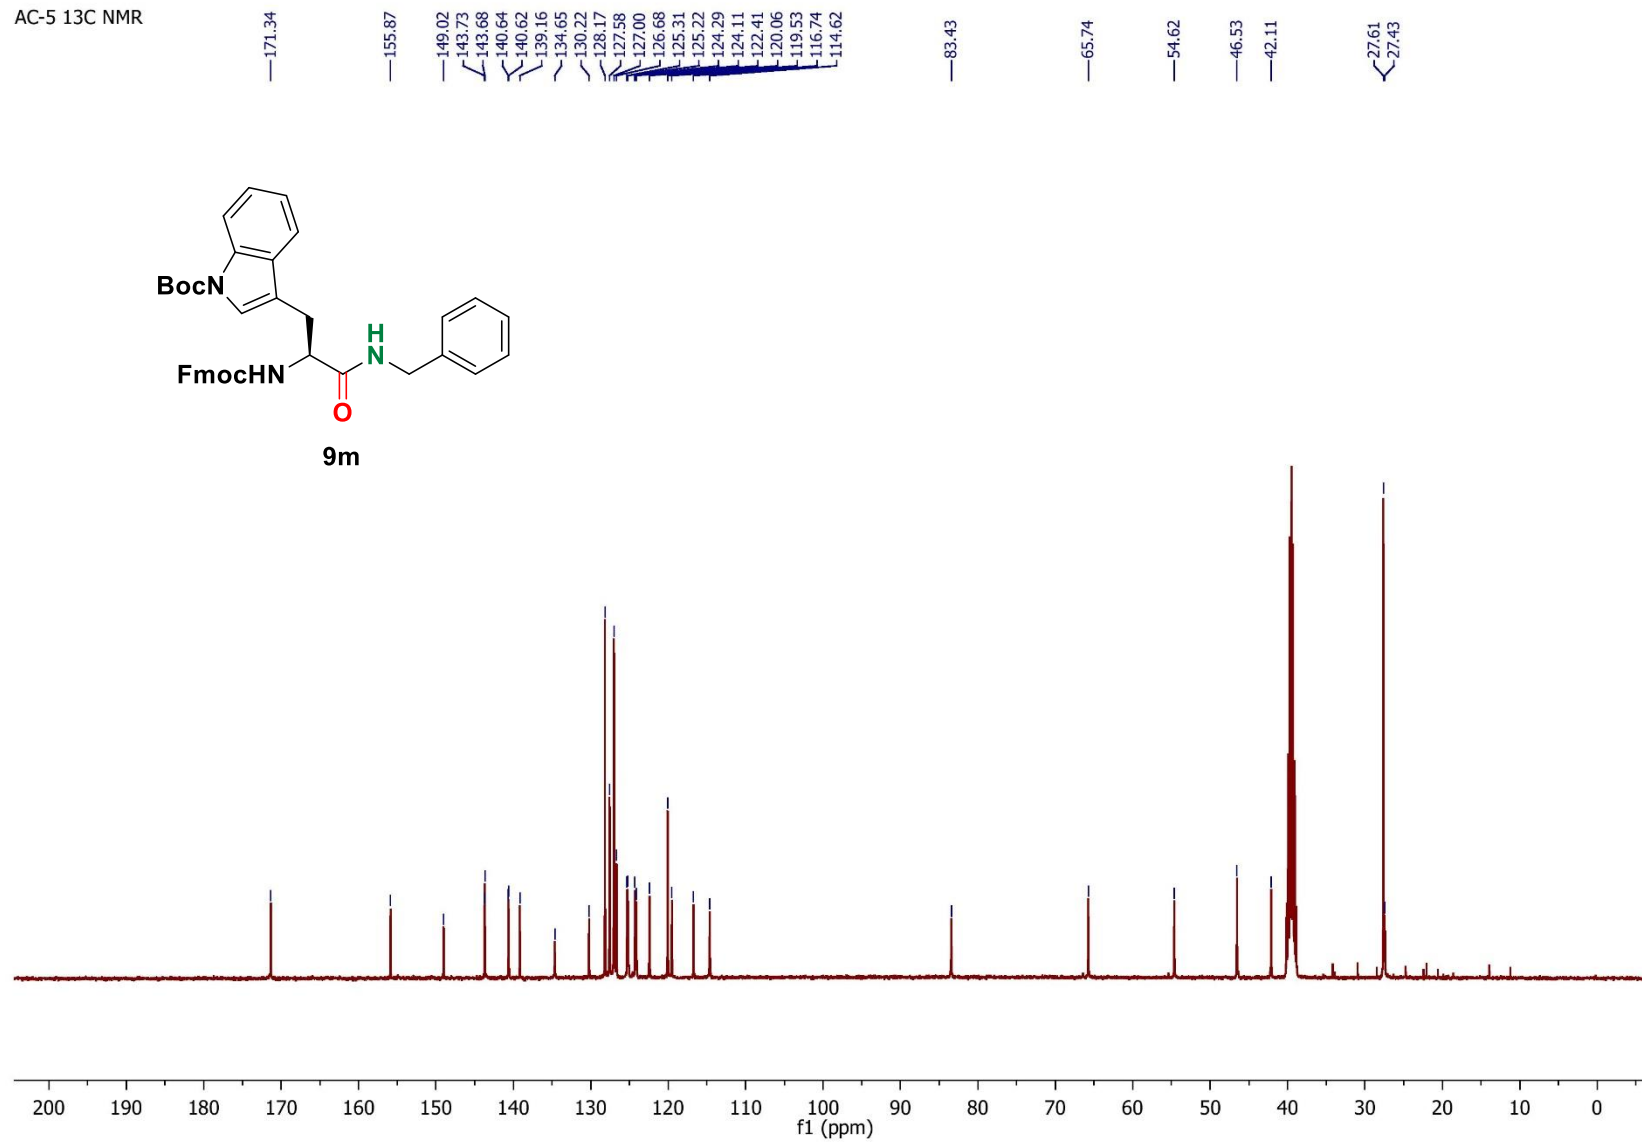

Figure S120. <sup>13</sup>C NMR Spectrum of **9m** (101MHz, DMSO-d<sub>6</sub>)

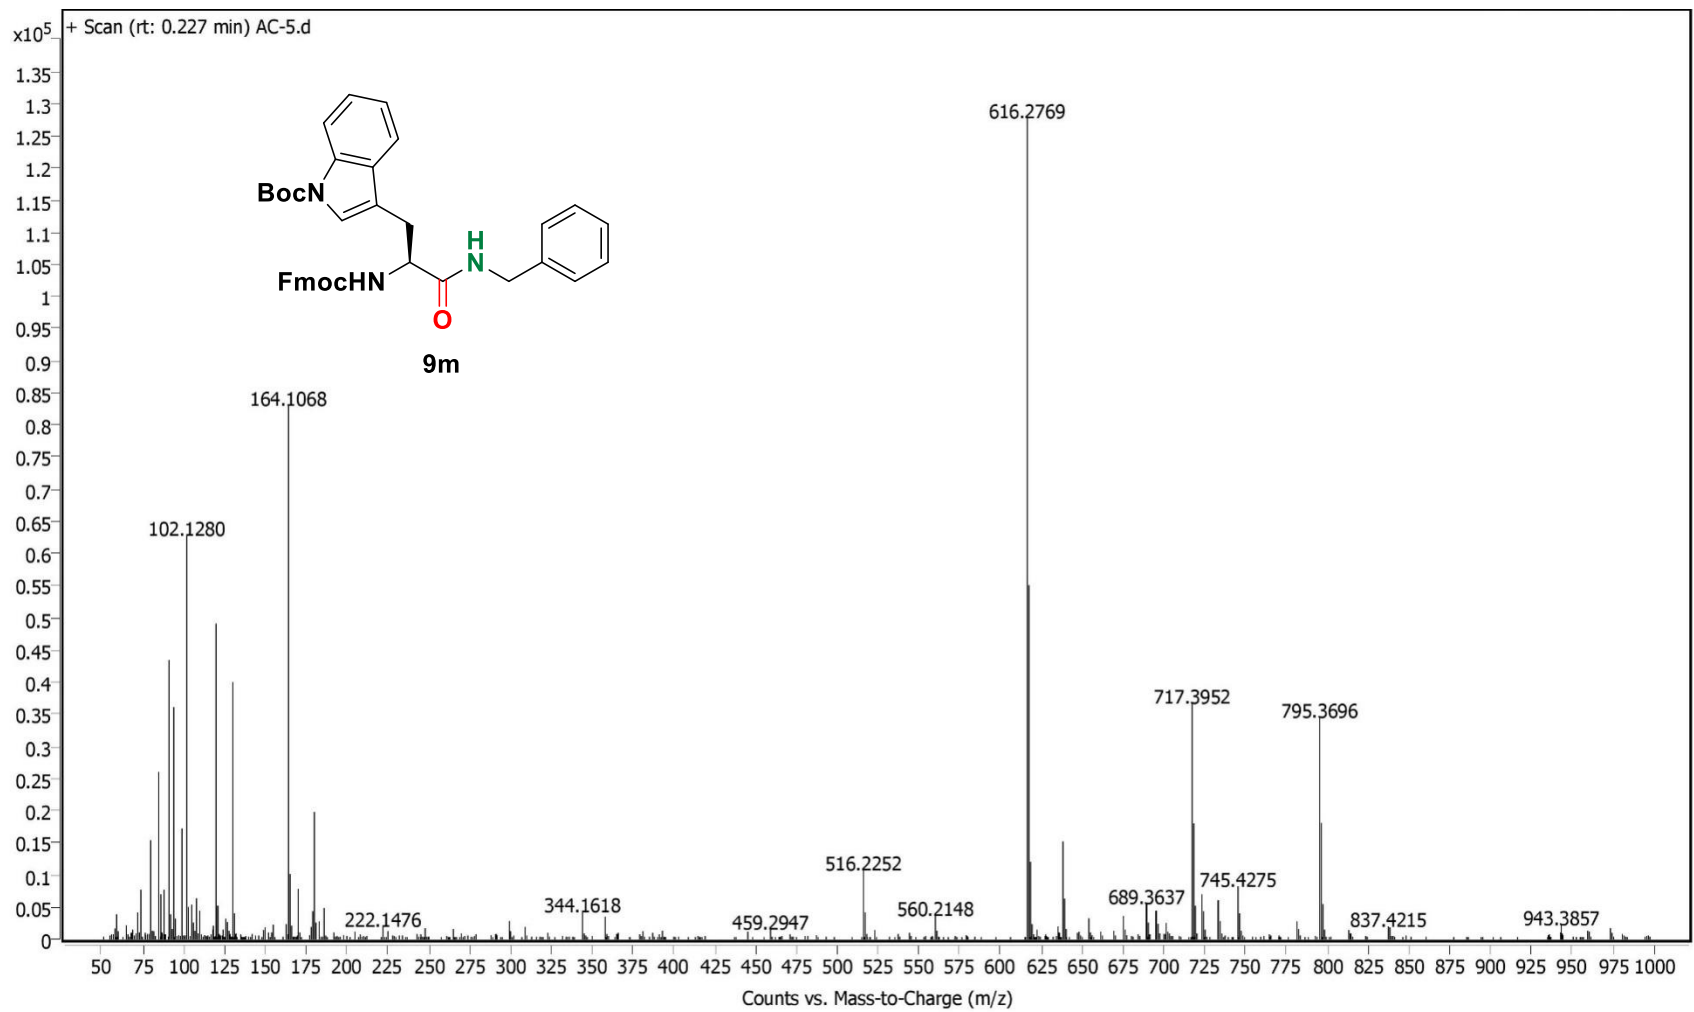

**Figure S121.** HRMS Spectrum of **9m**



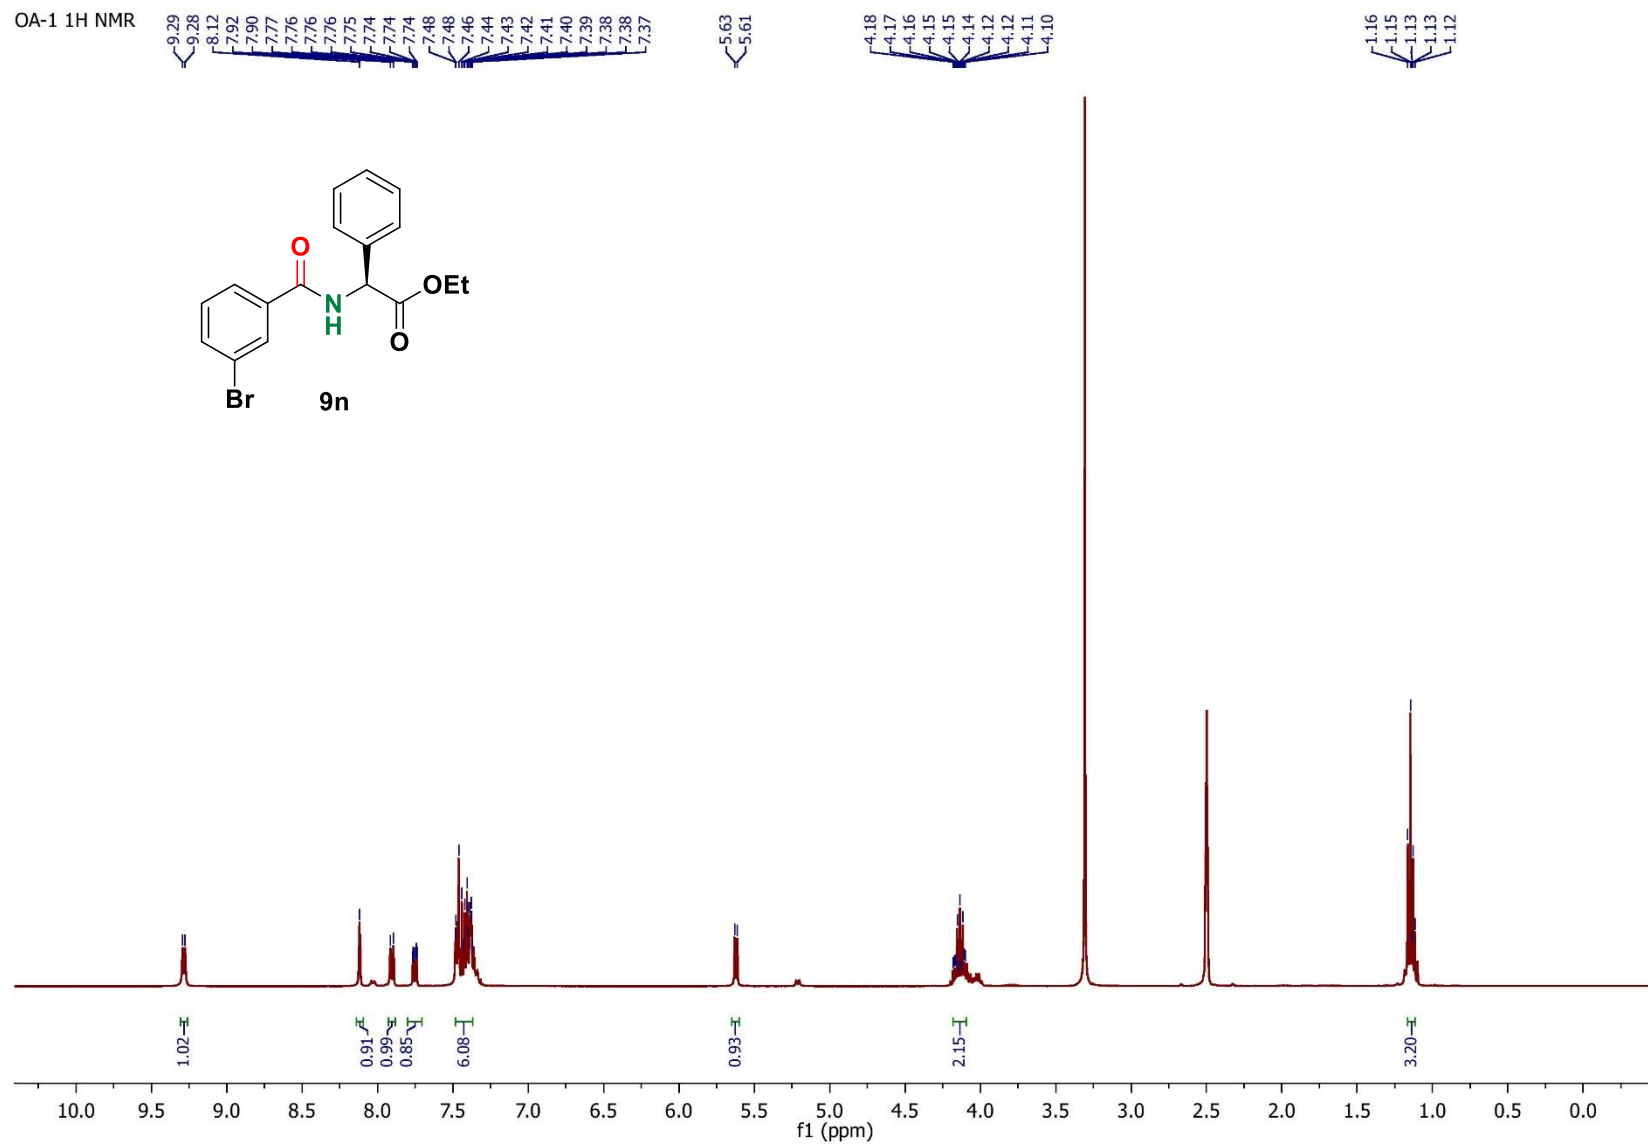

Figure S122. <sup>1</sup>H NMR Spectrum of **9n** (400MHz, DMSO-d<sub>6</sub>)

OA-1 13C NMR

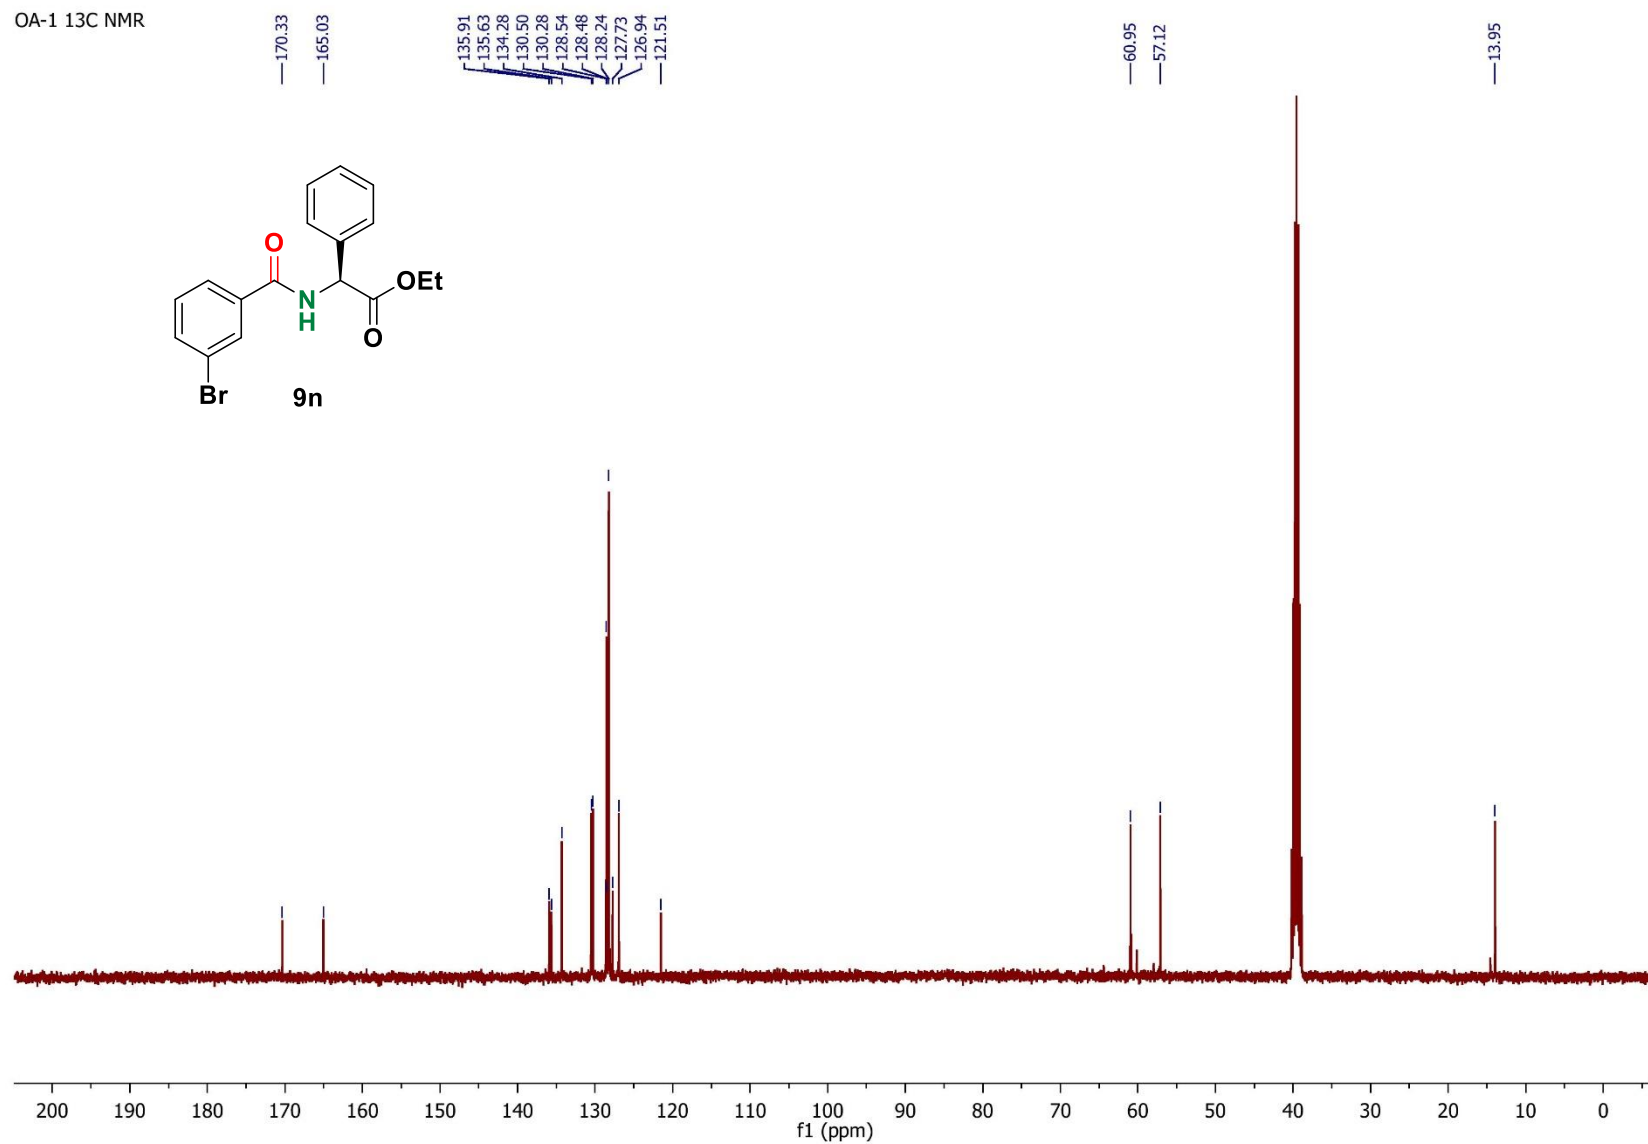

Figure S123.  $^{13}\text{C}$  NMR Spectrum of **9n** (101MHz, DMSO- $\text{d}_6$ )

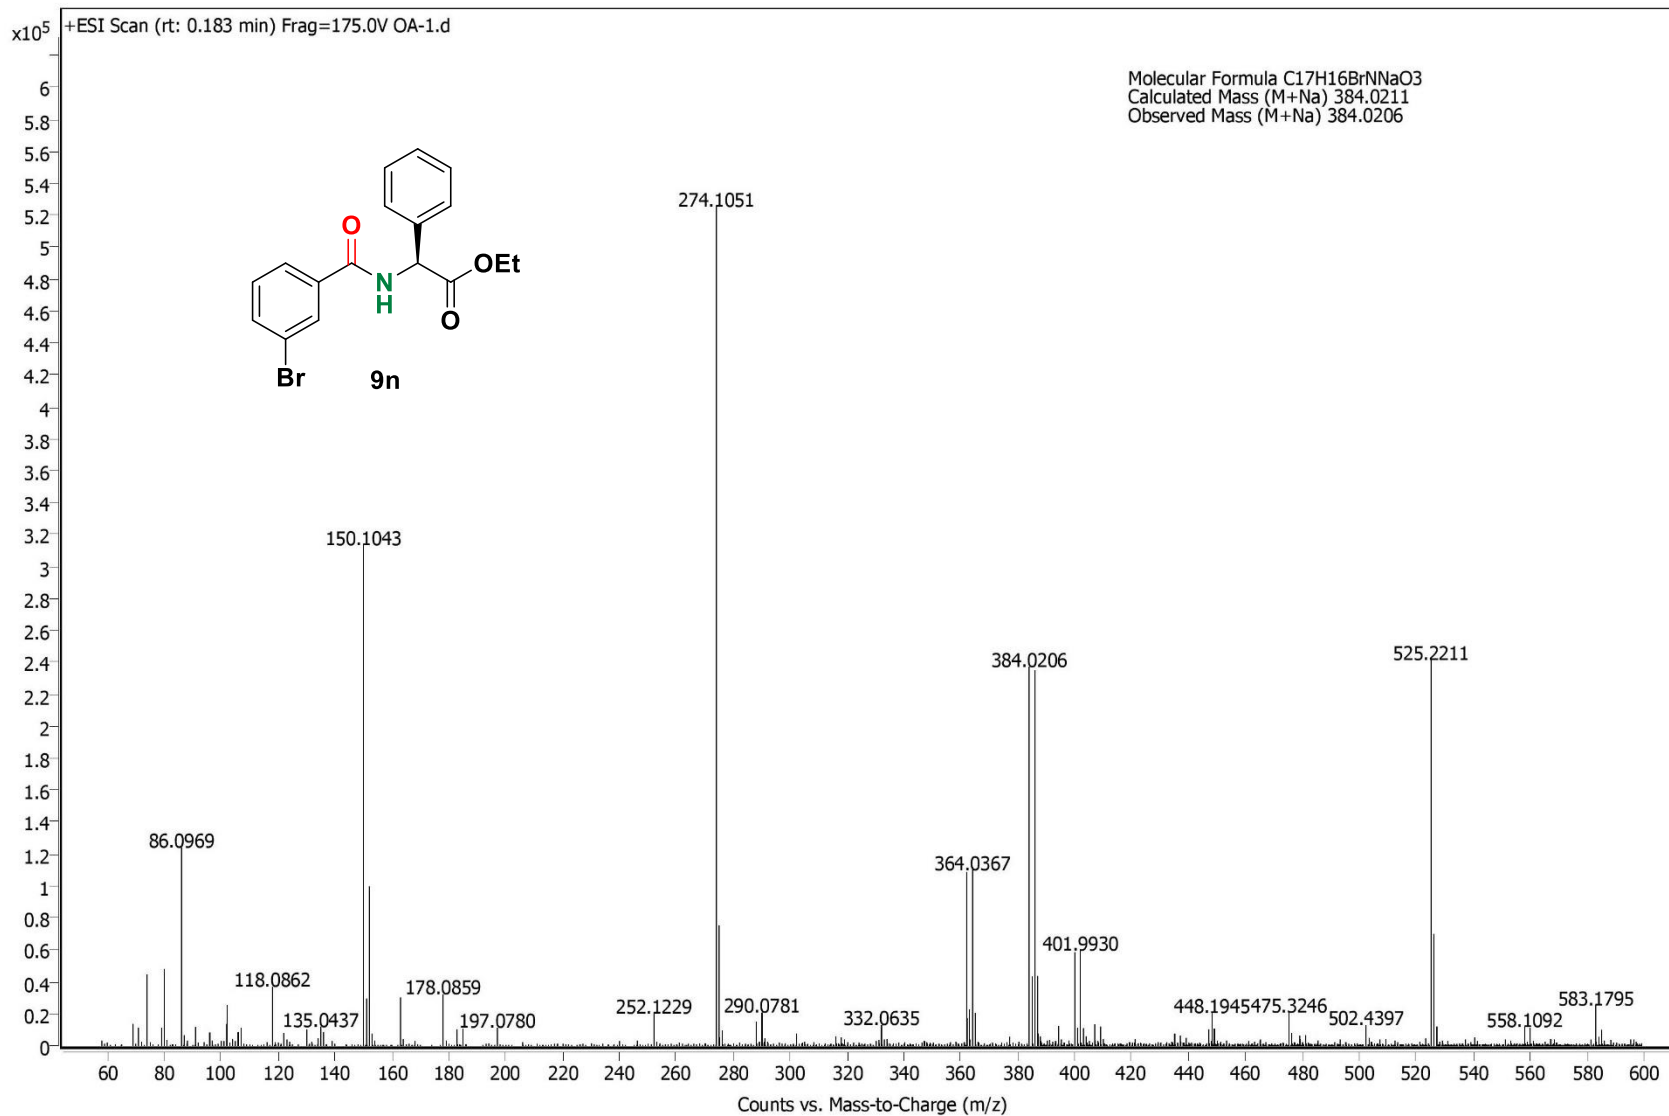

**Figure S124.** HRMS Spectrum of **9n**

PAC-3 1H NMR

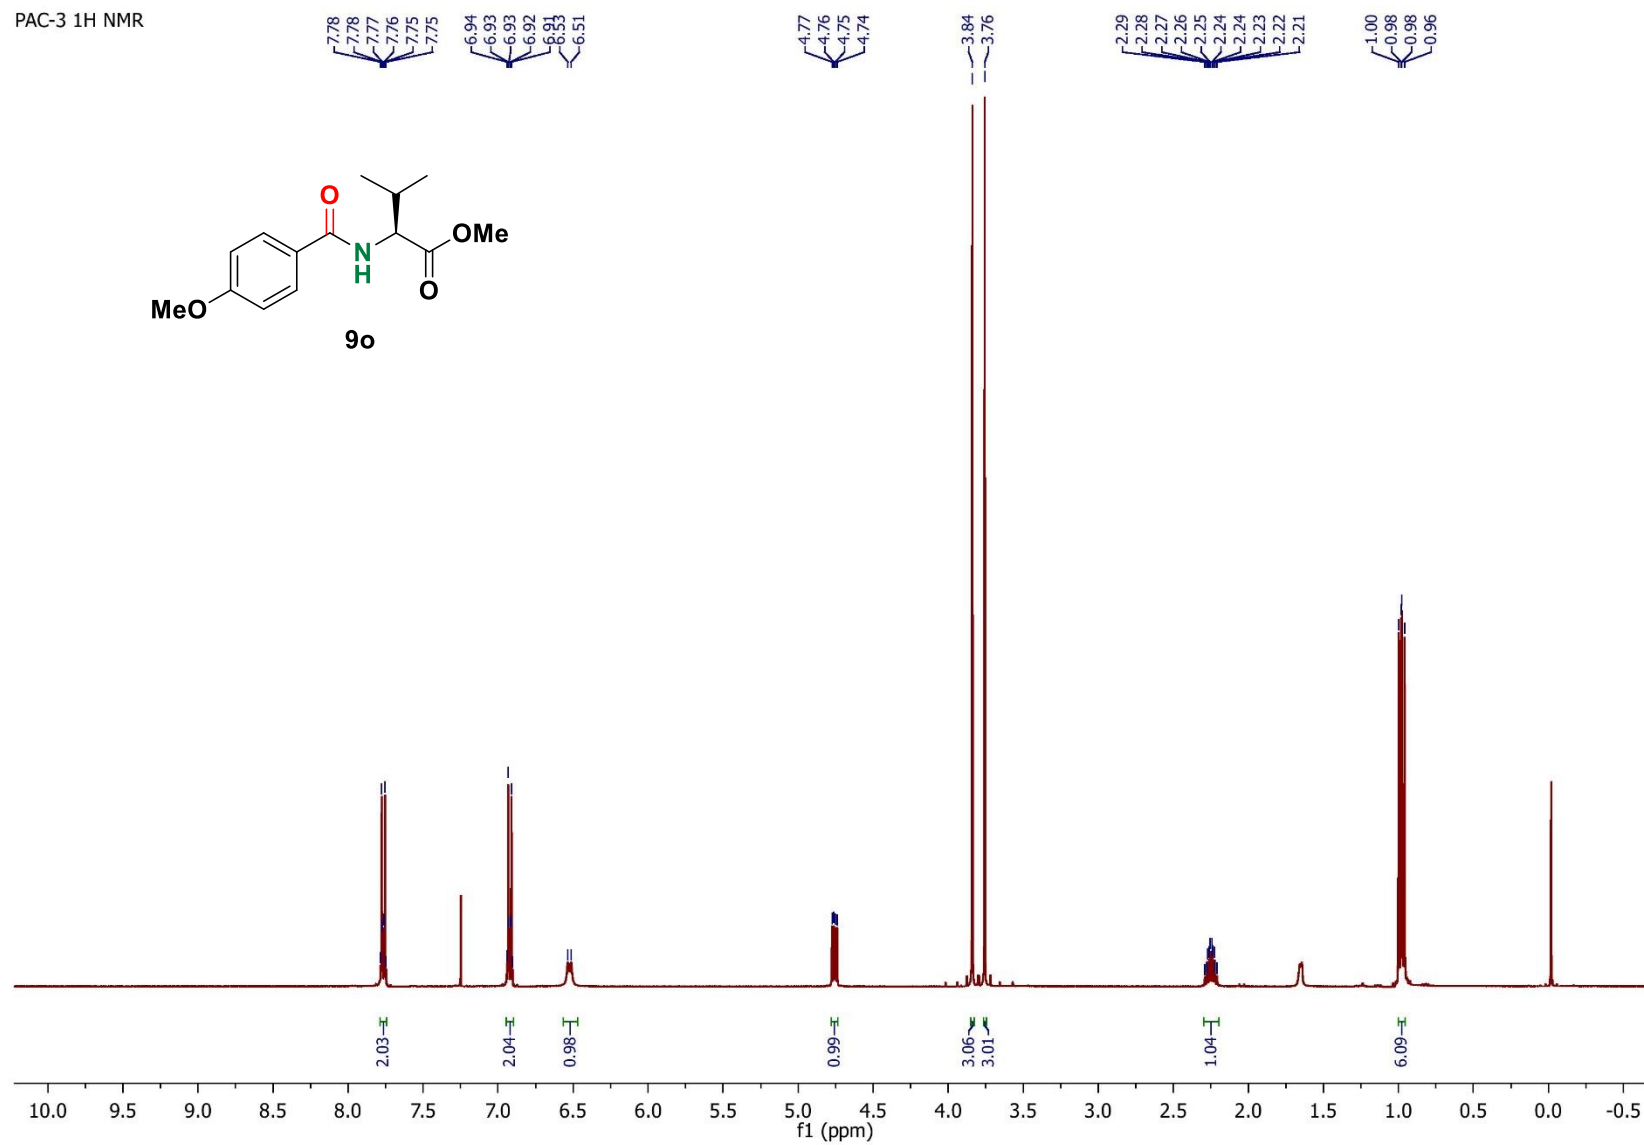

Figure S125. <sup>1</sup>H NMR Spectrum of **9o** (400MHz, CDCl<sub>3</sub>)

PAC-3 13C NMR

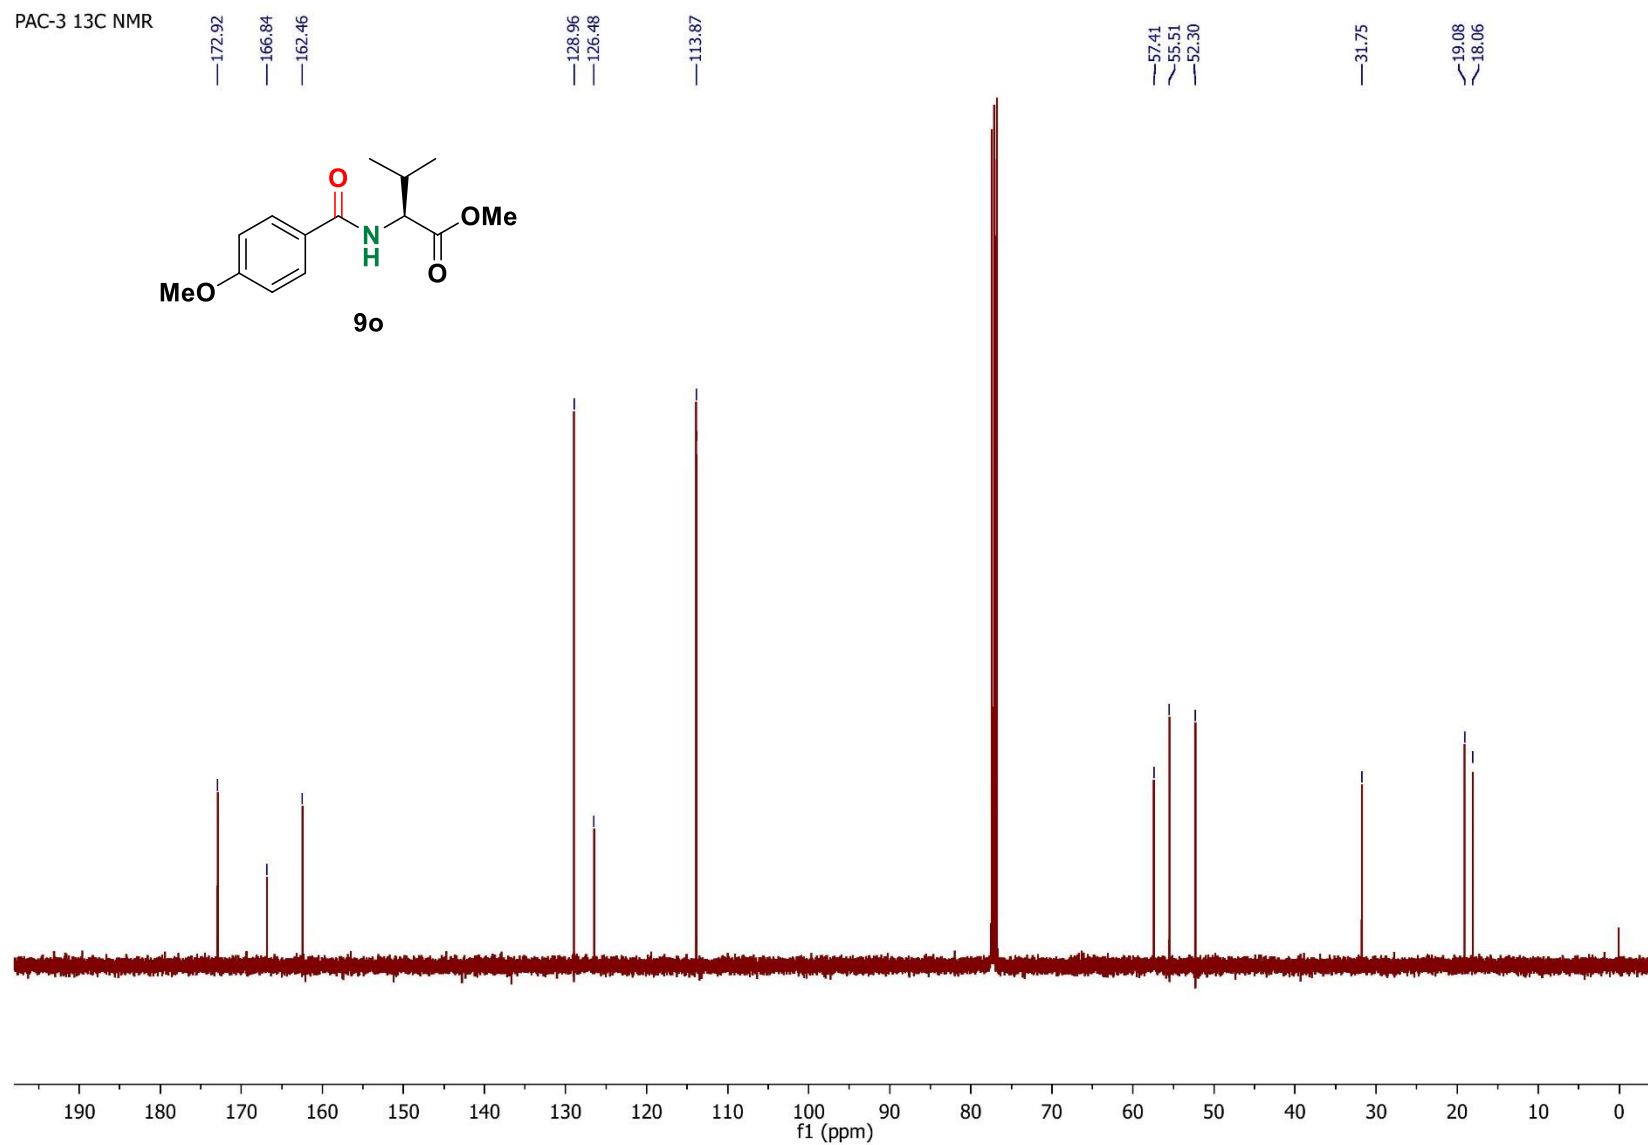

**Figure S126.**  $^{13}\text{C}$  NMR Spectrum of **9o** (101MHz,  $\text{CDCl}_3$ )

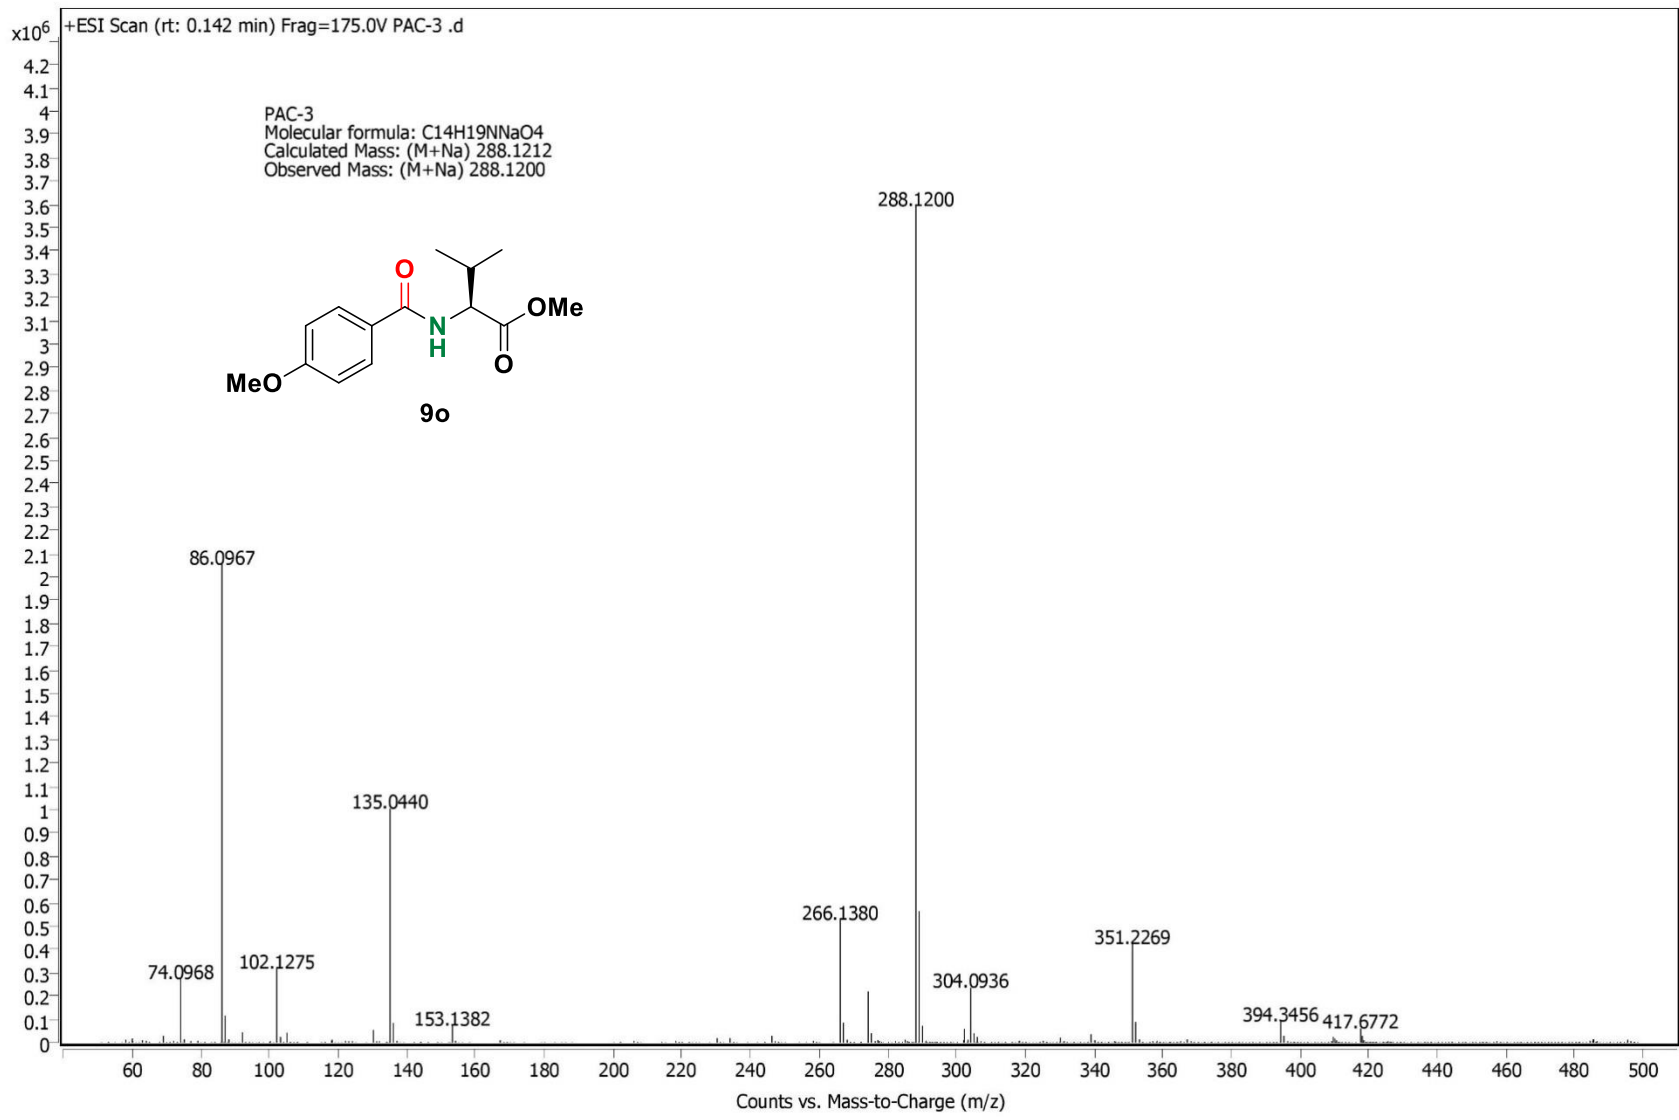

**Figure S127.** HRMS Spectrum of **9o**

OA-4 1H NMR

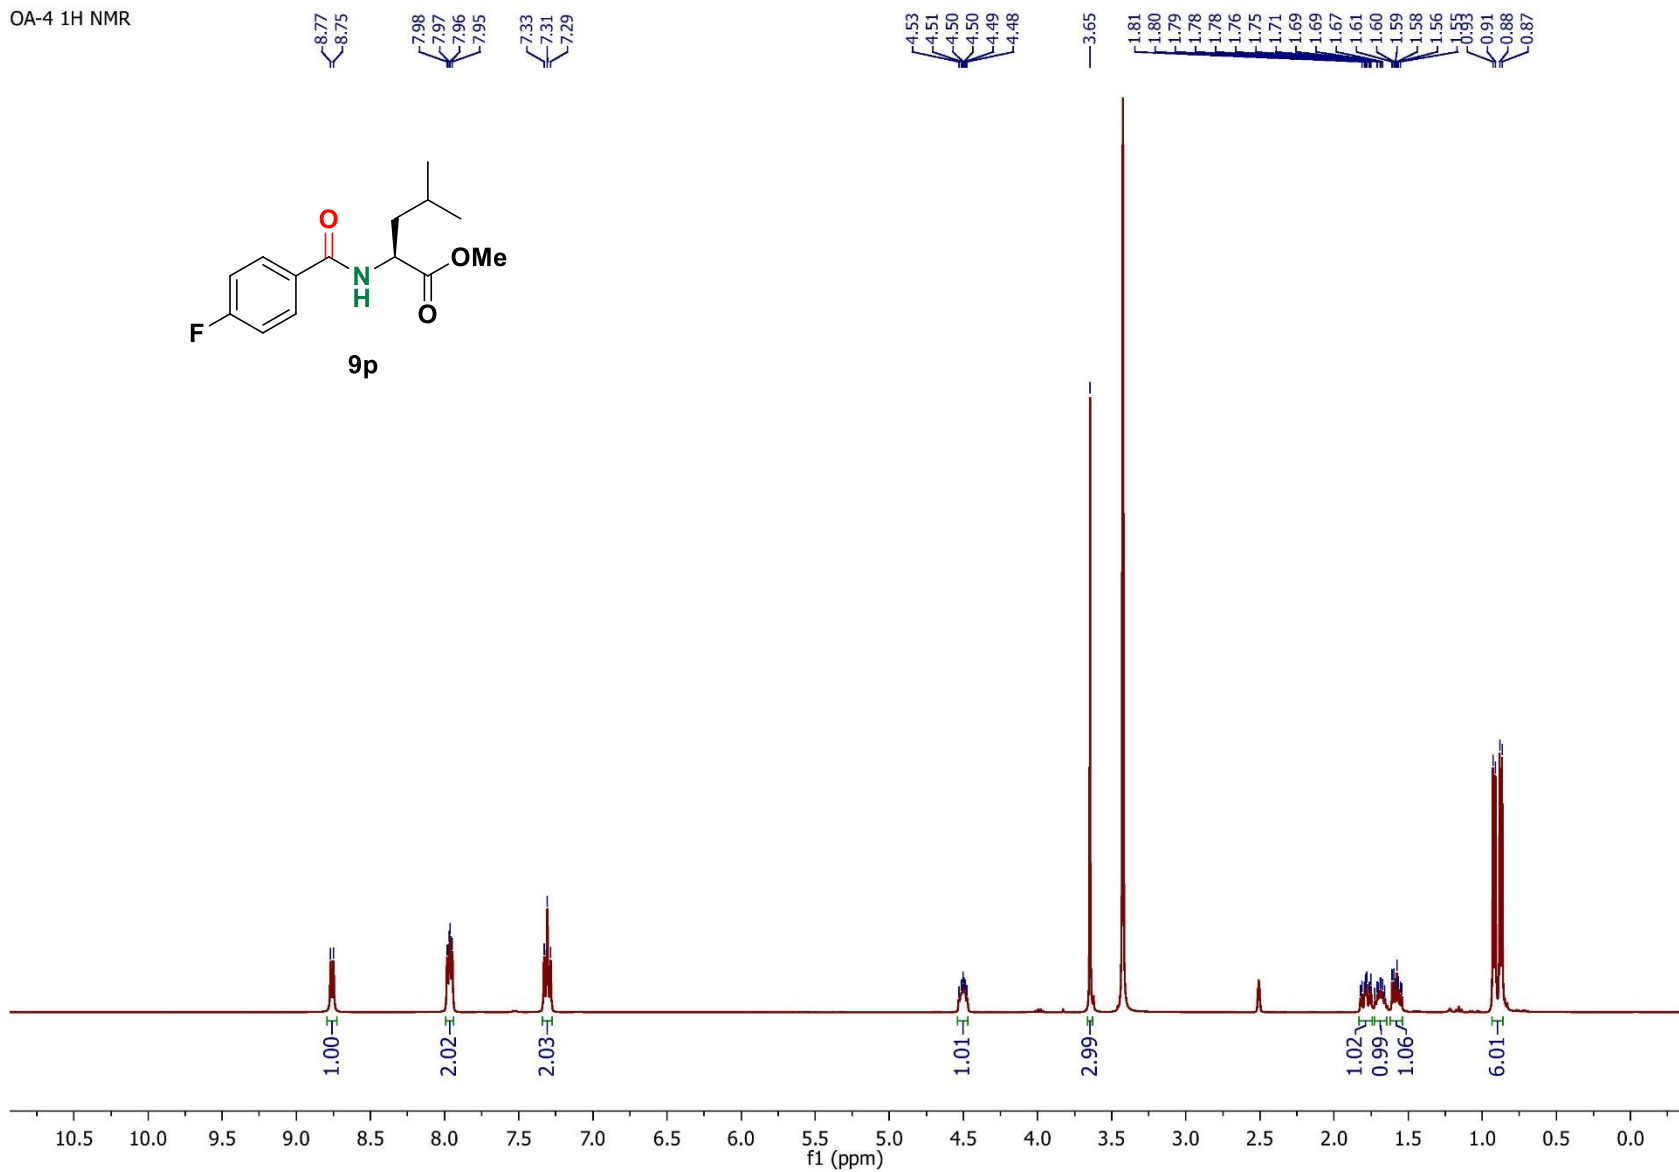

Figure S128. <sup>1</sup>H NMR Spectrum of 9p (400MHz, DMSO-d<sub>6</sub>)

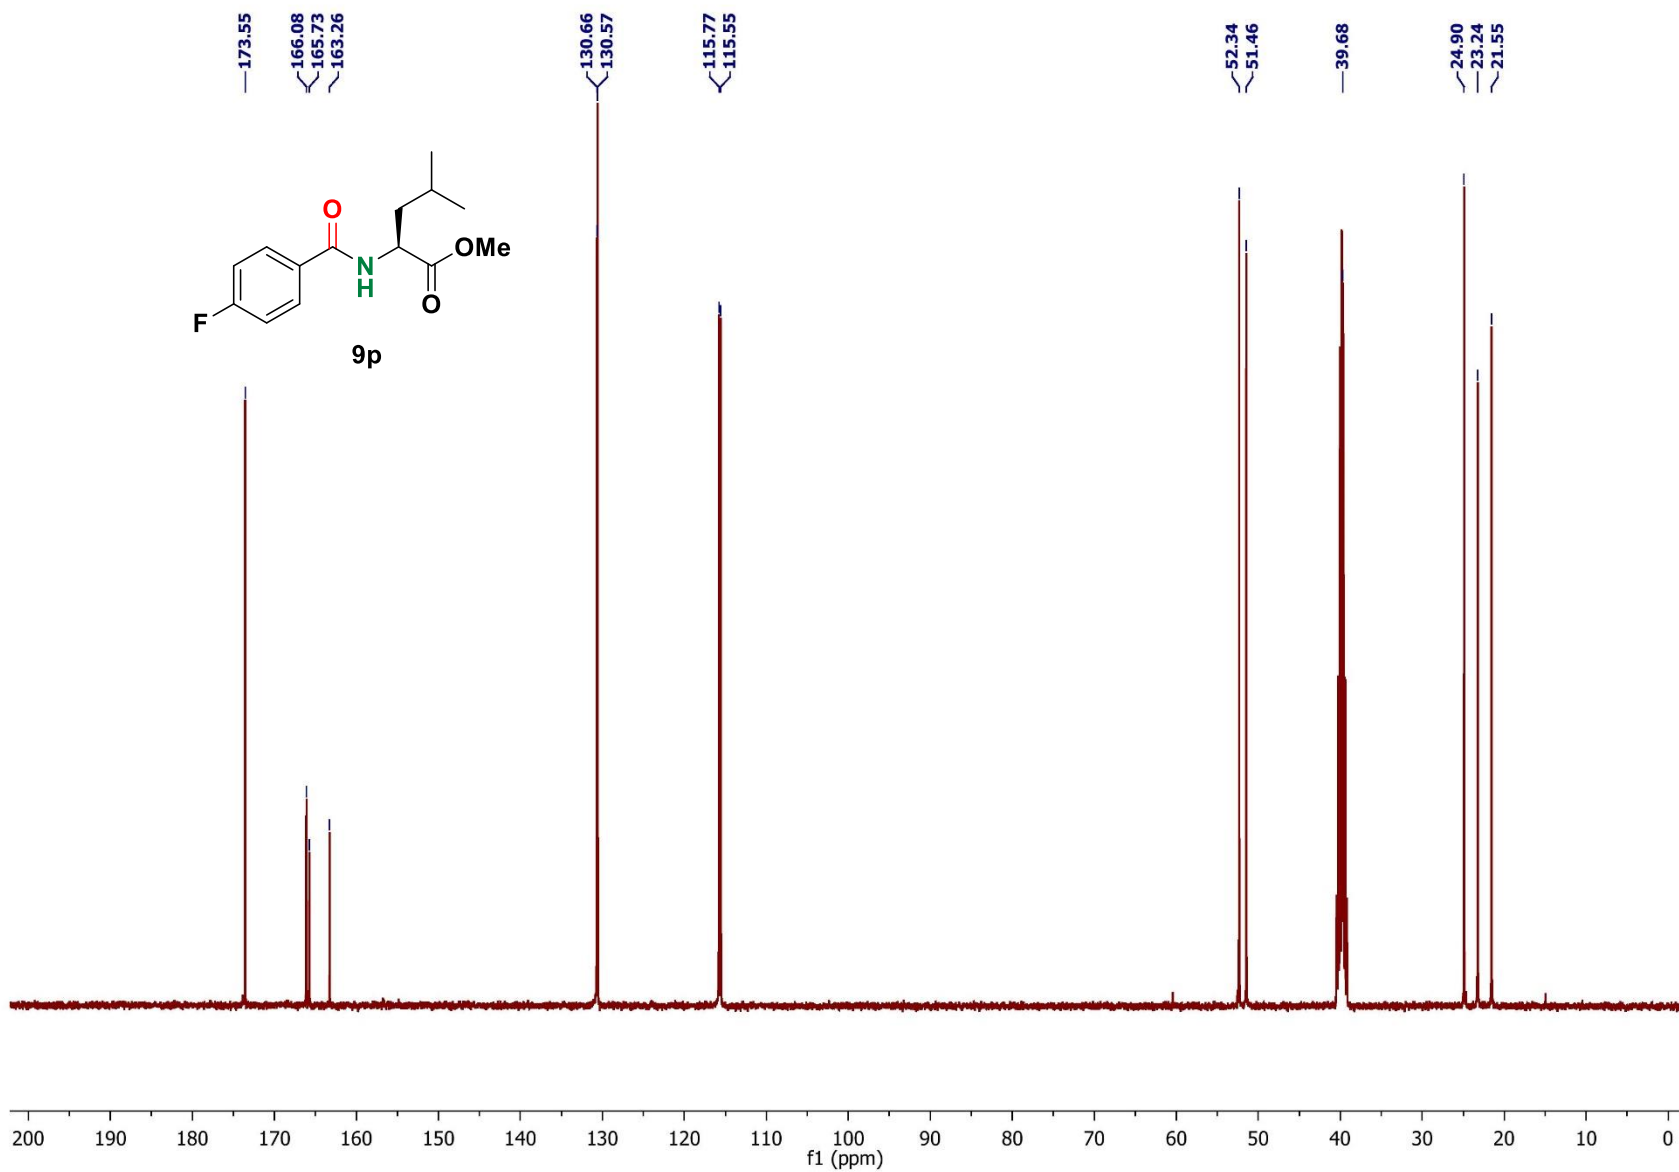

Figure S129. <sup>13</sup>C NMR Spectrum of 9p (101MHz, DMSO-d<sub>6</sub>)



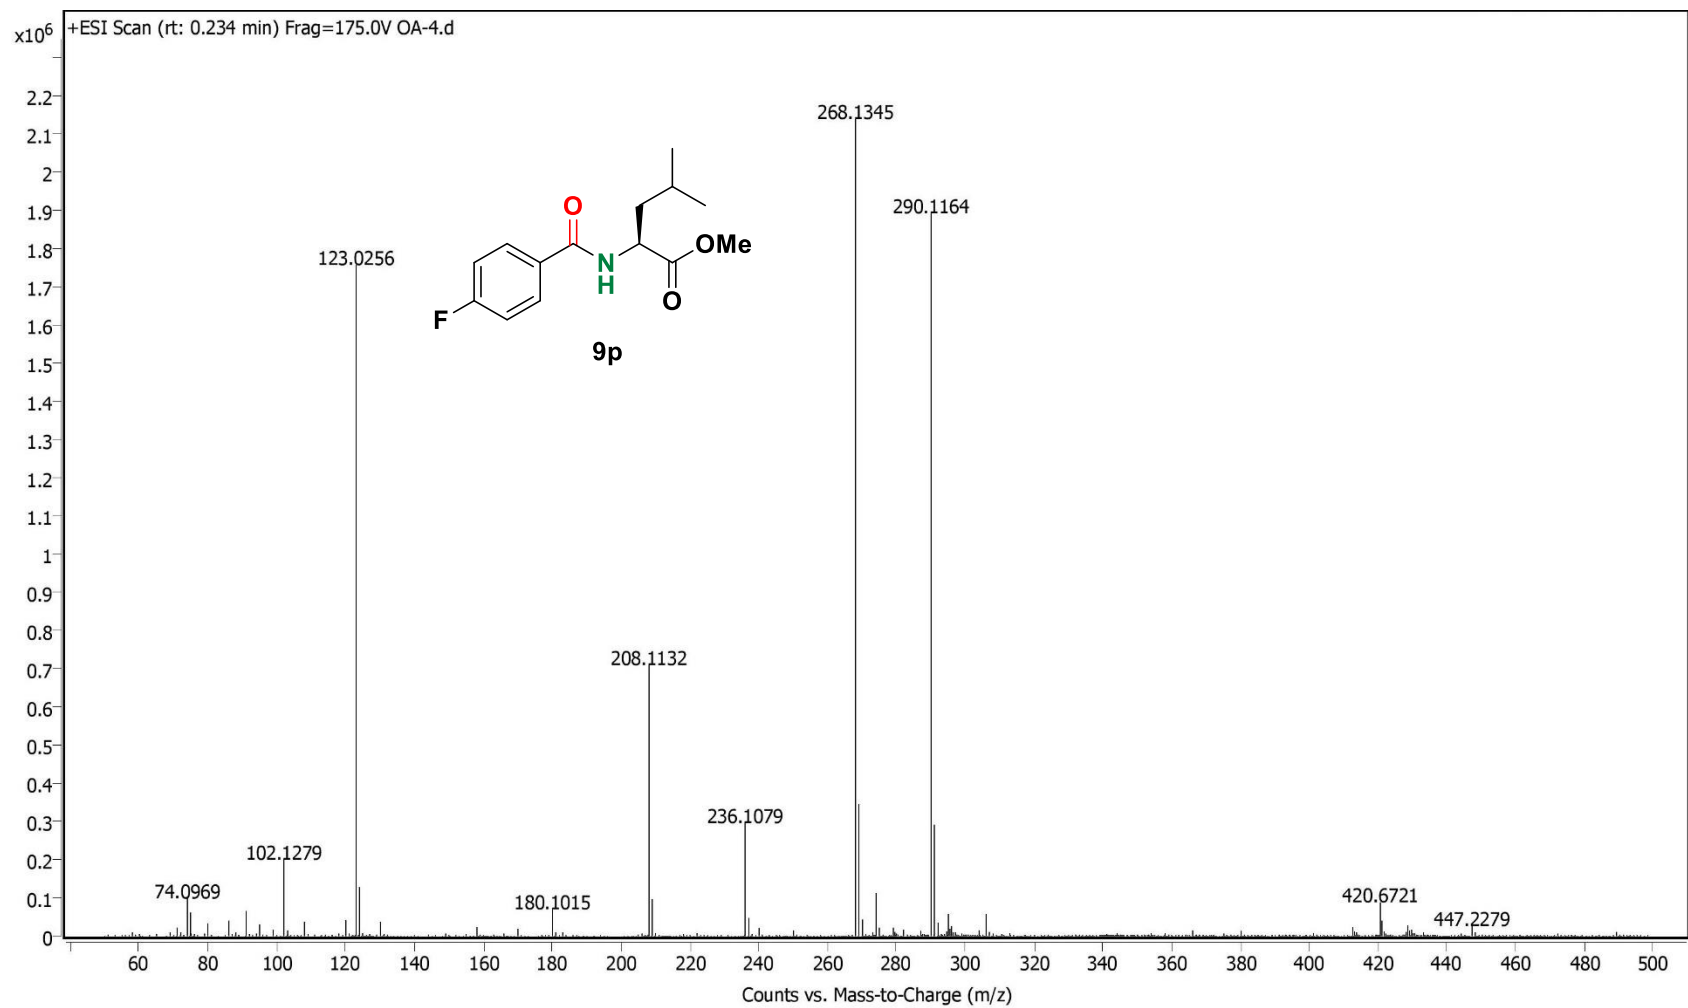

**Figure S130.** HRMS Spectrum of **9p**

OA-14 1H NMR

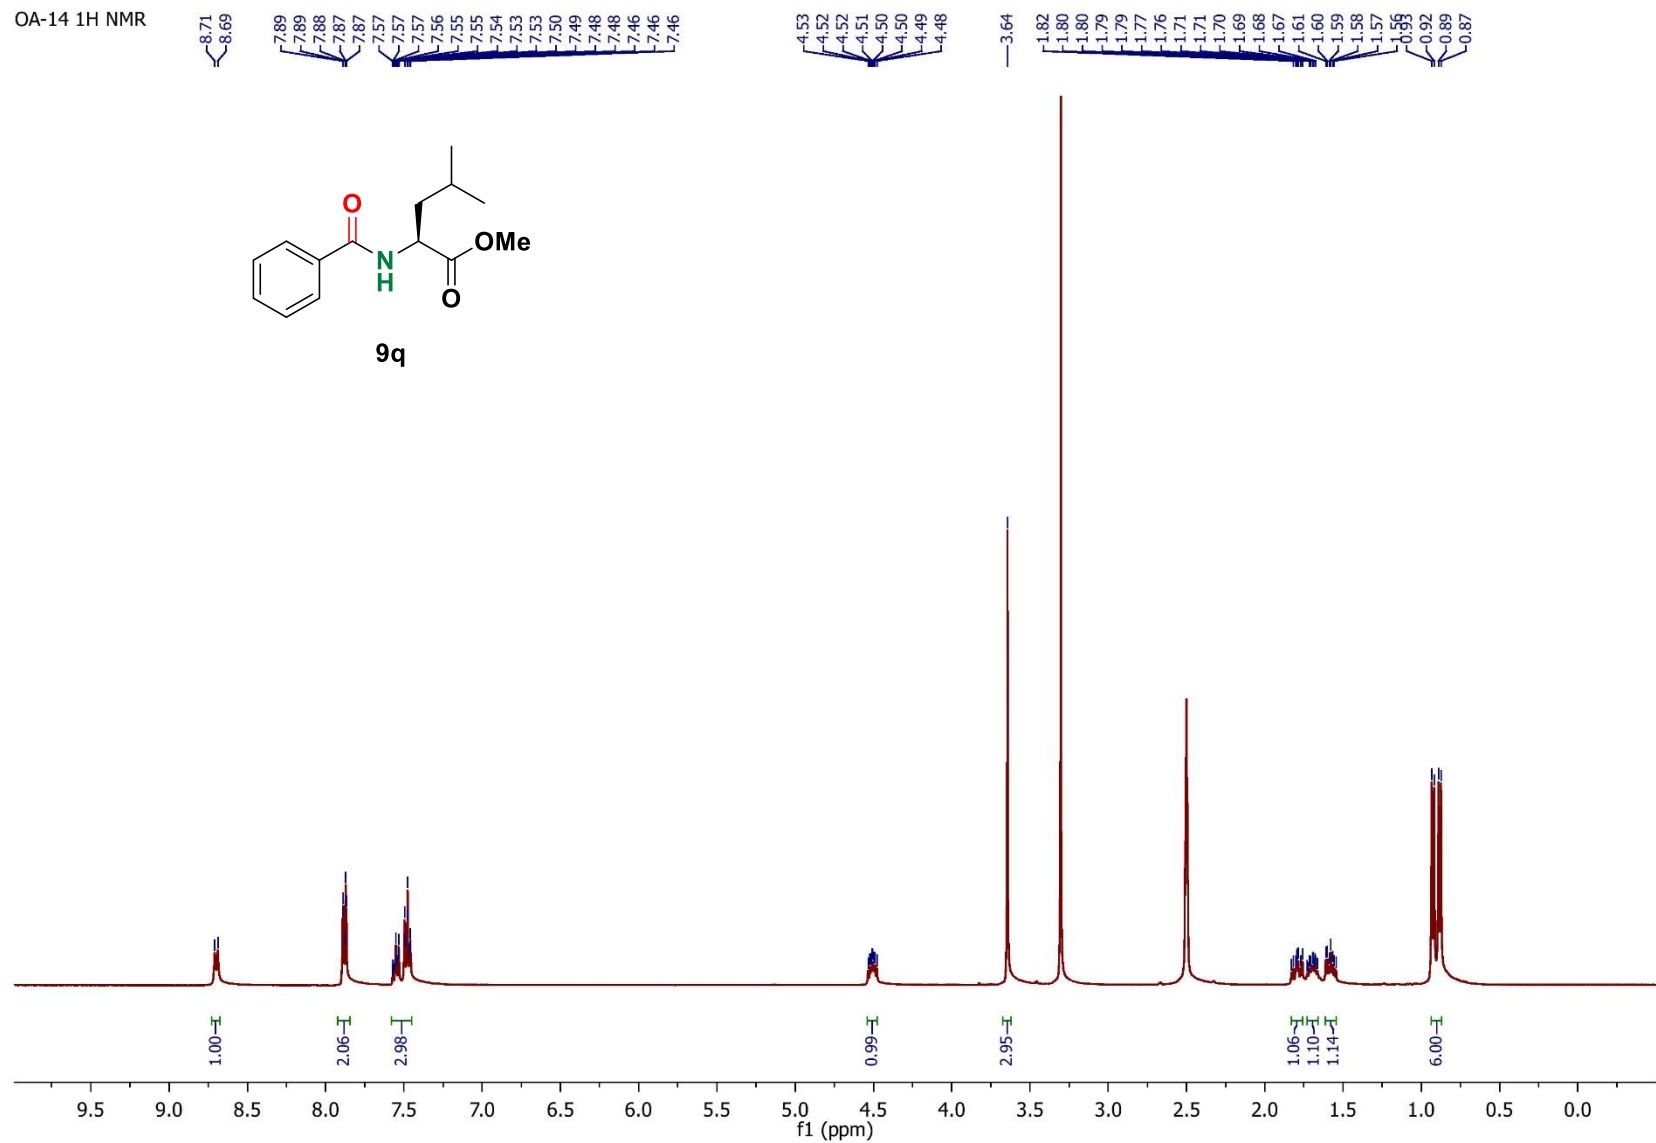

Figure S131. <sup>1</sup>H NMR Spectrum of **9q** (400MHz, DMSO-d<sub>6</sub>)

OA-14 <sup>13</sup>C NMR

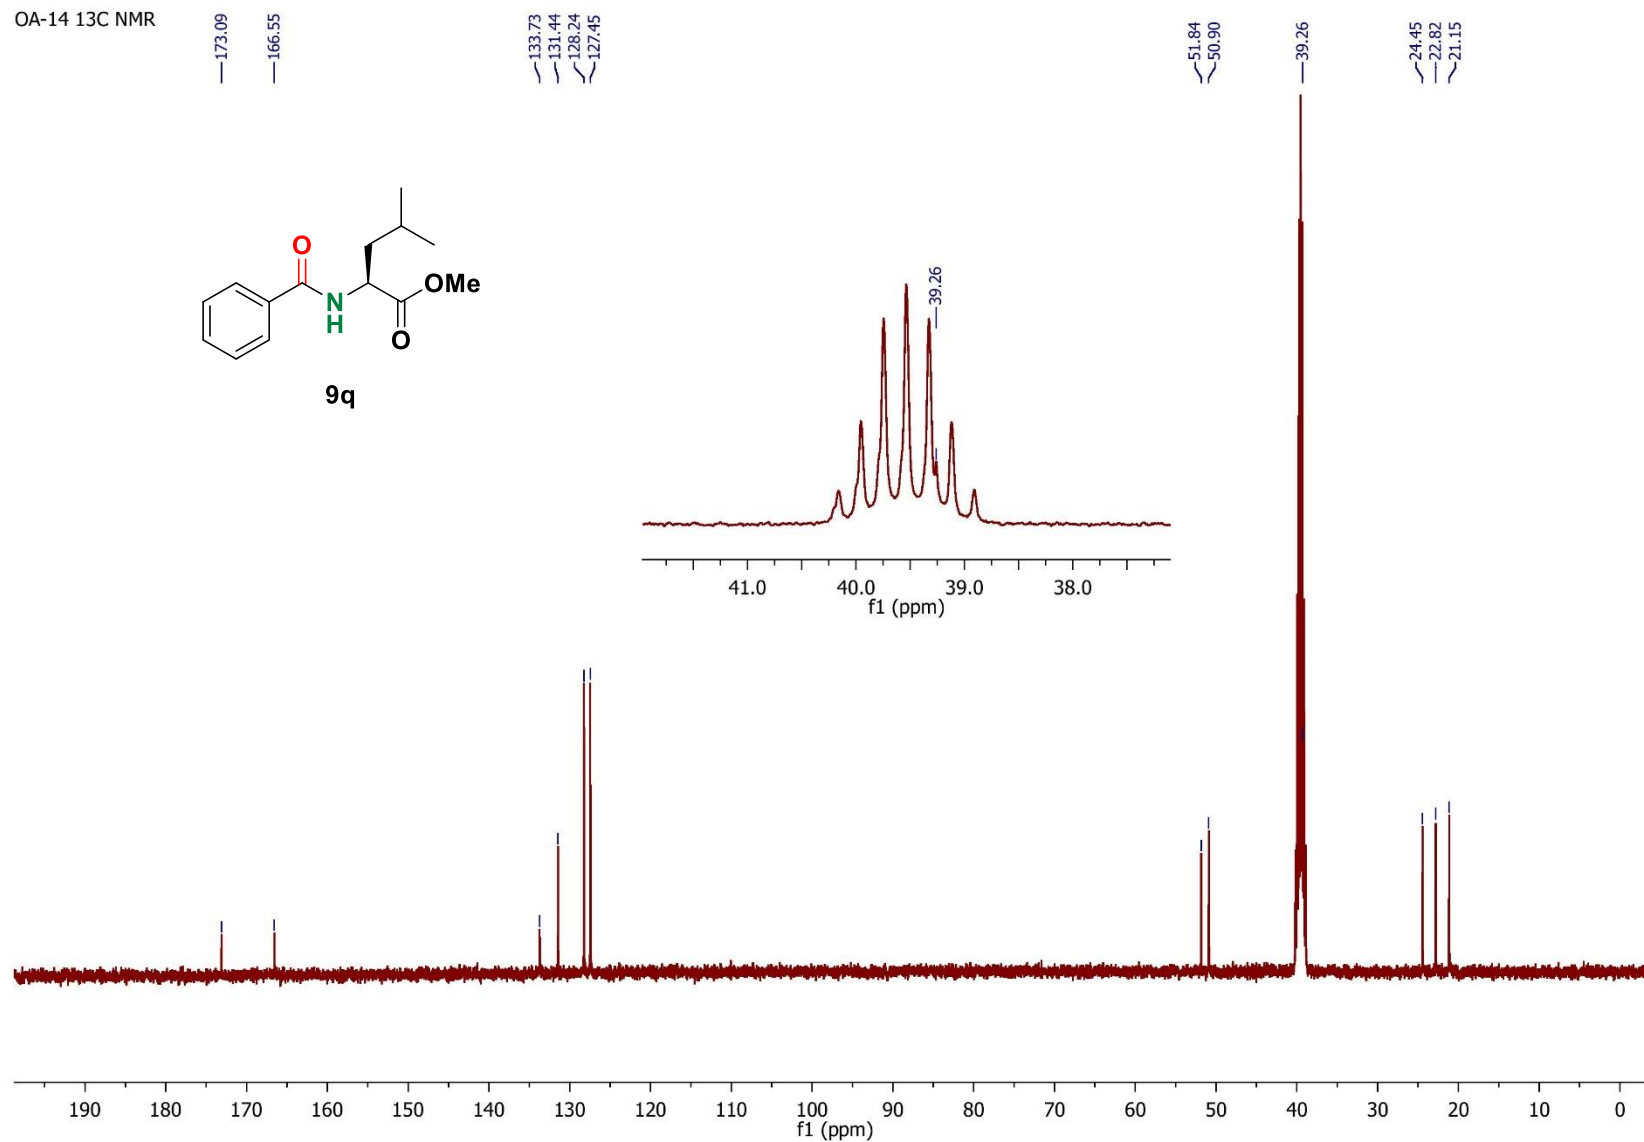

Figure S132. <sup>13</sup>C NMR Spectrum of **9q**(101MHz, DMSO-d<sub>6</sub>)

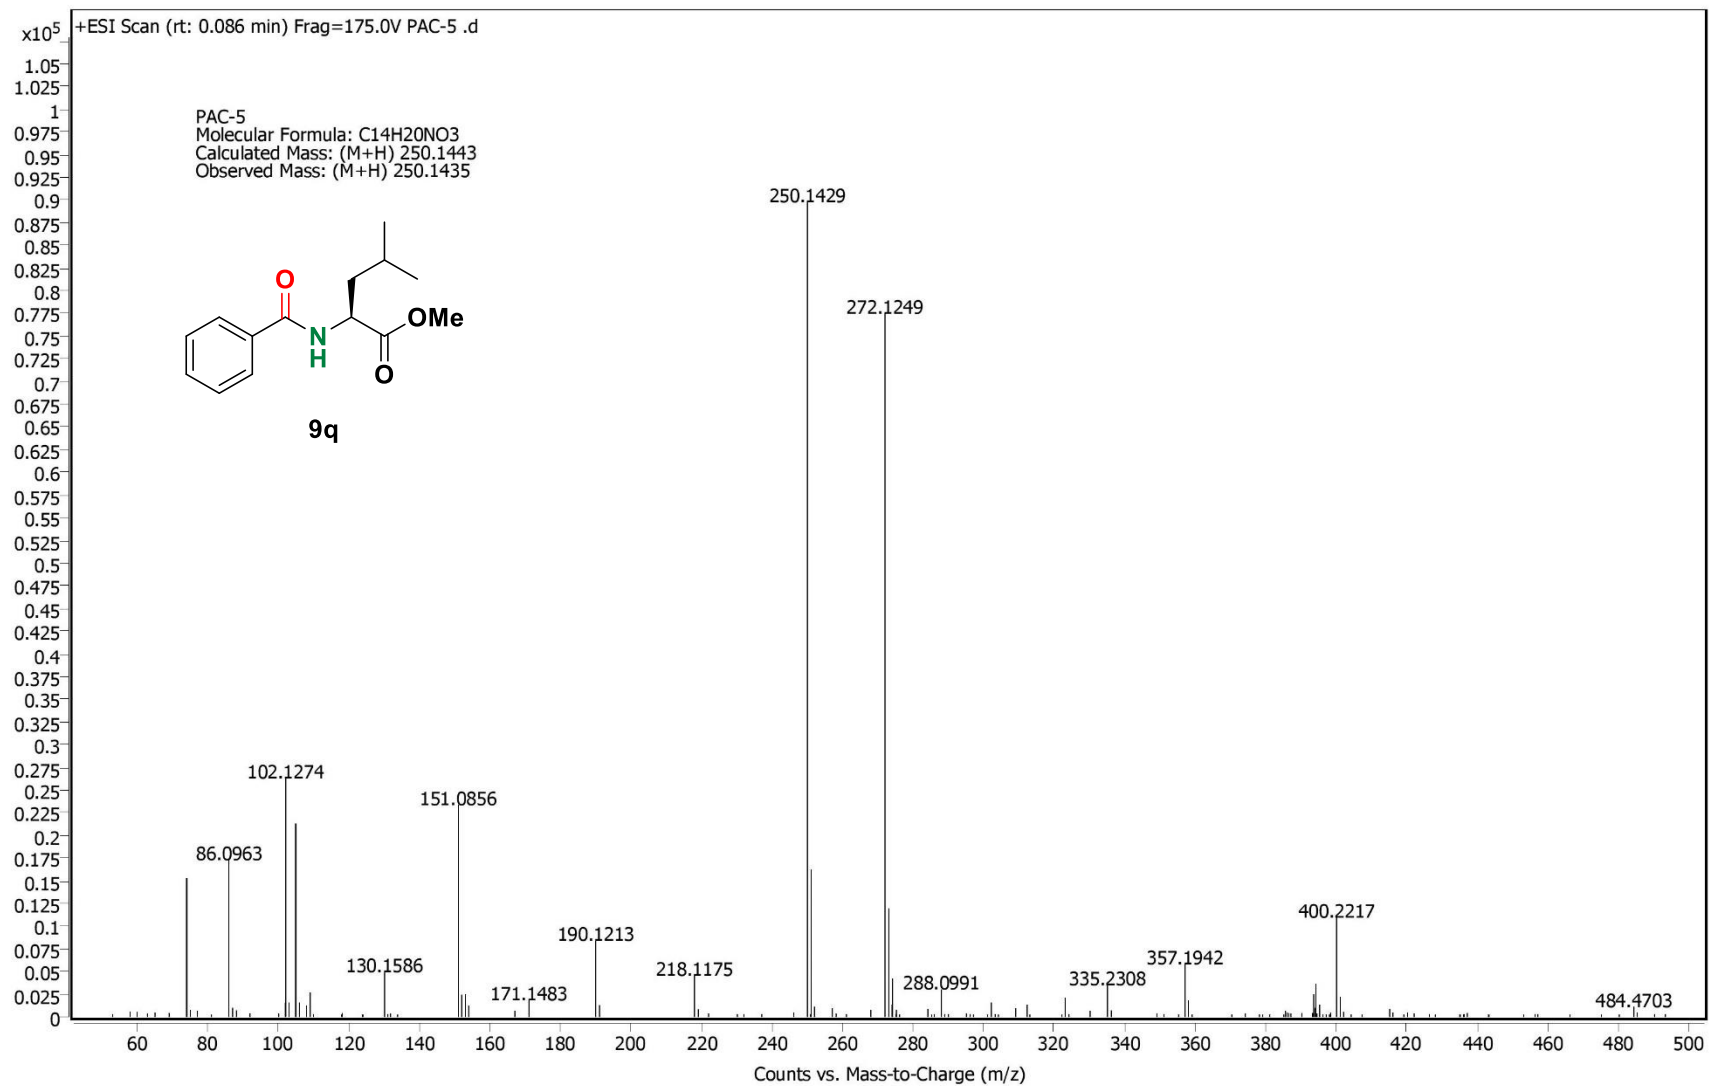

**Figure S133.** HRMS Spectrum of **9q**

OA-12 1H NMR

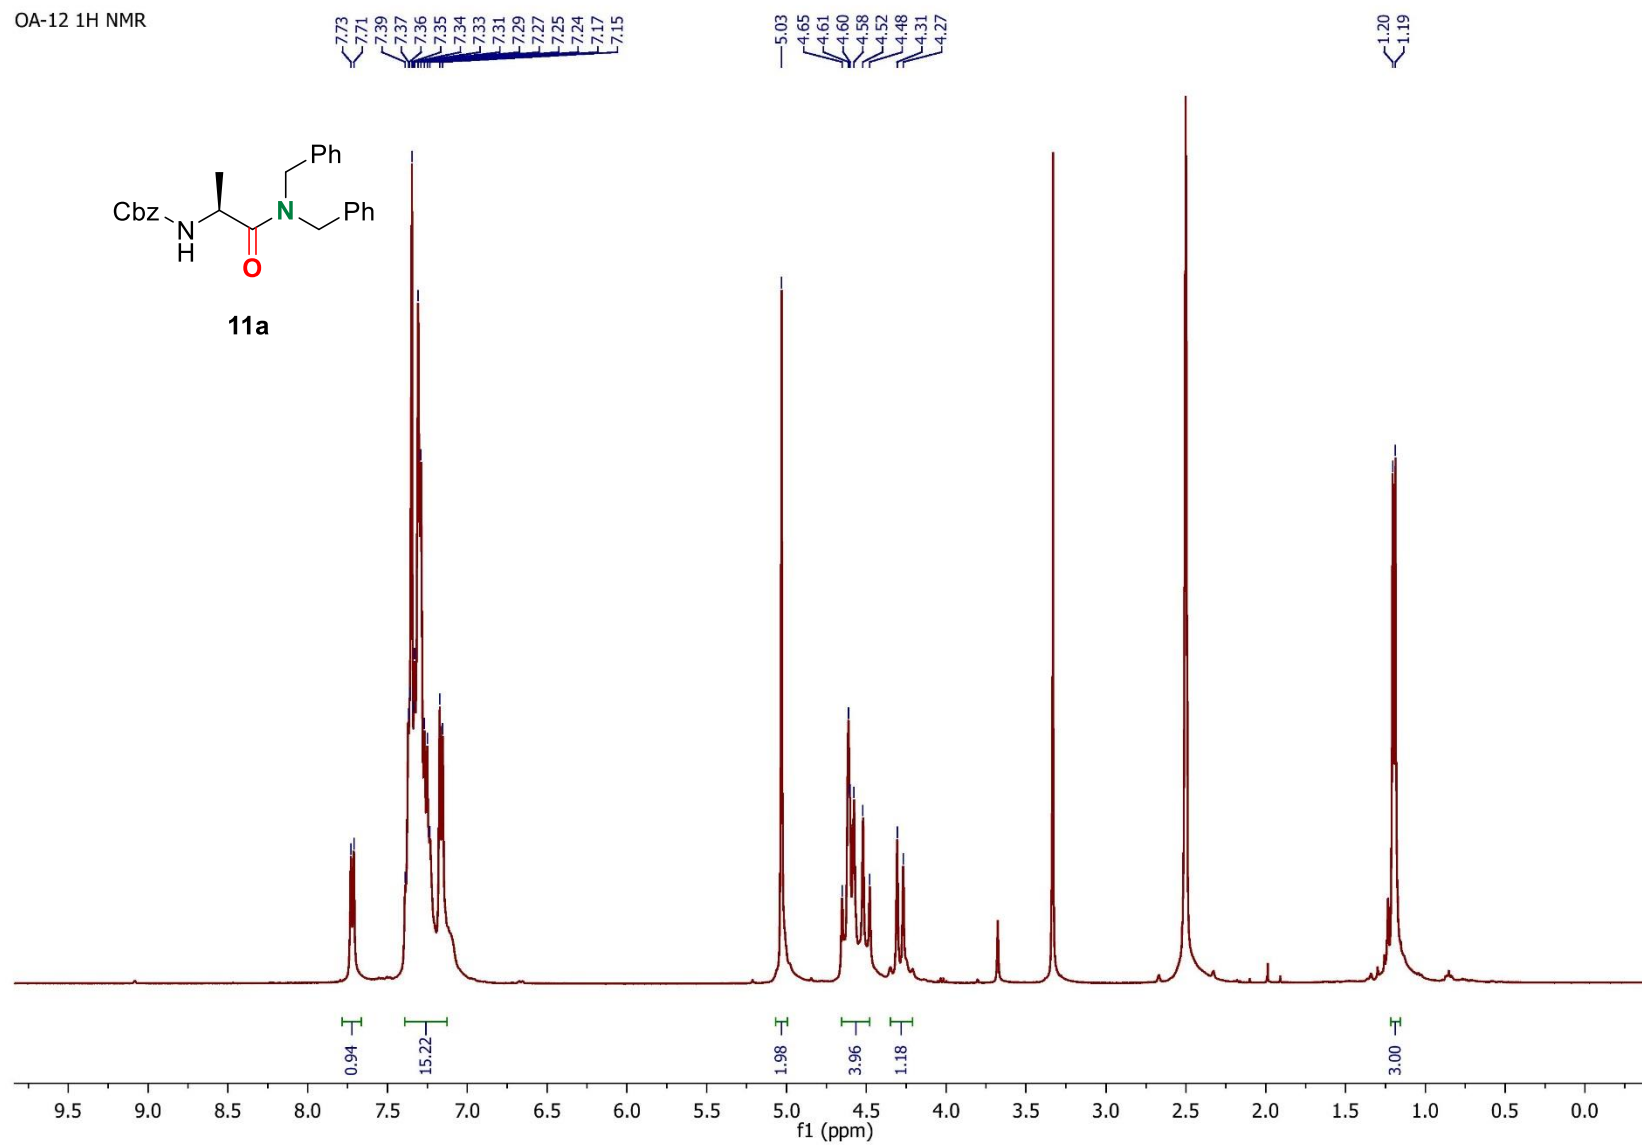

Figure S134. <sup>1</sup>H NMR Spectrum of 11a (400MHz, DMSO-d<sub>6</sub>)

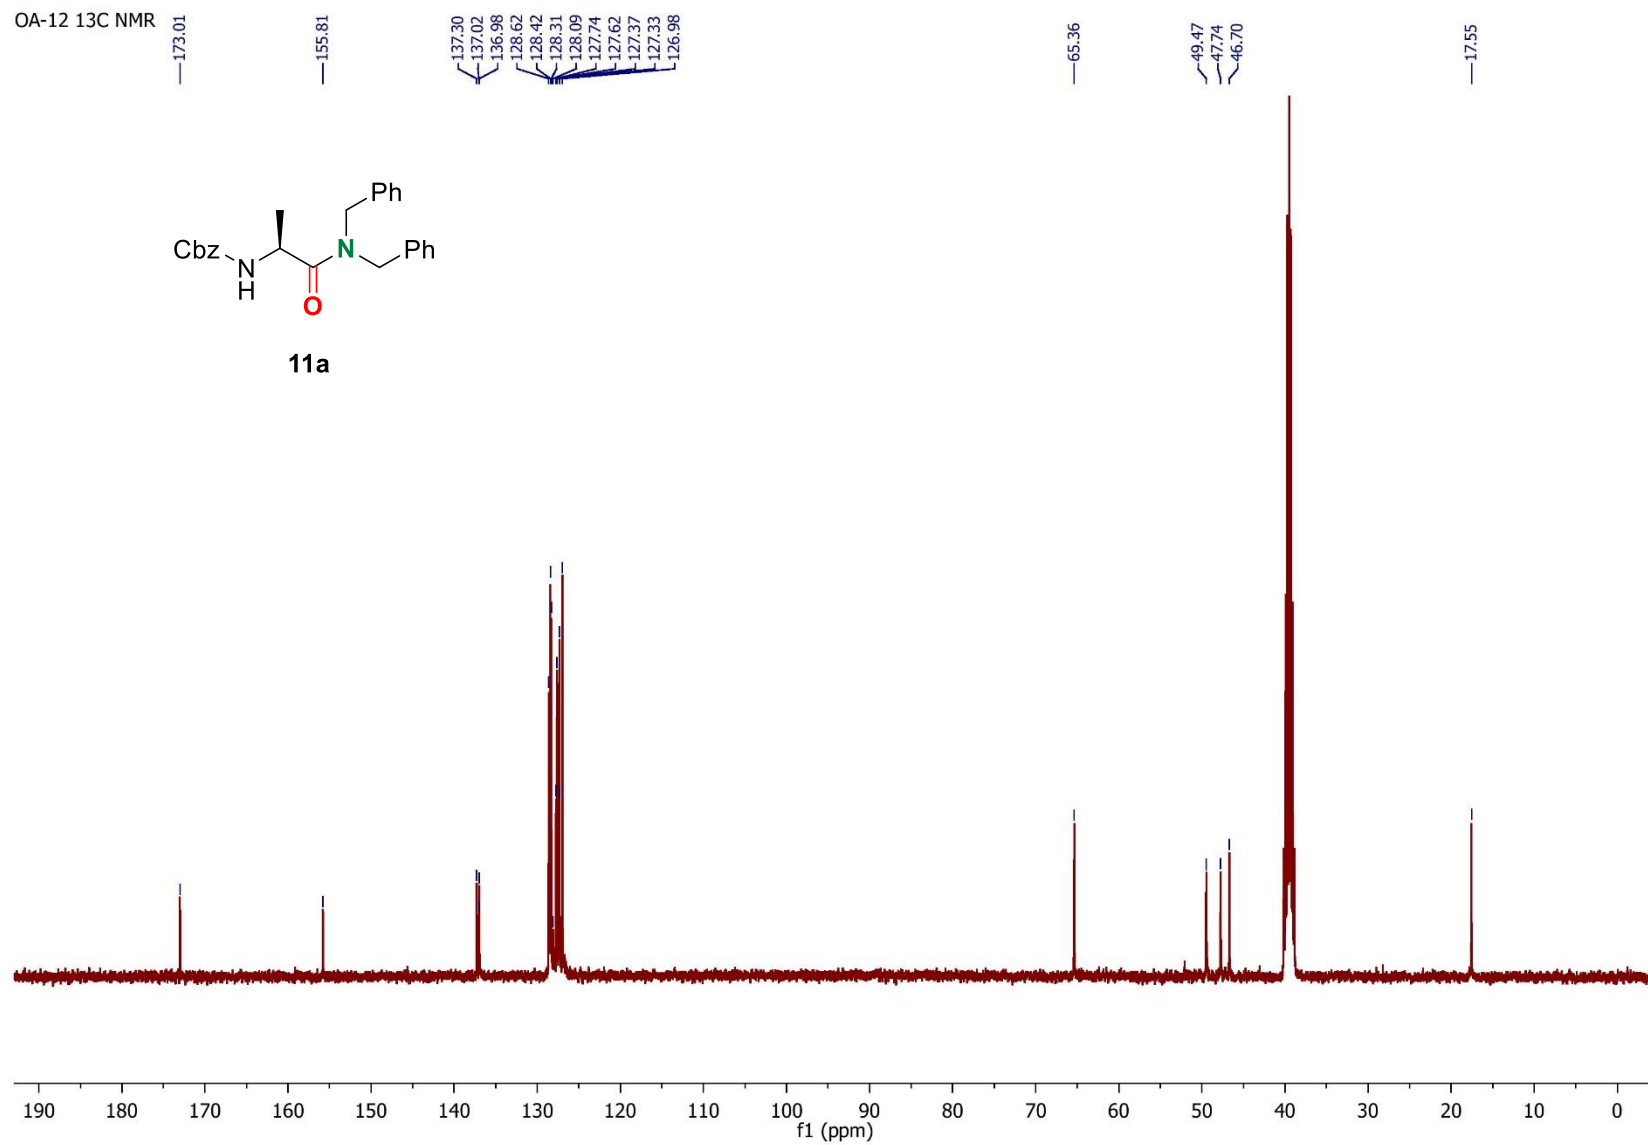

**Figure S135.** <sup>13</sup>C NMR Spectrum of **11a** (101MHz, DMSO-d<sub>6</sub>)

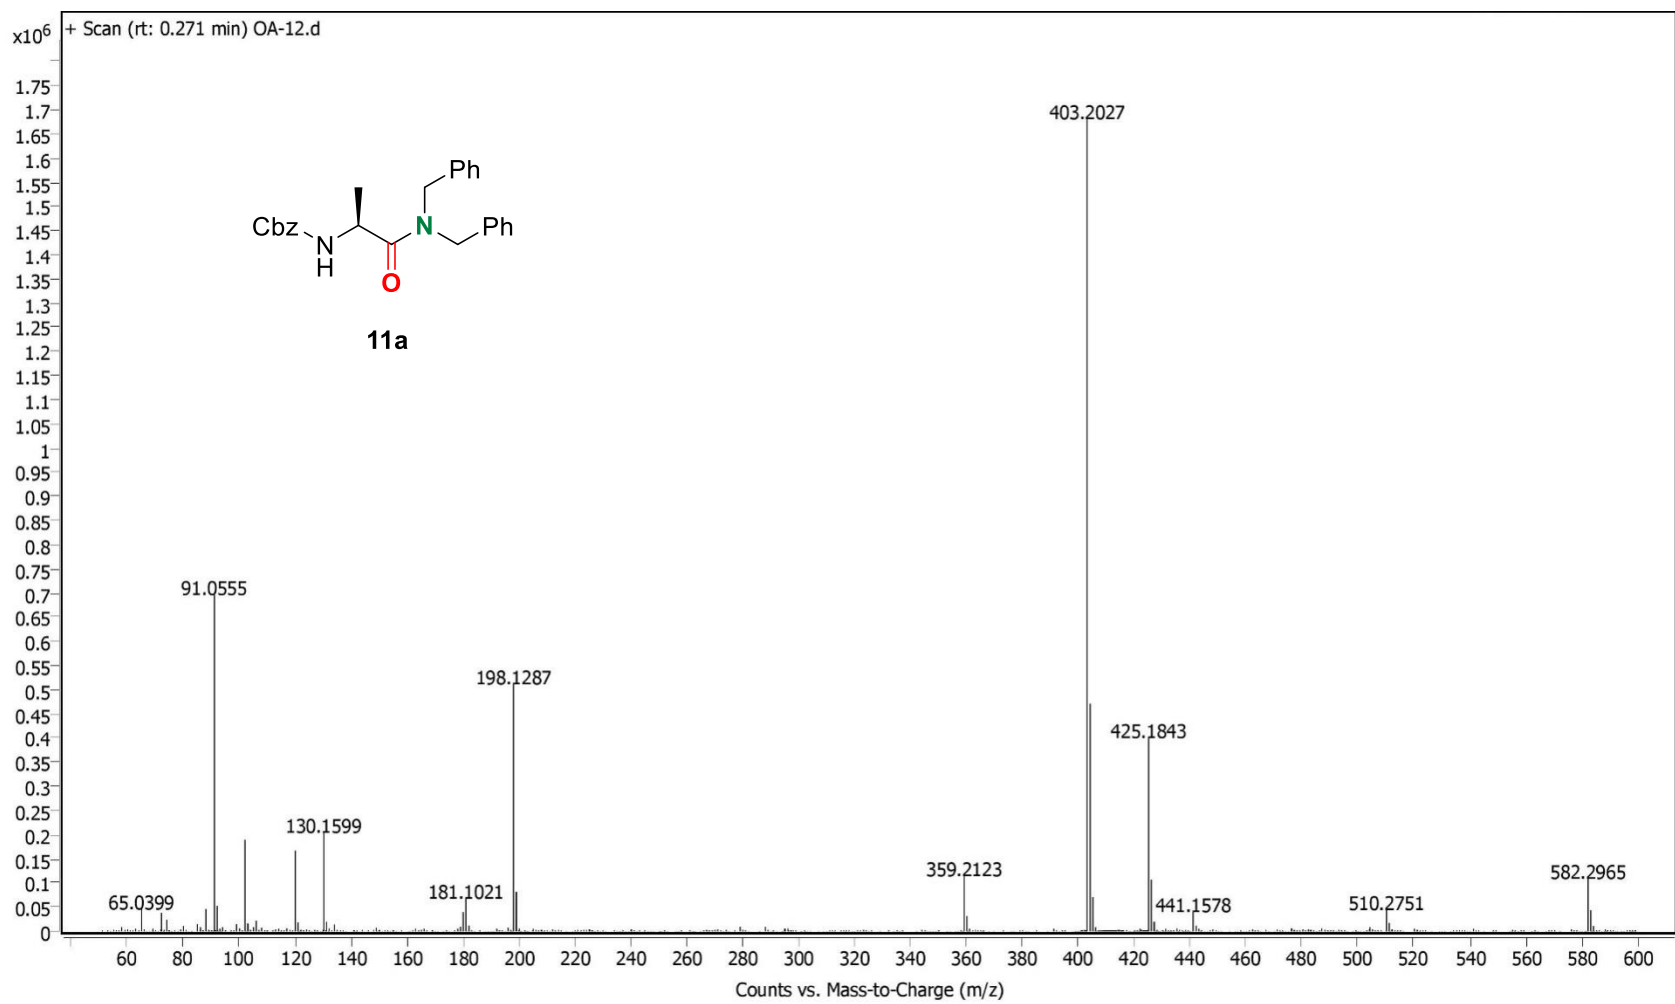

**Figure S136.** HRMS Spectrum of **11a**

OA-5 1H NMR

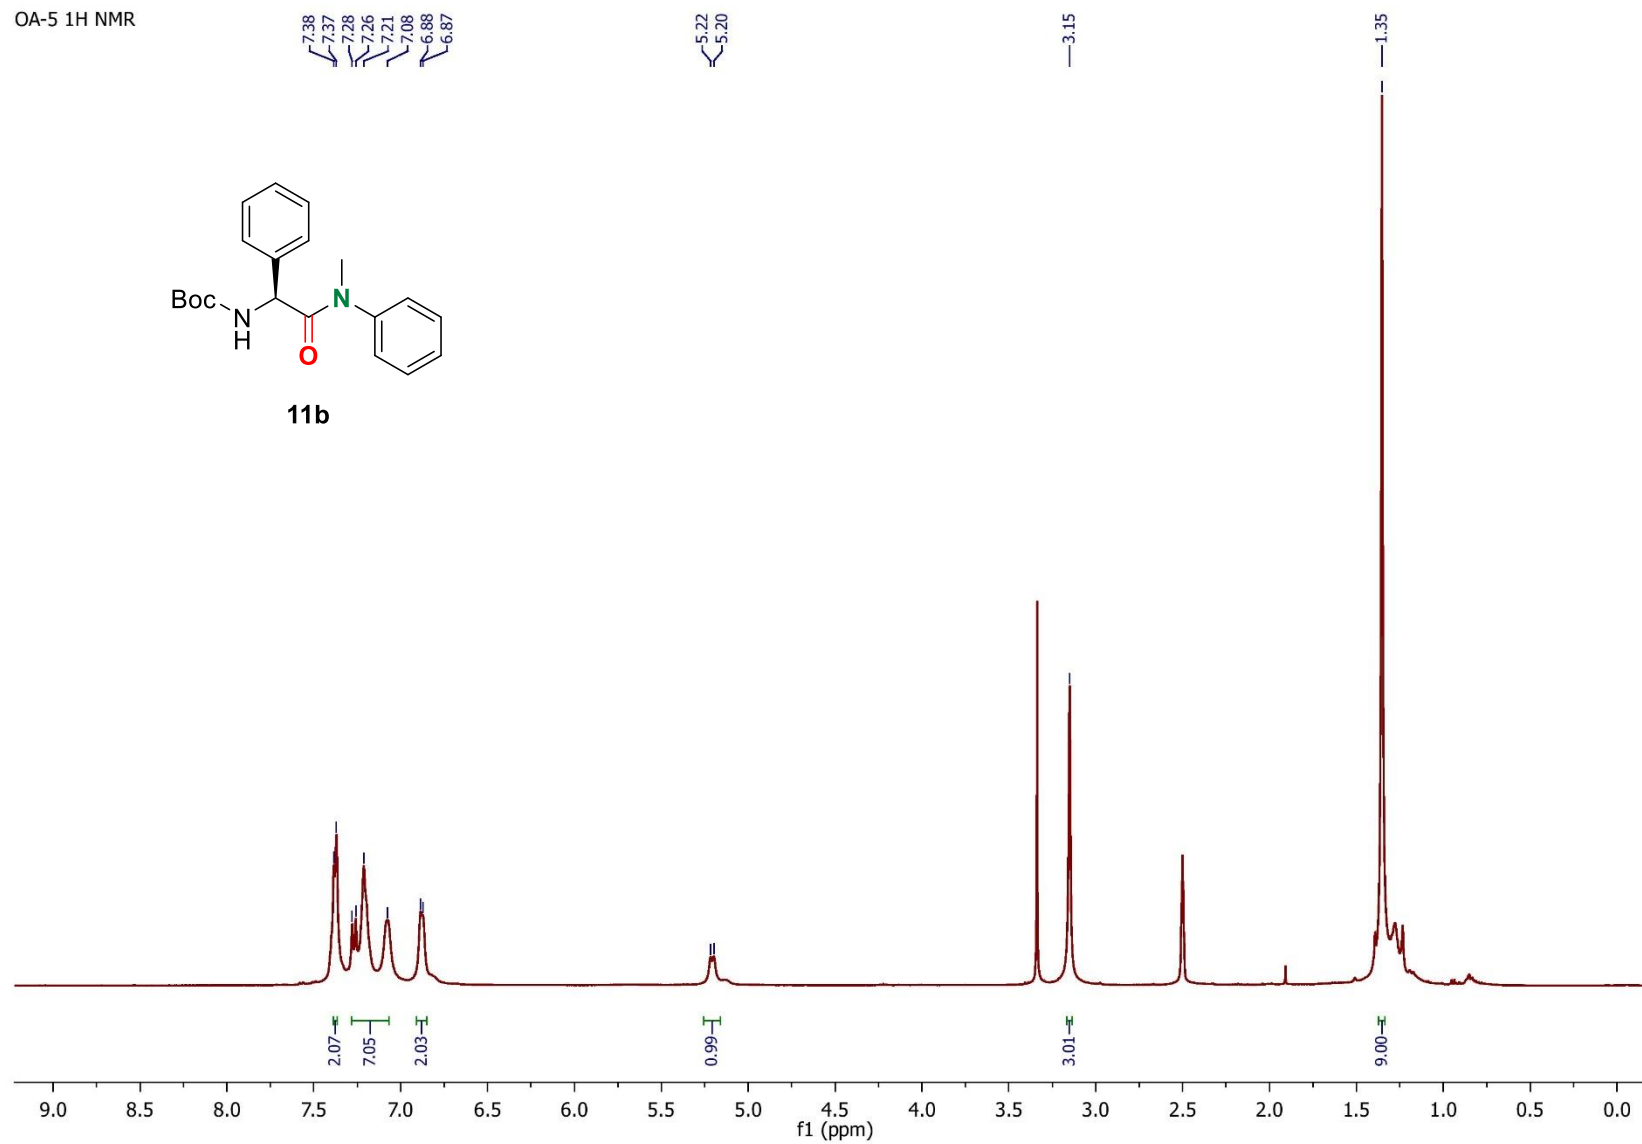

Figure S137. <sup>1</sup>H NMR Spectrum of 11b (400MHz, DMSO-d<sub>6</sub>)



OA-5 <sup>13</sup>C NMR

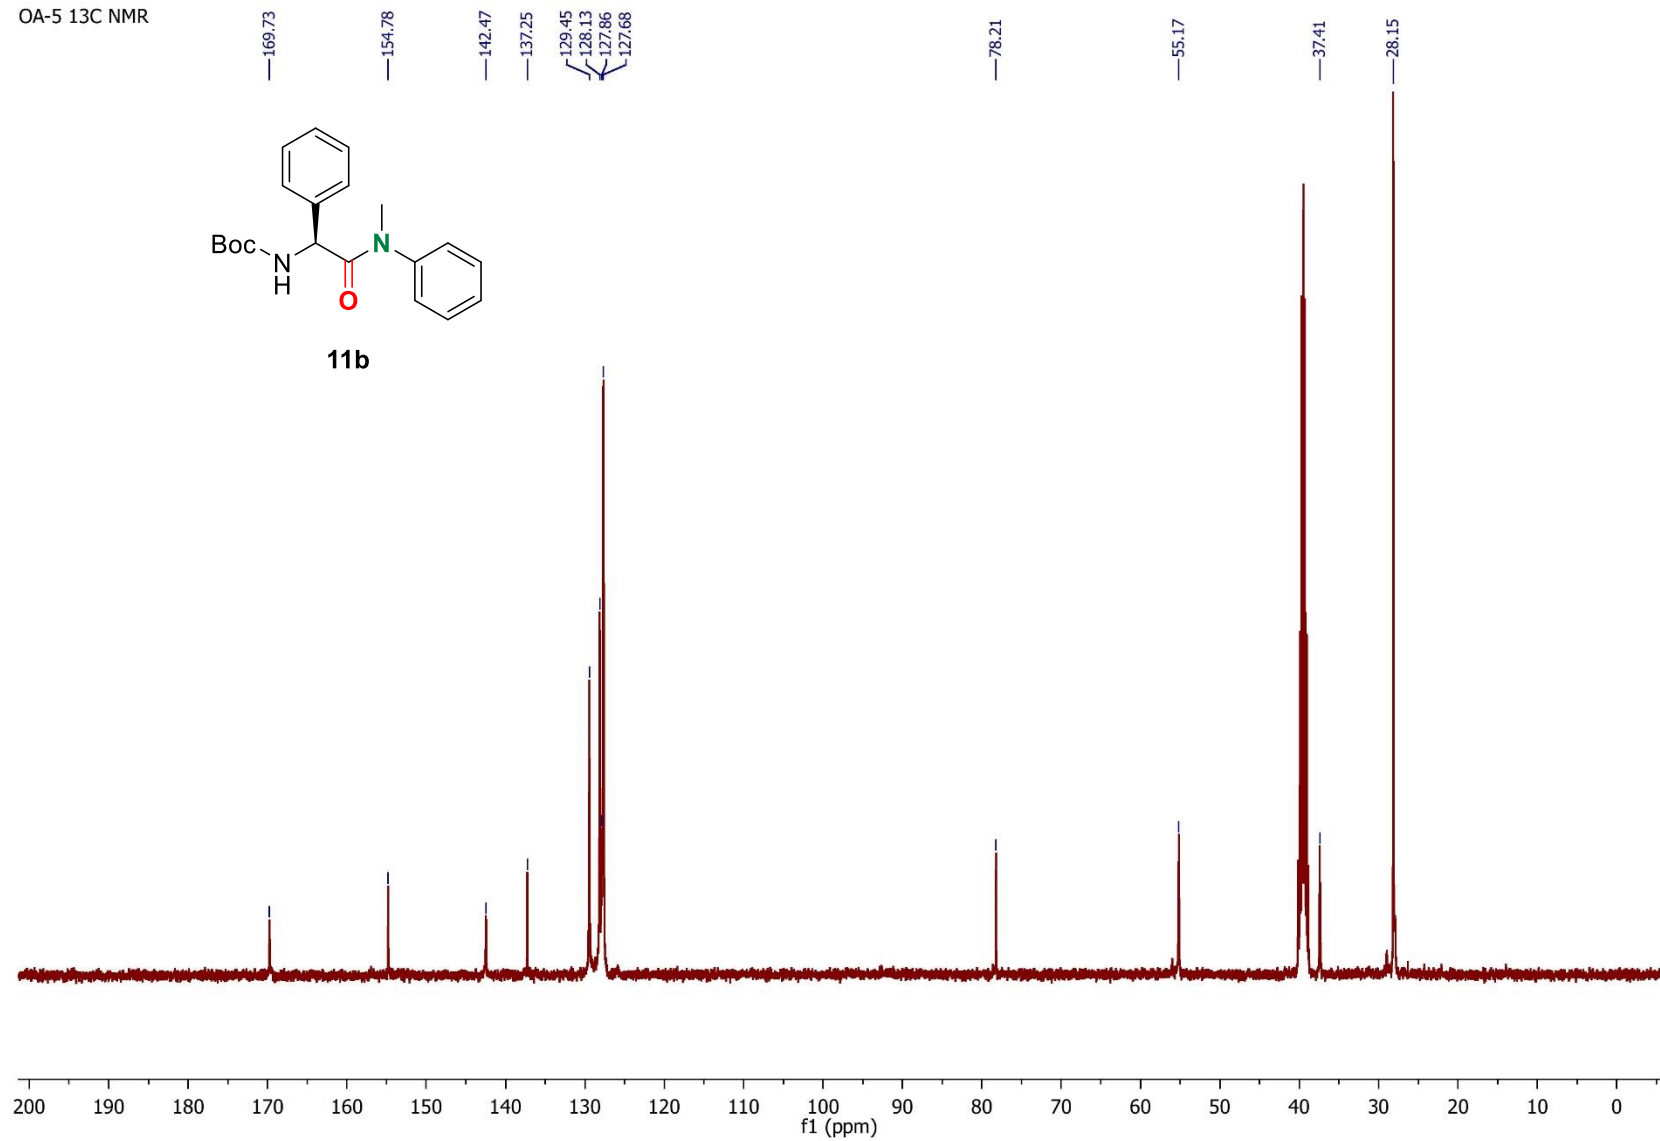

Figure S138. <sup>13</sup>C NMR Spectrum of 11b (101MHz, DMSO-d<sub>6</sub>)

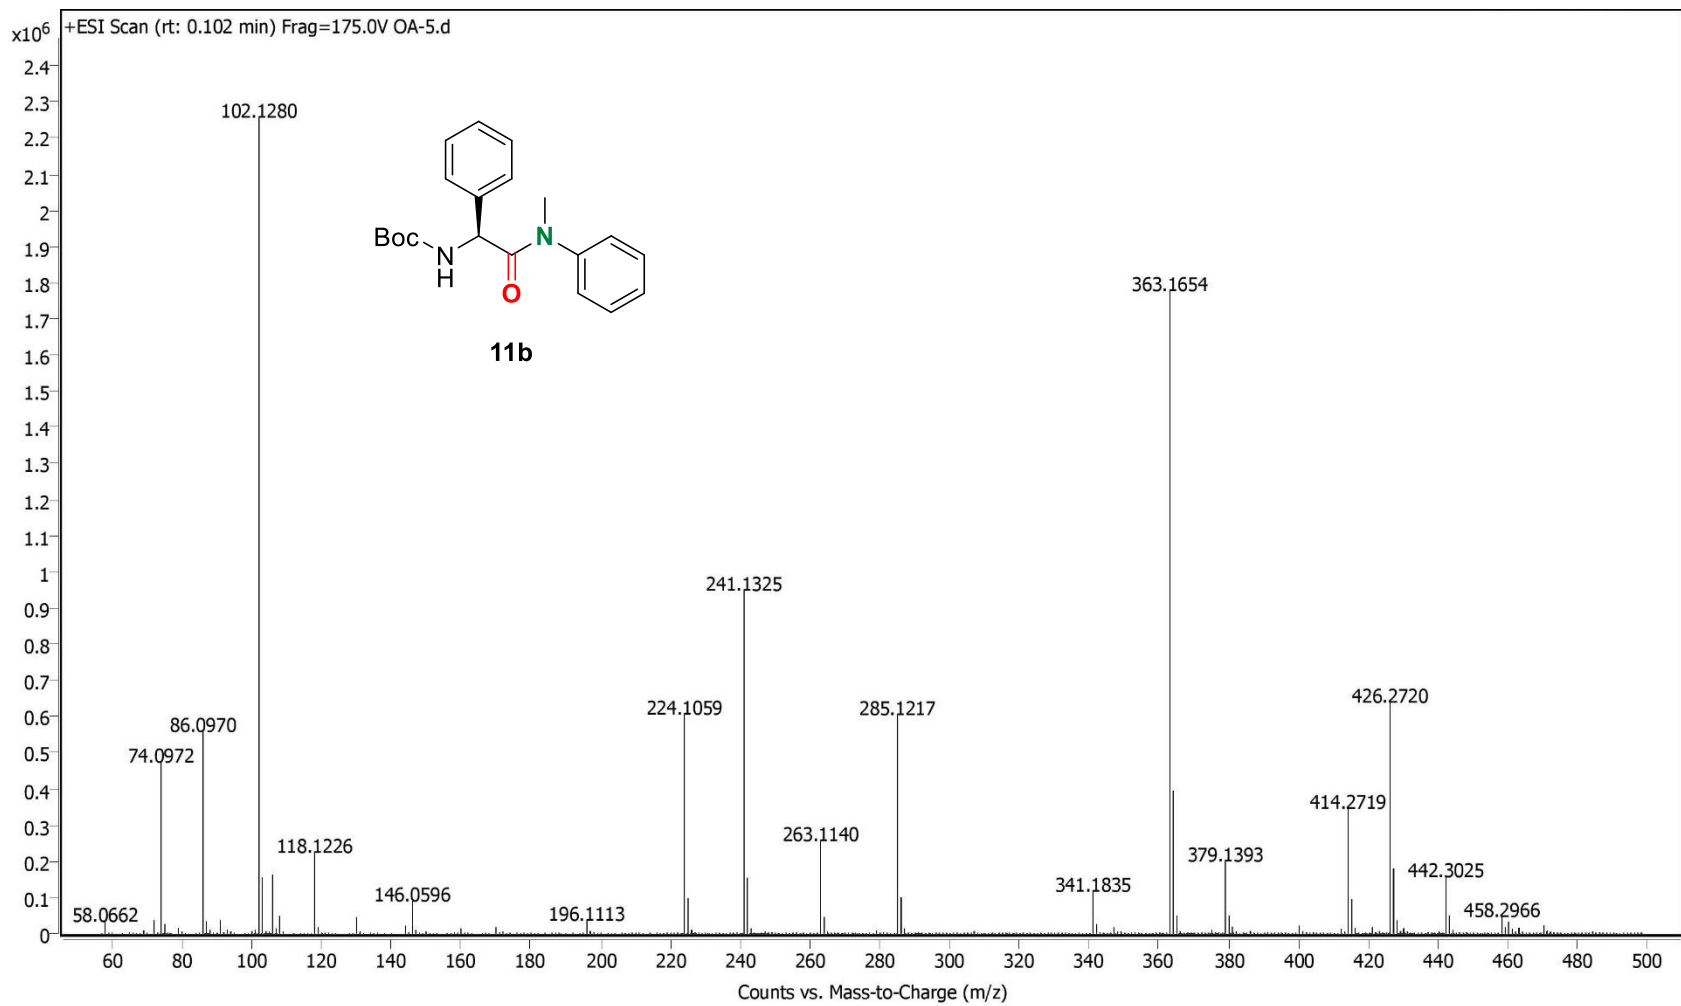

**Figure S139.** HRMS Spectrum of **11b**

OA-11 1H NMR

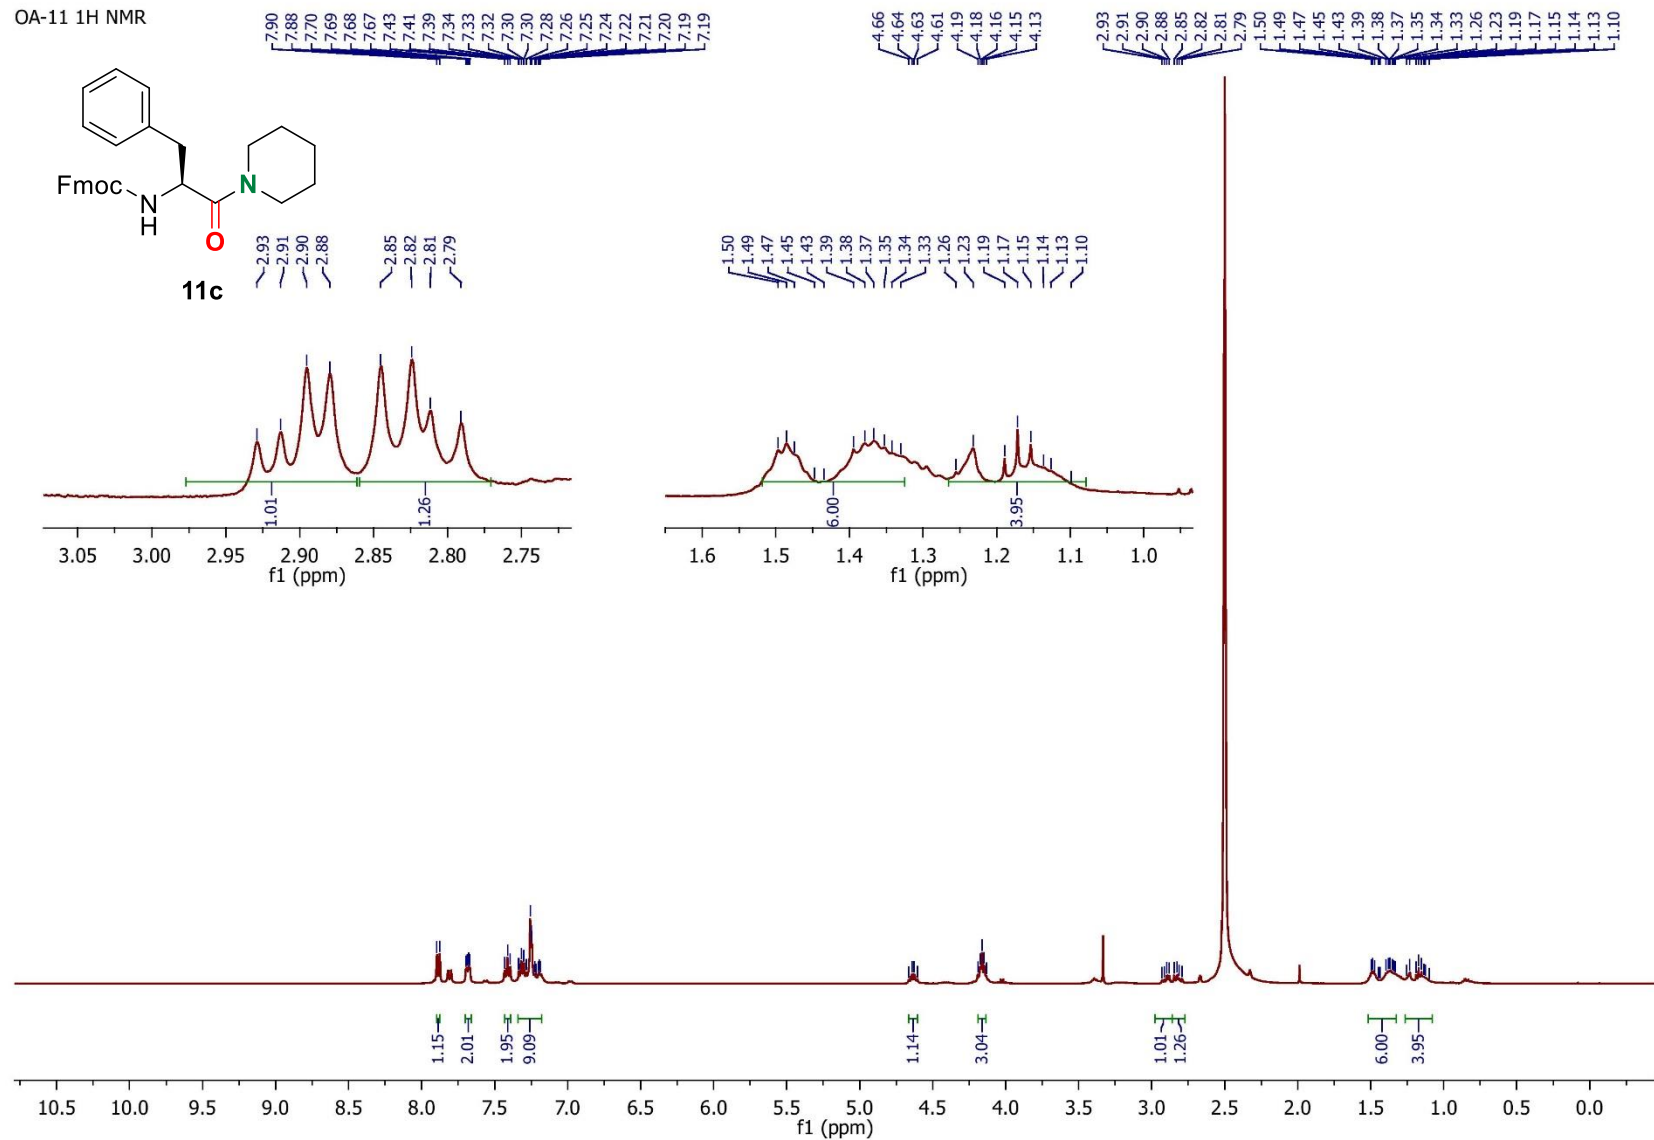

Figure S140. <sup>1</sup>H NMR Spectrum of 11c (400MHz, DMSO-d<sub>6</sub>)

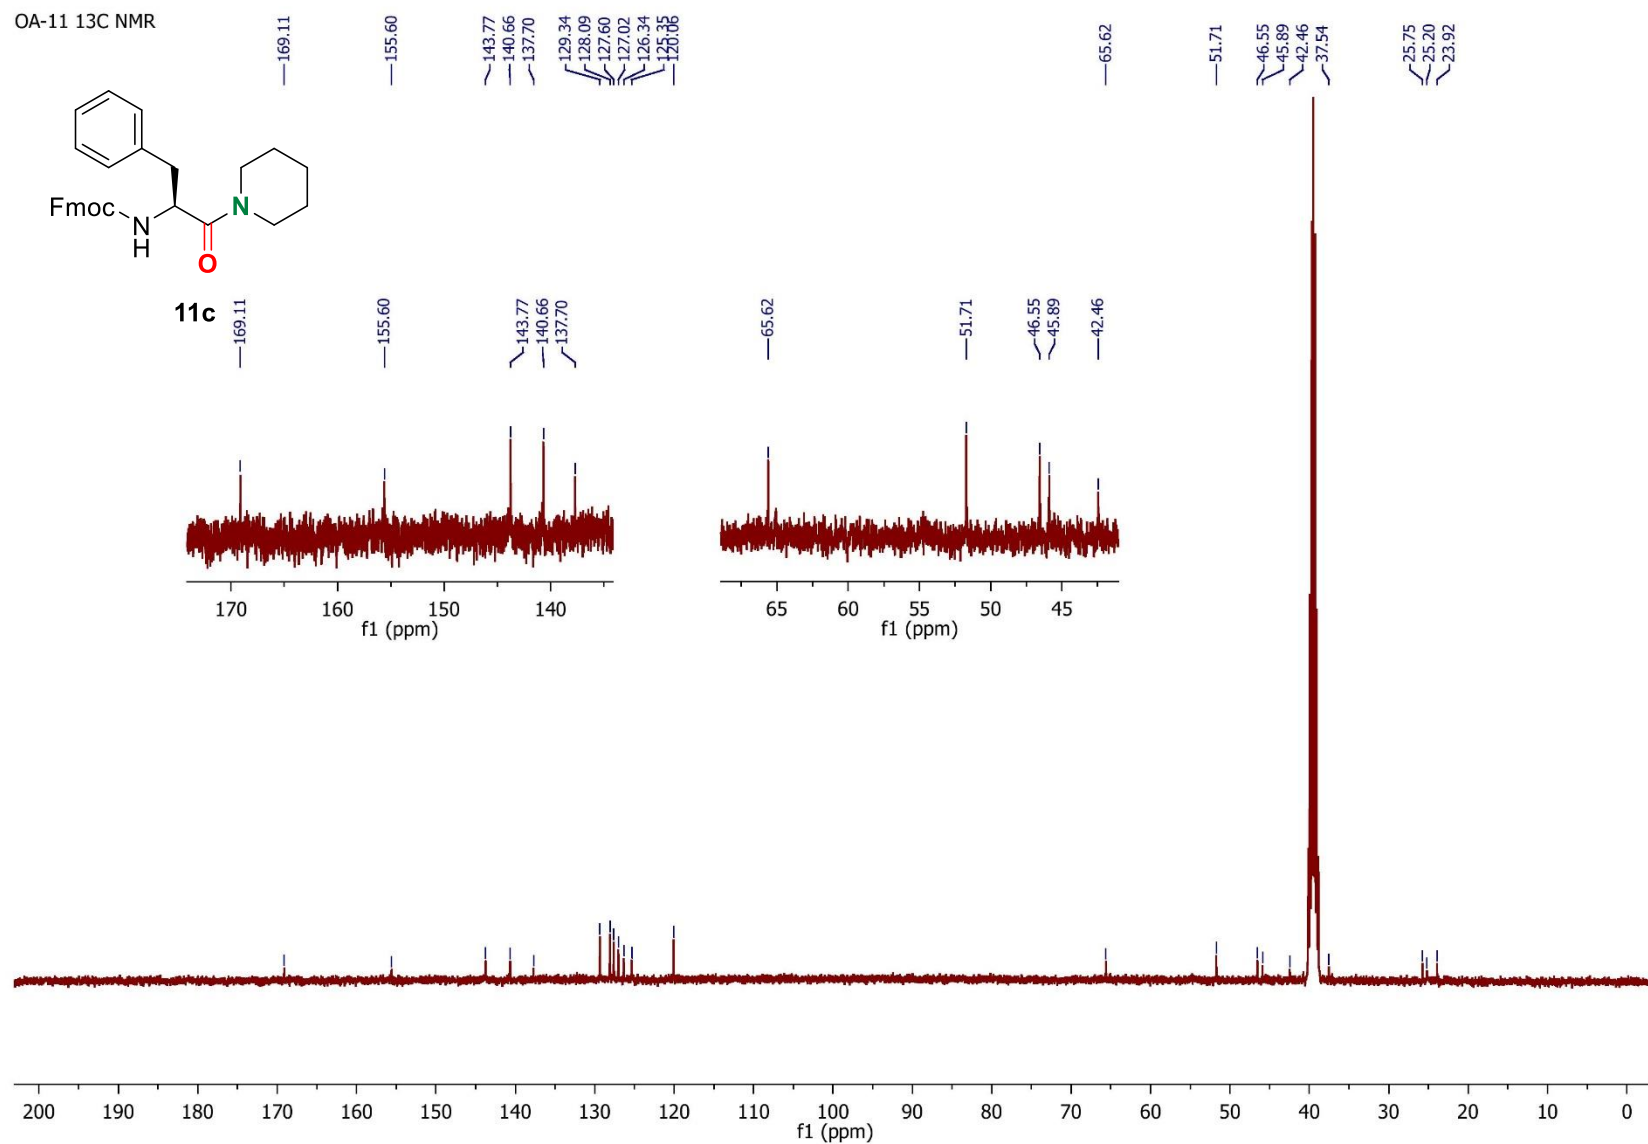

Figure S141. <sup>13</sup>C NMR Spectrum of **11c** (101MHz, DMSO-d<sub>6</sub>)

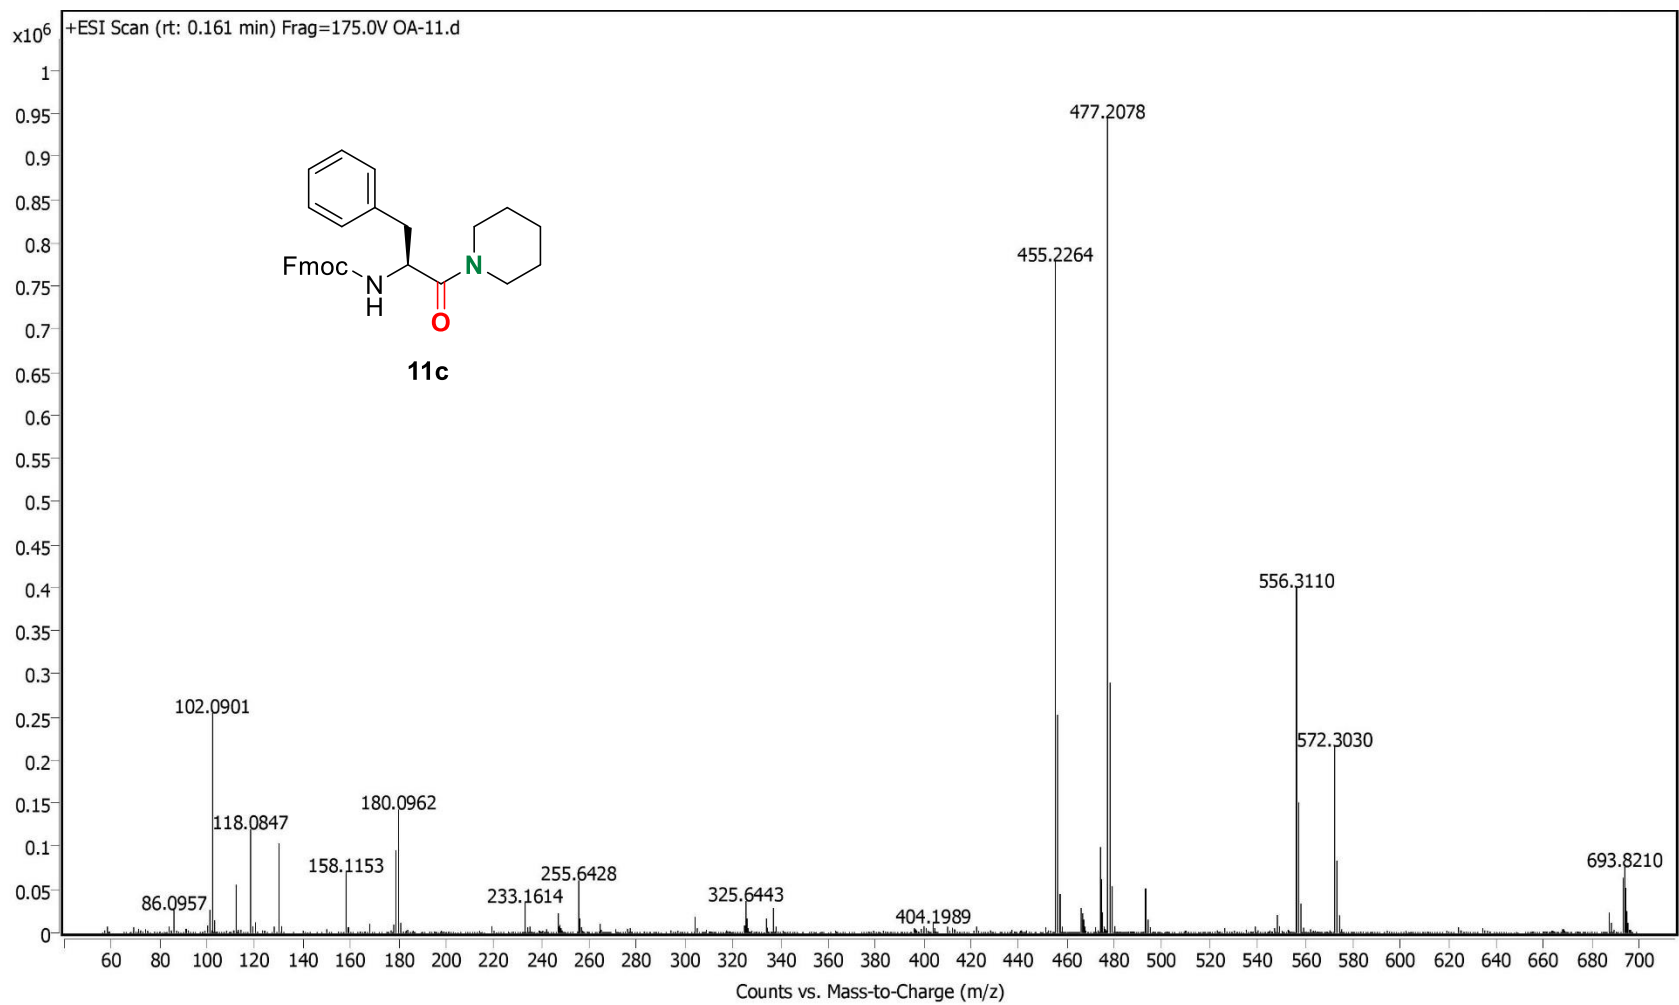

**Figure S142.** HRMS Spectrum of **11c**

OA-6 1H NMR

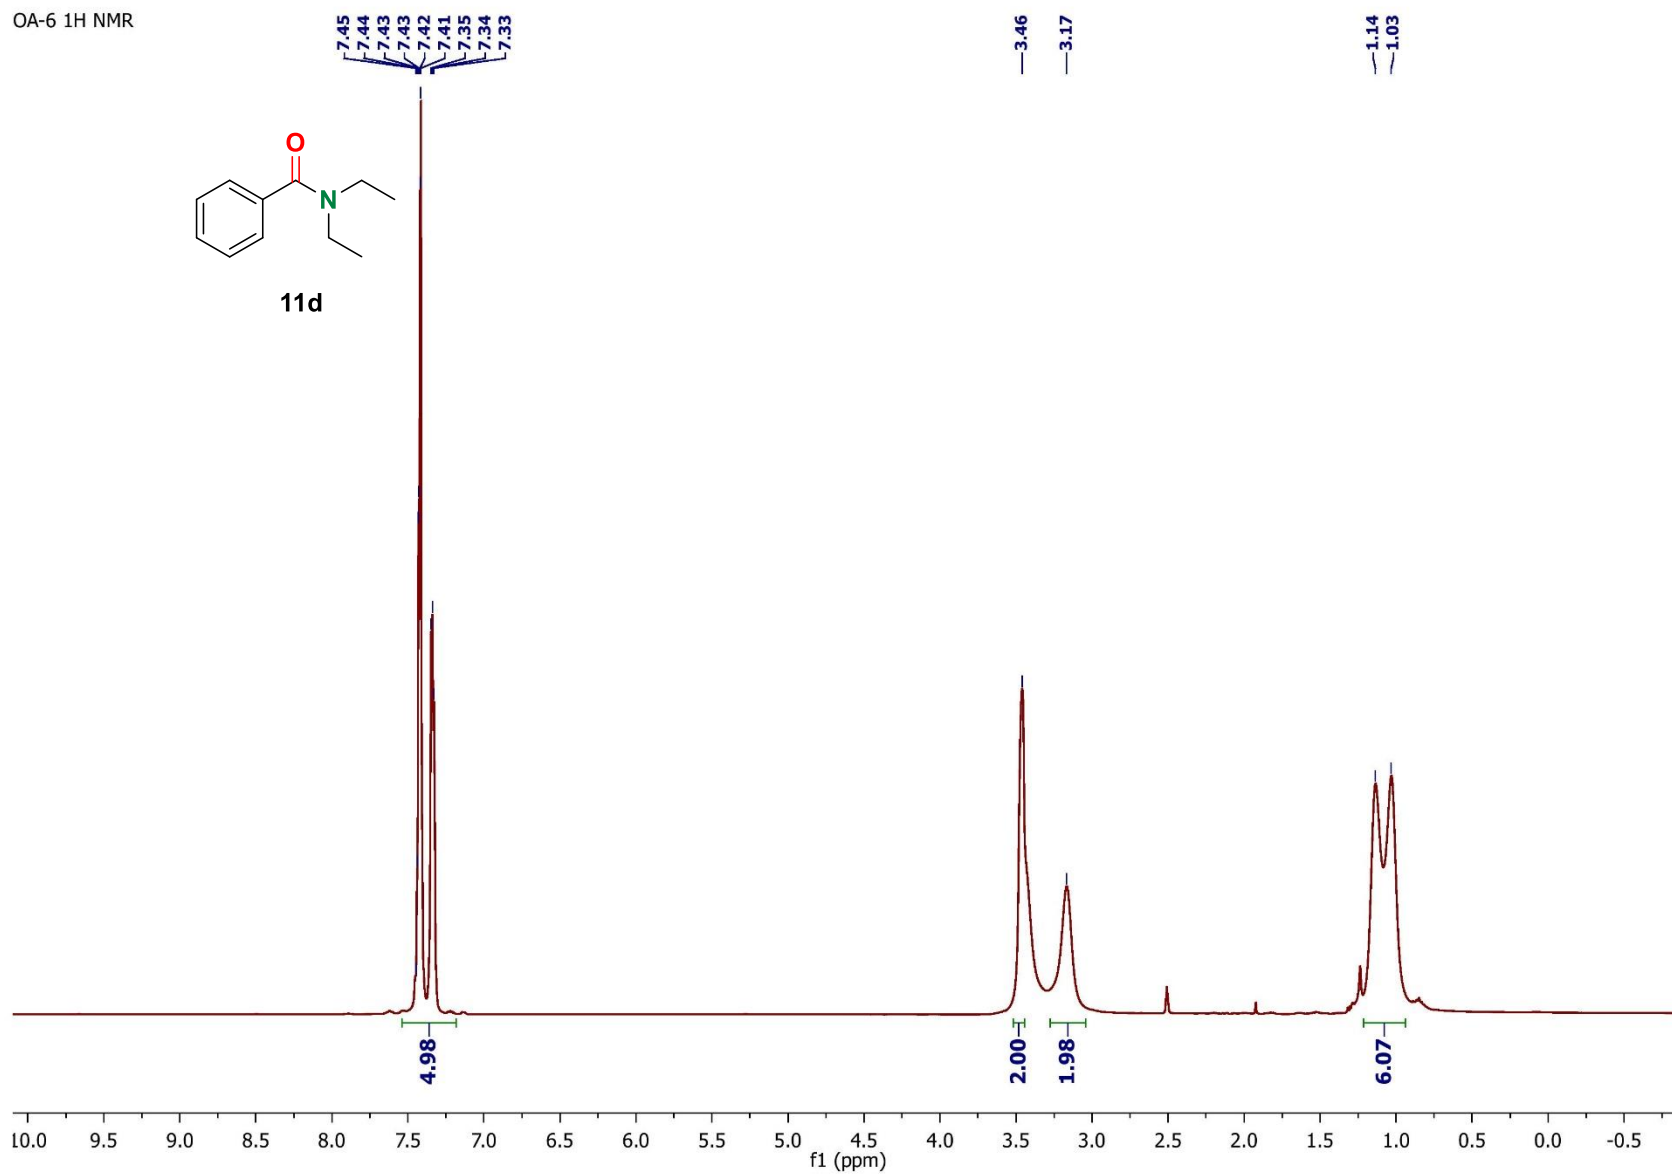

Figure S143. <sup>1</sup>H NMR Spectrum of 11d (400MHz, DMSO-d<sub>6</sub>)

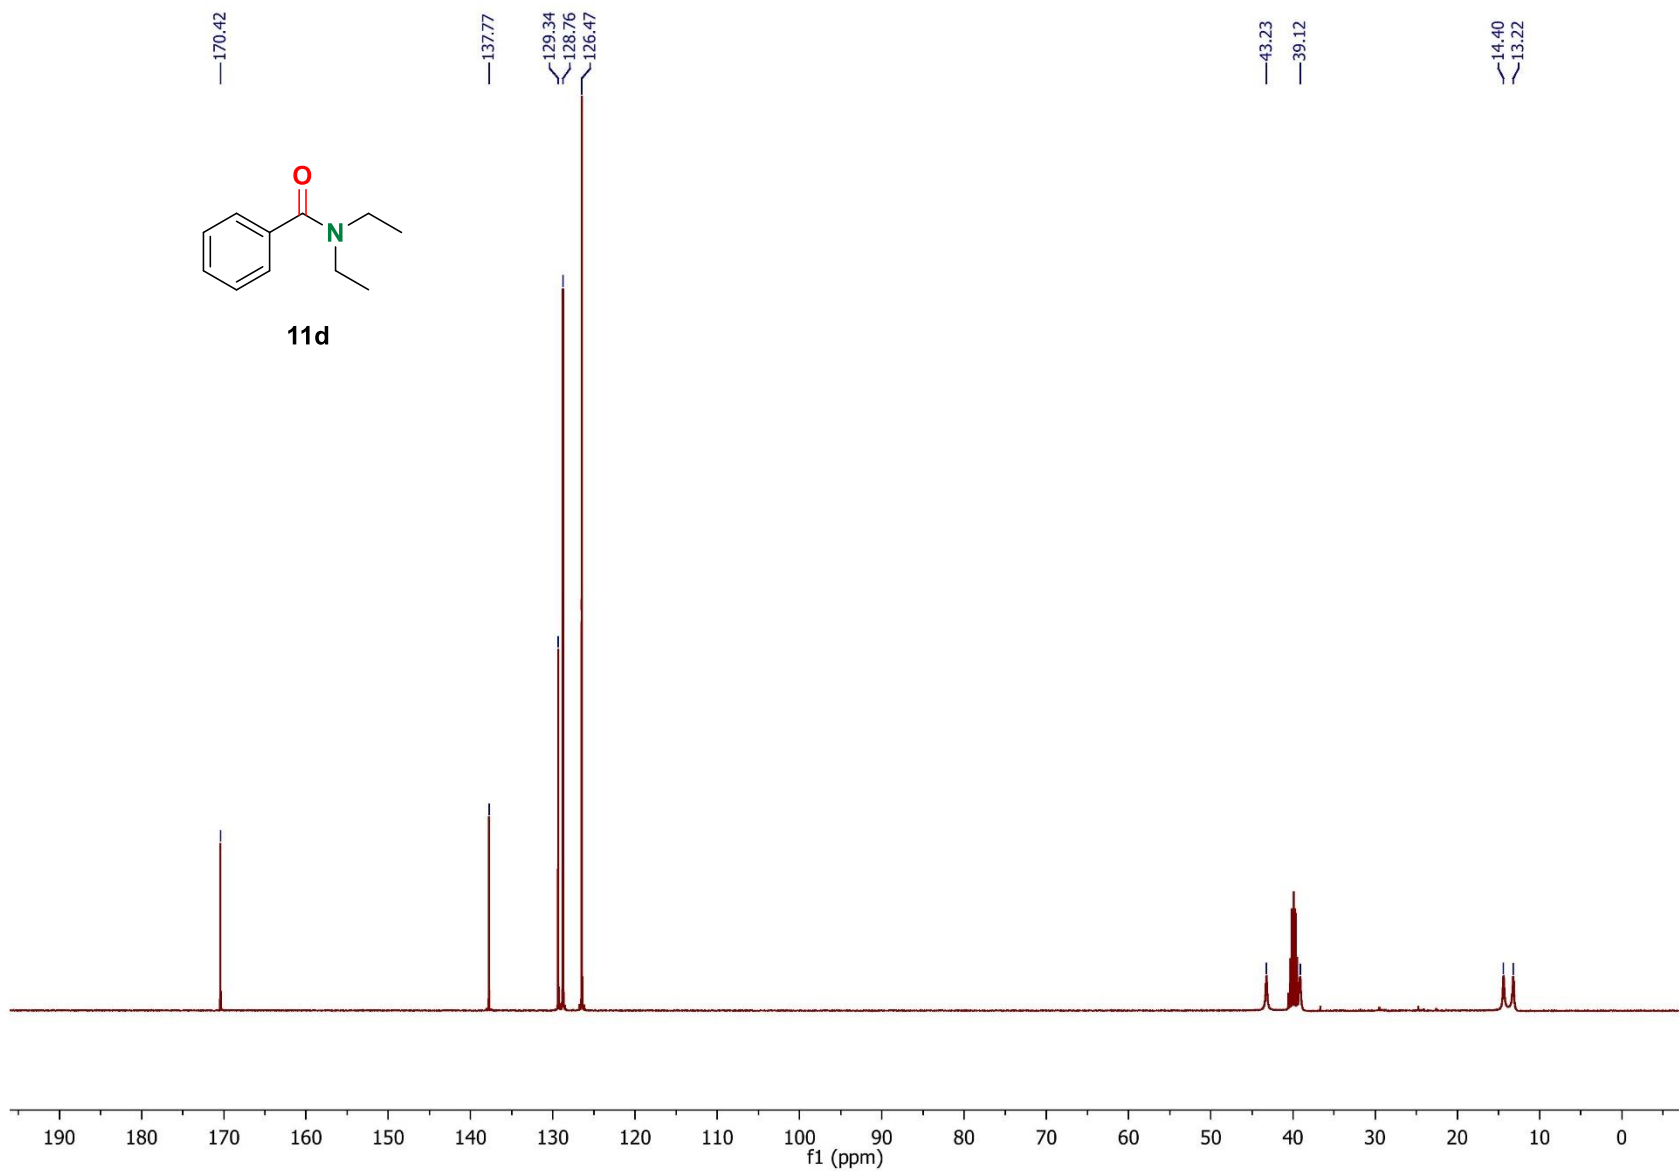

**Figure S144.** <sup>13</sup>C NMR Spectrum of 11d (101MHz, DMSO-d<sub>6</sub>)

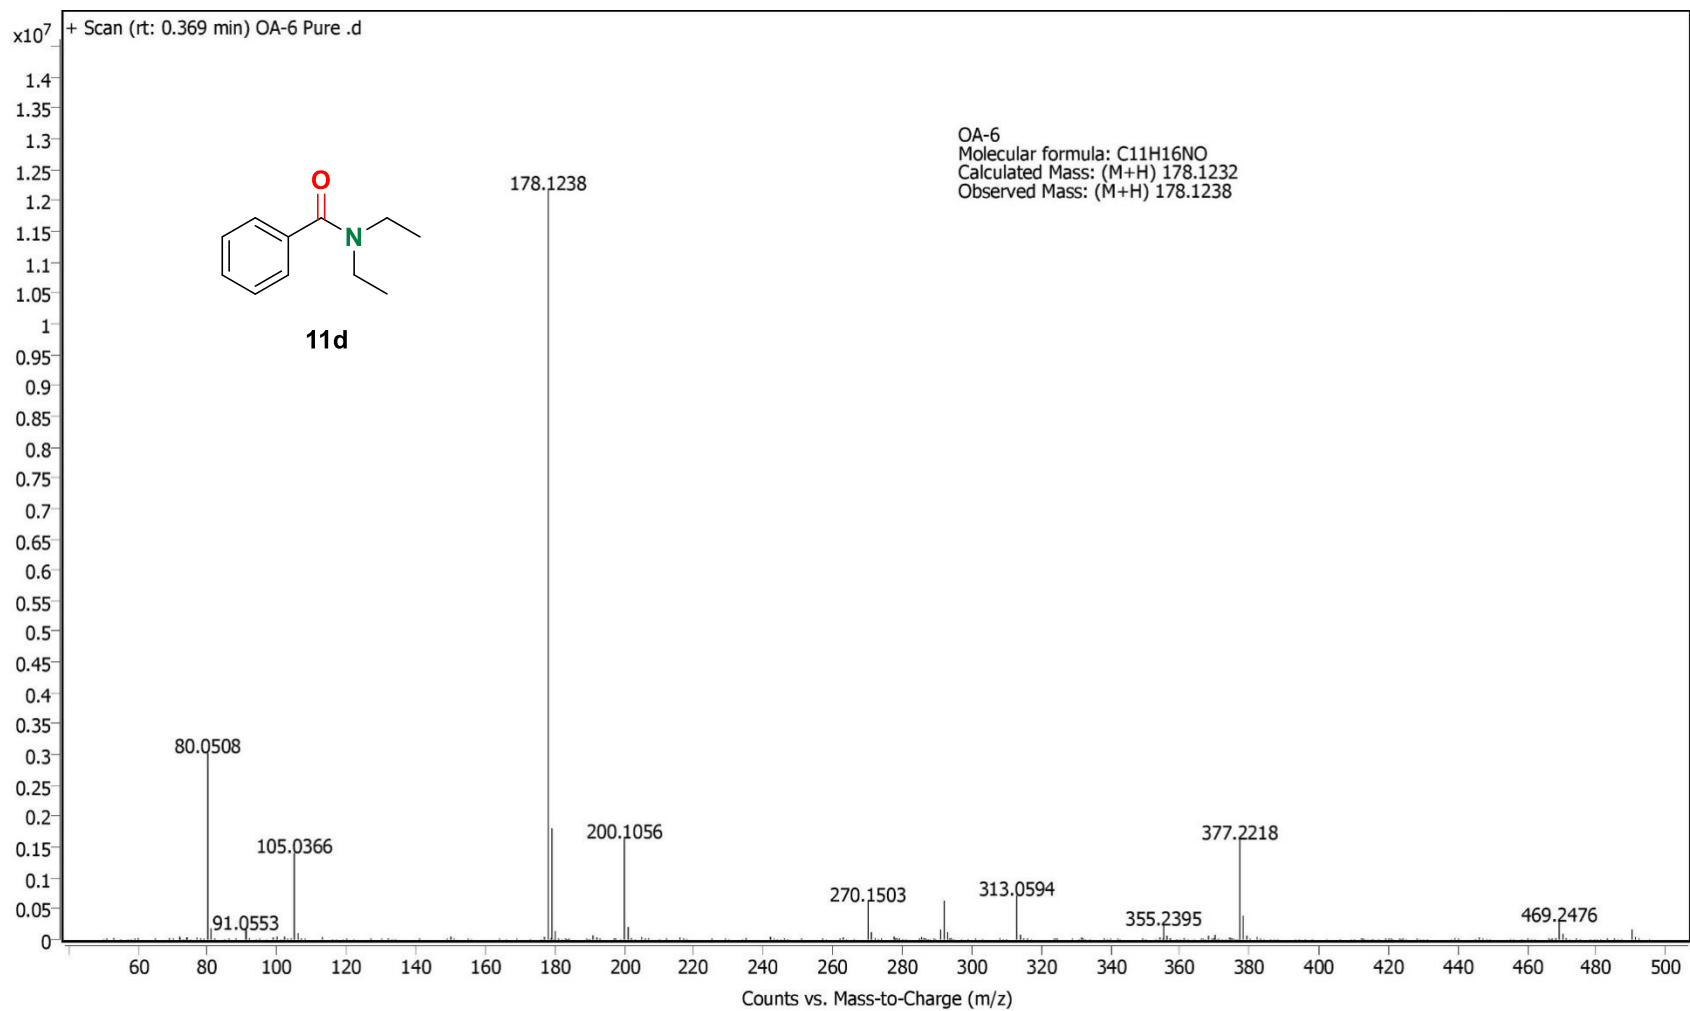

**Figure S145.** HRMS Spectrum of **11d**



OA-13 1H NMR

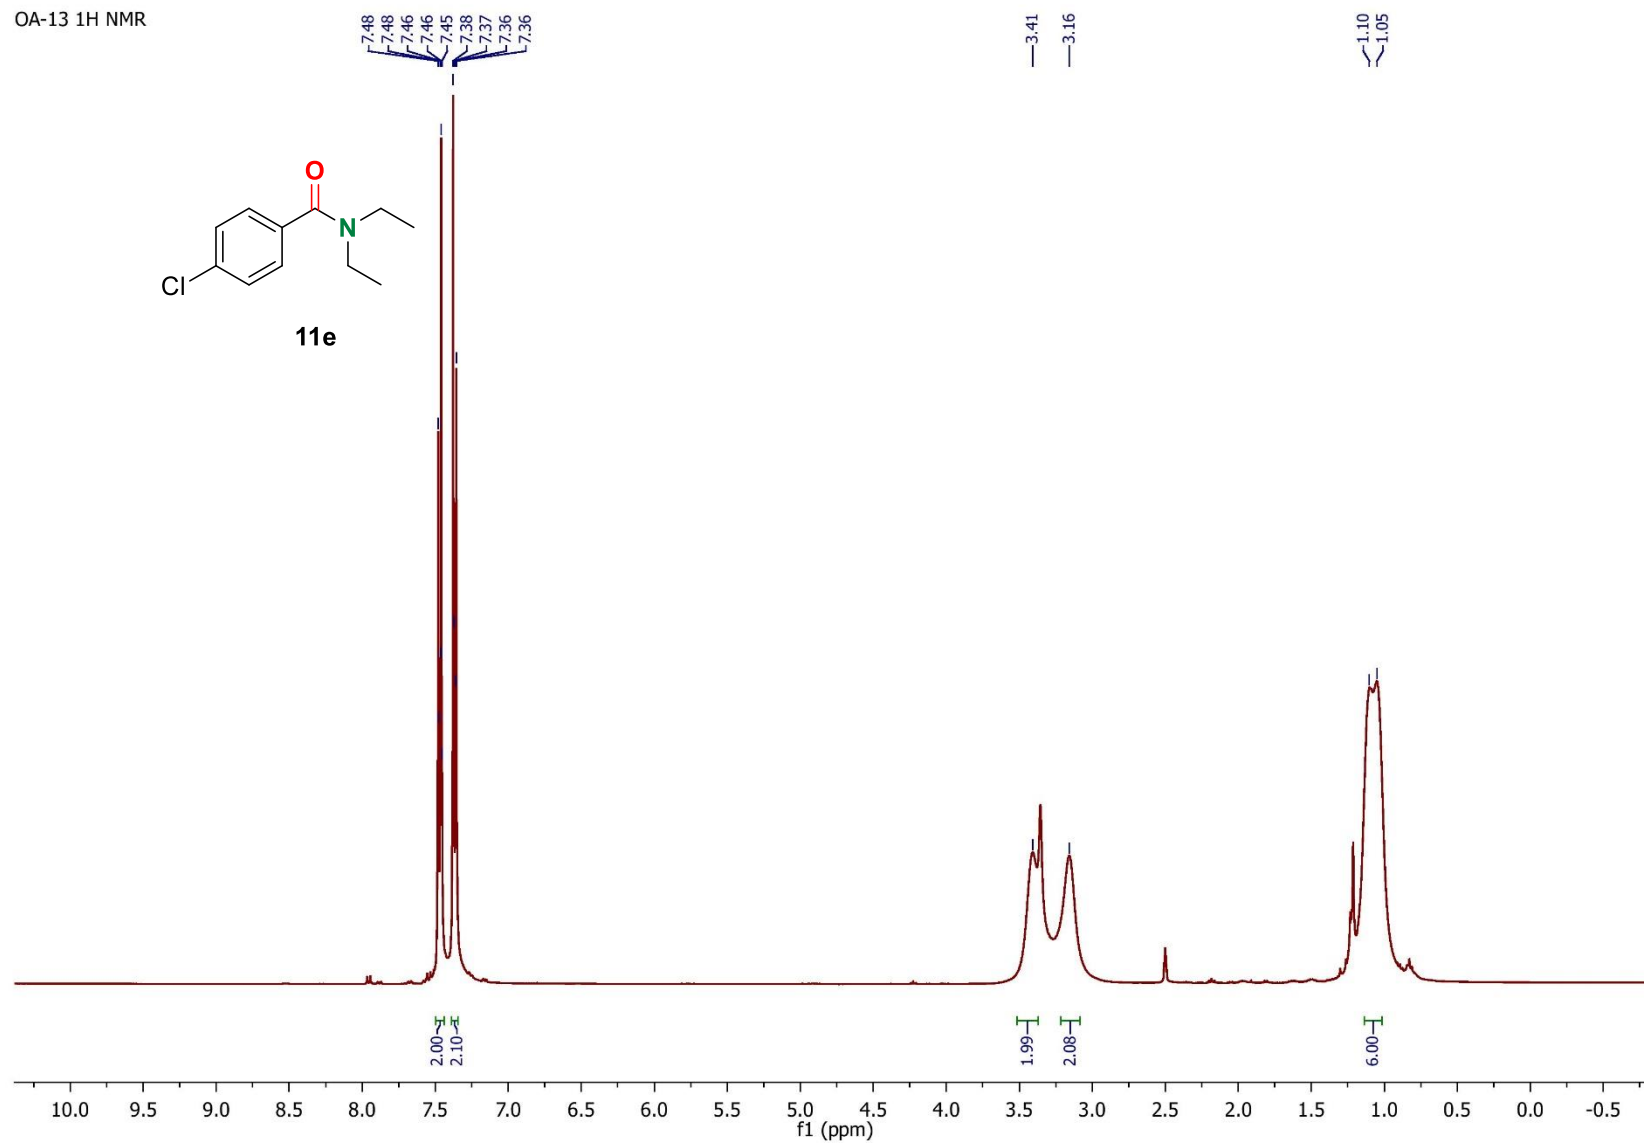

Figure S146. <sup>1</sup>H NMR Spectrum of 11e (400MHz, DMSO-d<sub>6</sub>)

OA-13 13C NMR

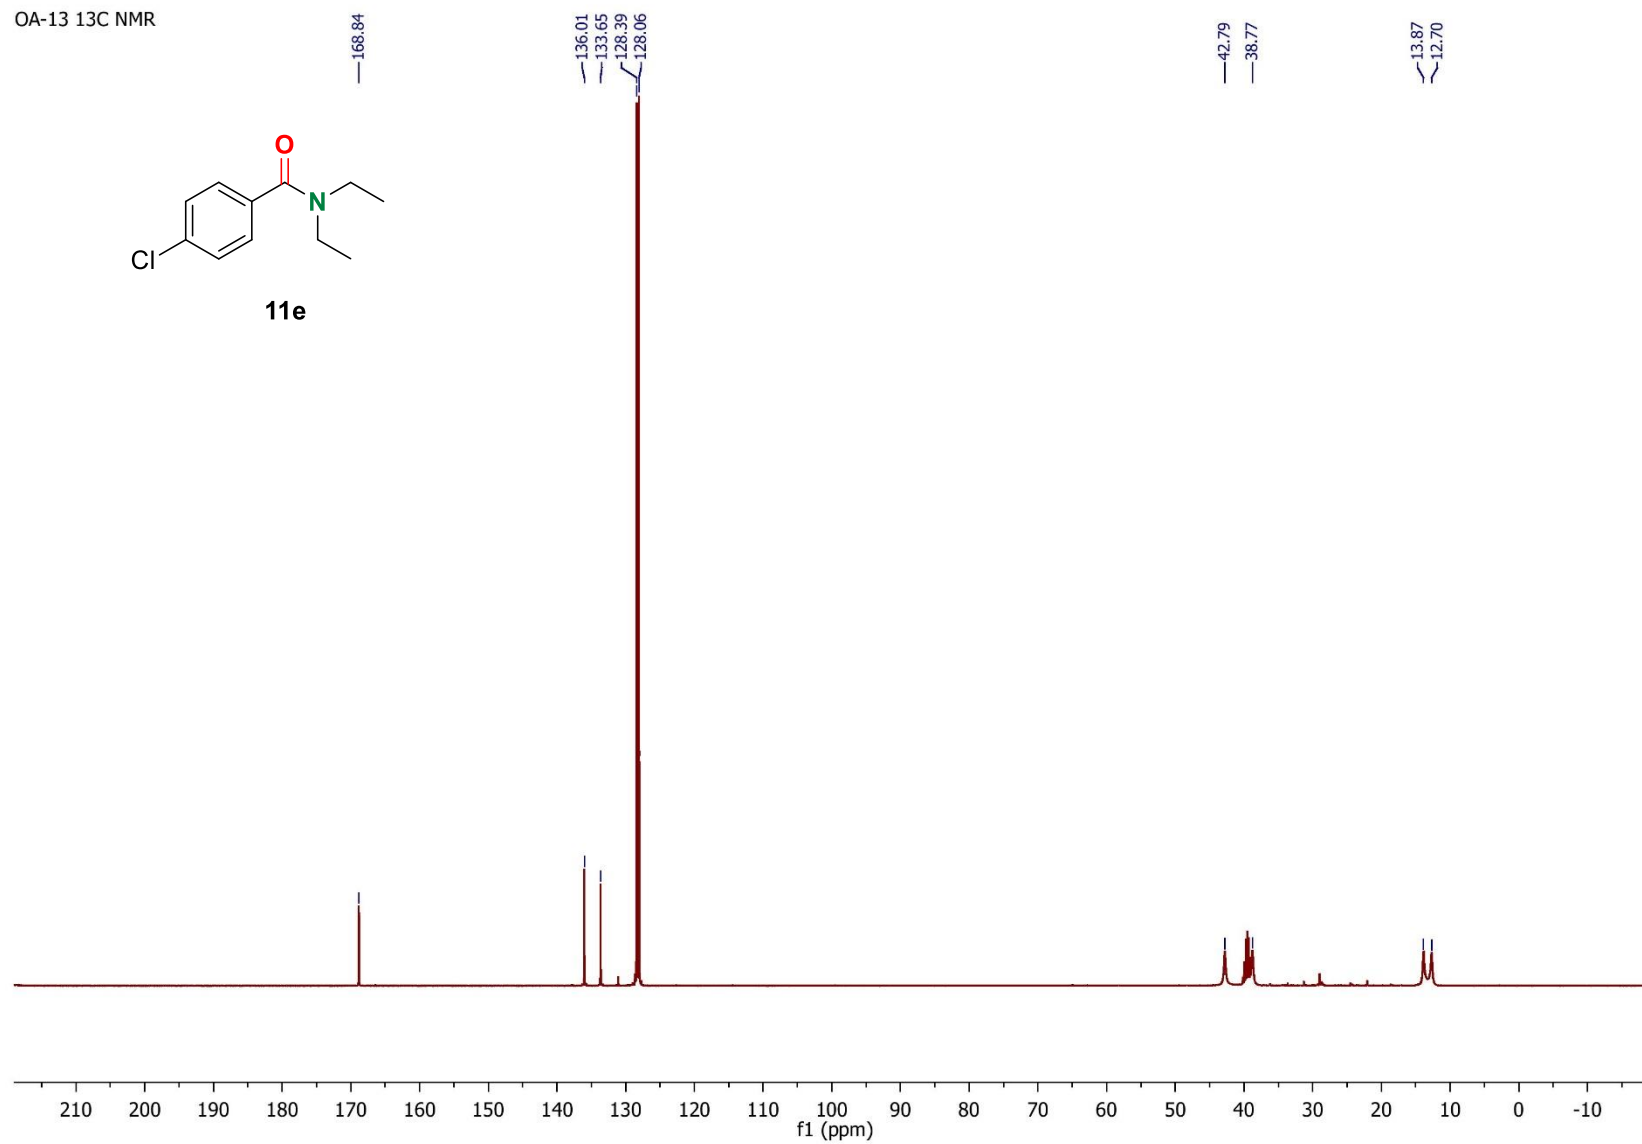

Figure S147. <sup>13</sup>C NMR Spectrum of 11e (101MHz, DMSO-d<sub>6</sub>)

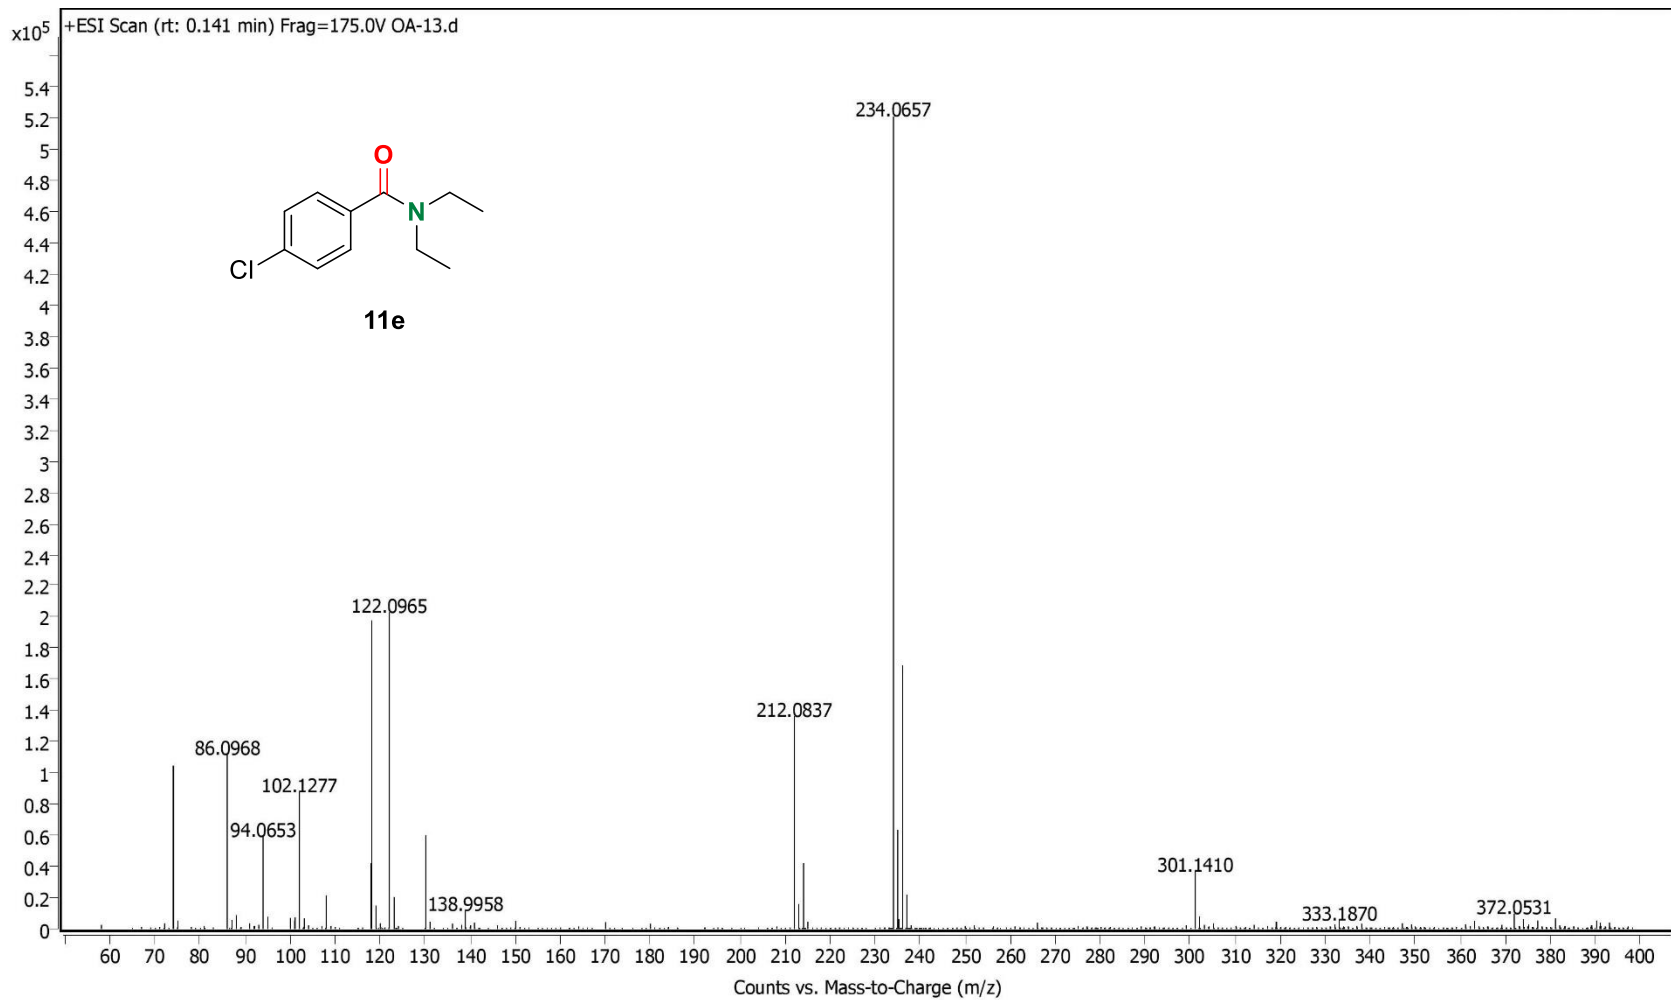

**Figure S148.** HRMS Spectrum of **11e**

AE-3 1H NMR

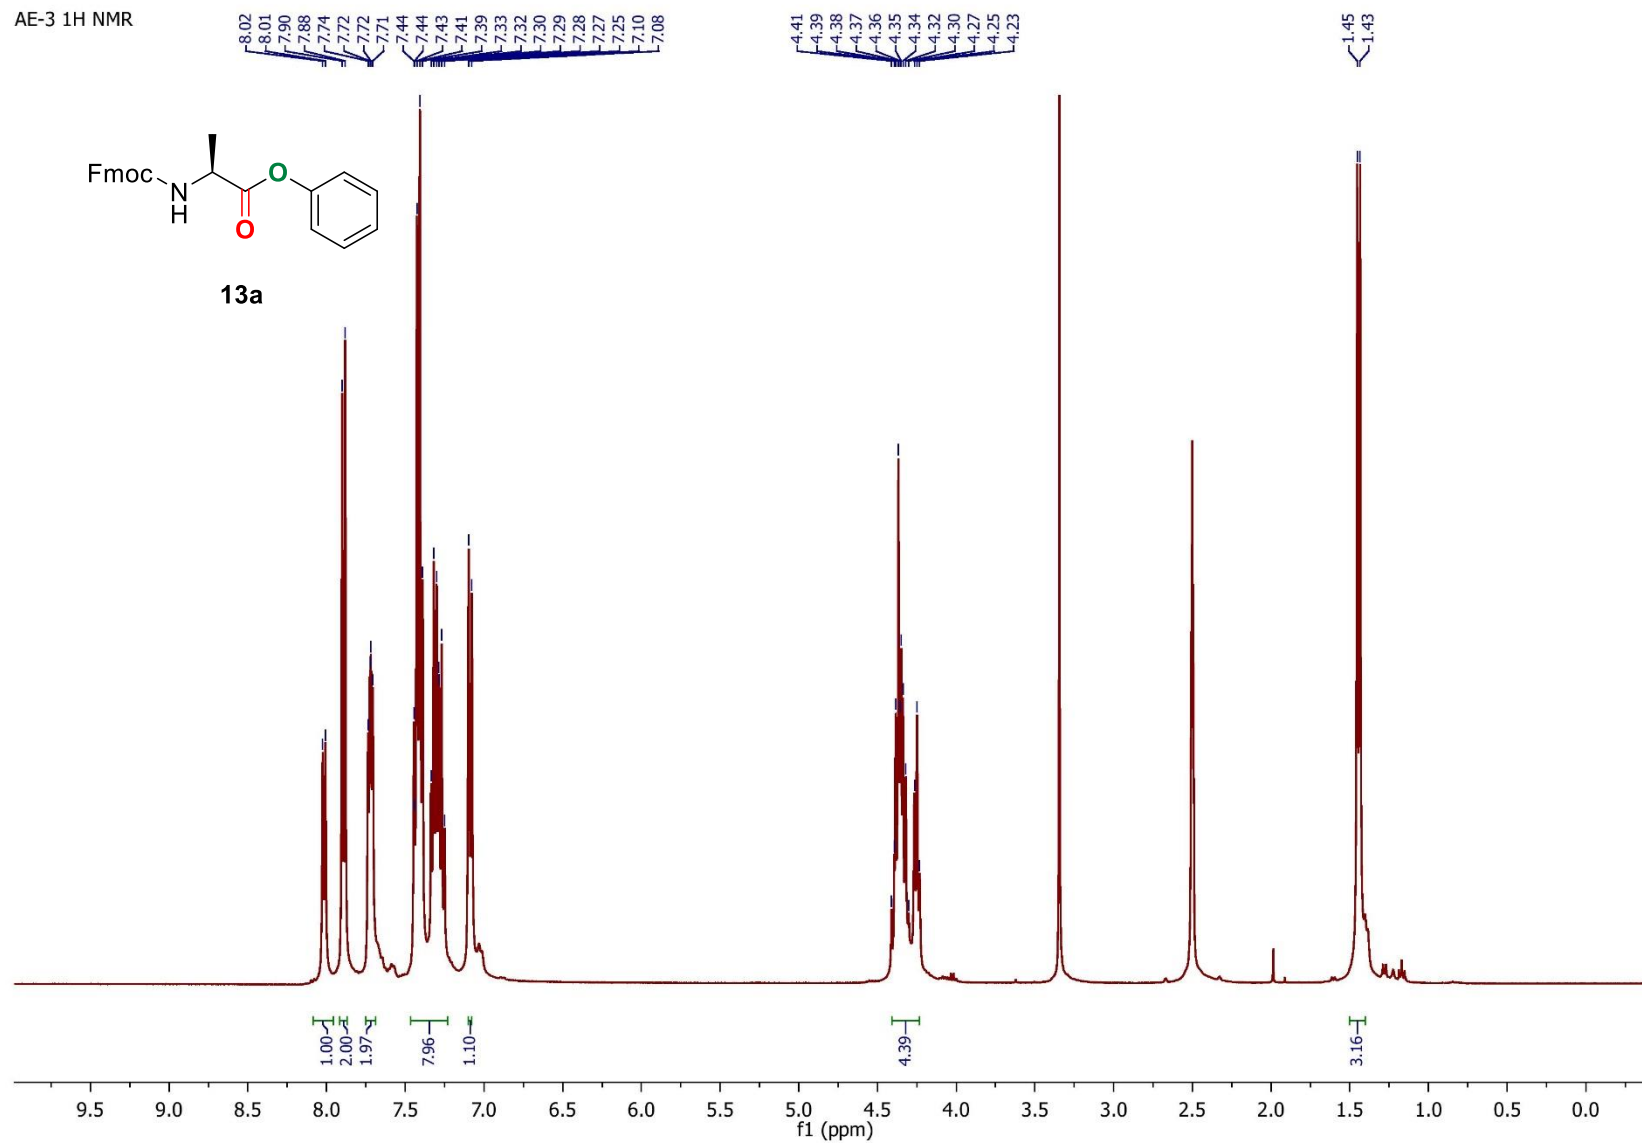

Figure S149. <sup>1</sup>H NMR Spectrum of 13a (400MHz, DMSO-d<sub>6</sub>)

AE-3 13C NMR

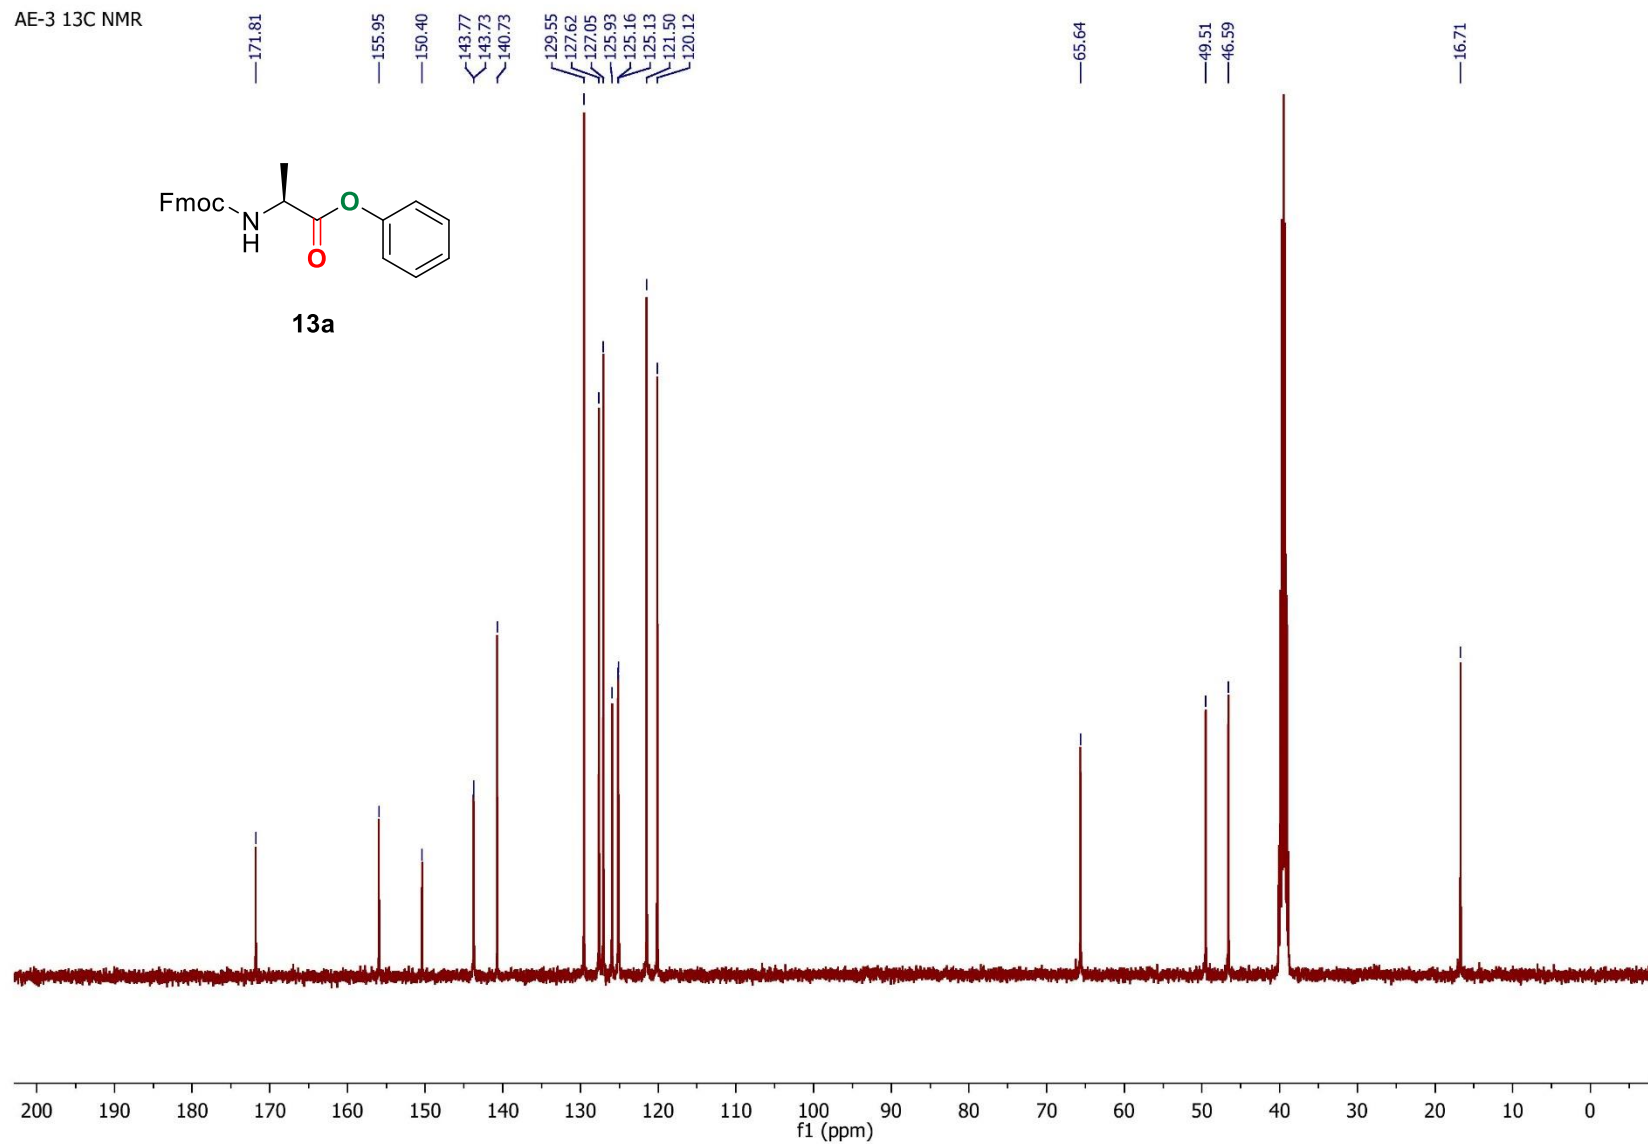

Figure S150. <sup>13</sup>C NMR Spectrum of 13a (101MHz, DMSO-d<sub>6</sub>)

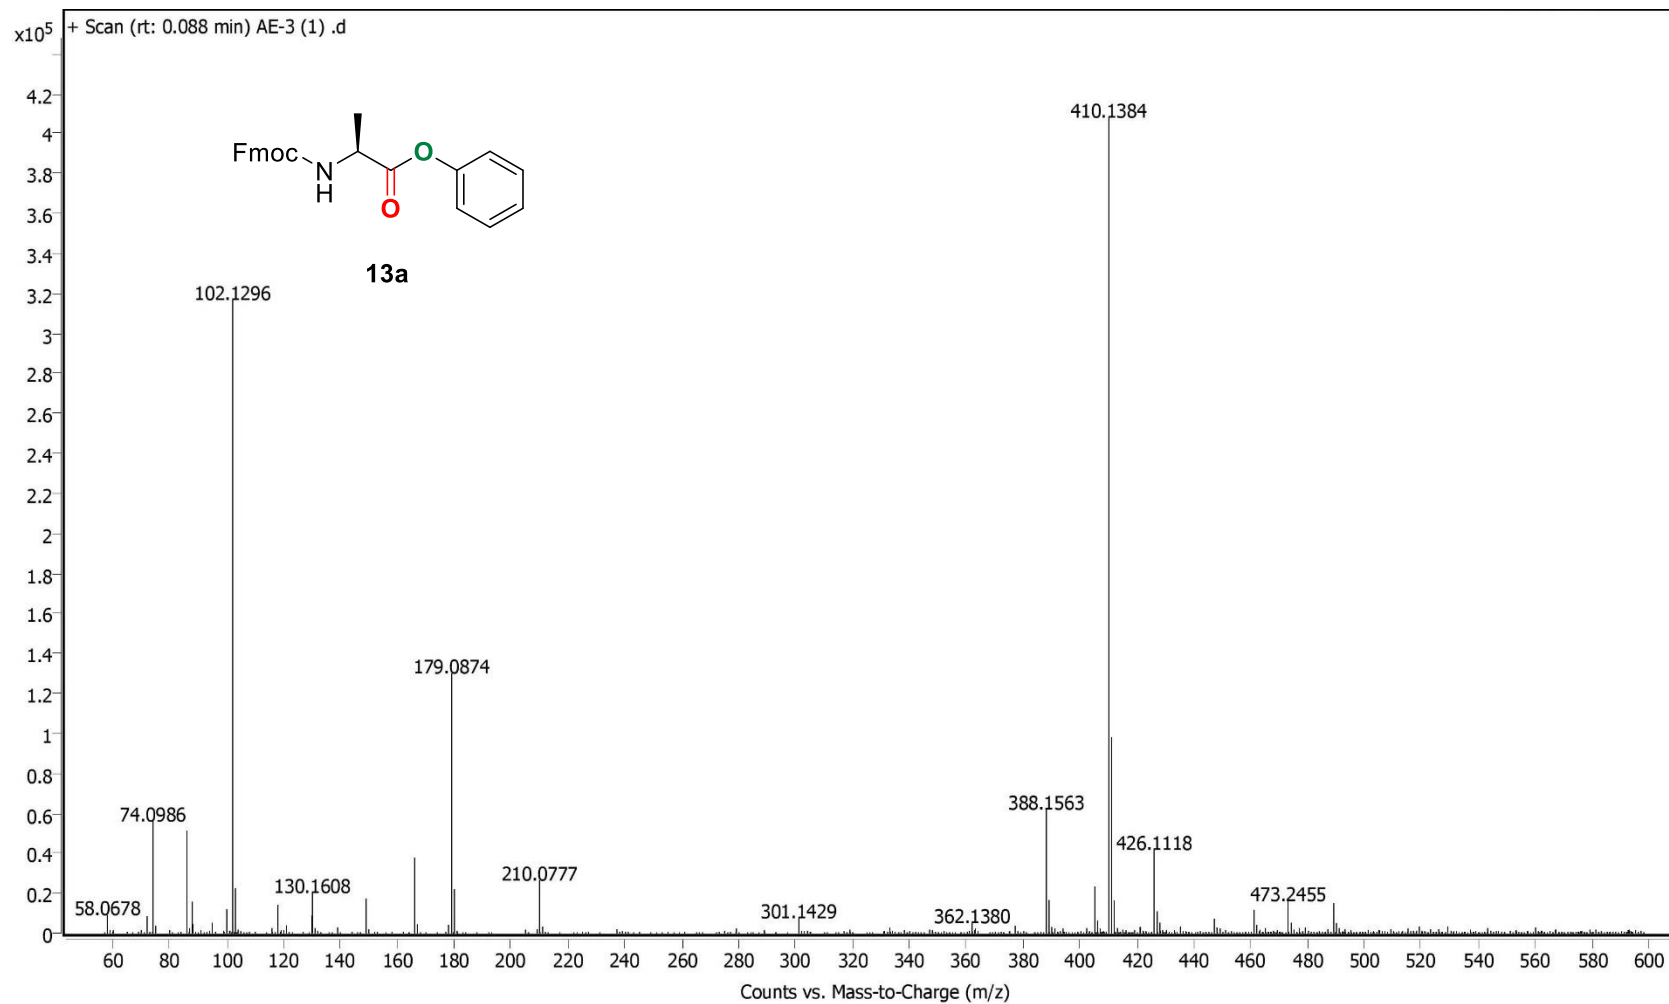

**Figure S151.** HRMS Spectrum of **13a**

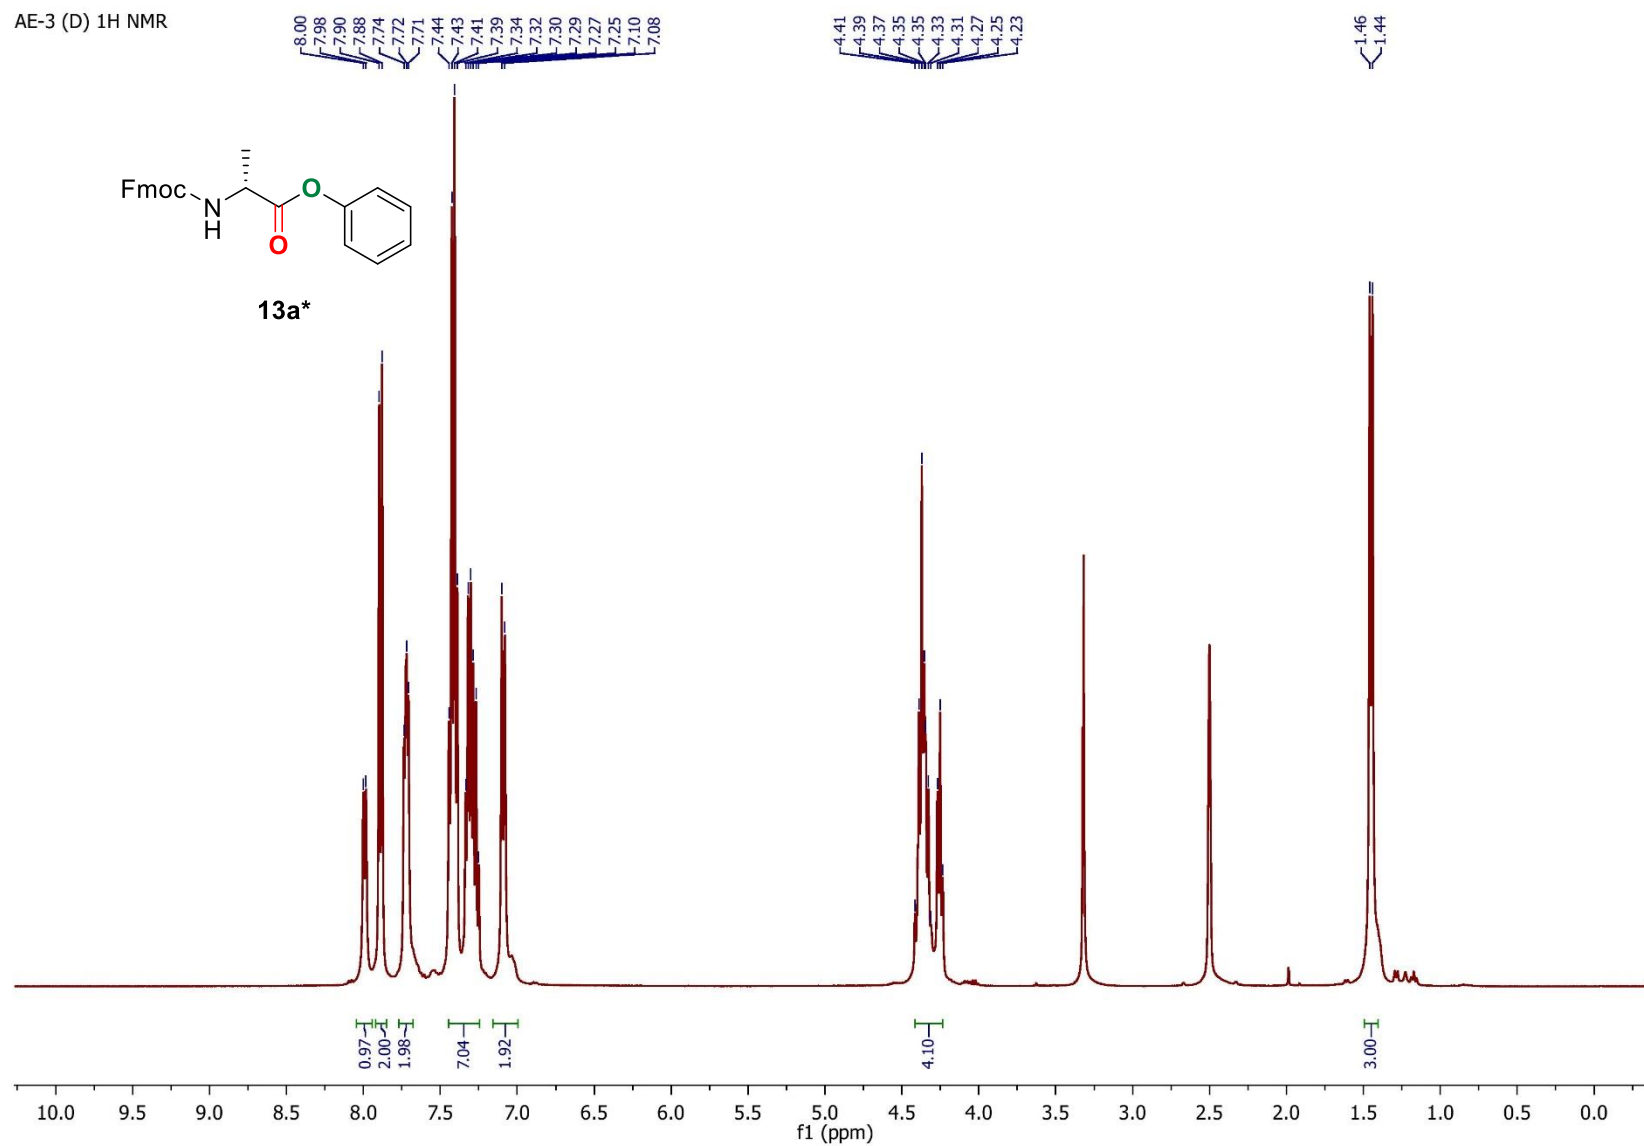

Figure S152. <sup>1</sup>H NMR Spectrum of 13a\* (400MHz, DMSO-d<sub>6</sub>)

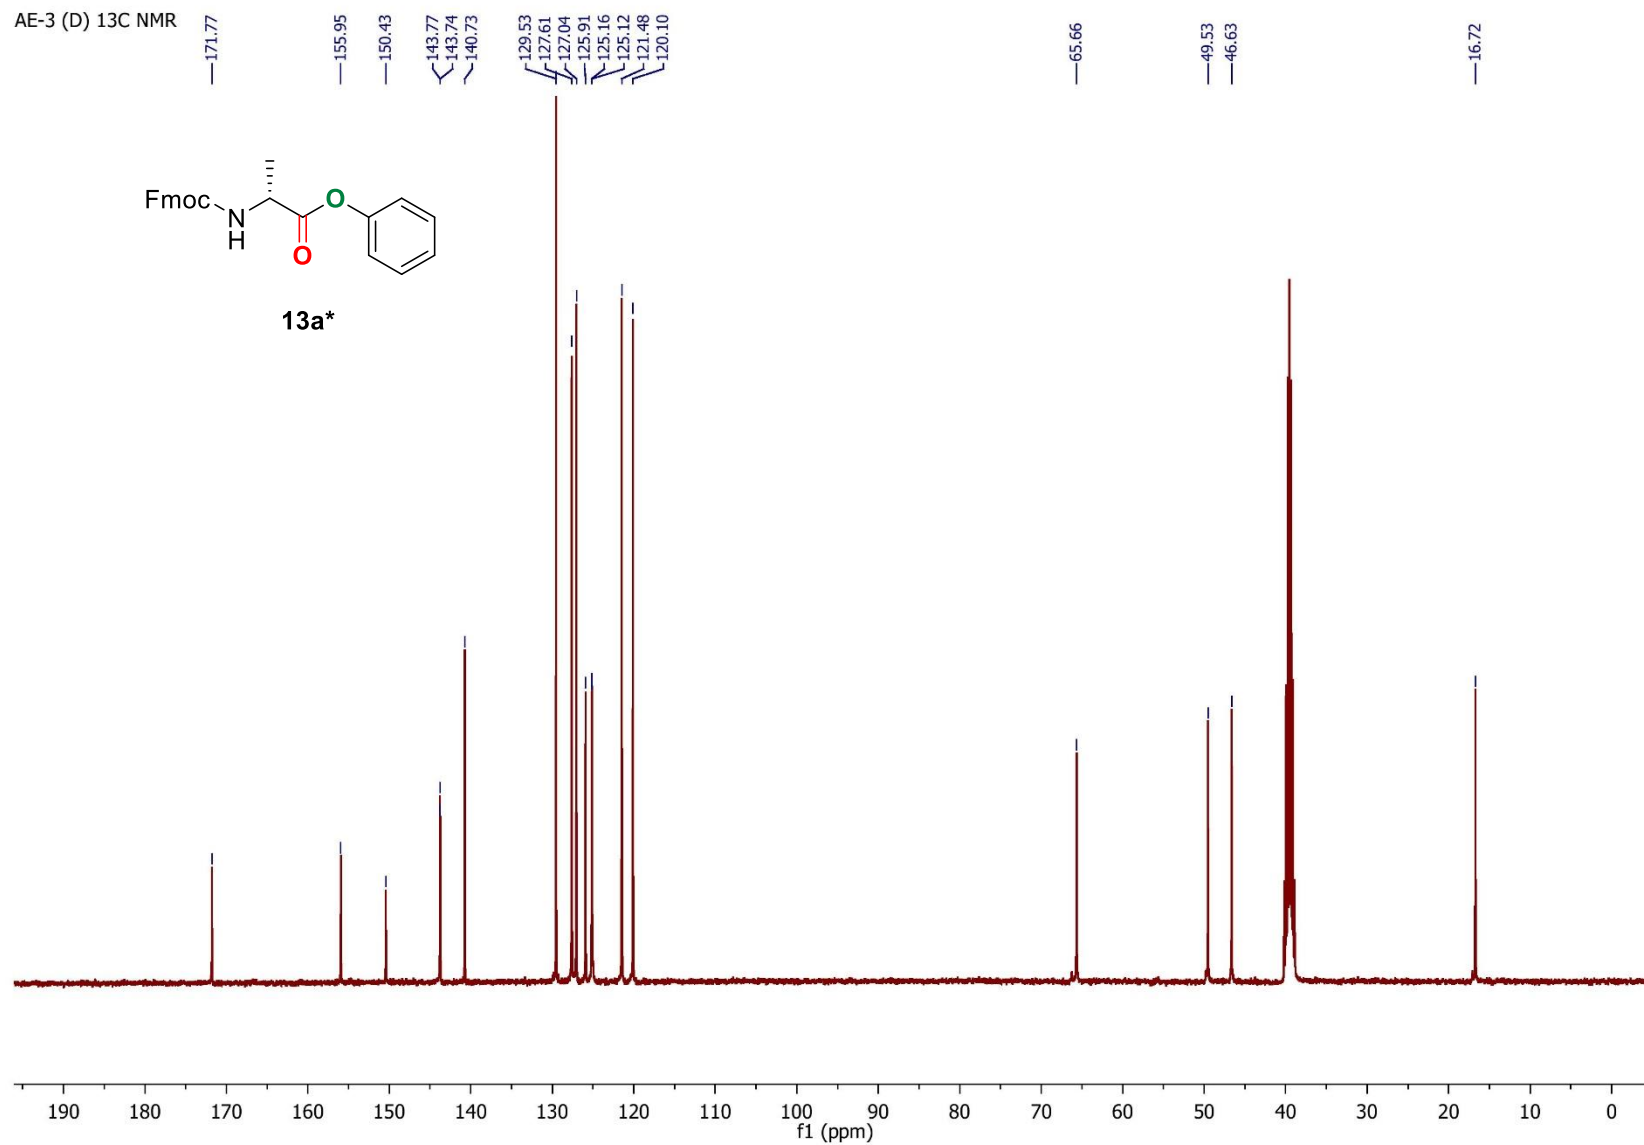

**Figure S153.**  $^{13}\text{C}$  NMR Spectrum of **13a\*** (101MHz, DMSO- $\text{d}_6$ )



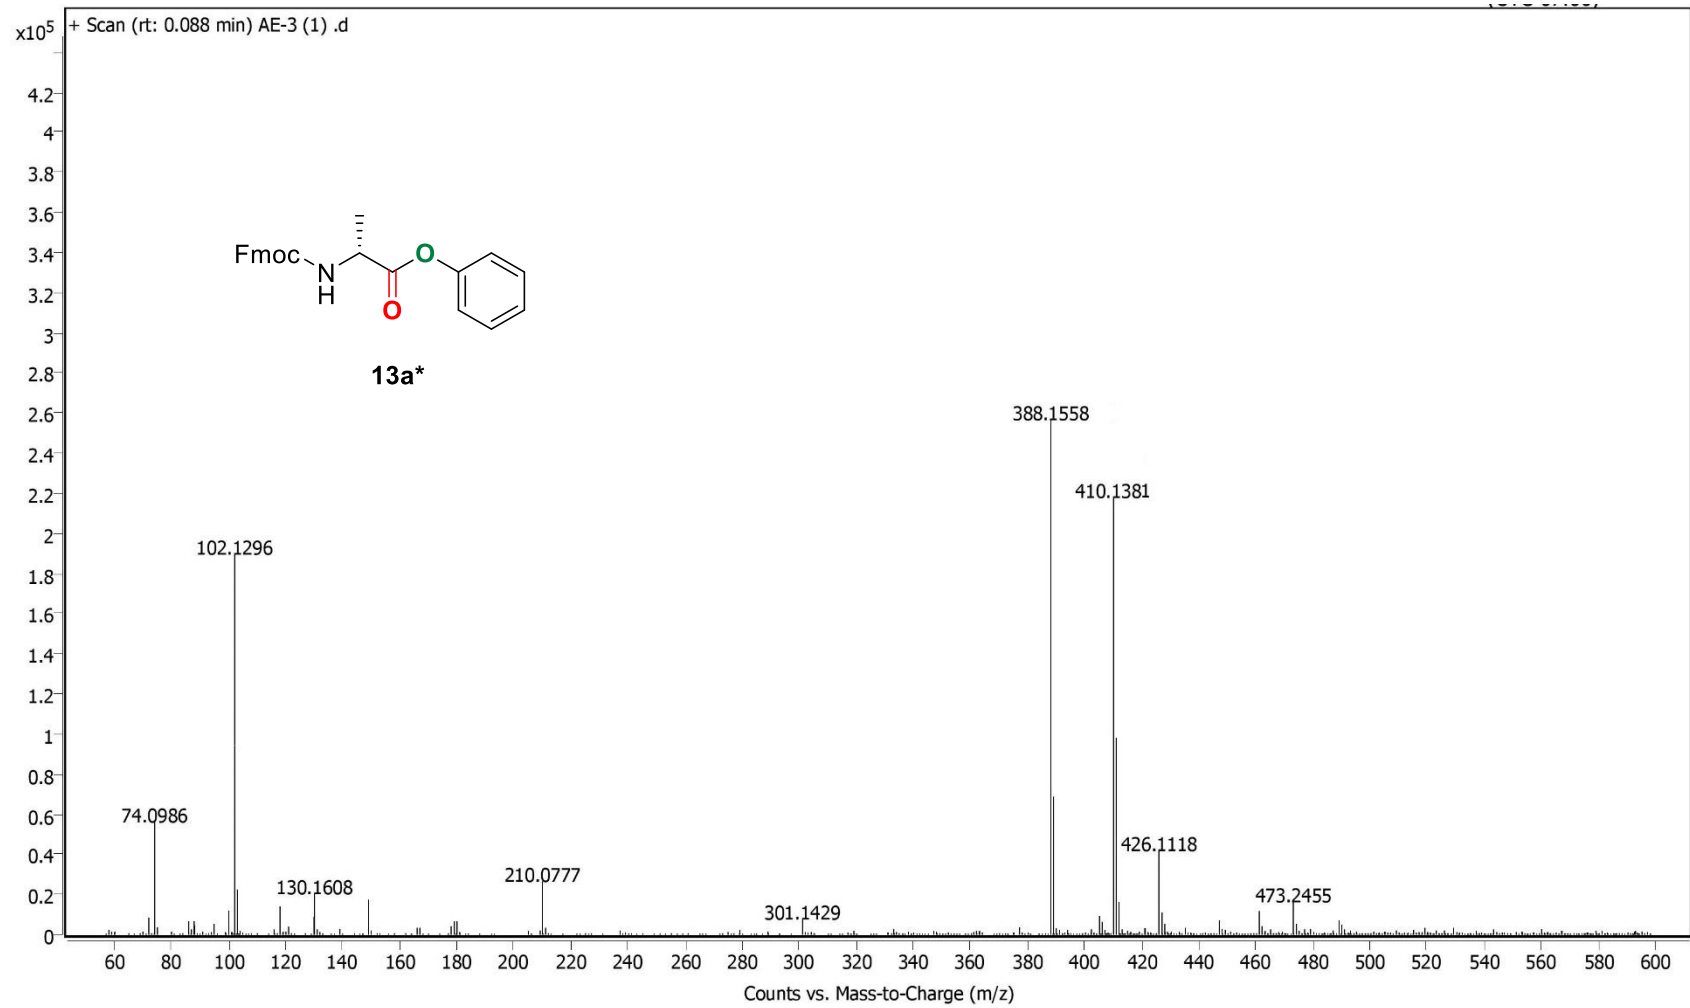

**Figure S154.** HRMS Spectrum of **13a\***

AE-2 1H NMR

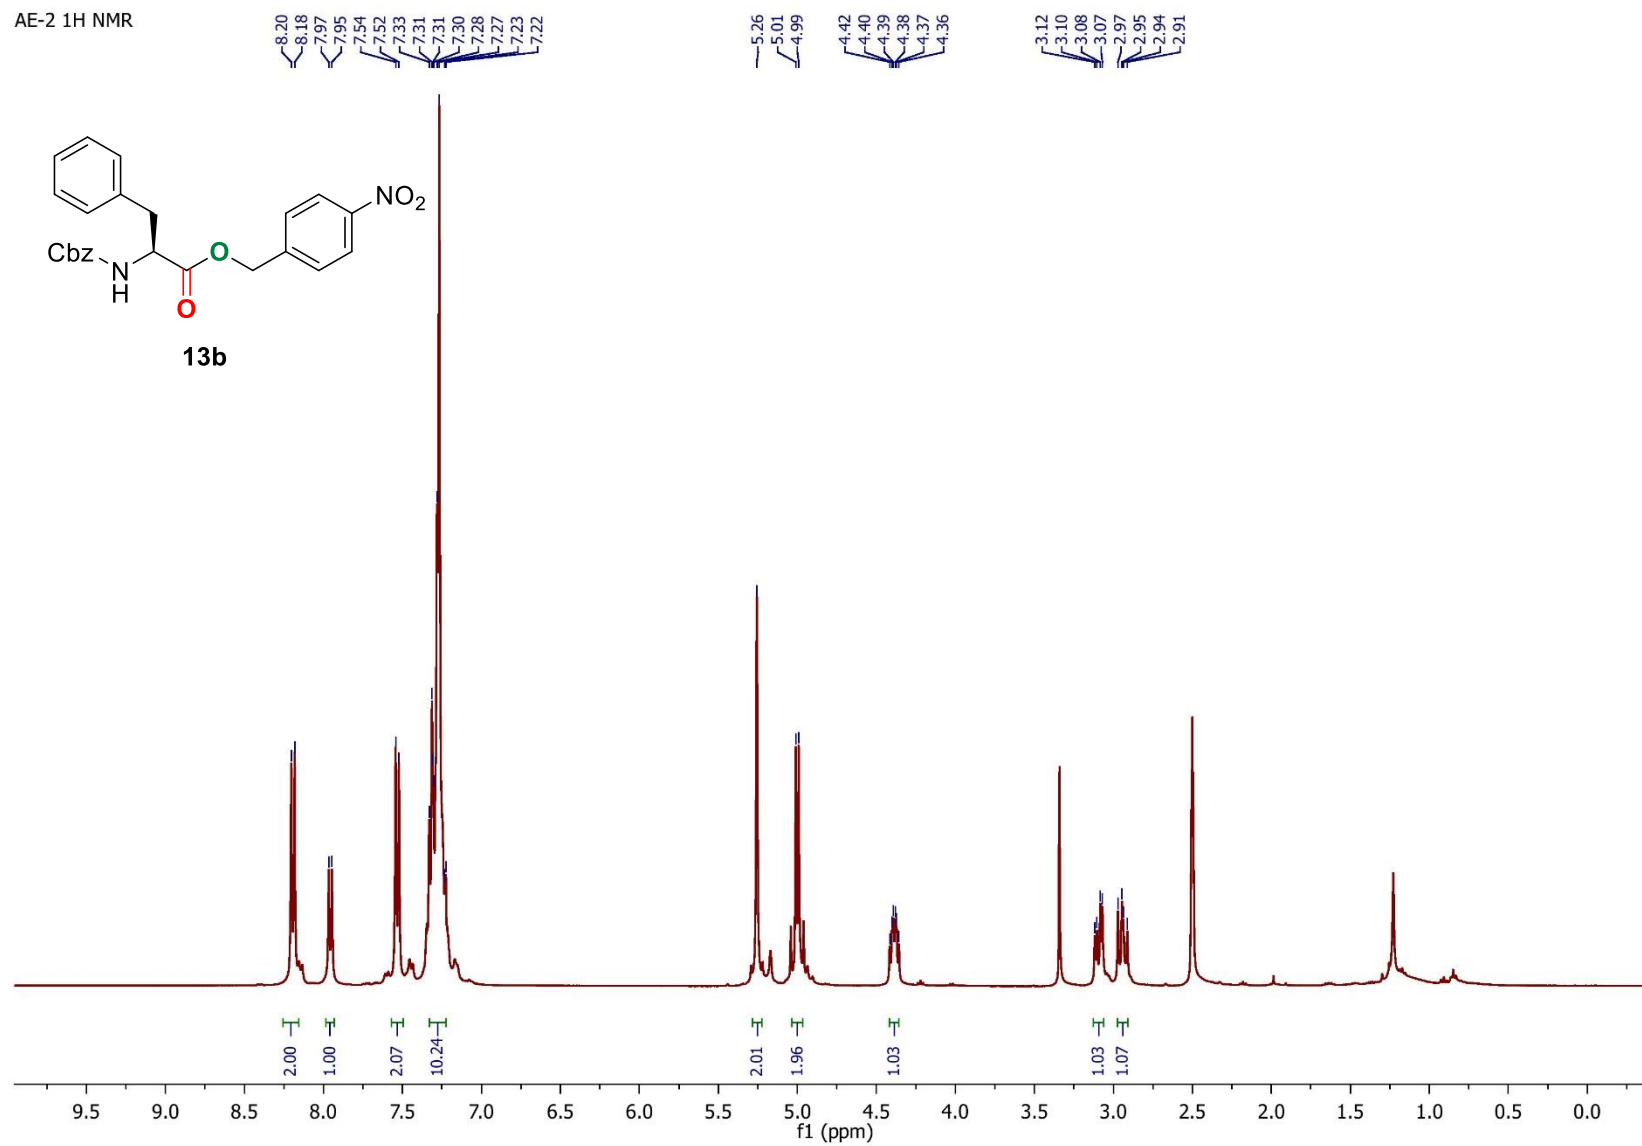

Figure S155. <sup>1</sup>H NMR Spectrum of 13b (400MHz, DMSO-d<sub>6</sub>)

AE-2 13C NMR

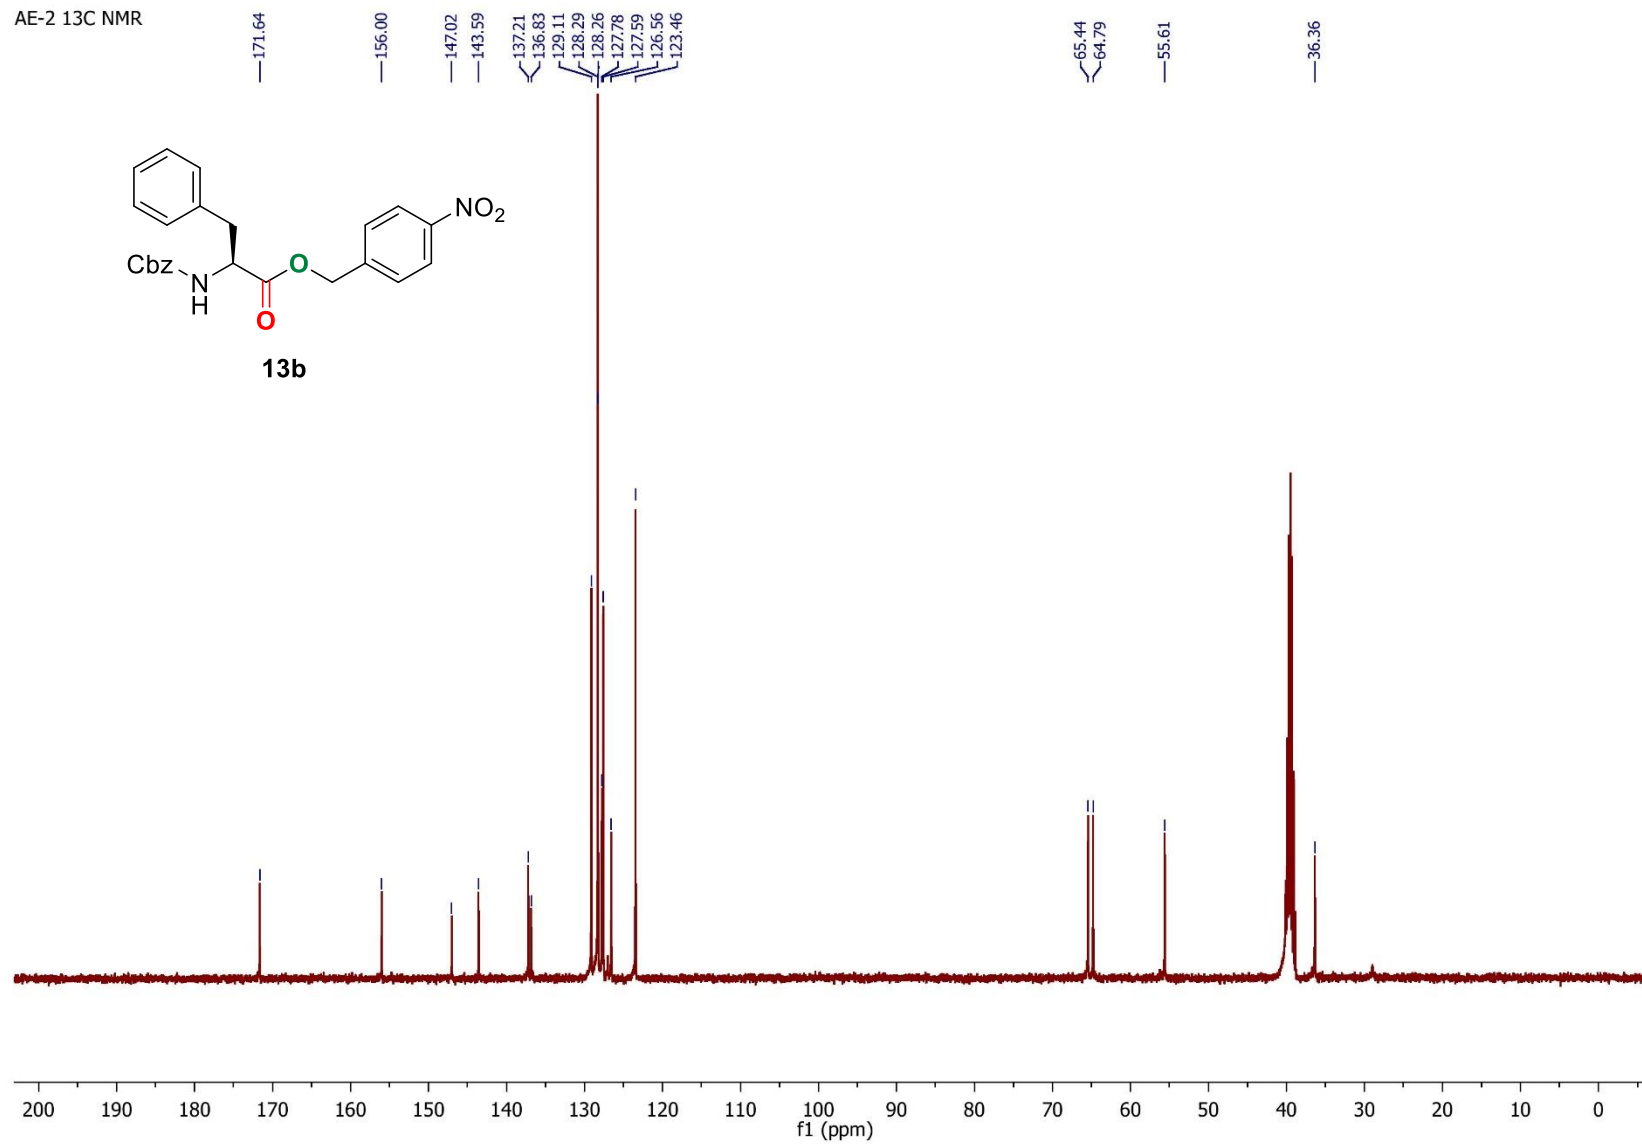

Figure S156.  $^{13}\text{C}$  NMR Spectrum of **13b**(101MHz, DMSO- $\text{d}_6$ )

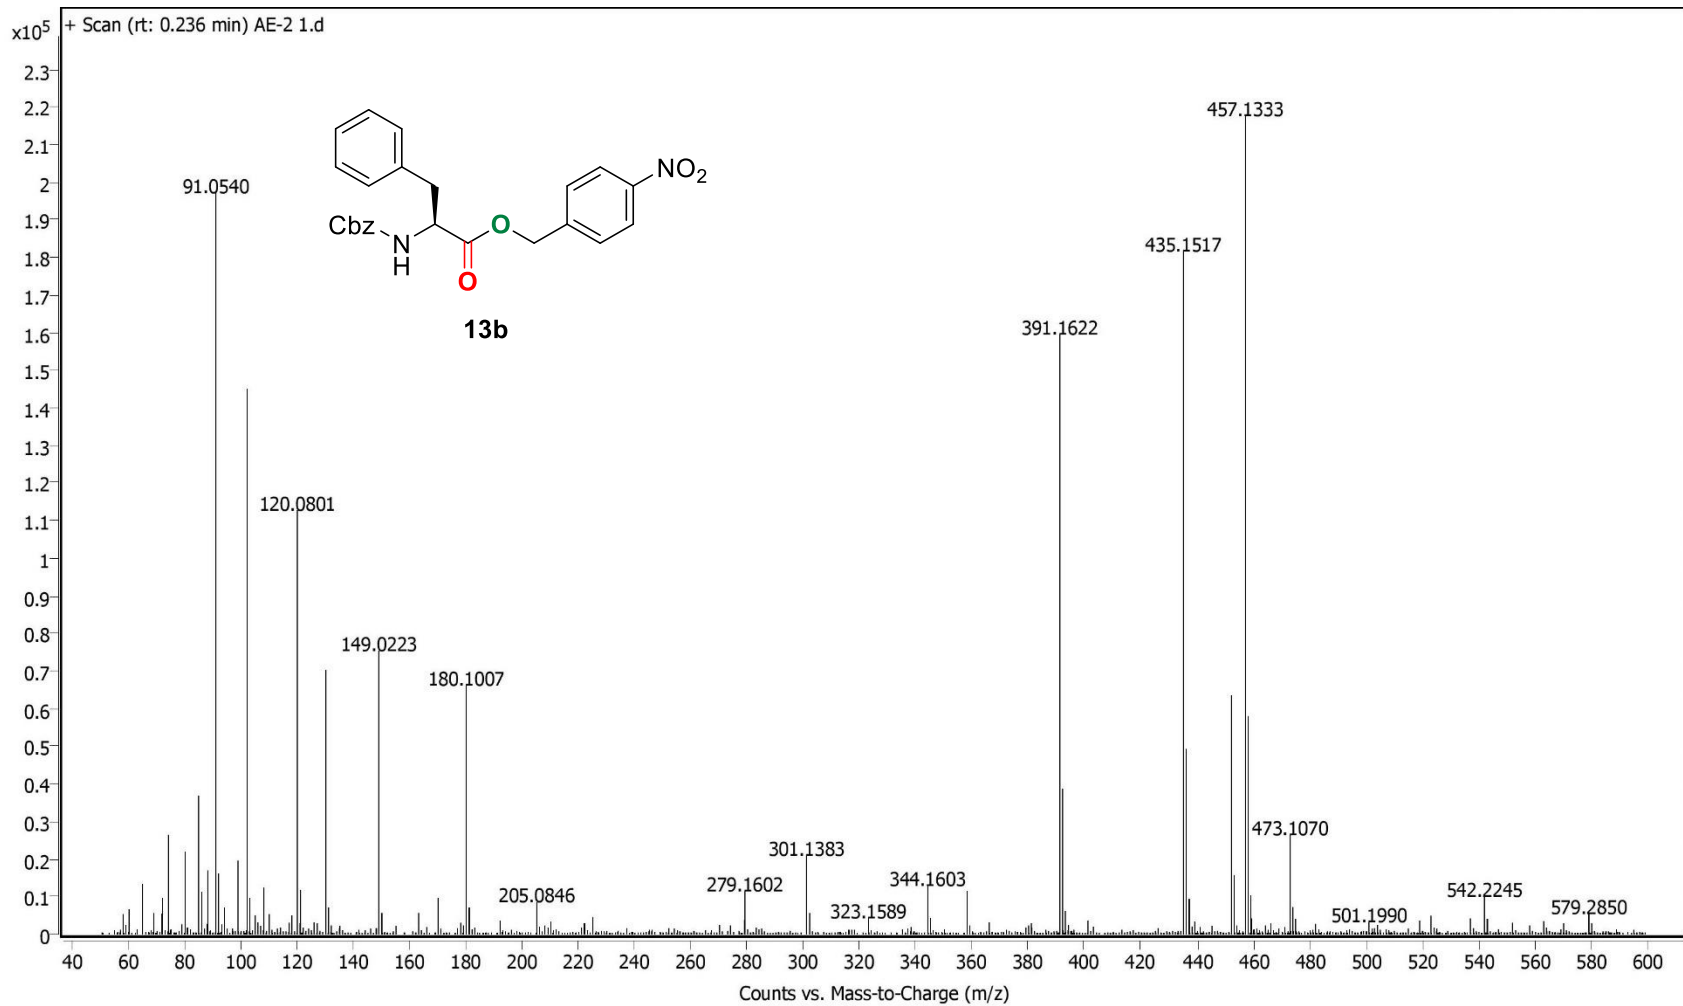

**Figure S157.** HRMS Spectrum of **13b**

AE-1 1H NMR

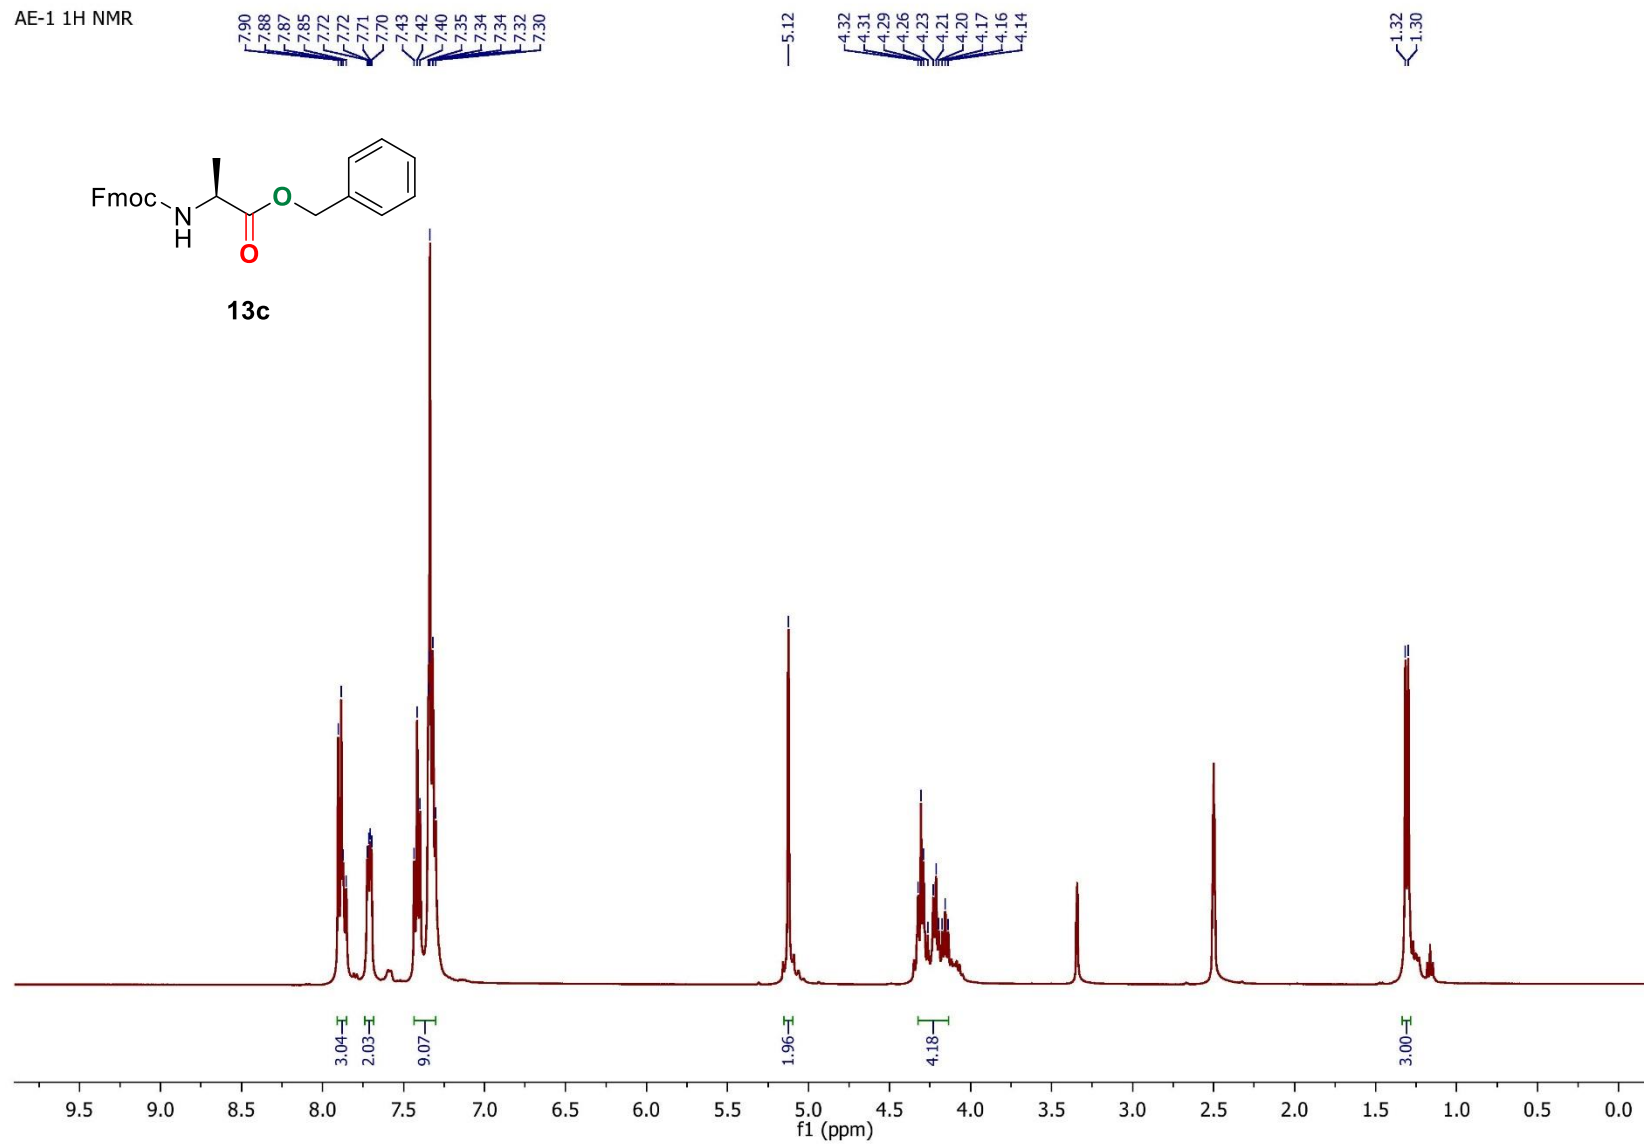

Figure S158. <sup>1</sup>H NMR Spectrum of **13c** (400MHz, DMSO-d<sub>6</sub>)



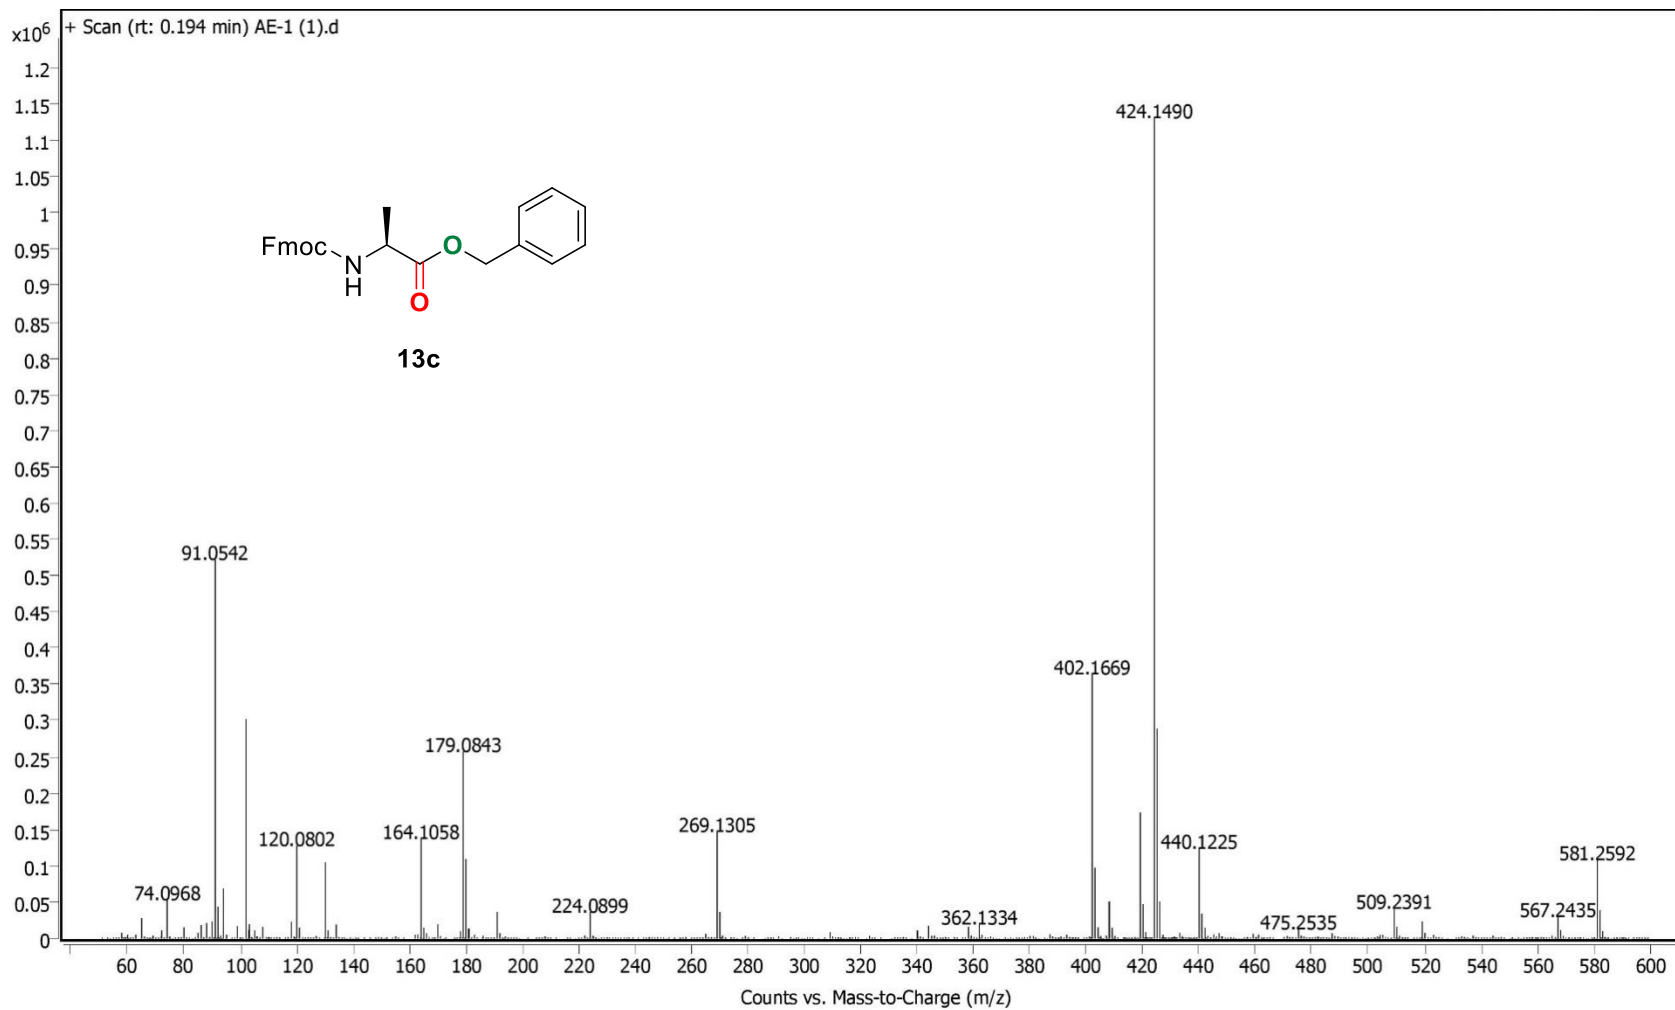

**Figure S160.** HRMS Spectrum of **13c**

AE-5 1H NMR

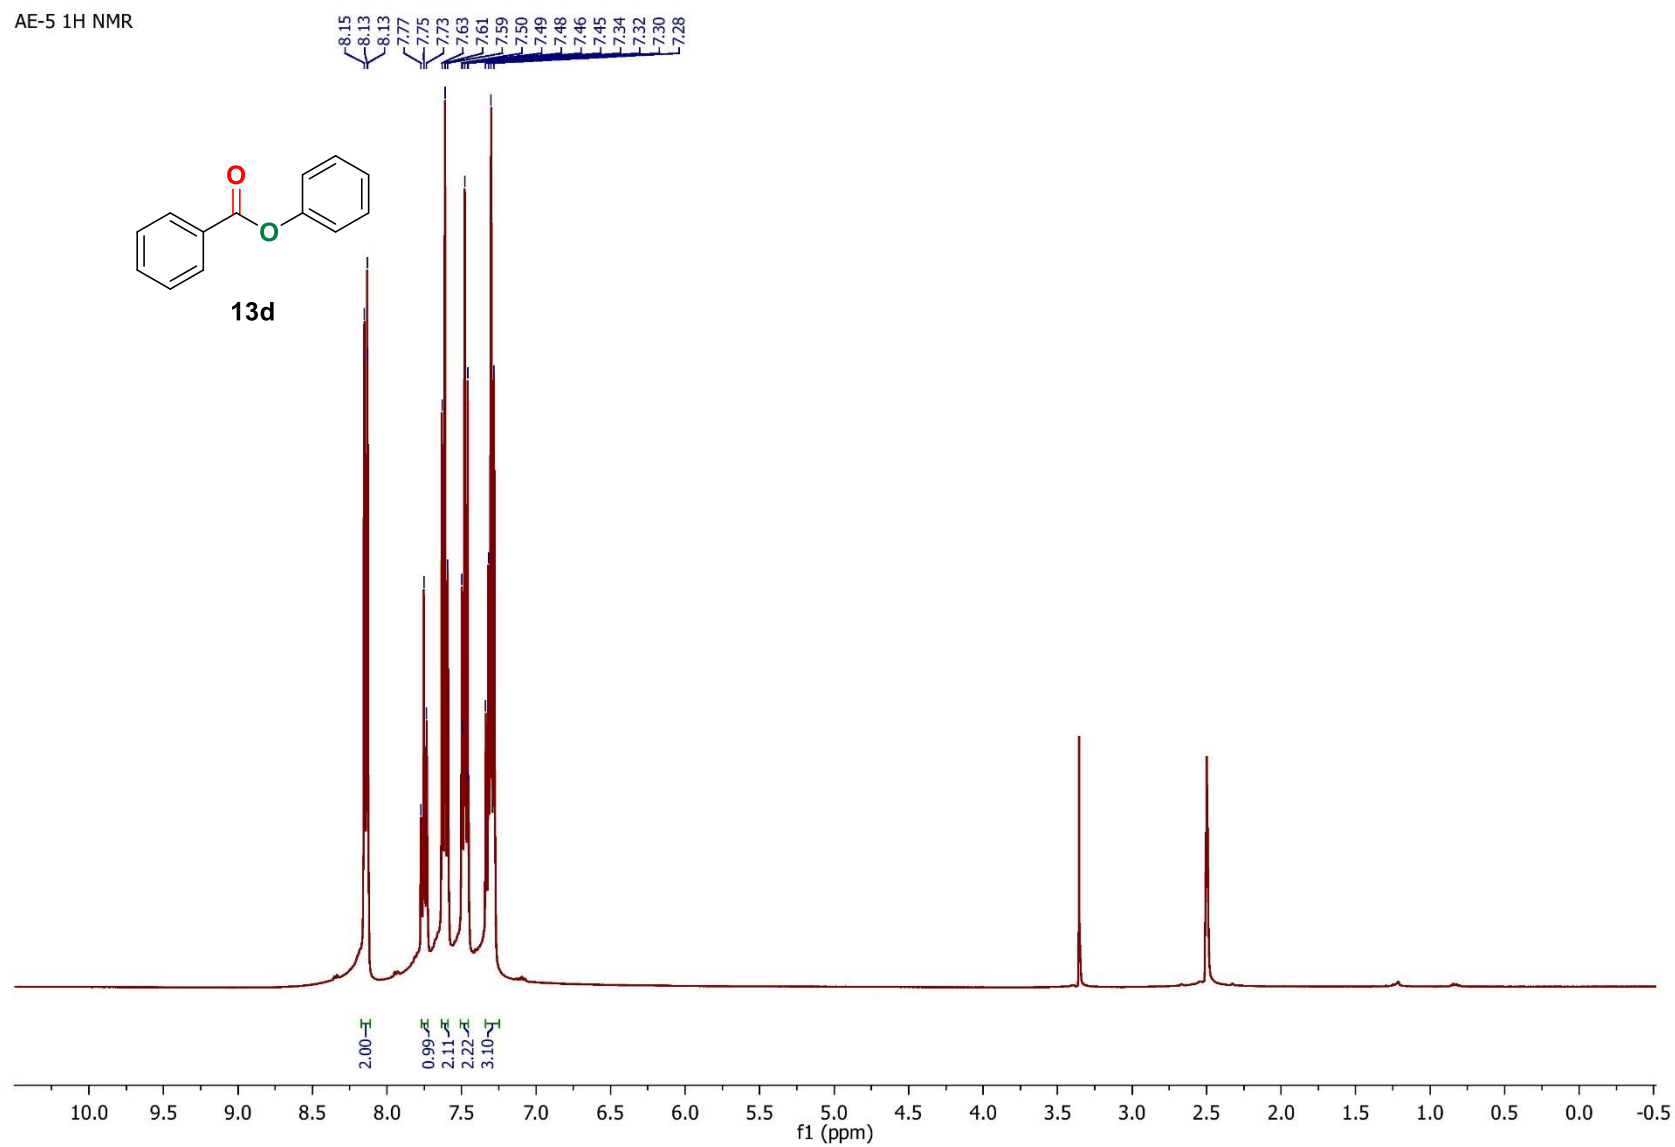

Figure S161. <sup>1</sup>H NMR Spectrum of 13d (400MHz, DMSO-d<sub>6</sub>)



AE-5 13C NMR

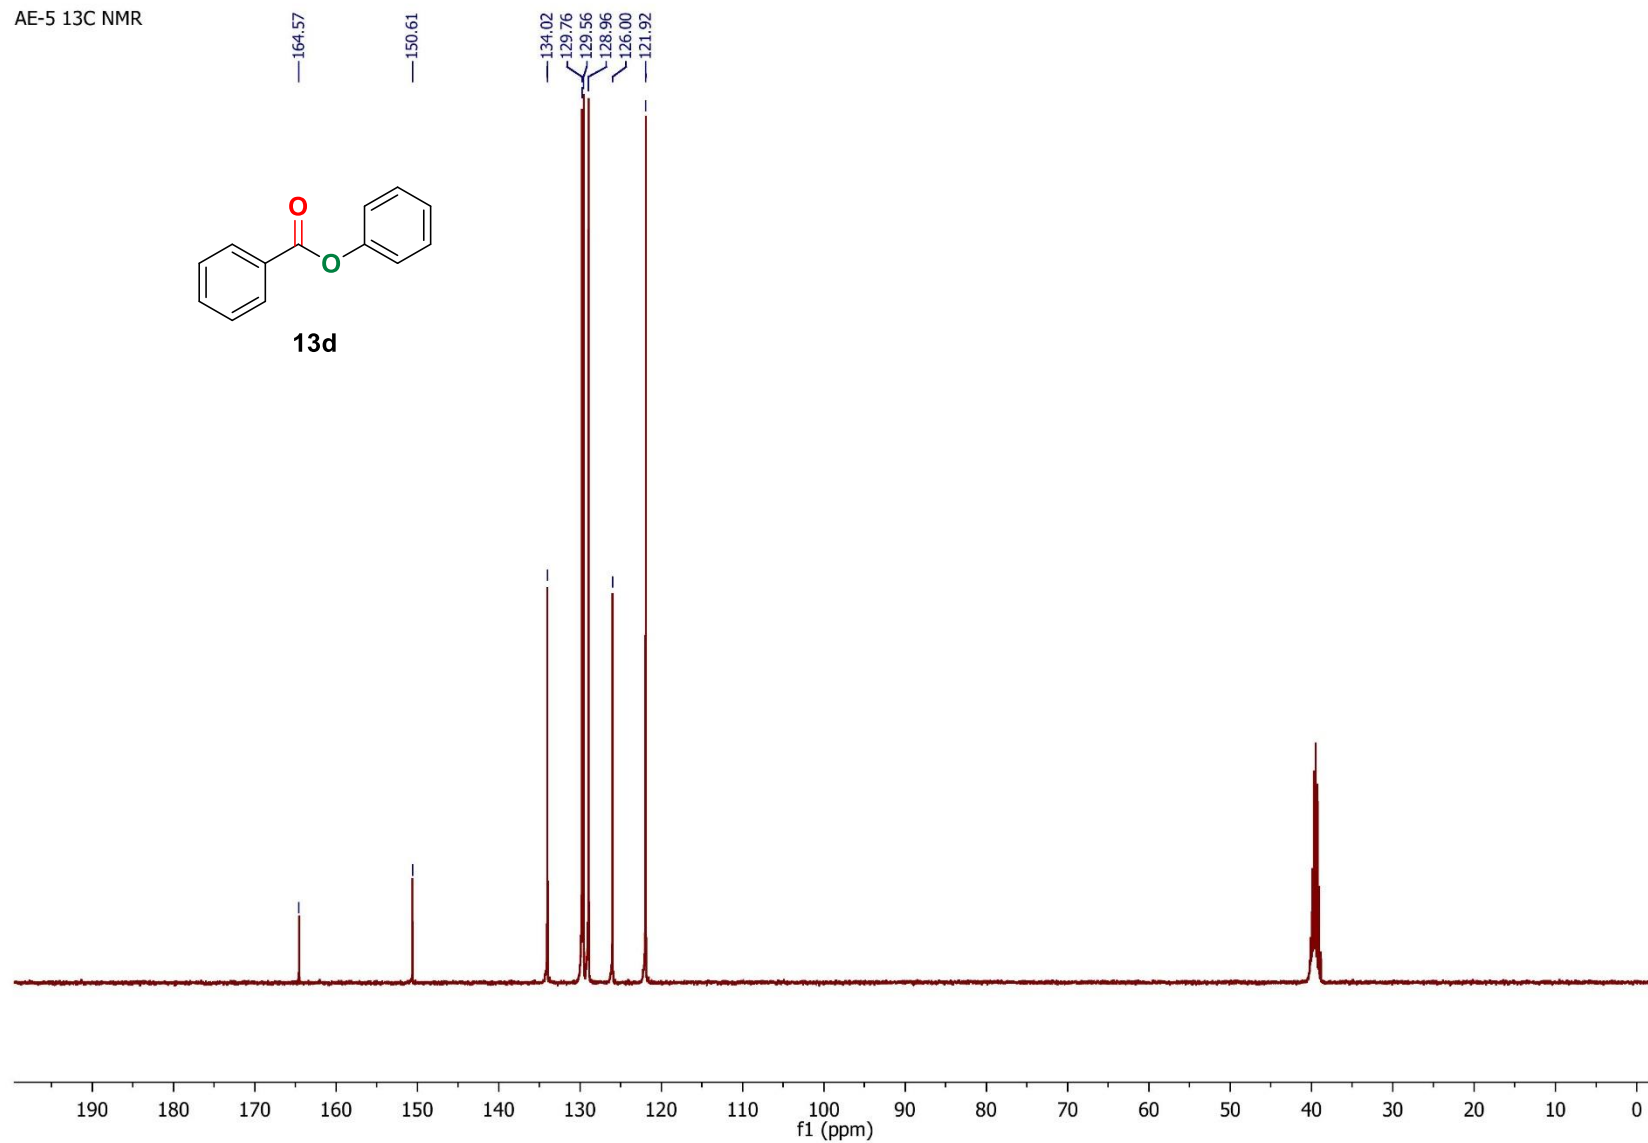

**Figure S162.** <sup>13</sup>C NMR Spectrum of **13d** (101MHz, DMSO-d<sub>6</sub>)

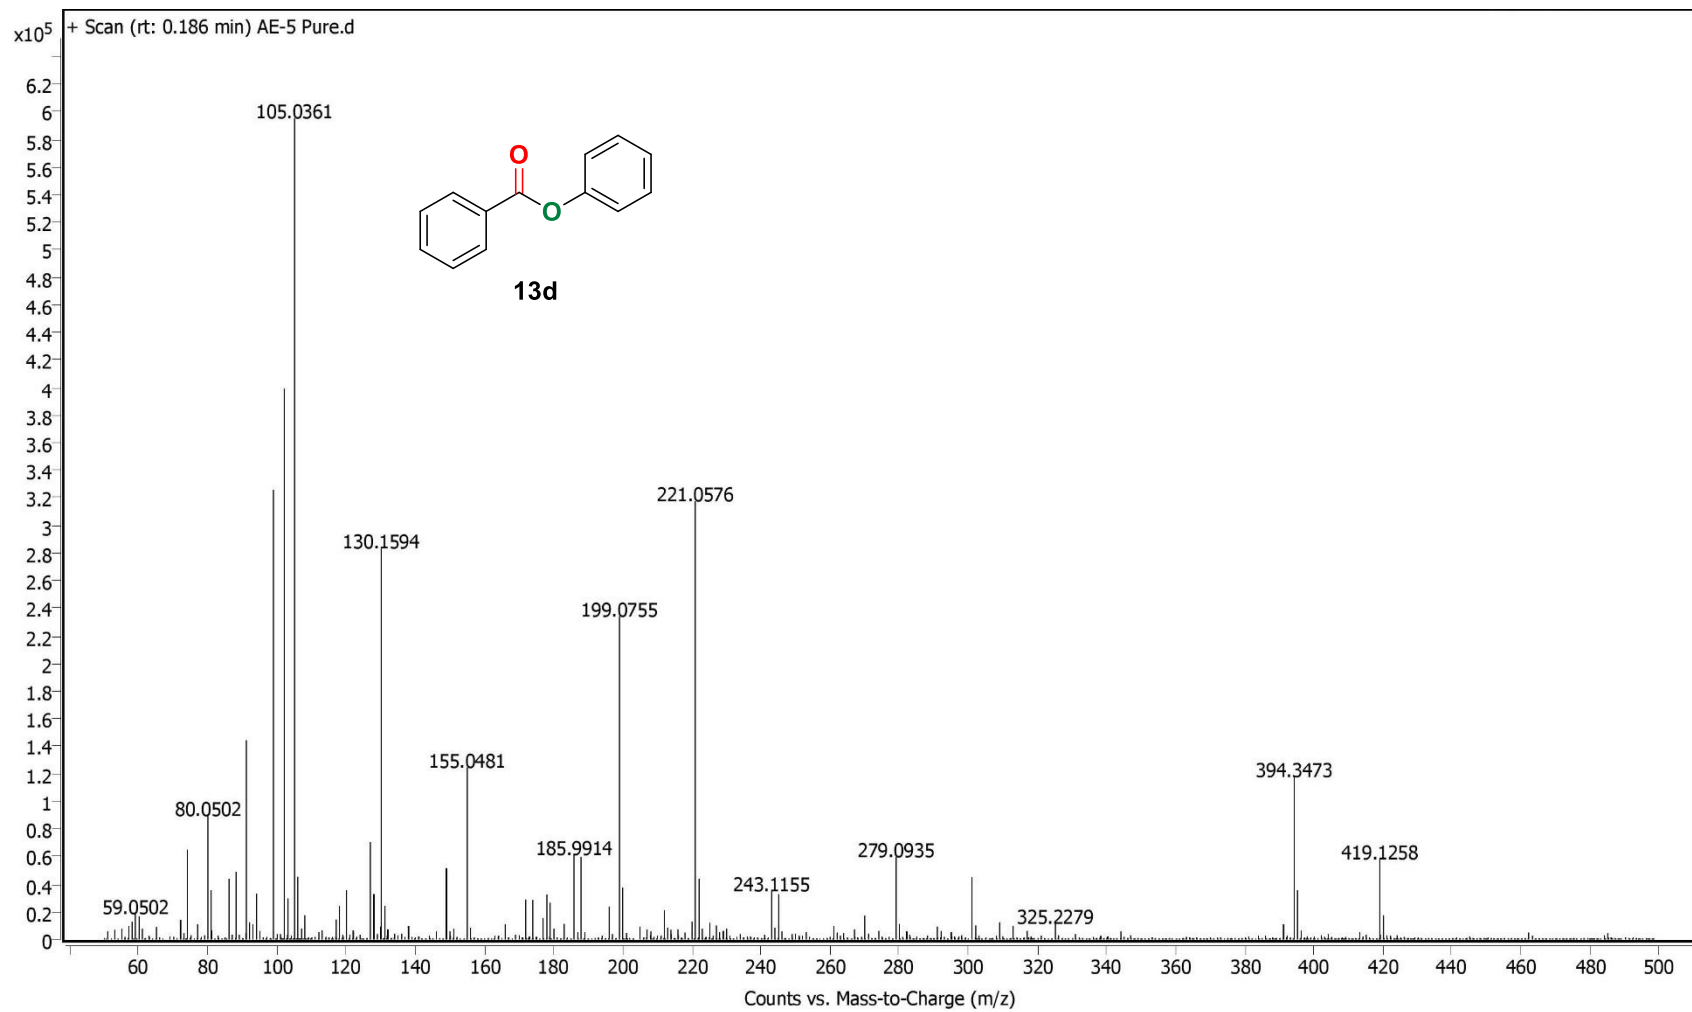

**Figure S163.** HRMS Spectrum of **13d**

AE-11 1H NMR

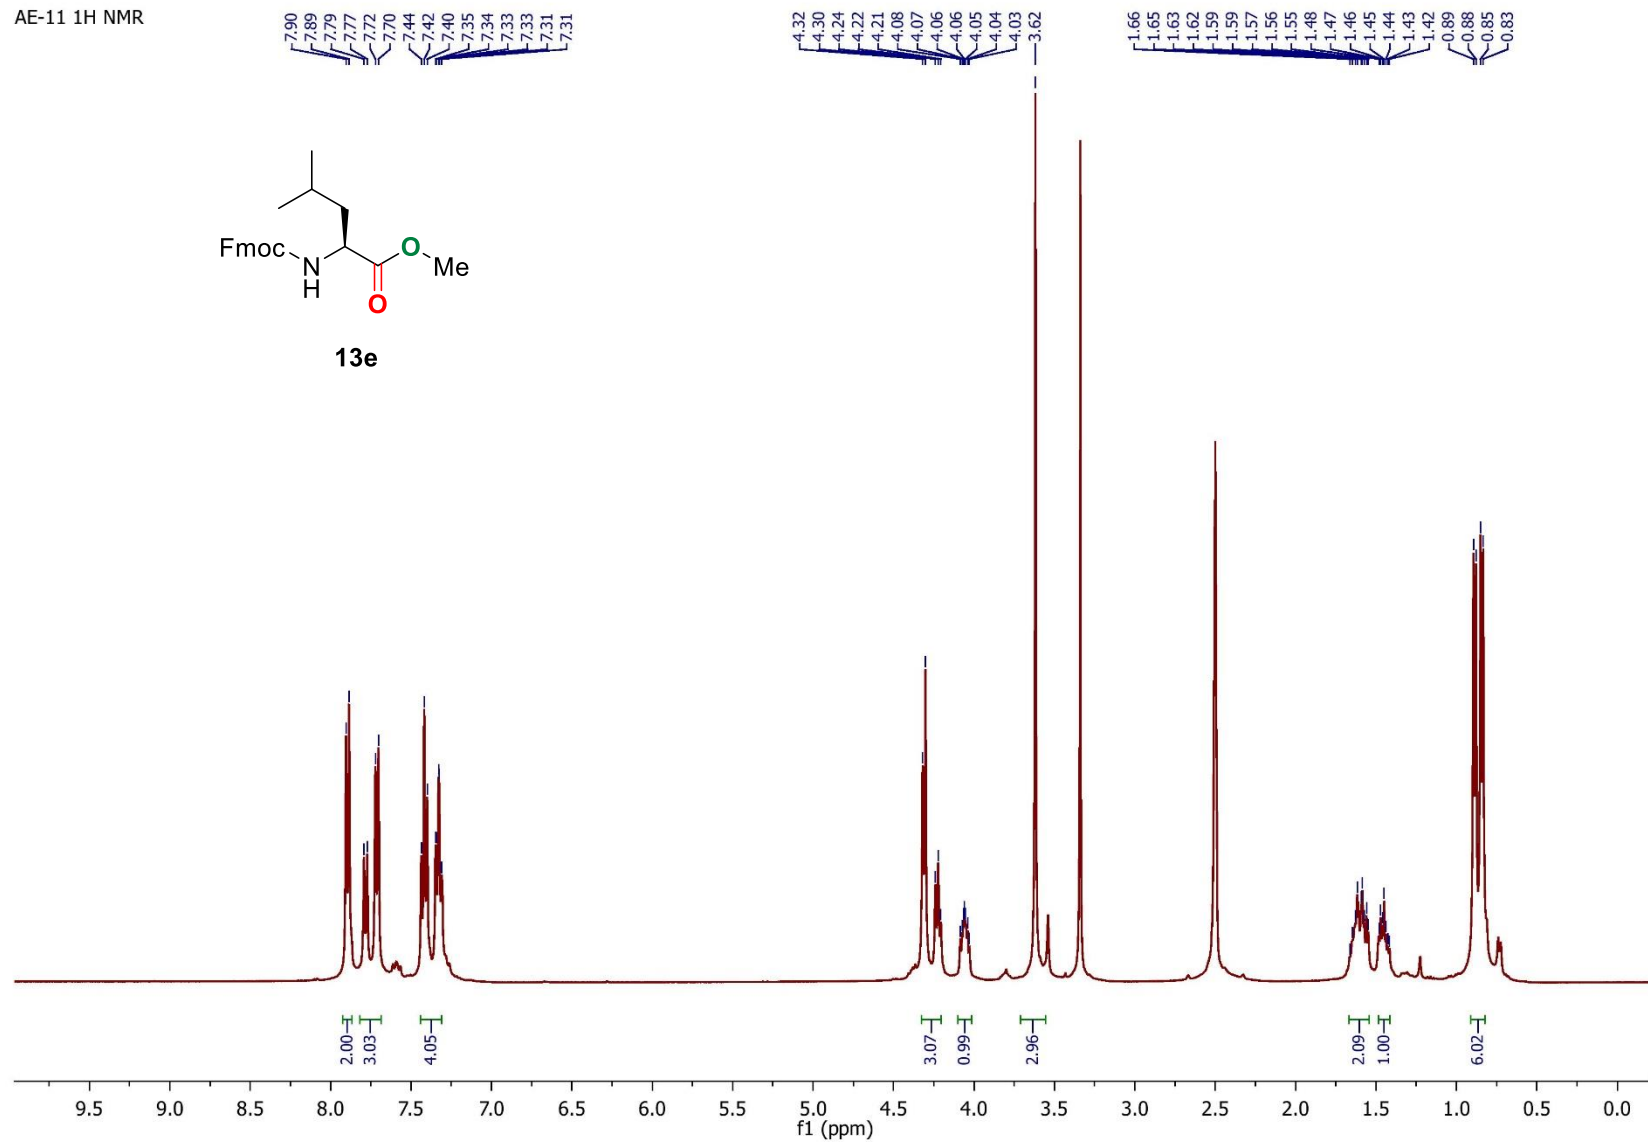

Figure S164. <sup>1</sup>H NMR Spectrum of 13e (400MHz, DMSO-d<sub>6</sub>)

AE-11 <sup>13</sup>C NMR

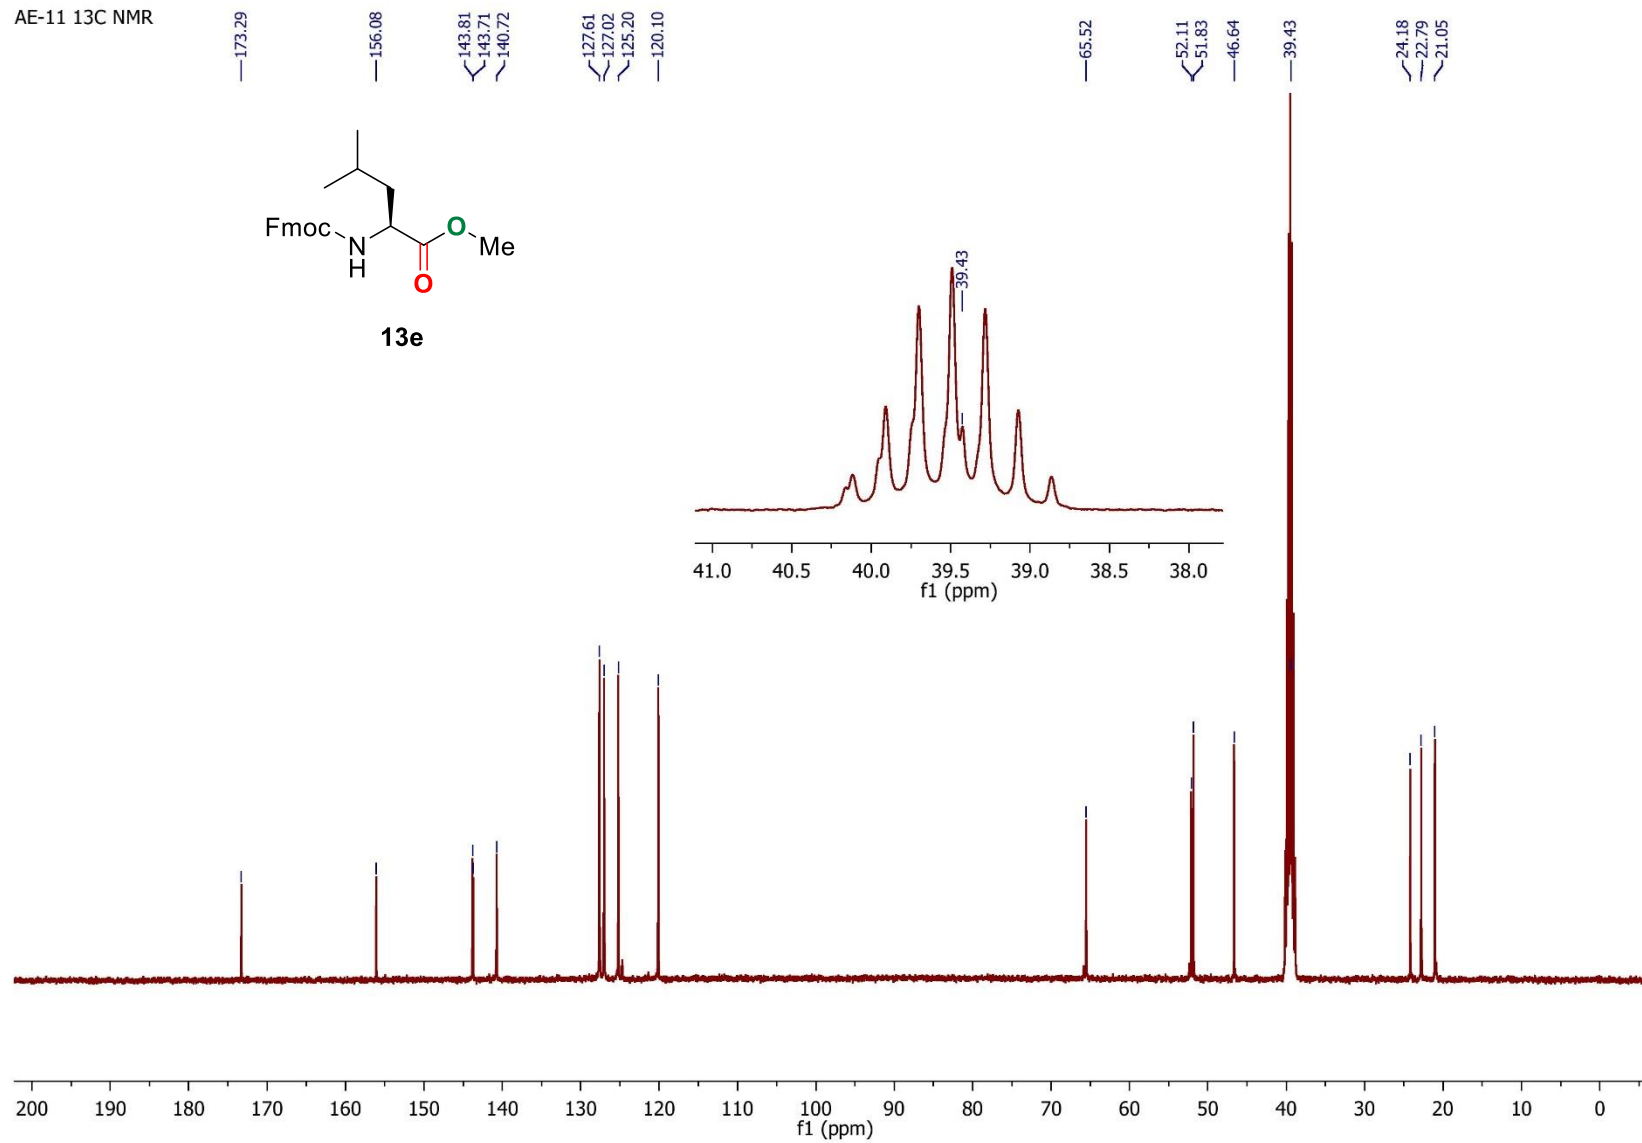

Figure S165. <sup>13</sup>C NMR Spectrum of **13e**(101MHz, DMSO-d<sub>6</sub>)

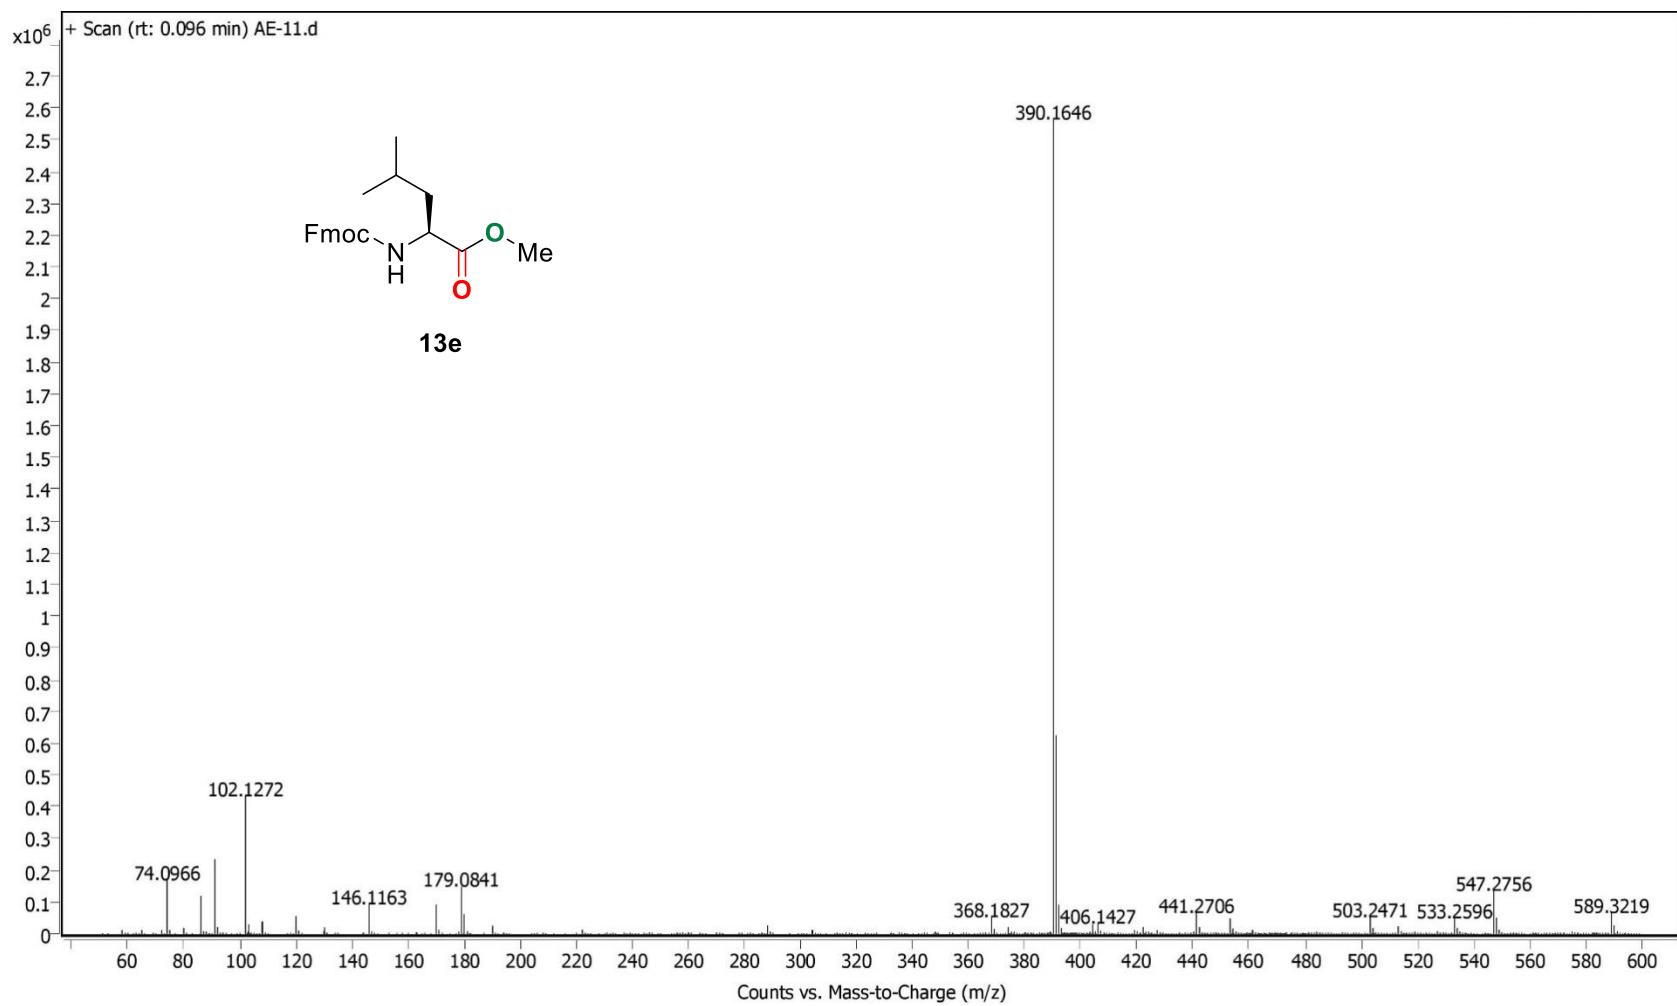

**Figure S166.** HRMS Spectrum of **13e**

AC-6 1H NMR

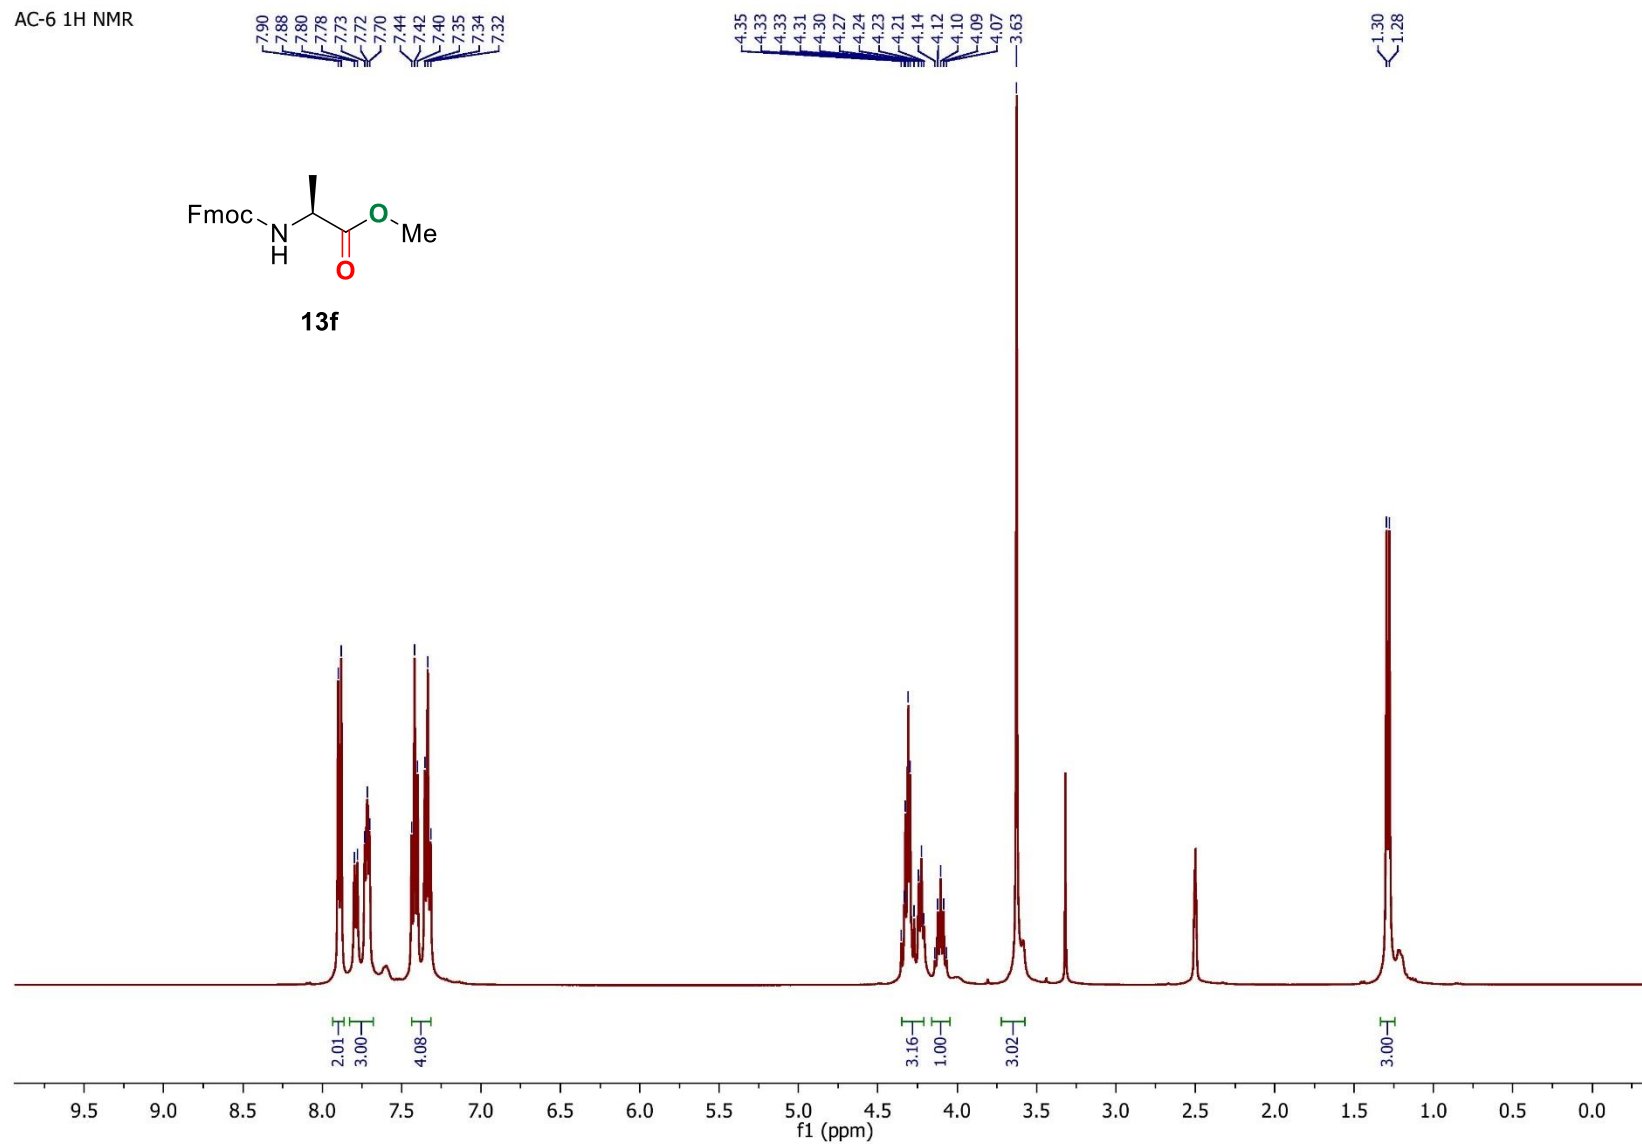

Figure S167. <sup>1</sup>H NMR Spectrum of **13f** (400MHz, DMSO-d<sub>6</sub>)

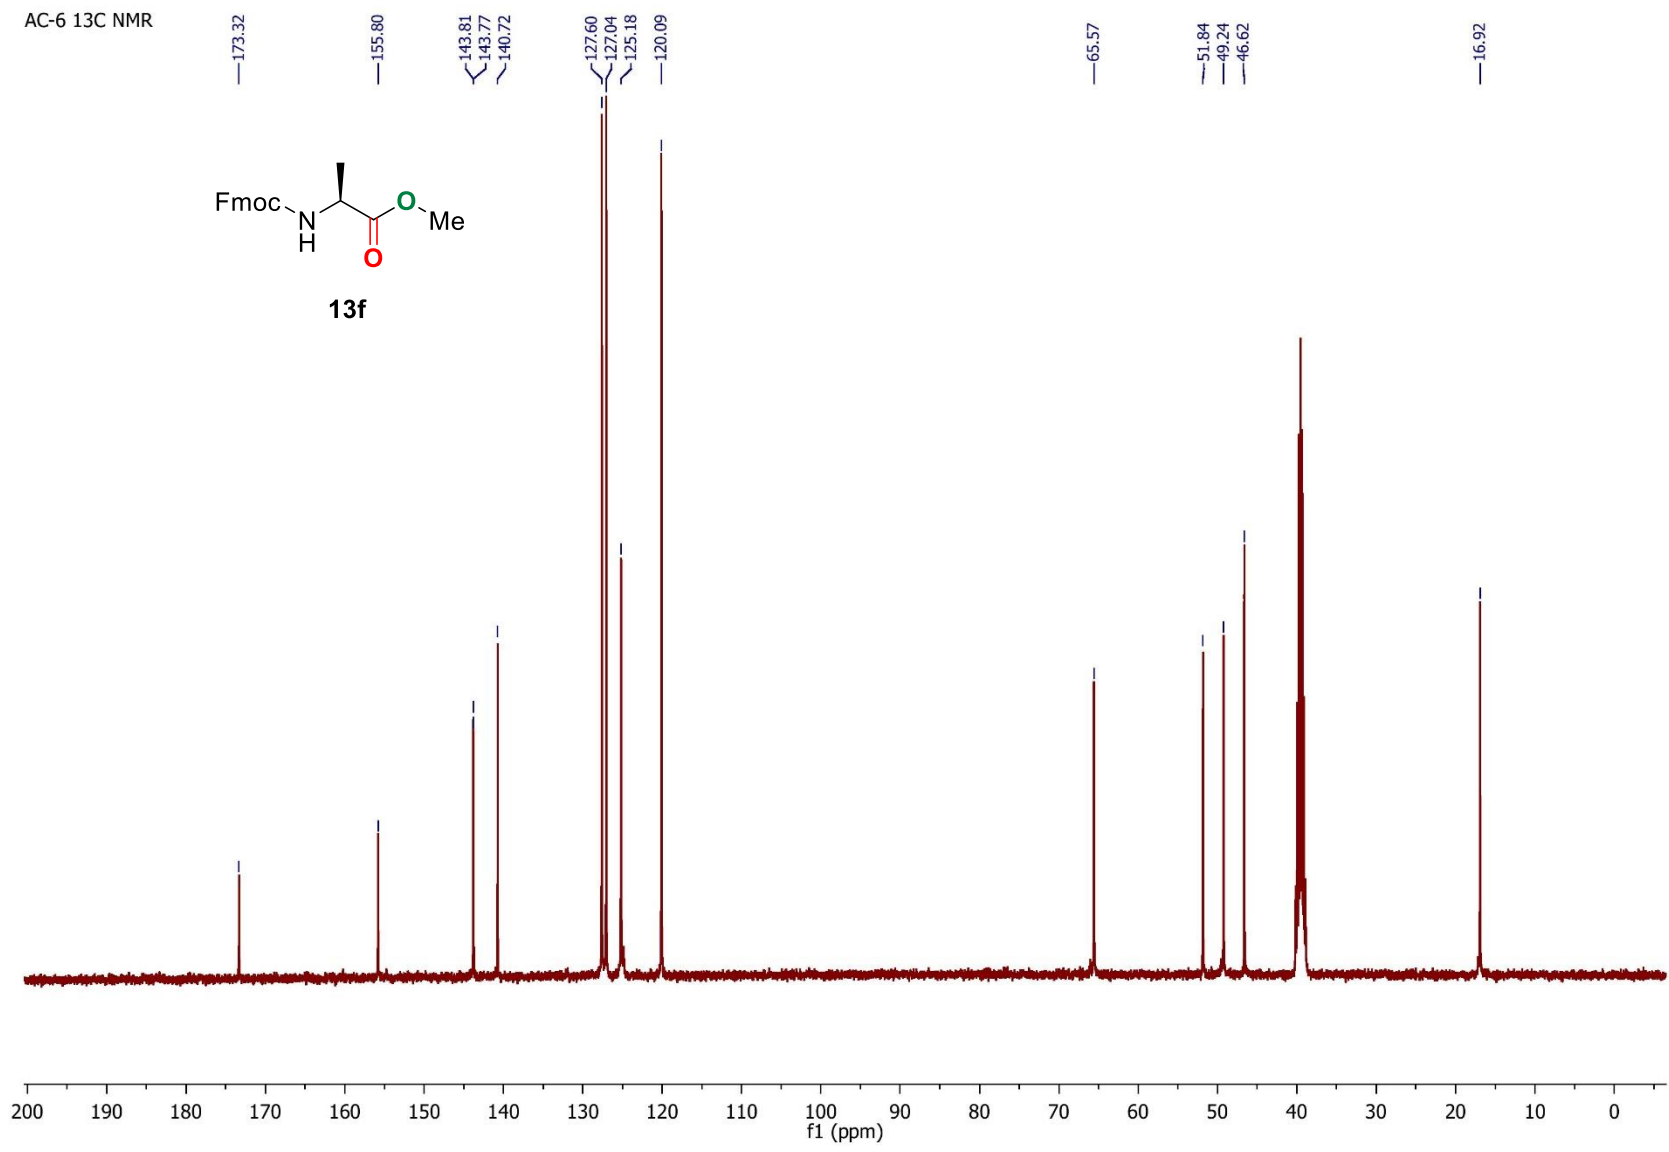

**Figure S168.** <sup>13</sup>C NMR Spectrum of **13f**(101MHz, DMSO-d<sub>6</sub>)

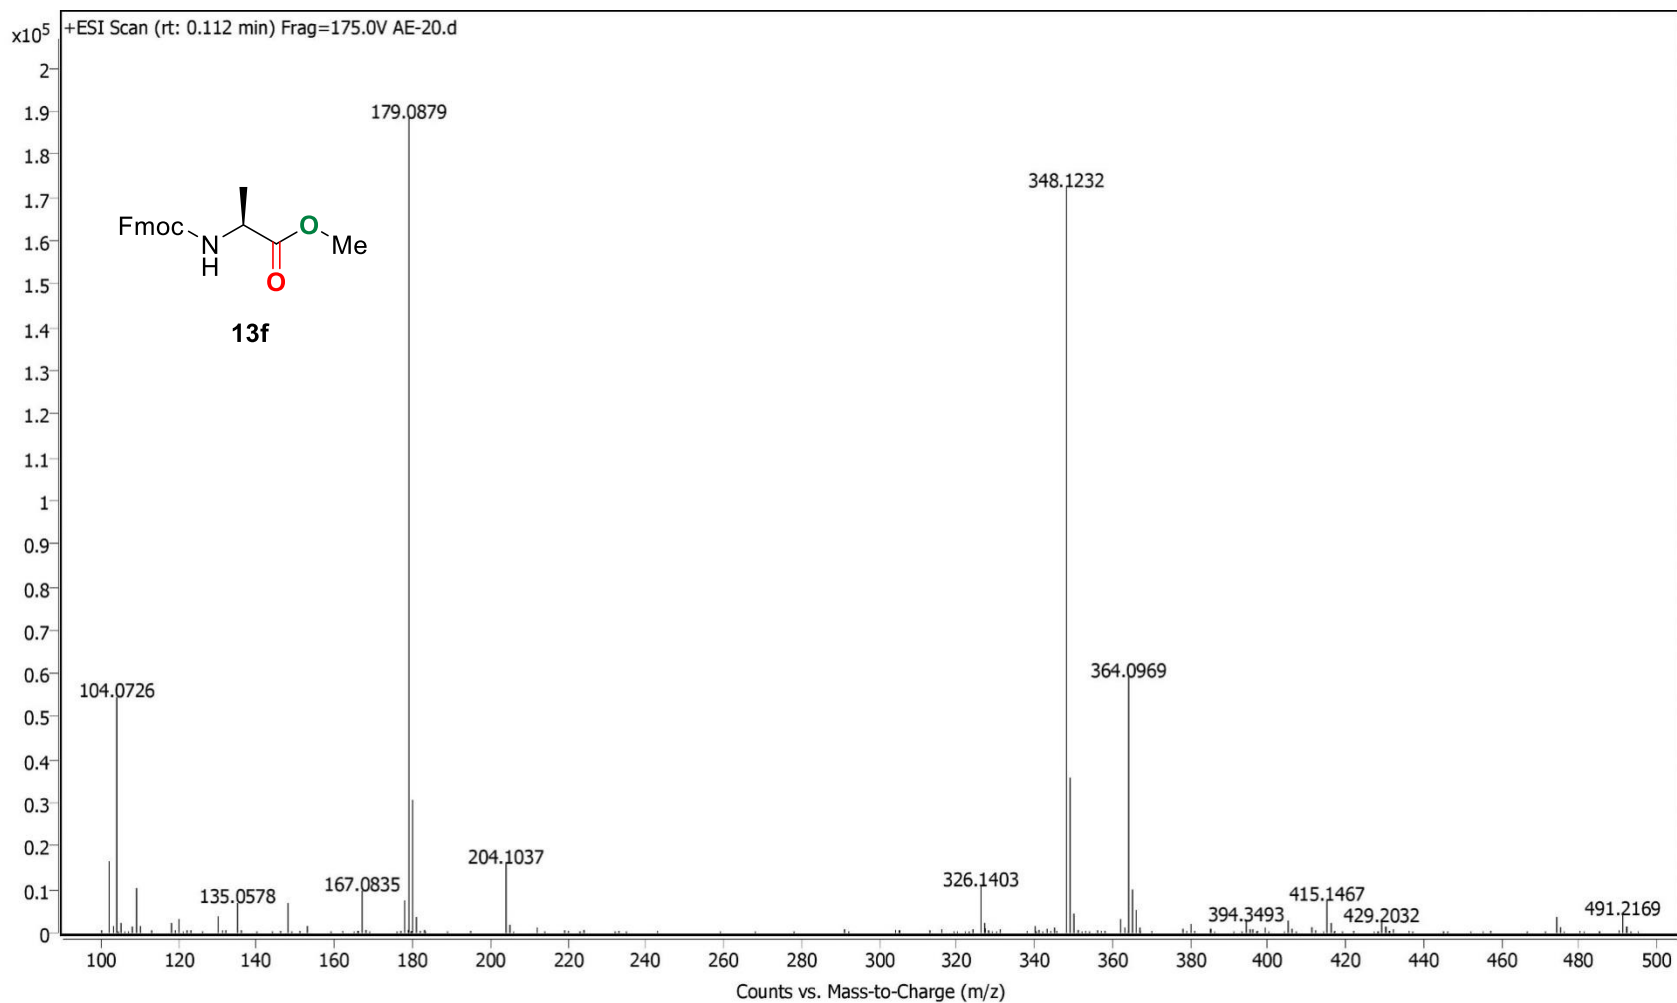

**Figure S169** HRMS Spectrum of **13f**



AE-14 1H NMR

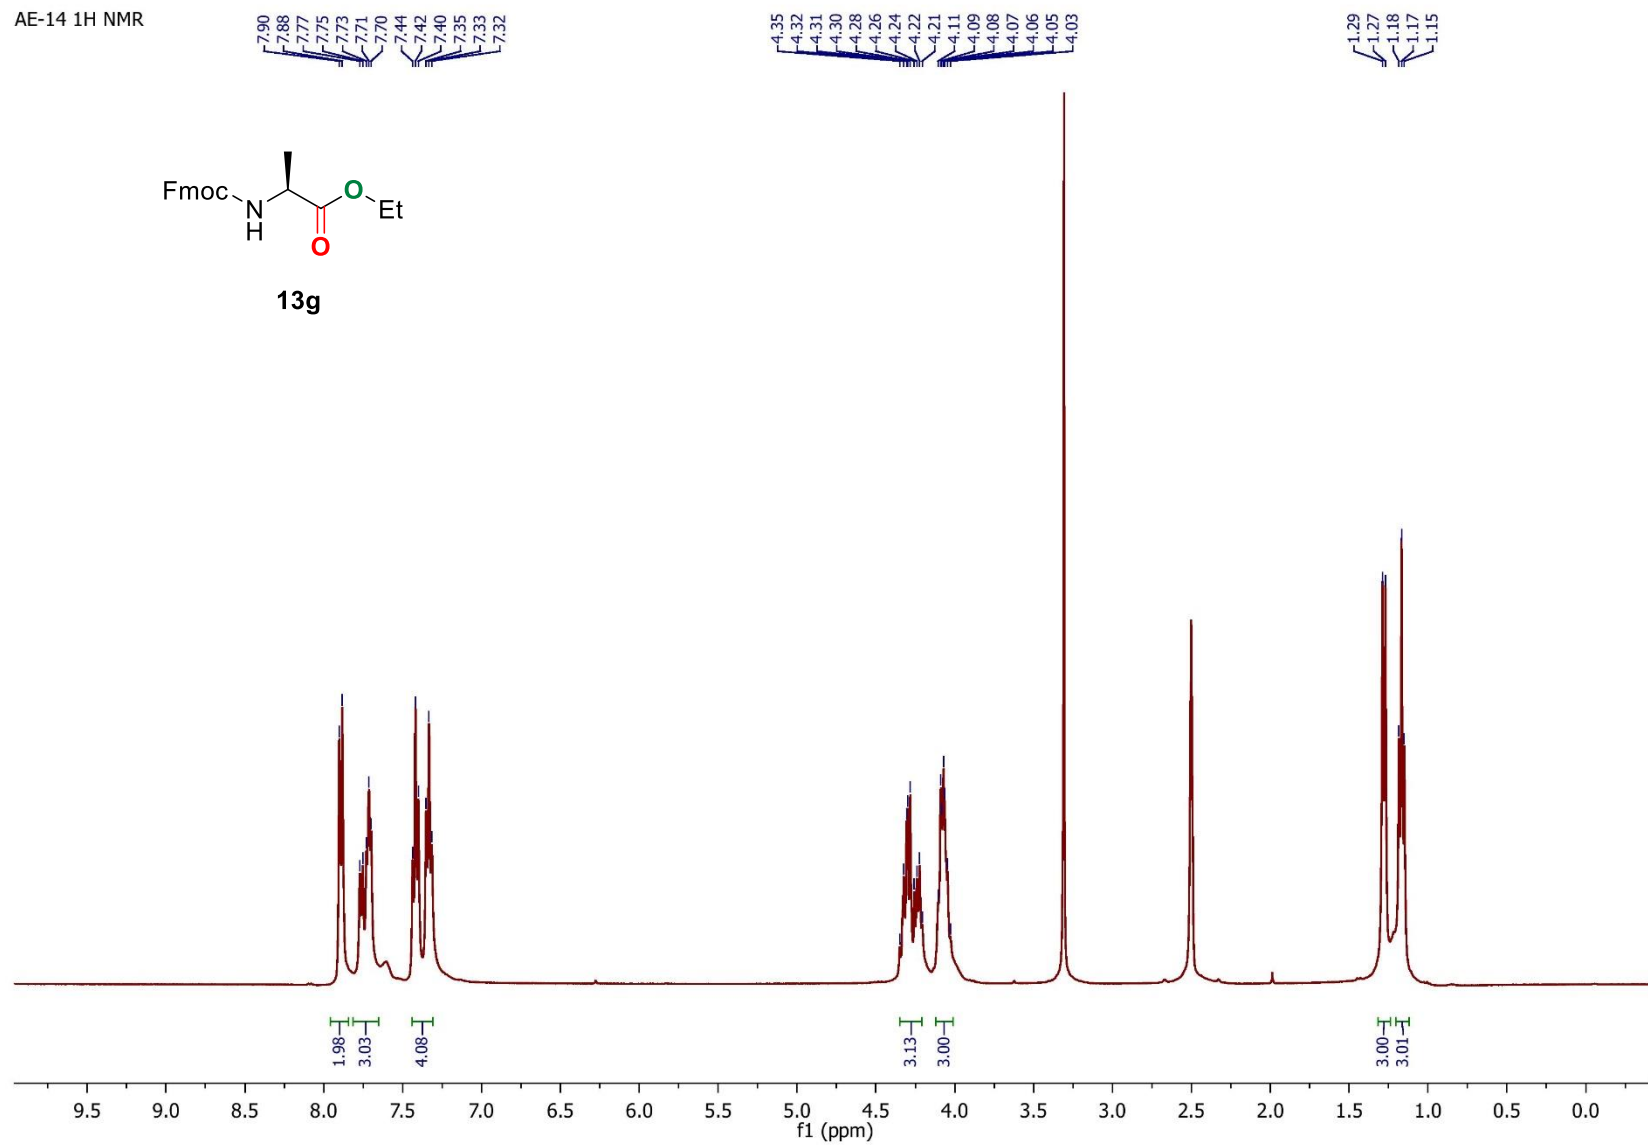

Figure S170. <sup>1</sup>H NMR Spectrum of **13g** (400MHz, DMSO-d<sub>6</sub>)

AE-14 <sup>13</sup>C NMR

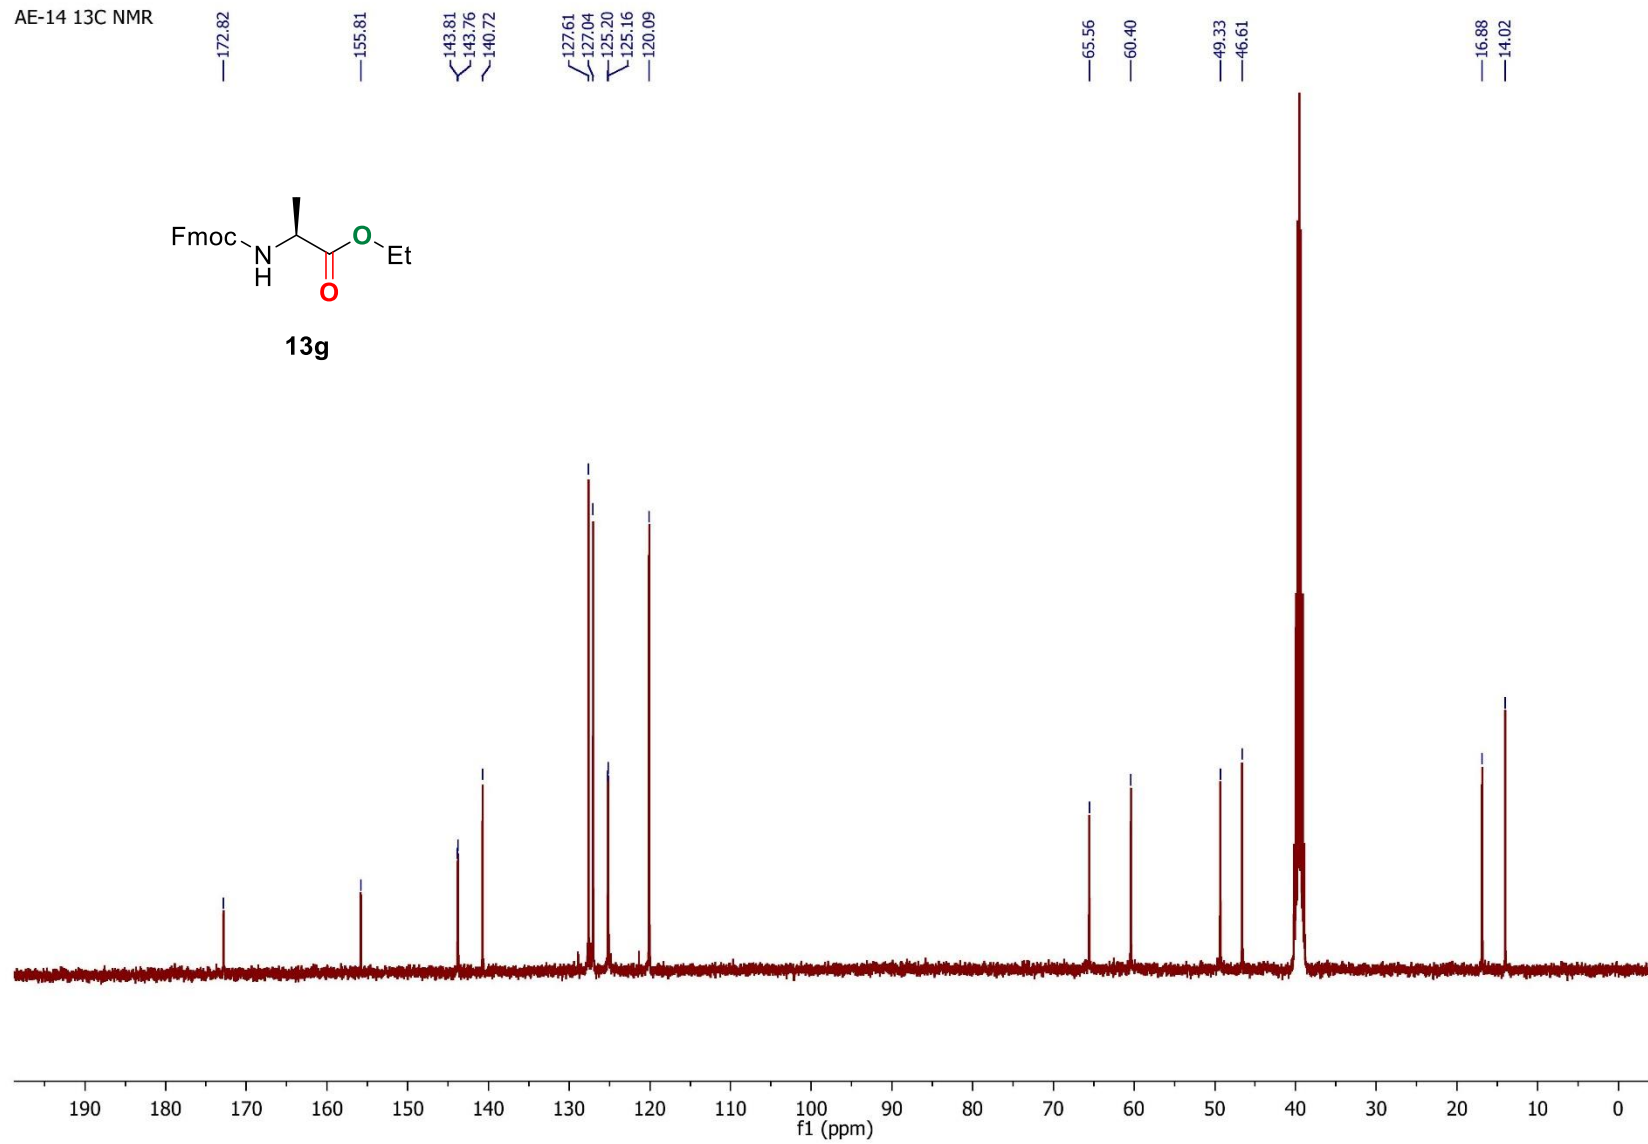

**Figure S171.** <sup>13</sup>C NMR Spectrum of **13g** (101MHz, DMSO-d<sub>6</sub>)

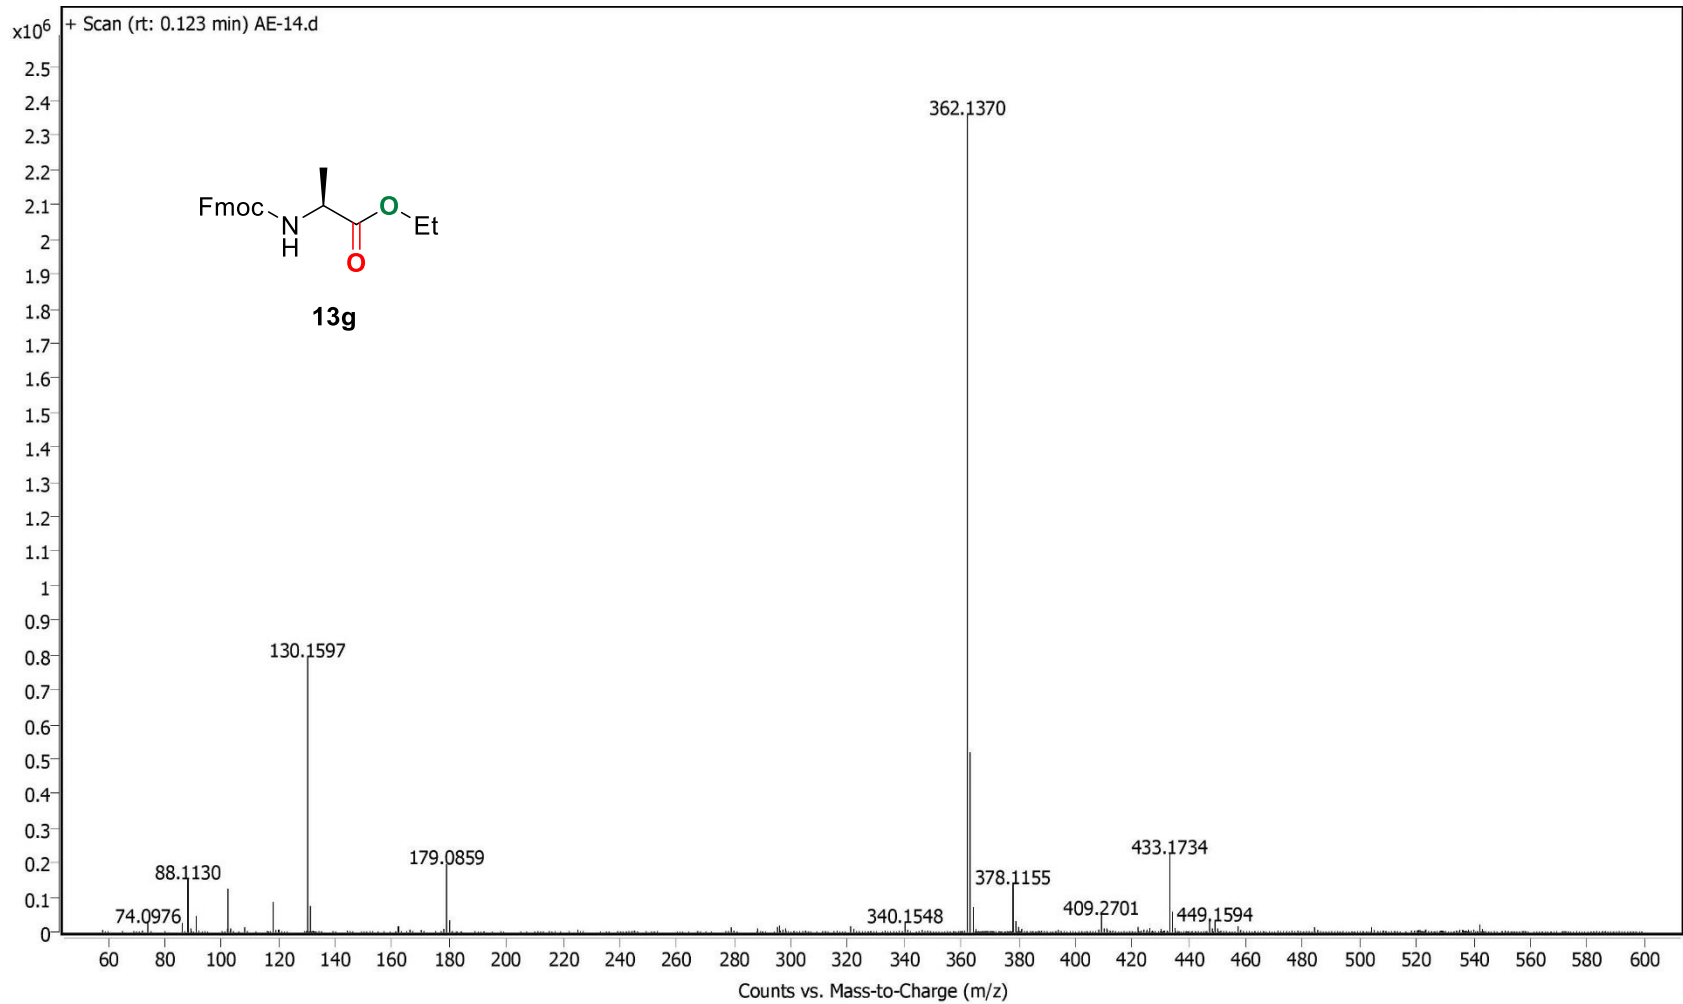

**Figure S172.** HRMS Spectrum of **13g**

AE-13 1H NMR

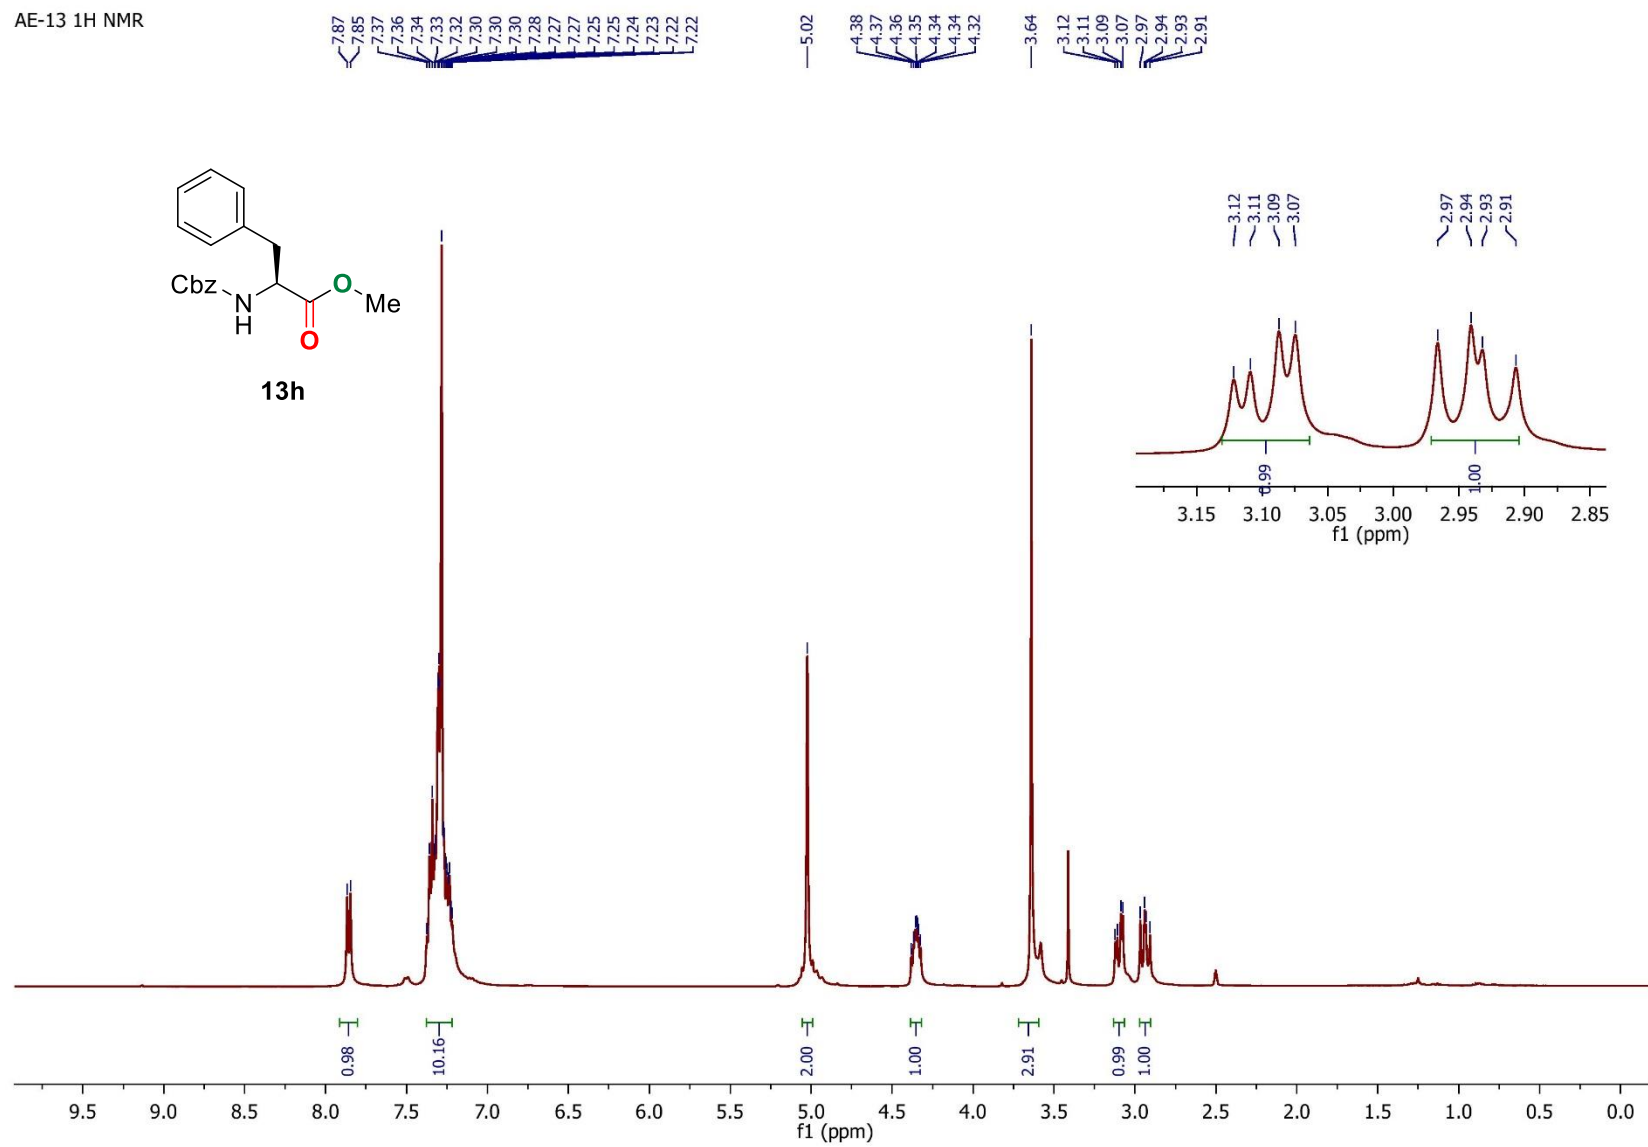

Figure S173. <sup>1</sup>H NMR Spectrum of 13h (400MHz, DMSO-d<sub>6</sub>)

AE-13 13C NMR

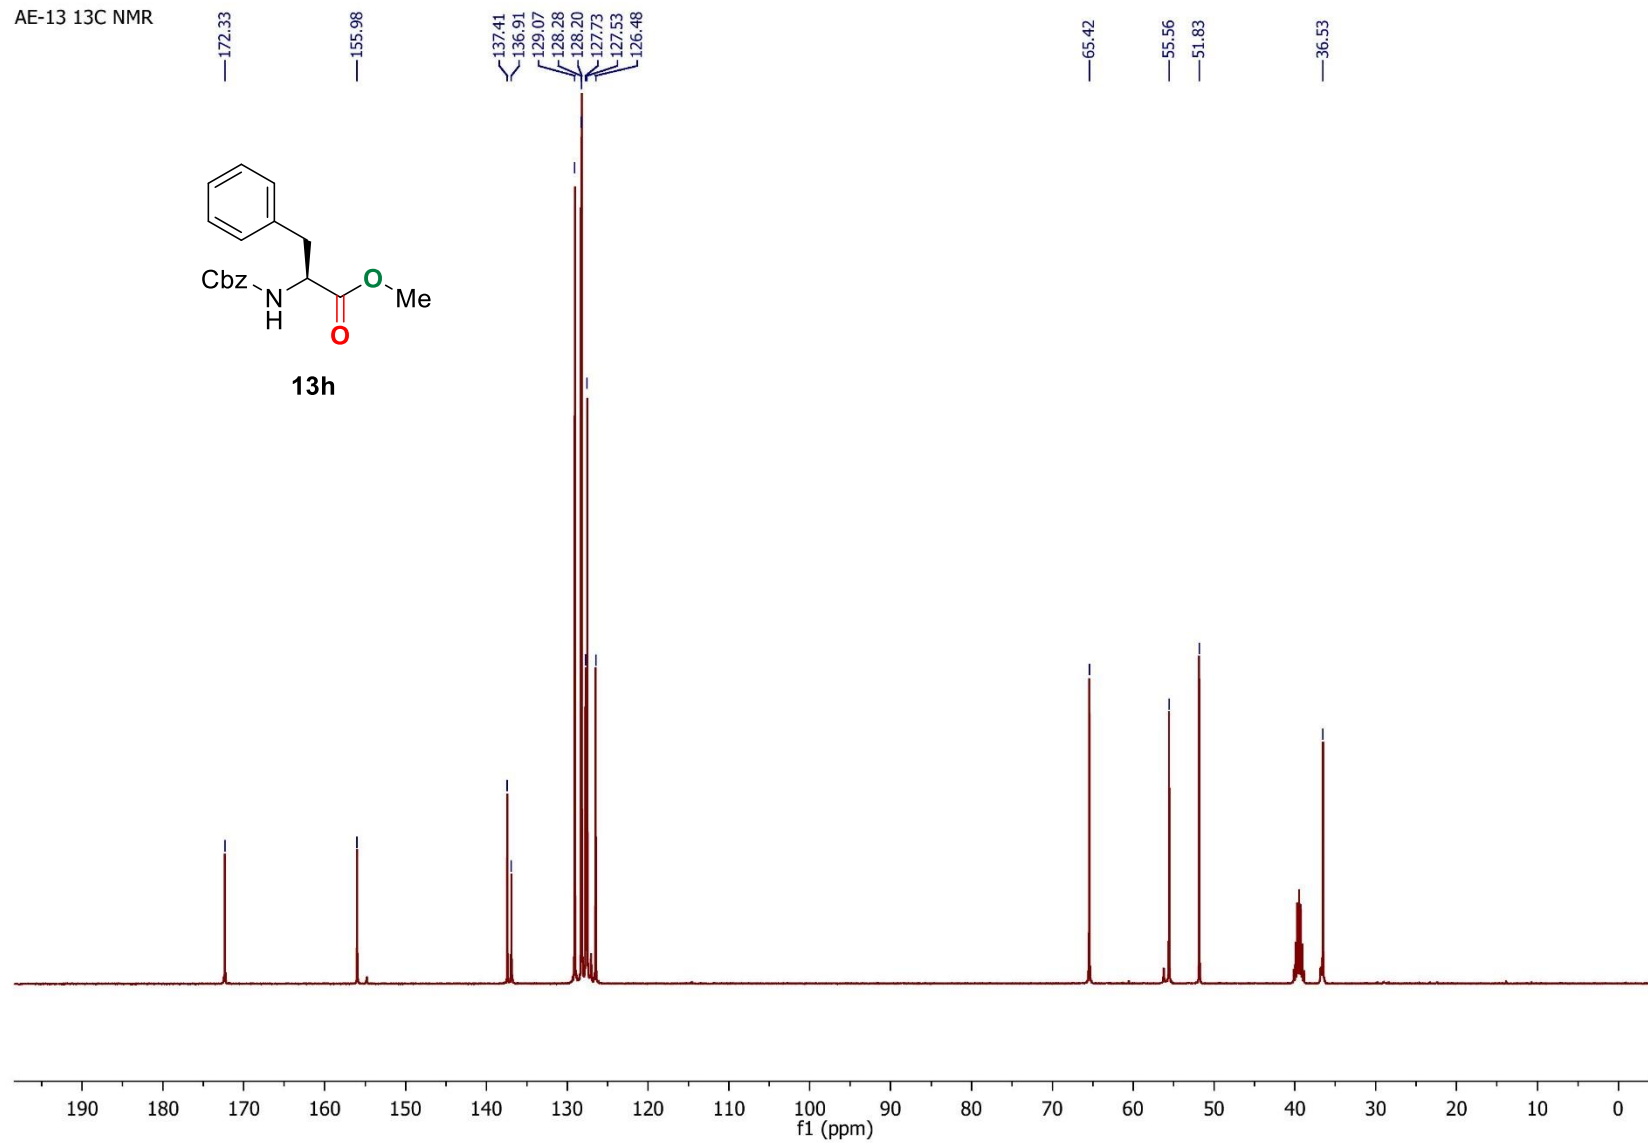

Figure S174. <sup>13</sup>C NMR Spectrum of **13h** (101MHz, DMSO-d<sub>6</sub>)

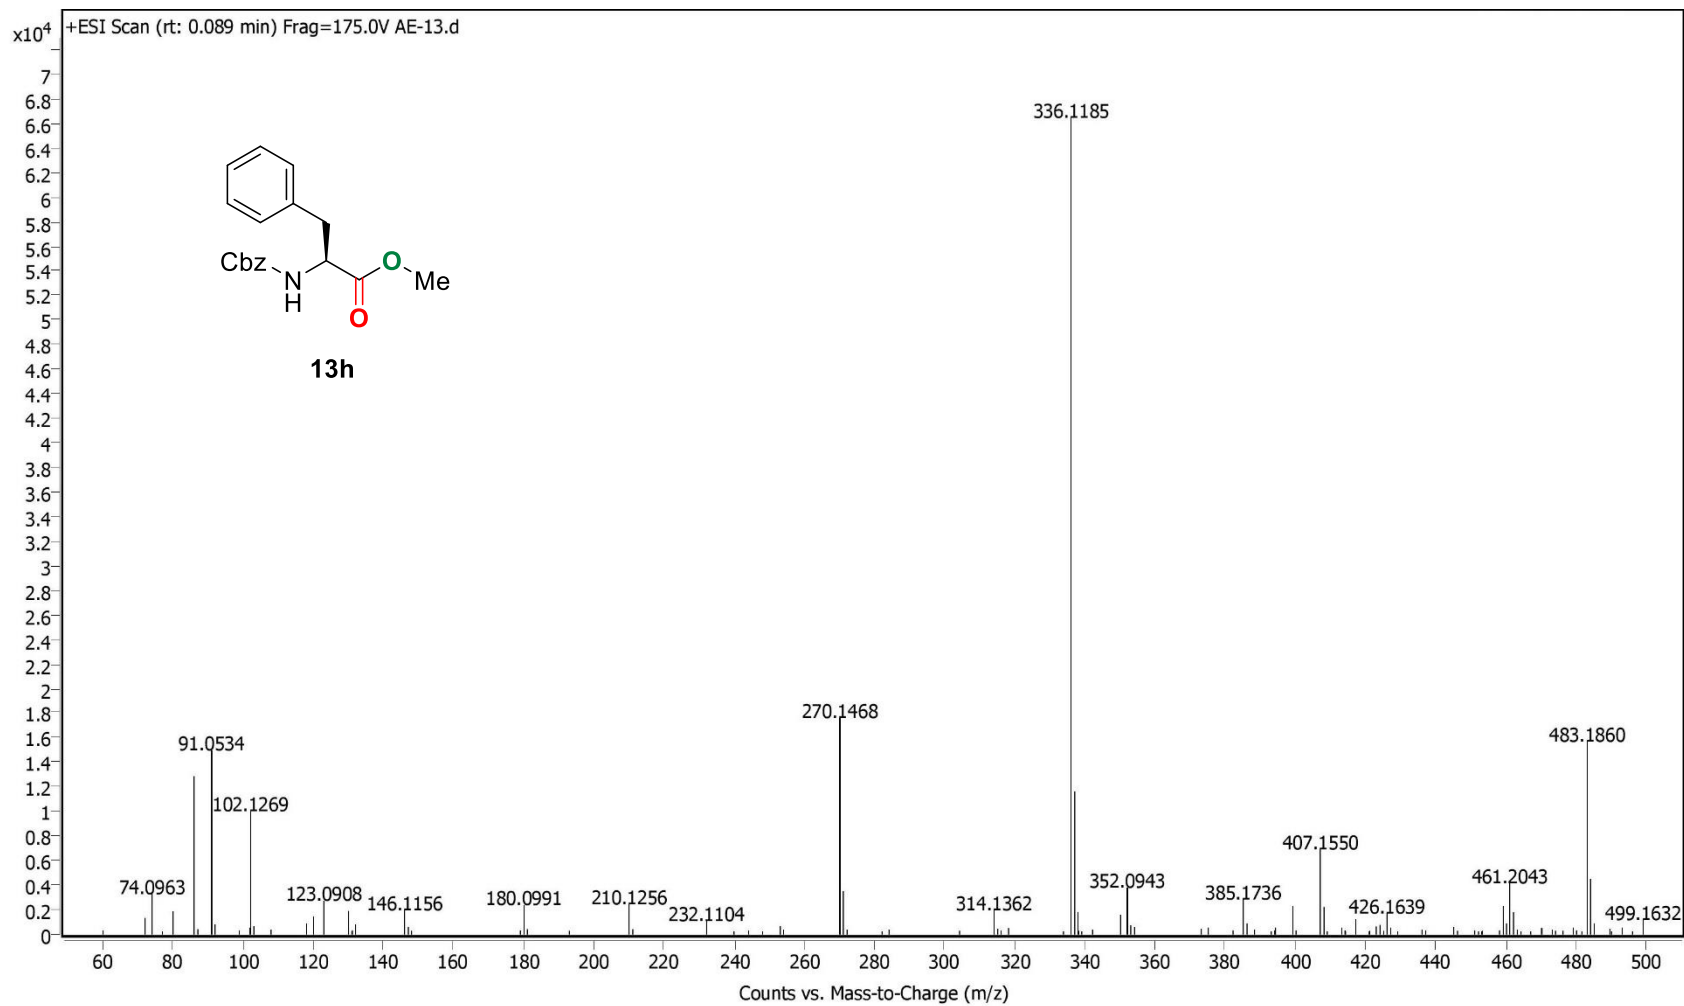

**Figure S175** HRMS Spectrum of **13h**

AE-10 1H NMR

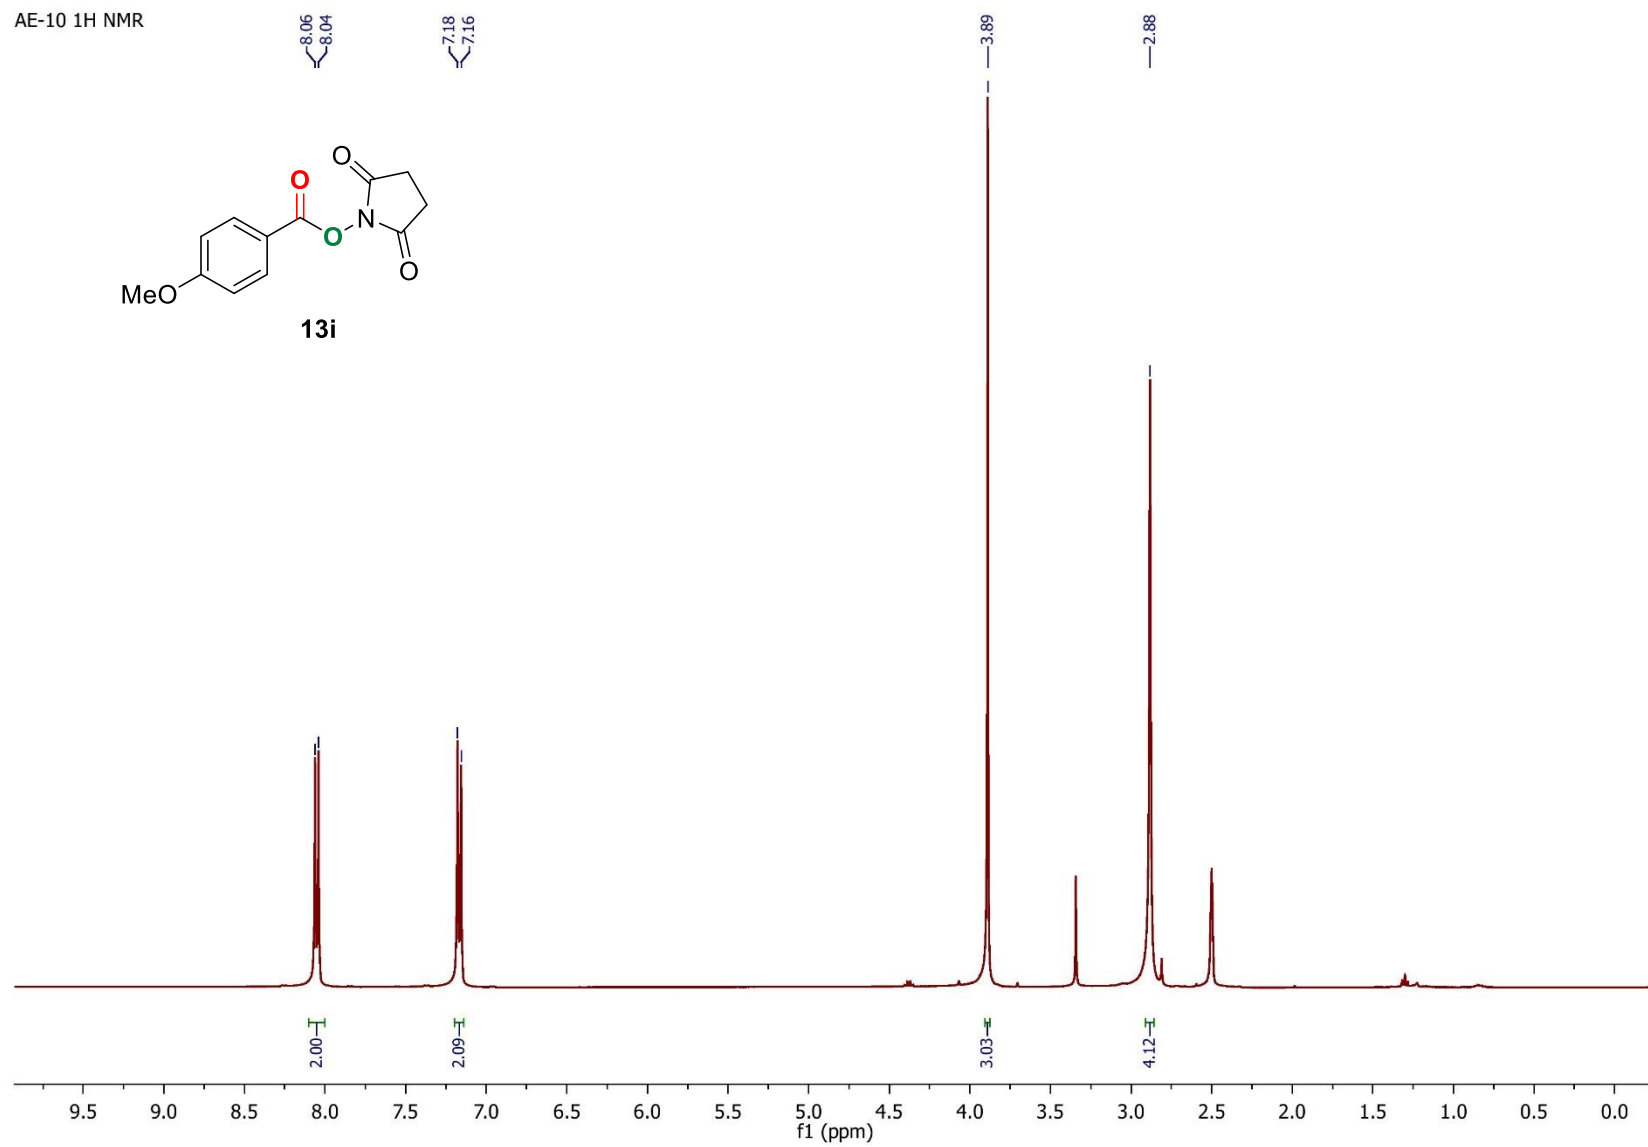

Figure S176. <sup>1</sup>H NMR Spectrum of 13i (400MHz, DMSO-d<sub>6</sub>)

AE-10

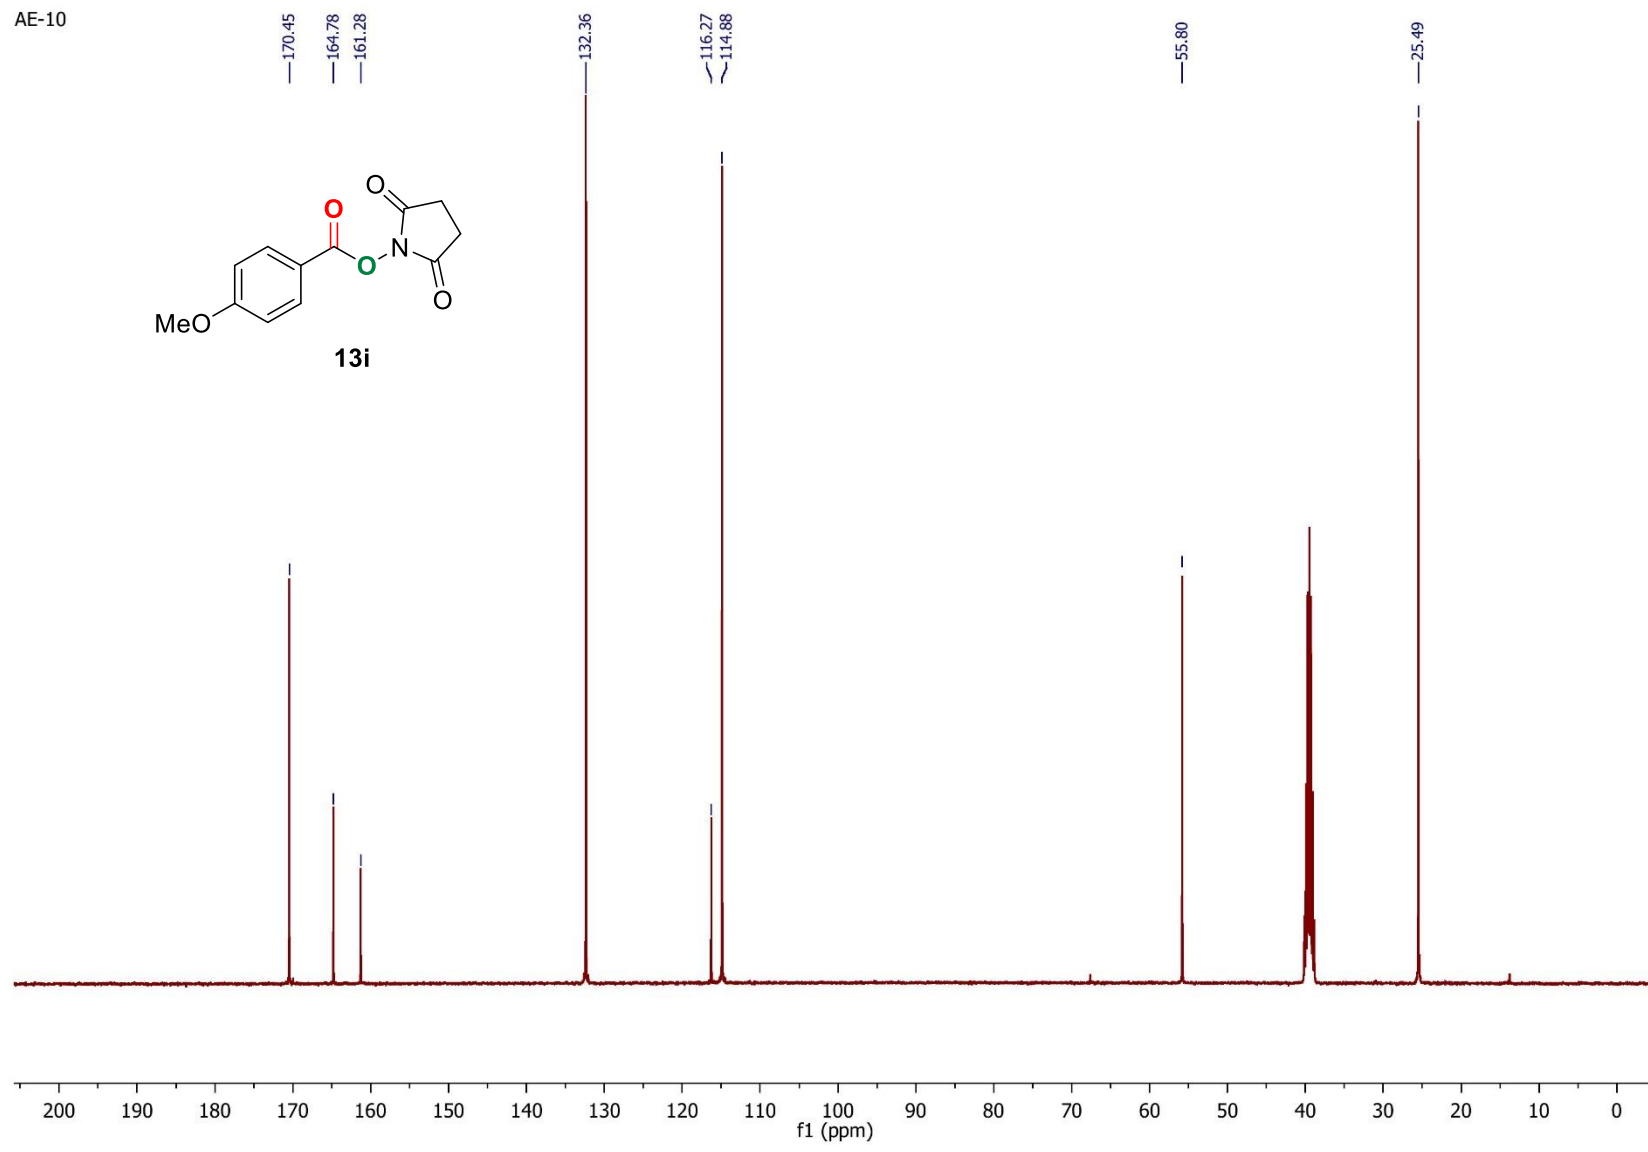

Figure S177. <sup>13</sup>C NMR Spectrum of 13i (101MHz, DMSO-d<sub>6</sub>)



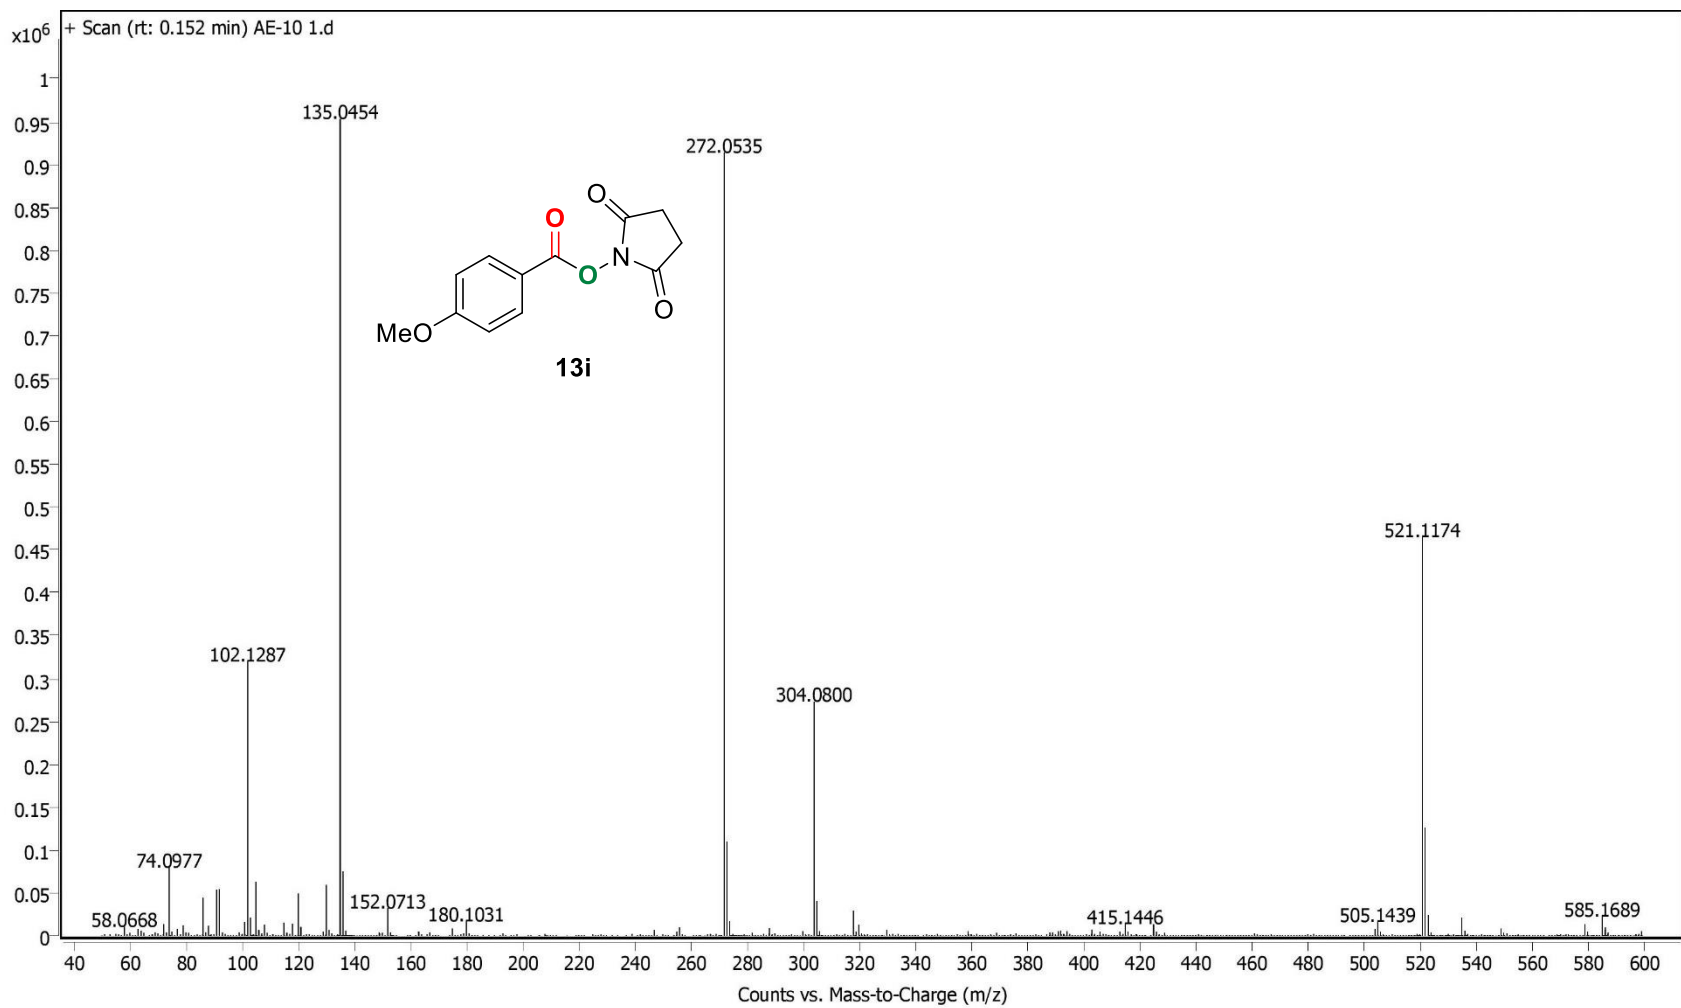

**Figure S178.** HRMS Spectrum of **13i**

## HPLC studies for determining racemization of 3a

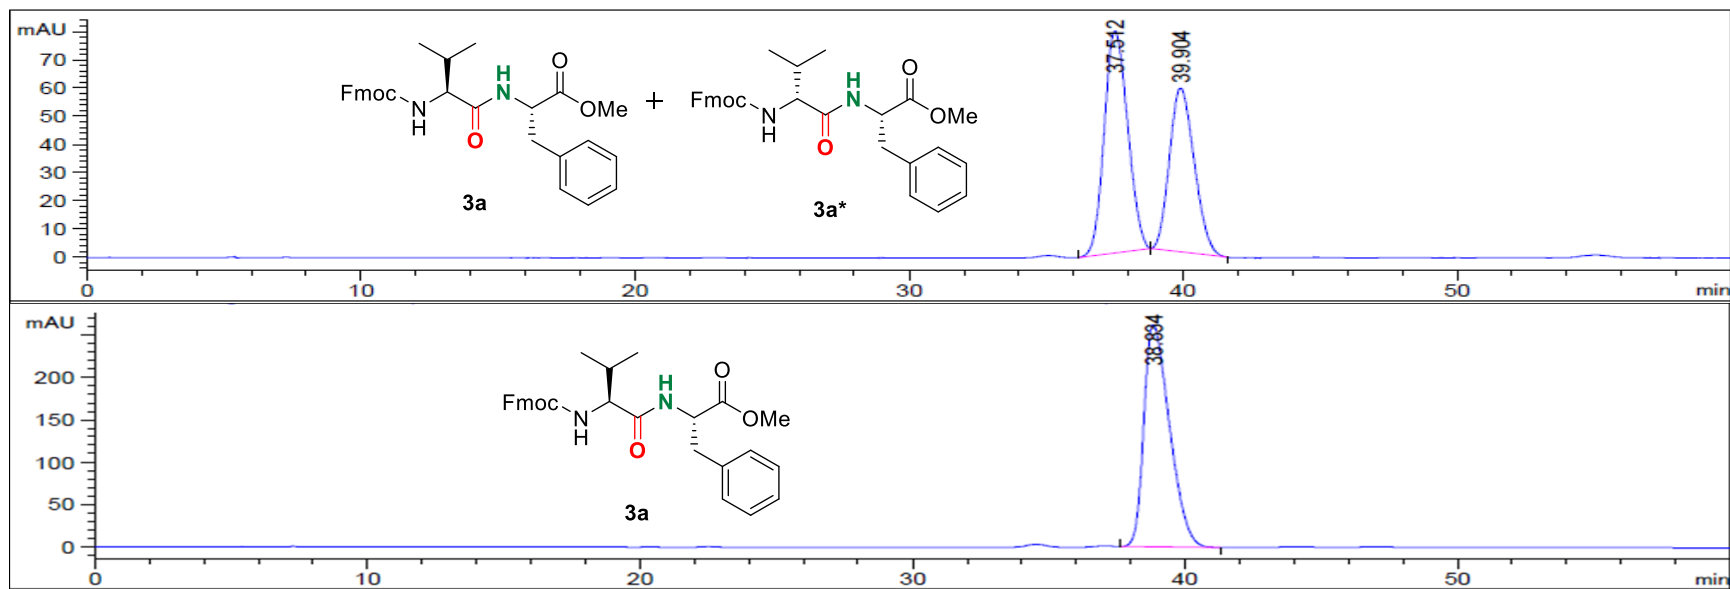

**HPLC condition:** water-acetonitrile (35-65%) in 60 min; VWD at  $\lambda = 254$  nm; flow rate: 0.5 mL/min; column: phenomenex made Lux, pore size-5 $\mu$ , Cellulose-1, diameter x length = 250 x 4.6 mm).

1) Mixed HPLC data of (L,L)-3a and (D,L) 3a\*

| Peak | Ret Time [min] | Area       | Height [mAU] | Area %  |
|------|----------------|------------|--------------|---------|
| 01   | 37.512         | 4681.70166 | 78.72181     | 56.1238 |
| 02   | 39.904         | 3660.03784 | 58.05646     | 43.8762 |

2) Pure HPLC data of (L,L)-3a

| Peak | Ret Time [min] | Area      | Height [mAU] | Area %   |
|------|----------------|-----------|--------------|----------|
| 01   | 38.834         | 1.71320e4 | 262.20193    | 100.0000 |

**HPLC studies for determining racemization of 3b**

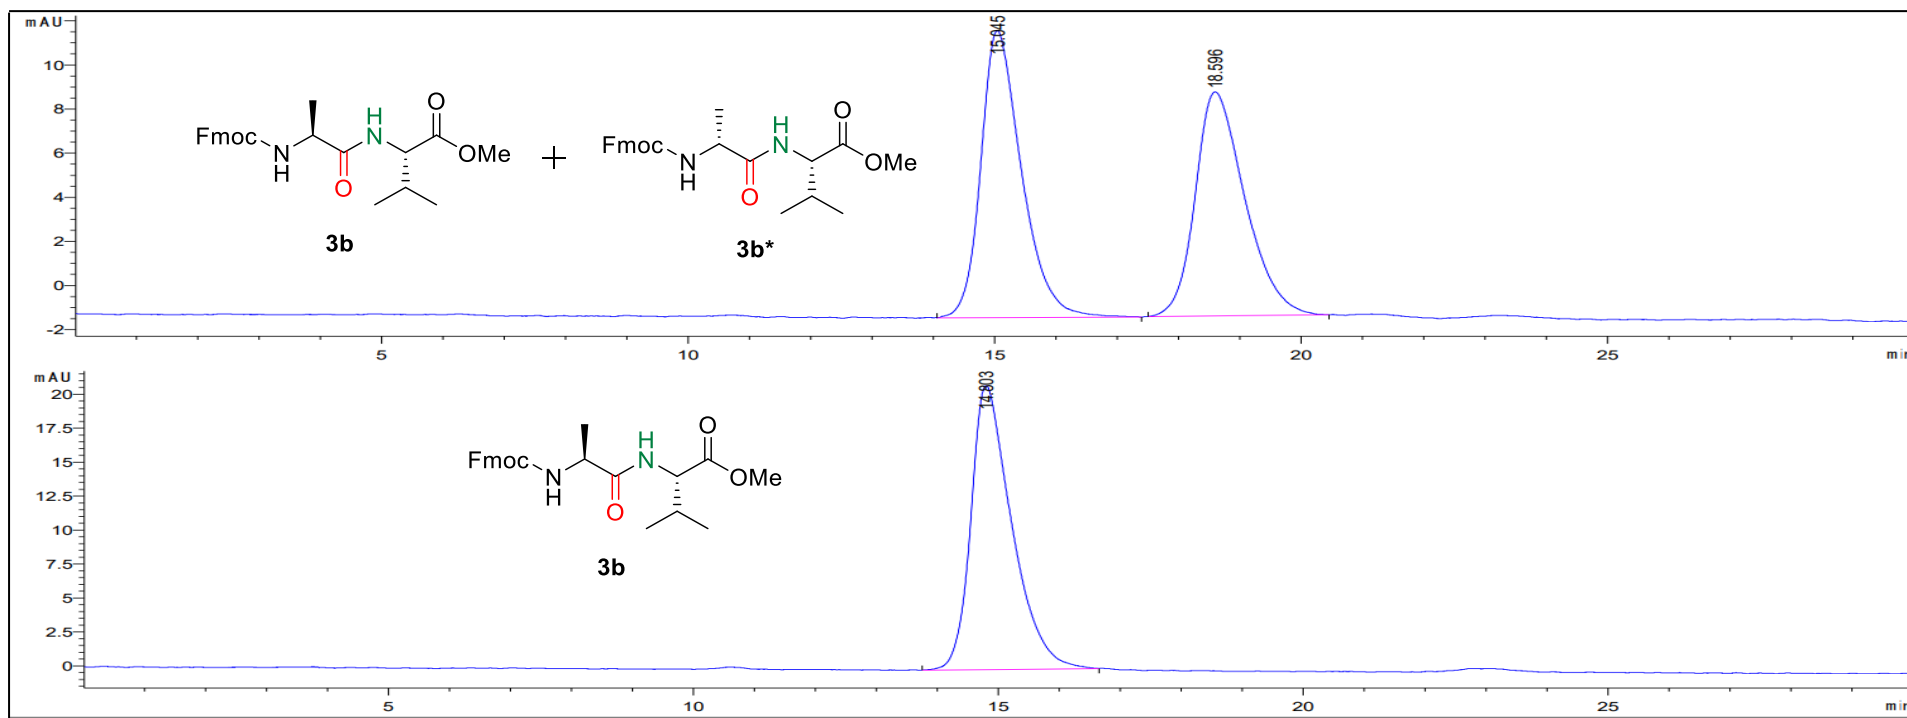

**HPLC condition:** water-acetonitrile (30-70%) in 30 min; VWD at  $\lambda = 254$  nm; flow rate: 0.5 mL/min; column: phenomenex made Lux, pore size-5 $\mu$ , Cellulose-1, diameter x length = 250 x 4.6 mm).

1) Mixed HPLC data of (L,L)-3b and (D,L) 3b\*

| Peak | Ret Time [min] | Area      | Height [mAU] | Area %  |
|------|----------------|-----------|--------------|---------|
| 01   | 15.045         | 600.54443 | 13.01576     | 51.2951 |
| 02   | 18.596         | 570.21930 | 10.15413     | 48.7049 |

2) Pure HPLC data of (L,L)-3b

| Peak | Ret Time [min] | Area      | Height [mAU] | Area %   |
|------|----------------|-----------|--------------|----------|
| 01   | 14.803         | 973.65771 | 20.89940     | 100.0000 |

### HPLC studies for determining racemization of 3c

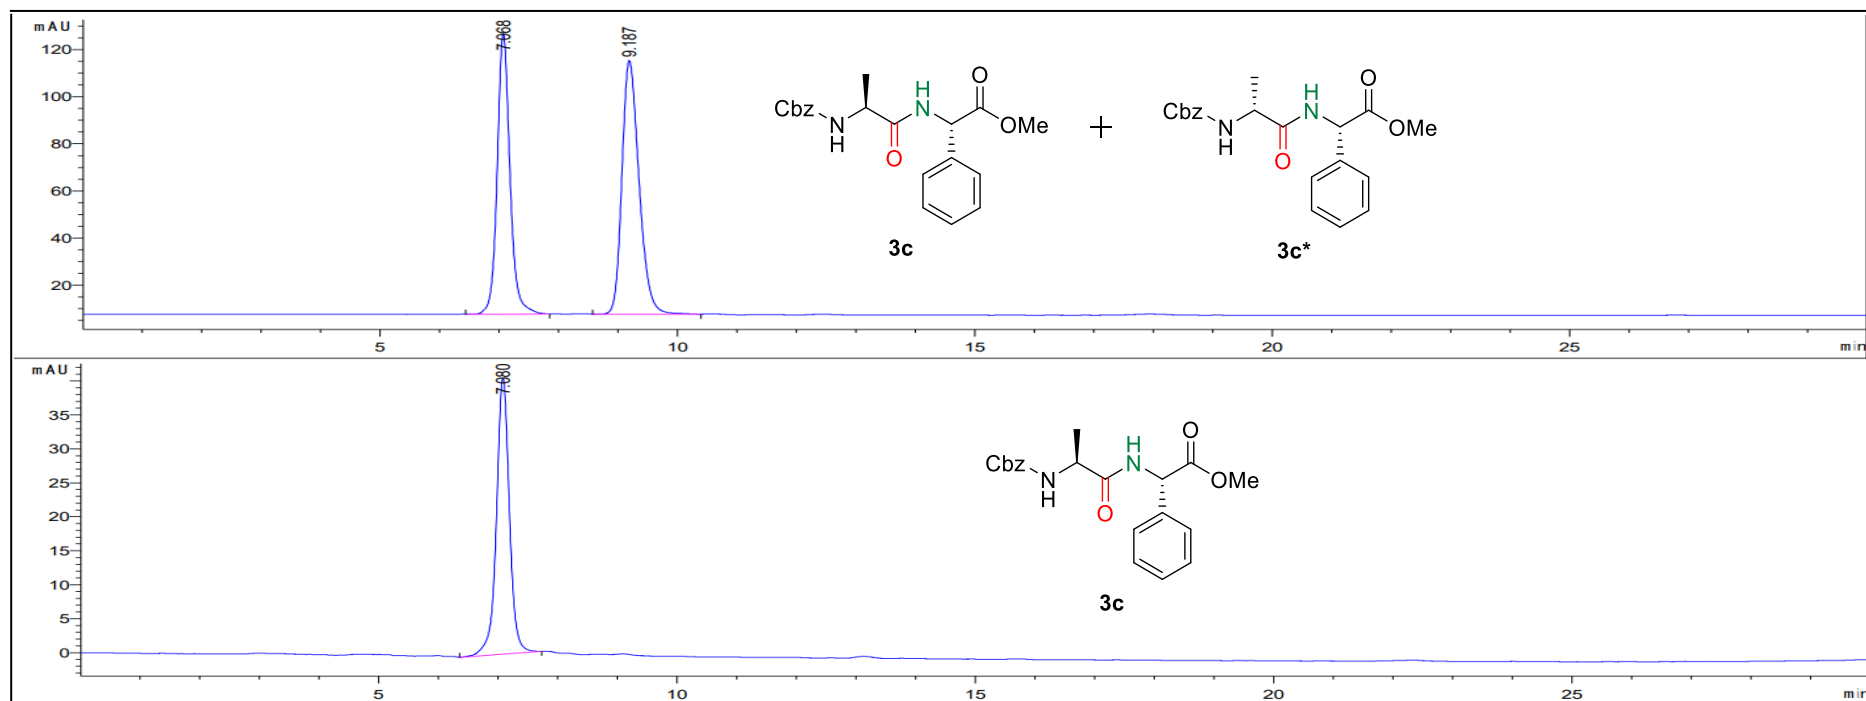

**HPLC condition:** water-acetonitrile (30-70%) in 30 min; VWD at  $\lambda = 254$  nm; flow rate: 1 mL/min; column: phenomenex made Lux, pore size- $5\mu$ , Cellulose-1, diameter x length = 250 x 4.6 mm).

1) Mixed HPLC data of (L,L)-3c and (D,L) 3c\*

| Peak | Ret Time [min] | Area       | Height [mAU] | Area %  |
|------|----------------|------------|--------------|---------|
| 01   | 7.068          | 1779.08960 | 119.15787    | 45.3229 |
| 02   | 9.187          | 2146.27686 | 107.67322    | 54.6771 |

2) Pure HPLC data of (L,L)-3c

| Peak | Ret Time [min] | Area      | Height [mAU] | Area %   |
|------|----------------|-----------|--------------|----------|
| 01   | 7.080          | 613.83362 | 40.67035     | 100.0000 |

HPLC studies for determining racemization of 3e

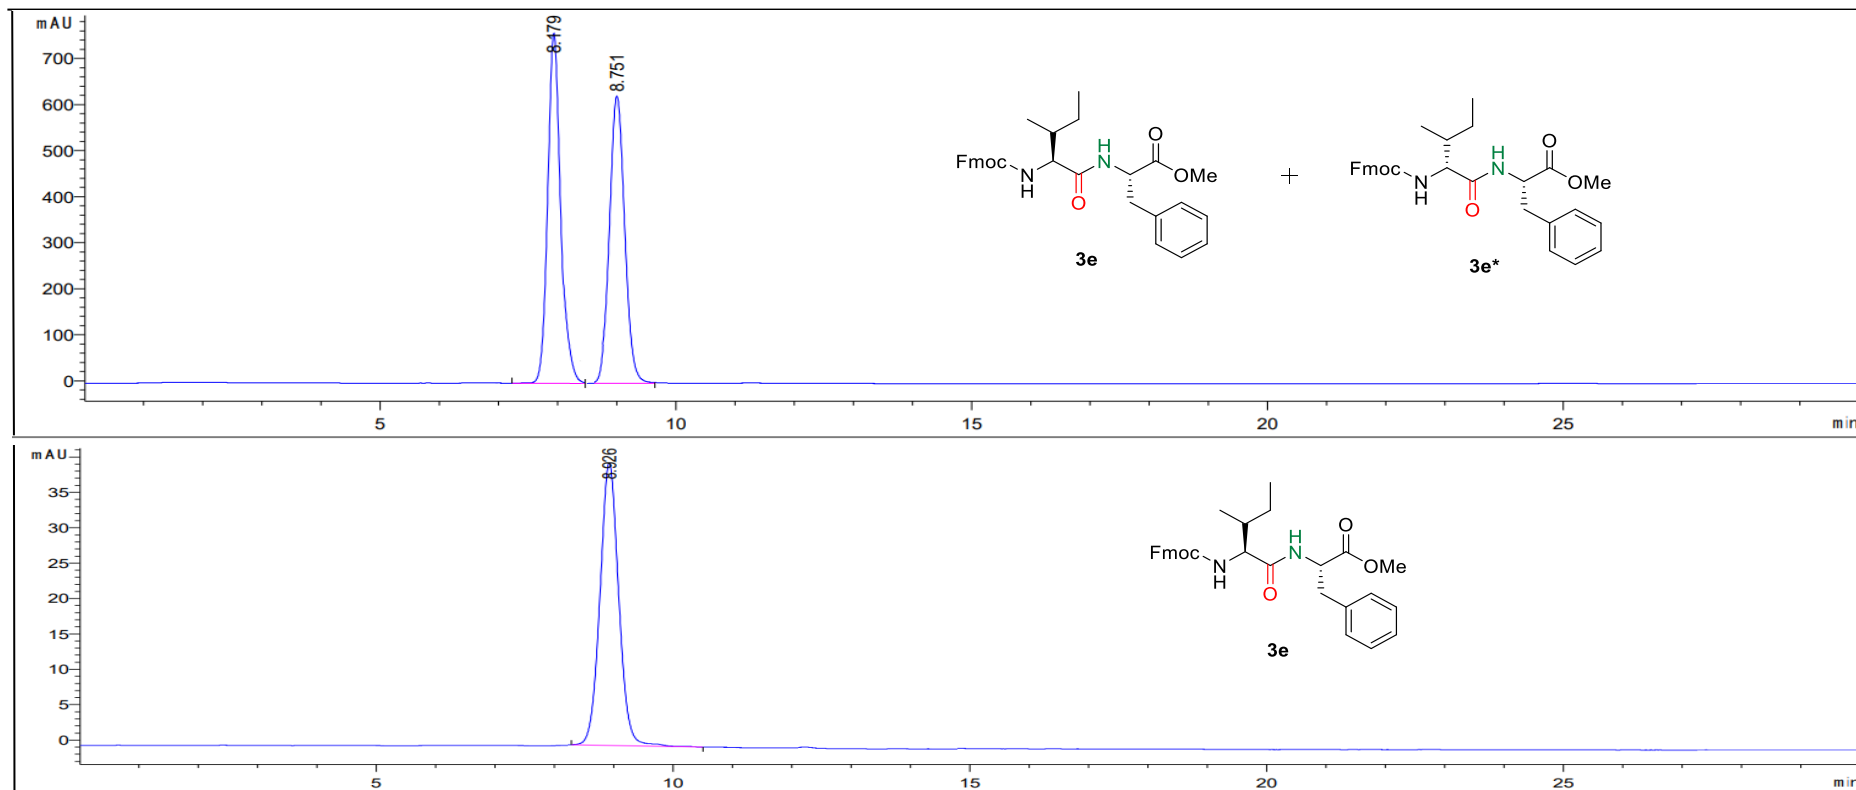

**HPLC condition:** water-methanol (30-70%) in 30 min; VWD at  $\lambda = 254$  nm; flow rate: 1 mL/min; column: phenomenex made Lux, pore size-5 $\mu$ , Cellulose-1, diameter x length = 250 x 4.6 mm).

1) Mixed HPLC data of (L,L)-3e and (D,L) 3e\*

| Peak | Ret Time [min] | Area      | Height [mAU] | Area %  |
|------|----------------|-----------|--------------|---------|
| 01   | 8.179          | 1.10687e4 | 760.18402    | 49.6071 |
| 02   | 8.751          | 1.12440e4 | 623.56458    | 50.3929 |

2) Pure HPLC data of (L,L)-3e

| Peak | Ret Time [min] | Area      | Height [mAU] | Area %   |
|------|----------------|-----------|--------------|----------|
| 01   | 8.926          | 878.66614 | 39.93617     | 100.0000 |

## HPLC studies for determining racemization of 3f

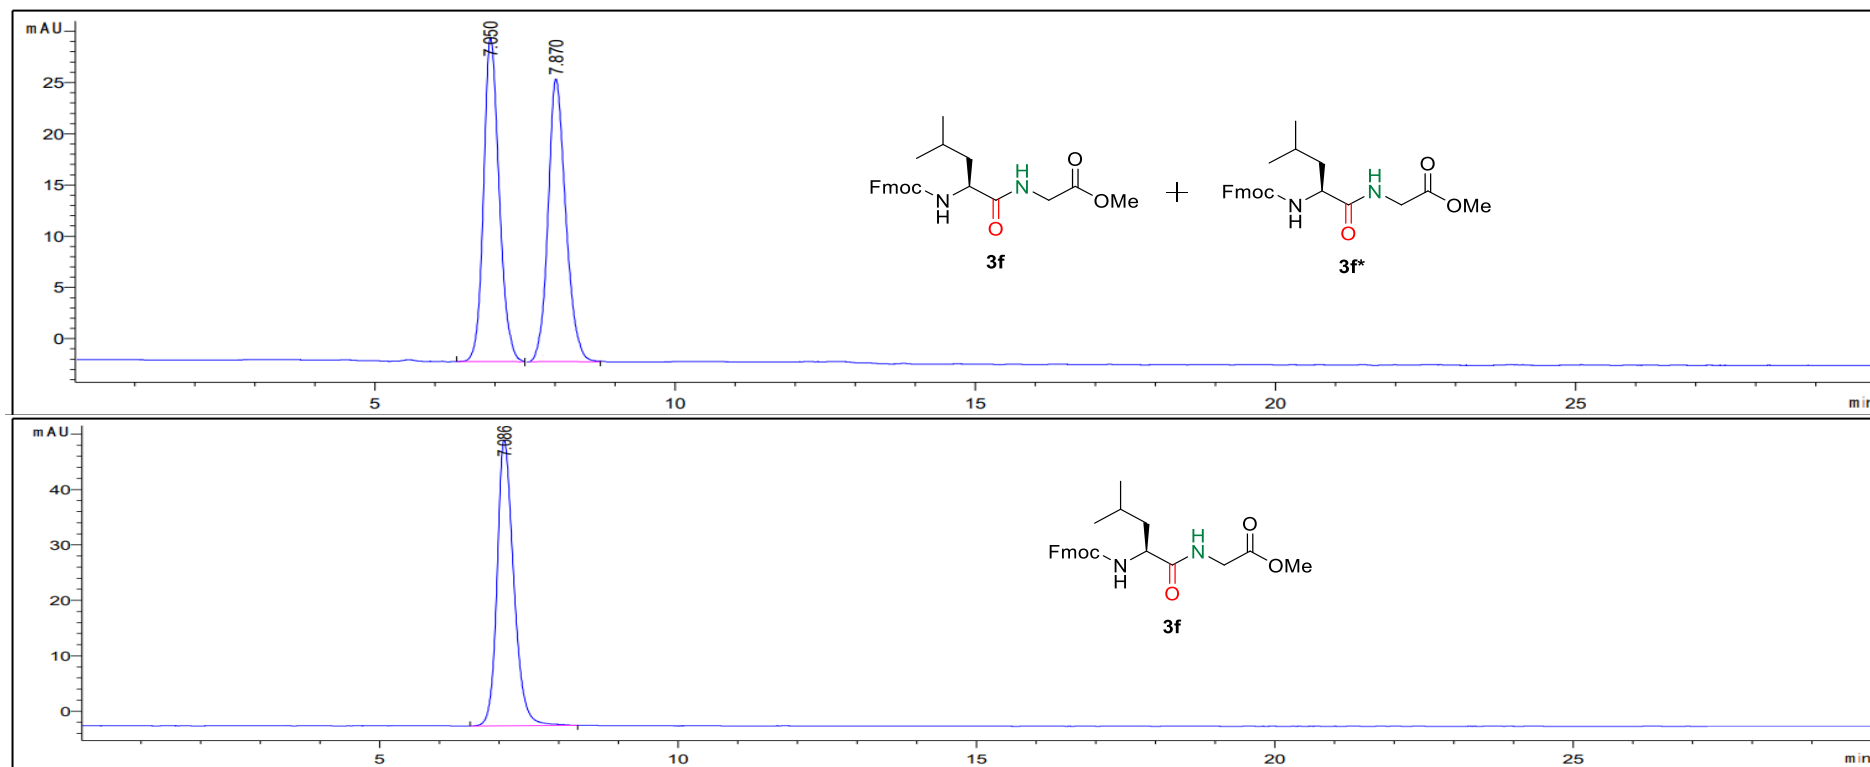

**HPLC condition:** water-acetonitrile (25-75%) in 30 min; VWD at  $\lambda = 254$  nm; flow rate: 1 mL/min; column: phenomenex made Lux, pore size-5 $\mu$ , Cellulose-1, diameter x length = 250 x 4.6 mm).

1) Mixed HPLC data of (L,L)-3f and (D,L) 3f\*



| Peak | Ret Time [min] | Area      | Height [mAU] | Area %  |
|------|----------------|-----------|--------------|---------|
| 01   | 7.050          | 571.71155 | 31.61432     | 49.1314 |
| 02   | 7.870          | 591.92725 | 27.71265     | 50.8686 |

2) Pure HPLC data of (L,L)-3f

| Peak | Ret Time [min] | Area      | Height [mAU] | Area %   |
|------|----------------|-----------|--------------|----------|
| 01   | 7.086          | 997.24335 | 51.54872     | 100.0000 |

### HPLC studies for determining racemization of 3g

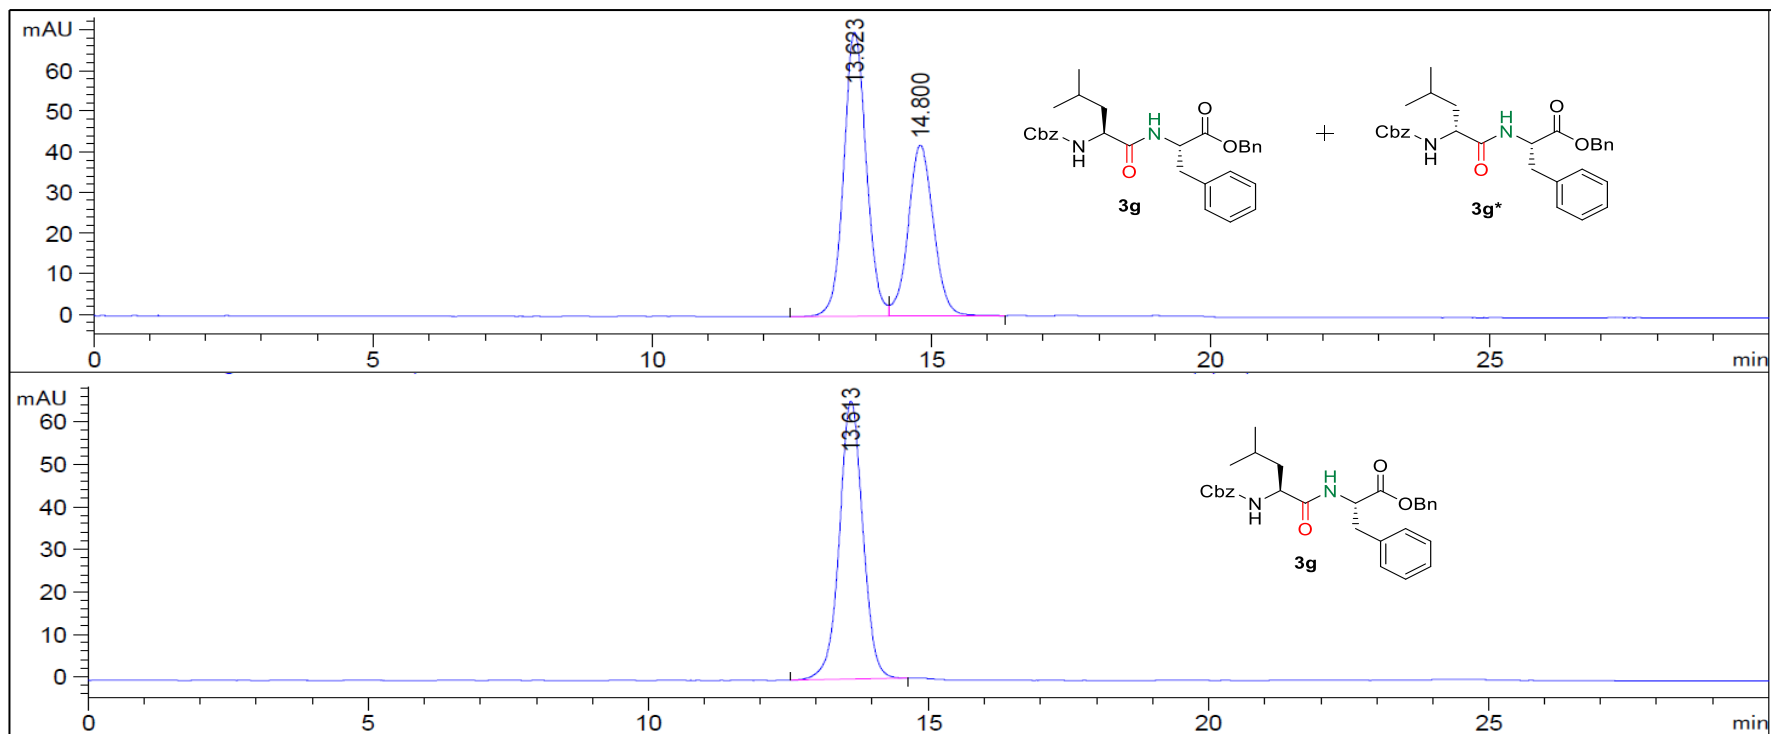

**HPLC condition:** water-acetonitrile (10-90%) in 30 min; VWD at  $\lambda = 254$  nm; flow rate: 1 mL/min; column: phenomenex made Lux, pore size-5 $\mu$ , Cellulose-1, diameter x length = 250 x 4.6 mm).

1) Mixed HPLC data of (L,L)-3g and (D,L) 3g\*

| Peak | Ret Time [min] | Area       | Height [mAU] | Area %  |
|------|----------------|------------|--------------|---------|
| 01   | 13.623         | 1964.21533 | 69.83543     | 59.7167 |
| 02   | 14.800         | 1325.00928 | 42.06074     | 40.2833 |

2) Pure HPLC data of (L,L)-3g

| Peak | Ret Time [min] | Area       | Height [mAU] | Area %   |
|------|----------------|------------|--------------|----------|
| 01   | 13.613         | 1910.98755 | 65.43951     | 100.0000 |

## HPLC studies for determining racemization of 3h

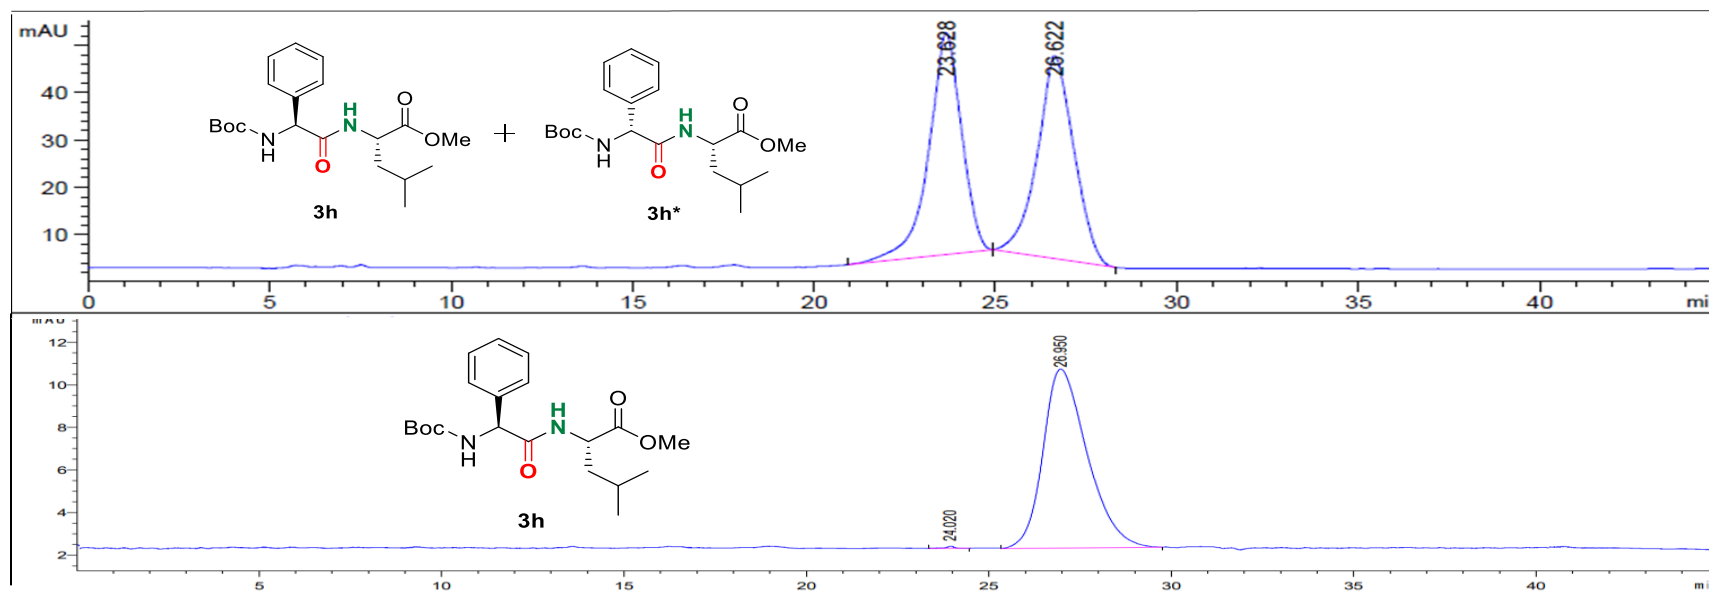

**HPLC condition:** water-acetonitrile (45-55%) in 45 min; VWD at  $\lambda = 254$  nm; flow rate: 0.5 mL/min; column: phenomenex made Lux, pore size-5 $\mu$ , Cellulose-1, diameter x length = 250 x 4.6 mm).

### 1) Mixed HPLC data of (L,L) 3h and (D,L) 3h\*

| Peak | Ret Time [min] | Area       | Height [mAU] | Area %  |
|------|----------------|------------|--------------|---------|
| 01   | 23.628         | 2936.18945 | 46.86104     | 49.4232 |
| 02   | 26.622         | 3004.72339 | 42.84006     | 50.5768 |

2) Pure HPLC data of (L,L) 3h

| Peak | Ret Time [min] | Area       | Height [mAU] | Area %  |
|------|----------------|------------|--------------|---------|
| 01   | 26.950         | 3071.90132 | 10.98769     | 99.1460 |
| 02   | 24.020         | 10.30883   | 2.34351e-1   | 0.8540  |

**HPLC studies for determining racemization of 3I**

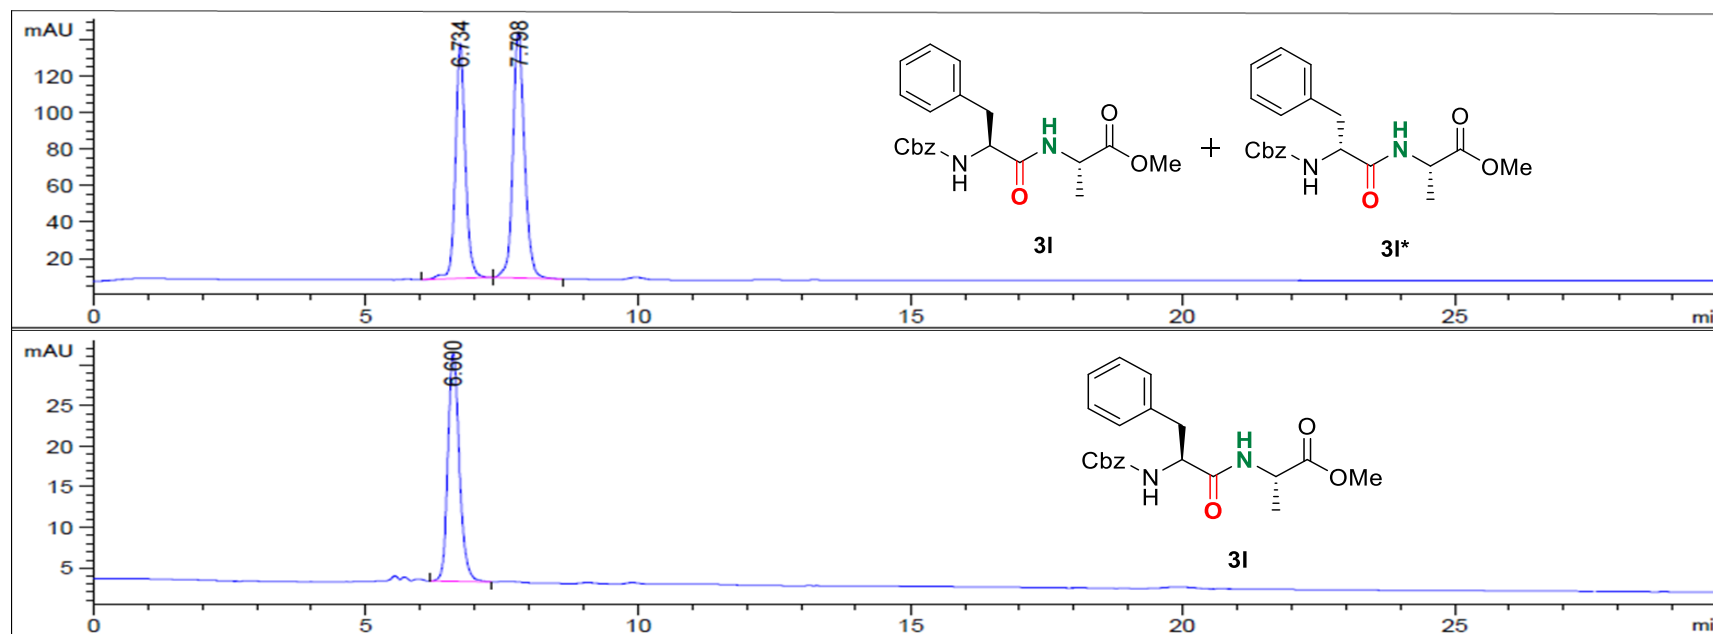

**HPLC condition:** water-acetonitrile (10-90%) in 30 min; VWD at  $\lambda = 254$  nm; flow rate: 0.5 mL/min; column: phenomenex made Lux, pore size-5 $\mu$ , Cellulose-1, diameter x length = 250 x 4.6 mm).

1) Mixed HPLC data of (L,L) 3l and (D,L) 3l\*

| Peak | Ret Time [min] | Area       | Height [mAU] | Area %  |
|------|----------------|------------|--------------|---------|
| 01   | 6.734          | 1643.57092 | 128.69798    | 45.1775 |
| 02   | 7.798          | 1994.46069 | 135.09608    | 54.8225 |

2) Pure HPLC data of (L,L) 3l

| Peak | Ret Time [min] | Area      | Height [mAU] | Area %   |
|------|----------------|-----------|--------------|----------|
| 01   | 6.600          | 413.22910 | 28.17320     | 100.0000 |

## HPLC studies for determining racemization of 3m

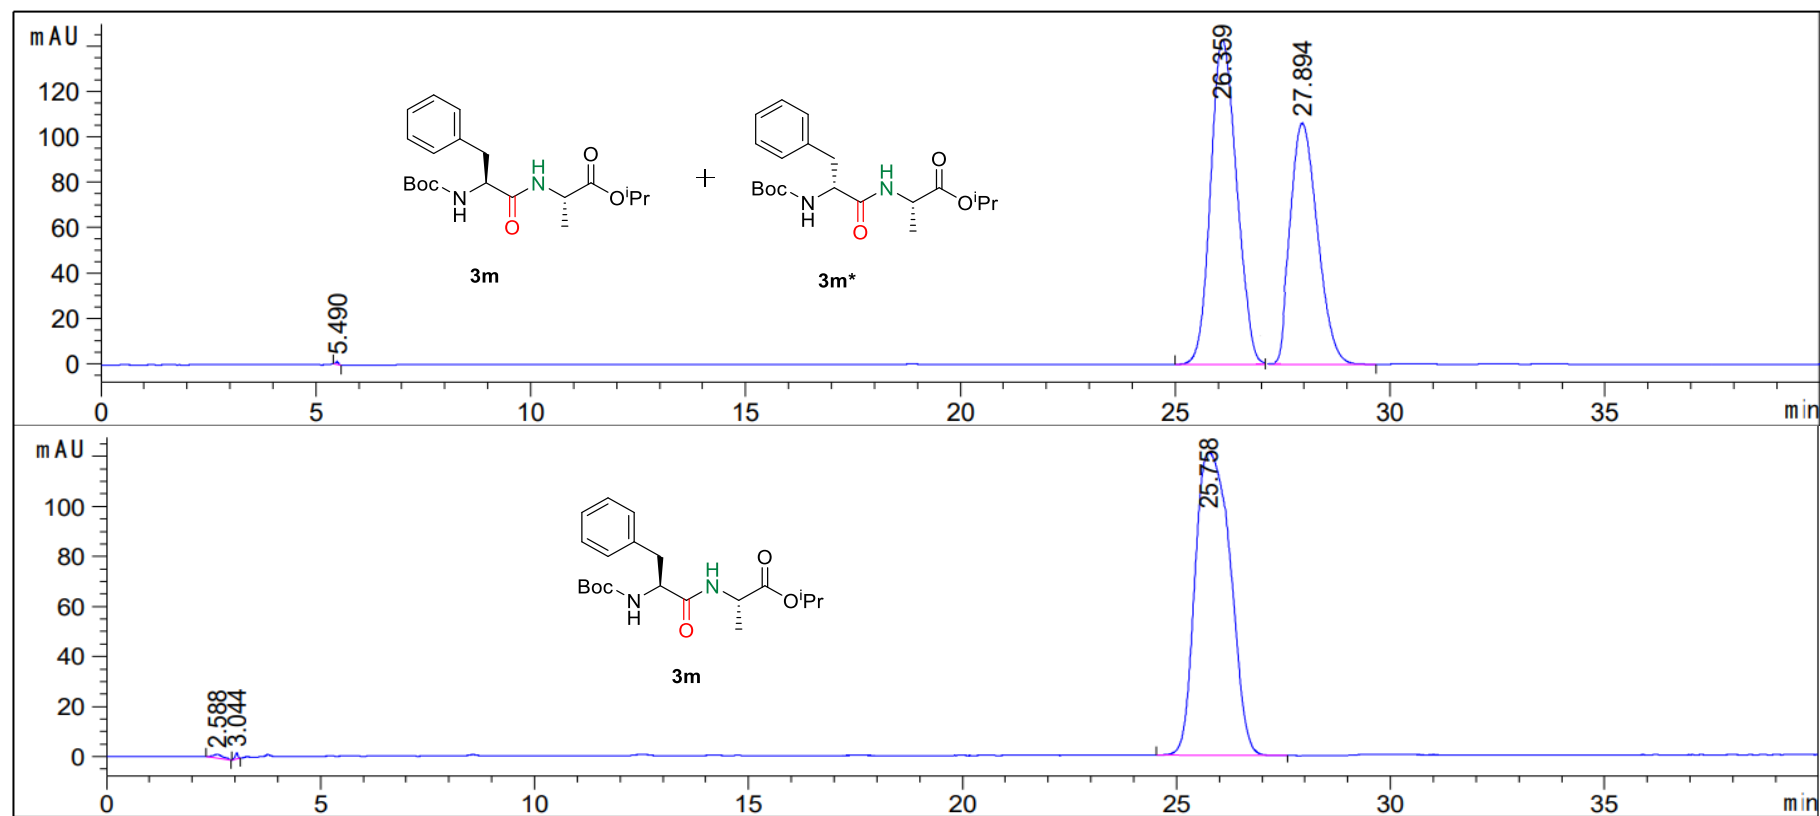

**HPLC condition:** water-acetonitrile (10-90%) in 40 min; VWD at  $\lambda = 254$  nm; flow rate: 1 mL/min; column: phenomenex made Lux, pore size-5 $\mu$ , Cellulose-1, diameter x length = 250 x 4.6 mm).

1) Mixed HPLC data of (L,L)-3m and (D,L) 3m\*

| Peak | Ret Time [min] | Area       | Height [mAU] | Area %  |
|------|----------------|------------|--------------|---------|
| 01   | 26.359         | 6084.63623 | 143.03291    | 55.5591 |
| 02   | 27.894         | 4867.00586 | 106.26966    | 44.4409 |

2) Pure HPLC data of (L,L)-3m

| Peak | Ret Time [min] | Area       | Height [mAU] | Area %  |
|------|----------------|------------|--------------|---------|
| 01   | 2.588          | 24.85943   | 1.46002      | 0.2623  |
| 02   | 3.044          | 11.20006   | 2.52789      | 0.1182  |
| 03   | 25.758         | 9443.19336 | 120.97589    | 99.6196 |

### HPLC studies for determining purity of 3d

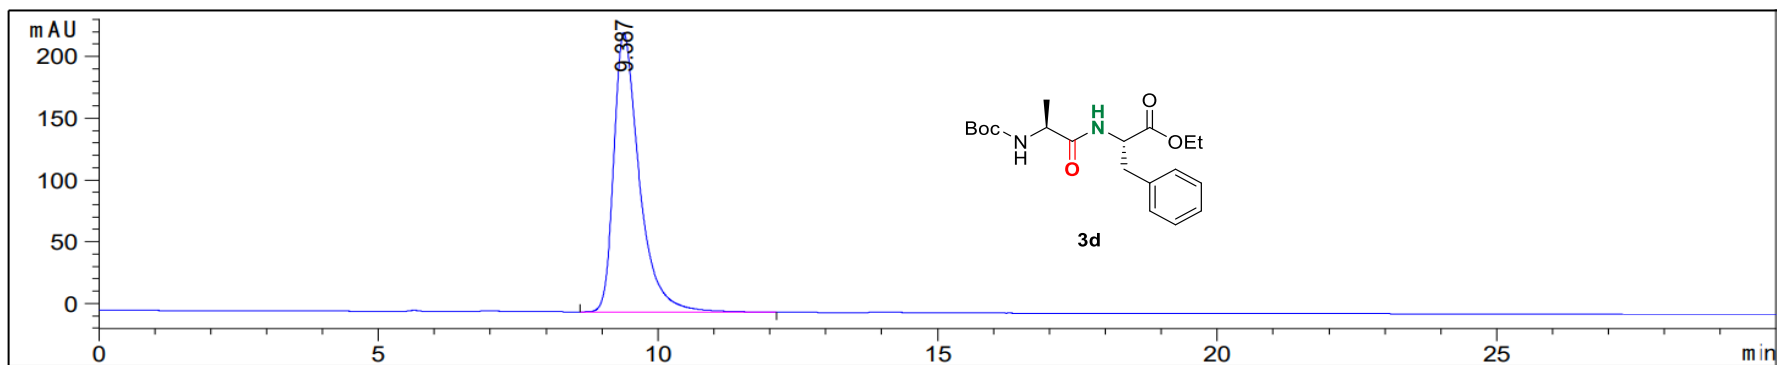

**HPLC condition:** water-acetonitrile (10-80%) in 30 min; VWD at  $\lambda = 254$  nm; flow rate: 1 mL/min; column: Eclipse XDB-C18, pore size-5 $\mu$ , diameter x length = 4.6 x 150mm).

| Peak | Ret Time [min] | Area       | Height [mAU] | Area %   |
|------|----------------|------------|--------------|----------|
| 01   | 9.387          | 7186.17773 | 226.27376    | 100.0000 |

### HPLC studies for determining purity of 3i

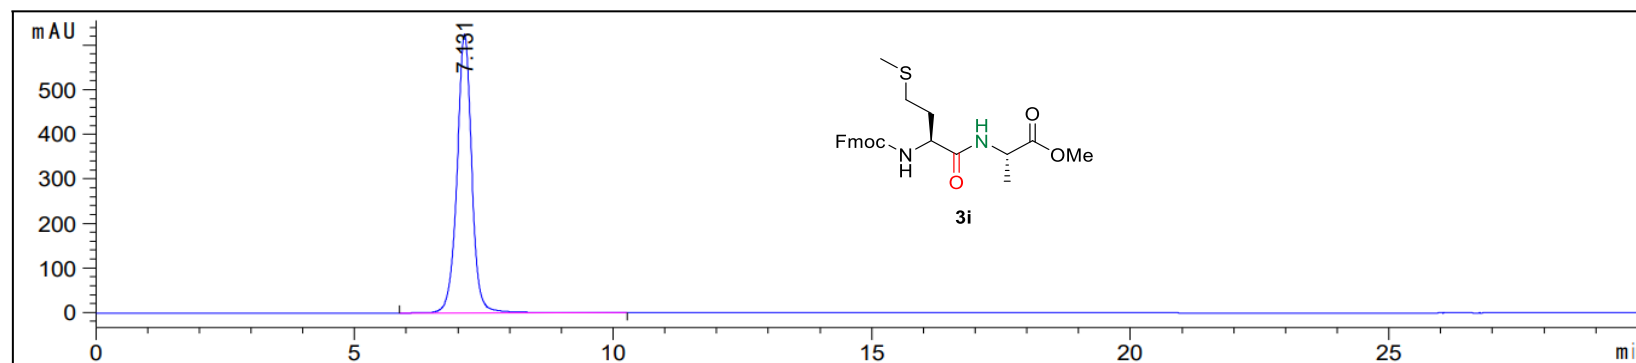

**HPLC condition:** water-acetonitrile (10-90%) in 30 min; VWD at  $\lambda = 254$  nm; flow rate: 1 mL/min; column: Eclipse XDB-C18, pore size-5 $\mu$ , diameter x length = 4.6 x 150mm).



| Peak | Ret Time [min] | Area      | Height [mAU] | Area %   |
|------|----------------|-----------|--------------|----------|
| 01   | 7.131          | 1.24626e4 | 626.05316    | 100.0000 |

### HPLC studies for determining purity of 3j

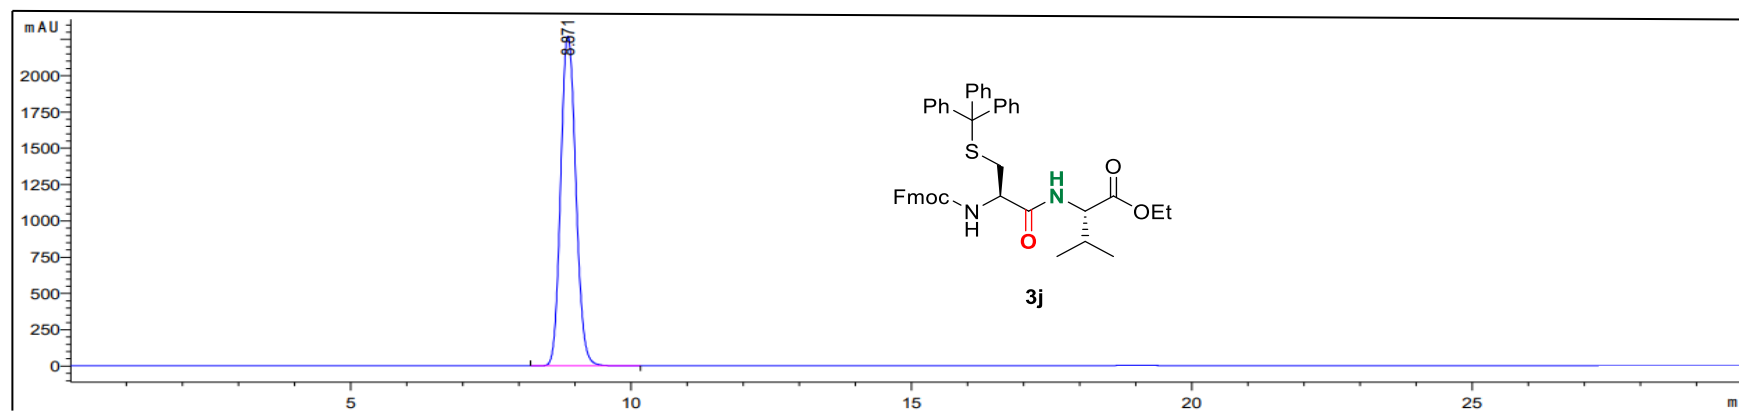

**HPLC condition:** water-methanol (10-90%) in 30 min; VWD at  $\lambda = 254$  nm; flow rate: 1 mL/min; column: Eclipse XDB-C18, pore size-5 $\mu$ , diameter x length = 4.6 x 150mm).

| Peak | Ret Time [min] | Area      | Height [mAU] | Area %   |
|------|----------------|-----------|--------------|----------|
| 01   | 8.871          | 4.26956e4 | 2271.42090   | 100.0000 |

## HPLC studies for determining purity of 3k

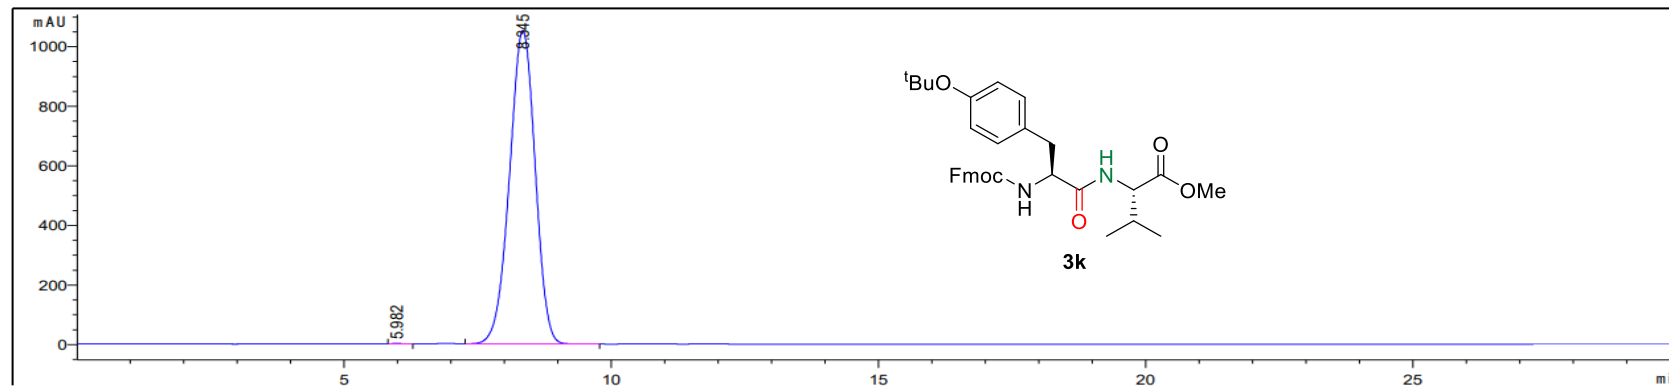

**HPLC condition:** water-acetonitrile (10-90%) in 30 min; VWD at  $\lambda = 254$  nm; flow rate: 1 mL/min; column: Eclipse XDB-C18, pore size- $5\mu$ , diameter x length = 4.6 x 150mm).

| Peak | Ret Time [min] | Area      | Height [mAU] | Area %  |
|------|----------------|-----------|--------------|---------|
| 01   | 5.982          | 13.60264  | 1.26654      | 0.0387  |
| 02   | 8.345          | 3.51652e4 | 1052.47986   | 99.9613 |

## HPLC studies for determining purity of 3n

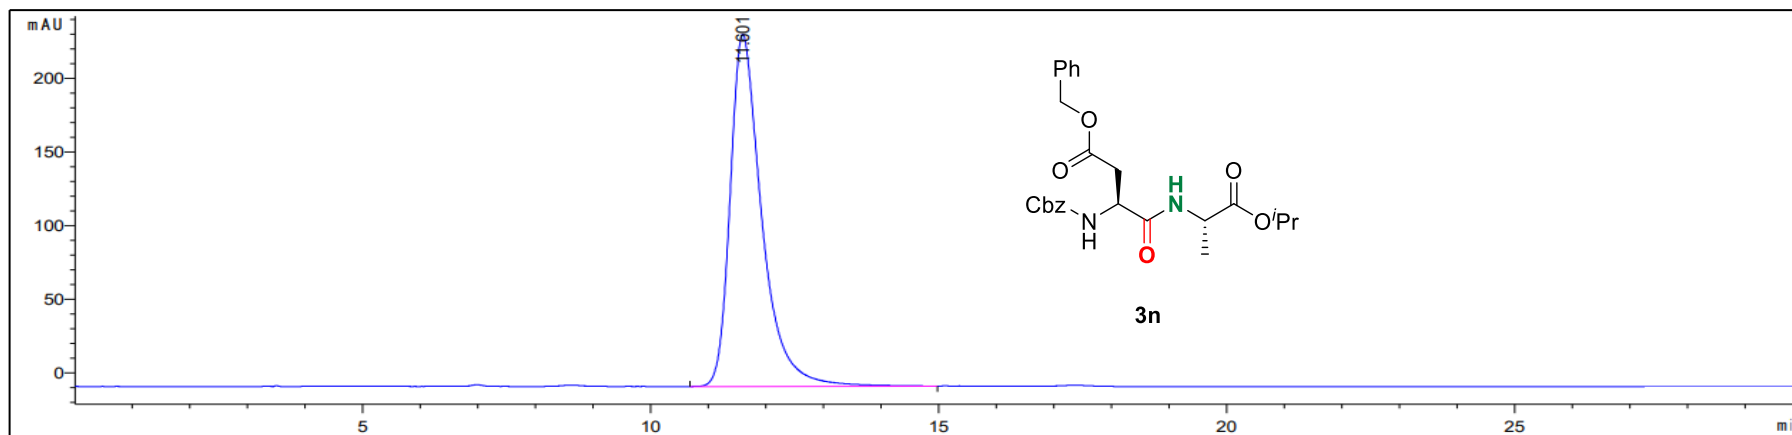

**HPLC condition:** water-methanol (10-80%) in 30 min; VWD at  $\lambda = 254$  nm; flow rate: 1 mL/min; column: Eclipse XDB-C18, pore size-5 $\mu$ , diameter x length = 4.6 x 150mm).

| Peak | Ret Time [min] | Area       | Height [mAU] | Area %   |
|------|----------------|------------|--------------|----------|
| 01   | 11.601         | 9131.27148 | 239.25229    | 100.0000 |

## HPLC studies for determining purity of 3o

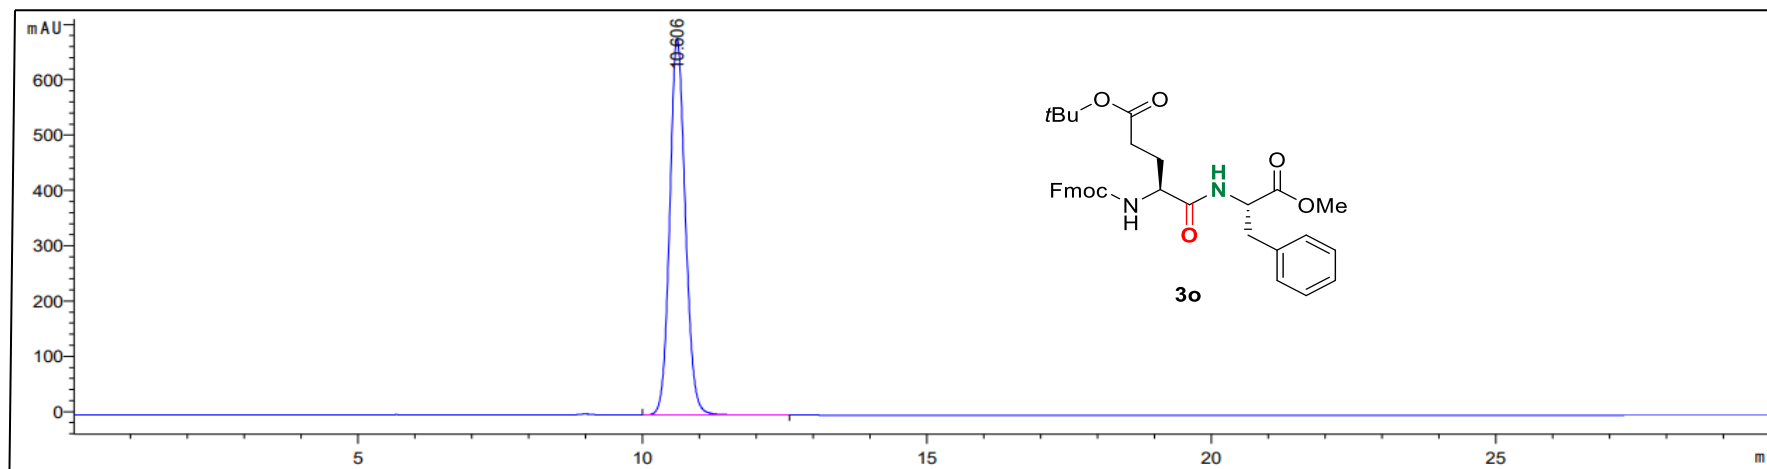

**HPLC condition:** water-methanol (10-90%) in 30 min; VWD at  $\lambda = 254$  nm; flow rate: 1 mL/min; column: Eclipse XDB-C18, pore size-5 $\mu$ , diameter x length = 4.6 x 150mm).

| Peak | Ret Time [min] | Area      | Height [mAU] | Area %   |
|------|----------------|-----------|--------------|----------|
| 01   | 10.606         | 1.30119e4 | 681.39630    | 100.0000 |

## HPLC studies for determining purity of 3p

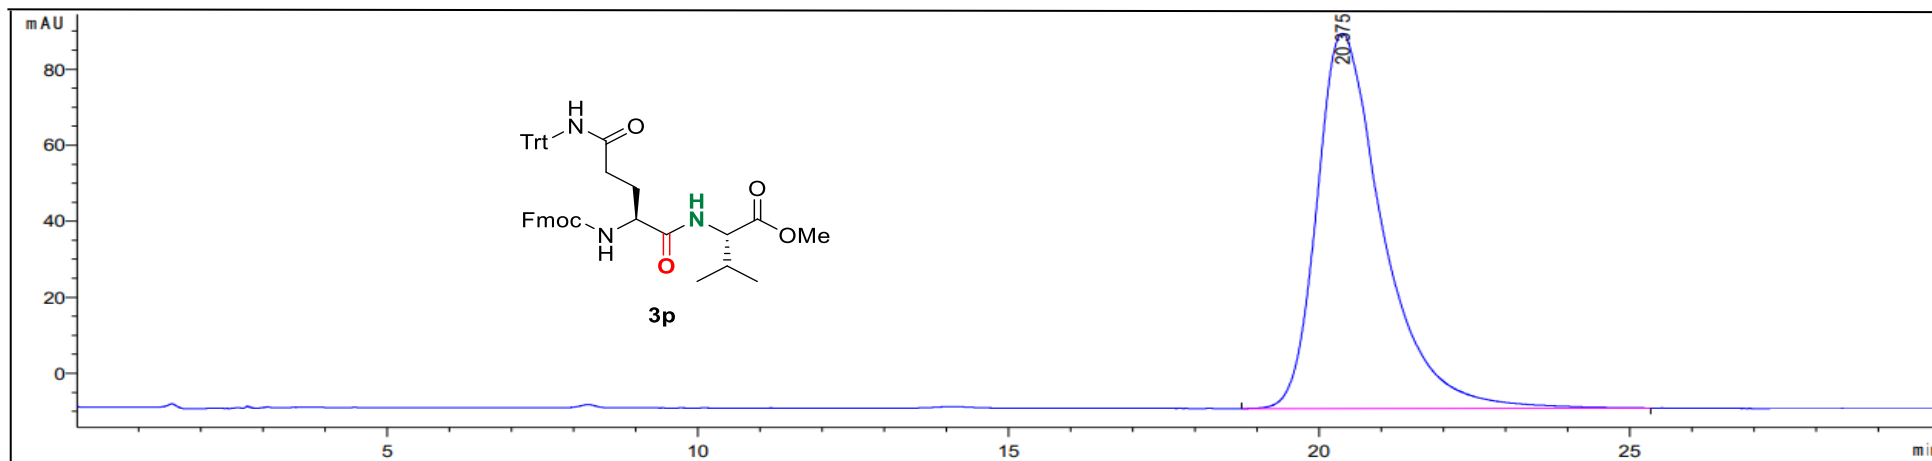

**HPLC condition:** water-methanol (10-90%) in 30 min; VWD at  $\lambda = 254$  nm; flow rate: 1 mL/min; column: Eclipse XDB-C18, pore size-5 $\mu$ , diameter x length = 4.6 x 150mm).

| Peak | Ret Time [min] | Area       | Height [mAU] | Area %   |
|------|----------------|------------|--------------|----------|
| 01   | 20.375         | 7294.27002 | 98.69247     | 100.0000 |

## HPLC studies for determining purity of 3q

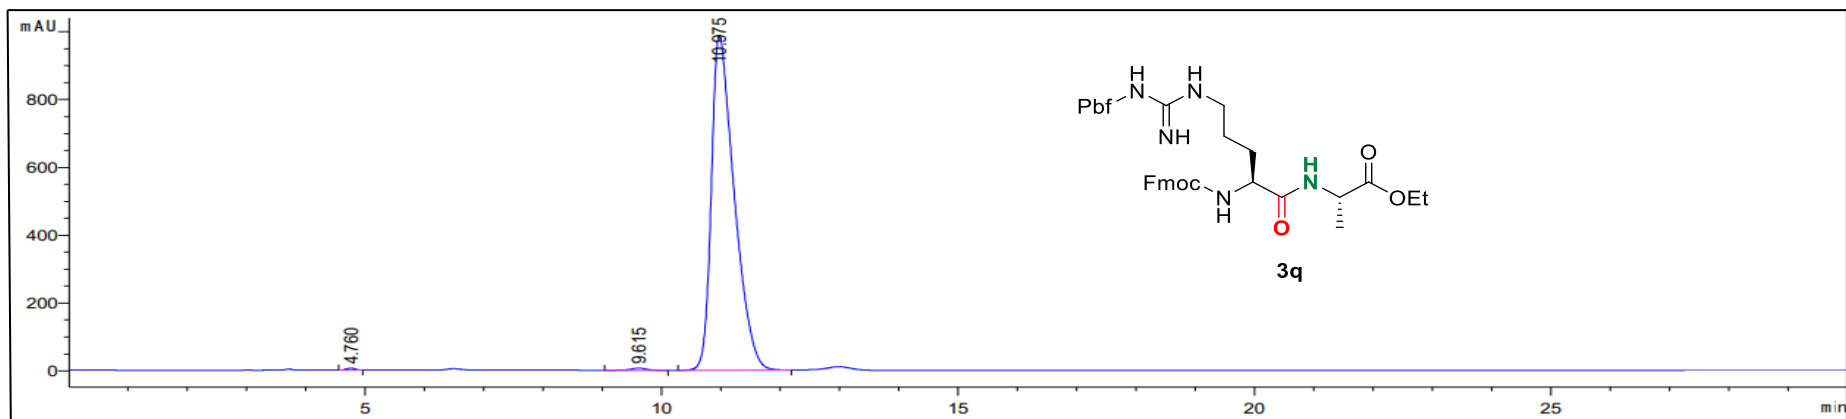

**HPLC condition:** water-methanol (10-90%) in 30 min; VWD at  $\lambda = 254$  nm; flow rate: 1 mL/min; column: Eclipse XDB-C18, pore size-5 $\mu$ , diameter x length = 4.6 x 150mm).

| Peak | Ret Time [min] | Area      | Height [mAU] | Area %  |
|------|----------------|-----------|--------------|---------|
| 01   | 4.760          | 49.42589  | 5.50452      | 0.1857  |
| 02   | 9.615          | 107.03154 | 6.03026      | 0.4022  |
| 03   | 10.975         | 2.64578e4 | 988.27802    | 99.4121 |

## HPLC studies for determining purity of 3r

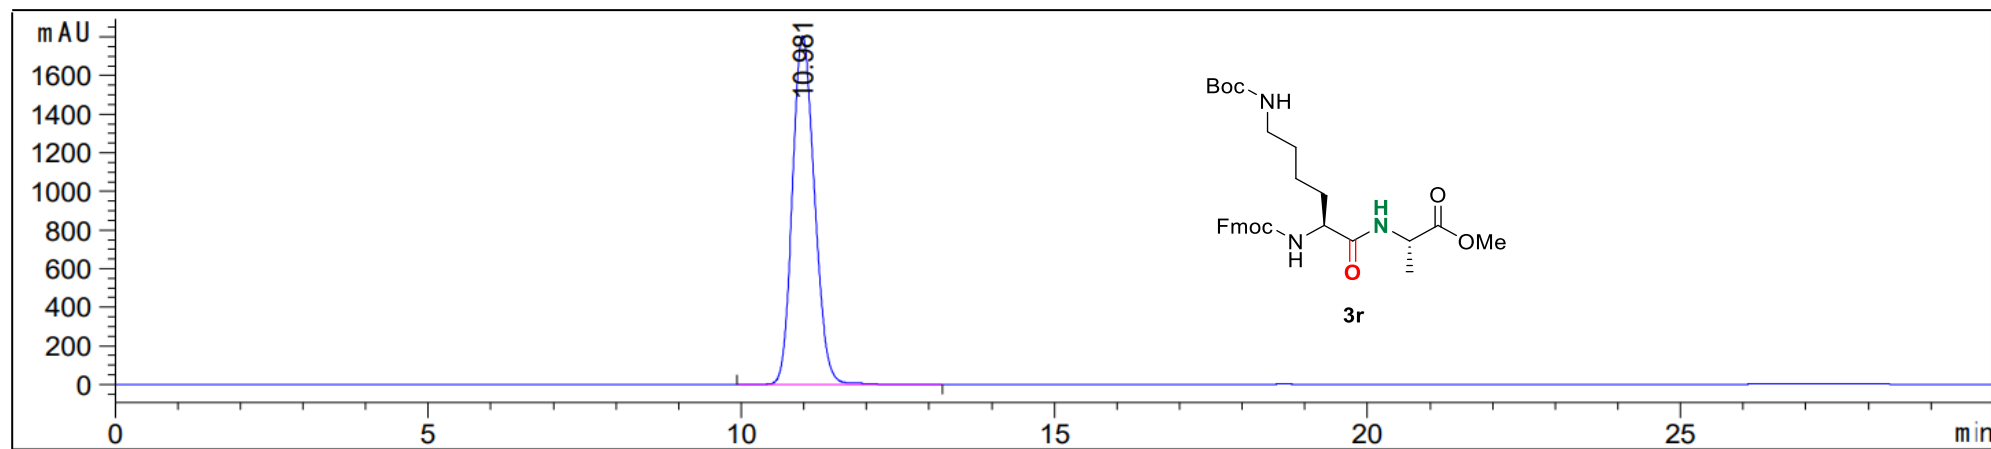

**HPLC condition:** water-acetonitrile (10-90%) in 30 min; VWD at  $\lambda = 254$  nm; flow rate: 1 mL/min; column: Eclipse XDB-C18, pore size-5 $\mu$ , diameter x length = 4.6 x 150mm).

| Peak | Ret Time [min] | Area      | Height [mAU] | Area %   |
|------|----------------|-----------|--------------|----------|
| 01   | 10.981         | 4.41475e4 | 1804.00330   | 100.0000 |

## HPLC studies for determining purity of 6a

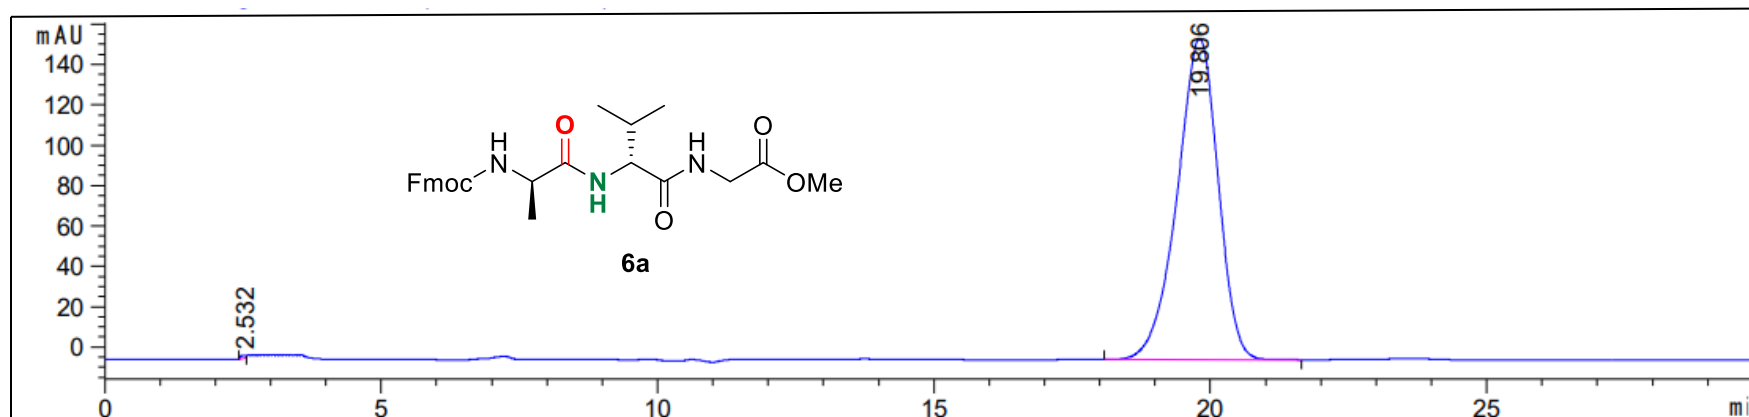

**HPLC condition:** water-methanol (10-90%) in 30 min; VWD at  $\lambda = 254$  nm; flow rate: 1 mL/min; column: Eclipse XDB-C18, pore size- $5\mu$ , diameter x length = 4.6 x 150mm).

| Peak | Ret Time [min] | Area       | Height [mAU] | Area %  |
|------|----------------|------------|--------------|---------|
| 01   | 2.532          | 8.98613    | 1.41761      | 0.1095  |
| 02   | 19.806         | 8194.95605 | 159.09897    | 99.8905 |



## HPLC studies for determining purity of 6b

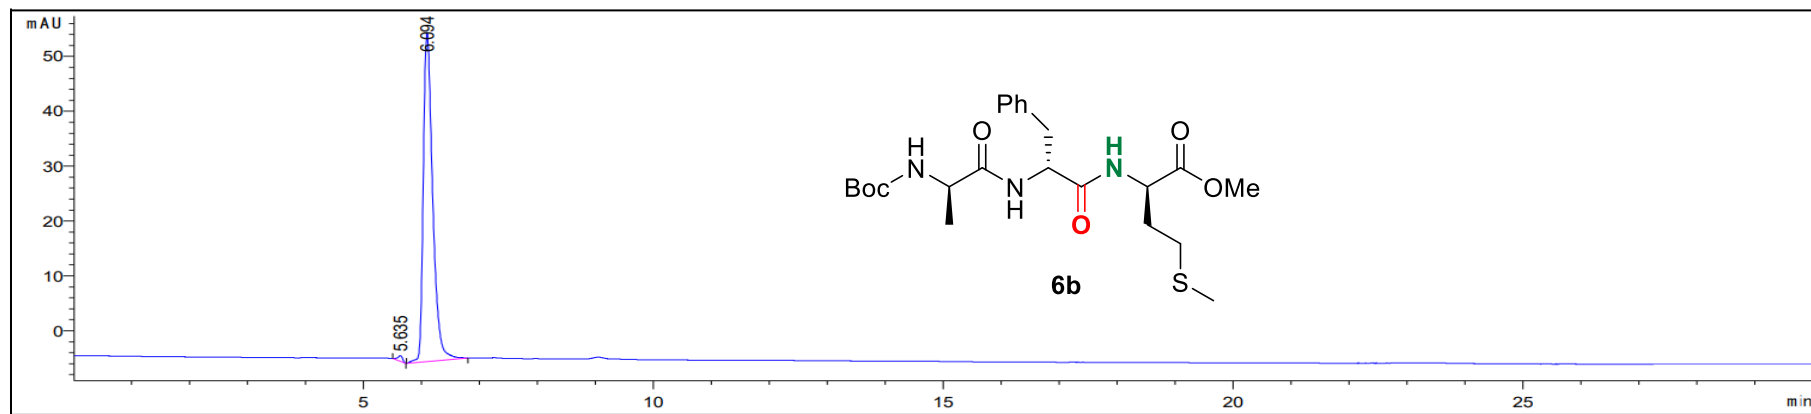

**HPLC condition:** water-acetonitrile (10-80%) in 30 min; VWD at  $\lambda = 254$  nm; flow rate: 1 mL/min; column: Eclipse XDB-C18, pore size-5 $\mu$ , diameter x length = 4.6 x 150mm).

| Peak | Ret Time [min] | Area      | Height [mAU] | Area %  |
|------|----------------|-----------|--------------|---------|
| 01   | 5.635          | 5.76925   | 1.02053      | 0.8540  |
| 02   | 6.094          | 669.78314 | 59.91338     | 99.1460 |

## HPLC studies for determining purity of 6c

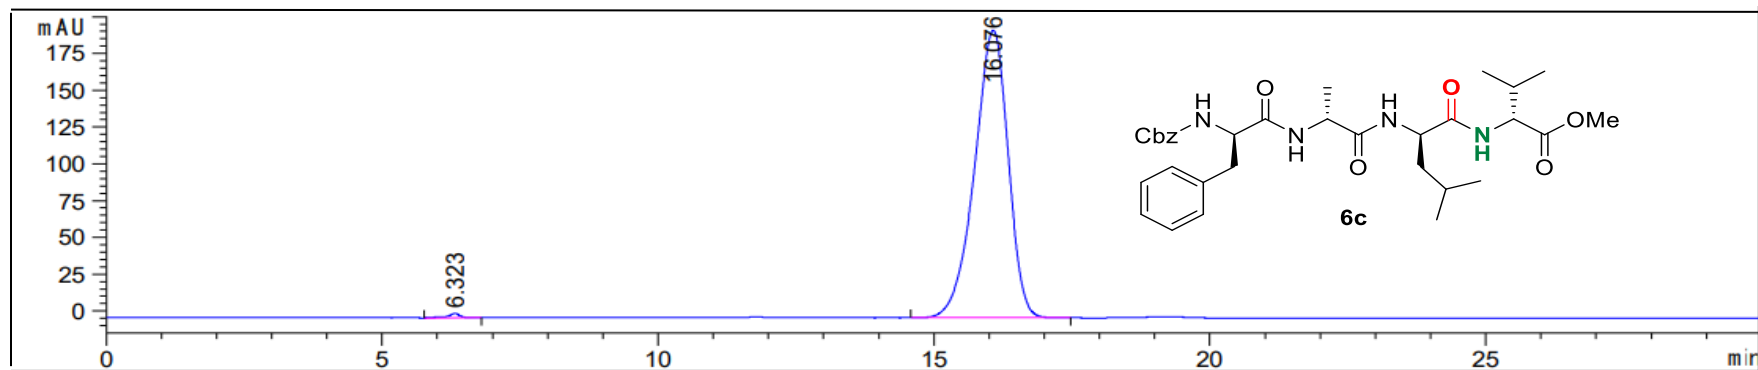

**HPLC condition:** water-methanol (10-95%) in 30 min; VWD at  $\lambda = 254$  nm; flow rate: 1 mL/min; column: Eclipse XDB-C18, pore size-5 $\mu$ , diameter x length = 4.6 x 150mm).

| Peak | Ret Time [min] | Area       | Height [mAU] | Area %  |
|------|----------------|------------|--------------|---------|
| 01   | 6.323          | 46.68183   | 3.01123      | 0.5603  |
| 02   | 16.076         | 8285.20215 | 195.39769    | 99.4397 |

## HPLC studies for determining purity of 6d

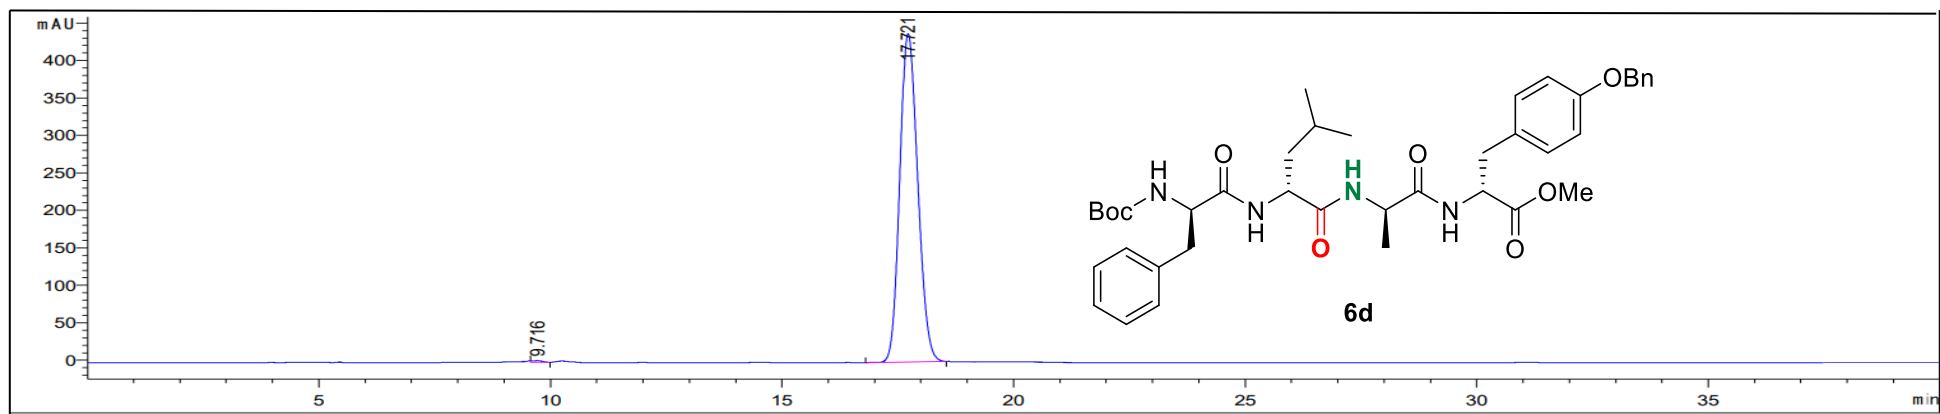

**HPLC condition:** water-methanol (10-90%) in 40 min; VWD at  $\lambda = 254$  nm; flow rate: 1 mL/min; column: Eclipse XDB-C18, pore size-5 $\mu$ , diameter x length = 4.6 x 150mm).

| Peak | Ret Time [min] | Area      | Height [mAU] | Area %  |
|------|----------------|-----------|--------------|---------|
| 01   | 9.716          | 30.02806  | 3.01123      | 2.08486 |
| 02   | 17.721         | 1.17986e4 | 438.12491    | 99.7461 |

## HPLC studies for determining racemization of 9i

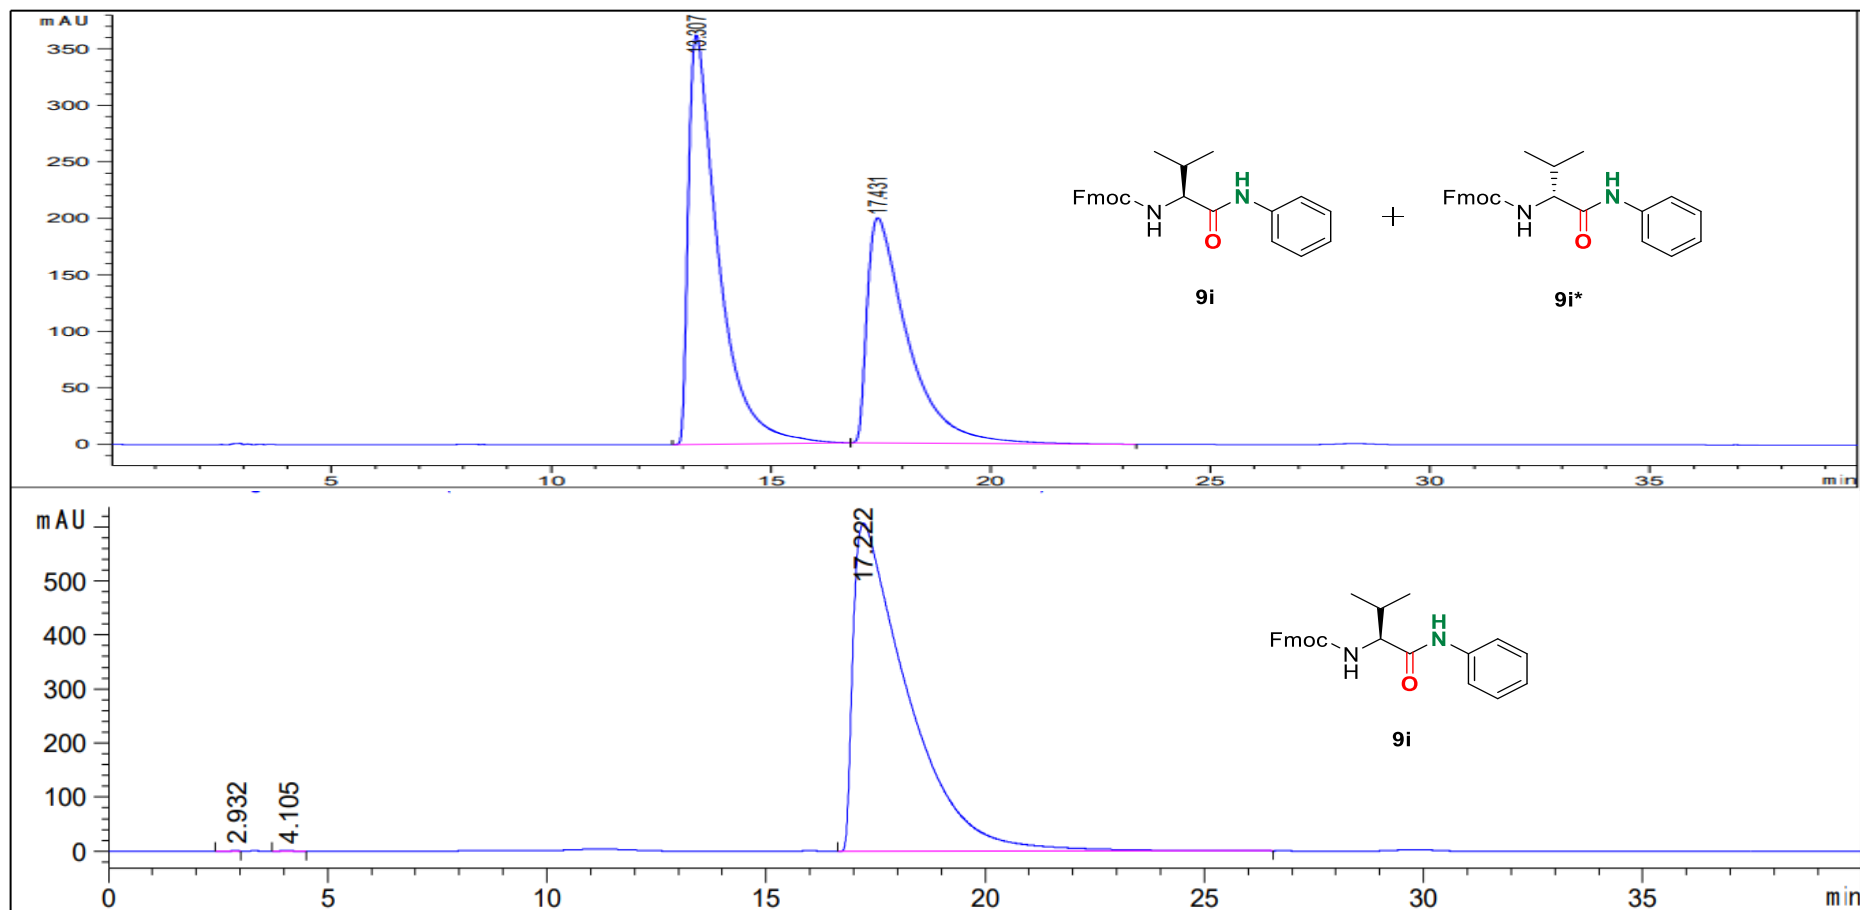

**HPLC condition:** water-acetonitrile (20-80%) in 40 min; VWD at  $\lambda = 254$  nm; flow rate: 1 mL/min; column: phenomenex made Lux, pore size-5 $\mu$ , Cellulose-1, diameter x length = 250 x 4.6 mm).

1) Mixed HPLC data of (L)-9i and (D) 9i\*

| Peak | Ret Time [min] | Area      | Height [mAU] | Area %  |
|------|----------------|-----------|--------------|---------|
| 01   | 13.307         | 1.70683e4 | 361.95816    | 57.3414 |
| 02   | 17.431         | 1.26978e4 | 199.26224    | 42.6586 |

2) Pure HPLC data of (L)-9i

| Peak | Ret Time [min] | Area      | Height [mAU] | Area %  |
|------|----------------|-----------|--------------|---------|
| 01   | 2.932          | 12.77854  | 1.15554      | 0.0243  |
| 02   | 4.105          | 15.76748  | 1.20070      | 0.0300  |
| 03   | 17.222         | 5.25043e4 | 606.95490    | 99.9457 |

## HPLC studies for determining purity of 9j

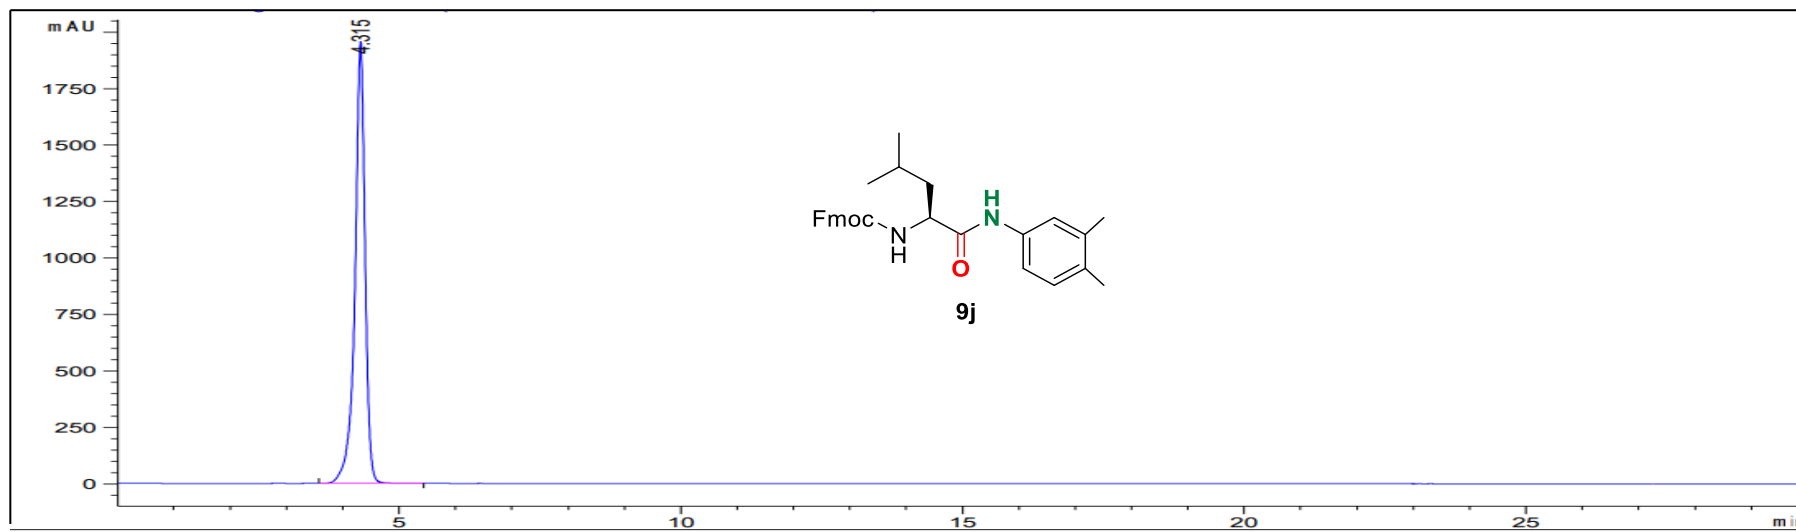

**HPLC condition:** water-methanol (10-80%) in 30 min; VWD at  $\lambda = 254$  nm; flow rate: 1 mL/min; column: Eclipse XDB-C18, pore size-5 $\mu$ , diameter x length = 4.6 x 150mm).

| Peak | Ret Time [min] | Area      | Height [mAU] | Area %   |
|------|----------------|-----------|--------------|----------|
| 01   | 4.315          | 2.46149e4 | 1954.96155   | 100.0000 |

## HPLC studies for determining purity of 9k

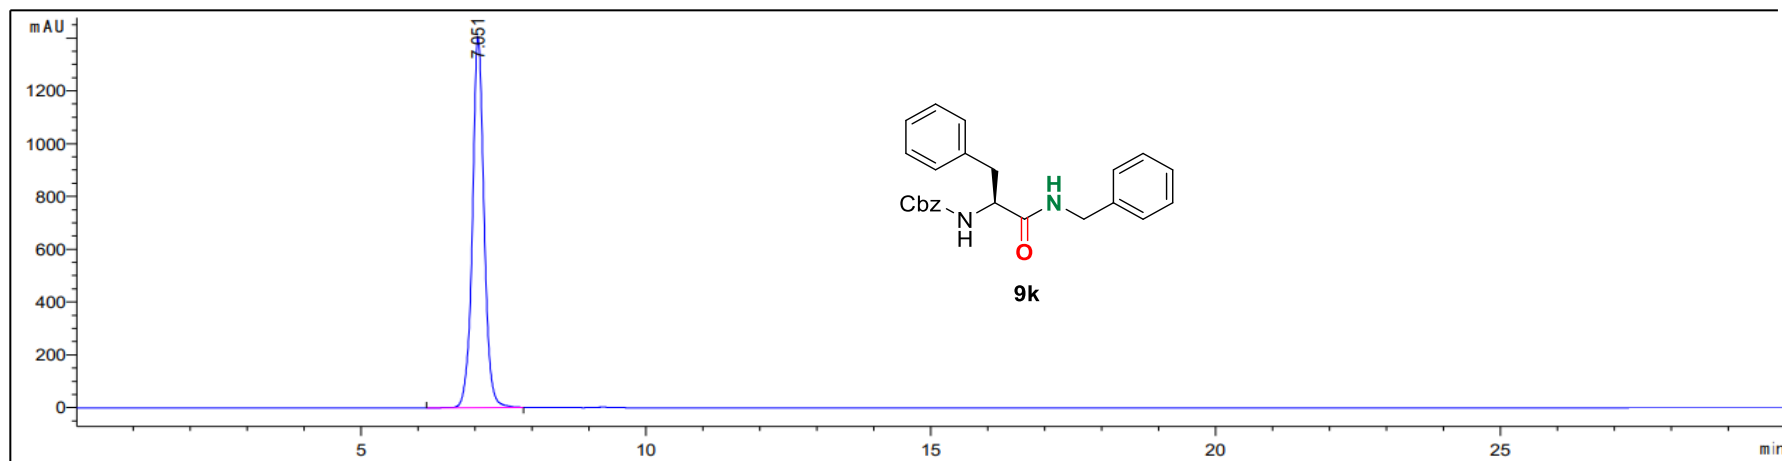

**HPLC condition:** water-acetonitrile (10-90%) in 30 min; VWD at  $\lambda = 254$  nm; flow rate: 1 mL/min; column: Eclipse XDB-C18, pore size-5 $\mu$ , diameter x length = 4.6 x 150mm).

| Peak | Ret Time [min] | Area      | Height [mAU] | Area %   |
|------|----------------|-----------|--------------|----------|
| 01   | 7.051          | 1.99362e4 | 1405.59753   | 100.0000 |

## HPLC studies for determining purity of 91

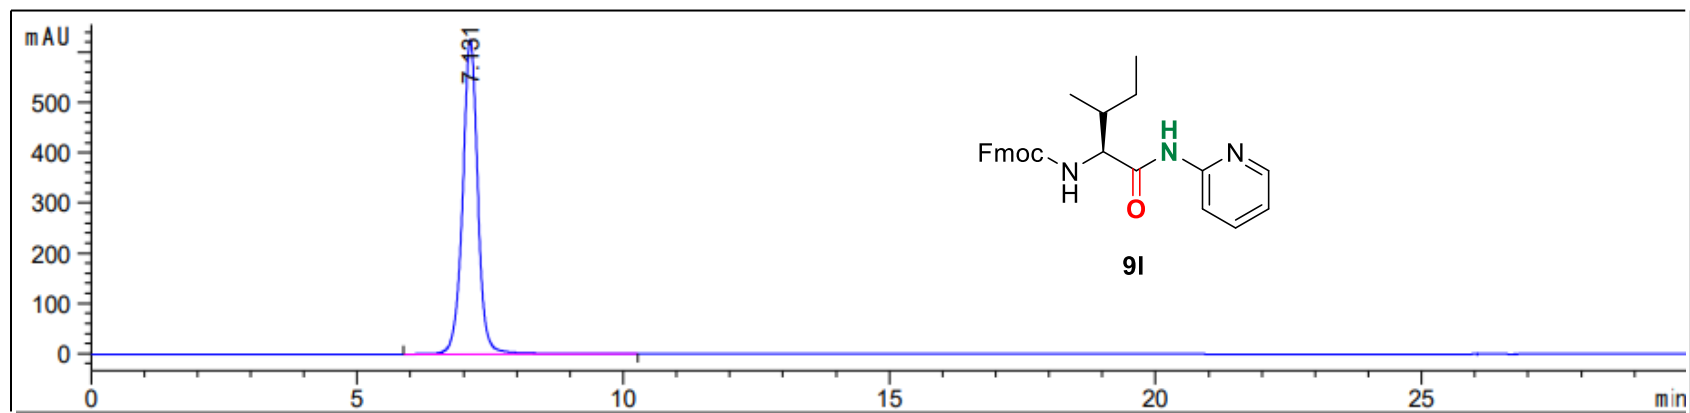

**HPLC condition:** water-methanol (10-90%) in 30 min; VWD at  $\lambda = 254$  nm; flow rate: 1 mL/min; column: Eclipse XDB-C18, pore size-5 $\mu$ , diameter x length = 4.6 x 150mm).

| Peak | Ret Time [min] | Area      | Height [mAU] | Area %   |
|------|----------------|-----------|--------------|----------|
| 01   | 7.131          | 1.24626e4 | 626.05316    | 100.0000 |



## HPLC studies for determining purity of 9m

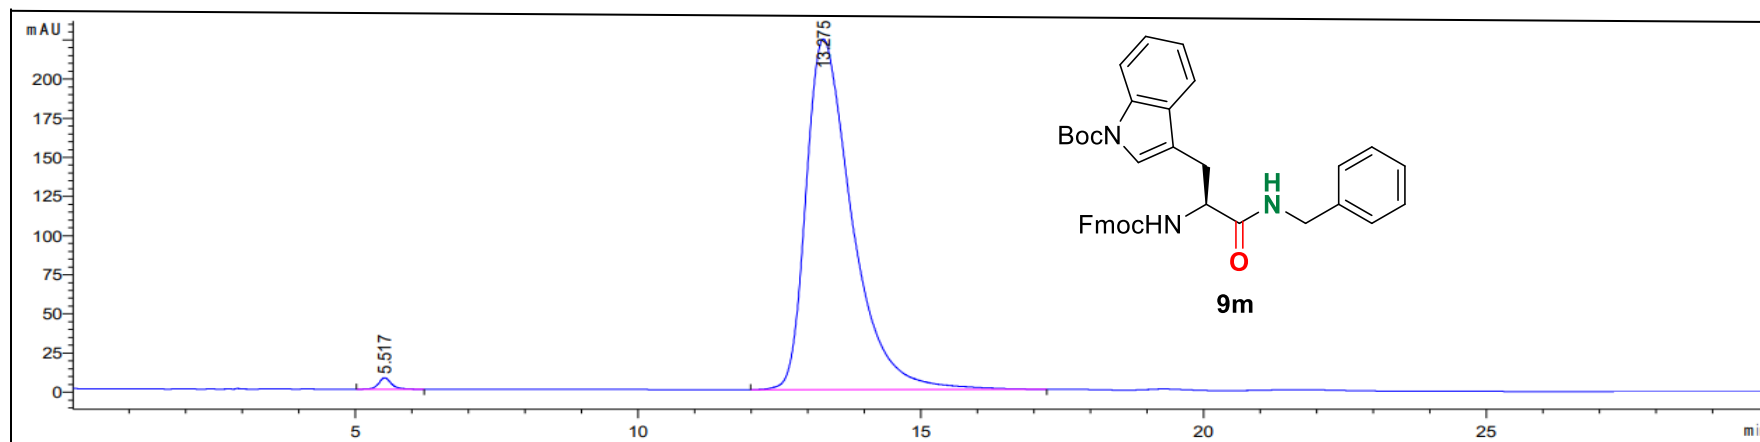

**HPLC condition:** water-methanol (10-90%) in 30 min; VWD at  $\lambda = 254$  nm; flow rate: 1 mL/min; column: Eclipse XDB-C18, pore size-5 $\mu$ , diameter x length = 4.6 x 150mm).

| Peak | Ret Time [min] | Area      | Height [mAU] | Area %  |
|------|----------------|-----------|--------------|---------|
| 01   | 5.517          | 116.08534 | 7.31107      | 0.9083  |
| 02   | 13.275         | 1.26645e4 | 224.07771    | 99.0917 |

## HPLC studies for determining purity of 11a

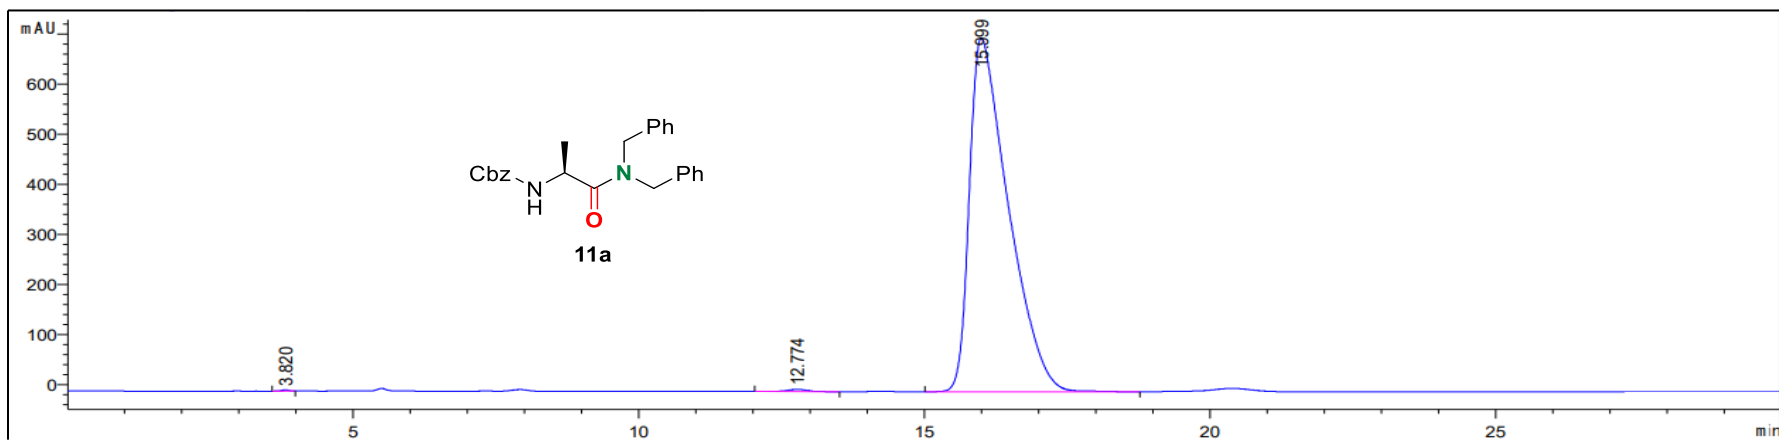

**HPLC condition:** water-methanol (10-90%) in 30 min; VWD at  $\lambda = 254$  nm; flow rate: 1 mL/min; column: Eclipse XDB-C18, pore size-5 $\mu$ , diameter x length = 4.6 x 150mm).

| Peak | Ret Time [min] | Area      | Height [mAU] | Area %  |
|------|----------------|-----------|--------------|---------|
| 01   | 3.820          | 19.06471  | 2.39236      | 0.0568  |
| 02   | 12.774         | 109.43756 | 4.34640      | 0.3263  |
| 03   | 15.999         | 3.34085e4 | 705.88959    | 99.6168 |

## HPLC studies for determining racemization of 11b

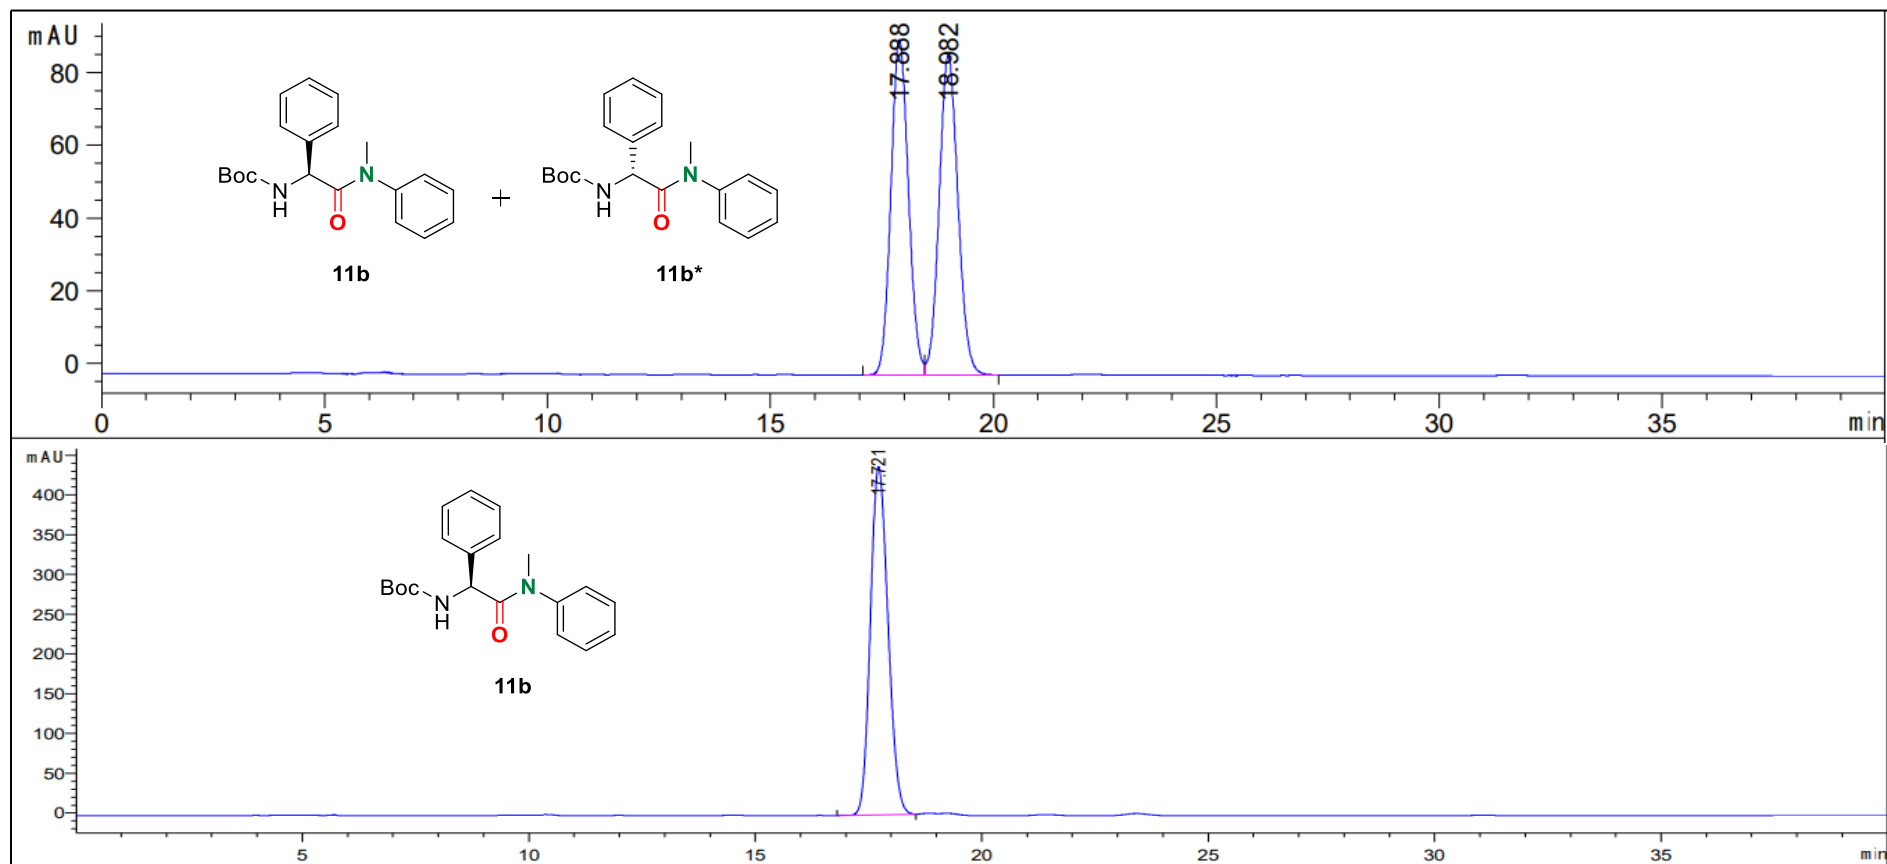

**HPLC condition:** water-acetonitrile (20-80%) in 40 min; VWD at  $\lambda = 254$  nm; flow rate: 1 mL/min; column: phenomenex made Lux, pore size- $5\mu$ , Cellulose-1, diameter x length = 250 x 4.6 mm).

1) Mixed HPLC data of (L)-11b and (D) 11b\*

| Peak | Ret Time [min] | Area       | Height [mAU] | Area %  |
|------|----------------|------------|--------------|---------|
| 01   | 17.888         | 2525.66382 | 92.45739     | 49.4966 |
| 02   | 18.982         | 2577.03687 | 88.03035     | 50.5034 |

2) Pure HPLC data of (L)-11b

| Peak | Ret Time [min] | Area      | Height [mAU] | Area %   |
|------|----------------|-----------|--------------|----------|
| 01   | 17.721         | 1.17986e4 | 438.12491    | 100.0000 |

### HPLC studies for determining purity of 11c

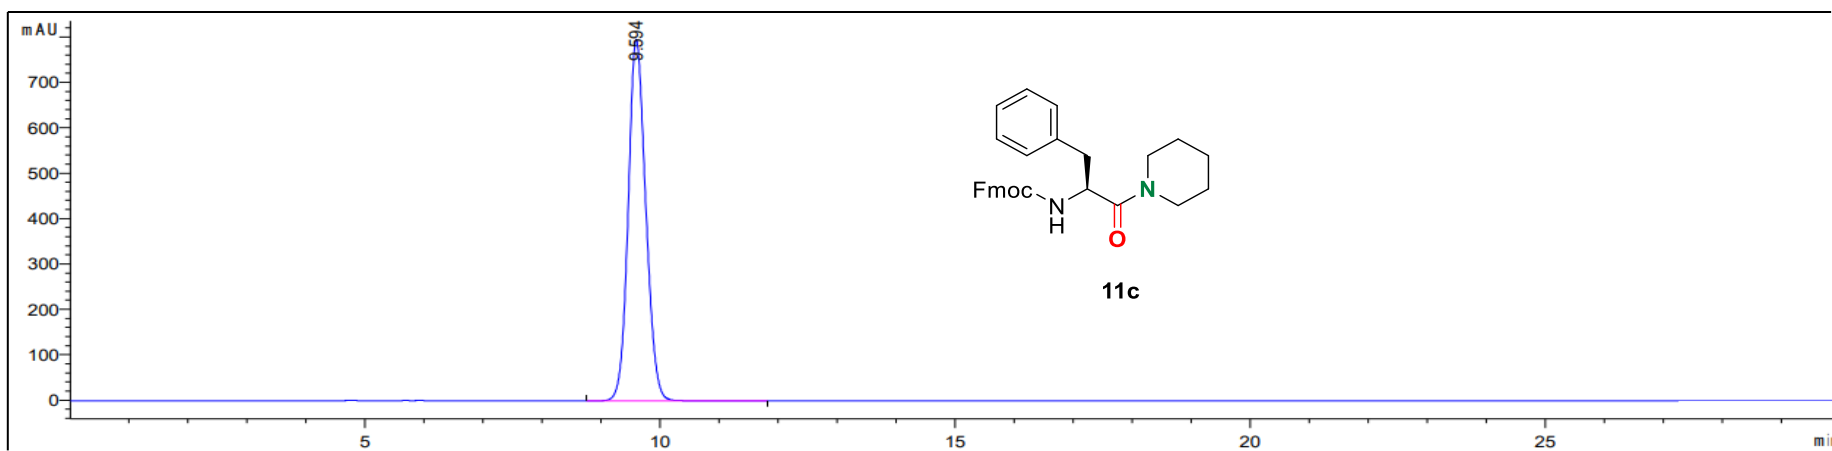

**HPLC condition:** water-methanol (10-90%) in 30 min; VWD at  $\lambda = 254$  nm; flow rate: 1 mL/min; column: Eclipse XDB-C18, pore size-5 $\mu$ , diameter x length = 4.6 x 150mm).

| Peak | Ret Time [min] | Area      | Height [mAU] | Area %   |
|------|----------------|-----------|--------------|----------|
| 01   | 9.594          | 1.64776e4 | 796.59033    | 100.0000 |

### HPLC studies for determining racemization of 13a

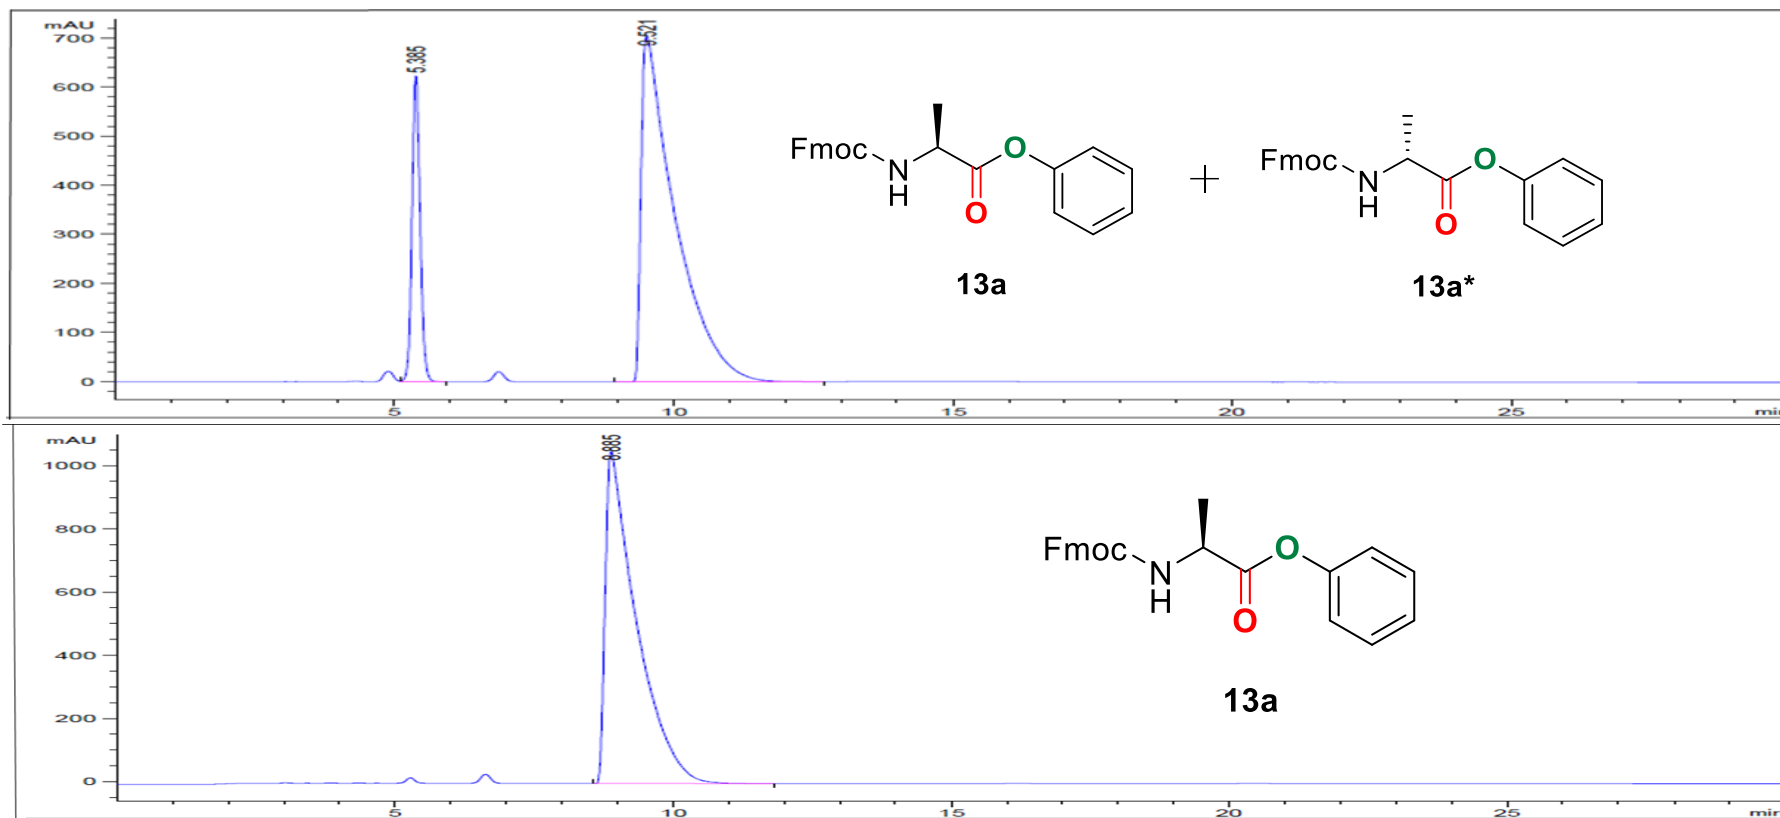

**HPLC condition:** water-acetonitrile (5-95%) in 30 min; VWD at  $\lambda = 254$  nm; flow rate: 1.0 mL/min; column: phenomenex made Lux, pore size-5 $\mu$ , Cellulose-1, diameter x length = 250 x 4.6 mm).

1) Mixed HPLC data of (L) 13a and (D) 13a\*

| Peak | Ret Time [min] | Area       | Height [mAU] | Area %  |
|------|----------------|------------|--------------|---------|
| 01   | 5.385          | 6370.93359 | 623.85791    | 17.6248 |
| 02   | 9.521          | 2.97765e4  | 704.49756    | 82.3752 |

2) Pure HPLC data of (L) 13a

| Peak | Ret Time [min] | Area      | Height [mAU] | Area %   |
|------|----------------|-----------|--------------|----------|
| 01   | 8.885          | 4.08192e4 | 1052.43628   | 100.0000 |

## HPLC studies for determining racemization of 13e

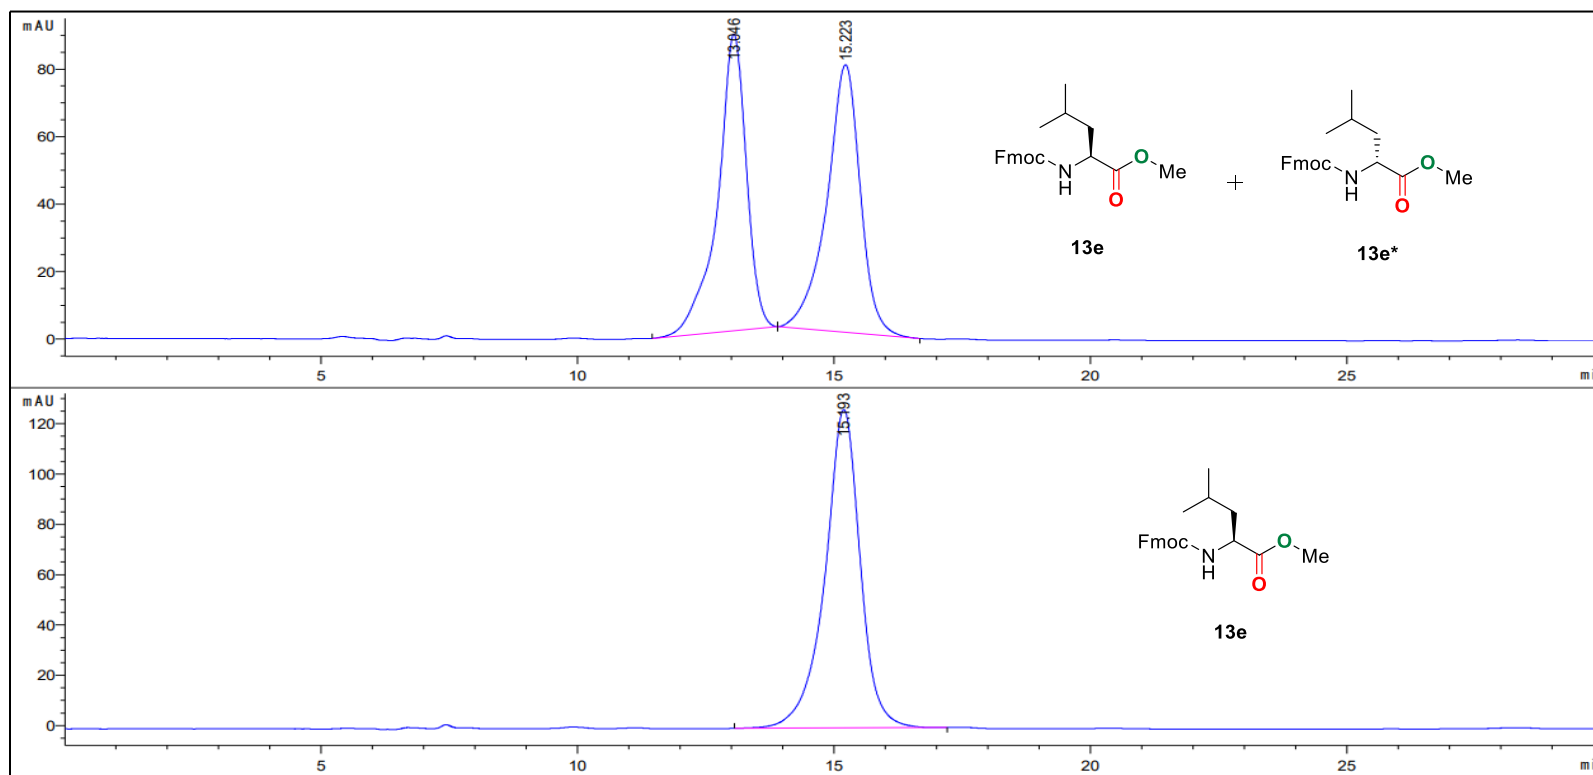

**HPLC condition:** water-methanol (20-80%) in 30 min; VWD at  $\lambda = 254$  nm; flow rate: 1 mL/min; column: phenomenex made Lux, pore size-5 $\mu$ , Cellulose-1, diameter x length = 250 x 4.6 mm).

- 1) Mixed HPLC data of (L)-13b and (D) 13b\*

| Peak | Ret Time [min] | Area       | Height [mAU] | Area %  |
|------|----------------|------------|--------------|---------|
| 01   | 13.046         | 3427.85913 | 87.93016     | 48.7894 |
| 02   | 15.223         | 3597.96167 | 79.31252     | 51.2106 |

2) Pure HPLC data of (L)-13b

| Peak | Ret Time [min] | Area       | Height [mAU] | Area %   |
|------|----------------|------------|--------------|----------|
| 01   | 15.193         | 6081.11279 | 126.53349    | 100.0000 |

### HPLC studies for determining purity of 13b

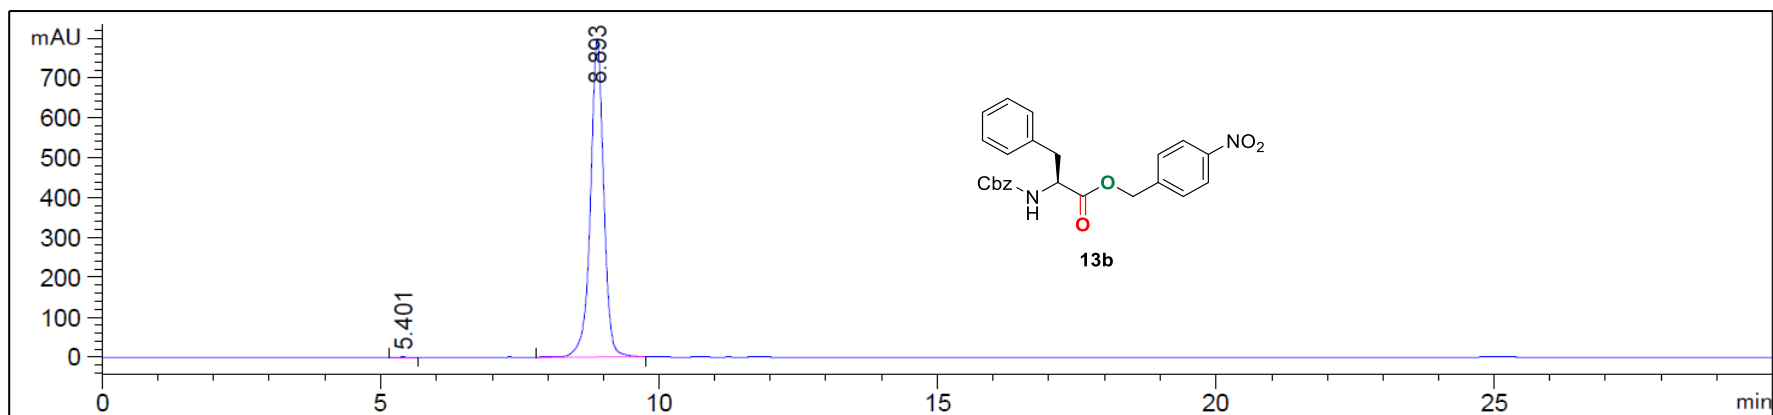



**HPLC condition:** water-acetonitrile (10-90%) in 30 min; VWD at  $\lambda = 254$  nm; flow rate: 1 mL/min; column: Eclipse XDB-C18, pore size-5 $\mu$ , diameter x length = 4.6 x 150mm).

| Peak | Ret Time [min] | Area      | Height [mAU] | Area %  |
|------|----------------|-----------|--------------|---------|
| 01   | 5.401          | 12.72812  | 1.02119      | 0.0961  |
| 02   | 8.893          | 1.32302e4 | 796.37695    | 99.9039 |

### HPLC studies for determining purity of 13c

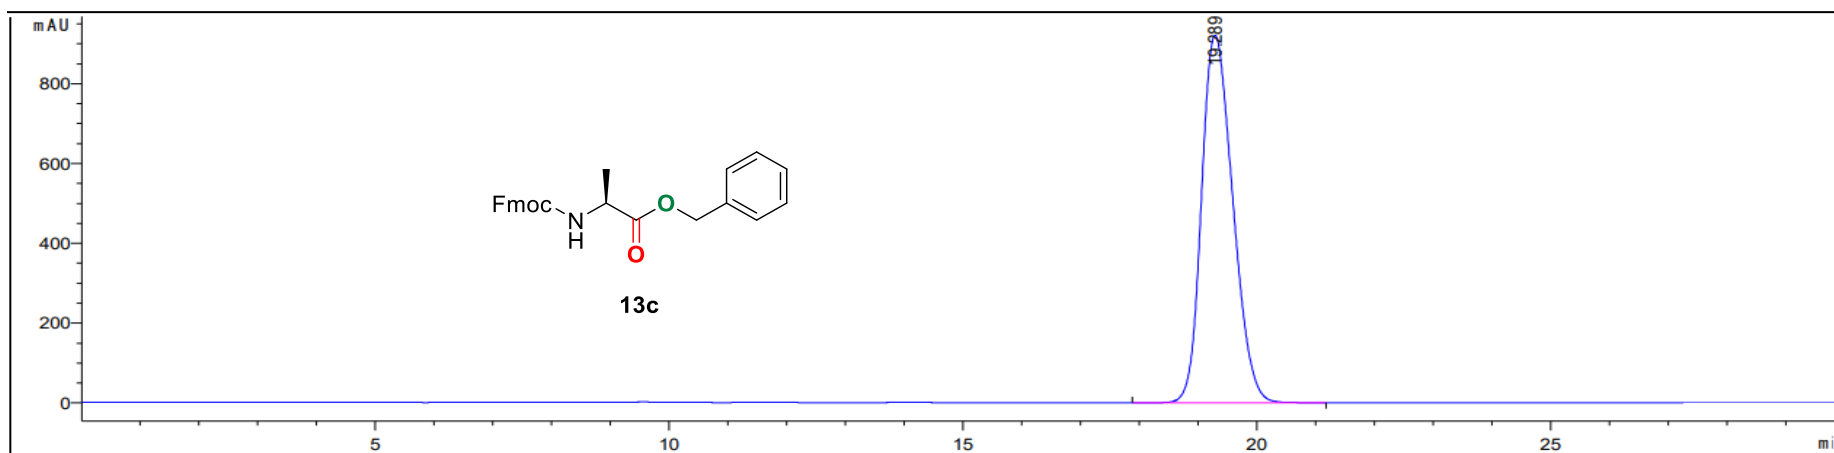

**HPLC condition:** water-acetonitrile (10-90%) in 30 min; VWD at  $\lambda = 254$  nm; flow rate: 1 mL/min; column: Eclipse XDB-C18, pore size-5 $\mu$ , diameter x length = 4.6 x 150mm).

| Peak | Ret Time [min] | Area      | Height [mAU] | Area %   |
|------|----------------|-----------|--------------|----------|
| 01   | 19.289         | 3.40364e4 | 921.13031    | 100.0000 |

### HPLC studies for determining purity of 13f

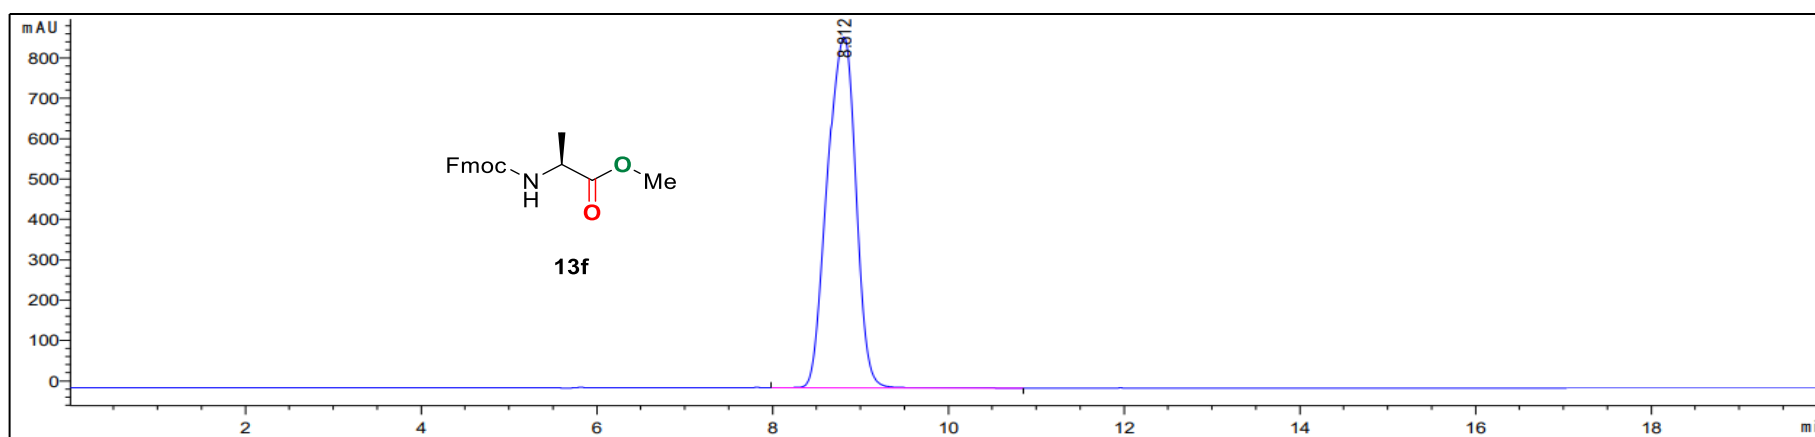

**HPLC condition:** water-methanol (10-90%) in 20 min; VWD at  $\lambda = 254$  nm; flow rate: 1 mL/min; column: Eclipse XDB-C18, pore size-5 $\mu$ , diameter x length = 4.6 x 150mm).

| Peak | Ret Time [min] | Area      | Height [mAU] | Area %   |
|------|----------------|-----------|--------------|----------|
| 01   | 8.812          | 1.96162e4 | 869.33234    | 100.0000 |

## HPLC studies for determining purity 13g

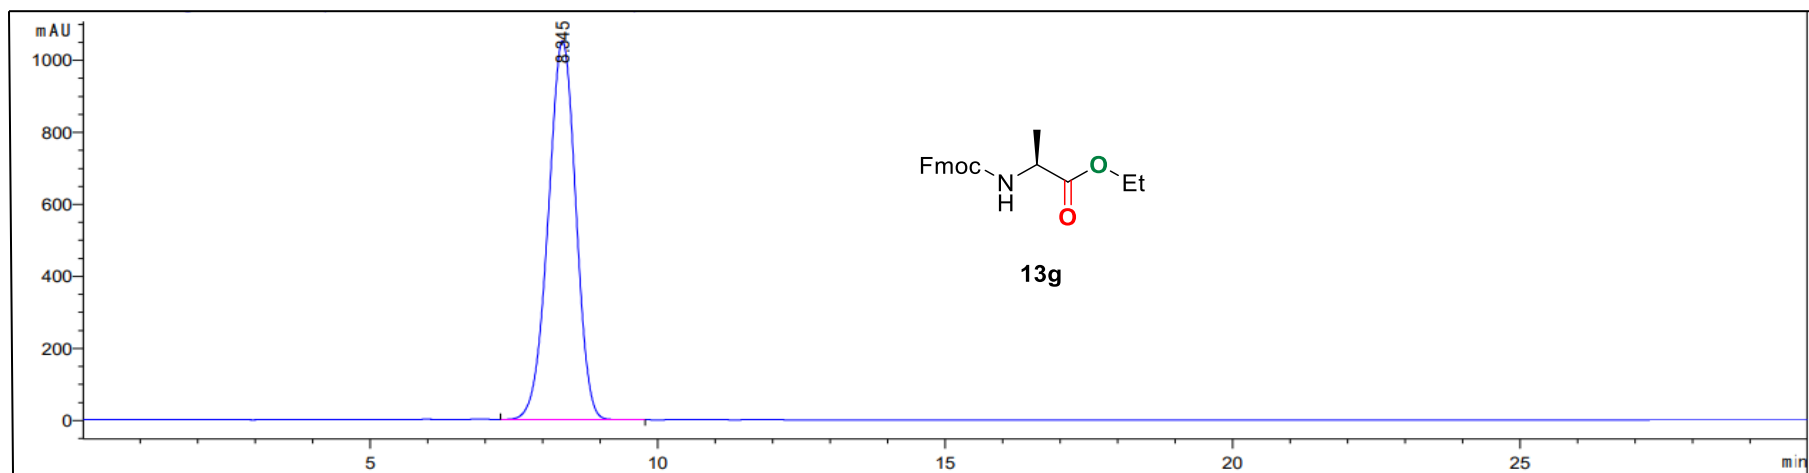

**HPLC condition:** water-methanol (10-90%) in 30 min; VWD at  $\lambda = 254$  nm; flow rate: 1 mL/min; column: Eclipse XDB-C18, pore size-5 $\mu$ , diameter x length = 4.6 x 150mm).

| Peak | Ret Time [min] | Area      | Height [mAU] | Area %   |
|------|----------------|-----------|--------------|----------|
| 01   | 8.345          | 3.51652e4 | 1052.47986   | 100.0000 |

## HPLC studies for determining purity 13h

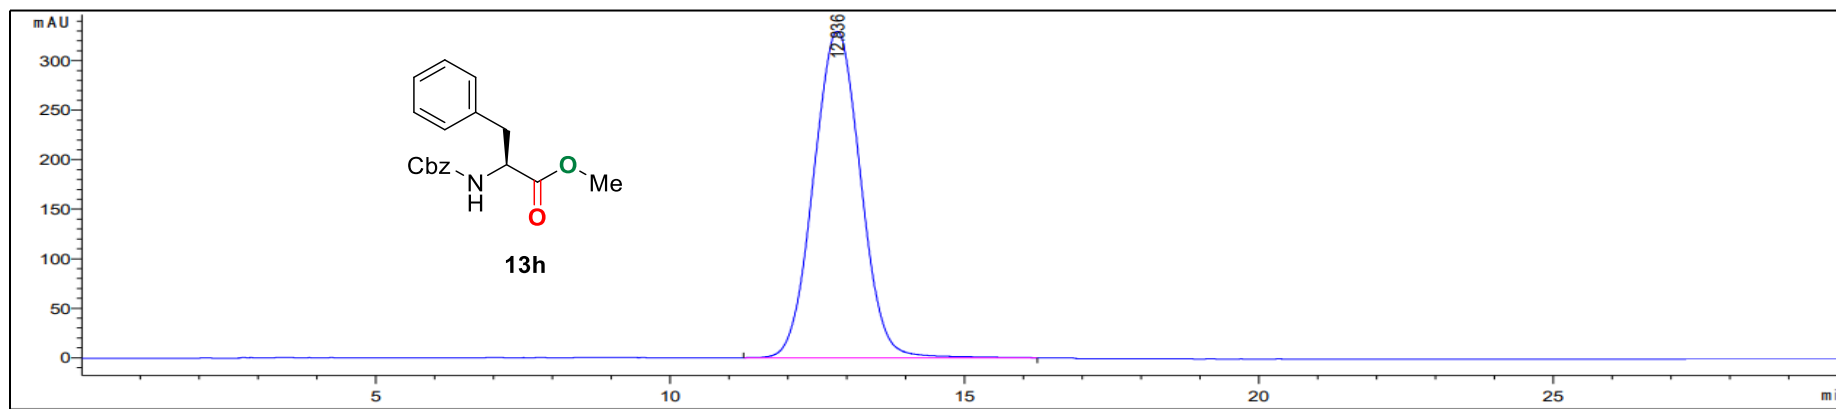

**HPLC condition:** water-methanol (10-90%) in 30 min; VWD at  $\lambda = 254$  nm; flow rate: 1 mL/min; column: Eclipse XDB-C18, pore size-5 $\mu$ , diameter x length = 4.6 x 150mm).

| Peak | Ret Time [min] | Area      | Height [mAU] | Area %   |
|------|----------------|-----------|--------------|----------|
| 01   | 12.836         | 1.82512e4 | 329.72797    | 100.0000 |

### Crystal Structure Analysis of (III) AITF (Code =TRY\_a):

Crystals were grown from  $\text{CDCl}_3$  solution by slow evaporation. A single crystal ( $0.18 \times 0.11 \times 0.16$  mm) was mounted on loop with a small amount of the paraffin oil. The X-ray data were collected at 296K temperature on a Bruker APEX(II) DUO CCD diffractometer using Mo  $K\alpha$  radiation ( $\lambda = 0.71073 \text{ \AA}$ ),  $\omega$ -scans ( $2\theta = 56.72$ ), for a total of 3763 independent reflections. Space group  $P2_1/n$ ,  $a = 5.5295(13)$ ,  $b = 21.270(5)$ ,  $c = 12.923(3)$ ,  $\alpha, \gamma = 90$  and  $\beta = 98.235(8)$ ,  $V = 1504.2(6) \text{ \AA}^3$ , monoclinic,  $Z = 4$  for chemical formula  $\text{C}_{10}\text{H}_8 \text{N}_2\text{O}_5\text{F}_6\text{S}_2$ , with one molecule in asymmetric unit;  $\rho_{\text{calcd}} = 1.829 \text{ gcm}^{-3}$ ,  $\mu = 0.451 \text{ mm}^{-1}$ ,  $F(000) = 832$ , The structure was obtained by direct methods using SHELXS-97.<sup>1</sup> The final R value was 0.0727 ( $wR2 = 0.2050$ ) 3763 observed reflections ( $F_o \geq 4\sigma(|F_o|)$ ) and 216 variables,  $S = 1.047$ .

## checkCIF/PLATON report

Structure factors have been supplied for datablock(s) TRY\_a

THIS REPORT IS FOR GUIDANCE ONLY. IF USED AS PART OF A REVIEW PROCEDURE FOR PUBLICATION, IT SHOULD NOT REPLACE THE EXPERTISE OF AN EXPERIENCED CRYSTALLOGRAPHIC REFEREE.

No syntax errors found. CIF dictionary Interpreting this report

### Datablock: TRY\_a

---

Bond precision: C-C = 0.0074 A Wavelength=0.71073  
Cell: a=5.5295 (13) b=21.270 (5) c=12.923 (3)  
alpha=90 beta=98.235 (8) gamma=90  
Temperature: 296 K

|                | Calculated         | Reported           |
|----------------|--------------------|--------------------|
| Volume         | 1504.2 (6)         | 1504.2 (6)         |
| Space group    | P 21/n             | P 21/n             |
| Hall group     | -P 2yn             | -P 2yn             |
| Moiety formula | C10 H8 F6 N2 O5 S2 | ?                  |
| Sum formula    | C10 H8 F6 N2 O5 S2 | C10 H8 F6 N2 O5 S2 |
| Mr             | 414.30             | 414.30             |
| Dx, g cm-3     | 1.829              | 1.830              |
| Z              | 4                  | 4                  |
| Mu (mm-1)      | 0.451              | 0.451              |
| F000           | 832.0              | 832.0              |
| F000'          | 833.69             |                    |
| h, k, lmax     | 7, 28, 17          | 7, 28, 17          |
| Nref           | 3769               | 3763               |
| Tmin, Tmax     |                    |                    |
| Tmin'          |                    |                    |

Correction method= Not given

Data completeness= 0.998 Theta (max)= 28.360

R(reflections)= 0.0727 ( 2610)

wR2(reflections)=  
0.2050 ( 3763)

S = 1.047

Npar= 216

---

The following ALERTS were generated. Each ALERT has the format  
**test-name\_ALERT\_alert-type\_alert-level.**  
Click on the hyperlinks for more details of the test.

---

**Alert level B**

|                   |                                                  |       |       |
|-------------------|--------------------------------------------------|-------|-------|
| PLAT031_ALERT_4_B | Refined Extinction Parameter Within Range of ... | 1.632 | Sigma |
| PLAT097_ALERT_2_B | Large Reported Max. (Positive) Residual Density  | 2.52  | eA-3  |
| PLAT230_ALERT_2_B | Hirshfeld Test Diff for C3 --C4                  | 9.0   | s.u.  |
| PLAT230_ALERT_2_B | Hirshfeld Test Diff for C3 --C8                  | 9.2   | s.u.  |

---

**Alert level C**

|                   |                                                                                                   |         |              |
|-------------------|---------------------------------------------------------------------------------------------------|---------|--------------|
| DIFMX02_ALERT_1_C | The maximum difference density is > 0.1*ZMAX*0.75<br>The relevant atom site should be identified. |         |              |
| RINTA01_ALERT_3_C | The value of Rint is greater than 0.12<br>Rint given 0.144                                        |         |              |
| PLAT020_ALERT_3_C | The Value of Rint is Greater Than 0.12 .....                                                      | 0.144   | Report       |
| PLAT052_ALERT_1_C | Info on Absorption Correction Method Not Given                                                    |         | Please Do !  |
| PLAT053_ALERT_1_C | Minimum Crystal Dimension Missing (or Error) ...                                                  |         | Please Check |
| PLAT054_ALERT_1_C | Medium Crystal Dimension Missing (or Error) ...                                                   |         | Please Check |
| PLAT055_ALERT_1_C | Maximum Crystal Dimension Missing (or Error) ...                                                  |         | Please Check |
| PLAT094_ALERT_2_C | Ratio of Maximum / Minimum Residual Density ...                                                   | 2.52    | Report       |
| PLAT213_ALERT_2_C | Atom N1 has ADP max/min Ratio .....                                                               | 3.3     | prolat       |
| PLAT230_ALERT_2_C | Hirshfeld Test Diff for N1 --C2                                                                   | 7.0     | s.u.         |
| PLAT241_ALERT_2_C | High 'MainMol' Ueq as Compared to Neighbors of                                                    |         | C3 Check     |
| PLAT250_ALERT_2_C | Large U3/U1 Ratio for Average U(i,j) Tensor ...                                                   |         | 2.7 Note     |
| PLAT340_ALERT_3_C | Low Bond Precision on C-C Bonds .....                                                             | 0.00743 | Ang.         |
| PLAT906_ALERT_3_C | Large K Value in the Analysis of Variance .....                                                   | 16.063  | Check        |
| PLAT906_ALERT_3_C | Large K Value in the Analysis of Variance .....                                                   | 2.582   | Check        |
| PLAT971_ALERT_2_C | Check Calcd Resid. Dens. 2.17Ang From O1                                                          | 2.39    | eA-3         |
| PLAT976_ALERT_2_C | Check Calcd Resid. Dens. 1.00Ang From O1                                                          | -0.45   | eA-3         |

---

**Alert level G**

|                   |                                                   |       |              |
|-------------------|---------------------------------------------------|-------|--------------|
| PLAT007_ALERT_5_G | Number of Unrefined Donor-H Atoms .....           | 1     | Report       |
| PLAT171_ALERT_4_G | The CIF-Embedded .res File Contains EADP Records  | 2     | Report       |
| PLAT242_ALERT_2_G | Low 'MainMol' Ueq as Compared to Neighbors of     |       | C9 Check     |
| PLAT242_ALERT_2_G | Low 'MainMol' Ueq as Compared to Neighbors of     |       | C10 Check    |
| PLAT434_ALERT_2_G | Short Inter HL..HL Contact F2 ..F6                | 2.78  | Ang.         |
|                   | 1/2+x, 3/2-y, 1/2+z =                             | 4_676 | Check        |
| PLAT883_ALERT_1_G | No Info/Value for _atom_sites_solution_primary    |       | Please Do !  |
| PLAT910_ALERT_3_G | Missing # of FCF Reflection(s) Below Theta (Min). | 2     | Note         |
| PLAT912_ALERT_4_G | Missing # of FCF Reflections Above STh/L= 0.600   | 4     | Note         |
| PLAT965_ALERT_2_G | The SHELXL WEIGHT Optimisation has not Converged  |       | Please Check |
| PLAT978_ALERT_2_G | Number C-C Bonds with Positive Residual Density.  | 1     | Info         |

---

- 0 **ALERT level A** = Most likely a serious problem - resolve or explain  
4 **ALERT level B** = A potentially serious problem, consider carefully  
17 **ALERT level C** = Check. Ensure it is not caused by an omission or oversight  
10 **ALERT level G** = General information/check it is not something unexpected

6 ALERT type 1 CIF construction/syntax error, inconsistent or missing data

15 ALERT type 2 Indicator that the structure model may be wrong or deficient  
6 ALERT type 3 Indicator that the structure quality may be low  
3 ALERT type 4 Improvement, methodology, query or suggestion  
1 ALERT type 5 Informative message, check

---

### Validation response form

Please find below a validation response form (VRF) that can be filled in and pasted into your CIF.

```
# start Validation Reply Form
_vrf_DIFMX02_TRY_a
;
PROBLEM: The maximum difference density is > 0.1*ZMAX*0.75
RESPONSE: ...
;
_vrf_RINTA01_TRY_a
;
PROBLEM: The value of Rint is greater than 0.12
RESPONSE: ...
;
_vrf_PLAT031_TRY_a
;
PROBLEM: Refined Extinction Parameter Within Range of ...      1.632 Sigma
RESPONSE: ...
;
_vrf_PLAT097_TRY_a
;
PROBLEM: Large Reported Max. (Positive) Residual Density      2.52 eA-3
RESPONSE: ...
;
_vrf_PLAT230_TRY_a
;
PROBLEM: Hirshfeld Test Diff for   C3      --C4      .      9.0 s.u.
RESPONSE: ...
;
_vrf_PLAT020_TRY_a
;
PROBLEM: The Value of Rint is Greater Than 0.12 .....      0.144 Report
RESPONSE: ...
;
_vrf_PLAT052_TRY_a
;
PROBLEM: Info on Absorption Correction Method   Not Given   Please Do !
RESPONSE: ...
;
_vrf_PLAT053_TRY_a
;
PROBLEM: Minimum Crystal Dimension Missing (or Error) ...   Please Check
RESPONSE: ...
;
_vrf_PLAT054_TRY_a
;
PROBLEM: Medium Crystal Dimension Missing (or Error) ...   Please Check
RESPONSE: ...
;
```



```

_vrf_PLAT055_TRY_a
;
PROBLEM: Maximum Crystal Dimension Missing (or Error) ... Please Check
RESPONSE: ...
;
_vrf_PLAT094_TRY_a
;
PROBLEM: Ratio of Maximum / Minimum Residual Density .... 2.52 Report
RESPONSE: ...
;
_vrf_PLAT213_TRY_a
;
PROBLEM: Atom N1 has ADP max/min Ratio ..... 3.3 prolat
RESPONSE: ...
;
_vrf_PLAT241_TRY_a
;
PROBLEM: High 'MainMol' Ueq as Compared to Neighbors of C3 Check
RESPONSE: ...
;
_vrf_PLAT250_TRY_a
;
PROBLEM: Large U3/U1 Ratio for Average U(i,j) Tensor .... 2.7 Note
RESPONSE: ...
;
_vrf_PLAT340_TRY_a
;
PROBLEM: Low Bond Precision on C-C Bonds ..... 0.00743 Ang.
RESPONSE: ...
;
_vrf_PLAT906_TRY_a
;
PROBLEM: Large K Value in the Analysis of Variance ..... 16.063 Check
RESPONSE: ...
;
_vrf_PLAT971_TRY_a
;
PROBLEM: Check Calcd Resid. Dens. 2.17Ang From O1 2.39 eA-3
RESPONSE: ...
;
_vrf_PLAT976_TRY_a
;
PROBLEM: Check Calcd Resid. Dens. 1.00Ang From O1 . -0.45 eA-3
RESPONSE: ...
;
# end Validation Reply Form

```

---

It is advisable to attempt to resolve as many as possible of the alerts in all categories. Often the minor alerts point to easily fixed oversights, errors and omissions in your CIF or refinement strategy, so attention to these fine details can be worthwhile. In order to resolve some of the more serious problems it may be necessary to carry out additional measurements or structure refinements. However, the purpose of your study may justify the reported deviations and the more serious of these should normally be commented upon in the discussion or experimental section of a paper or in the "special\_details" fields of the CIF. checkCIF was carefully designed to identify outliers and unusual parameters, but every test has its limitations and alerts that are not important in a particular case may appear. Conversely, the absence of alerts does not guarantee there are no aspects of the results needing attention. It is up to the individual to critically assess their own results and, if necessary, seek expert advice.

#### **Publication of your CIF in IUCr journals**

A basic structural check has been run on your CIF. These basic checks will be run on all CIFs submitted for publication in IUCr journals (*Acta Crystallographica*, *Journal of Applied Crystallography*, *Journal of Synchrotron Radiation*); however, if you intend to submit to *Acta Crystallographica Section C* or *E* or *IUCrData*, you should make sure that full publication checks are run on the final version of your CIF prior to submission.

#### **Publication of your CIF in other journals**

Please refer to the *Notes for Authors* of the relevant journal for any special instructions relating to CIF submission.

---

**PLATON version of 12/09/2022; check.def file version of 09/08/2022**

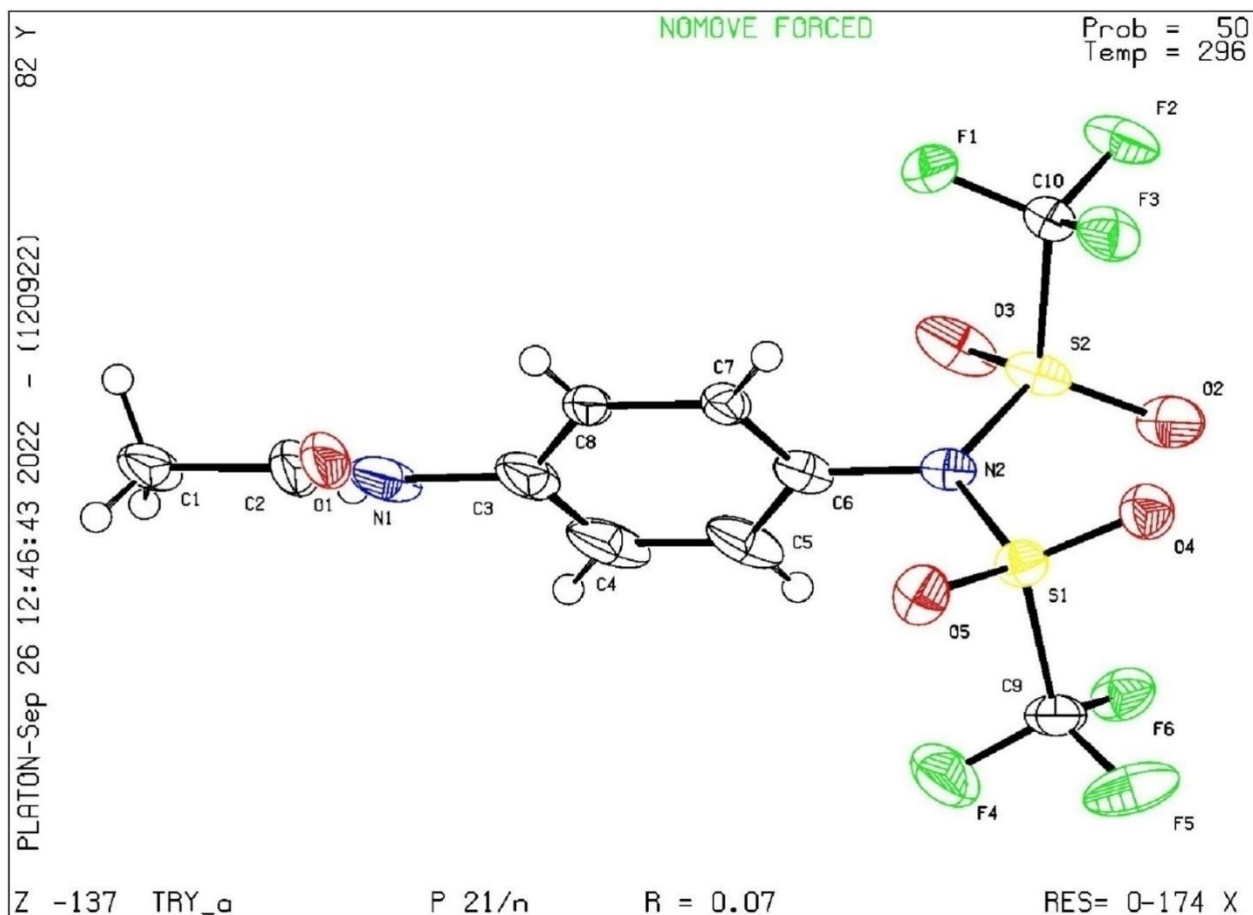

**Figure S175.** ORTEP diagram of **(III) AITF** (CCDC = **2209512**). Ellipsoids are drawn at 50% probability.

### Crystal Structure Analysis of 9e (Code =TRY6\_a):

Crystals were grown from MeOH solution by slow evaporation. A single crystal ( $0.16 \times 0.10 \times 0.12$  mm) was mounted on loop with a small amount of the paraffin oil. The X-ray data were collected at 273K temperature on a Bruker APEX(II) DUO CCD diffractometer using Mo K $\alpha$  radiation ( $\lambda = 0.71073 \text{ \AA}$ ),  $\omega$ -scans ( $2\theta = 56.646$ ), for a total of 2376 independent reflections. Space group C2/c,  $a = 11.206(3)$ ,  $b = 9.424(3)$ ,  $c = 18.834(6)$ ,  $\alpha, \gamma = 90$  and  $\beta = 106.89(9)$ ,  $V = 3440(3) \text{ \AA}^3$ , monoclinic,  $Z = 8$  for chemical formula  $C_{11} H_8 NO_2 F$ , with one molecule in asymmetric unit;  $\rho_{\text{calcd}} = 1.432 \text{ g cm}^{-3}$ ,  $\mu = 0.112 \text{ mm}^{-1}$ ,  $F(000) = 848$ , The structure was obtained by direct methods using SHELXS-97.<sup>1</sup> The final R value was 0.0407 ( $wR2 = 0.0931$ ) 1838 observed reflections ( $F_o \geq 4\sigma(|F_o|)$ ) and 137 variables,  $S = 0.935$

## checkCIF/PLATON report

Structure factors have been supplied for datablock(s) TRY6\_a

THIS REPORT IS FOR GUIDANCE ONLY. IF USED AS PART OF A REVIEW PROCEDURE FOR PUBLICATION, IT SHOULD NOT REPLACE THE EXPERTISE OF AN EXPERIENCED CRYSTALLOGRAPHIC REFEREE.

No syntax errors found. CIF dictionary Interpreting this report

### Datablock: TRY6\_a

---

Bond precision: C-C = 0.0020 A Wavelength=0.71073  
Cell: a=11.206 (3) b=9.424 (3) c=18.834 (6)  
alpha=90 beta=106.890 (9) gamma=90  
Temperature: 273 K

|                | Calculated    | Reported      |
|----------------|---------------|---------------|
| Volume         | 1903.2 (10)   | 1903.2 (10)   |
| Space group    | C 2/c         | C 2/c         |
| Hall group     | -C 2yc        | -C 2yc        |
| Moiety formula | C11 H8 F N O2 | ?             |
| Sum formula    | C11 H8 F N O2 | C11 H8 F N O2 |
| Mr             | 205.18        | 205.18        |
| Dx, g cm-3     | 1.432         | 1.432         |
| Z              | 8             | 8             |
| Mu (mm-1)      | 0.112         | 0.112         |
| F000           | 848.0         | 848.0         |
| F000'          | 848.51        |               |
| h, k, lmax     | 14, 12, 25    | 14, 12, 25    |
| Nref           | 2376          | 1838          |
| Tmin, Tmax     |               |               |
| Tmin'          |               |               |

Correction method= Not given

Data completeness= 0.774 Theta (max)= 28.323

R(reflections)= 0.0407 ( 1288)

wR2(reflections)=  
0.0931 ( 1838)

S = 0.935

Npar= 137

---

The following ALERTS were generated. Each ALERT has the format  
**test-name\_ALERT\_alert-type\_alert-level.**  
Click on the hyperlinks for more details of the test.

---

**Alert level B**

PLAT911\_ALERT\_3\_B Missing FCF Refl Between Thmin & STh/L= 0.600 489 Report

---

**Alert level C**

PLAT052\_ALERT\_1\_C Info on Absorption Correction Method Not Given Please Do !  
PLAT053\_ALERT\_1\_C Minimum Crystal Dimension Missing (or Error) ... Please Check  
PLAT054\_ALERT\_1\_C Medium Crystal Dimension Missing (or Error) ... Please Check  
PLAT055\_ALERT\_1\_C Maximum Crystal Dimension Missing (or Error) ... Please Check  
PLAT906\_ALERT\_3\_C Large K Value in the Analysis of Variance ..... 2.292 Check  
PLAT934\_ALERT\_3\_C Number of (Iobs-Icalc)/Sigma(W) > 10 Outliers .. 1 Check

---

**Alert level G**

PLAT007\_ALERT\_5\_G Number of Unrefined Donor-H Atoms ..... 1 Report  
PLAT019\_ALERT\_1\_G \_diffrn\_measured\_fraction\_theta\_full/\*\_max < 1.0 0.926 Report  
PLAT199\_ALERT\_1\_G Reported \_cell\_measurement\_temperature .... (K) 273 Check  
PLAT200\_ALERT\_1\_G Reported \_diffrn\_ambient\_temperature .... (K) 273 Check  
PLAT398\_ALERT\_2\_G Deviating C-O-C Angle From 120 for O3 . 106.0 Degree  
PLAT883\_ALERT\_1\_G No Info/Value for \_atom\_sites\_solution\_primary . Please Do !  
PLAT912\_ALERT\_4\_G Missing # of FCF Reflections Above STh/L= 0.600 50 Note  
PLAT913\_ALERT\_3\_G Missing # of Very Strong Reflections in FCF .... 1 Note  
PLAT978\_ALERT\_2\_G Number C-C Bonds with Positive Residual Density. 4 Info

---

- 0 **ALERT level A** = Most likely a serious problem - resolve or explain  
1 **ALERT level B** = A potentially serious problem, consider carefully  
6 **ALERT level C** = Check. Ensure it is not caused by an omission or oversight  
9 **ALERT level G** = General information/check it is not something unexpected

- 8 ALERT type 1 CIF construction/syntax error, inconsistent or missing data  
2 ALERT type 2 Indicator that the structure model may be wrong or deficient  
4 ALERT type 3 Indicator that the structure quality may be low  
1 ALERT type 4 Improvement, methodology, query or suggestion  
1 ALERT type 5 Informative message, check
- 

**Validation response form**

Please find below a validation response form (VRF) that can be filled in and pasted into your CIF.

```
# start Validation Reply Form
_vrf_PLAT911_TRY6_a
;
PROBLEM: Missing FCF Refl Between Thmin & STh/L= 0.600 489 Report
RESPONSE: ...
;
_vrf_PLAT052_TRY6_a
;
PROBLEM: Info on Absorption Correction Method Not Given Please Do !
```

```
RESPONSE: ...
;
_vrf_PLAT053_TRY6_a
;
PROBLEM: Minimum Crystal Dimension Missing (or Error) ... Please Check
RESPONSE: ...
;
_vrf_PLAT054_TRY6_a
;
PROBLEM: Medium Crystal Dimension Missing (or Error) ... Please Check
RESPONSE: ...
;
_vrf_PLAT055_TRY6_a
;
PROBLEM: Maximum Crystal Dimension Missing (or Error) ... Please Check
RESPONSE: ...
;
_vrf_PLAT906_TRY6_a
;
PROBLEM: Large K Value in the Analysis of Variance ..... 2.292 Check
RESPONSE: ...
;
_vrf_PLAT934_TRY6_a
;
PROBLEM: Number of (Iobs-Icalc)/Sigma(W) > 10 Outliers .. 1 Check
RESPONSE: ...
;
# end Validation Reply Form
```

---

It is advisable to attempt to resolve as many as possible of the alerts in all categories. Often the minor alerts point to easily fixed oversights, errors and omissions in your CIF or refinement strategy, so attention to these fine details can be worthwhile. In order to resolve some of the more serious problems it may be necessary to carry out additional measurements or structure refinements. However, the purpose of your study may justify the reported deviations and the more serious of these should normally be commented upon in the discussion or experimental section of a paper or in the "special\_details" fields of the CIF. checkCIF was carefully designed to identify outliers and unusual parameters, but every test has its limitations and alerts that are not important in a particular case may appear. Conversely, the absence of alerts does not guarantee there are no aspects of the results needing attention. It is up to the individual to critically assess their own results and, if necessary, seek expert advice.

#### **Publication of your CIF in IUCr journals**

A basic structural check has been run on your CIF. These basic checks will be run on all CIFs submitted for publication in IUCr journals (*Acta Crystallographica*, *Journal of Applied Crystallography*, *Journal of Synchrotron Radiation*); however, if you intend to submit to *Acta Crystallographica Section C* or *E* or *IUCrData*, you should make sure that full publication checks are run on the final version of your CIF prior to submission.

#### **Publication of your CIF in other journals**

Please refer to the *Notes for Authors* of the relevant journal for any special instructions relating to CIF submission.

---

**PLATON version of 12/09/2022; check.def file version of 09/08/2022**



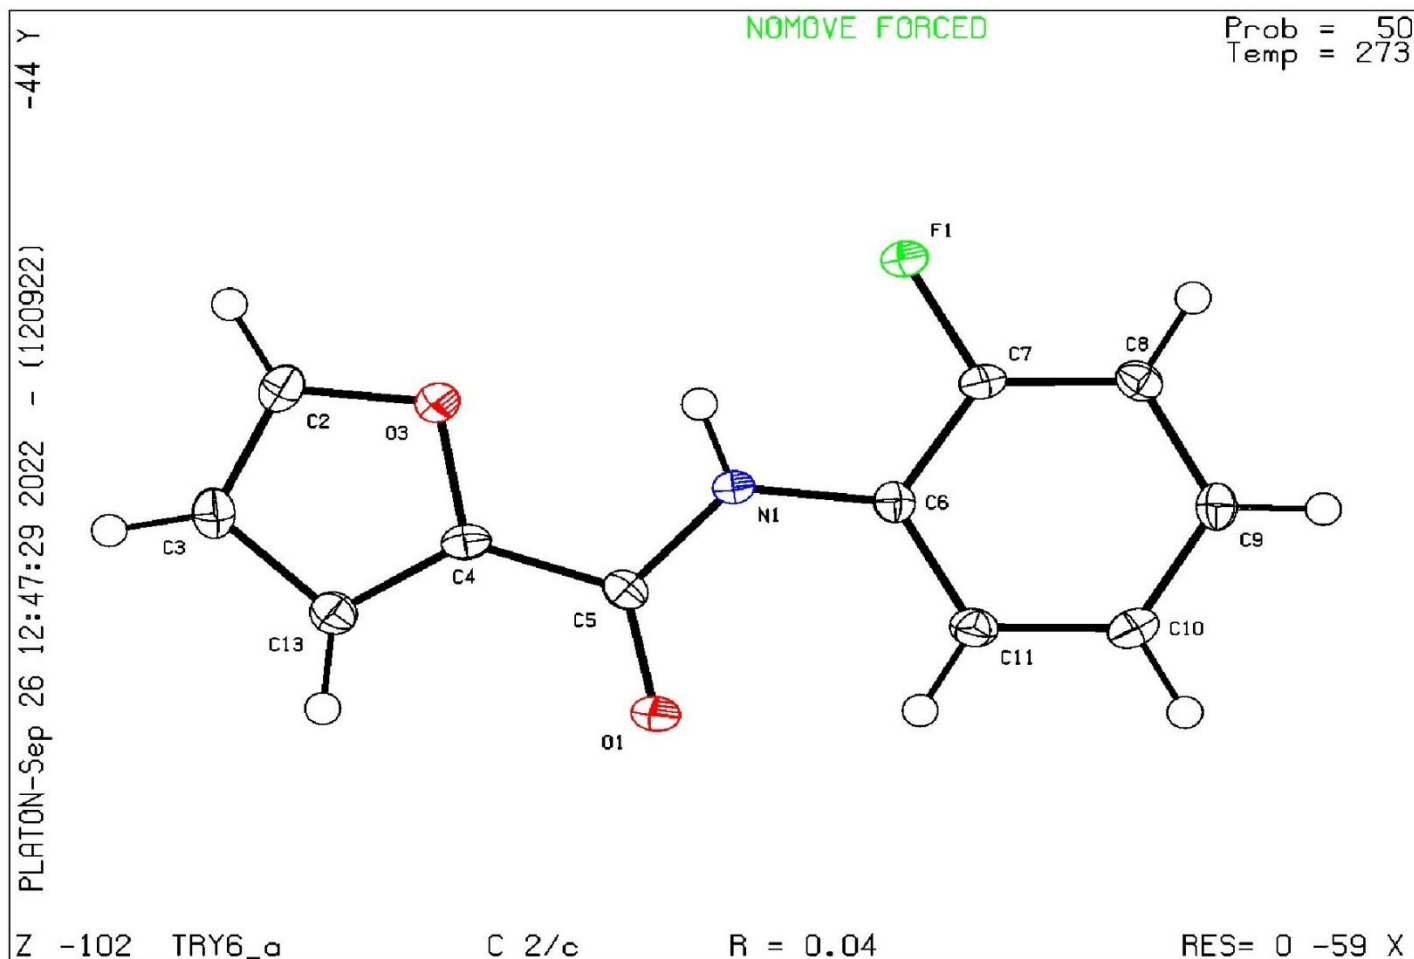

**Figure S76.** ORTEP diagram of **9e** (CCDC = 2209513). Ellipsoids are drawn at 50% probability.

**Reference:**

- 1) Sheldrick, G. M. *Acta Crystallography. Sect A.* 1990, **46**, 467.

## Differential scanning calorimetry (DSC) analysis of triflate surrogates

- (A) DSC data was obtained on Perkin Elmer Differential scanning calorimeter 8000 **II** (5.050mg) was loaded into aluminum volatile pan and held at 25 °C for 10 min then 25 °C to 180 °C at 10 °C/min.
- (B) DSC data was obtained on Perkin Elmer Differential scanning calorimeter 8000 **III** (4.150mg) was loaded into aluminum volatile pan and held at 25 °C for 10 min then 25 °C to 180 °C at 10 °C/min.
- (C) DSC data was obtained on Perkin Elmer Differential scanning calorimeter 8000 **IV** (4.150mg) was loaded into aluminum volatile pan and held at 25 °C for 10 min then 25 °C to 180 °C at 10 °C/min.
- (D) DSC data was obtained on Perkin Elmer Differential scanning calorimeter 8000 **V** (3.930mg) was loaded into aluminum volatile pan and held at 25 °C for 10 min then 25 °C to 180 °C at 10 °C/min.

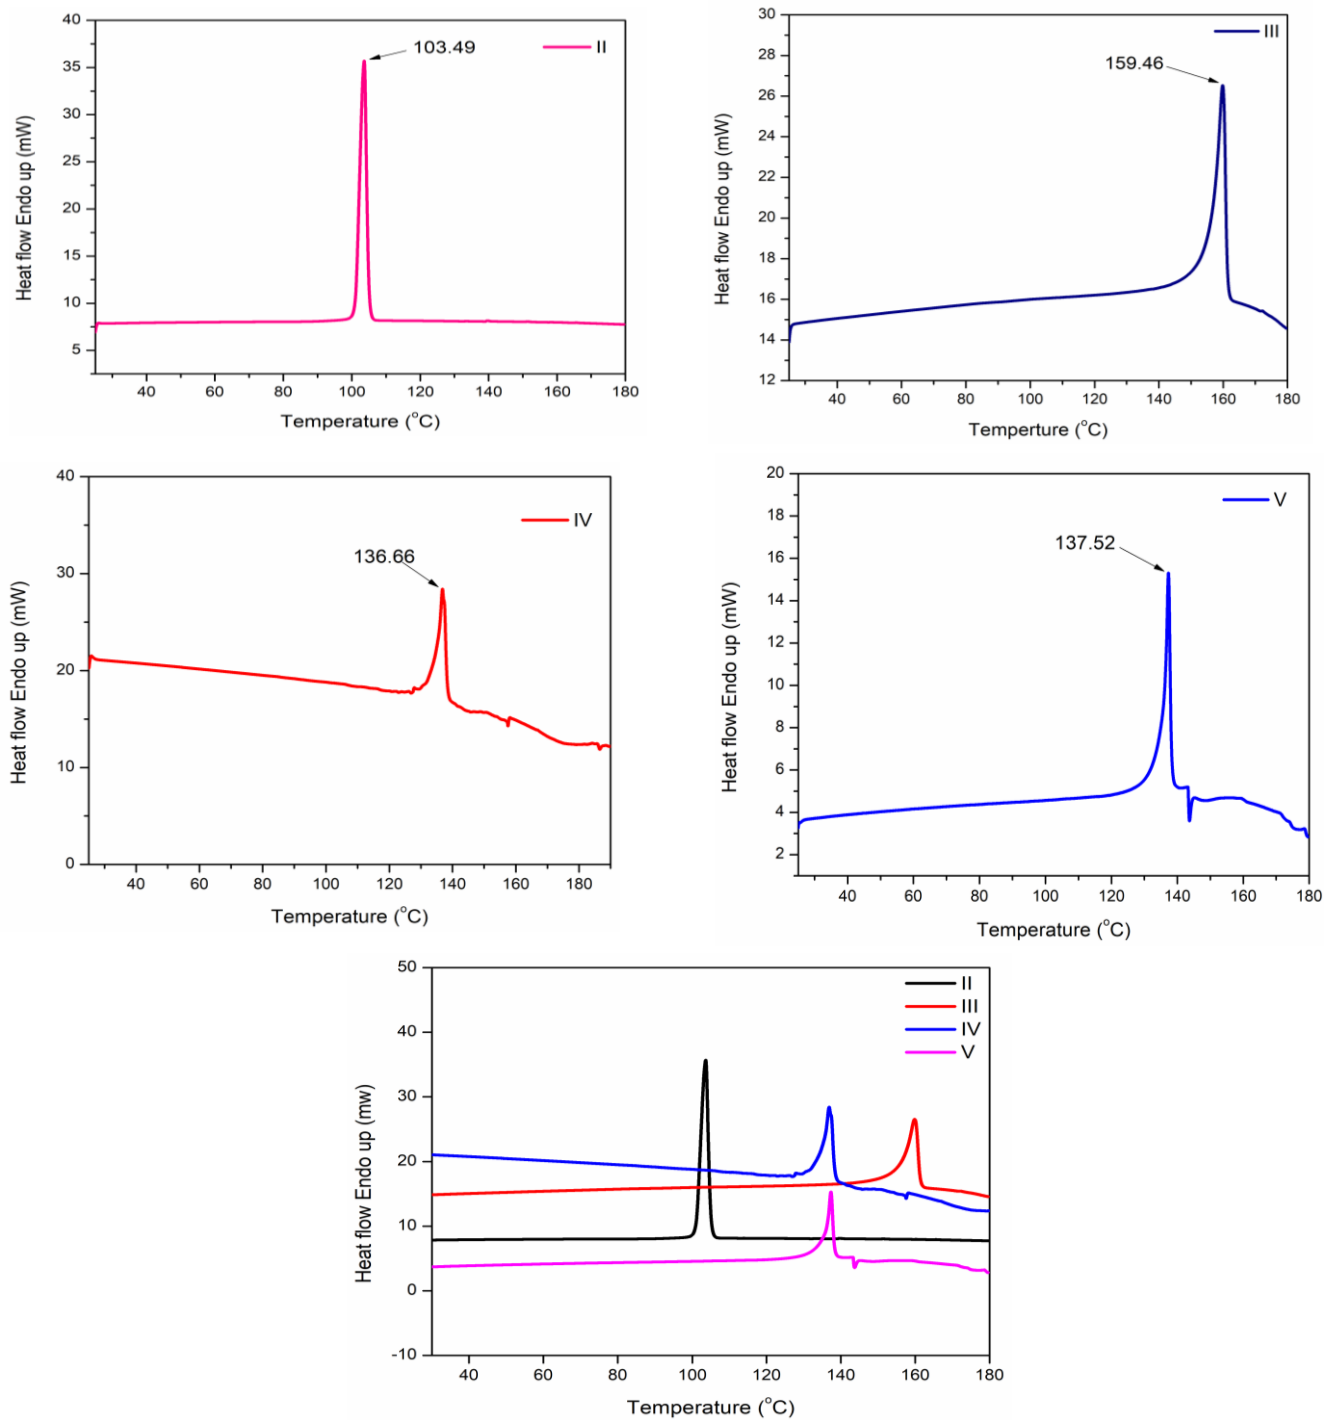

**Figure S177. DSC data of triflate surrogates II-V**
